# Supplementary material for: ABCC Transporter Gene MoABC-R1 Is Associated with Pyraclostrobin Tolerance in Magnaporthe oryzae
Source: MDPI journal article supplement (doi:10.3390/jof9090917), 2023-09-11
Supplement: s1 [file s1]

|          | 1      | 10                           | 20                             | 30               | 40               | 50 | 60 |
|----------|--------|------------------------------|--------------------------------|------------------|------------------|----|----|
| 1_4160   | MECPAD | ADRVFGPAI                    | QGCRSDFDFTLLFQDSVLGILPSSSVLI   | I                | LAARLVFLARRHAVAS |    |    |
| 2_6143   | MECPAD | ADRVFGPAI                    | QGCRSDFDFTLLFQDSVLGILPSSSVLI   | I                | LAARLVFLARRHAVAS |    |    |
| 3_6554   | MECPAD | ADRVFGPAI                    | QGCRSDFDFTLLFQDSVLGILPSSSVLI   | I                | LAARLVFLARRHAVAS |    |    |
| 4_111    | MECPAD | ADRVFGPAI                    | QGCRSDFDFTLLFQDSVLGILPSSSVLI   | I                | LAARLVFLARRHAVAS |    |    |
| 5_5742   | MECPAD | ADRVFGPAI                    | QGCRSDFDFTLLFQDSVLGILPSSSVLI   | I                | LAARLVFLARRHAVAS |    |    |
| 6_9490   | MECPAD | ADRVFGPAI                    | QGCRSDFDFTLLFQDSVLGILPSSSVLI   | I                | LAARLVFLARRHAVAS |    |    |
| 7_6313   | MISDV  | QRIVGGIVYVHEMWAGVLETALATYLLQ | RVMGVSSVAM                     | GLALAYSTITLSPLLV |                  |    |    |
| 8_2552   | MECPAD | ADRVFGPAI                    | QGCRSDFDFTLLFQDSVLGILPSSSVLI   | I                | LAARLVFLARRHAVAS |    |    |
| 9_7745   | MECPAD | ADRVFGPAI                    | QGCRSDFDFTLLFQDSVLGILPSSSVLI   | I                | LAARLVFLARRHAVAS |    |    |
| 10_2315  | MECPAD | ADRVFGPAI                    | QGCRSDFDFTLLFQDSVLGILPSSSVLI   | I                | LAARLVFLARRHAVAS |    |    |
| 11_2035  | MECPAD | ADRVFGPAI                    | QGCRSDFDFTLLFQDSVLGILPSSSVLI   | I                | LAARLVFLARRHAVAS |    |    |
| 12_9640  | MECPAD | ADRVFGPAI                    | QGCRSDFDFTLLFQDSVLGILPSSSVLI   | I                | LAARLVFLARRHAVAS |    |    |
| 13_3674  | MECPAD | ADRVFGPAI                    | QGCRSDFDFTLLFQDSVLGILPSSSVLI   | I                | LAARLVFLARRHAVAS |    |    |
| 14_6548  | MECPAD | ADRVFGPAI                    | QGCRSDFDFTLLFQDSVLGILPSSSVLI   | I                | LAARLVFLARRHAVAS |    |    |
| 15_10828 | MECPAD | ADRVFGPAI                    | QGCRSDFDFTLLFQDSVLGILPSSSVLI   | I                | LAARLVFLARRHAVAS |    |    |
| 16_6578  | MECPAD | ADRVFGPAI                    | QGCRSDFDFTLLFQDSVLGILPSSSVLI   | I                | LAARLVFLARRHAVAS |    |    |
| 17_10233 | MECPAD | ADRVFGPAI                    | QGCRSDFDFTLLFQDSVLGILPSSSVLI   | I                | LAARLVFLARRHAVAS |    |    |
| 18_9261  | MECPAD | ADRVFGPAI                    | QGCRSDFDFTLLFQDSVLGILPSSSVLI   | I                | LAARLVFLARRHAVAS |    |    |
| 19_8450  | MECPAD | ADRVFGPAI                    | QGCRSDFDFTLLFQDSVLGILPSSSVLI   | I                | LAARLVFLARRHAVAS |    |    |
| 20_1727  | MECPAD | ADRVFGPAI                    | QGCRSDFDFTLLFQDSVLGILPSSSVLI   | I                | LAARLVFLARRHAVAS |    |    |
| 21_206   | MECPAD | ADRVFGPAI                    | QGCRSDFDFTLLFQDSVLGILPSSSVLI   | I                | LAARLVFLARRHAVAS |    |    |
| 22_7439  | MECPAD | ADRVFGPAI                    | QGCRSDFDFTLLFQDSVLGILPSSSVLI   | I                | LAARLVFLARRHAVAS |    |    |
| 23_3780  | MECPAD | ADRVFGPAI                    | QGCRSDFDFTLLFQDSVLGILPSSSVLI   | I                | LAARLVFLARRHAVAS |    |    |
| 24_967   | MECPAD | ADRVFGPAI                    | QGCRSDFDFTLLFQDSVLGILPSSSVLI   | I                | LAARLVFLARRHAVAS |    |    |
| 25_6595  | MECPAD | ADRVFGPAI                    | QGCRSDFDFTLLFQDSVLGILPSSSVLI   | I                | LAARLVFLARRHAVAS |    |    |
| 26_8391  | MECPAD | ADRVFGPAI                    | QGCRSDFDFTLLFQDSVLGILPSSSVLI   | I                | LAARLVFLARRHAVAS |    |    |
| 27_8170  | MECPAD | ADRVFGPAI                    | QGCRSDFDFTLLFQDSVLGILPSSSVLI   | I                | LAARLVFLARRHAVAS |    |    |
| 28_5209  | MECPAD | ADRVFGPAI                    | QGCRSDFDFTLLFQDSVLGILPSSSVLI   | I                | LAARLVFLARRHAVAS |    |    |
| 29_2181  | MECPAD | ADRVFGPAI                    | QGCRSDFDFTLLFQDSVLGILPSSSVLI   | I                | LAARLVFLARRHAVAS |    |    |
| 30_8564  | MECPAD | ADRVFGPAI                    | QGCRSDFDFTLLFQDSVLGILPSSSVLI   | I                | LAARLVFLARRHAVAS |    |    |
| 31_1582  | MECPAD | ADRVFGPAI                    | QGCRSDFDFTLLFQDSVLGILPSSSVLI   | I                | LAARLVFLARRHAVAS |    |    |
| 32_4537  | MECPAD | ADRVFGPAI                    | QGCRSDFDFTLLFQDSVLGILPSSSVLI   | I                | LAARLVFLARRHAVAS |    |    |
| 33_9418  | MECPAD | ADRVFGPAI                    | QGCRSDFDFTLLFQDSVLGILPSSSVLI   | I                | LAARLVFLARRHAVAS |    |    |
| 34_1782  | MECPAD | ADRVFGPAI                    | QGCRSDFDFTLLFQDSVLGILPSSSVLI   | I                | LAARLVFLARRHAVAS |    |    |
| 35_10360 | MECPAD | ADRVFGPAI                    | QGCRSDFDFTLLFQDSVLGILPSSSVLI   | I                | LAARLVFLARRHAVAS |    |    |
| 36_468   | MECPAD | ADRVFGPAI                    | QGCRSDFDFTLLFQDSVLGILPSSSVLI   | I                | LAARLVFLARRHAVAS |    |    |
| 37_4956  | MECPAD | ADRVFGPAI                    | QGCRSDFDFTLLFQDSVLGILPSSSVLI   | I                | LAARLVFLARRHAVAS |    |    |
| 38_4305  | MECPAD | ADRVFGPAI                    | QGCRSDFDFTLLFQDSVLGILPSSSVLI   | I                | LAARLVFLARRHAVAS |    |    |
| 39_4737  | MECPAD | ADRVFGPAI                    | QGCRSDFDFTLLFQDSVLGILPSSSVLI   | I                | LAARLVFLARRHAVAS |    |    |
| 40_9543  | MECPAD | ADRVFGPAI                    | QGCRSDFDFTLLFQDSVLGILPSSSVLI   | I                | LAARLVFLARRHAVAS |    |    |
| 41_6669  | MECPAD | ADRVFGPAI                    | QGCRSDFDFTLLFQDSVLGILPSSSVLI   | I                | LAARLVFLARRHAVAS |    |    |
| 42_10558 | MECPAD | ADRVFGPAI                    | QGCRSDFDFTLLFQDSVLGILPSSSVLI   | I                | LAARLVFLARRHAVAS |    |    |
| 43_8051  | MECPAD | ADRVFGPAI                    | QGCRSDFDFTLLFQDSVLGILPSSSVLI   | I                | LAARLVFLARRHAVAS |    |    |
| 44_10454 | MECPAD | ADRVFGPAI                    | QGCRSDFDFTLLFQDSVLGILPSSSVLI   | I                | LAARLVFLARRHAVAS |    |    |
| 45_10126 | MECPAD | ADRVFGPAI                    | QGCRSDFDFTLLFQDSVLGILPSSSVLI   | I                | LAARLVFLARRHAVAS |    |    |
| 46_1547  | MECPAD | ADRVFGPAI                    | QGCRSDFDFTLLFQDSVLGILPSSSVLI   | I                | LAARLVFLARRHAVAS |    |    |
| 47_6749  | MECPAD | ADRVFGPAI                    | QGCRSDFDFTLLFQDSVLGILPSSSVLI   | I                | LAARLVFLARRHAVAS |    |    |
| 48_9982  | MECPAD | ADRVFGPAI                    | QGCRSDFDFTLLFQDSVLGILPSSSVLI   | I                | LAARLVFLARRHAVAS |    |    |
| 49_7293  | MECPAD | ADRVFGPAI                    | QGCRSDFDFTLLFQDSVLGILPSSSVLI   | I                | LAARLVFLARRHAVAS |    |    |
| 50_5993  | MECPAD | ADRVFGPAI                    | QGCRSDFDFTLLFQDSVLGILPSSSVLI   | I                | LAARLVFLARRHAVAS |    |    |
| 51_4791  | MECPAD | ADRVFGPAI                    | QGCRSDFDFTLLFQDSVLGILPSSSVLI   | I                | LAARLVFLARRHAVAS |    |    |
| 52_121   | MECPAD | ADRVFGPAI                    | QGCRSDFDFTLLFQDSVLGILPSSSVLI   | I                | LAARLVFLARRHAVAS |    |    |
| 53_1667  | MECPAD | ADRVFGPAI                    | QGCRSDFDFTLLFQDSVLGILPSSSVLI   | I                | LAARLVFLARRHAVAS |    |    |
| 54_10488 | MECPAD | ADRVFGPAI                    | QGCRSDFDFTLLFQDSVLGILPSSSVLI   | I                | LAARLVFLARRHAVAS |    |    |
| 55_7733  | MECPAD | ADRVFGPAI                    | QGCRSDFDFTLLFQDSVLGILPSSSVLI   | I                | LAARLVFLARRHAVAS |    |    |
| 56_3982  | MECPAD | ADRVFGPAI                    | QGCRSDFDFTLLFQDSVLGILPSSSVLI   | I                | LAARLVFLARRHAVAS |    |    |
| 57_392   | MECPAD | ADRVFGPAI                    | QGCRSDFDFTLLFQDSVLGILPSSSVLI   | I                | LAARLVFLARRHAVAS |    |    |
| 58_10291 | MECPAD | ADRVFGPAI                    | QGCRSDFDFTLLFQDSVLGILPSSSVLI   | I                | LAARLVFLARRHAVAS |    |    |
| 59_5792  | MECPAD | ADRVFGPAI                    | QGCRSDFDFTLLFQDSVLGILPSSSVLI   | I                | LAARLVFLARRHAVAS |    |    |
| 60_8712  | MECPAD | ADRVFGPAI                    | QGCRSDFDFTLLFQDSVLGILPSSSVLI   | I                | LAARLVFLARRHAVAS |    |    |
| 61_6716  | MECPAD | ADRVFGPAI                    | QGCRSDFDFTLLFQDSVLGILPSSSVLI   | I                | LAARLVFLARRHAVAS |    |    |
| 62_5599  | MECPAD | ADRVFGPAI                    | QGCRSDFDFTLLFQDSVLGILPSSSVLI   | I                | LAARLVFLARRHAVAS |    |    |
| 63_304   | MECPAD | ADRVFGPAI                    | QGCRSDFDFTLLFQDSVLGILPSSSVLI   | I                | LAARLVFLARRHAVAS |    |    |
| 64_10473 | MNRFN  | QDLMFVDT                     | RLPIDLFNTSIDFFITIIQLILVVLVSKEA | AILP             | VVFGALYLIQKV     |    |    |
| 65_6310  | MECPAD | ADRVFGPAI                    | QGCRSDFDFTLLFQDSVLGILPSSSVLI   | I                | LAARLVFLARRHAVAS |    |    |
| 66_8714  | MECPAD | ADRVFGPAI                    | QGCRSDFDFTLLFQDSVLGILPSSSVLI   | I                | LAARLVFLARRHAVAS |    |    |
| 67_2350  | MECPAD | ADRVFGPAI                    | QGCRSDFDFTLLFQDSVLGILPSSSVLI   | I                | LAARLVFLARRHAVAS |    |    |
| 68_2447  | MECPAD | ADRVFGPAI                    | QGCRSDFDFTLLFQDSVLGILPSSSVLI   | I                | LAARLVFLARRHAVAS |    |    |
| 69_5658  | MECPAD | ADRVFGPAI                    | QGCRSDFDFTLLFQDSVLGILPSSSVLI   | I                | LAARLVFLARRHAVAS |    |    |
| 70_1277  | MECPAD | ADRVFGPAI                    | QGCRSDFDFTLLFQDSVLGILPSSSVLI   | I                | LAARLVFLARRHAVAS |    |    |
| 71_3717  | MECPAD | ADRVFGPAI                    | QGCRSDFDFTLLFQDSVLGILPSSSVLI   | I                | LAARLVFLARRHAVAS |    |    |
| 72_7846  | MECPAD | ADRVFGPAI                    | QGCRSDFDFTLLFQDSVLGILPSSSVLI   | I                | LAARLVFLARRHAVAS |    |    |
| 73_10528 | MECPAD | ADRVFGPAI                    | QGCRSDFDFTLLFQDSVLGILPSSSVLI   | I                | LAARLVFLARRHAVAS |    |    |
| 74_4899  | MECPAD | ADRVFGPAI                    | QGCRSDFDFTLLFQDSVLGILPSSSVLI   | I                | LAARLVFLARRHAVAS |    |    |
| 75_5507  | MECPAD | ADRVFGPAI                    | QGCRSDFDFTLLFQDSVLGILPSSSVLI   | I                | LAARLVFLARRHAVAS |    |    |
| 76_5432  | MECPAD | ADRVFGPAI                    | QGCRSDFDFTLLFQDSVLGILPSSSVLI   | I                | LAARLVFLARRHAVAS |    |    |
| 77_10770 | MECPAD | ADRVFGPAI                    | QGCRSDFDFTLLFQDSVLGILPSSSVLI   | I                | LAARLVFLARRHAVAS |    |    |
| 78_5904  | MECPAD | ADRVFGPAI                    | QGCRSDFDFTLLFQDSVLGILPSSSVLI   | I                | LAARLVFLARRHAVAS |    |    |
| 79_9653  | MECPAD | ADRVFGPAI                    | QGCRSDFDFTLLFQDSVLGILPSSSVLI   | I                | LAARLVFLARRHAVAS |    |    |
| 80_4462  | MECPAD | ADRVFGPAI                    | QGCRSDFDFTLLFQDSVLGILPSSSVLI   | I                | LAARLVFLARRHAVAS |    |    |
| 81_7194  | MECPAD | ADRVFGPAI                    | QGCRSDFDFTLLFQDSVLGILPSSSVLI   | I                | LAARLVFLARRHAVAS |    |    |
| 82_1022  | MECPAD | ADRVFGPAI                    | QGCRSDFDFTLLFQDSVLGILPSSSVLI   | I                | LAARLVFLARRHAVAS |    |    |
| 83_9813  | MECPAD | ADRVFGPAI                    | QGCRSDFDFTLLFQDSVLGILPSSSVLI   | I                | LAARLVFLARRHAVAS |    |    |
| 84_1902  | MECPAD | ADRVFGPAI                    | QGCRSDFDFTLLFQDSVLGILPSSSVLI   | I                | LAARLVFLARRHAVAS |    |    |
| 85_5152  | MECPAD | ADRVFGPAI                    | QGCRSDFDFTLLFQDSVLGILPSSSVLI   | I                | LAARLVFLARRHAVAS |    |    |
| 86_3385  | MECPAD | ADRVFGPAI                    | QGCRSDFDFTLLFQDSVLGILPSSSVLI   | I                | LAARLVFLARRHAVAS |    |    |
| 87_10760 | MECPAD | ADRVFGPAI                    | QGCRSDFDFTLLFQDSVLGILPSSSVLI   | I                | LAARLVFLARRHAVAS |    |    |
| 88_1588  | MECPAD | ADRVFGPAI                    | QGCRSDFDFTLLFQDSVLGILPSSSVLI   | I                | LAARLVFLARRHAVAS |    |    |
| 89_1609  | MECPAD | ADRVFGPAI                    | QGCRSDFDFTLLFQDSVLGILPSSSVLI   | I                | LAARLVFLARRHAVAS |    |    |
| 90_4023  | MECPAD | ADRVFGPAI                    | QGCRSDFDFTLLFQDSVLGILPSSSVLI   | I                | LAARLVFLARRHAVAS |    |    |

|          | 70     | 80      | 90     | 100     | 110    | 120     |
|----------|--------|---------|--------|---------|--------|---------|
| 1_4160   | LNWLYH | SKIGFNI | LSFALQ | LTLVQRC | RIQDLE | TSAAIPW |
| 2_6143   | LNWLYH | SKIGFNI | LSFALQ | LTLVQRC | RIQDLE | TSAAIPW |
| 3_6554   | LNWLYH | SKIGFNI | LSFALQ | LTLVQRC | RIQDLE | TSAAIPW |
| 4_111    | LNWLYH | SKIGFNI | LSFALQ | LTLVQRC | RIQDLE | TSAAIPW |
| 5_5742   | LNWLYH | SKIGFNI | LSFALQ | LTLVQRC | RIQDLE | TSAAIPW |
| 6_9490   | LNWLYH | SKIGFNI | LSFALQ | LTLVQRC | RIQDLE | TSAAIPW |
| 7_6313   | FAAYIG | VNGDD   | ENLDS  | ATMFSS  | LVLSL  | IGSPLV  |
| 8_2552   | LNWLYH | SKIGFNI | LSFALQ | LTLVQRC | RIQDLE | TSAAIPW |
| 9_7745   | LNWLYH | SKIGFNI | LSFALQ | LTLVQRC | RIQDLE | TSAAIPW |
| 10_2315  | LNWLYH | SKIGFNI | LSFALQ | LTLVQRC | RIQDLE | TSAAIPW |
| 11_2035  | LNWLYH | SKIGFNI | LSFALQ | LTLVQRC | RIQDLE | TSAAIPW |
| 12_9640  | LNWLYH | SKIGFNI | LSFALQ | LTLVQRC | RIQDLE | TSAAIPW |
| 13_3674  | LNWLYH | SKIGFNI | LSFALQ | LTLVQRC | RIQDLE | TSAAIPW |
| 14_6548  | LNWLYH | SKIGFNI | LSFALQ | LTLVQRC | RIQDLE | TSAAIPW |
| 15_10828 | LNWLYH | SKIGFNI | LSFALQ | LTLVQRC | RIQDLE | TSAAIPW |
| 16_6578  | LNWLYH | SKIGFNI | LSFALQ | LTLVQRC | RIQDLE | TSAAIPW |
| 17_10233 | LNWLYH | SKIGFNI | LSFALQ | LTLVQRC | RIQDLE | TSAAIPW |
| 18_9261  | LNWLYH | SKIGFNI | LSFALQ | LTLVQRC | RIQDLE | TSAAIPW |
| 19_8450  | LNWLYH | SKIGFNI | LSFALQ | LTLVQRC | RIQDLE | TSAAIPW |
| 20_1727  | LNWLYH | SKIGFNI | LSFALQ | LTLVQRC | RIQDLE | TSAAIPW |
| 21_206   | LNWLYH | SKIGFNI | LSFALQ | LTLVQRC | RIQDLE | TSAAIPW |
| 22_7439  | LNWLYH | SKIGFNI | LSFALQ | LTLVQRC | RIQDLE | TSAAIPW |
| 23_3780  | LNWLYH | SKIGFNI | LSFALQ | LTLVQRC | RIQDLE | TSAAIPW |
| 24_967   | LNWLYH | SKIGFNI | LSFALQ | LTLVQRC | RIQDLE | TSAAIPW |
| 25_6595  | LNWLYH | SKIGFNI | LSFALQ | LTLVQRC | RIQDLE | TSAAIPW |
| 26_8391  | LNWLYH | SKIGFNI | LSFALQ | LTLVQRC | RIQDLE | TSAAIPW |
| 27_8170  | LNWLYH | SKIGFNI | LSFALQ | LTLVQRC | RIQDLE | TSAAIPW |
| 28_5209  | LNWLYH | SKIGFNI | LSFALQ | LTLVQRC | RIQDLE | TSAAIPW |
| 29_2181  | LNWLYH | SKIGFNI | LSFALQ | LTLVQRC | RIQDLE | TSAAIPW |
| 30_8564  | LNWLYH | SKIGFNI | LSFALQ | LTLVQRC | RIQDLE | TSAAIPW |
| 31_1582  | LNWLYH | SKIGFNI | LSFALQ | LTLVQRC | RIQDLE | TSAAIPW |
| 32_4537  | LNWLYH | SKIGFNI | LSFALQ | LTLVQRC | RIQDLE | TSAAIPW |
| 33_9418  | LNWLYH | SKIGFNI | LSFALQ | LTLVQRC | RIQDLE | TSAAIPW |
| 34_1782  | LNWLYH | SKIGFNI | LSFALQ | LTLVQRC | RIQDLE | TSAAIPW |
| 35_10360 | LNWLYH | SKIGFNI | LSFALQ | LTLVQRC | RIQDLE | TSAAIPW |
| 36_468   | LNWLYH | SKIGFNI | LSFALQ | LTLVQRC | RIQDLE | TSAAIPW |
| 37_4956  | LNWLYH | SKIGFNI | LSFALQ | LTLVQRC | RIQDLE | TSAAIPW |
| 38_4305  | LNWLYH | SKIGFNI | LSFALQ | LTLVQRC | RIQDLE | TSAAIPW |
| 39_4737  | LNWLYH | SKIGFNI | LSFALQ | LTLVQRC | RIQDLE | TSAAIPW |
| 40_9543  | LNWLYH | SKIGFNI | LSFALQ | LTLVQRC | RIQDLE | TSAAIPW |
| 41_6669  | LNWLYH | SKIGFNI | LSFALQ | LTLVQRC | RIQDLE | TSAAIPW |
| 42_10558 | LNWLYH | SKIGFNI | LSFALQ | LTLVQRC | RIQDLE | TSAAIPW |
| 43_8051  | LNWLYH | SKIGFNI | LSFALQ | LTLVQRC | RIQDLE | TSAAIPW |
| 44_10454 | LNWLYH | SKIGFNI | LSFALQ | LTLVQRC | RIQDLE | TSAAIPW |
| 45_10126 | LNWLYH | SKIGFNI | LSFALQ | LTLVQRC | RIQDLE | TSAAIPW |
| 46_1547  | LNWLYH | SKIGFNI | LSFALQ | LTLVQRC | RIQDLE | TSAAIPW |
| 47_6749  | LNWLYH | SKIGFNI | LSFALQ | LTLVQRC | RIQDLE | TSAAIPW |
| 48_9982  | LNWLYH | SKIGFNI | LSFALQ | LTLVQRC | RIQDLE | TSAAIPW |
| 49_7293  | LNWLYH | SKIGFNI | LSFALQ | LTLVQRC | RIQDLE | TSAAIPW |
| 50_5993  | LNWLYH | SKIGFNI | LSFALQ | LTLVQRC | RIQDLE | TSAAIPW |
| 51_4791  | LNWLYH | SKIGFNI | LSFALQ | LTLVQRC | RIQDLE | TSAAIPW |
| 52_121   | LNWLYH | SKIGFNI | LSFALQ | LTLVQRC | RIQDLE | TSAAIPW |
| 53_1667  | LNWLYH | SKIGFNI | LSFALQ | LTLVQRC | RIQDLE | TSAAIPW |
| 54_10488 | LNWLYH | SKIGFNI | LSFALQ | LTLVQRC | RIQDLE | TSAAIPW |
| 55_7733  | LNWLYH | SKIGFNI | LSFALQ | LTLVQRC | RIQDLE | TSAAIPW |
| 56_3982  | LNWLYH | SKIGFNI | LSFALQ | LTLVQRC | RIQDLE | TSAAIPW |
| 57_392   | LNWLYH | SKIGFNI | LSFALQ | LTLVQRC | RIQDLE | TSAAIPW |
| 58_10291 | LNWLYH | SKIGFNI | LSFALQ | LTLVQRC | RIQDLE | TSAAIPW |
| 59_5792  | LNWLYH | SKIGFNI | LSFALQ | LTLVQRC | RIQDLE | TSAAIPW |
| 60_8712  | LNWLYH | SKIGFNI | LSFALQ | LTLVQRC | RIQDLE | TSAAIPW |
| 61_6716  | LNWLYH | SKIGFNI | LSFALQ | LTLVQRC | RIQDLE | TSAAIPW |
| 62_5599  | LNWLYH | SKIGFNI | LSFALQ | LTLVQRC | RIQDLE | TSAAIPW |
| 63_304   | LNWLYH | SKIGFNI | LSFALQ | LTLVQRC | RIQDLE | TSAAIPW |
| 64_10473 | YLRSSK | QLRLLD  | LDWKAD | LHTAFG  | ETTAGL | SVIRANG |
| 65_6310  | LNWLYH | SKIGFNI | LSFALQ | LTLVQRC | RIQDLE | TSAAIPW |
| 66_8714  | LNWLYH | SKIGFNI | LSFALQ | LTLVQRC | RIQDLE | TSAAIPW |
| 67_2350  | LNWLYH | SKIGFNI | LSFALQ | LTLVQRC | RIQDLE | TSAAIPW |
| 68_2447  | LNWLYH | SKIGFNI | LSFALQ | LTLVQRC | RIQDLE | TSAAIPW |
| 69_5658  | LNWLYH | SKIGFNI | LSFALQ | LTLVQRC | RIQDLE | TSAAIPW |
| 70_1277  | LNWLYH | SKIGFNI | LSFALQ | LTLVQRC | RIQDLE | TSAAIPW |
| 71_3717  | LNWLYH | SKIGFNI | LSFALQ | LTLVQRC | RIQDLE | TSAAIPW |
| 72_7846  | LNWLYH | SKIGFNI | LSFALQ | LTLVQRC | RIQDLE | TSAAIPW |
| 73_10528 | LNWLYH | SKIGFNI | LSFALQ | LTLVQRC | RIQDLE | TSAAIPW |
| 74_4899  | LNWLYH | SKIGFNI | LSFALQ | LTLVQRC | RIQDLE | TSAAIPW |
| 75_5507  | LNWLYH | SKIGFNI | LSFALQ | LTLVQRC | RIQDLE | TSAAIPW |
| 76_5432  | LNWLYH | SKIGFNI | LSFALQ | LTLVQRC | RIQDLE | TSAAIPW |
| 77_10770 | LNWLYH | SKIGFNI | LSFALQ | LTLVQRC | RIQDLE | TSAAIPW |
| 78_5904  | LNWLYH | SKIGFNI | LSFALQ | LTLVQRC | RIQDLE | TSAAIPW |
| 79_9653  | LNWLYH | SKIGFNI | LSFALQ | LTLVQRC | RIQDLE | TSAAIPW |
| 80_4462  | LNWLYH | SKIGFNI | LSFALQ | LTLVQRC | RIQDLE | TSAAIPW |
| 81_7194  | LNWLYH | SKIGFNI | LSFALQ | LTLVQRC | RIQDLE | TSAAIPW |
| 82_1022  | LNWLYH | SKIGFNI | LSFALQ | LTLVQRC | RIQDLE | TSAAIPW |
| 83_9813  | LNWLYH | SKIGFNI | LSFALQ | LTLVQRC | RIQDLE | TSAAIPW |
| 84_1902  | LNWLYH | SKIGFNI | LSFALQ | LTLVQRC | RIQDLE | TSAAIPW |
| 85_5152  | LNWLYH | SKIGFNI | LSFALQ | LTLVQRC | RIQDLE | TSAAIPW |
| 86_3385  | LNWLYH | SKIGFNI | LSFALQ | LTLVQRC | RIQDLE | TSAAIPW |
| 87_10760 | LNWLYH | SKIGFNI | LSFALQ | LTLVQRC | RIQDLE | TSAAIPW |
| 88_1588  | LNWLYH | SKIGFNI | LSFALQ | LTLVQRC | RIQDLE | TSAAIPW |
| 89_1609  | LNWLYH | SKIGFNI | LSFALQ | LTLVQRC | RIQDLE | TSAAIPW |
| 90_4023  | LNWLYH | SKIGFNI | LSFALQ | LTLVQRC | RIQDLE | TSAAIPW |

|          | 130             | 140    | 150           | 160   | 170    | 180          |
|----------|-----------------|--------|---------------|-------|--------|--------------|
| 1_4160   | RSARPSSLIVAYLFI | FIVL   | TEATRARTYYLKR | QTVAA | SITAA  | NCCVKFVLLI   |
| 2_6143   | RSARPSSLIVAYLFI | FIVL   | TEATRARTYYLKR | QTVAA | SITAA  | NCCVKFVLLI   |
| 3_6554   | RSARPSSLIVAYLFI | FIVL   | TEATRARTYYLKR | QTVAA | SITAA  | NCCVKFVLLI   |
| 4_111    | RSARPSSLIVAYLFI | FIVL   | TEATRARTYYLKR | QTVAA | SITAA  | NCCVKFVLLI   |
| 5_5742   | RSARPSSLIVAYLFI | FIVL   | TEATRARTYYLKR | QTVAA | SITAA  | NCCVKFVLLI   |
| 6_9490   | RSARPSSLIVAYLFI | FIVL   | TEATRARTYYLKR | QTVAA | SITAA  | NCCVKFVLLI   |
| 7_6313   | EKPLVIKHKPEIIT  | TTCDE  | ETKNAHLQLSEI  | ETAL  | SIRNAS | IGWSPDEQPL   |
| 8_2552   | RSARPSSLIVAYLFI | FIVL   | TEATRARTYYLKR | QTVAA | SITAA  | NCCVKFVLLI   |
| 9_7745   | RSARPSSLIVAYLFI | FIVL   | TEATRARTYYLKR | QTVAA | SITAA  | NCCVKFVLLI   |
| 10_2315  | RSARPSSLIVAYLFI | FIVL   | TEATRARTYYLKR | QTVAA | SITAA  | NCCVKFVLLI   |
| 11_2035  | RSARPSSLIVAYLFI | FIVL   | TEATRARTYYLKR | QTVAA | SITAA  | NCCVKFVLLI   |
| 12_9640  | RSARPSSLIVAYLFI | FIVL   | TEATRARTYYLKR | QTVAA | SITAA  | NCCVKFVLLI   |
| 13_3674  | RSARPSSLIVAYLFI | FIVL   | TEATRARTYYLKR | QTVAA | SITAA  | NCCVKFVLLI   |
| 14_6548  | RSARPSSLIVAYLFI | FIVL   | TEATRARTYYLKR | QTVAA | SITAA  | NCCVKFVLLI   |
| 15_10828 | RSARPSSLIVAYLFI | FIVL   | TEATRARTYYLKR | QTVAA | SITAA  | NCCVKFVLLI   |
| 16_6578  | RSARPSSLIVAYLFI | FIVL   | TEATRARTYYLKR | QTVAA | SITAA  | NCCVKFVLLI   |
| 17_10233 | RSARPSSLIVAYLFI | FIVL   | TEATRARTYYLKR | QTVAA | SITAA  | NCCVKFVLLI   |
| 18_9261  | RSARPSSLIVAYLFI | FIVL   | TEATRARTYYLKR | QTVAA | SITAA  | NCCVKFVLLI   |
| 19_8450  | RSARPSSLIVAYLFI | FIVL   | TEATRARTYYLKR | QTVAA | SITAA  | NCCVKFVLLI   |
| 20_1727  | RSARPSSLIVAYLFI | FIVL   | TEATRARTYYLKR | QTVAA | SITAA  | NCCVKFVLLI   |
| 21_206   | RSARPSSLIVAYLFI | FIVL   | TEATRARTYYLKR | QTVAA | SITAA  | NCCVKFVLLI   |
| 22_7439  | RSARPSSLIVAYLFI | FIVL   | TEATRARTYYLKR | QTVAA | SITAA  | NCCVKFVLLI   |
| 23_3780  | RSARPSSLIVAYLFI | FIVL   | TEATRARTYYLKR | QTVAA | SITAA  | NCCVKFVLLI   |
| 24_967   | RSARPSSLIVAYLFI | FIVL   | TEATRARTYYLKR | QTVAA | SITAA  | NCCVKFVLLI   |
| 25_6595  | RSARPSSLIVAYLFI | FIVL   | TEATRARTYYLKR | QTVAA | SITAA  | NCCVKFVLLI   |
| 26_8391  | RSARPSSLIVAYLFI | FIVL   | TEATRARTYYLKR | QTVAA | SITAA  | NCCVKFVLLI   |
| 27_8170  | RSARPSSLIVAYLFI | FIVL   | TEATRARTYYLKR | QTVAA | SITAA  | NCCVKFVLLI   |
| 28_5209  | RSARPSSLIVAYLFI | FIVL   | TEATRARTYYLKR | QTVAA | SITAA  | NCCVKFVLLI   |
| 29_2181  | RSARPSSLIVAYLFI | FIVL   | TEATRARTYYLKR | QTVAA | SITAA  | NCCVKFVLLI   |
| 30_8564  | RSARPSSLIVAYLFI | FIVL   | TEATRARTYYLKR | QTVAA | SITAA  | NCCVKFVLLI   |
| 31_1582  | RSARPSSLIVAYLFI | FIVL   | TEATRARTYYLKR | QTVAA | SITAA  | NCCVKFVLLI   |
| 32_4537  | RSARPSSLIVAYLFI | FIVL   | TEATRARTYYLKR | QTVAA | SITAA  | NCCVKFVLLI   |
| 33_9418  | RSARPSSLIVAYLFI | FIVL   | TEATRARTYYLKR | QTVAA | SITAA  | NCCVKFVLLI   |
| 34_1782  | RSARPSSLIVAYLFI | FIVL   | TEATRARTYYLKR | QTVAA | SITAA  | NCCVKFVLLI   |
| 35_10360 | RSARPSSLIVAYLFI | FIVL   | TEATRARTYYLKR | QTVAA | SITAA  | NCCVKFVLLI   |
| 36_468   | RSARPSSLIVAYLFI | FIVL   | TEATRARTYYLKR | QTVAA | SITAA  | NCCVKFVLLI   |
| 37_4956  | RSARPSSLIVAYLFI | FIVL   | TEATRARTYYLKR | QTVAA | SITAA  | NCCVKFVLLI   |
| 38_4305  | RSARPSSLIVAYLFI | FIVL   | TEATRARTYYLKR | QTVAA | SITAA  | NCCVKFVLLI   |
| 39_4737  | RSARPSSLIVAYLFI | FIVL   | TEATRARTYYLKR | QTVAA | SITAA  | NCCVKFVLLI   |
| 40_9543  | RSARPSSLIVAYLFI | FIVL   | TEATRARTYYLKR | QTVAA | SITAA  | NCCVKFVLLI   |
| 41_6669  | RSARPSSLIVAYLFI | FIVL   | TEATRARTYYLKR | QTVAA | SITAA  | NCCVKFVLLI   |
| 42_10558 | RSARPSSLIVAYLFI | FIVL   | TEATRARTYYLKR | QTVAA | SITAA  | NCCVKFVLLI   |
| 43_8051  | RSARPSSLIVAYLFI | FIVL   | TEATRARTYYLKR | QTVAA | SITAA  | NCCVKFVLLI   |
| 44_10454 | RSARPSSLIVAYLFI | FIVL   | TEATRARTYYLKR | QTVAA | SITAA  | NCCVKFVLLI   |
| 45_10126 | RSARPSSLIVAYLFI | FIVL   | TEATRARTYYLKR | QTVAA | SITAA  | NCCVKFVLLI   |
| 46_1547  | RSARPSSLIVAYLFI | FIVL   | TEATRARTYYLKR | QTVAA | SITAA  | NCCVKFVLLI   |
| 47_6749  | RSARPSSLIVAYLFI | FIVL   | TEATRARTYYLKR | QTVAA | SITAA  | NCCVKFVLLI   |
| 48_9982  | RSARPSSLIVAYLFI | FIVL   | TEATRARTYYLKR | QTVAA | SITAA  | NCCVKFVLLI   |
| 49_7293  | RSARPSSLIVAYLFI | FIVL   | TEATRARTYYLKR | QTVAA | SITAA  | NCCVKFVLLI   |
| 50_5993  | RSARPSSLIVAYLFI | FIVL   | TEATRARTYYLKR | QTVAA | SITAA  | NCCVKFVLLI   |
| 51_4791  | RSARPSSLIVAYLFI | FIVL   | TEATRARTYYLKR | QTVAA | SITAA  | NCCVKFVLLI   |
| 52_121   | RSARPSSLIVAYLFI | FIVL   | TEATRARTYYLKR | QTVAA | SITAA  | NCCVKFVLLI   |
| 53_1667  | RSARPSSLIVAYLFI | FIVL   | TEATRARTYYLKR | QTVAA | SITAA  | NCCVKFVLLI   |
| 54_10488 | RSARPSSLIVAYLFI | FIVL   | TEATRARTYYLKR | QTVAA | SITAA  | NCCVKFVLLI   |
| 55_7733  | RSARPSSLIVAYLFI | FIVL   | TEATRARTYYLKR | QTVAA | SITAA  | NCCVKFVLLI   |
| 56_3982  | RSARPSSLIVAYLFI | FIVL   | TEATRARTYYLKR | QTVAA | SITAA  | NCCVKFVLLI   |
| 57_392   | RSARPSSLIVAYLFI | FIVL   | TEATRARTYYLKR | QTVAA | SITAA  | NCCVKFVLLI   |
| 58_10291 | RSARPSSLIVAYLFI | FIVL   | TEATRARTYYLKR | QTVAA | SITAA  | NCCVKFVLLI   |
| 59_5792  | RSARPSSLIVAYLFI | FIVL   | TEATRARTYYLKR | QTVAA | SITAA  | NCCVKFVLLI   |
| 60_8712  | RSARPSSLIVAYLFI | FIVL   | TEATRARTYYLKR | QTVAA | SITAA  | NCCVKFVLLI   |
| 61_6716  | RSARPSSLIVAYLFI | FIVL   | TEATRARTYYLKR | QTVAA | SITAA  | NCCVKFVLLI   |
| 62_5599  | RSARPSSLIVAYLFI | FIVL   | TEATRARTYYLKR | QTVAA | SITAA  | NCCVKFVLLI   |
| 63_304   | RSARPSSLIVAYLFI | FIVL   | TEATRARTYYLKR | QTVAA | SITAA  | NCCVKFVLLI   |
| 64_10473 | YMQRWLQLVLNLV   | VAGLAI | AGVAGL        | RDVAA | GAVG   | VALLNNTTLGET |
| 65_6310  | RSARPSSLIVAYLFI | FIVL   | TEATRARTYYLKR | QTVAA | SITAA  | NCCVKFVLLI   |
| 66_8714  | RSARPSSLIVAYLFI | FIVL   | TEATRARTYYLKR | QTVAA | SITAA  | NCCVKFVLLI   |
| 67_2350  | RSARPSSLIVAYLFI | FIVL   | TEATRARTYYLKR | QTVAA | SITAA  | NCCVKFVLLI   |
| 68_2447  | RSARPSSLIVAYLFI | FIVL   | TEATRARTYYLKR | QTVAA | SITAA  | NCCVKFVLLI   |
| 69_5658  | RSARPSSLIVAYLFI | FIVL   | TEATRARTYYLKR | QTVAA | SITAA  | NCCVKFVLLI   |
| 70_1277  | RSARPSSLIVAYLFI | FIVL   | TEATRARTYYLKR | QTVAA | SITAA  | NCCVKFVLLI   |
| 71_3717  | RSARPSSLIVAYLFI | FIVL   | TEATRARTYYLKR | QTVAA | SITAA  | NCCVKFVLLI   |
| 72_7846  | RSARPSSLIVAYLFI | FIVL   | TEATRARTYYLKR | QTVAA | SITAA  | NCCVKFVLLI   |
| 73_10528 | RSARPSSLIVAYLFI | FIVL   | TEATRARTYYLKR | QTVAA | SITAA  | NCCVKFVLLI   |
| 74_4899  | RSARPSSLIVAYLFI | FIVL   | TEATRARTYYLKR | QTVAA | SITAA  | NCCVKFVLLI   |
| 75_5507  | RSARPSSLIVAYLFI | FIVL   | TEATRARTYYLKR | QTVAA | SITAA  | NCCVKFVLLI   |
| 76_5432  | RSARPSSLIVAYLFI | FIVL   | TEATRARTYYLKR | QTVAA | SITAA  | NCCVKFVLLI   |
| 77_10770 | RSARPSSLIVAYLFI | FIVL   | TEATRARTYYLKR | QTVAA | SITAA  | NCCVKFVLLI   |
| 78_5904  | RSARPSSLIVAYLFI | FIVL   | TEATRARTYYLKR | QTVAA | SITAA  | NCCVKFVLLI   |
| 79_9653  | RSARPSSLIVAYLFI | FIVL   | TEATRARTYYLKR | QTVAA | SITAA  | NCCVKFVLLI   |
| 80_4462  | RSARPSSLIVAYLFI | FIVL   | TEATRARTYYLKR | QTVAA | SITAA  | NCCVKFVLLI   |
| 81_7194  | RSARPSSLIVAYLFI | FIVL   | TEATRARTYYLKR | QTVAA | SITAA  | NCCVKFVLLI   |
| 82_1022  | RSARPSSLIVAYLFI | FIVL   | TEATRARTYYLKR | QTVAA | SITAA  | NCCVKFVLLI   |
| 83_9813  | RSARPSSLIVAYLFI | FIVL   | TEATRARTYYLKR | QTVAA | SITAA  | NCCVKFVLLI   |
| 84_1902  | RSARPSSLIVAYLFI | FIVL   | TEATRARTYYLKR | QTVAA | SITAA  | NCCVKFVLLI   |
| 85_5152  | RSARPSSLIVAYLFI | FIVL   | TEATRARTYYLKR | QTVAA | SITAA  | NCCVKFVLLI   |
| 86_3385  | RSARPSSLIVAYLFI | FIVL   | TEATRARTYYLKR | QTVAA | SITAA  | NCCVKFVLLI   |
| 87_10760 | RSARPSSLIVAYLFI | FIVL   | TEATRARTYYLKR | QTVAA | SITAA  | NCCVKFVLLI   |
| 88_1588  | RSARPSSLIVAYLFI | FIVL   | TEATRARTYYLKR | QTVAA | SITAA  | NCCVKFVLLI   |
| 89_1609  | RSARPSSLIVAYLFI | FIVL   | TEATRARTYYLKR | QTVAA | SITAA  | NCCVKFVLLI   |
| 90_4023  | RSARPSSLIVAYLFI | FIVL   | TEATRARTYYLKR | QTVAA | SITAA  | NCCVKFVLLI   |

|          | 190                   | 200                  | 210                    | 220 | 230 | 240 |
|----------|-----------------------|----------------------|------------------------|-----|-----|-----|
| 1_4160   | SGSDGSRKKAASEDLAGPTNQ | TFFLWLNRLFLTGYRRAFT  | TTTDLLELISSPLYVKSIRAQF |     |     |     |
| 2_6143   | SGSDGSRKKAASEDLAGPTNQ | TFFLWLNRLFLTGYRRAFT  | TTTDLLELISSPLYVKSIRAQF |     |     |     |
| 3_6554   | SGSDGSRKKAASEDLAGPTNQ | TFFLWLNRLFLTGYRRAFT  | TTTDLLELISSPLYVKSIRAQF |     |     |     |
| 4_111    | SGSDGSRKKAASEDLAGPTNQ | TFFLWLNRLFLTGYRRAFT  | TTTDLLELISSPLYVKSIRAQF |     |     |     |
| 5_5742   | SGSDGSRKKAASEDLAGPTNQ | TFFLWLNRLFLTGYRRAFT  | TTTDLLELISSPLYVKSIRAQF |     |     |     |
| 6_9490   | SGSDGSRKKAASEDLAGPTNQ | TFFLWLNRLFLTGYRRAFT  | TTTDLLELISSPLYVKSIRAQF |     |     |     |
| 7_6313   | KGSFVALVGKTGSGKSLLKST | IGEGGHVSGSIIHIPLDKVA | AGRIGSGGSRLSGGQKQRL    |     |     |     |
| 8_2552   | SGSDGSRKKAASEDLAGPTNQ | TFFLWLNRLFLTGYRRAFT  | TTTDLLELISSPLYVKSIRAQF |     |     |     |
| 9_7745   | SGSDGSRKKAASEDLAGPTNQ | TFFLWLNRLFLTGYRRAFT  | TTTDLLELISSPLYVKSIRAQF |     |     |     |
| 10_2315  | SGSDGSRKKAASEDLAGPTNQ | TFFLWLNRLFLTGYRRAFT  | TTTDLLELISSPLYVKSIRAQF |     |     |     |
| 11_2035  | SGSDGSRKKAASEDLAGPTNQ | TFFLWLNRLFLTGYRRAFT  | TTTDLLELISSPLYVKSIRAQF |     |     |     |
| 12_9640  | SGSDGSRKKAASEDLAGPTNQ | TFFLWLNRLFLTGYRRAFT  | TTTDLLELISSPLYVKSIRAQF |     |     |     |
| 13_3674  | SGSDGSRKKAASEDLAGPTNQ | TFFLWLNRLFLTGYRRAFT  | TTTDLLELISSPLYVKSIRAQF |     |     |     |
| 14_6548  | SGSDGSRKKAASEDLAGPTNQ | TFFLWLNRLFLTGYRRAFT  | TTTDLLELISSPLYVKSIRAQF |     |     |     |
| 15_10828 | SGSDGSRKKAASEDLAGPTNQ | TFFLWLNRLFLTGYRRAFT  | TTTDLLELISSPLYVKSIRAQF |     |     |     |
| 16_6578  | SGSDGSRKKAASEDLAGPTNQ | TFFLWLNRLFLTGYRRAFT  | TTTDLLELISSPLYVKSIRAQF |     |     |     |
| 17_10233 | SGSDGSRKKAASEDLAGPTNQ | TFFLWLNRLFLTGYRRAFT  | TTTDLLELISSPLYVKSIRAQF |     |     |     |
| 18_9261  | SGSDGSRKKAASEDLAGPTNQ | TFFLWLNRLFLTGYRRAFT  | TTTDLLELISSPLYVKSIRAQF |     |     |     |
| 19_8450  | SGSDGSRKKAASEDLAGPTNQ | TFFLWLNRLFLTGYRRAFT  | TTTDLLELISSPLYVKSIRAQF |     |     |     |
| 20_1727  | SGSDGSRKKAASEDLAGPTNQ | TFFLWLNRLFLTGYRRAFT  | TTTDLLELISSPLYVKSIRAQF |     |     |     |
| 21_206   | SGSDGSRKKAASEDLAGPTNQ | TFFLWLNRLFLTGYRRAFT  | TTTDLLELISSPLYVKSIRAQF |     |     |     |
| 22_7439  | SGSDGSRKKAASEDLAGPTNQ | TFFLWLNRLFLTGYRRAFT  | TTTDLLELISSPLYVKSIRAQF |     |     |     |
| 23_3780  | SGSDGSRKKAASEDLAGPTNQ | TFFLWLNRLFLTGYRRAFT  | TTTDLLELISSPLYVKSIRAQF |     |     |     |
| 24_967   | SGSDGSRKKAASEDLAGPTNQ | TFFLWLNRLFLTGYRRAFT  | TTTDLLELISSPLYVKSIRAQF |     |     |     |
| 25_6595  | SGSDGSRKKAASEDLAGPTNQ | TFFLWLNRLFLTGYRRAFT  | TTTDLLELISSPLYVKSIRAQF |     |     |     |
| 26_8391  | SGSDGSRKKAASEDLAGPTNQ | TFFLWLNRLFLTGYRRAFT  | TTTDLLELISSPLYVKSIRAQF |     |     |     |
| 27_8170  | SGSDGSRKKAASEDLAGPTNQ | TFFLWLNRLFLTGYRRAFT  | TTTDLLELISSPLYVKSIRAQF |     |     |     |
| 28_5209  | SGSDGSRKKAASEDLAGPTNQ | TFFLWLNRLFLTGYRRAFT  | TTTDLLELISSPLYVKSIRAQF |     |     |     |
| 29_2181  | SGSDGSRKKAASEDLAGPTNQ | TFFLWLNRLFLTGYRRAFT  | TTTDLLELISSPLYVKSIRAQF |     |     |     |
| 30_8564  | SGSDGSRKKAASEDLAGPTNQ | TFFLWLNRLFLTGYRRAFT  | TTTDLLELISSPLYVKSIRAQF |     |     |     |
| 31_1582  | SGSDGSRKKAASEDLAGPTNQ | TFFLWLNRLFLTGYRRAFT  | TTTDLLELISSPLYVKSIRAQF |     |     |     |
| 32_4537  | SGSDGSRKKAASEDLAGPTNQ | TFFLWLNRLFLTGYRRAFT  | TTTDLLELISSPLYVKSIRAQF |     |     |     |
| 33_9418  | SGSDGSRKKAASEDLAGPTNQ | TFFLWLNRLFLTGYRRAFT  | TTTDLLELISSPLYVKSIRAQF |     |     |     |
| 34_1782  | SGSDGSRKKAASEDLAGPTNQ | TFFLWLNRLFLTGYRRAFT  | TTTDLLELISSPLYVKSIRAQF |     |     |     |
| 35_10360 | SGSDGSRKKAASEDLAGPTNQ | TFFLWLNRLFLTGYRRAFT  | TTTDLLELISSPLYVKSIRAQF |     |     |     |
| 36_468   | SGSDGSRKKAASEDLAGPTNQ | TFFLWLNRLFLTGYRRAFT  | TTTDLLELISSPLYVKSIRAQF |     |     |     |
| 37_4956  | SGSDGSRKKAASEDLAGPTNQ | TFFLWLNRLFLTGYRRAFT  | TTTDLLELISSPLYVKSIRAQF |     |     |     |
| 38_4305  | SGSDGSRKKAASEDLAGPTNQ | TFFLWLNRLFLTGYRRAFT  | TTTDLLELISSPLYVKSIRAQF |     |     |     |
| 39_4737  | SGSDGSRKKAASEDLAGPTNQ | TFFLWLNRLFLTGYRRAFT  | TTTDLLELISSPLYVKSIRAQF |     |     |     |
| 40_9543  | SGSDGSRKKAASEDLAGPTNQ | TFFLWLNRLFLTGYRRAFT  | TTTDLLELISSPLYVKSIRAQF |     |     |     |
| 41_6669  | SGSDGSRKKAASEDLAGPTNQ | TFFLWLNRLFLTGYRRAFT  | TTTDLLELISSPLYVKSIRAQF |     |     |     |
| 42_10558 | SGSDGSRKKAASEDLAGPTNQ | TFFLWLNRLFLTGYRRAFT  | TTTDLLELISSPLYVKSIRAQF |     |     |     |
| 43_8051  | SGSDGSRKKAASEDLAGPTNQ | TFFLWLNRLFLTGYRRAFT  | TTTDLLELISSPLYVKSIRAQF |     |     |     |
| 44_10454 | SGSDGSRKKAASEDLAGPTNQ | TFFLWLNRLFLTGYRRAFT  | TTTDLLELISSPLYVKSIRAQF |     |     |     |
| 45_10126 | SGSDGSRKKAASEDLAGPTNQ | TFFLWLNRLFLTGYRRAFT  | TTTDLLELISSPLYVKSIRAQF |     |     |     |
| 46_1547  | SGSDGSRKKAASEDLAGPTNQ | TFFLWLNRLFLTGYRRAFT  | TTTDLLELISSPLYVKSIRAQF |     |     |     |
| 47_6749  | SGSDGSRKKAASEDLAGPTNQ | TFFLWLNRLFLTGYRRAFT  | TTTDLLELISSPLYVKSIRAQF |     |     |     |
| 48_9982  | SGSDGSRKKAASEDLAGPTNQ | TFFLWLNRLFLTGYRRAFT  | TTTDLLELISSPLYVKSIRAQF |     |     |     |
| 49_7293  | SGSDGSRKKAASEDLAGPTNQ | TFFLWLNRLFLTGYRRAFT  | TTTDLLELISSPLYVKSIRAQF |     |     |     |
| 50_5993  | SGSDGSRKKAASEDLAGPTNQ | TFFLWLNRLFLTGYRRAFT  | TTTDLLELISSPLYVKSIRAQF |     |     |     |
| 51_4791  | SGSDGSRKKAASEDLAGPTNQ | TFFLWLNRLFLTGYRRAFT  | TTTDLLELISSPLYVKSIRAQF |     |     |     |
| 52_121   | SGSDGSRKKAASEDLAGPTNQ | TFFLWLNRLFLTGYRRAFT  | TTTDLLELISSPLYVKSIRAQF |     |     |     |
| 53_1667  | SGSDGSRKKAASEDLAGPTNQ | TFFLWLNRLFLTGYRRAFT  | TTTDLLELISSPLYVKSIRAQF |     |     |     |
| 54_10488 | SGSDGSRKKAASEDLAGPTNQ | TFFLWLNRLFLTGYRRAFT  | TTTDLLELISSPLYVKSIRAQF |     |     |     |
| 55_7733  | SGSDGSRKKAASEDLAGPTNQ | TFFLWLNRLFLTGYRRAFT  | TTTDLLELISSPLYVKSIRAQF |     |     |     |
| 56_3982  | SGSDGSRKKAASEDLAGPTNQ | TFFLWLNRLFLTGYRRAFT  | TTTDLLELISSPLYVKSIRAQF |     |     |     |
| 57_392   | SGSDGSRKKAASEDLAGPTNQ | TFFLWLNRLFLTGYRRAFT  | TTTDLLELISSPLYVKSIRAQF |     |     |     |
| 58_10291 | SGSDGSRKKAASEDLAGPTNQ | TFFLWLNRLFLTGYRRAFT  | TTTDLLELISSPLYVKSIRAQF |     |     |     |
| 59_5792  | SGSDGSRKKAASEDLAGPTNQ | TFFLWLNRLFLTGYRRAFT  | TTTDLLELISSPLYVKSIRAQF |     |     |     |
| 60_8712  | SGSDGSRKKAASEDLAGPTNQ | TFFLWLNRLFLTGYRRAFT  | TTTDLLELISSPLYVKSIRAQF |     |     |     |
| 61_6716  | SGSDGSRKKAASEDLAGPTNQ | TFFLWLNRLFLTGYRRAFT  | TTTDLLELISSPLYVKSIRAQF |     |     |     |
| 62_5599  | SGSDGSRKKAASEDLAGPTNQ | TFFLWLNRLFLTGYRRAFT  | TTTDLLELISSPLYVKSIRAQF |     |     |     |
| 63_304   | SGSDGSRKKAASEDLAGPTNQ | TFFLWLNRLFLTGYRRAFT  | TTTDLLELISSPLYVKSIRAQF |     |     |     |
| 64_10473 | SLETSIGAIA RVCTFEQDTP | PREREESTDLPDNRPGAGQ  | ISFENWATYEDEGCGSNWG    |     |     |     |
| 65_6310  | SGSDGSRKKAASEDLAGPTNQ | TFFLWLNRLFLTGYRRAFT  | TTTDLLELISSPLYVKSIRAQF |     |     |     |
| 66_8714  | SGSDGSRKKAASEDLAGPTNQ | TFFLWLNRLFLTGYRRAFT  | TTTDLLELISSPLYVKSIRAQF |     |     |     |
| 67_2350  | SGSDGSRKKAASEDLAGPTNQ | TFFLWLNRLFLTGYRRAFT  | TTTDLLELISSPLYVKSIRAQF |     |     |     |
| 68_2447  | SGSDGSRKKAASEDLAGPTNQ | TFFLWLNRLFLTGYRRAFT  | TTTDLLELISSPLYVKSIRAQF |     |     |     |
| 69_5658  | SGSDGSRKKAASEDLAGPTNQ | TFFLWLNRLFLTGYRRAFT  | TTTDLLELISSPLYVKSIRAQF |     |     |     |
| 70_1277  | SGSDGSRKKAASEDLAGPTNQ | TFFLWLNRLFLTGYRRAFT  | TTTDLLELISSPLYVKSIRAQF |     |     |     |
| 71_3717  | SGSDGSRKKAASEDLAGPTNQ | TFFLWLNRLFLTGYRRAFT  | TTTDLLELISSPLYVKSIRAQF |     |     |     |
| 72_7846  | SGSDGSRKKAASEDLAGPTNQ | TFFLWLNRLFLTGYRRAFT  | TTTDLLELISSPLYVKSIRAQF |     |     |     |
| 73_10528 | SGSDGSRKKAASEDLAGPTNQ | TFFLWLNRLFLTGYRRAFT  | TTTDLLELISSPLYVKSIRAQF |     |     |     |
| 74_4899  | SSSDGSRKKAASEDLAGPTNQ | TFFLWLNRLFLTGYRRAFT  | TTTDLLELISSPLYVKSIRAQF |     |     |     |
| 75_5507  | SGSDGSRKKAASEDLAGPTNQ | TFFLWLNRLFLTGYRRAFT  | TTTDLLELISSPLYVKSIRAQF |     |     |     |
| 76_5432  | SGSDGSRKKAASEDLAGPTNQ | TFFLWLNRLFLTGYRRAFT  | TTTDLLELISSPLYVKSIRAQF |     |     |     |
| 77_10770 | SGSDGSRKKAASEDLAGPTNQ | TFFLWLNRLFLTGYRRAFT  | TTTDLLELISSPLYVKSIRAQF |     |     |     |
| 78_5904  | SGSDGSRKKAASEDLAGPTNQ | TFFLWLNRLFLTGYRRAFT  | TTTDLLELISSPLYVKSIRAQF |     |     |     |
| 79_9653  | SGSDGSRKKAASEDLAGPTNQ | TFFLWLNRLFLTGYRRAFT  | TTTDLLELISSPLYVKSIRAQF |     |     |     |
| 80_4462  | SGSDGSRKKAASEDLAGPTNQ | TFFLWLNRLFLTGYRRAFT  | TTTDLLELISSPLYVKSIRAQF |     |     |     |
| 81_7194  | SGSDGSRKKAASEDLAGPTNQ | TFFLWLNRLFLTGYRRAFT  | TTTDLLELISSPLYVKSIRAQF |     |     |     |
| 82_1022  | SGSDGSRKKAASEDLAGPTNQ | TFFLWLNRLFLTGYRRAFT  | TTTDLLELISSPLYVKSIRAQF |     |     |     |
| 83_9813  | SGSDGSRKKAASEDLAGPTNQ | TFFLWLNRLFLTGYRRAFT  | TTTDLLELISSPLYVKSIRAQF |     |     |     |
| 84_1902  | SGSDGSRKKAASEDLAGPTNQ | TFFLWLNRLFLTGYRRAFT  | TTTDLLELISSPLYVKSIRAQF |     |     |     |
| 85_5152  | SGSDGSRKKAASEDLAGPTNQ | TFFLWLNRLFLTGYRRAFT  | TTTDLLELISSPLYVKSIRAQF |     |     |     |
| 86_3385  | SGSDGSRKKAASEDLAGPTNQ | TFFLWLNRLFLTGYRRAFT  | TTTDLLELISSPLYVKSIRAQF |     |     |     |
| 87_10760 | SGSDGSRKKAASEDLAGPTNQ | TFFLWLNRLFLTGYRRAFT  | TTTDLLELISSPLYVKSIRAQF |     |     |     |
| 88_1588  | SGSDGSRKKAASEDLAGPTNQ | TFFLWLNRLFLTGYRRAFT  | TTTDLLELISSPLYVKSIRAQF |     |     |     |
| 89_1609  | SGSDGSRKKAASEDLAGPTNQ | TFFLWLNRLFLTGYRRAFT  | TTTDLLELISSPLYVKSIRAQF |     |     |     |
| 90_4023  | SGSDGSRKKAASEDLAGPTNQ | TFFLWLNRLFLTGYRRAFT  | TTTDLLELISSPLYVKSIRAQF |     |     |     |

|          | 250 | 260 | 270 | 280 | 290  | 300                       |
|----------|-----|-----|-----|-----|------|---------------------------|
| 1_4160   | HG  | MT  | NG  | QT  | ANGH | SLFSSSTNTFAL              |
| 2_6143   | Q   | AFT | SLG | SY  | AL   | APVIPRLAVTGFTFSQSFLVTALLD |
| 3_6554   | HG  | MT  | NG  | QT  | ANGH | SLFSSSTNTFAL              |
| 4_111    | Q   | AFT | SLG | SY  | AL   | APVIPRLAVTGFTFSQSFLVTALLD |
| 5_5742   | HG  | MT  | NG  | QT  | ANGH | SLFSSSTNTFAL              |
| 6_9490   | Q   | AFT | SLG | SY  | AL   | APVIPRLAVTGFTFSQSFLVTALLD |
| 7_6313   | Q   | DGF | SD  | PR  | GCC  | EDWEQQFYLP                |
| 8_2552   | Q   | AFT | SLG | SY  | AL   | APVIPRLAVTGFTFSQSFLVTALLD |
| 9_7745   | HG  | MT  | NG  | QT  | ANGH | SLFSSSTNTFAL              |
| 10_2315  | Q   | AFT | SLG | SY  | AL   | APVIPRLAVTGFTFSQSFLVTALLD |
| 11_2035  | HG  | MT  | NG  | QT  | ANGH | SLFSSSTNTFAL              |
| 12_9640  | Q   | AFT | SLG | SY  | AL   | APVIPRLAVTGFTFSQSFLVTALLD |
| 13_3674  | HG  | MT  | NG  | QT  | ANGH | SLFSSSTNTFAL              |
| 14_6548  | Q   | AFT | SLG | SY  | AL   | APVIPRLAVTGFTFSQSFLVTALLD |
| 15_10828 | HG  | MT  | NG  | QT  | ANGH | SLFSSSTNTFAL              |
| 16_6578  | Q   | AFT | SLG | SY  | AL   | APVIPRLAVTGFTFSQSFLVTALLD |
| 17_10233 | HG  | MT  | NG  | QT  | ANGH | SLFSSSTNTFAL              |
| 18_9261  | Q   | AFT | SLG | SY  | AL   | APVIPRLAVTGFTFSQSFLVTALLD |
| 19_8450  | HG  | MT  | NG  | QT  | ANGH | SLFSSSTNTFAL              |
| 20_1727  | Q   | AFT | SLG | SY  | AL   | APVIPRLAVTGFTFSQSFLVTALLD |
| 21_206   | HG  | MT  | NG  | QT  | ANGH | SLFSSSTNTFAL              |
| 22_7439  | Q   | AFT | SLG | SY  | AL   | APVIPRLAVTGFTFSQSFLVTALLD |
| 23_3780  | HG  | MT  | NG  | QT  | ANGH | SLFSSSTNTFAL              |
| 24_967   | Q   | AFT | SLG | SY  | AL   | APVIPRLAVTGFTFSQSFLVTALLD |
| 25_6595  | HG  | MT  | NG  | QT  | ANGH | SLFSSSTNTFAL              |
| 26_8391  | Q   | AFT | SLG | SY  | AL   | APVIPRLAVTGFTFSQSFLVTALLD |
| 27_8170  | HG  | MT  | NG  | QT  | ANGH | SLFSSSTNTFAL              |
| 28_5209  | Q   | AFT | SLG | SY  | AL   | APVIPRLAVTGFTFSQSFLVTALLD |
| 29_2181  | HG  | MT  | NG  | QT  | ANGH | SLFSSSTNTFAL              |
| 30_8564  | Q   | AFT | SLG | SY  | AL   | APVIPRLAVTGFTFSQSFLVTALLD |
| 31_1582  | HG  | MT  | NG  | QT  | ANGH | SLFSSSTNTFAL              |
| 32_4537  | Q   | AFT | SLG | SY  | AL   | APVIPRLAVTGFTFSQSFLVTALLD |
| 33_9418  | HG  | MT  | NG  | QT  | ANGH | SLFSSSTNTFAL              |
| 34_1782  | Q   | AFT | SLG | SY  | AL   | APVIPRLAVTGFTFSQSFLVTALLD |
| 35_10360 | HG  | MT  | NG  | QT  | ANGH | SLFSSSTNTFAL              |
| 36_468   | Q   | AFT | SLG | SY  | AL   | APVIPRLAVTGFTFSQSFLVTALLD |
| 37_4956  | HG  | MT  | NG  | QT  | ANGH | SLFSSSTNTFAL              |
| 38_4305  | Q   | AFT | SLG | SY  | AL   | APVIPRLAVTGFTFSQSFLVTALLD |
| 39_4737  | HG  | MT  | NG  | QT  | ANGH | SLFSSSTNTFAL              |
| 40_9543  | Q   | AFT | SLG | SY  | AL   | APVIPRLAVTGFTFSQSFLVTALLD |
| 41_6669  | HG  | MT  | NG  | QT  | ANGH | SLFSSSTNTFAL              |
| 42_10558 | Q   | AFT | SLG | SY  | AL   | APVIPRLAVTGFTFSQSFLVTALLD |
| 43_8051  | HG  | MT  | NG  | QT  | ANGH | SLFSSSTNTFAL              |
| 44_10454 | Q   | AFT | SLG | SY  | AL   | APVIPRLAVTGFTFSQSFLVTALLD |
| 45_10126 | HG  | MT  | NG  | QT  | ANGH | SLFSSSTNTFAL              |
| 46_1547  | Q   | AFT | SLG | SY  | AL   | APVIPRLAVTGFTFSQSFLVTALLD |
| 47_6749  | HG  | MT  | NG  | QT  | ANGH | SLFSSSTNTFAL              |
| 48_9982  | Q   | AFT | SLG | SY  | AL   | APVIPRLAVTGFTFSQSFLVTALLD |
| 49_7293  | HG  | MT  | NG  | QT  | ANGH | SLFSSSTNTFAL              |
| 50_5993  | Q   | AFT | SLG | SY  | AL   | APVIPRLAVTGFTFSQSFLVTALLD |
| 51_4791  | HG  | MT  | NG  | QT  | ANGH | SLFSSSTNTFAL              |
| 52_121   | Q   | AFT | SLG | SY  | AL   | APVIPRLAVTGFTFSQSFLVTALLD |
| 53_1667  | HG  | MT  | NG  | QT  | ANGH | SLFSSSTNTFAL              |
| 54_10488 | Q   | AFT | SLG | SY  | AL   | APVIPRLAVTGFTFSQSFLVTALLD |
| 55_7733  | HG  | MT  | NG  | QT  | ANGH | SLFSSSTNTFAL              |
| 56_3982  | Q   | AFT | SLG | SY  | AL   | APVIPRLAVTGFTFSQSFLVTALLD |
| 57_392   | HG  | MT  | NG  | QT  | ANGH | SLFSSSTNTFAL              |
| 58_10291 | Q   | AFT | SLG | SY  | AL   | APVIPRLAVTGFTFSQSFLVTALLD |
| 59_5792  | HG  | MT  | NG  | QT  | ANGH | SLFSSSTNTFAL              |
| 60_8712  | Q   | AFT | SLG | SY  | AL   | APVIPRLAVTGFTFSQSFLVTALLD |
| 61_6716  | HG  | MT  | NG  | QT  | ANGH | SLFSSSTNTFAL              |
| 62_5599  | Q   | AFT | SLG | SY  | AL   | APVIPRLAVTGFTFSQSFLVTALLD |
| 63_304   | HG  | MT  | NG  | QT  | ANGH | SLFSSSTNTFAL              |
| 64_10473 | Q   | AFT | SLG | SY  | AL   | APVIPRLAVTGFTFSQSFLVTALLD |
| 65_6310  | LS  | GI  | T   | L   | A    | VQPGERVAVCGRTGSGKS        |
| 66_8714  | Q   | AFT | SLG | SY  | AL   | APVIPRLAVTGFTFSQSFLVTALLD |
| 67_2350  | HG  | MT  | NG  | QT  | ANGH | SLFSSSTNTFAL              |
| 68_2447  | Q   | AFT | SLG | SY  | AL   | APVIPRLAVTGFTFSQSFLVTALLD |
| 69_5658  | HG  | MT  | NG  | QT  | ANGH | SLFSSSTNTFAL              |
| 70_1277  | Q   | AFT | SLG | SY  | AL   | APVIPRLAVTGFTFSQSFLVTALLD |
| 71_3717  | HG  | MT  | NG  | QT  | ANGH | SLFSSSTNTFAL              |
| 72_7846  | Q   | AFT | SLG | SY  | AL   | APVIPRLAVTGFTFSQSFLVTALLD |
| 73_10528 | HG  | MT  | NG  | QT  | ANGH | SLFSSSTNTFAL              |
| 74_4899  | Q   | AFT | SLG | SY  | AL   | APVIPRLAVTGFTFSQSFLVTALLD |
| 75_5507  | HG  | MT  | NG  | QT  | ANGH | SLFSSSTNTFAL              |
| 76_5432  | Q   | AFT | SLG | SY  | AL   | APVIPRLAVTGFTFSQSFLVTALLD |
| 77_10770 | HG  | MT  | NG  | QT  | ANGH | SLFSSSTNTFAL              |
| 78_5904  | Q   | AFT | SLG | SY  | AL   | APVIPRLAVTGFTFSQSFLVTALLD |
| 79_9653  | HG  | MT  | NG  | QT  | ANGH | SLFSSSTNTFAL              |
| 80_4462  | Q   | AFT | SLG | SY  | AL   | APVIPRLAVTGFTFSQSFLVTALLD |
| 81_7194  | HG  | MT  | NG  | QT  | ANGH | SLFSSSTNTFAL              |
| 82_1022  | Q   | AFT | SLG | SY  | AL   | APVIPRLAVTGFTFSQSFLVTALLD |
| 83_9813  | HG  | MT  | NG  | QT  | ANGH | SLFSSSTNTFAL              |
| 84_1902  | Q   | AFT | SLG | SY  | AL   | APVIPRLAVTGFTFSQSFLVTALLD |
| 85_5152  | HG  | MT  | NG  | QT  | ANGH | SLFSSSTNTFAL              |
| 86_3385  | Q   | AFT | SLG | SY  | AL   | APVIPRLAVTGFTFSQSFLVTALLD |
| 87_10760 | HG  | MT  | NG  | QT  | ANGH | SLFSSSTNTFAL              |
| 88_1588  | Q   | AFT | SLG | SY  | AL   | APVIPRLAVTGFTFSQSFLVTALLD |
| 89_1609  | HG  | MT  | NG  | QT  | ANGH | SLFSSSTNTFAL              |
| 90_4023  | Q   | AFT | SLG | SY  | AL   | APVIPRLAVTGFTFSQSFLVTALLD |

|          | 310              | 320            | 330            | 340               | 350   | 360    |
|----------|------------------|----------------|----------------|-------------------|-------|--------|
| 1_4160   | YLENGRDRPASHGYG  | LLGAYAFVYIGIAV | SNWSYSRHTYKSVS | IIRGGLIVSIFEKVLRL |       |        |
| 2_6143   | YLENGRDRPASHGYG  | LLGAYAFVYIGIAV | SNWSYSRHTYKSVS | IIRGGLIVSIFEKVLRL |       |        |
| 3_6554   | YLENGRDRPASHGYG  | LLGAYAFVYIGIAV | SNWSYSRHTYKSVS | IIRGGLIVSIFEKVLRL |       |        |
| 4_111    | YLENGRDRPASHGYG  | LLGAYAFVYIGIAV | SNWSYSRHTYKSVS | IIRGGLIVSIFEKVLRL |       |        |
| 5_5742   | YLENGRDRPASHGYG  | LLGAYAFVYIGIAV | SNWSYSRHTYKSVS | IIRGGLIVSIFEKVLRL |       |        |
| 6_9490   | YLENGRDRPASHGYG  | LLGAYAFVYIGIAV | SNWSYSRHTYKSVS | IIRGGLIVSIFEKVLRL |       |        |
| 7_6313   | SDAKDTATDASNNEET | STAPDPGTASVTQN | ANNNGDQGVGTPV  | SDKQVYLRYARAMGFR  | NA    |        |
| 8_2552   | YLENGRDRPASHGYG  | LLGAYAFVYIGIAV | SNWSYSRHTYKSVS | IIRGGLIVSIFEKVLRL |       |        |
| 9_7745   | YLENGRDRPASHGYG  | LLGAYAFVYIGIAV | SNWSYSRHTYKSVS | IIRGGLIVSIFEKVLRL |       |        |
| 10_2315  | YLENGRDRPASHGYG  | LLGAYAFVYIGIAV | SNWSYSRHTYKSVS | IIRGGLIVSIFEKVLRL |       |        |
| 11_2035  | YLENGRDRPASHGYG  | LLGAYAFVYIGIAV | SNWSYSRHTYKSVS | IIRGGLIVSIFEKVLRL |       |        |
| 12_9640  | YLENGRDRPASHGYG  | LLGAYAFVYIGIAV | SNWSYSRHTYKSVS | IIRGGLIVSIFEKVLRL |       |        |
| 13_3674  | YLENGRDRPASHGYG  | LLGAYAFVYIGIAV | SNWSYSRHTYKSVS | IIRGGLIVSIFEKVLRL |       |        |
| 14_6548  | YLENGRDRPASHGYG  | LLGAYAFVYIGIAV | SNWSYSRHTYKSVS | IIRGGLIVSIFEKVLRL |       |        |
| 15_10828 | YLENGRDRPASHGYG  | LLGAYAFVYIGIAV | SNWSYSRHTYKSVS | IIRGGLIVSIFEKVLRL |       |        |
| 16_6578  | YLENGRDRPASHGYG  | LLGAYAFVYIGIAV | SNWSYSRHTYKSVS | IIRGGLIVSIFEKVLRL |       |        |
| 17_10233 | YLENGRDRPASHGYG  | LLGAYAFVYIGIAV | SNWSYSRHTYKSVS | IIRGGLIVSIFEKVLRL |       |        |
| 18_9261  | YLENGRDRPASHGYG  | LLGAYAFVYIGIAV | SNWSYSRHTYKSVS | IIRGGLIVSIFEKVLRL |       |        |
| 19_8450  | YLENGRDRPASHGYG  | LLGAYAFVYIGIAV | SNWSYSRHTYKSVS | IIRGGLIVSIFEKVLRL |       |        |
| 20_1727  | YLENGRDRPASHGYG  | LLGAYAFVYIGIAV | SNWSYSRHTYKSVS | IIRGGLIVSIFEKVLRL |       |        |
| 21_206   | YLENGRDRPASHGYG  | LLGAYAFVYIGIAV | SNWSYSRHTYKSVS | IIRGGLIVSIFEKVLRL |       |        |
| 22_7439  | YLENGRDRPASHGYG  | LLGAYAFVYIGIAV | SNWSYSRHTYKSVS | IIRGGLIVSIFEKVLRL |       |        |
| 23_3780  | YLENGRDRPASHGYG  | LLGAYAFVYIGIAV | SNWSYSRHTYKSVS | IIRGGLIVSIFEKVLRL |       |        |
| 24_967   | YLENGRDRPASHGYG  | LLGAYAFVYIGIAV | SNWSYSRHTYKSVS | IIRGGLIVSIFEKVLRL |       |        |
| 25_6595  | YLENGRDRPASHGYG  | LLGAYAFVYIGIAV | SNWSYSRHTYKSVS | IIRGGLIVSIFEKVLRL |       |        |
| 26_8391  | YLENGRDRPASHGYG  | LLGAYAFVYIGIAV | SNWSYSRHTYKSVS | IIRGGLIVSIFEKVLRL |       |        |
| 27_8170  | YLENGRDRPASHGYG  | LLGAYAFVYIGIAV | SNWSYSRHTYKSVS | IIRGGLIVSIFEKVLRL |       |        |
| 28_5209  | YLENGRDRPASHGYG  | LLGAYAFVYIGIAV | SNWSYSRHTYKSVS | IIRGGLIVSIFEKVLRL |       |        |
| 29_2181  | YLENGRDRPASHGYG  | LLGAYAFVYIGIAV | SNWSYSRHTYKSVS | IIRGGLIVSIFEKVLRL |       |        |
| 30_8564  | YLENGRDRPASHGYG  | LLGAYAFVYIGIAV | SNWSYSRHTYKSVS | IIRGGLIVSIFEKVLRL |       |        |
| 31_1582  | YLENGRDRPASHGYG  | LLGAYAFVYIGIAV | SNWSYSRHTYKSVS | IIRGGLIVSIFEKVLRL |       |        |
| 32_4537  | YLENGRDRPASHGYG  | LLGAYAFVYIGIAV | SNWSYSRHTYKSVS | IIRGGLIVSIFEKVLRL |       |        |
| 33_9418  | YLENGRDRPASHGYG  | LLGAYAFVYIGIAV | SNWSYSRHTYKSVS | IIRGGLIVSIFEKVLRL |       |        |
| 34_1782  | YLENGRDRPASHGYG  | LLGAYAFVYIGIAV | SNWSYSRHTYKSVS | IIRGGLIVSIFEKVLRL |       |        |
| 35_10360 | YLENGRDRPASHGYG  | LLGAYAFVYIGIAV | SNWSYSRHTYKSVS | IIRGGLIVSIFEKVLRL |       |        |
| 36_468   | YLENGRDRPASHGYG  | LLGAYAFVYIGIAV | SNWSYSRHTYKSVS | IIRGGLIVSIFEKVLRL |       |        |
| 37_4956  | YLENGRDRPASHGYG  | LLGAYAFVYIGIAV | SNWSYSRHTYKSVS | IIRGGLIVSIFEKVLRL |       |        |
| 38_4305  | YLENGRDRPASHGYG  | LLGAYAFVYIGIAV | SNWSYSRHTYKSVS | IIRGGLIVSIFEKVLRL |       |        |
| 39_4737  | YLENGRDRPASHGYG  | LLGAYAFVYIGIAV | SNWSYSRHTYKSVS | IIRGGLIVSIFEKVLRL |       |        |
| 40_9543  | YLENGRDRPASHGYG  | LLGAYAFVYIGIAV | SNWSYSRHTYKSVS | IIRGGLIVSIFEKVLRL |       |        |
| 41_6669  | YLENGRDRPASHGYG  | LLGAYAFVYIGIAV | SNWSYSRHTYKSVS | IIRGGLIVSIFEKVLRL |       |        |
| 42_10558 | YLENGRDRPASHGYG  | LLGAYAFVYIGIAV | SNWSYSRHTYKSVS | IIRGGLIVSIFEKVLRL |       |        |
| 43_8051  | YLENGRDRPASHGYG  | LLGAYAFVYIGIAV | SNWSYSRHTYKSVS | IIRGGLIVSIFEKVLRL |       |        |
| 44_10454 | YLENGRDRPASHGYG  | LLGAYAFVYIGIAV | SNWSYSRHTYKSVS | IIRGGLIVSIFEKVLRL |       |        |
| 45_10126 | YLENGRDRPASHGYG  | LLGAYAFVYIGIAV | SNWSYSRHTYKSVS | IIRGGLIVSIFEKVLRL |       |        |
| 46_1547  | YLENGRDRPASHGYG  | LLGAYAFVYIGIAV | SNWSYSRHTYKSVS | IIRGGLIVSIFEKVLRL |       |        |
| 47_6749  | YLENGRDRPASHGYG  | LLGAYAFVYIGIAV | SNWSYSRHTYKSVS | IIRGGLIVSIFEKVLRL |       |        |
| 48_9982  | YLENGRDRPASHGYG  | LLGAYAFVYIGIAV | SNWSYSRHTYKSVS | IIRGGLIVSIFEKVLRL |       |        |
| 49_7293  | YLENGRDRPASHGYG  | LLGAYAFVYIGIAV | SNWSYSRHTYKSVS | IIRGGLIVSIFEKVLRL |       |        |
| 50_5993  | YLENGRDRPASHGYG  | LLGAYAFVYIGIAV | SNWSYSRHTYKSVS | IIRGGLIVSIFEKVLRL |       |        |
| 51_4791  | YLENGRDRPASHGYG  | LLGAYAFVYIGIAV | SNWSYSRHTYKSVS | IIRGGLIVSIFEKVLRL |       |        |
| 52_121   | YLENGRDRPASHGYG  | LLGAYAFVYIGIAV | SNWSYSRHTYKSVS | IIRGGLIVSIFEKVLRL |       |        |
| 53_1667  | YLENGRDRPASHGYG  | LLGAYAFVYIGIAV | SNWSYSRHTYKSVS | IIRGGLIVSIFEKVLRL |       |        |
| 54_10488 | YLENGRDRPASHGYG  | LLGAYAFVYIGIAV | SNWSYSRHTYKSVS | IIRGGLIVSIFEKVLRL |       |        |
| 55_7733  | YLENGRDRPASHGYG  | LLGAYAFVYIGIAV | SNWSYSRHTYKSVS | IIRGGLIVSIFEKVLRL |       |        |
| 56_3982  | YLENGRDRPASHGYG  | LLGAYAFVYIGIAV | SNWSYSRHTYKSVS | IIRGGLIVSIFEKVLRL |       |        |
| 57_392   | YLENGRDRPASHGYG  | LLGAYAFVYIGIAV | SNWSYSRHTYKSVS | IIRGGLIVSIFEKVLRL |       |        |
| 58_10291 | YLENGRDRPASHGYG  | LLGAYAFVYIGIAV | SNWSYSRHTYKSVS | IIRGGLIVSIFEKVLRL |       |        |
| 59_5792  | YLENGRDRPASHGYG  | LLGAYAFVYIGIAV | SNWSYSRHTYKSVS | IIRGGLIVSIFEKVLRL |       |        |
| 60_8712  | YLENGRDRPASHGYG  | LLGAYAFVYIGIAV | SNWSYSRHTYKSVS | IIRGGLIVSIFEKVLRL |       |        |
| 61_6716  | YLENGRDRPASHGYG  | LLGAYAFVYIGIAV | SNWSYSRHTYKSVS | IIRGGLIVSIFEKVLRL |       |        |
| 62_5599  | YLENGRDRPASHGYG  | LLGAYAFVYIGIAV | SNWSYSRHTYKSVS | IIRGGLIVSIFEKVLRL |       |        |
| 63_304   | YLENGRDRPASHGYG  | LLGAYAFVYIGIAV | SNWSYSRHTYKSVS | IIRGGLIVSIFEKVLRL |       |        |
| 64_10473 | FTVVSQDSFFEP     | TSTFRQELDP     | SGDMSDQIIIEV   | LR                | ECRAW | EIVDGS |
| 65_6310  | YLENGRDRPASHGYG  | LLGAYAFVYIGIAV | SNWSYSRHTYKSVS | IIRGGLIVSIFEKVLRL |       |        |
| 66_8714  | YLENGRDRPASHGYG  | LLGAYAFVYIGIAV | SNWSYSRHTYKSVS | IIRGGLIVSIFEKVLRL |       |        |
| 67_2350  | YLENGRDRPASHGYG  | LLGAYAFVYIGIAV | SNWSYSRHTYKSVS | IIRGGLIVSIFEKVLRL |       |        |
| 68_2447  | YLENGRDRPASHGYG  | LLGAYAFVYIGIAV | SNWSYSRHTYKSVS | IIRGGLIVSIFEKVLRL |       |        |
| 69_5658  | YLENGRDRPASHGYG  | LLGAYAFVYIGIAV | SNWSYSRHTYKSVS | IIRGGLIVSIFEKVLRL |       |        |
| 70_1277  | YLENGRDRPASHGYG  | LLGAYAFVYIGIAV | SNWSYSRHTYKSVS | IIRGGLIVSIFEKVLRL |       |        |
| 71_3717  | YLENGRDRPASHGYG  | LLGAYAFVYIGIAV | SNWSYSRHTYKSVS | IIRGGLIVSIFEKVLRL |       |        |
| 72_7846  | YLENGRDRPASHGYG  | LLGAYAFVYIGIAV | SNWSYSRHTYKSVS | IIRGGLIVSIFEKVLRL |       |        |
| 73_10528 | YLENGRDRPASHGYG  | LLGAYAFVYIGIAV | SNWSYSRHTYKSVS | IIRGGLIVSIFEKVLRL |       |        |
| 74_4899  | YLENGRDRPASHGYG  | LLGAYAFVYIGIAV | SNWSYSRHTYKSVS | IIRGGLIVSIFEKVLRL |       |        |
| 75_5507  | YLENGRDRPASHGYG  | LLGAYAFVYIGIAV | SNWSYSRHTYKSVS | IIRGGLIVSIFEKVLRL |       |        |
| 76_5432  | YLENGRDRPASHGYG  | LLGAYAFVYIGIAV | SNWSYSRHTYKSVS | IIRGGLIVSIFEKVLRL |       |        |
| 77_10770 | YLENGRDRPASHGYG  | LLGAYAFVYIGIAV | SNWSYSRHTYKSVS | IIRGGLIVSIFEKVLRL |       |        |
| 78_5904  | YLENGRDRPASHGYG  | LLGAYAFVYIGIAV | SNWSYSRHTYKSVS | IIRGGLIVSIFEKVLRL |       |        |
| 79_9653  | YLENGRDRPASHGYG  | LLGAYAFVYIGIAV | SNWSYSRHTYKSVS | IIRGGLIVSIFEKVLRL |       |        |
| 80_4462  | YLENGRDRPASHGYG  | LLGAYAFVYIGIAV | SNWSYSRHTYKSVS | IIRGGLIVSIFEKVLRL |       |        |
| 81_7194  | YLENGRDRPASHGYG  | LLGAYAFVYIGIAV | SNWSYSRHTYKSVS | IIRGGLIVSIFEKVLRL |       |        |
| 82_1022  | YLENGRDRPASHGYG  | LLGAYAFVYIGIAV | SNWSYSRHTYKSVS | IIRGGLIVSIFEKVLRL |       |        |
| 83_9813  | YLENGRDRPASHGYG  | LLGAYAFVYIGIAV | SNWSYSRHTYKSVS | IIRGGLIVSIFEKVLRL |       |        |
| 84_1902  | YLENGRDRPASHGYG  | LLGAYAFVYIGIAV | SNWSYSRHTYKSVS | IIRGGLIVSIFEKVLRL |       |        |
| 85_5152  | YLENGRDRPASHGYG  | LLGAYAFVYIGIAV | SNWSYSRHTYKSVS | IIRGGLIVSIFEKVLRL |       |        |
| 86_3385  | YLENGRDRPASHGYG  | LLGAYAFVYIGIAV | SNWSYSRHTYKSVS | IIRGGLIVSIFEKVLRL |       |        |
| 87_10760 | YLENGRDRPASHGYG  | LLGAYAFVYIGIAV | SNWSYSRHTYKSVS | IIRGGLIVSIFEKVLRL |       |        |
| 88_1588  | YLENGRDRPASHGYG  | LLGAYAFVYIGIAV | SNWSYSRHTYKSVS | IIRGGLIVSIFEKVLRL |       |        |
| 89_1609  | YLENGRDRPASHGYG  | LLGAYAFVYIGIAV | SNWSYSRHTYKSVS | IIRGGLIVSIFEKVLRL |       |        |
| 90_4023  | YLENGRDRPASHGYG  | LLGAYAFVYIGIAV | SNWSYSRHTYKSVS | IIRGGLIVSIFEKVLRL |       |        |

|          | 370             | 380    | 390     | 400      | 410          | 420                 |
|----------|-----------------|--------|---------|----------|--------------|---------------------|
| 1_4160   | GEDSSIEAKATTLMI | SDVQRI | VGGLVY  | IHEVWAGV | LETALATY     | LLQRMGVSSVAMLG      |
| 2_6143   | GEDSSIEAKATTLMI | SDVQRI | VGGLVY  | IHEVWAGV | LETALATY     | LLQRMGVSSVAMLG      |
| 3_6554   | GEDSSIEAKATTLMI | SDVQRI | VGGLVY  | IHEVWAGV | LETALATY     | LLQRMGVSSVAMLG      |
| 4_111    | GEDSSIEAKATTLMI | SDVQRI | VGGLVY  | IHEVWAGV | LETALATY     | LLQRMGVSSVAMLG      |
| 5_5742   | GEDSSIEAKATTLMI | SDVQRI | VGGLVY  | IHEVWAGV | LETALATY     | LLQRMGVSSVAMLG      |
| 6_9490   | GEDSSIEAKATTLMI | SDVQRI | VGGLVY  | IHEVWAGV | LETALATY     | LLQRMGVSSVAMLG      |
| 7_6313   | GVFLLLMIGCAITL  | KMPDLW | QWWSTAM | KEGDTY   | GNYSYWIGILAL | LEVLP               |
| 8_2552   | GEDSSIEAKATTLMI | SDVQRI | VGGLVY  | IHEVWAGV | LETALATY     | LLQRMGVSSVAMLG      |
| 9_7745   | GEDSSIEAKATTLMI | SDVQRI | VGGLVY  | IHEVWAGV | LETALATY     | LLQRMGVSSVAMLG      |
| 10_2315  | GEDSSIEAKATTLMI | SDVQRI | VGGLVY  | IHEVWAGV | LETALATY     | LLQRMGVSSVAMLG      |
| 11_2035  | GEDSSIEAKATTLMI | SDVQRI | VGGLVY  | IHEVWAGV | LETALATY     | LLQRMGVSSVAMLG      |
| 12_9640  | GEDSSIEAKATTLMI | SDVQRI | VGGLVY  | IHEVWAGV | LETALATY     | LLQRMGVSSVAMLG      |
| 13_3674  | GEDSSIEAKATTLMI | SDVQRI | VGGLVY  | IHEVWAGV | LETALATY     | LLQRMGVSSVAMLG      |
| 14_6548  | GEDSSIEAKATTLMI | SDVQRI | VGGLVY  | IHEVWAGV | LETALATY     | LLQRMGVSSVAMLG      |
| 15_10828 | GEDSSIEAKATTLMI | SDVQRI | VGGLVY  | IHEVWAGV | LETALATY     | LLQRMGVSSVAMLG      |
| 16_6578  | GEDSSIEAKATTLMI | SDVQRI | VGGLVY  | IHEVWAGV | LETALATY     | LLQRMGVSSVAMLG      |
| 17_10233 | GEDSSIEAKATTLMI | SDVQRI | VGGLVY  | IHEVWAGV | LETALATY     | LLQRMGVSSVAMLG      |
| 18_9261  | GEDSSIEAKATTLMI | SDVQRI | VGGLVY  | IHEVWAGV | LETALATY     | LLQRMGVSSVAMLG      |
| 19_8450  | GEDSSIEAKATTLMI | SDVQRI | VGGLVY  | IHEVWAGV | LETALATY     | LLQRMGVSSVAMLG      |
| 20_1727  | GEDSSIEAKATTLMI | SDVQRI | VGGLVY  | IHEVWAGV | LETALATY     | LLQRMGVSSVAMLG      |
| 21_206   | GEDSSIEAKATTLMI | SDVQRI | VGGLVY  | IHEVWAGV | LETALATY     | LLQRMGVSSVAMLG      |
| 22_7439  | GEDSSIEAKATTLMI | SDVQRI | VGGLVY  | IHEVWAGV | LETALATY     | LLQRMGVSSVAMLG      |
| 23_3780  | GEDSSIEAKATTLMI | SDVQRI | VGGLVY  | IHEVWAGV | LETALATY     | LLQRMGVSSVAMLG      |
| 24_967   | GEDSSIEAKATTLMI | SDVQRI | VGGLVY  | IHEVWAGV | LETALATY     | LLQRMGVSSVAMLG      |
| 25_6595  | GEDSSIEAKATTLMI | SDVQRI | VGGLVY  | IHEVWAGV | LETALATY     | LLQRMGVSSVAMLG      |
| 26_8391  | GEDSSIEAKATTLMI | SDVQRI | VGGLVY  | IHEVWAGV | LETALATY     | LLQRMGVSSVAMLG      |
| 27_8170  | GEDSSIEAKATTLMI | SDVQRI | VGGLVY  | IHEVWAGV | LETALATY     | LLQRMGVSSVAMLG      |
| 28_5209  | GEDSSIEAKATTLMI | SDVQRI | VGGLVY  | IHEVWAGV | LETALATY     | LLQRMGVSSVAMLG      |
| 29_2181  | GEDSSIEAKATTLMI | SDVQRI | VGGLVY  | IHEVWAGV | LETALATY     | LLQRMGVSSVAMLG      |
| 30_8564  | GEDSSIEAKATTLMI | SDVQRI | VGGLVY  | IHEVWAGV | LETALATY     | LLQRMGVSSVAMLG      |
| 31_1582  | GEDSSIEAKATTLMI | SDVQRI | VGGLVY  | IHEVWAGV | LETALATY     | LLQRMGVSSVAMLG      |
| 32_4537  | GEDSSIEAKATTLMI | SDVQRI | VGGLVY  | IHEVWAGV | LETALATY     | LLQRMGVSSVAMLG      |
| 33_9418  | GEDSSIEAKATTLMI | SDVQRI | VGGLVY  | IHEVWAGV | LETALATY     | LLQRMGVSSVAMLG      |
| 34_1782  | GEDSSIEAKATTLMI | SDVQRI | VGGLVY  | IHEVWAGV | LETALATY     | LLQRMGVSSVAMLG      |
| 35_10360 | GEDSSIEAKATTLMI | SDVQRI | VGGLVY  | IHEVWAGV | LETALATY     | LLQRMGVSSVAMLG      |
| 36_468   | GEDSSIEAKATTLMI | SDVQRI | VGGLVY  | IHEVWAGV | LETALATY     | LLQRMGVSSVAMLG      |
| 37_4956  | GEDSSIEAKATTLMI | SDVQRI | VGGLVY  | IHEVWAGV | LETALATY     | LLQRMGVSSVAMLG      |
| 38_4305  | GEDSSIEAKATTLMI | SDVQRI | VGGLVY  | IHEVWAGV | LETALATY     | LLQRMGVSSVAMLG      |
| 39_4737  | GEDSSIEAKATTLMI | SDVQRI | VGGLVY  | IHEVWAGV | LETALATY     | LLQRMGVSSVAMLG      |
| 40_9543  | GEDSSIEAKATTLMI | SDVQRI | VGGLVY  | IHEVWAGV | LETALATY     | LLQRMGVSSVAMLG      |
| 41_6669  | GEDSSIEAKATTLMI | SDVQRI | VGGLVY  | IHEVWAGV | LETALATY     | LLQRMGVSSVAMLG      |
| 42_10558 | GEDSSIEAKATTLMI | SDVQRI | VGGLVY  | IHEVWAGV | LETALATY     | LLQRMGVSSVAMLG      |
| 43_8051  | GEDSSIEAKATTLMI | SDVQRI | VGGLVY  | IHEVWAGV | LETALATY     | LLQRMGVSSVAMLG      |
| 44_10454 | GEDSSIEAKATTLMI | SDVQRI | VGGLVY  | IHEVWAGV | LETALATY     | LLQRMGVSSVAMLG      |
| 45_10126 | GEDSSIEAKATTLMI | SDVQRI | VGGLVY  | IHEVWAGV | LETALATY     | LLQRMGVSSVAMLG      |
| 46_1547  | GEDSSIEAKATTLMI | SDVQRI | VGGLVY  | IHEVWAGV | LETALATY     | LLQRMGVSSVAMLG      |
| 47_6749  | GEDSSIEAKATTLMI | SDVQRI | VGGLVY  | IHEVWAGV | LETALATY     | LLQRMGVSSVAMLG      |
| 48_9982  | GEDSSIEAKATTLMI | SDVQRI | VGGLVY  | IHEVWAGV | LETALATY     | LLQRMGVSSVAMLG      |
| 49_7293  | GEDSSIEAKATTLMI | SDVQRI | VGGLVY  | IHEVWAGV | LETALATY     | LLQRMGVSSVAMLG      |
| 50_5993  | GEDSSIEAKATTLMI | SDVQRI | VGGLVY  | IHEVWAGV | LETALATY     | LLQRMGVSSVAMLG      |
| 51_4791  | GEDSSIEAKATTLMI | SDVQRI | VGGLVY  | IHEVWAGV | LETALATY     | LLQRMGVSSVAMLG      |
| 52_121   | GEDSSIEAKATTLMI | SDVQRI | VGGLVY  | IHEVWAGV | LETALATY     | LLQRMGVSSVAMLG      |
| 53_1667  | GEDSSIEAKATTLMI | SDVQRI | VGGLVY  | IHEVWAGV | LETALATY     | LLQRMGVSSVAMLG      |
| 54_10488 | GEDSSIEAKATTLMI | SDVQRI | VGGLVY  | IHEVWAGV | LETALATY     | LLQRMGVSSVAMLG      |
| 55_7733  | GEDSSIEAKATTLMI | SDVQRI | VGGLVY  | IHEVWAGV | LETALATY     | LLQRMGVSSVAMLG      |
| 56_3982  | GEDSSIEAKATTLMI | SDVQRI | VGGLVY  | IHEVWAGV | LETALATY     | LLQRMGVSSVAMLG      |
| 57_392   | GEDSSIEAKATTLMI | SDVQRI | VGGLVY  | IHEVWAGV | LETALATY     | LLQRMGVSSVAMLG      |
| 58_10291 | GEDSSIEAKATTLMI | SDVQRI | VGGLVY  | IHEVWAGV | LETALATY     | LLQRMGVSSVAMLG      |
| 59_5792  | GEDSSIEAKATTLMI | SDVQRI | VGGLVY  | IHEVWAGV | LETALATY     | LLQRMGVSSVAMLG      |
| 60_8712  | GEDSSIEAKATTLMI | SDVQRI | VGGLVY  | IHEVWAGV | LETALATY     | LLQRMGVSSVAMLG      |
| 61_6716  | GEDSSIEAKATTLMI | SDVQRI | VGGLVY  | IHEVWAGV | LETALATY     | LLQRMGVSSVAMLG      |
| 62_5599  | GEDSSIEAKATTLMI | SDVQRI | VGGLVY  | IHEVWAGV | LETALATY     | LLQRMGVSSVAMLG      |
| 63_304   | GEDSSIEAKATTLMI | SDVQRI | VGGLVY  | IHEVWAGV | LETALATY     | LLQRMGVSSVAMLG      |
| 64_10473 | AGEVQLLA        | IAIRLV | LQWQS   | Q        | PAGSGGII     | LLDEATSNLDRQTEVLVES |
| 65_6310  | GEDSSIEAKATTLMI | SDVQRI | VGGLVY  | IHEVWAGV | LETALATY     | LLQRMGVSSVAMLG      |
| 66_8714  | GEDSSIEAKATTLMI | SDVQRI | VGGLVY  | IHEVWAGV | LETALATY     | LLQRMGVSSVAMLG      |
| 67_2350  | GEDSSIEAKATTLMI | SDVQRI | VGGLVY  | IHEVWAGV | LETALATY     | LLQRMGVSSVAMLG      |
| 68_2447  | GEDSSIEAKATTLMI | SDVQRI | VGGLVY  | IHEVWAGV | LETALATY     | LLQRMGVSSVAMLG      |
| 69_5658  | GEDSSIEAKATTLMI | SDVQRI | VGGLVY  | IHEVWAGV | LETALATY     | LLQRMGVSSVAMLG      |
| 70_1277  | GEDSSIEAKATTLMI | SDVQRI | VGGLVY  | IHEVWAGV | LETALATY     | LLQRMGVSSVAMLG      |
| 71_3717  | GEDSSIEAKATTLMI | SDVQRI | VGGLVY  | IHEVWAGV | LETALATY     | LLQRMGVSSVAMLG      |
| 72_7846  | GEDSSIEAKATTLMI | SDVQRI | VGGLVY  | IHEVWAGV | LETALATY     | LLQRMGVSSVAMLG      |
| 73_10528 | GEDSSIEAKATTLMI | SDVQRI | VGGLVY  | IHEVWAGV | LETALATY     | LLQRMGVSSVAMLG      |
| 74_4899  | GEDSSIEAKATTLMI | SDVQRI | VGGLVY  | IHEVWAGV | LETALATY     | LLQRMGVSSVAMLG      |
| 75_5507  | GEDSSIEAKATTLMI | SDVQRI | VGGLVY  | IHEVWAGV | LETALATY     | LLQRMGVSSVAMLG      |
| 76_5432  | GEDSSIEAKATTLMI | SDVQRI | VGGLVY  | IHEVWAGV | LETALATY     | LLQRMGVSSVAMLG      |
| 77_10770 | GEDSSIEAKATTLMI | SDVQRI | VGGLVY  | IHEVWAGV | LETALATY     | LLQRMGVSSVAMLG      |
| 78_5904  | GEDSSIEAKATTLMI | SDVQRI | VGGLVY  | IHEVWAGV | LETALATY     | LLQRMGVSSVAMLG      |
| 79_9653  | GEDSSIEAKATTLMI | SDVQRI | VGGLVY  | IHEVWAGV | LETALATY     | LLQRMGVSSVAMLG      |
| 80_4462  | GEDSSIEAKATTLMI | SDVQRI | VGGLVY  | IHEVWAGV | LETALATY     | LLQRMGVSSVAMLG      |
| 81_7194  | GEDSSIEAKATTLMI | SDVQRI | VGGLVY  | IHEVWAGV | LETALATY     | LLQRMGVSSVAMLG      |
| 82_1022  | GEDSSIEAKATTLMI | SDVQRI | VGGLVY  | IHEVWAGV | LETALATY     | LLQRMGVSSVAMLG      |
| 83_9813  | GEDSSIEAKATTLMI | SDVQRI | VGGLVY  | IHEVWAGV | LETALATY     | LLQRMGVSSVAMLG      |
| 84_1902  | GEDSSIEAKATTLMI | SDVQRI | VGGLVY  | IHEVWAGV | LETALATY     | LLQRMGVSSVAMLG      |
| 85_5152  | GEDSSIEAKATTLMI | SDVQRI | VGGLVY  | IHEVWAGV | LETALATY     | LLQRMGVSSVAMLG      |
| 86_3385  | GEDSSIEAKATTLMI | SDVQRI | VGGLVY  | IHEVWAGV | LETALATY     | LLQRMGVSSVAMLG      |
| 87_10760 | GEDSSIEAKATTLMI | SDVQRI | VGGLVY  | IHEVWAGV | LETALATY     | LLQRMGVSSVAMLG      |
| 88_1588  | GEDSSIEAKATTLMI | SDVQRI | VGGLVY  | IHEVWAGV | LETALATY     | LLQRMGVSSVAMLG      |
| 89_1609  | GEDSSIEAKATTLMI | SDVQRI | VGGLVY  | IHEVWAGV | LETALATY     | LLQRMGVSSVAMLG      |
| 90_4023  | GEDSSIEAKATTLMI | SDVQRI | VGGLVY  | IHEVWAGV | LETALATY     | LLQRMGVSSVAMLG      |

|          | 430 | 440 | 450 | 460 | 470 | 480 |
|----------|-----|-----|-----|-----|-----|-----|
| 1_4160   | L   | S   | C   | G   | V   | G   |
| 2_6143   | S   | C   | G   | V   | G   | A   |
| 3_6554   | L   | S   | C   | G   | V   | G   |
| 4_111    | L   | S   | C   | G   | V   | G   |
| 5_5742   | L   | S   | C   | G   | V   | G   |
| 6_9490   | L   | S   | C   | G   | V   | G   |
| 7_6313   | L   | M   | F   | W   | V   | P   |
| 8_2552   | L   | S   | C   | G   | V   | G   |
| 9_7745   | L   | S   | C   | G   | V   | G   |
| 10_2315  | L   | S   | C   | G   | V   | G   |
| 11_2035  | L   | S   | C   | G   | V   | G   |
| 12_9640  | L   | S   | C   | G   | V   | G   |
| 13_3674  | L   | S   | C   | G   | V   | G   |
| 14_6548  | L   | S   | C   | G   | V   | G   |
| 15_10828 | L   | S   | C   | G   | V   | G   |
| 16_6578  | L   | S   | C   | G   | V   | G   |
| 17_10233 | L   | S   | C   | G   | V   | G   |
| 18_9261  | L   | S   | C   | G   | V   | G   |
| 19_8450  | L   | S   | C   | G   | V   | G   |
| 20_1727  | L   | S   | C   | G   | V   | G   |
| 21_206   | L   | S   | C   | G   | V   | G   |
| 22_7439  | L   | S   | C   | G   | V   | G   |
| 23_3780  | L   | S   | C   | G   | V   | G   |
| 24_967   | L   | S   | C   | G   | V   | G   |
| 25_6595  | L   | S   | C   | G   | V   | G   |
| 26_8391  | L   | S   | C   | G   | V   | G   |
| 27_8170  | L   | S   | C   | G   | V   | G   |
| 28_5209  | L   | S   | C   | G   | V   | G   |
| 29_2181  | L   | S   | C   | G   | V   | G   |
| 30_8564  | L   | S   | C   | G   | V   | G   |
| 31_1582  | L   | S   | C   | G   | V   | G   |
| 32_4537  | L   | S   | C   | G   | V   | G   |
| 33_9418  | L   | S   | C   | G   | V   | G   |
| 34_1782  | L   | S   | C   | G   | V   | G   |
| 35_10360 | L   | S   | C   | G   | V   | G   |
| 36_468   | L   | S   | C   | G   | V   | G   |
| 37_4956  | L   | S   | C   | G   | V   | G   |
| 38_4305  | L   | S   | C   | G   | V   | G   |
| 39_4737  | L   | S   | C   | G   | V   | G   |
| 40_9543  | L   | S   | C   | G   | V   | G   |
| 41_6669  | L   | S   | C   | G   | V   | G   |
| 42_10558 | L   | S   | C   | G   | V   | G   |
| 43_8051  | L   | S   | C   | G   | V   | G   |
| 44_10454 | L   | S   | C   | G   | V   | G   |
| 45_10126 | L   | S   | C   | G   | V   | G   |
| 46_1547  | L   | S   | C   | G   | V   | G   |
| 47_6749  | L   | S   | C   | G   | V   | G   |
| 48_9982  | L   | S   | C   | G   | V   | G   |
| 49_7293  | L   | S   | C   | G   | V   | G   |
| 50_5993  | L   | S   | C   | G   | V   | G   |
| 51_4791  | L   | S   | C   | G   | V   | G   |
| 52_121   | L   | S   | C   | G   | V   | G   |
| 53_1667  | L   | S   | C   | G   | V   | G   |
| 54_10488 | L   | S   | C   | G   | V   | G   |
| 55_7733  | L   | S   | C   | G   | V   | G   |
| 56_3982  | L   | S   | C   | G   | V   | G   |
| 57_392   | L   | S   | C   | G   | V   | G   |
| 58_10291 | L   | S   | C   | G   | V   | G   |
| 59_5792  | L   | S   | C   | G   | V   | G   |
| 60_8712  | L   | S   | C   | G   | V   | G   |
| 61_6716  | L   | S   | C   | G   | V   | G   |
| 62_5599  | L   | S   | C   | G   | V   | G   |
| 63_304   | L   | S   | C   | G   | V   | G   |
| 64_10473 | M   | H   | R   | L   | E   | A   |
| 65_6310  | L   | S   | C   | G   | V   | G   |
| 66_8714  | L   | S   | C   | G   | V   | G   |
| 67_2350  | L   | S   | C   | G   | V   | G   |
| 68_2447  | L   | S   | C   | G   | V   | G   |
| 69_5658  | L   | S   | C   | G   | V   | G   |
| 70_1277  | L   | S   | C   | G   | V   | G   |
| 71_3717  | L   | S   | C   | G   | V   | G   |
| 72_7846  | L   | S   | C   | G   | V   | G   |
| 73_10528 | L   | S   | C   | G   | V   | G   |
| 74_4899  | L   | S   | C   | G   | V   | G   |
| 75_5507  | L   | S   | C   | G   | V   | G   |
| 76_5432  | L   | S   | C   | G   | V   | G   |
| 77_10770 | L   | S   | C   | G   | V   | G   |
| 78_5904  | L   | S   | C   | G   | V   | G   |
| 79_9653  | L   | S   | C   | G   | V   | G   |
| 80_4462  | L   | S   | C   | G   | V   | G   |
| 81_7194  | L   | S   | C   | G   | V   | G   |
| 82_1022  | L   | S   | C   | G   | V   | G   |
| 83_9813  | L   | S   | C   | G   | V   | G   |
| 84_1902  | L   | S   | C   | G   | V   | G   |
| 85_5152  | L   | S   | C   | G   | V   | G   |
| 86_3385  | L   | S   | C   | G   | V   | G   |
| 87_10760 | L   | S   | C   | G   | V   | G   |
| 88_1588  | L   | S   | C   | G   | V   | G   |
| 89_1609  | L   | S   | C   | G   | V   | G   |
| 90_4023  | L   | S   | C   | G   | V   | G   |

|          | 490   | 500   | 510   | 520   | 530   | 540   |
|----------|-------|-------|-------|-------|-------|-------|
| 1_4160   | LEIQ  | AARP  | FFRAL | ITAS  | SVIL  | SYSTM |
| 2_6143   | LEIQ  | AARP  | FFRAL | ITAS  | SVIL  | SYSTM |
| 3_6554   | LEIQ  | AARP  | FFRAL | ITAS  | SVIL  | SYSTM |
| 4_111    | LEIQ  | AARP  | FFRAL | ITAS  | SVIL  | SYSTM |
| 5_5742   | LEIQ  | AARP  | FFRAL | ITAS  | SVIL  | SYSTM |
| 6_9490   | LEIQ  | AARP  | FFRAL | ITAS  | SVIL  | SYSTM |
| 7_6313   | SEM   | FVS   | IFQ   | LVL   | VVV   | SKEA  |
| 8_2552   | LEIQ  | AARP  | FFRAL | ITAS  | SVIL  | SYSTM |
| 9_7745   | LEIQ  | AARP  | FFRAL | ITAS  | SVIL  | SYSTM |
| 10_2315  | LEIQ  | AARP  | FFRAL | ITAS  | SVIL  | SYSTM |
| 11_2035  | LEIQ  | AARP  | FFRAL | ITAS  | SVIL  | SYSTM |
| 12_9640  | LEIQ  | AARP  | FFRAL | ITAS  | SVIL  | SYSTM |
| 13_3674  | LEIQ  | AARP  | FFRAL | ITAS  | SVIL  | SYSTM |
| 14_6548  | LEIQ  | AARP  | FFRAL | ITAS  | SVIL  | SYSTM |
| 15_10828 | LEIQ  | AARP  | FFRAL | ITAS  | SVIL  | SYSTM |
| 16_6578  | LEIQ  | AARP  | FFRAL | ITAS  | SVIL  | SYSTM |
| 17_10233 | LEIQ  | AARP  | FFRAL | ITAS  | SVIL  | SYSTM |
| 18_9261  | LEIQ  | AARP  | FFRAL | ITAS  | SVIL  | SYSTM |
| 19_8450  | LEIQ  | AARP  | FFRAL | ITAS  | SVIL  | SYSTM |
| 20_1727  | LEIQ  | AARP  | FFRAL | ITAS  | SVIL  | SYSTM |
| 21_206   | LEIQ  | AARP  | FFRAL | ITAS  | SVIL  | SYSTM |
| 22_7439  | LEIQ  | AARP  | FFRAL | ITAS  | SVIL  | SYSTM |
| 23_3780  | LEIQ  | AARP  | FFRAL | ITAS  | SVIL  | SYSTM |
| 24_967   | LEIQ  | AARP  | FFRAL | ITAS  | SVIL  | SYSTM |
| 25_6595  | LEIQ  | AARP  | FFRAL | ITAS  | SVIL  | SYSTM |
| 26_8391  | LEIQ  | AARP  | FFRAL | ITAS  | SVIL  | SYSTM |
| 27_8170  | LEIQ  | AARP  | FFRAL | ITAS  | SVIL  | SYSTM |
| 28_5209  | LEIQ  | AARP  | FFRAL | ITAS  | SVIL  | SYSTM |
| 29_2181  | LEIQ  | AARP  | FFRAL | ITAS  | SVIL  | SYSTM |
| 30_8564  | LEIQ  | AARP  | FFRAL | ITAS  | SVIL  | SYSTM |
| 31_1582  | LEIQ  | AARP  | FFRAL | ITAS  | SVIL  | SYSTM |
| 32_4537  | LEIQ  | AARP  | FFRAL | ITAS  | SVIL  | SYSTM |
| 33_9418  | LEIQ  | AARP  | FFRAL | ITAS  | SVIL  | SYSTM |
| 34_1782  | LEIQ  | AARP  | FFRAL | ITAS  | SVIL  | SYSTM |
| 35_10360 | LEIQ  | AARP  | FFRAL | ITAS  | SVIL  | SYSTM |
| 36_468   | LEIQ  | AARP  | FFRAL | ITAS  | SVIL  | SYSTM |
| 37_4956  | LEIQ  | AARP  | FFRAL | ITAS  | SVIL  | SYSTM |
| 38_4305  | LEIQ  | AARP  | FFRAL | ITAS  | SVIL  | SYSTM |
| 39_4737  | LEIQ  | AARP  | FFRAL | ITAS  | SVIL  | SYSTM |
| 40_9543  | LEIQ  | AARP  | FFRAL | ITAS  | SVIL  | SYSTM |
| 41_6669  | LEIQ  | AARP  | FFRAL | ITAS  | SVIL  | SYSTM |
| 42_10558 | LEIQ  | AARP  | FFRAL | ITAS  | SVIL  | SYSTM |
| 43_8051  | LEIQ  | AARP  | FFRAL | ITAS  | SVIL  | SYSTM |
| 44_10454 | LEIQ  | AARP  | FFRAL | ITAS  | SVIL  | SYSTM |
| 45_10126 | LEIQ  | AARP  | FFRAL | ITAS  | SVIL  | SYSTM |
| 46_1547  | LEIQ  | AARP  | FFRAL | ITAS  | SVIL  | SYSTM |
| 47_6749  | LEIQ  | AARP  | FFRAL | ITAS  | SVIL  | SYSTM |
| 48_9982  | LEIQ  | AARP  | FFRAL | ITAS  | SVIL  | SYSTM |
| 49_7293  | LEIQ  | AARP  | FFRAL | ITAS  | SVIL  | SYSTM |
| 50_5993  | LEIQ  | AARP  | FFRAL | ITAS  | SVIL  | SYSTM |
| 51_4791  | LEIQ  | AARP  | FFRAL | ITAS  | SVIL  | SYSTM |
| 52_121   | LEIQ  | AARP  | FFRAL | ITAS  | SVIL  | SYSTM |
| 53_1667  | LEIQ  | AARP  | FFRAL | ITAS  | SVIL  | SYSTM |
| 54_10488 | LEIQ  | AARP  | FFRAL | ITAS  | SVIL  | SYSTM |
| 55_7733  | LEIQ  | AARP  | FFRAL | ITAS  | SVIL  | SYSTM |
| 56_3982  | LEIQ  | AARP  | FFRAL | ITAS  | SVIL  | SYSTM |
| 57_392   | LEIQ  | AARP  | FFRAL | ITAS  | SVIL  | SYSTM |
| 58_10291 | LEIQ  | AARP  | FFRAL | ITAS  | SVIL  | SYSTM |
| 59_5792  | LEIQ  | AARP  | FFRAL | ITAS  | SVIL  | SYSTM |
| 60_8712  | LEIQ  | AARP  | FFRAL | ITAS  | SVIL  | SYSTM |
| 61_6716  | LEIQ  | AARP  | FFRAL | ITAS  | SVIL  | SYSTM |
| 62_5599  | LEIQ  | AARP  | FFRAL | ITAS  | SVIL  | SYSTM |
| 63_304   | LEIQ  | AARP  | FFRAL | ITAS  | SVIL  | SYSTM |
| 64_10473 | ..... | ..... | ..... | ..... | ..... | ..... |
| 65_6310  | LEIQ  | AARP  | FFRAL | ITAS  | SVIL  | SYSTM |
| 66_8714  | LEIQ  | AARP  | FFRAL | ITAS  | SVIL  | SYSTM |
| 67_2350  | LEIQ  | AARP  | FFRAL | ITAS  | SVIL  | SYSTM |
| 68_2447  | LEIQ  | AARP  | FFRAL | ITAS  | SVIL  | SYSTM |
| 69_5658  | LEIQ  | AARP  | FFRAL | ITAS  | SVIL  | SYSTM |
| 70_1277  | LEIQ  | AARP  | FFRAL | ITAS  | SVIL  | SYSTM |
| 71_3717  | LEIQ  | AARP  | FFRAL | ITAS  | SVIL  | SYSTM |
| 72_7846  | LEIQ  | AARP  | FFRAL | ITAS  | SVIL  | SYSTM |
| 73_10528 | LEIQ  | AARP  | FFRAL | ITAS  | SVIL  | SYSTM |
| 74_4899  | LEIQ  | AARP  | FFRAL | ITAS  | SVIL  | SYSTM |
| 75_5507  | LEIQ  | AARP  | FFRAL | ITAS  | SVIL  | SYSTM |
| 76_5432  | LEIQ  | AARP  | FFRAL | ITAS  | SVIL  | SYSTM |
| 77_10770 | LEIQ  | AARP  | FFRAL | ITAS  | SVIL  | SYSTM |
| 78_5904  | LEIQ  | AARP  | FFRAL | ITAS  | SVIL  | SYSTM |
| 79_9653  | LEIQ  | AARP  | FFRAL | ITAS  | SVIL  | SYSTM |
| 80_4462  | LEIQ  | AARP  | FFRAL | ITAS  | SVIL  | SYSTM |
| 81_7194  | LEIQ  | AARP  | FFRAL | ITAS  | SVIL  | SYSTM |
| 82_1022  | LEIQ  | AARP  | FFRAL | ITAS  | SVIL  | SYSTM |
| 83_9813  | LEIQ  | AARP  | FFRAL | ITAS  | SVIL  | SYSTM |
| 84_1902  | LEIQ  | AARP  | FFRAL | ITAS  | SVIL  | SYSTM |
| 85_5152  | LEIQ  | AARP  | FFRAL | ITAS  | SVIL  | SYSTM |
| 86_3385  | LEIQ  | AARP  | FFRAL | ITAS  | SVIL  | SYSTM |
| 87_10760 | LEIQ  | AARP  | FFRAL | ITAS  | SVIL  | SYSTM |
| 88_1588  | LEIQ  | AARP  | FFRAL | ITAS  | SVIL  | SYSTM |
| 89_1609  | LEIQ  | AARP  | FFRAL | ITAS  | SVIL  | SYSTM |
| 90_4023  | LEIQ  | AARP  | FFRAL | ITAS  | SVIL  | SYSTM |

|          | 550                  | 560     | 570        | 580    | 590      | 600      |
|----------|----------------------|---------|------------|--------|----------|----------|
| 1_4160   | GSPLVHLFQAMPALGSAHGC | FERILAF | LKTPEKPLTI | KN     | ETMPESNR | GTKDASIQ |
| 2_6143   | GSPLVHLFQAMPALGSAHGC | FERILAF | LKTPEKPLTI | KN     | ETMPESNR | GTKDASIQ |
| 3_6554   | GSPLVHLFQAMPALGSAHGC | FERILAF | LKTPEKPLTI | KN     | ETMPESNR | GTKDASIQ |
| 4_111    | GSPLVHLFQAMPALGSAHGC | FERILAF | LKTPEKPLTI | KN     | ETMPESNR | GTKDASIQ |
| 5_5742   | GSPLVHLFQAMPALGSAHGC | FERILAF | LKTPEKPLTI | KN     | ETMPESNR | GTKDASIQ |
| 6_9490   | GSPLVHLFQAMPALGSAHGC | FERILAF | LKTPEKPLTI | KN     | ETMPESNR | GTKDASIQ |
| 7_6313   | GETAAGLSVIRANGWLGP   | MRGKFDE | KLDRSQEP   | FYLLYM | VQRWLQ   | LVNLVVA  |
| 8_2552   | GSPLVHLFQAMPALGSAHGC | FERILAF | LKTPEKPLTI | KN     | ETMPESNR | GTKDASIQ |
| 9_7745   | GSPLVHLFQAMPALGSAHGC | FERILAF | LKTPEKPLTI | KN     | ETMPESNR | GTKDASIQ |
| 10_2315  | GSPLVHLFQAMPALGSAHGC | FERILAF | LKTPEKPLTI | KN     | ETMPESNR | GTKDASIQ |
| 11_2035  | GSPLVHLFQAMPALGSAHGC | FERILAF | LKTPEKPLTI | KN     | ETMPESNR | GTKDASIQ |
| 12_9640  | GSPLVHLFQAMPALGSAHGC | FERILAF | LKTPEKPLTI | KN     | ETMPESNR | GTKDASIQ |
| 13_3674  | GSPLVHLFQAMPALGSAHGC | FERILAF | LKTPEKPLTI | KN     | ETMPESNR | GTKDASIQ |
| 14_6548  | GSPLVHLFQAMPALGSAHGC | FERILAF | LKTPEKPLTI | KN     | ETMPESNR | GTKDASIQ |
| 15_10828 | GSPLVHLFQAMPALGSAHGC | FERILAF | LKTPEKPLTI | KN     | ETMPESNR | GTKDASIQ |
| 16_6578  | GSPLVHLFQAMPALGSAHGC | FERILAF | LKTPEKPLTI | KN     | ETMPESNR | GTKDASIQ |
| 17_10233 | GSPLVHLFQAMPALGSAHGC | FERILAF | LKTPEKPLTI | KN     | ETMPESNR | GTKDASIQ |
| 18_9261  | GSPLVHLFQAMPALGSAHGC | FERILAF | LKTPEKPLTI | KN     | ETMPESNR | GTKDASIQ |
| 19_8450  | GSPLVHLFQAMPALGSAHGC | FERILAF | LKTPEKPLTI | KN     | ETMPESNR | GTKDASIQ |
| 20_1727  | GSPLVHLFQAMPALGSAHGC | FERILAF | LKTPEKPLTI | KN     | ETMPESNR | GTKDASIQ |
| 21_206   | GSPLVHLFQAMPALGSAHGC | FERILAF | LKTPEKPLTI | KN     | ETMPESNR | GTKDASIQ |
| 22_7439  | GSPLVHLFQAMPALGSAHGC | FERILAF | LKTPEKPLTI | KN     | ETMPESNR | GTKDASIQ |
| 23_3780  | GSPLVHLFQAMPALGSAHGC | FERILAF | LKTPEKPLTI | KN     | ETMPESNR | GTKDASIQ |
| 24_967   | GSPLVHLFQAMPALGSAHGC | FERILAF | LKTPEKPLTI | KN     | ETMPESNR | GTKDASIQ |
| 25_6595  | GSPLVHLFQAMPALGSAHGC | FERILAF | LKTPEKPLTI | KN     | ETMPESNR | GTKDASIQ |
| 26_8391  | GSPLVHLFQAMPALGSAHGC | FERILAF | LKTPEKPLTI | KN     | ETMPESNR | GTKDASIQ |
| 27_8170  | GSPLVHLFQAMPALGSAHGC | FERILAF | LKTPEKPLTI | KN     | ETMPESNR | GTKDASIQ |
| 28_5209  | GSPLVHLFQAMPALGSAHGC | FERILAF | LKTPEKPLTI | KN     | ETMPESNR | GTKDASIQ |
| 29_2181  | GSPLVHLFQAMPALGSAHGC | FERILAF | LKTPEKPLTI | KN     | ETMPESNR | GTKDASIQ |
| 30_8564  | GSPLVHLFQAMPALGSAHGC | FERILAF | LKTPEKPLTI | KN     | ETMPESNR | GTKDASIQ |
| 31_1582  | GSPLVHLFQAMPALGSAHGC | FERILAF | LKTPEKPLTI | KN     | ETMPESNR | GTKDASIQ |
| 32_4537  | GSPLVHLFQAMPALGSAHGC | FERILAF | LKTPEKPLTI | KN     | ETMPESNR | GTKDASIQ |
| 33_9418  | GSPLVHLFQAMPALGSAHGC | FERILAF | LKTPEKPLTI | KN     | ETMPESNR | GTKDASIQ |
| 34_1782  | GSPLVHLFQAMPALGSAHGC | FERILAF | LKTPEKPLTI | KN     | ETMPESNR | GTKDASIQ |
| 35_10360 | GSPLVHLFQAMPALGSAHGC | FERILAF | LKTPEKPLTI | KN     | ETMPESNR | GTKDASIQ |
| 36_468   | GSPLVHLFQAMPALGSAHGC | FERILAF | LKTPEKPLTI | KN     | ETMPESNR | GTKDASIQ |
| 37_4956  | GSPLVHLFQAMPALGSAHGC | FERILAF | LKTPEKPLTI | KN     | ETMPESNR | GTKDASIQ |
| 38_4305  | GSPLVHLFQAMPALGSAHGC | FERILAF | LKTPEKPLTI | KN     | ETMPESNR | GTKDASIQ |
| 39_4737  | GSPLVHLFQAMPALGSAHGC | FERILAF | LKTPEKPLTI | KN     | ETMPESNR | GTKDASIQ |
| 40_9543  | GSPLVHLFQAMPALGSAHGC | FERILAF | LKTPEKPLTI | KN     | ETMPESNR | GTKDASIQ |
| 41_6669  | GSPLVHLFQAMPALGSAHGC | FERILAF | LKTPEKPLTI | KN     | ETMPESNR | GTKDASIQ |
| 42_10558 | GSPLVHLFQAMPALGSAHGC | FERILAF | LKTPEKPLTI | KN     | ETMPESNR | GTKDASIQ |
| 43_8051  | GSPLVHLFQAMPALGSAHGC | FERILAF | LKTPEKPLTI | KN     | ETMPESNR | GTKDASIQ |
| 44_10454 | GSPLVHLFQAMPALGSAHGC | FERILAF | LKTPEKPLTI | KN     | ETMPESNR | GTKDASIQ |
| 45_10126 | GSPLVHLFQAMPALGSAHGC | FERILAF | LKTPEKPLTI | KN     | ETMPESNR | GTKDASIQ |
| 46_1547  | GSPLVHLFQAMPALGSAHGC | FERILAF | LKTPEKPLTI | KN     | ETMPESNR | GTKDASIQ |
| 47_6749  | GSPLVHLFQAMPALGSAHGC | FERILAF | LKTPEKPLTI | KN     | ETMPESNR | GTKDASIQ |
| 48_9982  | GSPLVHLFQAMPALGSAHGC | FERILAF | LKTPEKPLTI | KN     | ETMPESNR | GTKDASIQ |
| 49_7293  | GSPLVHLFQAMPALGSAHGC | FERILAF | LKTPEKPLTI | KN     | ETMPESNR | GTKDASIQ |
| 50_5993  | GSPLVHLFQAMPALGSAHGC | FERILAF | LKTPEKPLTI | KN     | ETMPESNR | GTKDASIQ |
| 51_4791  | GSPLVHLFQAMPALGSAHGC | FERILAF | LKTPEKPLTI | KN     | ETMPESNR | GTKDASIQ |
| 52_121   | GSPLVHLFQAMPALGSAHGC | FERILAF | LKTPEKPLTI | KN     | ETMPESNR | GTKDASIQ |
| 53_1667  | GSPLVHLFQAMPALGSAHGC | FERILAF | LKTPEKPLTI | KN     | ETMPESNR | GTKDASIQ |
| 54_10488 | GSPLVHLFQAMPALGSAHGC | FERILAF | LKTPEKPLTI | KN     | ETMPESNR | GTKDASIQ |
| 55_7733  | GSPLVHLFQAMPALGSAHGC | FERILAF | LKTPEKPLTI | KN     | ETMPESNR | GTKDASIQ |
| 56_3982  | GSPLVHLFQAMPALGSAHGC | FERILAF | LKTPEKPLTI | KN     | ETMPESNR | GTKDASIQ |
| 57_392   | GSPLVHLFQAMPALGSAHGC | FERILAF | LKTPEKPLTI | KN     | ETMPESNR | GTKDASIQ |
| 58_10291 | GSPLVHLFQAMPALGSAHGC | FERILAF | LKTPEKPLTI | KN     | ETMPESNR | GTKDASIQ |
| 59_5792  | GSPLVHLFQAMPALGSAHGC | FERILAF | LKTPEKPLTI | KN     | ETMPESNR | GTKDASIQ |
| 60_8712  | GSPLVHLFQAMPALGSAHGC | FERILAF | LKTPEKPLTI | KN     | ETMPESNR | GTKDASIQ |
| 61_6716  | GSPLVHLFQAMPALGSAHGC | FERILAF | LKTPEKPLTI | KN     | ETMPESNR | GTKDASIQ |
| 62_5599  | GSPLVHLFQAMPALGSAHGC | FERILAF | LKTPEKPLTI | KN     | ETMPESNR | GTKDASIQ |
| 63_304   | GSPLVHLFQAMPALGSAHGC | FERILAF | LKTPEKPLTI | KN     | ETMPESNR | GTKDASIQ |
| 64_10473 | .....                | .....   | .....      | .....  | .....    | .....    |
| 65_6310  | GSPLVHLFQAMPALGSAHGC | FERILAF | LKTPEKPLTI | KN     | ETMPESNR | GTKDASIQ |
| 66_8714  | GSPLVHLFQAMPALGSAHGC | FERILAF | LKTPEKPLTI | KN     | ETMPESNR | GTKDASIQ |
| 67_2350  | GSPLVHLFQAMPALGSAHGC | FERILAF | LKTPEKPLTI | KN     | ETMPESNR | GTKDASIQ |
| 68_2447  | GSPLVHLFQAMPALGSAHGC | FERILAF | LKTPEKPLTI | KN     | ETMPESNR | GTKDASIQ |
| 69_5658  | GSPLVHLFQAMPALGSAHGC | FERILAF | LKTPEKPLTI | KN     | ETMPESNR | GTKDASIQ |
| 70_1277  | GSPLVHLFQAMPALGSAHGC | FERILAF | LKTPEKPLTI | KN     | ETMPESNR | GTKDASIQ |
| 71_3717  | GSPLVHLFQAMPALGSAHGC | FERILAF | LKTPEKPLTI | KN     | ETMPESNR | GTKDASIQ |
| 72_7846  | GSPLVHLFQAMPALGSAHGC | FERILAF | LKTPEKPLTI | KN     | ETMPESNR | GTKDASIQ |
| 73_10528 | GSPLVHLFQAMPALGSAHGC | FERILAF | LKTPEKPLTI | KN     | ETMPESNR | GTKDASIQ |
| 74_4899  | GSPLVHLFQAMPALGSAHGC | FERILAF | LKTPEKPLTI | KN     | ETMPESNR | GTKDASIQ |
| 75_5507  | GSPLVHLFQAMPALGSAHGC | FERILAF | LKTPEKPLTI | KN     | ETMPESNR | GTKDASIQ |
| 76_5432  | GSPLVHLFQAMPALGSAHGC | FERILAF | LKTPEKPLTI | KN     | ETMPESNR | GTKDASIQ |
| 77_10770 | GSPLVHLFQAMPALGSAHGC | FERILAF | LKTPEKPLTI | KN     | ETMPESNR | GTKDASIQ |
| 78_5904  | GSPLVHLFQAMPALGSAHGC | FERILAF | LKTPEKPLTI | KN     | ETMPESNR | GTKDASIQ |
| 79_9653  | GSPLVHLFQAMPALGSAHGC | FERILAF | LKTPEKPLTI | KN     | ETMPESNR | GTKDASIQ |
| 80_4462  | GSPLVHLFQAMPALGSAHGC | FERILAF | LKTPEKPLTI | KN     | ETMPESNR | GTKDASIQ |
| 81_7194  | GSPLVHLFQAMPALGSAHGC | FERILAF | LKTPEKPLTI | KN     | ETMPESNR | GTKDASIQ |
| 82_1022  | GSPLVHLFQAMPALGSAHGC | FERILAF | LKTPEKPLTI | KN     | ETMPESNR | GTKDASIQ |
| 83_9813  | GSPLVHLFQAMPALGSAHGC | FERILAF | LKTPEKPLTI | KN     | ETMPESNR | GTKDASIQ |
| 84_1902  | GSPLVHLFQAMPALGSAHGC | FERILAF | LKTPEKPLTI | KN     | ETMPESNR | GTKDASIQ |
| 85_5152  | GSPLVHLFQAMPALGSAHGC | FERILAF | LKTPEKPLTI | KN     | ETMPESNR | GTKDASIQ |
| 86_3385  | GSPLVHLFQAMPALGSAHGC | FERILAF | LKTPEKPLTI | KN     | ETMPESNR | GTKDASIQ |
| 87_10760 | GSPLVHLFQAMPALGSAHGC | FERILAF | LKTPEKPLTI | KN     | ETMPESNR | GTKDASIQ |
| 88_1588  | GSPLVHLFQAMPALGSAHGC | FERILAF | LKTPEKPLTI | KN     | ETMPESNR | GTKDASIQ |
| 89_1609  | GSPLVHLFQAMPALGSAHGC | FERILAF | LKTPEKPLTI | KN     | ETMPESNR | GTKDASIQ |
| 90_4023  | GSPLVHLFQAMPALGSAHGC | FERILAF | LKTPEKPLTI | KN     | ETMPESNR | GTKDASIQ |

|          | 610                     | 620                     | 630                     | 640 | 650 | 660 |
|----------|-------------------------|-------------------------|-------------------------|-----|-----|-----|
| 1_4160   | ANETALSIRHASIGWSPDEPVLK | DINLQIQKGSFVALVGKTGSGK  | SLLLKSAIGEGGHVS         |     |     |     |
| 2_6143   | ANETALSIRHASIGWSPDEPVLK | DINLQIQKGSFVALVGKTGSGK  | SLLLKSAIGEGGHVS         |     |     |     |
| 3_6554   | ANETALSIRHASIGWSPDEPVLK | DINLQIQKGSFVALVGKTGSGK  | SLLLKSAIGEGGHVS         |     |     |     |
| 4_111    | ANETALSIRHASIGWSPDEPVLK | DINLQIQKGSFVALVGKTGSGK  | SLLLKSAIGEGGHVS         |     |     |     |
| 5_5742   | ANETALSIRHASIGWSPDEPVLK | DINLQIQKGSFVALVGKTGSGK  | SLLLKSAIGEGGHVS         |     |     |     |
| 6_9490   | ANETALSIRHASIGWSPDEPVLK | DINLQIQKGSFVALVGKTGSGK  | SLLLKSAIGEGGHVS         |     |     |     |
| 7_6313   | GVAIGLREQVAAA           | AVGVALINTTTLGETLTNFIVSW | TSLTSLGAIARVCAFEQDTPRER |     |     |     |
| 8_2552   | ANETALSIRHASIGWSPDEPVLK | DINLQIQKGSFVALVGKTGSGK  | SLLLKSAIGEGGHVS         |     |     |     |
| 9_7745   | ANETALSIRHASIGWSPDEPVLK | DINLQIQKGSFVALVGKTGSGK  | SLLLKSAIGEGGHVS         |     |     |     |
| 10_2315  | ANETALSIRHASIGWSPDEPVLK | DINLQIQKGSFVALVGKTGSGK  | SLLLKSAIGEGGHVS         |     |     |     |
| 11_2035  | ANETALSIRHASIGWSPDEPVLK | DINLQIQKGSFVALVGKTGSGK  | SLLLKSAIGEGGHVS         |     |     |     |
| 12_9640  | ANETALSIRHASIGWSPDEPVLK | DINLQIQKGSFVALVGKTGSGK  | SLLLKSAIGEGGHVS         |     |     |     |
| 13_3674  | ANETALSIRHASIGWSPDEPVLK | DINLQIQKGSFVALVGKTGSGK  | SLLLKSAIGEGGHVS         |     |     |     |
| 14_6548  | ANETALSIRHASIGWSPDEPVLK | DINLQIQKGSFVALVGKTGSGK  | SLLLKSAIGEGGHVS         |     |     |     |
| 15_10828 | ANETALSIRHASIGWSPDEPVLK | DINLQIQKGSFVALVGKTGSGK  | SLLLKSAIGEGGHVS         |     |     |     |
| 16_6578  | ANETALSIRHASIGWSPDEPVLK | DINLQIQKGSFVALVGKTGSGK  | SLLLKSAIGEGGHVS         |     |     |     |
| 17_10233 | ANETALSIRHASIGWSPDEPVLK | DINLQIQKGSFVALVGKTGSGK  | SLLLKSAIGEGGHVS         |     |     |     |
| 18_9261  | ANETALSIRHASIGWSPDEPVLK | DINLQIQKGSFVALVGKTGSGK  | SLLLKSAIGEGGHVS         |     |     |     |
| 19_8450  | ANETALSIRHASIGWSPDEPVLK | DINLQIQKGSFVALVGKTGSGK  | SLLLKSAIGEGGHVS         |     |     |     |
| 20_1727  | ANETALSIRHASIGWSPDEPVLK | DINLQIQKGSFVALVGKTGSGK  | SLLLKSAIGEGGHVS         |     |     |     |
| 21_206   | ANETALSIRHASIGWSPDEPVLK | DINLQIQKGSFVALVGKTGSGK  | SLLLKSAIGEGGHVS         |     |     |     |
| 22_7439  | ANETALSIRHASIGWSPDEPVLK | DINLQIQKGSFVALVGKTGSGK  | SLLLKSAIGEGGHVS         |     |     |     |
| 23_3780  | ANETALSIRHASIGWSPDEPVLK | DINLQIQKGSFVALVGKTGSGK  | SLLLKSAIGEGGHVS         |     |     |     |
| 24_967   | ANETALSIRHASIGWSPDEPVLK | DINLQIQKGSFVALVGKTGSGK  | SLLLKSAIGEGGHVS         |     |     |     |
| 25_6595  | ANETALSIRHASIGWSPDEPVLK | DINLQIQKGSFVALVGKTGSGK  | SLLLKSAIGEGGHVS         |     |     |     |
| 26_8391  | ANETALSIRHASIGWSPDEPVLK | DINLQIQKGSFVALVGKTGSGK  | SLLLKSAIGEGGHVS         |     |     |     |
| 27_8170  | ANETALSIRHASIGWSPDEPVLK | DINLQIQKGSFVALVGKTGSGK  | SLLLKSAIGEGGHVS         |     |     |     |
| 28_5209  | ANETALSIRHASIGWSPDEPVLK | DINLQIQKGSFVALVGKTGSGK  | SLLLKSAIGEGGHVS         |     |     |     |
| 29_2181  | ANETALSIRHASIGWSPDEPVLK | DINLQIQKGSFVALVGKTGSGK  | SLLLKSAIGEGGHVS         |     |     |     |
| 30_8564  | ANETALSIRHASIGWSPDEPVLK | DINLQIQKGSFVALVGKTGSGK  | SLLLKSAIGEGGHVS         |     |     |     |
| 31_1582  | ANETALSIRHASIGWSPDEPVLK | DINLQIQKGSFVALVGKTGSGK  | SLLLKSAIGEGGHVS         |     |     |     |
| 32_4537  | ANETALSIRHASIGWSPDEPVLK | DINLQIQKGSFVALVGKTGSGK  | SLLLKSAIGEGGHVS         |     |     |     |
| 33_9418  | ANETALSIRHASIGWSPDEPVLK | DINLQIQKGSFVALVGKTGSGK  | SLLLKSAIGEGGHVS         |     |     |     |
| 34_1782  | ANETALSIRHASIGWSPDEPVLK | DINLQIQKGSFVALVGKTGSGK  | SLLLKSAIGEGGHVS         |     |     |     |
| 35_10360 | ANETALSIRHASIGWSPDEPVLK | DINLQIQKGSFVALVGKTGSGK  | SLLLKSAIGEGGHVS         |     |     |     |
| 36_468   | ANETALSIRHASIGWSPDEPVLK | DINLQIQKGSFVALVGKTGSGK  | SLLLKSAIGEGGHVS         |     |     |     |
| 37_4956  | ANETALSIRHASIGWSPDEPVLK | DINLQIQKGSFVALVGKTGSGK  | SLLLKSAIGEGGHVS         |     |     |     |
| 38_4305  | ANETALSIRHASIGWSPDEPVLK | DINLQIQKGSFVALVGKTGSGK  | SLLLKSAIGEGGHVS         |     |     |     |
| 39_4737  | ANETALSIRHASIGWSPDEPVLK | DINLQIQKGSFVALVGKTGSGK  | SLLLKSAIGEGGHVS         |     |     |     |
| 40_9543  | ANETALSIRHASIGWSPDEPVLK | DINLQIQKGSFVALVGKTGSGK  | SLLLKSAIGEGGHVS         |     |     |     |
| 41_6669  | ANETALSIRHASIGWSPDEPVLK | DINLQIQKGSFVALVGKTGSGK  | SLLLKSAIGEGGHVS         |     |     |     |
| 42_10558 | ANETALSIRHASIGWSPDEPVLK | DINLQIQKGSFVALVGKTGSGK  | SLLLKSAIGEGGHVS         |     |     |     |
| 43_8051  | ANETALSIRHASIGWSPDEPVLK | DINLQIQKGSFVALVGKTGSGK  | SLLLKSAIGEGGHVS         |     |     |     |
| 44_10454 | ANETALSIRHASIGWSPDEPVLK | DINLQIQKGSFVALVGKTGSGK  | SLLLKSAIGEGGHVS         |     |     |     |
| 45_10126 | ANETALSIRHASIGWSPDEPVLK | DINLQIQKGSFVALVGKTGSGK  | SLLLKSAIGEGGHVS         |     |     |     |
| 46_1547  | ANETALSIRHASIGWSPDEPVLK | DINLQIQKGSFVALVGKTGSGK  | SLLLKSAIGEGGHVS         |     |     |     |
| 47_6749  | ANETALSIRHASIGWSPDEPVLK | DINLQIQKGSFVALVGKTGSGK  | SLLLKSAIGEGGHVS         |     |     |     |
| 48_9982  | ANETALSIRHASIGWSPDEPVLK | DINLQIQKGSFVALVGKTGSGK  | SLLLKSAIGEGGHVS         |     |     |     |
| 49_7293  | ANETALSIRHASIGWSPDEPVLK | DINLQIQKGSFVALVGKTGSGK  | SLLLKSAIGEGGHVS         |     |     |     |
| 50_5993  | ANETALSIRHASIGWSPDEPVLK | DINLQIQKGSFVALVGKTGSGK  | SLLLKSAIGEGGHVS         |     |     |     |
| 51_4791  | ANETALSIRHASIGWSPDEPVLK | DINLQIQKGSFVALVGKTGSGK  | SLLLKSAIGEGGHVS         |     |     |     |
| 52_121   | ANETALSIRHASIGWSPDEPVLK | DINLQIQKGSFVALVGKTGSGK  | SLLLKSAIGEGGHVS         |     |     |     |
| 53_1667  | ANETALSIRHASIGWSPDEPVLK | DINLQIQKGSFVALVGKTGSGK  | SLLLKSAIGEGGHVS         |     |     |     |
| 54_10488 | ANETALSIRHASIGWSPDEPVLK | DINLQIQKGSFVALVGKTGSGK  | SLLLKSAIGEGGHVS         |     |     |     |
| 55_7733  | ANETALSIRHASIGWSPDEPVLK | DINLQIQKGSFVALVGKTGSGK  | SLLLKSAIGEGGHVS         |     |     |     |
| 56_3982  | ANETALSIRHASIGWSPDEPVLK | DINLQIQKGSFVALVGKTGSGK  | SLLLKSAIGEGGHVS         |     |     |     |
| 57_392   | ANETALSIRHASIGWSPDEPVLK | DINLQIQKGSFVALVGKTGSGK  | SLLLKSAIGEGGHVS         |     |     |     |
| 58_10291 | ANETALSIRHASIGWSPDEPVLK | DINLQIQKGSFVALVGKTGSGK  | SLLLKSAIGEGGHVS         |     |     |     |
| 59_5792  | ANETALSIRHASIGWSPDEPVLK | DINLQIQKGSFVALVGKTGSGK  | SLLLKSAIGEGGHVS         |     |     |     |
| 60_8712  | ANETALSIRHASIGWSPDEPVLK | DINLQIQKGSFVALVGKTGSGK  | SLLLKSAIGEGGHVS         |     |     |     |
| 61_6716  | ANETALSIRHASIGWSPDEPVLK | DINLQIQKGSFVALVGKTGSGK  | SLLLKSAIGEGGHVS         |     |     |     |
| 62_5599  | ANETALSIRHASIGWSPDEPVLK | DINLQIQKGSFVALVGKTGSGK  | SLLLKSAIGEGGHVS         |     |     |     |
| 63_304   | ANETALSIRHASIGWSPDEPVLK | DINLQIQKGSFVALVGKTGSGK  | SLLLKSAIGEGGHVS         |     |     |     |
| 64_10473 | .....                   | .....                   | .....                   |     |     |     |
| 65_6310  | ANETALSIRHASIGWSPDEPVLK | DINLQIQKGSFVALVGKTGSGK  | SLLLKSAIGEGGHVS         |     |     |     |
| 66_8714  | ANETALSIRHASIGWSPDEPVLK | DINLQIQKGSFVALVGKTGSGK  | SLLLKSAIGEGGHVS         |     |     |     |
| 67_2350  | ANETALSIRHASIGWSPDEPVLK | DINLQIQKGSFVALVGKTGSGK  | SLLLKSAIGEGGHVS         |     |     |     |
| 68_2447  | ANETALSIRHASIGWSPDEPVLK | DINLQIQKGSFVALVGKTGSGK  | SLLLKSAIGEGGHVS         |     |     |     |
| 69_5658  | ANETALSIRHASIGWSPDEPVLK | DINLQIQKGSFVALVGKTGSGK  | SLLLKSAIGEGGHVS         |     |     |     |
| 70_1277  | ANETALSIRHASIGWSPDEPVLK | DINLQIQKGSFVALVGKTGSGK  | SLLLKSAIGEGGHVS         |     |     |     |
| 71_3717  | ANETALSIRHASIGWSPDEPVLK | DINLQIQKGSFVALVGKTGSGK  | SLLLKSAIGEGGHVS         |     |     |     |
| 72_7846  | ANETALSIRHASIGWSPDEPVLK | DINLQIQKGSFVALVGKTGSGK  | SLLLKSAIGEGGHVS         |     |     |     |
| 73_10528 | ANETALSIRHASIGWSPDEPVLK | DINLQIQKGSFVALVGKTGSGK  | SLLLKSAIGEGGHVS         |     |     |     |
| 74_4899  | ANETALSIRHASIGWSPDEPVLK | DINLQIQKGSFVALVGKTGSGK  | SLLLKSAIGEGGHVS         |     |     |     |
| 75_5507  | ANETALSIRHASIGWSPDEPVLK | DINLQIQKGSFVALVGKTGSGK  | SLLLKSAIGEGGHVS         |     |     |     |
| 76_5432  | ANETALSIRHASIGWSPDEPVLK | DINLQIQKGSFVALVGKTGSGK  | SLLLKSAIGEGGHVS         |     |     |     |
| 77_10770 | ANETALSIRHASIGWSPDEPVLK | DINLQIQKGSFVALVGKTGSGK  | SLLLKSAIGEGGHVS         |     |     |     |
| 78_5904  | ANETALSIRHASIGWSPDEPVLK | DINLQIQKGSFVALVGKTGSGK  | SLLLKSAIGEGGHVS         |     |     |     |
| 79_9653  | ANETALSIRHASIGWSPDEPVLK | DINLQIQKGSFVALVGKTGSGK  | SLLLKSAIGEGGHVS         |     |     |     |
| 80_4462  | ANETALSIRHASIGWSPDEPVLK | DINLQIQKGSFVALVGKTGSGK  | SLLLKSAIGEGGHVS         |     |     |     |
| 81_7194  | ANETALSIRHASIGWSPDEPVLK | DINLQIQKGSFVALVGKTGSGK  | SLLLKSAIGEGGHVS         |     |     |     |
| 82_1022  | ANETALSIRHASIGWSPDEPVLK | DINLQIQKGSFVALVGKTGSGK  | SLLLKSAIGEGGHVS         |     |     |     |
| 83_9813  | ANETALSIRHASIGWSPDEPVLK | DINLQIQKGSFVALVGKTGSGK  | SLLLKSAIGEGGHVS         |     |     |     |
| 84_1902  | ANETALSIRHASIGWSPDEPVLK | DINLQIQKGSFVALVGKTGSGK  | SLLLKSAIGEGGHVS         |     |     |     |
| 85_5152  | ANETALSIRHASIGWSPDEPVLK | DINLQIQKGSFVALVGKTGSGK  | SLLLKSAIGEGGHVS         |     |     |     |
| 86_3385  | ANETALSIRHASIGWSPDEPVLK | DINLQIQKGSFVALVGKTGSGK  | SLLLKSAIGEGGHVS         |     |     |     |
| 87_10760 | ANETALSIRHASIGWSPDEPVLK | DINLQIQKGSFVALVGKTGSGK  | SLLLKSAIGEGGHVS         |     |     |     |
| 88_1588  | ANETALSIRHASIGWSPDEPVLK | DINLQIQKGSFVALVGKTGSGK  | SLLLKSAIGEGGHVS         |     |     |     |
| 89_1609  | ANETALSIRHASIGWSPDEPVLK | DINLQIQKGSFVALVGKTGSGK  | SLLLKSAIGEGGHVS         |     |     |     |
| 90_4023  | ANETALSIRHASIGWSPDEPVLK | DINLQIQKGSFVALVGKTGSGK  | SLLLKSAIGEGGHVS         |     |     |     |

|          | 670                              | 680                           | 690   | 700 | 710 | 720 |
|----------|----------------------------------|-------------------------------|-------|-----|-----|-----|
| 1_4160   | GSIDISLDKVVAYCSQSPWLENISAEHTWTQF | GESGDAKWLAGVIDACCLDDLTGLP     | DYRT  |     |     |     |
| 2_6143   | GSIDISLDKVVAYCSQSPWLENISAEHTWTQF | GESGDAKWLAGVIDACCLDDLTGLP     | DYRT  |     |     |     |
| 3_6554   | GSIDISLDKVVAYCSQSPWLENISAEHTWTQF | GESGDAKWLAGVIDACCLDDLTGLP     | DYRT  |     |     |     |
| 4_111    | GSIDISLDKVVAYCSQSPWLENISAEHTWTQF | GESGDAKWLAGVIDACCLDDLTGLP     | DYRT  |     |     |     |
| 5_5742   | GSIDISLDKVVAYCSQSPWLENISAEHTWTQF | GESGDAKWLAGVIDACCLDDLTGLP     | DYRT  |     |     |     |
| 6_9490   | GSIDISLDKVVAYCSQSPWLENISAEHTWTQF | GESGDAKWLAGVIDACCLDDLTGLP     | DYRT  |     |     |     |
| 7_6313   | EEPATTDLPDNPWGAGQISFENVWATYDEEG  | CDGNWGLSGITLGIQPGERVAVCGRTGSG |       |     |     |     |
| 8_2552   | GSIDISLDKVVAYCSQSPWLENISAEHTWTQF | GESGDAKWLAGVIDACCLDDLTGLP     | DYRT  |     |     |     |
| 9_7745   | GSIDISLDKVVAYCSQSPWLENISAEHTWTQF | GESGDAKWLAGVIDACCLDDLTGLP     | DYRT  |     |     |     |
| 10_2315  | GSIDISLDKVVAYCSQSPWLENISAEHTWTQF | GESGDAKWLAGVIDACCLDDLTGLP     | DYRT  |     |     |     |
| 11_2035  | GSIDISLDKVVAYCSQSPWLENISAEHTWTQF | GESGDAKWLAGVIDACCLDDLTGLP     | DYRT  |     |     |     |
| 12_9640  | GSIDISLDKVVAYCSQSPWLENISAEHTWTQF | GESGDAKWLAGVIDACCLDDLTGLP     | DYRT  |     |     |     |
| 13_3674  | GSIDISLDKVVAYCSQSPWLENISAEHTWTQF | GESGDAKWLAGVIDACCLDDLTGLP     | DYRT  |     |     |     |
| 14_6548  | GSIDISLDKVVAYCSQSPWLENISAEHTWTQF | GESGDAKWLAGVIDACCLDDLTGLP     | DYRT  |     |     |     |
| 15_10828 | GSIDISLDKVVAYCSQSPWLENISAEHTWTQF | GESGDAKWLAGVIDACCLDDLTGLP     | DYRT  |     |     |     |
| 16_6578  | GSIDISLDKVVAYCSQSPWLENISAEHTWTQF | GESGDAKWLAGVIDACCLDDLTGLP     | DYRT  |     |     |     |
| 17_10233 | GSIDISLDKVVAYCSQSPWLENISAEHTWTQF | GESGDAKWLAGVIDACCLDDLTGLP     | DYRT  |     |     |     |
| 18_9261  | GSIDISLDKVVAYCSQSPWLENISAEHTWTQF | GESGDAKWLAGVIDACCLDDLTGLP     | DYRT  |     |     |     |
| 19_8450  | GSIDISLDKVVAYCSQSPWLENISAEHTWTQF | GESGDAKWLAGVIDACCLDDLTGLP     | DYRT  |     |     |     |
| 20_1727  | GSIDISLDKVVAYCSQSPWLENISAEHTWTQF | GESGDAKWLAGVIDACCLDDLTGLP     | DYRT  |     |     |     |
| 21_206   | GSIDISLDKVVAYCSQSPWLENISAEHTWTQF | GESGDAKWLAGVIDACCLDDLTGLP     | DYRT  |     |     |     |
| 22_7439  | GSIDISLDKVVAYCSQSPWLENISAEHTWTQF | GESGDAKWLAGVIDACCLDDLTGLP     | DYRT  |     |     |     |
| 23_3780  | GSIDISLDKVVAYCSQSPWLENISAEHTWTQF | GESGDAKWLAGVIDACCLDDLTGLP     | DYRT  |     |     |     |
| 24_967   | GSIDISLDKVVAYCSQSPWLENISAEHTWTQF | GESGDAKWLAGVIDACCLDDLTGLP     | DYRT  |     |     |     |
| 25_6595  | GSIDISLDKVVAYCSQSPWLENISAEHTWTQF | GESGDAKWLAGVIDACCLDDLTGLP     | DYRT  |     |     |     |
| 26_8391  | GSIDISLDKVVAYCSQSPWLENISAEHTWTQF | GESGDAKWLAGVIDACCLDDLTGLP     | DYRT  |     |     |     |
| 27_8170  | GSIDISLDKVVAYCSQSPWLENISAEHTWTQF | GESGDAKWLAGVIDACCLDDLTGLP     | DYRT  |     |     |     |
| 28_5209  | GSIDISLDKVVAYCSQSPWLENISAEHTWTQF | GESGDAKWLAGVIDACCLDDLTGLP     | DYRT  |     |     |     |
| 29_2181  | GSIDISLDKVVAYCSQSPWLENISAEHTWTQF | GESGDAKWLAGVIDACCLDDLTGLP     | DYRT  |     |     |     |
| 30_8564  | GSIDISLDKVVAYCSQSPWLENISAEHTWTQF | GESGDAKWLAGVIDACCLDDLTGLP     | DYRT  |     |     |     |
| 31_1582  | GSIDISLDKVVAYCSQSPWLENISAEHTWTQF | GESGDAKWLAGVIDACCLDDLTGLP     | DYRT  |     |     |     |
| 32_4537  | GSIDISLDKVVAYCSQSPWLENISAEHTWTQF | GESGDAKWLAGVIDACCLDDLTGLP     | DYRT  |     |     |     |
| 33_9418  | GSIDISLDKVVAYCSQSPWLENISAEHTWTQF | GESGDAKWLAGVIDACCLDDLTGLP     | DYRT  |     |     |     |
| 34_1782  | GSIDISLDKVVAYCSQSPWLENISAEHTWTQF | GESGDAKWLAGVIDACCLDDLTGLP     | DYRT  |     |     |     |
| 35_10360 | GSIDISLDKVVAYCSQSPWLENISAEHTWTQF | GESGDAKWLAGVIDACCLDDLTGLP     | DYRT  |     |     |     |
| 36_468   | GSIDISLDKVVAYCSQSPWLENISAEHTWTQF | GESGDAKWLAGVIDACCLDDLTGLP     | DYRT  |     |     |     |
| 37_4956  | GSIDISLDKVVAYCSQSPWLENISAEHTWTQF | GESGDAKWLAGVIDACCLDDLTGLP     | DYRT  |     |     |     |
| 38_4305  | GSIDISLDKVVAYCSQSPWLENISAEHTWTQF | GESGDAKWLAGVIDACCLDDLTGLP     | DYRT  |     |     |     |
| 39_4737  | GSIDISLDKVVAYCSQSPWLENISAEHTWTQF | GESGDAKWLAGVIDACCLDDLTGLP     | DYRT  |     |     |     |
| 40_9543  | GSIDISLDKVVAYCSQSPWLENISAEHTWTQF | GESGDAKWLAGVIDACCLDDLTGLP     | DYRT  |     |     |     |
| 41_6669  | GSIDISLDKVVAYCSQSPWLENISAEHTWTQF | GESGDAKWLAGVIDACCLDDLTGLP     | DYRT  |     |     |     |
| 42_10558 | GSIDISLDKVVAYCSQSPWLENISAEHTWTQF | GESGDAKWLAGVIDACCLDDLTGLP     | DYRT  |     |     |     |
| 43_8051  | GSIDISLDKVVAYCSQSPWLENISAEHTWTQF | GESGDAKWLAGVIDACCLDDLTGLP     | DYRT  |     |     |     |
| 44_10454 | GSIDISLDKVVAYCSQSPWLENISAEHTWTQF | GESGDAKWLAGVIDACCLDDLTGLP     | DYRT  |     |     |     |
| 45_10126 | GSIDISLDKVVAYCSQSPWLENISAEHTWTQF | GESGDAKWLAGVIDACCLDDLTGLP     | DYRT  |     |     |     |
| 46_1547  | GSIDISLDKVVAYCSQSPWLENISAEHTWTQF | GESGDAKWLAGVIDACCLDDLTGLP     | DYRT  |     |     |     |
| 47_6749  | GSIDISLDKVVAYCSQSPWLENISAEHTWTQF | GESGDAKWLAGVIDACCLDDLTGLP     | DYRT  |     |     |     |
| 48_9982  | GSIDISLDKVVAYCSQSPWLENISAEHTWTQF | GESGDAKWLAGVIDACCLDDLTGLP     | DYRT  |     |     |     |
| 49_7293  | GSIDISLDKVVAYCSQSPWLENISAEHTWTQF | GESGDAKWLAGVIDACCLDDLTGLP     | DYRT  |     |     |     |
| 50_5993  | GSIDISLDKVVAYCSQSPWLENISAEHTWTQF | GESGDAKWLAGVIDACCLDDLTGLP     | DYRT  |     |     |     |
| 51_4791  | GSIDISLDKVVAYCSQSPWLENISAEHTWTQF | GESGDAKWLAGVIDACCLDDLTGLP     | DYRT  |     |     |     |
| 52_121   | GSIDISLDKVVAYCSQSPWLENISAEHTWTQF | GESGDAKWLAGVIDACCLDDLTGLP     | DYRT  |     |     |     |
| 53_1667  | GSIDISLDKVVAYCSQSPWLENISAEHTWTQF | GESGDAKWLAGVIDACCLDDLTGLP     | DYRT  |     |     |     |
| 54_10488 | GSIDISLDKVVAYCSQSPWLENISAEHTWTQF | GESGDAKWLAGVIDACCLDDLTGLP     | DYRT  |     |     |     |
| 55_7733  | GSIDISLDKVVAYCSQSPWLENISAEHTWTQF | GESGDAKWLAGVIDACCLDDLTGLP     | DYRT  |     |     |     |
| 56_3982  | GSIDISLDKVVAYCSQSPWLENISAEHTWTQF | GESGDAKWLAGVIDACCLDDLTGLP     | DYRT  |     |     |     |
| 57_392   | GSIDISLDKVVAYCSQSPWLENISAEHTWTQF | GESGDAKWLAGVIDACCLDDLTGLP     | DYRT  |     |     |     |
| 58_10291 | GSIDISLDKVVAYCSQSPWLENISAEHTWTQF | GESGDAKWLAGVIDACCLDDLTGLP     | DYRT  |     |     |     |
| 59_5792  | GSIDISLDKVVAYCSQSPWLENISAEHTWTQF | GESGDAKWLAGVIDACCLDDLTGLP     | DYRT  |     |     |     |
| 60_8712  | GSIDISLDKVVAYCSQSPWLENISAEHTWTQF | GESGDAKWLAGVIDACCLDDLTGLP     | DYRT  |     |     |     |
| 61_6716  | GSIDISLDKVVAYCSQSPWLENISAEHTWTQF | GESGDAKWLAGVIDACCLDDLTGLP     | DYRT  |     |     |     |
| 62_5599  | GSIDISLDKVVAYCSQSPWLENISAEHTWTQF | GESGDAKWLAGVIDACCLDDLTGLP     | DYRT  |     |     |     |
| 63_304   | GSIDISLDKVVAYCSQSPWLENISAEHTWTQF | GESGDAKWLAGVIDACCLDDLTGLP     | DYRT  |     |     |     |
| 64_10473 | .....                            | .....                         | ..... |     |     |     |
| 65_6310  | GSIDISLDKVVAYCSQSPWLENISAEHTWTQF | GESGDAKWLAGVIDACCLDDLTGLP     | DYRT  |     |     |     |
| 66_8714  | GSIDISLDKVVAYCSQSPWLENISAEHTWTQF | GESGDAKWLAGVIDACCLDDLTGLP     | DYRT  |     |     |     |
| 67_2350  | GSIDISLDKVVAYCSQSPWLENISAEHTWTQF | GESGDAKWLAGVIDACCLDDLTGLP     | DYRT  |     |     |     |
| 68_2447  | GSIDISLDKVVAYCSQSPWLENISAEHTWTQF | GESGDAKWLAGVIDACCLDDLTGLP     | DYRT  |     |     |     |
| 69_5658  | GSIDISLDKVVAYCSQSPWLENISAEHTWTQF | GESGDAKWLAGVIDACCLDDLTGLP     | DYRT  |     |     |     |
| 70_1277  | GSIDISLDKVVAYCSQSPWLENISAEHTWTQF | GESGDAKWLAGVIDACCLDDLTGLP     | DYRT  |     |     |     |
| 71_3717  | GSIDISLDKVVAYCSQSPWLENISAEHTWTQF | GESGDAKWLAGVIDACCLDDLTGLP     | DYRT  |     |     |     |
| 72_7846  | GSIDISLDKVVAYCSQSPWLENISAEHTWTQF | GESGDAKWLAGVIDACCLDDLTGLP     | DYRT  |     |     |     |
| 73_10528 | GSIDISLDKVVAYCSQSPWLENISAEHTWTQF | GESGDAKWLAGVIDACCLDDLTGLP     | DYRT  |     |     |     |
| 74_4899  | GSIDISLDKVVAYCSQSPWLENISAEHTWTQF | GESGDAKWLAGVIDACCLDDLTGLP     | DYRT  |     |     |     |
| 75_5507  | GSIDISLDKVVAYCSQSPWLENISAEHTWTQF | GESGDAKWLAGVIDACCLDDLTGLP     | DYRT  |     |     |     |
| 76_5432  | GSIDISLDKVVAYCSQSPWLENISAEHTWTQF | GESGDAKWLAGVIDACCLDDLTGLP     | DYRT  |     |     |     |
| 77_10770 | GSIDISLDKVVAYCSQSPWLENISAEHTWTQF | GESGDAKWLAGVIDACCLDDLTGLP     | DYRT  |     |     |     |
| 78_5904  | GSIDISLDKVVAYCSQSPWLENISAEHTWTQF | GESGDAKWLAGVIDACCLDDLTGLP     | DYRT  |     |     |     |
| 79_9653  | GSIDISLDKVVAYCSQSPWLENISAEHTWTQF | GESGDAKWLAGVIDACCLDDLTGLP     | DYRT  |     |     |     |
| 80_4462  | GSIDISLDKVVAYCSQSPWLENISAEHTWTQF | GESGDAKWLAGVIDACCLDDLTGLP     | DYRT  |     |     |     |
| 81_7194  | GSIDISLDKVVAYCSQSPWLENISAEHTWTQF | GESGDAKWLAGVIDACCLDDLTGLP     | DYRT  |     |     |     |
| 82_1022  | GSIDISLDKVVAYCSQSPWLENISAEHTWTQF | GESGDAKWLAGVIDACCLDDLTGLP     | DYRT  |     |     |     |
| 83_9813  | GSIDISLDKVVAYCSQSPWLENISAEHTWTQF | GESGDAKWLAGVIDACCLDDLTGLP     | DYRT  |     |     |     |
| 84_1902  | GSIDISLDKVVAYCSQSPWLENISAEHTWTQF | GESGDAKWLAGVIDACCLDDLTGLP     | DYRT  |     |     |     |
| 85_5152  | GSIDISLDKVVAYCSQSPWLENISAEHTWTQF | GESGDAKWLAGVIDACCLDDLTGLP     | DYRT  |     |     |     |
| 86_3385  | GSIDISLDKVVAYCSQSPWLENISAEHTWTQF | GESGDAKWLAGVIDACCLDDLTGLP     | DYRT  |     |     |     |
| 87_10760 | GSIDISLDKVVAYCSQSPWLENISAEHTWTQF | GESGDAKWLAGVIDACCLDDLTGLP     | DYRT  |     |     |     |
| 88_1588  | GSIDISLDKVVAYCSQSPWLENISAEHTWTQF | GESGDAKWLAGVIDACCLDDLTGLP     | DYRT  |     |     |     |
| 89_1609  | GSIDISLDKVVAYCSQSPWLENISAEHTWTQF | GESGDAKWLAGVIDACCLDDLTGLP     | DYRT  |     |     |     |
| 90_4023  | GSIDISLDKVVAYCSQSPWLENISAEHTWTQF | GESGDAKWLAGVIDACCLDDLTGLP     | DYRT  |     |     |     |

|          | 730                       | 740                 | 750                | 760          | 770      | 780   |
|----------|---------------------------|---------------------|--------------------|--------------|----------|-------|
| 1_4160   | GRIGSGGARLSGGQKQRLALARAIA | TRKDIVLLDDVFSALDR   | TTKHHIATRLLGPEGLLR |              |          |       |
| 2_6143   | GRIGSGGARLSGGQKQRLALARAIA | TRKDIVLLDDVFSALDR   | TTKHHIATRLLGPEGLLR |              |          |       |
| 3_6554   | GRIGSGGARLSGGQKQRLALARAIA | TRKDIVLLDDVFSALDR   | TTKHHIATRLLGPEGLLR |              |          |       |
| 4_111    | GRIGSGGARLSGGQKQRLALARAIA | TRKDIVLLDDVFSALDR   | TTKHHIATRLLGPEGLLR |              |          |       |
| 5_5742   | GRIGSGGARLSGGQKQRLALARAIA | TRKDIVLLDDVFSALDR   | TTKHHIATRLLGPEGLLR |              |          |       |
| 6_9490   | GRIGSGGARLSGGQKQRLALARAIA | TRKDIVLLDDVFSALDR   | TTKHHIATRLLGPEGLLR |              |          |       |
| 7_6313   | KSTLLALLLGMHVPA           | GSIRLDDMDTSTLPI     | SVLRRRFTTVVSQDS    | SFF          | EPTSTFRQ | ELDPS |
| 8_2552   | GRIGSGGARLSGGQKQRLALARAIA | TRKDIVLLDDVFSALDR   | TTKHHIATRLLGPEGLLR |              |          |       |
| 9_7745   | GRIGSGGARLSGGQKQRLALARAIA | TRKDIVLLDDVFSALDR   | TTKHHIATRLLGPEGLLR |              |          |       |
| 10_2315  | GRIGSGGARLSGGQKQRLALARAIA | TRKDIVLLDDVFSALDR   | TTKHHIATRLLGPEGLLR |              |          |       |
| 11_2035  | GRIGSGGARLSGGQKQRLALARAIA | TRKDIVLLDDVFSALDR   | TTKHHIATRLLGPEGLLR |              |          |       |
| 12_9640  | GRIGSGGARLSGGQKQRLALARAIA | TRKDIVLLDDVFSALDR   | TTKHHIATRLLGPEGLLR |              |          |       |
| 13_3674  | GRIGSGGARLSGGQKQRLALARAIA | TRKDIVLLDDVFSALDR   | TTKHHIATRLLGPEGLLR |              |          |       |
| 14_6548  | GRIGSGGARLSGGQKQRLALARAIA | TRKDIVLLDDVFSALDR   | TTKHHIATRLLGPEGLLR |              |          |       |
| 15_10828 | GRIGSGGARLSGGQKQRLALARAIA | TRKDIVLLDDVFSALDR   | TTKHHIATRLLGPEGLLR |              |          |       |
| 16_6578  | GRIGSGGARLSGGQKQRLALARAIA | TRKDIVLLDDVFSALDR   | TTKHHIATRLLGPEGLLR |              |          |       |
| 17_10233 | GRIGSGGARLSGGQKQRLALARAIA | TRKDIVLLDDVFSALDR   | TTKHHIATRLLGPEGLLR |              |          |       |
| 18_9261  | GRIGSGGARLSGGQKQRLALARAIA | TRKDIVLLDDVFSALDR   | TTKHHIATRLLGPEGLLR |              |          |       |
| 19_8450  | GRIGSGGARLSGGQKQRLALARAIA | TRKDIVLLDDVFSALDR   | TTKHHIATRLLGPEGLLR |              |          |       |
| 20_1727  | GRIGSGGARLSGGQKQRLALARAIA | TRKDIVLLDDVFSALDR   | TTKHHIATRLLGPEGLLR |              |          |       |
| 21_206   | GRIGSGGARLSGGQKQRLALARAIA | TRKDIVLLDDVFSALDR   | TTKHHIATRLLGPEGLLR |              |          |       |
| 22_7439  | GRIGSGGARLSGGQKQRLALARAIA | TRKDIVLLDDVFSALDR   | TTKHHIATRLLGPEGLLR |              |          |       |
| 23_3780  | GRIGSGGARLSGGQKQRLALARAIA | TRKDIVLLDDVFSALDR   | TTKHHIATRLLGPEGLLR |              |          |       |
| 24_967   | GRIGSGGARLSGGQKQRLALARAIA | TRKDIVLLDDVFSALDR   | TTKHHIATRLLGPEGLLR |              |          |       |
| 25_6595  | GRIGSGGARLSGGQKQRLALARAIA | TRKDIVLLDDVFSALDR   | TTKHHIATRLLGPEGLLR |              |          |       |
| 26_8391  | GRIGSGGARLSGGQKQRLALARAIA | TRKDIVLLDDVFSALDR   | TTKHHIATRLLGPEGLLR |              |          |       |
| 27_8170  | GRIGSGGARLSGGQKQRLALART   | IATRKDIVLLDDVFSALDR | TTKHHIATRLLGPEGLLR |              |          |       |
| 28_5209  | GRIGSGGARLSGGQKQRLALARAIA | TRKDIVLLDDVFSALDR   | TTKHHIATRLLGPEGLLR |              |          |       |
| 29_2181  | GRIGSGGARLSGGQKQRLALART   | IATRKDIVLLDDVFSALDR | TTKHHIATRLLGPEGLLR |              |          |       |
| 30_8564  | GRIGSGGARLSGGQKQRLALARAIA | TRKDIVLLDDVFSALDR   | TTKHHIATRLLGPEGLLR |              |          |       |
| 31_1582  | GRIGSGGARLSGGQKQRLALARAIA | TRKDIVLLDDVFSALDR   | TTKHHIATRLLGPEGLLR |              |          |       |
| 32_4537  | GRIGSGGARLSGGQKQRLALARAIA | TRKDIVLLDDVFSALDR   | TTKHHIATRLLGPEGLLR |              |          |       |
| 33_9418  | GRIGSGGARLSGGQKQRLALARAIA | TRKDIVLLDDVFSALDR   | TTKHHIATRLLGPEGLLR |              |          |       |
| 34_1782  | GRIGSGGARLSGGQKQRLALARAIA | TRKDIVLLDDVFSALDR   | TTKHHIATRLLGPEGLLR |              |          |       |
| 35_10360 | GRIGSGGARLSGGQKQRLALARAIA | TRKDIVLLDDVFSALDR   | TTKHHIATRLLGPEGLLR |              |          |       |
| 36_468   | GRIGSGGARLSGGQKQRLALARAIA | TRKDIVLLDDVFSALDR   | TTKHHIATRLLGPEGLLR |              |          |       |
| 37_4956  | GRIGSGGARLSGGQKQRLALARAIA | TRKDIVLLDDVFSALDR   | TTKHHIATRLLGPEGLLR |              |          |       |
| 38_4305  | GRIGSGGARLSGGQKQRLALARAIA | TRKDIVLLDDVFSALDR   | TTKHHIATRLLGPEGLLR |              |          |       |
| 39_4737  | GRIGSGGARLSGGQKQRLALARAIA | TRKDIVLLDDVFSALDR   | TTKHHIATRLLGPEGLLR |              |          |       |
| 40_9543  | GRIGSGGARLSGGQKQRLALARAIA | TRKDIVLLDDVFSALDR   | TTKHHIATRLLGPEGLLR |              |          |       |
| 41_6669  | GRIGSGGARLSGGQKQRLALARAIA | TRKDIVLLDDVFSALDR   | TTKHHIATRLLGPEGLLR |              |          |       |
| 42_10558 | GRIGSGGARLSGGQKQRLALARAIA | TRKDIVLLDDVFSALDR   | TTKHHIATRLLGPEGLLR |              |          |       |
| 43_8051  | GRIGSGGARLSGGQKQRLALARAIA | TRKDIVLLDDVFSALDR   | TTKHHIATRLLGPEGLLR |              |          |       |
| 44_10454 | GRIGSGGARLSGGQKQRLALARAIA | TRKDIVLLDDVFSALDR   | TTKHHIATRLLGPEGLLR |              |          |       |
| 45_10126 | GRIGSGGARLSGGQKQRLALARAIA | TRKDIVLLDDVFSALDR   | TTKHHIATRLLGPEGLLR |              |          |       |
| 46_1547  | GRIGSGGARLSGGQKQRLALARAIA | TRKDIVLLDDVFSALDR   | TTKHHIATRLLGPEGLLR |              |          |       |
| 47_6749  | GRIGSGGARLSGGQKQRLALARAIA | TRKDIVLLDDVFSALDR   | TTKHHIATRLLGPEGLLR |              |          |       |
| 48_9982  | GRIGSGGARLSGGQKQRLALARAIA | TRKDIVLLDDVFSALDR   | TTKHHIATRLLGPEGLLR |              |          |       |
| 49_7293  | GRIGSGGARLSGGQKQRLALARAIA | TRKDIVLLDDVFSALDR   | TTKHHIATRLLGPEGLLR |              |          |       |
| 50_5993  | GRIGSGGARLSGGQKQRLALARAIA | TRKDIVLLDDVFSALDR   | TTKHHIATRLLGPEGLLR |              |          |       |
| 51_4791  | GRIGSGGARLSGGQKQRLALARAIA | TRKDIVLLDDVFSALDR   | TTKHHIATRLLGPEGLLR |              |          |       |
| 52_121   | GRIGSGGARLSGGQKQRLALARAIA | TRKDIVLLDDVFSALDR   | TTKHHIATRLLGPEGLLR |              |          |       |
| 53_1667  | GRIGSGGARLSGGQKQRLALARAIA | TRKDIVLLDDVFSALDR   | TTKHHIATRLLGPEGLLR |              |          |       |
| 54_10488 | GRIGSGGARLSGGQKQRLALARAIA | TRKDIVLLDDVFSALDR   | TTKHHIATRLLGPEGLLR |              |          |       |
| 55_7733  | GRIGSGGARLSGGQKQRLALARAIA | TRKDIVLLDDVFSALDR   | TTKHHIATRLLGPEGLLR |              |          |       |
| 56_3982  | GRIGSGGARLSGGQKQRLALARAIA | TRKDIVLLDDVFSALDR   | TTKHHIATRLLGPEGLLR |              |          |       |
| 57_392   | GRIGSGGARLSGGQKQRLALARAIA | TRKDIVLLDDVFSALDR   | TTKHHIATRLLGPEGLLR |              |          |       |
| 58_10291 | GRIGSGGARLSGGQKQRLALARAIA | TRKDIVLLDDVFSALDR   | TTKHHIATRLLGPEGLLR |              |          |       |
| 59_5792  | GRIGSGGARLSGGQKQRLALARAIA | TRKDIVLLDDVFSALDR   | TTKHHIATRLLGPEGLLR |              |          |       |
| 60_8712  | GRIGSGGARLSGGQKQRLALARAIA | TRKDIVLLDDVFSALDR   | TTKHHIATRLLGPEGLLR |              |          |       |
| 61_6716  | GRIGSGGARLSGGQKQRLALARAIA | TRKDIVLLDDVFSALDR   | TTKHHIATRLLGPEGLLR |              |          |       |
| 62_5599  | GRIGSGGARLSGGQKQRLALARAIA | TRKDIVLLDDVFSALDR   | TTKHHIATRLLGPEGLLR |              |          |       |
| 63_304   | GRIGSGGARLSGGQKQRLALARAIA | TRKDIVLLDDVFSALDR   | TTKHHIATRLLGPEGLLR |              |          |       |
| 64_10473 | .....                     |                     |                    |              |          |       |
| 65_6310  | GRIGSGGARLSGGQKQRLALARAIA | TRKDIVLLDDVFSALDR   | TTKHHIATRLLGPEGLLR |              |          |       |
| 66_8714  | GRIGSGGARLSGGQKQRLALARAIA | TRKDIVLLDDVFSALDR   | TTKHHIATRLLGPEGLLR |              |          |       |
| 67_2350  | GRIGSGGARLSGGQKQRLALARAIA | TRKDIVLLDDVFSALDR   | TTKHHIATRLLGPEGLLR |              |          |       |
| 68_2447  | GRIGSGGARLSGGQKQRLALARAIA | TRKDIVLLDDVFSALDR   | TTKHHIATRLLGPEGLLR |              |          |       |
| 69_5658  | GRIGSGGARLSGGQKQRLALARAIA | TRKDIVLLDDVFSALDR   | TTKHHIATRLLGPEGLLR |              |          |       |
| 70_1277  | GRIGSGGARLSGGQKQRLALARAIA | TRKDIVLLDDVFSALDR   | TTKHHIATRLLGPEGLLR |              |          |       |
| 71_3717  | GRIGSGGARLSGGQKQRLALARAIA | TRKDIVLLDDVFSALDR   | TTKHHIATRLLGPEGLLR |              |          |       |
| 72_7846  | GRIGSGGARLSGGQKQRLALARAIA | TRKDIVLLDDVFSALDR   | TTKHHIATRLLGPEGLLR |              |          |       |
| 73_10528 | GRIGSGGARLSGGQKQRLALARAIA | TRKDIVLLDDVFSALDR   | TTKHHIATRLLGPEGLLR |              |          |       |
| 74_4899  | GRIGSGGARLSGGQKQRLALARAIA | TRKDIVLLDDVFSALDR   | TTKHHIATRLLGPEGLLR |              |          |       |
| 75_5507  | GRIGSGGARLSGGQKQRLALARAIA | TRKDIVLLDDVFSALDR   | TTKHHIATRLLGPEGLLR |              |          |       |
| 76_5432  | GRIGSGGARLSGGQKQRLALARAIA | TRKDIVLLDDVFSALDR   | TTKHHIATRLLGPEGLLR |              |          |       |
| 77_10770 | GRIGSGGARLSGGQKQRLALARAIA | TRKDIVLLDDVFSALDR   | TTKHHIATRLLGPEGLLR |              |          |       |
| 78_5904  | GRIGSGGARLSGGQKQRLALARAIA | TRKDIVLLDDVFSALDR   | TTKHHIATRLLGPEGLLR |              |          |       |
| 79_9653  | GRIGSGGARLSGGQKQRLALARAIA | TRKDIVLLDDVFSALDR   | TTKHHIATRLLGPEGLLR |              |          |       |
| 80_4462  | GRIGSGGARLSGGQKQRLALARAIA | TRKDIVLLDDVFSALDR   | TTKHHIATRLLGPEGLLR |              |          |       |
| 81_7194  | GRIGSGGARLSGGQKQRLPHG     | FSGPRGFC            | EGWERQYYLQLTTVT    | NLADQVYEITVD | GILT     |       |
| 82_1022  | GRIGSGGARLSGGQKQRLALARAIA | TRKDIVLLDDVFSALDR   | TTKHHIATRLLGPEGLLR |              |          |       |
| 83_9813  | GRIGSGGARLSGGQKQRLALARAIA | TRKDIVLLDDVFSALDR   | TTKHHIATRLLGPEGLLR |              |          |       |
| 84_1902  | GRIGSGGARLSGGQKQRLALARAIA | TRKDIVLLDDVFSALDR   | TTKHHIATRLLGPEGLLR |              |          |       |
| 85_5152  | GRIGSGGARLSGGQKQRLALARAIA | TRKDIVLLDDVFSALDR   | TTKHHIATRLLGPEGLLR |              |          |       |
| 86_3385  | GRIGSGGARLSGGQKQRLALARAIA | TRKDIVLLDDVFSALDR   | TTKHHIATRLLGPEGLLR |              |          |       |
| 87_10760 | GRIGSGGARLSGGQKQRLALARAIA | TRKDIVLLDDVFSALDR   | TTKHHIATRLLGPEGLLR |              |          |       |
| 88_1588  | GRIGSGGARLSGGQKQRLALARAIA | TRKDIVLLDDVFSALDR   | TTKHHIATRLLGPEGLLR |              |          |       |
| 89_1609  | GRIGSGGARLSGGQKQRLALARAIA | TRKDIVLLDDVFSALDR   | TTKHHIATRLLGPEGLLR |              |          |       |
| 90_4023  | GRIGSGGARLSGGQKQRLALARAIA | TRKDIVLLDDVFSALDR   | TTKHHIATRLLGPEGLLR |              |          |       |

|          | 790                                          | 800          | 810    | 820  | 830      | 840           |
|----------|----------------------------------------------|--------------|--------|------|----------|---------------|
| 1_4160   | RLGTTVLFATHDSSIANLADQVYEITVDGILTPVLVQKPADDEG | TKHEDSDAKY   | TVTDAS |      |          |               |
| 2_6143   | RLGTTVLFATHDSSIANLADQVYEITVDGILTPVLVQKPADDEG | TKHEDSDAKY   | TVTDAS |      |          |               |
| 3_6554   | RLGTTVLFATHDSSIANLADQVYEITVDGILTPVLVQKPADDEG | TKHEDSDAKY   | TVTDAS |      |          |               |
| 4_111    | RLGTTVLFATHDSSIANLADQVYEITVDGILTPVLVQKPADDEG | TKHEDSDAKY   | TVTDAS |      |          |               |
| 5_5742   | RLGTTVLFATHDSSIANLADQVYEITVDGILTPVLVQKPADDEG | TKHEDSDAKY   | TVTDAS |      |          |               |
| 6_9490   | RLGTTVLFATHDSSIANLADQVYEITVDGILTPVLVQKPADDEG | TKHEDSDAKY   | TVTDAS |      |          |               |
| 7_6313   | GDISDQVMEEMLRRCRVWEVVENSGGLGAKRADSKLSAGETQLL | IATARLLLQWSQ | PAGS   |      |          |               |
| 8_2552   | RLGTTVLFATHDSSIANLADQVYEITVDGILTPVLVQKPADDEG | TKHEDSDAKY   | TVTDAS |      |          |               |
| 9_7745   | RLGTTVLFATHDSSIANLADQVYEITVDGILTPVLVQKPADDEG | TKHEDSDAKY   | TVTDAS |      |          |               |
| 10_2315  | RLGTTVLFATHDSSIANLADQVYEITVDGILTPVLVQKPADDEG | TKHEDSDAKY   | TVTDAS |      |          |               |
| 11_2035  | RLGTTVLFATHDSSIANLADQVYEITVDGILTPVLVQKPADDEG | TKHEDSDAKY   | TVTDAS |      |          |               |
| 12_9640  | RLGTTVLFATHDSSIANLADQVYEITVDGILTPVLVQKPADDEG | TKHEDSDAKY   | TVTDAS |      |          |               |
| 13_3674  | RLGTTVLFATHDSSIANLADQVYEITVDGILTPVLVQKPADDEG | TKHEDSDAKY   | TVTDAS |      |          |               |
| 14_6548  | RLGTTVLFATHDSSIANLADQVYEITVDGILTPVLVQKPADDEG | TKHEDSDAKY   | TVTDAS |      |          |               |
| 15_10828 | RLGTTVLFATHDSSIANLADQVYEITVDGILTPVLVQKPADDEG | TKHEDSDAKY   | TVTDAS |      |          |               |
| 16_6578  | RLGTTVLFATHDSSIANLADQVYEITVDGILTPVLVQKPADDEG | TKHEDSDAKY   | TVTDAS |      |          |               |
| 17_10233 | RLGTTVLFATHDSSIANLADQVYEITVDGILTPVLVQKPADDEG | TKHEDSDAKY   | TVTDAS |      |          |               |
| 18_9261  | RLGTTVLFATHDSSIANLADQVYEITVDGILTPVLVQKPADDEG | TKHEDSDAKY   | TVTDAS |      |          |               |
| 19_8450  | RLGTTVLFATHDSSIANLADQVYEITVDGILTPVLVQKPADDEG | TKHEDSDAKY   | TVTDAS |      |          |               |
| 20_1727  | RLGTTVLFATHDSSIANLADQVYEITVDGILTPVLVQKPADDEG | TKHEDSDAKY   | TVTDAS |      |          |               |
| 21_206   | RLGTTVLFATHDSSIANLADQVYEITVDGILTPVLVQKPADDEG | TKHEDSDAKY   | TVTDAS |      |          |               |
| 22_7439  | RLGTTVLFATHDSSIANLADQVYEITVDGILTPVLVQKPADDEG | TKHEDSDAKY   | TVTDAS |      |          |               |
| 23_3780  | RLGTTVLFATHDSSIANLADQVYEITVDGILTPVLVQKPADDEG | TKHEDSDAKY   | TVTDAS |      |          |               |
| 24_967   | RLGTTVLFATHDSSIANLADQVYEITVDGILTPVLVQKPADDEG | TKHEDSDAKY   | TVTDAS |      |          |               |
| 25_6595  | RLGTTVLFATHDSSIANLADQVYEITVDGILTPVLVQKPADDEG | TKHEDSDAKY   | TVTDAS |      |          |               |
| 26_8391  | RLGTTVLFATHDSSIANLADQVYEITVDGILTPVLVQKPADDEG | TKHEDSDAKY   | TVTDAS |      |          |               |
| 27_8170  | RLGTTVLFATHDSSIANLADQVYEITVDGILTPVLVQKPADDEG | TKHEDSDAKY   | TVTDAS |      |          |               |
| 28_5209  | RLGTTVLFATHDSSIANLADQVYEITVDGILTPVLVQKPADDEG | TKHEDSDAKY   | TVTDAS |      |          |               |
| 29_2181  | RLGTTVLFATHDSSIANLADQVYEITVDGILTPVLVQKPADDEG | TKHEDSDAKY   | TVTDAS |      |          |               |
| 30_8564  | RLGTTVLFATHDSSIANLADQVYEITVDGILTPVLVQKPADDEG | TKHEDSDAKY   | TVTDAS |      |          |               |
| 31_1582  | RLGTTVLFATHDSSIANLADQVYEITVDGILTPVLVQKPADDEG | TKHEDSDAKY   | TVTDAS |      |          |               |
| 32_4537  | RLGTTVLFATHDSSIANLADQVYEITVDGILTPVLVQKPADDEG | TKHEDSDAKY   | TVTDAS |      |          |               |
| 33_9418  | RLGTTVLFATHDSSIANLADQVYEITVDGILTPVLVQKPADDEG | TKHEDSDAKY   | TVTDAS |      |          |               |
| 34_1782  | RLGTTVLFATHDSSIANLADQVYEITVDGILTPVLVQKPADDEG | TKHEDSDAKY   | TVTDAS |      |          |               |
| 35_10360 | RLGTTVLFATHDSSIANLADQVYEITVDGILTPVLVQKPADDEG | TKHEDSDAKY   | TVTDAS |      |          |               |
| 36_468   | RLGTTVLFATHDSSIANLADQVYEITVDGILTPVLVQKPADDEG | TKHEDSDAKY   | TVTDAS |      |          |               |
| 37_4956  | RLGTTVLFATHDSSIANLADQVYEITVDGILTPVLVQKPADDEG | TKHEDSDAKY   | TVTDAS |      |          |               |
| 38_4305  | RLGTTVLFATHDSSIANLADQVYEITVDGILTPVLVQKPADDEG | TKHEDSDAKY   | TVTDAS |      |          |               |
| 39_4737  | RLGTTVLFATHDSSIANLADQVYEITVDGILTPVLVQKPADDEG | TKHEDSDAKY   | TVTDAS |      |          |               |
| 40_9543  | RLGTTVLFATHDSSIANLADQVYEITVDGILTPVLVQKPADDEG | TKHEDSDAKY   | TVTDAS |      |          |               |
| 41_6669  | RLGTTVLFATHDSSIANLADQVYEITVDGILTPVLVQKPADDEG | TKHEDSDAKY   | TVTDAS |      |          |               |
| 42_10558 | RLGTTVLFATHDSSIANLADQVYEITVDGILTPVLVQKPADDEG | TKHEDSDAKY   | TVTDAS |      |          |               |
| 43_8051  | RLGTTVLFATHDSSIANLADQVYEITVDGILTPVLVQKPADDEG | TKHEDSDAKY   | TVTDAS |      |          |               |
| 44_10454 | RLGTTVLFATHDSSIANLADQVYEITVDGILTPVLVQKPADDEG | TKHEDSDAKY   | TVTDAS |      |          |               |
| 45_10126 | RLGTTVLFATHDSSIANLADQVYEITVDGILTPVLVQKPADDEG | TKHEDSDAKY   | TVTDAS |      |          |               |
| 46_1547  | RLGTTVLFATHDSSIANLADQVYEITVDGILTPVLVQKPADDEG | TKHEDSDAKY   | TVTDAS |      |          |               |
| 47_6749  | RLGTTVLFATHDSSIANLADQVYEITVDGILTPVLVQKPADDEG | TKHEDSDAKY   | TVTDAS |      |          |               |
| 48_9982  | RLGTTVLFATHDSSIANLADQVYEITVDGILTPVLVQKPADDEG | TKHEDSDAKY   | TVTDAS |      |          |               |
| 49_7293  | RLGTTVLFATHDSSIANLADQVYEITVDGILTPVLVQKPADDEG | TKHEDSDAKY   | TVTDAS |      |          |               |
| 50_5993  | RLGTTVLFATHDSSIANLADQVYEITVDGILTPVLVQKPADDEG | TKHEDSDAKY   | TVTDAS |      |          |               |
| 51_4791  | RLGTTVLFATHDSSIANLADQVYEITVDGILTPVLVQKPADDEG | TKHEDSDAKY   | TVTDAS |      |          |               |
| 52_121   | RLGTTVLFATHDSSIANLADQVYEITVDGILTPVLVQKPADDEG | TKHEDSDAKY   | TVTDAS |      |          |               |
| 53_1667  | RLGTTVLFATHDSSIANLADQVYEITVDGILTPVLVQKPADDEG | TKHEDSDAKY   | TVTDAS |      |          |               |
| 54_10488 | RLGTTVLFATHDSSIANLADQVYEITVDGILTPVLVQKPADDEG | TKHEDSDAKY   | TVTDAS |      |          |               |
| 55_7733  | RLGTTVLFATHDSSIANLADQVYEITVDGILTPVLVQKPADDEG | TKHEDSDAKY   | TVTDAS |      |          |               |
| 56_3982  | RLGTTVLFATHDSSIANLADQVYEITVDGILTPVLVQKPADDEG | TKHEDSDAKY   | TVTDAS |      |          |               |
| 57_392   | RLGTTVLFATHDSSIANLADQVYEITVDGILTPVLVQKPADDEG | TKHEDSDAKY   | TVTDAS |      |          |               |
| 58_10291 | RLGTTVLFATHDSSIANLADQVYEITVDGILTPVLVQKPADDEG | TKHEDSDAKY   | TVTDAS |      |          |               |
| 59_5792  | RLGTTVLFATHDSSIANLADQVYEITVDGILTPVLVQKPADDEG | TKHEDSDAKY   | TVTDAS |      |          |               |
| 60_8712  | RLGTTVLFATHDSSIANLADQVYEITVDGILTPVLVQKPADDEG | TKHEDSDAKY   | TVTDAS |      |          |               |
| 61_6716  | RLGTTVLFATHDSSIANLADQVYEITVDGILTPVLVQKPADDEG | TKHEDSDAKY   | TVTDAS |      |          |               |
| 62_5599  | RLGTTVLFATHDSSIANLADQVYEITVDGILTPVLVQKPADDEG | TKHEDSDAKY   | TVTDAS |      |          |               |
| 63_304   | RLGTTVLFATHDSSIANLADQVYEITVDGILTPVLVQKPADDEG | TKHEDSDAKY   | TVTDAS |      |          |               |
| 64_10473 | .....                                        |              |        |      |          |               |
| 65_6310  | RLGTTVLFATHDSSIANLADQVYEITVDGILTPVLVQKPADDEG | TKHEDSDAKY   | TVTDAS |      |          |               |
| 66_8714  | RLGTTVLFATHDSSIANLADQVYEITVDGILTPVLVQKPADDEG | TKHEDSDAKY   | TVTDAS |      |          |               |
| 67_2350  | RLGTTVLFATHDSSIANLADQVYEITVDGILTPVLVQKPADDEG | TKHEDSDAKY   | TVTDAS |      |          |               |
| 68_2447  | RLGTTVLFATHDSSIANLADQVYEITVDGILTPVLVQKPADDEG | TKHEDSDAKY   | TVTDAS |      |          |               |
| 69_5658  | RLGTTVLFATHDSSIANLADQVYEITVDGILTPVLVQKPADDEG | TKHEDSDAKY   | TVTDAS |      |          |               |
| 70_1277  | RLGTTVLFATHDSSIANLADQVYEITVDGILTPVLVQKPADDEG | TKHEDSDAKY   | TVTDAS |      |          |               |
| 71_3717  | RLGTTVLFATHDSSIANLADQVYEITVDGILTPVLVQKPADDEG | TKHEDSDAKY   | TVTDAS |      |          |               |
| 72_7846  | RLGTTVLFATHDSSIANLADQVYEITVDGILTPVLVQKPADDEG | TKHEDSDAKY   | TVTDAS |      |          |               |
| 73_10528 | RLGTTVLFATHDSSIANLADQVYEITVDGILTPVLVQKPADDEG | TKHEDSDAKY   | TVTDAS |      |          |               |
| 74_4899  | RLGTTVLFATHDSSIANLADQVYEITVDGILTPVLVQKPADDEG | TKHEDSDAKY   | TVTDAS |      |          |               |
| 75_5507  | RLGTTVLFATHDSSIANLADQVYEITVDGILTPVLVQKPADDEG | TKHEDSDAKY   | TVTDAS |      |          |               |
| 76_5432  | RLGTTVLFATHDSSIANLADQVYEITVDGILTPVLVQKPADDEG | TKHEDSDAKY   | TVTDAS |      |          |               |
| 77_10770 | RLGTTVLFATHDSSIANLADQVYEITVDGILTPVLVQKPADDEG | TKHEDSDAKY   | TVTDAS |      |          |               |
| 78_5904  | RLGTTVLFATHDSSIANLADQVYEITVDGILTPVLVQKPADDEG | TKHEDSDAKY   | TVTDAS |      |          |               |
| 79_9653  | RLGTTVLFATHDSSIANLADQVYEITVDGILTPVLVQKPADDEG | TKHEDSDAKY   | TVTDAS |      |          |               |
| 80_4462  | RLGTTVLFATHDSSIANLADQVYEITVDGILTPVLVQKPADDEG | TKHEDSDAKY   | TVTDAS |      |          |               |
| 81_7194  | PVLVQKPADDEG                                 | TKHEDSDAKY   | TVTDAS | NDEK | ISTAPDHG | TNTVMTHKVENGG |
| 82_1022  | RLGTTVLFATHDSSIANLADQVYEITVDGILTPVLVQKPADDEG | TKHEDSDAKY   | TVTDAS |      |          |               |
| 83_9813  | RLGTTVLFATHDSSIANLADQVYEITVDGILTPVLVQKPADDEG | TKHEDSDAKY   | TVTDAS |      |          |               |
| 84_1902  | RLGTTVLFATHDSSIANLADQVYEITVDGILTPVLVQKPADDEG | TKHEDSDAKY   | TVTDAS |      |          |               |
| 85_5152  | RLGTTVLFATHDSSIANLADQVYEITVDGILTPVLVQKPADDEG | TKHEDSDAKY   | TVTDAS |      |          |               |
| 86_3385  | RLGTTVLFATHDSSIANLADQVYEITVDGILTPVLVQKPADDEG | TKHEDSDAKY   | TVTDAS |      |          |               |
| 87_10760 | RLGTTVLFATHDSSIANLADQVYEITVDGILTPVLVQKPADDEG | TKHEDSDAKY   | TVTDAS |      |          |               |
| 88_1588  | RLGTTVLFATHDSSIANLADQVYEITVDGILTPVLVQKPADDEG | TKHEDSDAKY   | TVTDAS |      |          |               |
| 89_1609  | RLGTTVLFATHDSSIANLADQVYEITVDGILTPVLVQKPADDEG | TKHEDSDAKY   | TVTDAS |      |          |               |
| 90_4023  | RLGTTVLFATHDSSIANLADQVYEITVDGILTPVLVQKPADDEG | TKHEDSDAKY   | TVTDAS |      |          |               |

|          | 850     | 860     | 870     | 880     | 890      | 900                               |
|----------|---------|---------|---------|---------|----------|-----------------------------------|
| 1_4160   | NDEKT   | STAPDHG | TNTVM   | THKVEN  | GGEATG   | TSVSDKKVYLRYARAMGFKNAATFLFLVMGC   |
| 2_6143   | NDEKT   | STAPDHG | TNTVM   | THKVEN  | GGEATG   | TSVSDKKVYLRYARAMGFKNAATFLFLVMGC   |
| 3_6554   | NDEKT   | STAPDHG | TNTVM   | THKVEN  | GGEATG   | TSVSDKKVYLRYARAMGFKNAATFLFLVMGC   |
| 4_111    | NDEKT   | STAPDHG | TNTVM   | THKVEN  | GGEATG   | TSVSDKKVYLRYARAMGFKNAATFLFLVMGC   |
| 5_5742   | NDEKT   | STAPDHG | TNTVM   | THKVEN  | GGEATG   | TSVSDKKVYLRYARAMGFKNAATFLFLVMGC   |
| 6_9490   | NDEKT   | STAPDHG | TNTVM   | THKVEN  | GGEATG   | TSVSDKKVYLRYARAMGFKNAATFLFLVMGC   |
| 7_6313   | GGIILL  | DEATS   | NLDRQ   | TEVHLE  | SVMAARI  | QHATVVSVMHRLEAVAAVDKVAIILDKGVLVLD |
| 8_2552   | NDEKT   | STAPDHG | TNTVM   | THKVEN  | GGEATG   | TSVSDKKVYLRYARAMGFKNAATFLFLVMGC   |
| 9_7745   | NDEKT   | STAPDHG | TNTVM   | THKVEN  | GGEATG   | TSVSDKKVYLRYARAMGFKNAATFLFLVMGC   |
| 10_2315  | NDEKT   | STAPDHG | TNTVM   | THKVEN  | GGEATG   | TSVSDKKVYLRYARAMGFKNAATFLFLVMGC   |
| 11_2035  | NDEKT   | STAPDHG | TNTVM   | THKVEN  | GGEATG   | TSVSDKKVYLRYARAMGFKNAATFLFLVMGC   |
| 12_9640  | NDEKT   | STAPDHG | TNTVM   | THKVEN  | GGEATG   | TSVSDKKVYLRYARAMGFKNAATFLFLVMGC   |
| 13_3674  | NDEKT   | STAPDHG | TNTVM   | THKVEN  | GGEATG   | TSVSDKKVYLRYARAMGFKNAATFLFLVMGC   |
| 14_6548  | NDEKT   | STAPDHG | TNTVM   | THKVEN  | GGEATG   | TSVSDKKVYLRYARAMGFKNAATFLFLVMGC   |
| 15_10828 | NDEKT   | STAPDHG | TNTVM   | THKVEN  | GGEATG   | TSVSDKKVYLRYARAMGFKNAATFLFLVMGC   |
| 16_6578  | NDEKT   | STAPDHG | TNTVM   | THKVEN  | GGEATG   | TSVSDKKVYLRYARAMGFKNAATFLFLVMGC   |
| 17_10233 | NDEKT   | STAPDHG | TNTVM   | THKVEN  | GGEATG   | TSVSDKKVYLRYARAMGFKNAATFLFLVMGC   |
| 18_9261  | NDEKT   | STAPDHG | TNTVM   | THKVEN  | GGEATG   | TSVSDKKVYLRYARAMGFKNAATFLFLVMGC   |
| 19_8450  | NDEKT   | STAPDHG | TNTVM   | THKVEN  | GGEATG   | TSVSDKKVYLRYARAMGFKNAATFLFLVMGC   |
| 20_1727  | NDEKT   | STAPDHG | TNTVM   | THKVEN  | GGEATG   | TSVSDKKVYLRYARAMGFKNAATFLFLVMGC   |
| 21_206   | NDEKT   | STAPDHG | TNTVM   | THKVEN  | GGEATG   | TSVSDKKVYLRYARAMGFKNAATFLFLVMGC   |
| 22_7439  | NDEKT   | STAPDHG | TNTVM   | THKVEN  | GGEATG   | TSVSDKKVYLRYARAMGFKNAATFLFLVMGC   |
| 23_3780  | NDEKT   | STAPDHG | TNTVM   | THKVEN  | GGEATG   | TSVSDKKVYLRYARAMGFKNAATFLFLVMGC   |
| 24_967   | NDEKT   | STAPDHG | TNTVM   | THKVEN  | GGEATG   | TSVSDKKVYLRYARAMGFKNAATFLFLVMGC   |
| 25_6595  | NDEKT   | STAPDHG | TNTVM   | THKVEN  | GGEATG   | TSVSDKKVYLRYARAMGFKNAATFLFLVMGC   |
| 26_8391  | NDEKT   | STAPDHG | TNTVM   | THKVEN  | GGEATG   | TSVSDKKVYLRYARAMGFKNAATFLFLVMGC   |
| 27_8170  | NDEKT   | STAPDHG | TNTVM   | THKVEN  | GGEATG   | TSVSDKKVYLRYARAMGFKNAATFLFLVMGC   |
| 28_5209  | NDEKT   | STAPDHG | TNTVM   | THKVEN  | GGEATG   | TSVSDKKVYLRYARAMGFKNAATFLFLVMGC   |
| 29_2181  | NDEKT   | STAPDHG | TNTVM   | THKVEN  | GGEATG   | TSVSDKKVYLRYARAMGFKNAATFLFLVMGC   |
| 30_8564  | NDEKT   | STAPDHG | TNTVM   | THKVEN  | GGEATG   | TSVSDKKVYLRYARAMGFKNAATFLFLVMGC   |
| 31_1582  | NDEKT   | STAPDHG | TNTVM   | THKVEN  | GGEATG   | TSVSDKKVYLRYARAMGFKNAATFLFLVMGC   |
| 32_4537  | NDEKT   | STAPDHG | TNTVM   | THKVEN  | GGEATG   | TSVSDKKVYLRYARAMGFKNAATFLFLVMGC   |
| 33_9418  | NDEKT   | STAPDHG | TNTVM   | THKVEN  | GGEATG   | TSVSDKKVYLRYARAMGFKNAATFLFLVMGC   |
| 34_1782  | NDEKT   | STAPDHG | TNTVM   | THKVEN  | GGEATG   | TSVSDKKVYLRYARAMGFKNAATFLFLVMGC   |
| 35_10360 | NDEKT   | STAPDHG | TNTVM   | THKVEN  | GGEATG   | TSVSDKKVYLRYARAMGFKNAATFLFLVMGC   |
| 36_468   | NDEKT   | STAPDHG | TNTVM   | THKVEN  | GGEATG   | TSVSDKKVYLRYARAMGFKNAATFLFLVMGC   |
| 37_4956  | NDEKT   | STAPDHG | TNTVM   | THKVEN  | GGEATG   | TSVSDKKVYLRYARAMGFKNAATFLFLVMGC   |
| 38_4305  | NDEKT   | STAPDHG | TNTVM   | THKVEN  | GGEATG   | TSVSDKKVYLRYARAMGFKNAATFLFLVMGC   |
| 39_4737  | NDEKT   | STAPDHG | TNTVM   | THKVEN  | GGEATG   | TSVSDKKVYLRYARAMGFKNAATFLFLVMGC   |
| 40_9543  | NDEKT   | STAPDHG | TNTVM   | THKVEN  | GGEATG   | TSVSDKKVYLRYARAMGFKNAATFLFLVMGC   |
| 41_6669  | NDEKT   | STAPDHG | TNTVM   | THKVEN  | GGEATG   | TSVSDKKVYLRYARAMGFKNAATFLFLVMGC   |
| 42_10558 | NDEKT   | STAPDHG | TNTVM   | THKVEN  | GGEATG   | TSVSDKKVYLRYARAMGFKNAATFLFLVMGC   |
| 43_8051  | NDEKT   | STAPDHG | TNTVM   | THKVEN  | GGEATG   | TSVSDKKVYLRYARAMGFKNAATFLFLVMGC   |
| 44_10454 | NDEKT   | STAPDHG | TNTVM   | THKVEN  | GGEATG   | TSVSDKKVYLRYARAMGFKNAATFLFLVMGC   |
| 45_10126 | NDEKT   | STAPDHG | TNTVM   | THKVEN  | GGEATG   | TSVSDKKVYLRYARAMGFKNAATFLFLVMGC   |
| 46_1547  | NDEKT   | STAPDHG | TNTVM   | THKVEN  | GGEATG   | TSVSDKKVYLRYARAMGFKNAATFLFLVMGC   |
| 47_6749  | NDEKT   | STAPDHG | TNTVM   | THKVEN  | GGEATG   | TSVSDKKVYLRYARAMGFKNAATFLFLVMGC   |
| 48_9982  | NDEKT   | STAPDHG | TNTVM   | THKVEN  | GGEATG   | TSVSDKKVYLRYARAMGFKNAATFLFLVMGC   |
| 49_7293  | NDEKT   | STAPDHG | TNTVM   | THKVEN  | GGEATG   | TSVSDKKVYLRYARAMGFKNAATFLFLVMGC   |
| 50_5993  | NDEKT   | STAPDHG | TNTVM   | THKVEN  | GGEATG   | TSVSDKKVYLRYARAMGFKNAATFLFLVMGC   |
| 51_4791  | NDEKT   | STAPDHG | TNTVM   | THKVEN  | GGEATG   | TSVSDKKVYLRYARAMGFKNAATFLFLVMGC   |
| 52_121   | NDEKT   | STAPDHG | TNTVM   | THKVEN  | GGEATG   | TSVSDKKVYLRYARAMGFKNAATFLFLVMGC   |
| 53_1667  | NDEKT   | STAPDHG | TNTVM   | THKVEN  | GGEATG   | TSVSDKKVYLRYARAMGFKNAATFLFLVMGC   |
| 54_10488 | NDEKT   | STAPDHG | TNTVM   | THKVEN  | GGEATG   | TSVSDKKVYLRYARAMGFKNAATFLFLVMGC   |
| 55_7733  | NDEKT   | STAPDHG | TNTVM   | THKVEN  | GGEATG   | TSVSDKKVYLRYARAMGFKNAATFLFLVMGC   |
| 56_3982  | NDEKT   | STAPDHG | TNTVM   | THKVEN  | GGEATG   | TSVSDKKVYLRYARAMGFKNAATFLFLVMGC   |
| 57_392   | NDEKT   | STAPDHG | TNTVM   | THKVEN  | GGEATG   | TSVSDKKVYLRYARAMGFKNAATFLFLVMGC   |
| 58_10291 | NDEKT   | STAPDHG | TNTVM   | THKVEN  | GGEATG   | TSVSDKKVYLRYARAMGFKNAATFLFLVMGC   |
| 59_5792  | NDEKT   | STAPDHG | TNTVM   | THKVEN  | GGEATG   | TSVSDKKVYLRYARAMGFKNAATFLFLVMGC   |
| 60_8712  | NDEKT   | STAPDHG | TNTVM   | THKVEN  | GGEATG   | TSVSDKKVYLRYARAMGFKNAATFLFLVMGC   |
| 61_6716  | NDEKT   | STAPDHG | TNTVM   | THKVEN  | GGEATG   | TSVSDKKVYLRYARAMGFKNAATFLFLVMGC   |
| 62_5599  | NDEKT   | STAPDHG | TNTVM   | THKVEN  | GGEATG   | TSVSDKKVYLRYARAMGFKNAATFLFLVMGC   |
| 63_304   | NDEKT   | STAPDHG | TNTVM   | THKVEN  | GGEATG   | TSVSDKKVYLRYARAMGFKNAATFLFLVMGC   |
| 64_10473 | .....   | .....   | .....   | .....   | .....    | .....                             |
| 65_6310  | NDEKT   | STAPDHG | TNTVM   | THKVEN  | GGEATG   | TSVSDKKVYLRYARAMGFKNAATFLFLVMGC   |
| 66_8714  | NDEKT   | STAPDHG | TNTVM   | THKVEN  | GGEATG   | TSVSDKKVYLRYARAMGFKNAATFLFLVMGC   |
| 67_2350  | NDEKT   | STAPDHG | TNTVM   | THKVEN  | GGEATG   | TSVSDKKVYLRYARAMGFKNAATFLFLVMGC   |
| 68_2447  | NDEKT   | STAPDHG | TNTVM   | THKVEN  | GGEATG   | TSVSDKKVYLRYARAMGFKNAATFLFLVMGC   |
| 69_5658  | NDEKT   | STAPDHG | TNTVM   | THKVEN  | GGEATG   | TSVSDKKVYLRYARAMGFKNAATFLFLVMGC   |
| 70_1277  | NDEKT   | STAPDHG | TNTVM   | THKVEN  | GGEATG   | TSVSDKKVYLRYARAMGFKNAATFLFLVMGC   |
| 71_3717  | NDEKT   | STAPDHG | TNTVM   | THKVEN  | GGEATG   | TSVSDKKVYLRYARAMGFKNAATFLFLVMGC   |
| 72_7846  | NDEKT   | STAPDHG | TNTVM   | THKVEN  | GGEATG   | TSVSDKKVYLRYARAMGFKNAATFLFLVMGC   |
| 73_10528 | NDEKT   | STAPDHG | TNTVM   | THKVEN  | GGEATG   | TSVSDKKVYLRYARAMGFKNAATFLFLVMGC   |
| 74_4899  | NDEKT   | STAPDHG | TNTVM   | THKVEN  | GGEATG   | TSVSDKKVYLRYARAMGFKNAATFLFLVMGC   |
| 75_5507  | NDEKT   | STAPDHG | TNTVM   | THKVEN  | GGEATG   | TSVSDKKVYLRYARAMGFKNAATFLFLVMGC   |
| 76_5432  | NDEKT   | STAPDHG | TNTVM   | THKVEN  | GGEATG   | TSVSDKKVYLRYARAMGFKNAATFLFLVMGC   |
| 77_10770 | NDEKT   | STAPDHG | TNTVM   | THKVEN  | GGEATG   | TSVSDKKVYLRYARAMGFKNAATFLFLVMGC   |
| 78_5904  | NDEKT   | STAPDHG | TNTVM   | THKVEN  | GGEATG   | TSVSDKKVYLRYARAMGFKNAATFLFLVMGC   |
| 79_9653  | NDEKT   | STAPDHG | TNTVM   | THKVEN  | GGEATG   | TSVSDKKVYLRYARAMGFKNAATFLFLVMGC   |
| 80_4462  | NDEKT   | STAPDHG | TNTVM   | THKVEN  | GGEATG   | TSVSDKKVYLRYARAMGFKNAATFLFLVMGC   |
| 81_7194  | SDKKVYL | RYARAMG | FKNAATF | FLFLVMG | CAVCFKIP | DLWQWSTAIKQGTITYSSSYWIGI          |
| 82_1022  | NDEKT   | STAPDHG | TNTVM   | THKVEN  | GGEATG   | TSVSDKKVYLRYARAMGFKNAATFLFLVMGC   |
| 83_9813  | NDEKT   | STAPDHG | TNTVM   | THKVEN  | GGEATG   | TSVSDKKVYLRYARAMGFKNAATFLFLVMGC   |
| 84_1902  | NDEKT   | STAPDHG | TNTVM   | THKVEN  | GGEATG   | TSVSDKKVYLRYARAMGFKNAATFLFLVMGC   |
| 85_5152  | NDEKT   | STAPDHG | TNTVM   | THKVEN  | GGEATG   | TSVSDKKVYLRYARAMGFKNAATFLFLVMGC   |
| 86_3385  | NDEKT   | STAPDHG | TNTVM   | THKVEN  | GGEATG   | TSVSDKKVYLRYARAMGFKNAATFLFLVMGC   |
| 87_10760 | NDEKT   | STAPDHG | TNTVM   | THKVEN  | GGEATG   | TSVSDKKVYLRYARAMGFKNAATFLFLVMGC   |
| 88_1588  | NDEKT   | STAPDHG | TNTVM   | THKVEN  | GGEATG   | TSVSDKKVYLRYARAMGFKNAATFLFLVMGC   |
| 89_1609  | NDEKT   | STAPDHG | TNTVM   | THKVEN  | GGEATG   | TSVSDKKVYLRYARAMGFKNAATFLFLVMGC   |
| 90_4023  | NDEKT   | STAPDHG | TNTVM   | THKVEN  | GGEATG   | TSVSDKKVYLRYARAMGFKNAATFLFLVMGC   |

|          | 910            | 920      | 930            | 940        | 950          | 960            |
|----------|----------------|----------|----------------|------------|--------------|----------------|
| 1_4160   | AVCFKIPDLWVQWW | STAIKQGT | TYSSSYW        | IGILALLEVL | PLLMLWLS     | SLFHVLFFIVPRSA |
| 2_6143   | AVCFKIPDLWVQWW | STAIKQGT | TYSSSYW        | IGILALLEVL | PLLMLWLS     | SLFHVLFFIVPRSA |
| 3_6554   | AVCFKIPDLWVQWW | STAIKQGT | TYSSSYW        | IGILALLEVL | PLLMLWLS     | SLFHVLFFIVPRSA |
| 4_111    | AVCFKIPDLWVQWW | STAIKQGT | TYSSSYW        | IGILALLEVL | PLLMLWLS     | SLFHVLFFIVPRSA |
| 5_5742   | AVCFKIPDLWVQWW | STAIKQGT | TYSSSYW        | IGILALLEVL | PLLMLWLS     | SLFHVLFFIVPRSA |
| 6_9490   | AVCFKIPDLWVQWW | STAIKQGT | TYSSSYW        | IGILALLEVL | PLLMLWLS     | SLFHVLFFIVPRSA |
| 7_6313   | FGPVADVMARCEL  | FGA..... |                |            |              |                |
| 8_2552   | AVCFKIPDLWVQWW | STAIKQGT | TYSSSYW        | IGILALLEVL | PLLMLWLS     | SLFHVLFFIVPRSA |
| 9_7745   | AVCFKIPDLWVQWW | STAIKQGT | TYSSSYW        | IGILALLEVL | PLLMLWLS     | SLFHVLFFIVPRSA |
| 10_2315  | AVCFKIPDLWVQWW | STAIKQGT | TYSSSYW        | IGILALLEVL | PLLMLWLS     | SLFHVLFFIVPRSA |
| 11_2035  | AVCFKIPDLWVQWW | STAIKQGT | TYSSSYW        | IGILALLEVL | PLLMLWLS     | SLFHVLFFIVPRSA |
| 12_9640  | AVCFKIPDLWVQWW | STAIKQGT | TYSSSYW        | IGILALLEVL | PLLMLWLS     | SLFHVLFFIVPRSA |
| 13_3674  | AVCFKIPDLWVQWW | STAIKQGT | TYSSSYW        | IGILALLEVL | PLLMLWLS     | SLFHVLFFIVPRSA |
| 14_6548  | AVCFKIPDLWVQWW | STAIKQGT | TYSSSYW        | IGILALLEVL | PLLMLWLS     | SLFHVLFFIVPRSA |
| 15_10828 | AVCFKIPDLWVQWW | STAIKQGT | TYSSSYW        | IGILALLEVL | PLLMLWLS     | SLFHVLFFIVPRSA |
| 16_6578  | AVCFKIPDLWVQWW | STAIKQGT | TYSSSYW        | IGILALLEVL | PLLMLWLS     | SLFHVLFFIVPRSA |
| 17_10233 | AVCFKIPDLWVQWW | STAIKQGT | TYSSSYW        | IGILALLEVL | PLLMLWLS     | SLFHVLFFIVPRSA |
| 18_9261  | AVCFKIPDLWVQWW | STAIKQGT | TYSSSYW        | IGILALLEVL | PLLMLWLS     | SLFHVLFFIVPRSA |
| 19_8450  | AVCFKIPDLWVQWW | STAIKQGT | TYSSSYW        | IGILALLEVL | PLLMLWLS     | SLFHVLFFIVPRSA |
| 20_1727  | AVCFKIPDLWVQWW | STAIKQGT | TYSSSYW        | IGILALLEVL | PLLMLWLS     | SLFHVLFFIVPRSA |
| 21_206   | AVCFKIPDLWVQWW | STAIKQGT | TYSSSYW        | IGILALLEVL | PLLMLWLS     | SLFHVLFFIVPRSA |
| 22_7439  | AVCFKIPDLWVQWW | STAIKQGT | TYSSSYW        | IGILALLEVL | PLLMLWLS     | SLFHVLFFIVPRSA |
| 23_3780  | AVCFKIPDLWVQWW | STAIKQGT | TYSSSYW        | IGILALLEVL | PLLMLWLS     | SLFHVLFFIVPRSA |
| 24_967   | AVCFKIPDLWVQWW | STAIKQGT | TYSSSYW        | IGILALLEVL | PLLMLWLS     | SLFHVLFFIVPRSA |
| 25_6595  | AVCFKIPDLWVQWW | STAIKQGT | TYSSSYW        | IGILALLEVL | PLLMLWLS     | SLFHVLFFIVPRSA |
| 26_8391  | AVCFKIPDLWVQWW | STAIKQGT | TYSSSYW        | IGILALLEVL | PLLMLWLS     | SLFHVLFFIVPRSA |
| 27_8170  | AVCFKIPDLWVQWW | STAIKQGT | TYSSSYW        | IGILALLEVL | PLLMLWLS     | SLFHVLFFIVPRSA |
| 28_5209  | AVCFKIPDLWVQWW | STAIKQGT | TYSSSYW        | IGILALLEVL | PLLMLWLS     | SLFHVLFFIVPRSA |
| 29_2181  | AVCFKIPDLWVQWW | STAIKQGT | TYSSSYW        | IGILALLEVL | PLLMLWLS     | SLFHVLFFIVPRSA |
| 30_8564  | AVCFKIPDLWVQWW | STAIKQGT | TYSSSYW        | IGILALLEVL | PLLMLWLS     | SLFHVLFFIVPRSA |
| 31_1582  | AVCFKIPDLWVQWW | STAIKQGT | TYSSSYW        | IGILALLEVL | PLLMLWLS     | SLFHVLFFIVPRSA |
| 32_4537  | AVCFKIPDLWVQWW | STAIKQGT | TYSSSYW        | IGILALLEVL | PLLMLWLS     | SLFHVLFFIVPRSA |
| 33_9418  | AVCFKIPDLWVQWW | STAIKQGT | TYSSSYW        | IGILALLEVL | PLLMLWLS     | SLFHVLFFIVPRSA |
| 34_1782  | AVCFKIPDLWVQWW | STAIKQGT | TYSSSYW        | IGILALLEVL | PLLMLWLS     | SLFHVLFFIVPRSA |
| 35_10360 | AVCFKIPDLWVQWW | STAIKQGT | TYSSSYW        | IGILALLEVL | PLLMLWLS     | SLFHVLFFIVPRSA |
| 36_468   | AVCFKIPDLWVQWW | STAIKQGT | TYSSSYW        | IGILALLEVL | PLLMLWLS     | SLFHVLFFIVPRSA |
| 37_4956  | AVCFKIPDLWVQWW | STAIKQGT | TYSSSYW        | IGILALLEVL | PLLMLWLS     | SLFHVLFFIVPRSA |
| 38_4305  | AVCFKIPDLWVQWW | STAIKQGT | TYSSSYW        | IGILALLEVL | PLLMLWLS     | SLFHVLFFIVPRSA |
| 39_4737  | AVCFKIPDLWVQWW | STAIKQGT | TYSSSYW        | IGILALLEVL | PLLMLWLS     | SLFHVLFFIVPRSA |
| 40_9543  | AVCFKIPDLWVQWW | STAIKQGT | TYSSSYW        | IGILALLEVL | PLLMLWLS     | SLFHVLFFIVPRSA |
| 41_6669  | AVCFKIPDLWVQWW | STAIKQGT | TYSSSYW        | IGILALLEVL | PLLMLWLS     | SLFHVLFFIVPRSA |
| 42_10558 | AVCFKIPDLWVQWW | STAIKQGT | TYSSSYW        | IGILALLEVL | PLLMLWLS     | SLFHVLFFIVPRSA |
| 43_8051  | AVCFKIPDLWVQWW | STAIKQGT | TYSSSYW        | IGILALLEVL | PLLMLWLS     | SLFHVLFFIVPRSA |
| 44_10454 | AVCFKIPDLWVQWW | STAIKQGT | TYSSSYW        | IGILALLEVL | PLLMLWLS     | SLFHVLFFIVPRSA |
| 45_10126 | AVCFKIPDLWVQWW | STAIKQGT | TYSSSYW        | IGILALLEVL | PLLMLWLS     | SLFHVLFFIVPRSA |
| 46_1547  | AVCFKIPDLWVQWW | STAIKQGT | TYSSSYW        | IGILALLEVL | PLLMLWLS     | SLFHVLFFIVPRSA |
| 47_6749  | AVCFKIPDLWVQWW | STAIKQGT | TYSSSYW        | IGILALLEVL | PLLMLWLS     | SLFHVLFFIVPRSA |
| 48_9982  | AVCFKIPDLWVQWW | STAIKQGT | TYSSSYW        | IGILALLEVL | PLLMLWLS     | SLFHVLFFIVPRSA |
| 49_7293  | AVCFKIPDLWVQWW | STAIKQGT | TYSSSYW        | IGILALLEVL | PLLMLWLS     | SLFHVLFFIVPRSA |
| 50_5993  | AVCFKIPDLWVQWW | STAIKQGT | TYSSSYW        | IGILALLEVL | PLLMLWLS     | SLFHVLFFIVPRSA |
| 51_4791  | AVCFKIPDLWVQWW | STAIKQGT | TYSSSYW        | IGILALLEVL | PLLMLWLS     | SLFHVLFFIVPRSA |
| 52_121   | AVCFKIPDLWVQWW | STAIKQGT | TYSSSYW        | IGILALLEVL | PLLMLWLS     | SLFHVLFFIVPRSA |
| 53_1667  | AVCFKIPDLWVQWW | STAIKQGT | TYSSSYW        | IGILALLEVL | PLLMLWLS     | SLFHVLFFIVPRSA |
| 54_10488 | AVCFKIPDLWVQWW | STAIKQGT | TYSSSYW        | IGILALLEVL | PLLMLWLS     | SLFHVLFFIVPRSA |
| 55_7733  | AVCFKIPDLWVQWW | STAIKQGT | TYSSSYW        | IGILALLEVL | PLLMLWLS     | SLFHVLFFIVPRSA |
| 56_3982  | AVCFKIPDLWVQWW | STAIKQGT | TYSSSYW        | IGILALLEVL | PLLMLWLS     | SLFHVLFFIVPRSA |
| 57_392   | AVCFKIPDLWVQWW | STAIKQGT | TYSSSYW        | IGILALLEVL | PLLMLWLS     | SLFHVLFFIVPRSA |
| 58_10291 | AVCFKIPDLWVQWW | STAIKQGT | TYSSSYW        | IGILALLEVL | PLLMLWLS     | SLFHVLFFIVPRSA |
| 59_5792  | AVCFKIPDLWVQWW | STAIKQGT | TYSSSYW        | IGILALLEVL | PLLMLWLS     | SLFHVLFFIVPRSA |
| 60_8712  | AVCFKIPDLWVQWW | STAIKQGT | TYSSSYW        | IGILALLEVL | PLLMLWLS     | SLFHVLFFIVPRSA |
| 61_6716  | AVCFKIPDLWVQWW | STAIKQGT | TYSSSYW        | IGILALLEVL | PLLMLWLS     | SLFHVLFFIVPRSA |
| 62_5599  | AVCFKIPDLWVQWW | STAIKQGT | TYSSSYW        | IGILALLEVL | PLLMLWLS     | SLFHVLFFIVPRSA |
| 63_304   | AVCFKIPDLWVQWW | STAIKQGT | TYSSSYW        | IGILALLEVL | PLLMLWLS     | SLFHVLFFIVPRSA |
| 64_10473 | .....          |          |                |            |              |                |
| 65_6310  | AVCFKIPDLWVQWW | STAIKQGT | TYSSSYW        | IGILALLEVL | PLLMLWLS     | SLFHVLFFIVPRSA |
| 66_8714  | AVCFKIPDLWVQWW | STAIKQGT | TYSSSYW        | IGILALLEVL | PLLMLWLS     | SLFHVLFFIVPRSA |
| 67_2350  | AVCFKIPDLWVQWW | STAIKQGT | TYSSSYW        | IGILALLEVL | PLLMLWLS     | SLFHVLFFIVPRSA |
| 68_2447  | AVCFKIPDLWVQWW | STAIKQGT | TYSSSYW        | IGILALLEVL | PLLMLWLS     | SLFHVLFFIVPRSA |
| 69_5658  | AVCFKIPDLWVQWW | STAIKQGT | TYSSSYW        | IGILALLEVL | PLLMLWLS     | SLFHVLFFIVPRSA |
| 70_1277  | AVCFKIPDLWVQWW | STAIKQGT | TYSSSYW        | IGILALLEVL | PLLMLWLS     | SLFHVLFFIVPRSA |
| 71_3717  | AVCFKIPDLWVQWW | STAIKQGT | TYSSSYW        | IGILALLEVL | PLLMLWLS     | SLFHVLFFIVPRSA |
| 72_7846  | AVCFKIPDLWVQWW | STAIKQGT | TYSSSYW        | IGILALLEVL | PLLMLWLS     | SLFHVLFFIVPRSA |
| 73_10528 | AVCFKIPDLWVQWW | STAIKQGT | TYSSSYW        | IGILALLEVL | PLLMLWLS     | SLFHVLFFIVPRSA |
| 74_4899  | AVCFKIPDLWVQWW | STAIKQGT | TYSSSYW        | IGILALLEVL | PLLMLWLS     | SLFHVLFFIVPRSA |
| 75_5507  | AVCFKIPDLWVQWW | STAIKQGT | TYSSSYW        | IGILALLEVL | PLLMLWLS     | SLFHVLFFIVPRSA |
| 76_5432  | AVCFKIPDLWVQWW | STAIKQGT | TYSSSYW        | IGILALLEVL | PLLMLWLS     | SLFHVLFFIVPRSA |
| 77_10770 | AVCFKIPDLWVQWW | STAIKQGT | TYSSSYW        | IGILALLEVL | PLLMLWLS     | SLFHVLFFIVPRSA |
| 78_5904  | AVCFKIPDLWVQWW | STAIKQGT | TYSSSYW        | IGILALLEVL | PLLMLWLS     | SLFHVLFFIVPRSA |
| 79_9653  | AVCFKIPDLWVQWW | STAIKQGT | TYSSSYW        | IGILALLEVL | PLLMLWLS     | SLFHVLFFIVPRSA |
| 80_4462  | AVCFKIPDLWVQWW | STAIKQGT | TYSSSYW        | IGILALLEVL | PLLMLWLS     | SLFHVLFFIVPRSA |
| 81_7194  | LALLEVL        | PLLMLWLS | SLFHVLFFIVPRSA | STMHDS     | LLRTVLLAPFGF | ISRVDTGSLMNRFN |
| 82_1022  | AVCFKIPDLWVQWW | STAIKQGT | TYSSSYW        | IGILALLEVL | PLLMLWLS     | SLFHVLFFIVPRSA |
| 83_9813  | AVCFKIPDLWVQWW | STAIKQGT | TYSSSYW        | IGILALLEVL | PLLMLWLS     | SLFHVLFFIVPRSA |
| 84_1902  | AVCFKIPDLWVQWW | STAIKQGT | TYSSSYW        | IGILALLEVL | PLLMLWLS     | SLFHVLFFIVPRSA |
| 85_5152  | AVCFKIPDLWVQWW | STAIKQGT | TYSSSYW        | IGILALLEVL | PLLMLWLS     | SLFHVLFFIVPRSA |
| 86_3385  | AVCFKIPDLWVQWW | STAIKQGT | TYSSSYW        | IGILALLEVL | PLLMLWLS     | SLFHVLFFIVPRSA |
| 87_10760 | AVCFKIPDLWVQWW | STAIKQGT | TYSSSYW        | IGILALLEVL | PLLMLWLS     | SLFHVLFFIVPRSA |
| 88_1588  | AVCFKIPDLWVQWW | STAIKQGT | TYSSSYW        | IGILALLEVL | PLLMLWLS     | SLFHVLFFIVPRSA |
| 89_1609  | AVCFKIPDLWVQWW | STAIKQGT | TYSSSYW        | IGILALLEVL | PLLMLWLS     | SLFHVLFFIVPRSA |
| 90_4023  | AVCFKIPDLWVQWW | STAIKQGT | TYSSSYW        | IGILALLEVL | PLLMLWLS     | SLFHVLFFIVPRSA |

|          | 970                                                          | 980 | 990 | 1000 | 1010 | 1020 |
|----------|--------------------------------------------------------------|-----|-----|------|------|------|
| 1_4160   | STMHDSLLRTVLLAPFGFISRVDTGSLMNRFNQDLMFVDTRLPIDLFNTSIDFFITIIQL |     |     |      |      |      |
| 2_6143   | STMHDSLLRTVLLAPFGFISRVDTGSLMNRFNQDLMFVDTRLPIDLFNTSIDFFITIIQL |     |     |      |      |      |
| 3_6554   | STMHDSLLRTVLLAPFGFISRVDTGSLMNRFNQDLMFVDTRLPIDLFNTSIDFFITIIQL |     |     |      |      |      |
| 4_111    | STMHDSLLRTVLLAPFGFISRVDTGSLMNRFNQDLMFVDTRLPIDLFNTSIDFFITIIQL |     |     |      |      |      |
| 5_5742   | STMHDSLLRTVLLAPFGFISRVDTGSLMNRFNQDLMFVDTRLPIDLFNTSIDFFITIIQL |     |     |      |      |      |
| 6_9490   | STMHDSLLRTVLLAPFGFISRVDTGSLMNRFNQDLMFVDTRLPIDLFNTSIDFFITIIQL |     |     |      |      |      |
| 7_6313   | .....                                                        |     |     |      |      |      |
| 8_2552   | STMHDSLLRTVLLAPFGFISRVDTGSLMNRFNQDLMFVDTRLPIDLFNTSIDFFITIIQL |     |     |      |      |      |
| 9_7745   | STMHDSLLRTVLLAPFGFISRVDTGSLMNRFNQDLMFVDTRLPIDLFNTSIDFFITIIQL |     |     |      |      |      |
| 10_2315  | STMHDSLLRTVLLAPFGFISRVDTGSLMNRFNQDLMFVDTRLPIDLFNTSIDFFITIIQL |     |     |      |      |      |
| 11_2035  | STMHDSLLRTVLLAPFGFISRVDTGSLMNRFNQDLMFVDTRLPIDLFNTSIDFFITIIQL |     |     |      |      |      |
| 12_9640  | STMHDSLLRTVLLAPFGFISRVDTGSLMNRFNQDLMFVDTRLPIDLFNTSIDFFITIIQL |     |     |      |      |      |
| 13_3674  | STMHDSLLRTVLLAPFGFISRVDTGSLMNRFNQDLMFVDTRLPIDLFNTSIDFFITIIQL |     |     |      |      |      |
| 14_6548  | STMHDSLLRTVLLAPFGFISRVDTGSLMNRFNQDLMFVDTRLPIDLFNTSIDFFITIIQL |     |     |      |      |      |
| 15_10828 | STMHDSLLRTVLLAPFGFISRVDTGSLMNRFNQDLMFVDTRLPIDLFNTSIDFFITIIQL |     |     |      |      |      |
| 16_6578  | STMHDSLLRTVLLAPFGFISRVDTGSLMNRFNQDLMFVDTRLPIDLFNTSIDFFITIIQL |     |     |      |      |      |
| 17_10233 | STMHDSLLRTVLLAPFGFISRVDTGSLMNRFNQDLMFVDTRLPIDLFNTSIDFFITIIQL |     |     |      |      |      |
| 18_9261  | STMHDSLLRTVLLAPFGFISRVDTGSLMNRFNQDLMFVDTRLPIDLFNTSIDFFITIIQL |     |     |      |      |      |
| 19_8450  | STMHDSLLRTVLLAPFGFISRVDTGSLMNRFNQDLMFVDTRLPIDLFNTSIDFFITIIQL |     |     |      |      |      |
| 20_1727  | STMHDSLLRTVLLAPFGFISRVDTGSLMNRFNQDLMFVDTRLPIDLFNTSIDFFITIIQL |     |     |      |      |      |
| 21_206   | STMHDSLLRTVLLAPFGFISRVDTGSLMNRFNQDLMFVDTRLPIDLFNTSIDFFITIIQL |     |     |      |      |      |
| 22_7439  | STMHDSLLRTVLLAPFGFISRVDTGSLMNRFNQDLMFVDTRLPIDLFNTSIDFFITIIQL |     |     |      |      |      |
| 23_3780  | STMHDSLLRTVLLAPFGFISRVDTGSLMNRFNQDLMFVDTRLPIDLFNTSIDFFITIIQL |     |     |      |      |      |
| 24_967   | STMHDSLLRTVLLAPFGFISRVDTGSLMNRFNQDLMFVDTRLPIDLFNTSIDFFITIIQL |     |     |      |      |      |
| 25_6595  | STMHDSLLRTVLLAPFGFISRVDTGSLMNRFNQDLMFVDTRLPIDLFNTSIDFFITIIQL |     |     |      |      |      |
| 26_8391  | STMHDSLLRTVLLAPFGFISRVDTGSLMNRFNQDLMFVDTRLPIDLFNTSIDFFITIIQL |     |     |      |      |      |
| 27_8170  | STMHDSLLRTVLLAPFGFISRVDTGSLMNRFNQDLMFVDTRLPIDLFNTSIDFFITIIQL |     |     |      |      |      |
| 28_5209  | STMHDSLLRTVLLAPFGFISRVDTGSLMNRFNQDLMFVDTRLPIDLFNTSIDFFITIIQL |     |     |      |      |      |
| 29_2181  | STMHDSLLRTVLLAPFGFISRVDTGSLMNRFNQDLMFVDTRLPIDLFNTSIDFFITIIQL |     |     |      |      |      |
| 30_8564  | STMHDSLLRTVLLAPFGFISRVDTGSLMNRFNQDLMFVDTRLPIDLFNTSIDFFITIIQL |     |     |      |      |      |
| 31_1582  | STMHDSLLRTVLLAPFGFISRVDTGSLMNRFNQDLMFVDTRLPIDLFNTSIDFFITIIQL |     |     |      |      |      |
| 32_4537  | STMHDSLLRTVLLAPFGFISRVDTGSLMNRFNQDLMFVDTRLPIDLFNTSIDFFITIIQL |     |     |      |      |      |
| 33_9418  | STMHDSLLRTVLLAPFGFISRVDTGSLMNRFNQDLMFVDTRLPIDLFNTSIDFFITIIQL |     |     |      |      |      |
| 34_1782  | STMHDSLLRTVLLAPFGFISRVDTGSLMNRFNQDLMFVDTRLPIDLFNTSIDFFITIIQL |     |     |      |      |      |
| 35_10360 | STMHDSLLRTVLLAPFGFISRVDTGSLMNRFNQDLMFVDTRLPIDLFNTSIDFFITIIQL |     |     |      |      |      |
| 36_468   | STMHDSLLRTVLLAPFGFISRVDTGSLMNRFNQDLMFVDTRLPIDLFNTSIDFFITIIQL |     |     |      |      |      |
| 37_4956  | STMHDSLLRTVLLAPFGFISRVDTGSLMNRFNQDLMFVDTRLPIDLFNTSIDFFITIIQL |     |     |      |      |      |
| 38_4305  | STMHDSLLRTVLLAPFGFISRVDTGSLMNRFNQDLMFVDTRLPIDLFNTSIDFFITIIQL |     |     |      |      |      |
| 39_4737  | STMHDSLLRTVLLAPFGFISRVDTGSLMNRFNQDLMFVDTRLPIDLFNTSIDFFITIIQL |     |     |      |      |      |
| 40_9543  | STMHDSLLRTVLLAPFGFISRVDTGSLMNRFNQDLMFVDTRLPIDLFNTSIDFFITIIQL |     |     |      |      |      |
| 41_6669  | STMHDSLLRTVLLAPFGFISRVDTGSLMNRFNQDLMFVDTRLPIDLFNTSIDFFITIIQL |     |     |      |      |      |
| 42_10558 | STMHDSLLRTVLLAPFGFISRVDTGSLMNRFNQDLMFVDTRLPIDLFNTSIDFFITIIQL |     |     |      |      |      |
| 43_8051  | STMHDSLLRTVLLAPFGFISRVDTGSLMNRFNQDLMFVDTRLPIDLFNTSIDFFITIIQL |     |     |      |      |      |
| 44_10454 | STMHDSLLRTVLLAPFGFISRVDTGSLMNRFNQDLMFVDTRLPIDLFNTSIDFFITIIQL |     |     |      |      |      |
| 45_10126 | STMHDSLLRTVLLAPFGFISRVDTGSLMNRFNQDLMFVDTRLPIDLFNTSIDFFITIIQL |     |     |      |      |      |
| 46_1547  | STMHDSLLRTVLLAPFGFISRVDTGSLMNRFNQDLMFVDTRLPIDLFNTSIDFFITIIQL |     |     |      |      |      |
| 47_6749  | STMHDSLLRTVLLAPFGFISRVDTGSLMNRFNQDLMFVDTRLPIDLFNTSIDFFITIIQL |     |     |      |      |      |
| 48_9982  | STMHDSLLRTVLLAPFGFISRVDTGSLMNRFNQDLMFVDTRLPIDLFNTSIDFFITIIQL |     |     |      |      |      |
| 49_7293  | STMHDSLLRTVLLAPFGFISRVDTGSLMNRFNQDLMFVDTRLPIDLFNTSIDFFITIIQL |     |     |      |      |      |
| 50_5993  | STMHDSLLRTVLLAPFGFISRVDTGSLMNRFNQDLMFVDTRLPIDLFNTSIDFFITIIQL |     |     |      |      |      |
| 51_4791  | STMHDSLLRTVLLAPFGFISRVDTGSLMNRFNQDLMFVDTRLPIDLFNTSIDFFITIIQL |     |     |      |      |      |
| 52_121   | STMHDSLLRTVLLAPFGFISRVDTGSLMNRFNQDLMFVDTRLPIDLFNTSIDFFITIIQL |     |     |      |      |      |
| 53_1667  | STMHDSLLRTVLLAPFGFISRVDTGSLMNRFNQDLMFVDTRLPIDLFNTSIDFFITIIQL |     |     |      |      |      |
| 54_10488 | STMHDSLLRTVLLAPFGFISRVDTGSLMNRFNQDLMFVDTRLPIDLFNTSIDFFITIIQL |     |     |      |      |      |
| 55_7733  | STMHDSLLRTVLLAPFGFISRVDTGSLMNRFNQDLMFVDTRLPIDLFNTSIDFFITIIQL |     |     |      |      |      |
| 56_3982  | STMHDSLLRTVLLAPFGFISRVDTGSLMNRFNQDLMFVDTRLPIDLFNTSIDFFITIIQL |     |     |      |      |      |
| 57_392   | STMHDSLLRTVLLAPFGFISRVDTGSLMNRFNQDLMFVDTRLPIDLFNTSIDFFITIIQL |     |     |      |      |      |
| 58_10291 | STMHDSLLRTVLLAPFGFISRVDTGSLMNRFNQDLMFVDTRLPIDLFNTSIDFFITIIQL |     |     |      |      |      |
| 59_5792  | STMHDSLLRTVLLAPFGFISRVDTGSLMNRFNQDLMFVDTRLPIDLFNTSIDFFITIIQL |     |     |      |      |      |
| 60_8712  | STMHDSLLRTVLLAPFGFISRVDTGSLMNRFNQDLMFVDTRLPIDLFNTSIDFFITIIQL |     |     |      |      |      |
| 61_6716  | STMHDSLLRTVLLAPFGFISRVDTGSLMNRFNQDLMFVDTRLPIDLFNTSIDFFITIIQL |     |     |      |      |      |
| 62_5599  | STMHDSLLRTVLLAPFGFISRVDTGSLMNRFNQDLMFVDTRLPIDLFNTSIDFFITIIQL |     |     |      |      |      |
| 63_304   | STMHDSLLRTVLLAPFGFISRVDTGSLMNRFNQDLMFVDTRLPIDLFNTSIDFFITIIQL |     |     |      |      |      |
| 64_10473 | .....                                                        |     |     |      |      |      |
| 65_6310  | STMHDSLLRTVLLAPFGFISRVDTGSLMNRFNQDLMFVDTRLPIDLFNTSIDFFITIIQL |     |     |      |      |      |
| 66_8714  | STMHDSLLRTVLLAPFGFISRVDTGSLMNRFNQDLMFVDTRLPIDLFNTSIDFFITIIQL |     |     |      |      |      |
| 67_2350  | STMHDSLLRTVLLAPFGFISRVDTGSLMNRFNQDLMFVDTRLPIDLFNTSIDFFITIIQL |     |     |      |      |      |
| 68_2447  | STMHDSLLRTVLLAPFGFISRVDTGSLMNRFNQDLMFVDTRLPIDLFNTSIDFFITIIQL |     |     |      |      |      |
| 69_5658  | STMHDSLLRTVLLAPFGFISRVDTGSLMNRFNQDLMFVDTRLPIDLFNTSIDFFITIIQL |     |     |      |      |      |
| 70_1277  | STMHDSLLRTVLLAPFGFISRVDTGSLMNRFNQDLMFVDTRLPIDLFNTSIDFFITIIQL |     |     |      |      |      |
| 71_3717  | STMHDSLLRTVLLAPFGFISRVDTGSLMNRFNQDLMFVDTRLPIDLFNTSIDFFITIIQL |     |     |      |      |      |
| 72_7846  | STMHDSLLRTVLLAPFGFISRVDTGSLMNRFNQDLMFVDTRLPIDLFNTSIDFFITIIQL |     |     |      |      |      |
| 73_10528 | STMHDSLLRTVLLAPFGFISRVDTGSLMNRFNQDLMFVDTRLPIDLFNTSIDFFITIIQL |     |     |      |      |      |
| 74_4899  | STMHDSLLRTVLLAPFGFISRVDTGSLMNRFNQDLMFVDTRLPIDLFNTSIDFFITIIQL |     |     |      |      |      |
| 75_5507  | STMHDSLLRTVLLAPFGFISRVDTGSLMNRFNQDLMFVDTRLPIDLFNTSIDFFITIIQL |     |     |      |      |      |
| 76_5432  | STMHDSLLRTVLLAPFGFISRVDTGSLMNRFNQDLMFVDTRLPIDLFNTSIDFFITIIQL |     |     |      |      |      |
| 77_10770 | STMHDSLLRTVLLAPFGFISRVDTGSLMNRFNQDLMFVDTRLPIDLFNTSIDFFITIIQL |     |     |      |      |      |
| 78_5904  | STMHDSLLRTVLLAPFGFISRVDTGSLMNRFNQDLMFVDTRLPIDLFNTSIDFFITIIQL |     |     |      |      |      |
| 79_9653  | STMHDSLLRTVLLAPFGFISRVDTGSLMNRFNQDLMFVDTRLPIDLFNTSIDFFITIIQL |     |     |      |      |      |
| 80_4462  | STMHDSLLRTVLLAPFGFISRVDTGSLMNRFNQDLMFVDTRLPIDLFNTSIDFFITIIQL |     |     |      |      |      |
| 81_7194  | QDLMFVDTRLPIDLFNTSIDFFITIIQLILVVLVSKEALAILPVVFGALYLIQKVYLRSS |     |     |      |      |      |
| 82_1022  | STMHDSLLRTVLLAPFGFISRVDTGSLMNRFNQDLMFVDTRLPIDLFNTSIDFFITIIQL |     |     |      |      |      |
| 83_9813  | STMHDSLLRTVLLAPFGFISRVDTGSLMNRFNQDLMFVDTRLPIDLFNTSIDFFITIIQL |     |     |      |      |      |
| 84_1902  | STMHDSLLRTVLLAPFGFISRVDTGSLMNRFNQDLMFVDTRLPIDLFNTSIDFFITIIQL |     |     |      |      |      |
| 85_5152  | STMHDSLLRTVLLAPFGFISRVDTGSLMNRFNQDLMFVDTRLPIDLFNTSIDFFITIIQL |     |     |      |      |      |
| 86_3385  | STMHDSLLRTVLLAPFGFISRVDTGSLMNRFNQDLMFVDTRLPIDLFNTSIDFFITIIQL |     |     |      |      |      |
| 87_10760 | STMHDSLLRTVLLAPFGFISRVDTGSLMNRFNQDLMFVDTRLPIDLFNTSIDFFITIIQL |     |     |      |      |      |
| 88_1588  | STMHDSLLRTVLLAPFGFISRVDTGSLMNRFNQDLMFVDTRLPIDLFNTSIDFFITIIQL |     |     |      |      |      |
| 89_1609  | STMHDSLLRTVLLAPFGFISRVDTGSLMNRFNQDLMFVDTRLPIDLFNTSIDFFITIIQL |     |     |      |      |      |
| 90_4023  | STMHDSLLRTVLLAPFGFISRVDTGSLMNRFNQDLMFVDTRLPIDLFNTSIDFFITIIQL |     |     |      |      |      |

|          | 1030                                                          | 1040 | 1050 | 1060 | 1070 | 1080 |
|----------|---------------------------------------------------------------|------|------|------|------|------|
| 1_4160   | ILVVLSKEALAILPVVFGALYLIQKVYLRSSKQLRLLDLDWKADLHTAFGETTAGLSVI   |      |      |      |      |      |
| 2_6143   | ILVVLSKEALAILPVVFGALYLIQKVYLRSSKQLRLLDLDWKADLHTAFGETTAGLSVI   |      |      |      |      |      |
| 3_6554   | ILVVLSKEALAILPVVFGALYLIQKVYLRSSKQLRLLDLDWKADLHTAFGETTAGLSVI   |      |      |      |      |      |
| 4_111    | ILVVLSKEALAILPVVFGALYLIQKVYLRSSKQLRLLDLDWKADLHTAFGETTAGLSVI   |      |      |      |      |      |
| 5_5742   | ILVVLSKEALAILPVVFGALYLIQKVYLRSSKQLRLLDLDWKADLHTAFGETTAGLSVI   |      |      |      |      |      |
| 6_9490   | ILVVLSKEALAILPVVFGALYLIQKVYLRSSKQLRLLDLDWKADLHTAFGETTAGLSVI   |      |      |      |      |      |
| 7_6313   | .....                                                         |      |      |      |      |      |
| 8_2552   | ILVVLSKEALAILPVVFGALYLIQKVYLRSSKQLRLLDLDWKADLHTAFGETTAGLSVI   |      |      |      |      |      |
| 9_7745   | ILVVLSKEALAILPVVFGALYLIQKVYLRSSKQLRLLDLDWKADLHTAFGETTAGLSVI   |      |      |      |      |      |
| 10_2315  | ILVVLSKEALAILPVVFGALYLIQKVYLRSSKQLRLLDLDWKADLHTAFGETTAGLSVI   |      |      |      |      |      |
| 11_2035  | ILVVLSKEALAILPVVFGALYLIQKVYLRSSKQLRLLDLDWKADLHTAFGETTAGLSVI   |      |      |      |      |      |
| 12_9640  | ILVVLSKEALAILPVVFGALYLIQKVYLRSSKQLRLLDLDWKADLHTAFGETTAGLSVI   |      |      |      |      |      |
| 13_3674  | ILVVLSKEALAILPVVFGALYLIQKVYLRSSKQLRLLDLDWKADLHTAFGETTAGLSVI   |      |      |      |      |      |
| 14_6548  | ILVVLSKEALAILPVVFGALYLIQKVYLRSSKQLRLLDLDWKADLHTAFGETTAGLSVI   |      |      |      |      |      |
| 15_10828 | ILVVLSKEALAILPVVFGALYLIQKVYLRSSKQLRLLDLDWKADLHTAFGETTAGLSVI   |      |      |      |      |      |
| 16_6578  | ILVVLSKEALAILPVVFGALYLIQKVYLRSSKQLRLLDLDWKADLHTAFGETTAGLSVI   |      |      |      |      |      |
| 17_10233 | ILVVLSKEALAILPVVFGALYLIQKVYLRSSKQLRLLDLDWKADLHTAFGETTAGLSVI   |      |      |      |      |      |
| 18_9261  | ILVVLSKEALAILPVVFGALYLIQKVYLRSSKQLRLLDLDWKADLHTAFGETTAGLSVI   |      |      |      |      |      |
| 19_8450  | ILVVLSKEALAILPVVFGALYLIQKVYLRSSKQLRLLDLDWKADLHTAFGETTAGLSVI   |      |      |      |      |      |
| 20_1727  | ILVVLSKEALAILPVVFGALYLIQKVYLRSSKQLRLLDLDWKADLHTAFGETTAGLSVI   |      |      |      |      |      |
| 21_206   | ILVVLSKEALAILPVVFGALYLIQKVYLRSSKQLRLLDLDWKADLHTAFGETTAGLSVI   |      |      |      |      |      |
| 22_7439  | ILVVLSKEALAILPVVFGALYLIQKVYLRSSKQLRLLDLDWKADLHTAFGETTAGLSVI   |      |      |      |      |      |
| 23_3780  | ILVVLSKEALAILPVVFGALYLIQKVYLRSSKQLRLLDLDWKADLHTAFGETTAGLSVI   |      |      |      |      |      |
| 24_967   | ILVVLSKEALAILPVVFGALYLIQKVYLRSSKQLRLLDLDWKADLHTAFGETTAGLSVI   |      |      |      |      |      |
| 25_6595  | ILVVLSKEALAILPVVFGALYLIQKVYLRSSKQLRLLDLDWKADLHTAFGETTAGLSVI   |      |      |      |      |      |
| 26_8391  | ILVVLSKEALAILPVVFGALYLIQKVYLRSSKQLRLLDLDWKADLHTAFGETTAGLSVI   |      |      |      |      |      |
| 27_8170  | ILVVLSKEALAILPVVFGALYLIQKVYLRSSKQLRLLDLDWKADLHTAFGETTAGLSVI   |      |      |      |      |      |
| 28_5209  | ILVVLSKEALAILPVVFGALYLIQKVYLRSSKQLRLLDLDWKADLHTAFGETTAGLSVI   |      |      |      |      |      |
| 29_2181  | ILVVLSKEALAILPVVFGALYLIQKVYLRSSKQLRLLDLDWKADLHTAFGETTAGLSVI   |      |      |      |      |      |
| 30_8564  | ILVVLSKEALAILPVVFGALYLIQKVYLRSSKQLRLLDLDWKADLHTAFGETTAGLSVI   |      |      |      |      |      |
| 31_1582  | ILVVLSKEALAILPVVFGALYLIQKVYLRSSKQLRLLDLDWKADLHTAFGETTAGLSVI   |      |      |      |      |      |
| 32_4537  | ILVVLSKEALAILPVVFGALYLIQKVYLRSSKQLRLLDLDWKADLHTAFGETTAGLSVI   |      |      |      |      |      |
| 33_9418  | ILVVLSKEALAILPVVFGALYLIQKVYLRSSKQLRLLDLDWKADLHTAFGETTAGLSVI   |      |      |      |      |      |
| 34_1782  | ILVVLSKEALAILPVVFGALYLIQKVYLRSSKQLRLLDLDWKADLHTAFGETTAGLSVI   |      |      |      |      |      |
| 35_10360 | ILVVLSKEALAILPVVFGALYLIQKVYLRSSKQLRLLDLDWKADLHTAFGETTAGLSVI   |      |      |      |      |      |
| 36_468   | ILVVLSKEALAILPVVFGALYLIQKVYLRSSKQLRLLDLDWKADLHTAFGETTAGLSVI   |      |      |      |      |      |
| 37_4956  | ILVVLSKEALAILPVVFGALYLIQKVYLRSSKQLRLLDLDWKADLHTAFGETTAGLSVI   |      |      |      |      |      |
| 38_4305  | ILVVLSKEALAILPVVFGALYLIQKVYLRSSKQLRLLDLDWKADLHTAFGETTAGLSVI   |      |      |      |      |      |
| 39_4737  | ILVVLSKEALAILPVVFGALYLIQKVYLRSSKQLRLLDLDWKADLHTAFGETTAGLSVI   |      |      |      |      |      |
| 40_9543  | ILVVLSKEALAILPVVFGALYLIQKVYLRSSKQLRLLDLDWKADLHTAFGETTAGLSVI   |      |      |      |      |      |
| 41_6669  | ILVVLSKEALAILPVVFGALYLIQKVYLRSSKQLRLLDLDWKADLHTAFGETTAGLSVI   |      |      |      |      |      |
| 42_10558 | ILVVLSKEALAILPVVFGALYLIQKVYLRSSKQLRLLDLDWKADLHTAFGETTAGLSVI   |      |      |      |      |      |
| 43_8051  | ILVVLSKEALAILPVVFGALYLIQKVYLRSSKQLRLLDLDWKADLHTAFGETTAGLSVI   |      |      |      |      |      |
| 44_10454 | ILVVLSKEALAILPVVFGALYLIQKVYLRSSKQLRLLDLDWKADLHTAFGETTAGLSVI   |      |      |      |      |      |
| 45_10126 | ILVVLSKEALAILPVVFGALYLIQKVYLRSSKQLRLLDLDWKADLHTAFGETTAGLSVI   |      |      |      |      |      |
| 46_1547  | ILVVLSKEALAILPVVFGALYLIQKVYLRSSKQLRLLDLDWKADLHTAFGETTAGLSVI   |      |      |      |      |      |
| 47_6749  | ILVVLSKEALAILPVVFGALYLIQKVYLRSSKQLRLLDLDWKADLHTAFGETTAGLSVI   |      |      |      |      |      |
| 48_9982  | ILVVLSKEALAILPVVFGALYLIQKVYLRSSKQLRLLDLDWKADLHTAFGETTAGLSVI   |      |      |      |      |      |
| 49_7293  | ILVVLSKEALAILPVVFGALYLIQKVYLRSSKQLRLLDLDWKADLHTAFGETTAGLSVI   |      |      |      |      |      |
| 50_5993  | ILVVLSKEALAILPVVFGALYLIQKVYLRSSKQLRLLDLDWKADLHTAFGETTAGLSVI   |      |      |      |      |      |
| 51_4791  | ILVVLSKEALAILPVVFGALYLIQKVYLRSSKQLRLLDLDWKADLHTAFGETTAGLSVI   |      |      |      |      |      |
| 52_121   | ILVVLSKEALAILPVVFGALYLIQKVYLRSSKQLRLLDLDWKADLHTAFGETTAGLSVI   |      |      |      |      |      |
| 53_1667  | ILVVLSKEALAILPVVFGALYLIQKVYLRSSKQLRLLDLDWKADLHTAFGETTAGLSVI   |      |      |      |      |      |
| 54_10488 | ILVVLSKEALAILPVVFGALYLIQKVYLRSSKQLRLLDLDWKADLHTAFGETTAGLSVI   |      |      |      |      |      |
| 55_7733  | ILVVLSKEALAILPVVFGALYLIQKVYLRSSKQLRLLDLDWKADLHTAFGETTAGLSVI   |      |      |      |      |      |
| 56_3982  | ILVVLSKEALAILPVVFGALYLIQKVYLRSSKQLRLLDLDWKADLHTAFGETTAGLSVI   |      |      |      |      |      |
| 57_392   | ILVVLSKEALAILPVVFGALYLIQKVYLRSSKQLRLLDLDWKADLHTAFGETTAGLSVI   |      |      |      |      |      |
| 58_10291 | ILVVLSKEALAILPVVFGALYLIQKVYLRSSKQLRLLDLDWKADLHTAFGETTAGLSVI   |      |      |      |      |      |
| 59_5792  | ILVVLSKEALAILPVVFGALYLIQKVYLRSSKQLRLLDLDWKADLHTAFGETTAGLSVI   |      |      |      |      |      |
| 60_8712  | ILVVLSKEALAILPVVFGALYLIQKVYLRSSKQLRLLDLDWKADLHTAFGETTAGLSVI   |      |      |      |      |      |
| 61_6716  | ILVVLSKEALAILPVVFGALYLIQKVYLRSSKQLRLLDLDWKADLHTAFGETTAGLSVI   |      |      |      |      |      |
| 62_5599  | ILVVLSKEALAILPVVFGALYLIQKVYLRSSKQLRLLDLDWKADLHTAFGETTAGLSVI   |      |      |      |      |      |
| 63_304   | ILVVLSKEALAILPVVFGALYLIQKVYLRSSKQLRLLDLDWKADLHTAFGETTAGLSVI   |      |      |      |      |      |
| 64_10473 | .....                                                         |      |      |      |      |      |
| 65_6310  | ILVVLSKEALAILPVVFGALYLIQKVYLRSSKQLRLLDLDWKADLHTAFGETTAGLSVI   |      |      |      |      |      |
| 66_8714  | ILVVLSKEALAILPVVFGALYLIQKVYLRSSKQLRLLDLDWKADLHTAFGETTAGLSVI   |      |      |      |      |      |
| 67_2350  | ILVVLSKEALAILPVVFGALYLIQKVYLRSSKQLRLLDLDWKADLHTAFGETTAGLSVI   |      |      |      |      |      |
| 68_2447  | ILVVLSKEALAILPVVFGALYLIQKVYLRSSKQLRLLDLDWKADLHTAFGETTAGLSVI   |      |      |      |      |      |
| 69_5658  | ILVVLSKEALAILPVVFGALYLIQKVYLRSSKQLRLLDLDWKADLHTAFGETTAGLSVI   |      |      |      |      |      |
| 70_1277  | ILVVLSKEALAILPVVFGALYLIQKVYLRSSKQLRLLDLDWKADLHTAFGETTAGLSVI   |      |      |      |      |      |
| 71_3717  | ILVVLSKEALAILPVVFGALYLIQKVYLRSSKQLRLLDLDWKADLHTAFGETTAGLSVI   |      |      |      |      |      |
| 72_7846  | ILVVLSKEALAILPVVFGALYLIQKVYLRSSKQLRLLDLDWKADLHTAFGETTAGLSVI   |      |      |      |      |      |
| 73_10528 | ILVVLSKEALAILPVVFGALYLIQKVYLRSSKQLRLLDLDWKADLHTAFGETTAGLSVI   |      |      |      |      |      |
| 74_4899  | ILVVLSKEALAILPVVFGALYLIQKVYLRSSKQLRLLDLDWKADLHTAFGETTAGLSVI   |      |      |      |      |      |
| 75_5507  | ILVVLSKEALAILPVVFGALYLIQKVYLRSSKQLRLLDLDWKADLHTAFGETTAGLSVI   |      |      |      |      |      |
| 76_5432  | ILVVLSKEALAILPVVFGALYLIQKVYLRSSKQLRLLDLDWKADLHTAFGETTAGLSVI   |      |      |      |      |      |
| 77_10770 | ILVVLSKEALAILPVVFGALYLIQKVYLRSSKQLRLLDLDWKADLHTAFGETTAGLSVI   |      |      |      |      |      |
| 78_5904  | ILVVLSKEALAILPVVFGALYLIQKVYLRSSKQLRLLDLDWKADLHTAFGETTAGLSVI   |      |      |      |      |      |
| 79_9653  | ILVVLSKEALAILPVVFGALYLIQKVYLRSSKQLRLLDLDWKADLHTAFGETTAGLSVI   |      |      |      |      |      |
| 80_4462  | ILVVLSKEALAILPVVFGALYLIQKVYLRSSKQLRLLDLDWKADLHTAFGETTAGLSVI   |      |      |      |      |      |
| 81_7194  | KQLRLLDLDWKADLHTAFGETTAGLSVIRANGWLDPMRAKFAEKLDRSQEPFYLLYLMVQR |      |      |      |      |      |
| 82_1022  | ILVVLSKEALAILPVVFGALYLIQKVYLRSSKQLRLLDLDWKADLHTAFGETTAGLSVI   |      |      |      |      |      |
| 83_9813  | ILVVLSKEALAILPVVFGALYLIQKVYLRSSKQLRLLDLDWKADLHTAFGETTAGLSVI   |      |      |      |      |      |
| 84_1902  | ILVVLSKEALAILPVVFGALYLIQKVYLRSSKQLRLLDLDWKADLHTAFGETTAGLSVI   |      |      |      |      |      |
| 85_5152  | ILVVLSKEALAILPVVFGALYLIQKVYLRSSKQLRLLDLDWKADLHTAFGETTAGLSVI   |      |      |      |      |      |
| 86_3385  | ILVVLSKEALAILPVVFGALYLIQKVYLRSSKQLRLLDLDWKADLHTAFGETTAGLSVI   |      |      |      |      |      |
| 87_10760 | ILVVLSKEALAILPVVFGALYLIQKVYLRSSKQLRLLDLDWKADLHTAFGETTAGLSVI   |      |      |      |      |      |
| 88_1588  | ILVVLSKEALAILPVVFGALYLIQKVYLRSSKQLRLLDLDWKADLHTAFGETTAGLSVI   |      |      |      |      |      |
| 89_1609  | ILVVLSKEALAILPVVFGALYLIQKVYLRSSKQLRLLDLDWKADLHTAFGETTAGLSVI   |      |      |      |      |      |
| 90_4023  | ILVVLSKEALAILPVVFGALYLIQKVYLRSSKQLRLLDLDWKADLHTAFGETTAGLSVI   |      |      |      |      |      |

|          | 1090                 | 1100     | 1110          | 1120                             | 1130 | 1140          |
|----------|----------------------|----------|---------------|----------------------------------|------|---------------|
| 1_4160   | RANGWLDPMRAKFAEKLDRS | QEPFYLLY | MVQRWLQ       | LVNLVVAGL                        | AI   | AIAGVAIGLRDKV |
| 2_6143   | RANGWLDPMRAKFAEKLDRS | QEPFYLLY | MVQRWLQ       | LVNLVVAGL                        | AI   | AIAGVAIGLRDKV |
| 3_6554   | RANGWLDPMRAKFAEKLDRS | QEPFYLLY | MVQRWLQ       | LVNLVVAGL                        | AI   | AIAGVAIGLRDKV |
| 4_111    | RANGWLDPMRAKFAEKLDRS | QEPFYLLY | MVQRWLQ       | LVNLVVAGL                        | AI   | AIAGVAIGLRDKV |
| 5_5742   | RANGWLDPMRAKFAEKLDRS | QEPFYLLY | MVQRWLQ       | LVNLVVAGL                        | AI   | AIAGVAIGLRDKV |
| 6_9490   | RANGWLDPMRAKFAEKLDRS | QEPFYLLY | MVQRWLQ       | LVNLVVAGL                        | AI   | AIAGVAIGLRDKV |
| 7_6313   | .....                |          |               |                                  |      |               |
| 8_2552   | RANGWLDPMRAKFAEKLDRS | QEPFYLLY | MVQRWLQ       | LVNLVVAGL                        | AI   | AIAGVAIGLRDKV |
| 9_7745   | RANGWLDPMRAKFAEKLDRS | QEPFYLLY | MVQRWLQ       | LVNLVVAGL                        | AI   | AIAGVAIGLRDKV |
| 10_2315  | RANGWLDPMRAKFAEKLDRS | QEPFYLLY | MVQRWLQ       | LVNLVVAGL                        | AI   | AIAGVAIGLRDKV |
| 11_2035  | RANGWLDPMRAKFAEKLDRS | QEPFYLLY | MVQRWLQ       | LVNLVVAGL                        | AI   | AIAGVAIGLRDKV |
| 12_9640  | RANGWLDPMRAKFAEKLDRS | QEPFYLLY | MVQRWLQ       | LVNLVVAGL                        | AI   | AIAGVAIGLRDKV |
| 13_3674  | RANGWLDPMRAKFAEKLDRS | QEPFYLLY | MVQRWLQ       | LVNLVVAGL                        | AI   | AIAGVAIGLRDKV |
| 14_6548  | RANGWLDPMRAKFAEKLDRS | QEPFYLLY | MVQRWLQ       | LVNLVVAGL                        | AI   | AIAGVAIGLRDKV |
| 15_10828 | RANGWLDPMRAKFAEKLDRS | QEPFYLLY | MVQRWLQ       | LVNLVVAGL                        | AI   | AIAGVAIGLRDKV |
| 16_6578  | RANGWLDPMRAKFAEKLDRS | QEPFYLLY | MVQRWLQ       | LVNLVVAGL                        | AI   | AIAGVAIGLRDKV |
| 17_10233 | RANGWLDPMRAKFAEKLDRS | QEPFYLLY | MVQRWLQ       | LVNLVVAGL                        | AI   | AIAGVAIGLRDKV |
| 18_9261  | RANGWLDPMRAKFAEKLDRS | QEPFYLLY | MVQRWLQ       | LVNLVVAGL                        | AI   | AIAGVAIGLRDKV |
| 19_8450  | RANGWLDPMRAKFAEKLDRS | QEPFYLLY | MVQRWLQ       | LVNLVVAGL                        | AI   | AIAGVAIGLRDKV |
| 20_1727  | RANGWLDPMRAKFAEKLDRS | QEPFYLLY | MVQRWLQ       | LVNLVVAGL                        | AI   | AIAGVAIGLRDKV |
| 21_206   | RANGWLDPMRAKFAEKLDRS | QEPFYLLY | MVQRWLQ       | LVNLVVAGL                        | AI   | AIAGVAIGLRDKV |
| 22_7439  | RANGWLDPMRAKFAEKLDRS | QEPFYLLY | MVQRWLQ       | LVNLVVAGL                        | AI   | AIAGVAIGLRDKV |
| 23_3780  | RANGWLDPMRAKFAEKLDRS | QEPFYLLY | MVQRWLQ       | LVNLVVAGL                        | AI   | AIAGVAIGLRDKV |
| 24_967   | RANGWLDPMRAKFAEKLDRS | QEPFYLLY | MVQRWLQ       | LVNLVVAGL                        | AI   | AIAGVAIGLRDKV |
| 25_6595  | RANGWLDPMRAKFAEKLDRS | QEPFYLLY | MVQRWLQ       | LVNLVVAGL                        | AI   | AIAGVAIGLRDKV |
| 26_8391  | RANGWLDPMRAKFAEKLDRS | QEPFYLLY | MVQRWLQ       | LVNLVVAGL                        | AI   | AIAGVAIGLRDKV |
| 27_8170  | RANGWLDPMRAKFAEKLDRS | QEPFYLLY | MVQRWLQ       | LVNLVVAGL                        | AI   | AIAGVAIGLRDKV |
| 28_5209  | RANGWLDPMRAKFAEKLDRS | QEPFYLLY | MVQRWLQ       | LVNLVVAGL                        | AI   | AIAGVAIGLRDKV |
| 29_2181  | RANGWLDPMRAKFAEKLDRS | QEPFYLLY | MVQRWLQ       | LVNLVVAGL                        | AI   | AIAGVAIGLRDKV |
| 30_8564  | RANGWLDPMRAKFAEKLDRS | QEPFYLLY | MVQRWLQ       | LVNLVVAGL                        | AI   | AIAGVAIGLRDKV |
| 31_1582  | RANGWLDPMRAKFAEKLDRS | QEPFYLLY | MVQRWLQ       | LVNLVVAGL                        | AI   | AIAGVAIGLRDKV |
| 32_4537  | RANGWLDPMRAKFAEKLDRS | QEPFYLLY | MVQRWLQ       | LVNLVVAGL                        | AI   | AIAGVAIGLRDKV |
| 33_9418  | RANGWLDPMRAKFAEKLDRS | QEPFYLLY | MVQRWLQ       | LVNLVVAGL                        | AI   | AIAGVAIGLRDKV |
| 34_1782  | RANGWLDPMRAKFAEKLDRS | QEPFYLLY | MVQRWLQ       | LVNLVVAGL                        | AI   | AIAGVAIGLRDKV |
| 35_10360 | RANGWLDPMRAKFAEKLDRS | QEPFYLLY | MVQRWLQ       | LVNLVVAGL                        | AI   | AIAGVAIGLRDKV |
| 36_468   | RANGWLDPMRAKFAEKLDRS | QEPFYLLY | MVQRWLQ       | LVNLVVAGL                        | AI   | AIAGVAIGLRDKV |
| 37_4956  | RANGWLDPMRAKFAEKLDRS | QEPFYLLY | MVQRWLQ       | LVNLVVAGL                        | AI   | AIAGVAIGLRDKV |
| 38_4305  | RANGWLDPMRAKFAEKLDRS | QEPFYLLY | MVQRWLQ       | LVNLVVAGL                        | AI   | AIAGVAIGLRDKV |
| 39_4737  | RANGWLDPMRAKFAEKLDRS | QEPFYLLY | MVQRWLQ       | LVNLVVAGL                        | AI   | AIAGVAIGLRDKV |
| 40_9543  | RANGWLDPMRAKFAEKLDRS | QEPFYLLY | MVQRWLQ       | LVNLVVAGL                        | AI   | AIAGVAIGLRDKV |
| 41_6669  | RANGWLDPMRAKFAEKLDRS | QEPFYLLY | MVQRWLQ       | LVNLVVAGL                        | AI   | AIAGVAIGLRDKV |
| 42_10558 | RANGWLDPMRAKFAEKLDRS | QEPFYLLY | MVQRWLQ       | LVNLVVAGL                        | AI   | AIAGVAIGLRDKV |
| 43_8051  | RANGWLDPMRAKFAEKLDRS | QEPFYLLY | MVQRWLQ       | LVNLVVAGL                        | AI   | AIAGVAIGLRDKV |
| 44_10454 | RANGWLDPMRAKFAEKLDRS | QEPFYLLY | MVQRWLQ       | LVNLVVAGL                        | AI   | AIAGVAIGLRDKV |
| 45_10126 | RANGWLDPMRAKFAEKLDRS | QEPFYLLY | MVQRWLQ       | LVNLVVAGL                        | AI   | AIAGVAIGLRDKV |
| 46_1547  | RANGWLDPMRAKFAEKLDRS | QEPFYLLY | MVQRWLQ       | LVNLVVAGL                        | AI   | AIAGVAIGLRDKV |
| 47_6749  | RANGWLDPMRAKFAEKLDRS | QEPFYLLY | MVQRWLQ       | LVNLVVAGL                        | AI   | AIAGVAIGLRDKV |
| 48_9982  | RANGWLDPMRAKFAEKLDRS | QEPFYLLY | MVQRWLQ       | LVNLVVAGL                        | AI   | AIAGVAIGLRDKV |
| 49_7293  | RANGWLDPMRAKFAEKLDRS | QEPFYLLY | MVQRWLQ       | LVNLVVAGL                        | AI   | AIAGVAIGLRDKV |
| 50_5993  | RANGWLDPMRAKFAEKLDRS | QEPFYLLY | MVQRWLQ       | LVNLVVAGL                        | AI   | AIAGVAIGLRDKV |
| 51_4791  | RANGWLDPMRAKFAEKLDRS | QEPFYLLY | MVQRWLQ       | LVNLVVAGL                        | AI   | AIAGVAIGLRDKV |
| 52_121   | RANGWLDPMRAKFAEKLDRS | QEPFYLLY | MVQRWLQ       | LVNLVVAGL                        | AI   | AIAGVAIGLRDKV |
| 53_1667  | RANGWLDPMRAKFAEKLDRS | QEPFYLLY | MVQRWLQ       | LVNLVVAGL                        | AI   | AIAGVAIGLRDKV |
| 54_10488 | RANGWLDPMRAKFAEKLDRS | QEPFYLLY | MVQRWLQ       | LVNLVVAGL                        | AI   | AIAGVAIGLRDKV |
| 55_7733  | RANGWLDPMRAKFAEKLDRS | QEPFYLLY | MVQRWLQ       | LVNLVVAGL                        | AI   | AIAGVAIGLRDKV |
| 56_3982  | RANGWLDPMRAKFAEKLDRS | QEPFYLLY | MVQRWLQ       | LVNLVVAGL                        | AI   | AIAGVAIGLRDKV |
| 57_392   | RANGWLDPMRAKFAEKLDRS | QEPFYLLY | MVQRWLQ       | LVNLVVAGL                        | AI   | AIAGVAIGLRDKV |
| 58_10291 | RANGWLDPMRAKFAEKLDRS | QEPFYLLY | MVQRWLQ       | LVNLVVAGL                        | AI   | AIAGVAIGLRDKV |
| 59_5792  | RANGWLDPMRAKFAEKLDRS | QEPFYLLY | MVQRWLQ       | LVNLVVAGL                        | AI   | AIAGVAIGLRDKV |
| 60_8712  | RANGWLDPMRAKFAEKLDRS | QEPFYLLY | MVQRWLQ       | LVNLVVAGL                        | AI   | AIAGVAIGLRDKV |
| 61_6716  | RANGWLDPMRAKFAEKLDRS | QEPFYLLY | MVQRWLQ       | LVNLVVAGL                        | AI   | AIAGVAIGLRDKV |
| 62_5599  | RANGWLDPMRAKFAEKLDRS | QEPFYLLY | MVQRWLQ       | LVNLVVAGL                        | AI   | AIAGVAIGLRDKV |
| 63_304   | RANGWLDPMRAKFAEKLDRS | QEPFYLLY | MVQRWLQ       | LVNLVVAGL                        | AI   | AIAGVAIGLRDKV |
| 64_10473 | .....                |          |               |                                  |      |               |
| 65_6310  | RANGWLDPMRAKFAEKLDRS | QEPFYLLY | MVQRWLQ       | LVNLVVAGL                        | AI   | AIAGVAIGLRDKV |
| 66_8714  | RANGWLDPMRAKFAEKLDRS | QEPFYLLY | MVQRWLQ       | LVNLVVAGL                        | AI   | AIAGVAIGLRDKV |
| 67_2350  | RANGWLDPMRAKFAEKLDRS | QEPFYLLY | MVQRWLQ       | LVNLVVAGL                        | AI   | AIAGVAIGLRDKV |
| 68_2447  | RANGWLDPMRAKFAEKLDRS | QEPFYLLY | MVQRWLQ       | LVNLVVAGL                        | AI   | AIAGVAIGLRDKV |
| 69_5658  | RANGWLDPMRAKFAEKLDRS | QEPFYLLY | MVQRWLQ       | LVNLVVAGL                        | AI   | AIAGVAIGLRDKV |
| 70_1277  | RANGWLDPMRAKFAEKLDRS | QEPFYLLY | MVQRWLQ       | LVNLVVAGL                        | AI   | AIAGVAIGLRDKV |
| 71_3717  | RANGWLDPMRAKFAEKLDRS | QEPFYLLY | MVQRWLQ       | LVNLVVAGL                        | AI   | AIAGVAIGLRDKV |
| 72_7846  | RANGWLDPMRAKFAEKLDRS | QEPFYLLY | MVQRWLQ       | LVNLVVAGL                        | AI   | AIAGVAIGLRDKV |
| 73_10528 | RANGWLDPMRAKFAEKLDRS | QEPFYLLY | MVQRWLQ       | LVNLVVAGL                        | AI   | AIAGVAIGLRDKV |
| 74_4899  | RANGWLDPMRAKFAEKLDRS | QEPFYLLY | MVQRWLQ       | LVNLVVAGL                        | AI   | AIAGVAIGLRDKV |
| 75_5507  | RANGWLDPMRAKFAEKLDRS | QEPFYLLY | MVQRWLQ       | LVNLVVAGL                        | AI   | AIAGVAIGLRDKV |
| 76_5432  | RANGWLDPMRAKFAEKLDRS | QEPFYLLY | MVQRWLQ       | LVNLVVAGL                        | AI   | AIAGVAIGLRDKV |
| 77_10770 | RANGWLDPMRAKFAEKLDRS | QEPFYLLY | MVQRWLQ       | LVNLVVAGL                        | AI   | AIAGVAIGLRDKV |
| 78_5904  | RANGWLDPMRAKFAEKLDRS | QEPFYLLY | MVQRWLQ       | LVNLVVAGL                        | AI   | AIAGVAIGLRDKV |
| 79_9653  | RANGWLDPMRAKFAEKLDRS | QEPFYLLY | MVQRWLQ       | LVNLVVAGL                        | AI   | AIAGVAIGLRDKV |
| 80_4462  | RANGWLDPMRAKFAEKLDRS | QEPFYLLY | MVQRWLQ       | LVNLVVAGL                        | AI   | AIAGVAIGLRDKV |
| 81_7194  | WLQVLNLVVAGL         | AI       | AIAGVAIGLRDKV | AAGAVGVALLNTTTLGETLTNFIMSWTSLETS |      |               |
| 82_1022  | RANGWLDPMRAKFAEKLDRS | QEPFYLLY | MVQRWLQ       | LVNLVVAGL                        | AI   | AIAGVAIGLRDKV |
| 83_9813  | RANGWLDPMRAKFAEKLDRS | QEPFYLLY | MVQRWLQ       | LVNLVVAGL                        | AI   | AIAGVAIGLRDKV |
| 84_1902  | RANGWLDPMRAKFAEKLDRS | QEPFYLLY | MVQRWLQ       | LVNLVVAGL                        | AI   | AIAGVAIGLRDKV |
| 85_5152  | RANGWLDPMRAKFAEKLDRS | QEPFYLLY | MVQRWLQ       | LVNLVVAGL                        | AI   | AIAGVAIGLRDKV |
| 86_3385  | RANGWLDPMRAKFAEKLDRS | QEPFYLLY | MVQRWLQ       | LVNLVVAGL                        | AI   | AIAGVAIGLRDKV |
| 87_10760 | RANGWLDPMRAKFAEKLDRS | QEPFYLLY | MVQRWLQ       | LVNLVVAGL                        | AI   | AIAGVAIGLRDKV |
| 88_1588  | RANGWLDPMRAKFAEKLDRS | QEPFYLLY | MVQRWLQ       | LVNLVVAGL                        | AI   | AIAGVAIGLRDKV |
| 89_1609  | RANGWLDPMRAKFAEKLDRS | QEPFYLLY | MVQRWLQ       | LVNLVVAGL                        | AI   | AIAGVAIGLRDKV |
| 90_4023  | RANGWLDPMRAKFAEKLDRS | QEPFYLLY | MVQRWLQ       | LVNLVVAGL                        | AI   | AIAGVAIGLRDKV |

|          | 1150   | 1160   | 1170   | 1180   | 1190  | 1200                             |
|----------|--------|--------|--------|--------|-------|----------------------------------|
| 1_4160   | AAGAVG | VALLNT | TTTLGE | TLTNFI | MSWTS | LETS                             |
| 2_6143   | AAGAVG | VALLNT | TTTLGE | TLTNFI | MSWTS | LETS                             |
| 3_6554   | AAGAVG | VALLNT | TTTLGE | TLTNFI | MSWTS | LETS                             |
| 4_111    | AAGAVG | VALLNT | TTTLGE | TLTNFI | MSWTS | LETS                             |
| 5_5742   | AAGAVG | VALLNT | TTTLGE | TLTNFI | MSWTS | LETS                             |
| 6_9490   | AAGAVG | VALLNT | TTTLGE | TLTNFI | MSWTS | LETS                             |
| 7_6313   | .....  |        |        |        |       |                                  |
| 8_2552   | AAGAVG | VALLNT | TTTLGE | TLTNFI | MSWTS | LETS                             |
| 9_7745   | AAGAVG | VALLNT | TTTLGE | TLTNFI | MSWTS | LETS                             |
| 10_2315  | AAGAVG | VALLNT | TTTLGE | TLTNFI | MSWTS | LETS                             |
| 11_2035  | AAGAVG | VALLNT | TTTLGE | TLTNFI | MSWTS | LETS                             |
| 12_9640  | AAGAVG | VALLNT | TTTLGE | TLTNFI | MSWTS | LETS                             |
| 13_3674  | AAGAVG | VALLNT | TTTLGE | TLTNFI | MSWTS | LETS                             |
| 14_6548  | AAGAVG | VALLNT | TTTLGE | TLTNFI | MSWTS | LETS                             |
| 15_10828 | AAGAVG | VALLNT | TTTLGE | TLTNFI | MSWTS | LETS                             |
| 16_6578  | AAGAVG | VALLNT | TTTLGE | TLTNFI | MSWTS | LETS                             |
| 17_10233 | AAGAVG | VALLNT | TTTLGE | TLTNFI | MSWTS | LETS                             |
| 18_9261  | AAGAVG | VALLNT | TTTLGE | TLTNFI | MSWTS | LETS                             |
| 19_8450  | AAGAVG | VALLNT | TTTLGE | TLTNFI | MSWTS | LETS                             |
| 20_1727  | AAGAVG | VALLNT | TTTLGE | TLTNFI | MSWTS | LETS                             |
| 21_206   | AAGAVG | VALLNT | TTTLGE | TLTNFI | MSWTS | LETS                             |
| 22_7439  | AAGAVG | VALLNT | TTTLGE | TLTNFI | MSWTS | LETS                             |
| 23_3780  | AAGAVG | VALLNT | TTTLGE | TLTNFI | MSWTS | LETS                             |
| 24_967   | AAGAVG | VALLNT | TTTLGE | TLTNFI | MSWTS | LETS                             |
| 25_6595  | AAGAVG | VALLNT | TTTLGE | TLTNFI | MSWTS | LETS                             |
| 26_8391  | AAGAVG | VALLNT | TTTLGE | TLTNFI | MSWTS | LETS                             |
| 27_8170  | AAGAVG | VALLNT | TTTLGE | TLTNFI | MSWTS | LETS                             |
| 28_5209  | AAGAVG | VALLNT | TTTLGE | TLTNFI | MSWTS | LETS                             |
| 29_2181  | AAGAVG | VALLNT | TTTLGE | TLTNFI | MSWTS | LETS                             |
| 30_8564  | AAGAVG | VALLNT | TTTLGE | TLTNFI | MSWTS | LETS                             |
| 31_1582  | AAGAVG | VALLNT | TTTLGE | TLTNFI | MSWTS | LETS                             |
| 32_4537  | AAGAVG | VALLNT | TTTLGE | TLTNFI | MSWTS | LETS                             |
| 33_9418  | AAGAVG | VALLNT | TTTLGE | TLTNFI | MSWTS | LETS                             |
| 34_1782  | AAGAVG | VALLNT | TTTLGE | TLTNFI | MSWTS | LETS                             |
| 35_10360 | AAGAVG | VALLNT | TTTLGE | TLTNFI | MSWTS | LETS                             |
| 36_468   | AAGAVG | VALLNT | TTTLGE | TLTNFI | MSWTS | LETS                             |
| 37_4956  | AAGAVG | VALLNT | TTTLGE | TLTNFI | MSWTS | LETS                             |
| 38_4305  | AAGAVG | VALLNT | TTTLGE | TLTNFI | MSWTS | LETS                             |
| 39_4737  | AAGAVG | VALLNT | TTTLGE | TLTNFI | MSWTS | LETS                             |
| 40_9543  | AAGAVG | VALLNT | TTTLGE | TLTNFI | MSWTS | LETS                             |
| 41_6669  | AAGAVG | VALLNT | TTTLGE | TLTNFI | MSWTS | LETS                             |
| 42_10558 | AAGAVG | VALLNT | TTTLGE | TLTNFI | MSWTS | LETS                             |
| 43_8051  | AAGAVG | VALLNT | TTTLGE | TLTNFI | MSWTS | LETS                             |
| 44_10454 | AAGAVG | VALLNT | TTTLGE | TLTNFI | MSWTS | LETS                             |
| 45_10126 | AAGAVG | VALLNT | TTTLGE | TLTNFI | MSWTS | LETS                             |
| 46_1547  | AAGAVG | VALLNT | TTTLGE | TLTNFI | MSWTS | LETS                             |
| 47_6749  | AAGAVG | VALLNT | TTTLGE | TLTNFI | MSWTS | LETS                             |
| 48_9982  | AAGAVG | VALLNT | TTTLGE | TLTNFI | MSWTS | LETS                             |
| 49_7293  | AAGAVG | VALLNT | TTTLGE | TLTNFI | MSWTS | LETS                             |
| 50_5993  | AAGAVG | VALLNT | TTTLGE | TLTNFI | MSWTS | LETS                             |
| 51_4791  | AAGAVG | VALLNT | TTTLGE | TLTNFI | MSWTS | LETS                             |
| 52_121   | AAGAVG | VALLNT | TTTLGE | TLTNFI | MSWTS | LETS                             |
| 53_1667  | AAGAVG | VALLNT | TTTLGE | TLTNFI | MSWTS | LETS                             |
| 54_10488 | AAGAVG | VALLNT | TTTLGE | TLTNFI | MSWTS | LETS                             |
| 55_7733  | AAGAVG | VALLNT | TTTLGE | TLTNFI | MSWTS | LETS                             |
| 56_3982  | AAGAVG | VALLNT | TTTLGE | TLTNFI | MSWTS | LETS                             |
| 57_392   | AAGAVG | VALLNT | TTTLGE | TLTNFI | MSWTS | LETS                             |
| 58_10291 | AAGAVG | VALLNT | TTTLGE | TLTNFI | MSWTS | LETS                             |
| 59_5792  | AAGAVG | VALLNT | TTTLGE | TLTNFI | MSWTS | LETS                             |
| 60_8712  | AAGAVG | VALLNT | TTTLGE | TLTNFI | MSWTS | LETS                             |
| 61_6716  | AAGAVG | VALLNT | TTTLGE | TLTNFI | MSWTS | LETS                             |
| 62_5599  | AAGAVG | VALLNT | TTTLGE | TLTNFI | MSWTS | LETS                             |
| 63_304   | AAGAVG | VALLNT | TTTLGE | TLTNFI | MSWTS | LETS                             |
| 64_10473 | .....  |        |        |        |       |                                  |
| 65_6310  | AAGAVG | VALLNT | TTTLGE | TLTNFI | MSWTS | LETS                             |
| 66_8714  | AAGAVG | VALLNT | TTTLGE | TLTNFI | MSWTS | LETS                             |
| 67_2350  | AAGAVG | VALLNT | TTTLGE | TLTNFI | MSWTS | LETS                             |
| 68_2447  | AAGAVG | VALLNT | TTTLGE | TLTNFI | MSWTS | LETS                             |
| 69_5658  | AAGAVG | VALLNT | TTTLGE | TLTNFI | MSWTS | LETS                             |
| 70_1277  | AAGAVG | VALLNT | TTTLGE | TLTNFI | MSWTS | LETS                             |
| 71_3717  | AAGAVG | VALLNT | TTTLGE | TLTNFI | MSWTS | LETS                             |
| 72_7846  | AAGAVG | VALLNT | TTTLGE | TLTNFI | MSWTS | LETS                             |
| 73_10528 | AAGAVG | VALLNT | TTTLGE | TLTNFI | MSWTS | LETS                             |
| 74_4899  | AAGAVG | VALLNT | TTTLGE | TLTNFI | MSWTS | LETS                             |
| 75_5507  | AAGAVG | VALLNT | TTTLGE | TLTNFI | MSWTS | LETS                             |
| 76_5432  | AAGAVG | VALLNT | TTTLGE | TLTNFI | MSWTS | LETS                             |
| 77_10770 | AAGAVG | VALLNT | TTTLGE | TLTNFI | MSWTS | LETS                             |
| 78_5904  | AAGAVG | VALLNT | TTTLGE | TLTNFI | MSWTS | LETS                             |
| 79_9653  | AAGAVG | VALLNT | TTTLGE | TLTNFI | MSWTS | LETS                             |
| 80_4462  | AAGAVG | VALLNT | TTTLGE | TLTNFI | MSWTS | LETS                             |
| 81_7194  | LGAIAR | VCTFEQ | DTPRER | EEPST  | TDLPD | NRPGAGQISFENVWATYEDEGCGSNWGLSGIT |
| 82_1022  | AAGAVG | VALLNT | TTTLGE | TLTNFI | MSWTS | LETS                             |
| 83_9813  | AAGAVG | VALLNT | TTTLGE | TLTNFI | MSWTS | LETS                             |
| 84_1902  | AAGAVG | VALLNT | TTTLGE | TLTNFI | MSWTS | LETS                             |
| 85_5152  | AAGAVG | VALLNT | TTTLGE | TLTNFI | MSWTS | LETS                             |
| 86_3385  | AAGAVG | VALLNT | TTTLGE | TLTNFI | MSWTS | LETS                             |
| 87_10760 | AAGAVG | VALLNT | TTTLGE | TLTNFI | MSWTS | LETS                             |
| 88_1588  | AAGAVG | VALLNT | TTTLGE | TLTNFI | MSWTS | LETS                             |
| 89_1609  | AAGAVG | VALLNT | TTTLGE | TLTNFI | MSWTS | LETS                             |
| 90_4023  | AAGAVG | VALLNT | TTTLGE | TLTNFI | MSWTS | LETS                             |

|          | 1210              | 1220            | 1230             | 1240             | 1250 | 1260 |
|----------|-------------------|-----------------|------------------|------------------|------|------|
| 1_4160   | NRPGAGQISFENVWATY | EDEGCGSNWGLSGIT | TLAVQPGERVAVCGRT | TGSGKSTLLLLALLG  |      |      |
| 2_6143   | NRPGAGQISFENVWATY | EDEGCGSNWGLSGIT | TLAVQPGERVAVCGRT | TGSGKSTLLLLALLG  |      |      |
| 3_6554   | NRPGAGQISFENVWATY | EDEGCGSNWGLSGIT | TLAVQPGERVAVCGRT | TGSGKSTLLLLALLG  |      |      |
| 4_111    | NRPGAGQISFENVWATY | EDEGCGSNWGLSGIT | TLAVQPGERVAVCGRT | TGSGKSTLLLLALLG  |      |      |
| 5_5742   | NRPGAGQISFENVWATY | EDEGCGSNWGLSGIT | TLAVQPGERVAVCGRT | TGSGKSTLLLLALLG  |      |      |
| 6_9490   | NRPGAGQISFENVWATY | EDEGCGSNWGLSGIT | TLAVQPGERVAVCGRT | TGSGKSTLLLLALLG  |      |      |
| 7_6313   | .....             |                 |                  |                  |      |      |
| 8_2552   | NRPGAGQISFENVWATY | EDEGCGSNWGLSGIT | TLAVQPGERVAVCGRT | TGSGKSTLLLLALLG  |      |      |
| 9_7745   | NRPGAGQISFENVWATY | EDEGCGSNWGLSGIT | TLAVQPGERVAVCGRT | TGSGKSTLLLLALLG  |      |      |
| 10_2315  | NRPGAGQISFENVWATY | EDEGCGSNWGLSGIT | TLAVQPGERVAVCGRT | TGSGKSTLLLLALLG  |      |      |
| 11_2035  | NRPGAGQISFENVWATY | EDEGCGSNWGLSGIT | TLAVQPGERVAVCGRT | TGSGKSTLLLLALLG  |      |      |
| 12_9640  | NRPGAGQISFENVWATY | EDEGCGSNWGLSGIT | TLAVQPGERVAVCGRT | TGSGKSTLLLLALLG  |      |      |
| 13_3674  | NRPGAGQISFENVWATY | EDEGCGSNWGLSGIT | TLAVQPGERVAVCGRT | TGSGKSTLLLLALLG  |      |      |
| 14_6548  | NRPGAGQISFENVWATY | EDEGCGSNWGLSGIT | TLAVQPGERVAVCGRT | TGSGKSTLLLLALLG  |      |      |
| 15_10828 | NRPGAGQISFENVWATY | EDEGCGSNWGLSGIT | TLAVQPGERVAVCGRT | TGSGKSTLLLLALLG  |      |      |
| 16_6578  | NRPGAGQISFENVWATY | EDEGCGSNWGLSGIT | TLAVQPGERVAVCGRT | TGSGKSTLLLLALLG  |      |      |
| 17_10233 | NRPGAGQISFENVWATY | EDEGCGSNWGLSGIT | TLAVQPGERVAVCGRT | TGSGKSTLLLLALLG  |      |      |
| 18_9261  | NRPGAGQISFENVWATY | EDEGCGSNWGLSGIT | TLAVQPGERVAVCGRT | TGSGKSTLLLLALLG  |      |      |
| 19_8450  | NRPGAGQISFENVWATY | EDEGCGSNWGLSGIT | TLAVQPGERVAVCGRT | TGSGKSTLLLLALLG  |      |      |
| 20_1727  | NRPGAGQISFENVWATY | EDEGCGSNWGLSGIT | TLAVQPGERVAVCGRT | TGSGKSTLLLLALLG  |      |      |
| 21_206   | NRPGAGQISFENVWATY | EDEGCGSNWGLSGIT | TLAVQPGERVAVCGRT | TGSGKSTLLLLALLG  |      |      |
| 22_7439  | NRPGAGQISFENVWATY | EDEGCGSNWGLSGIT | TLAVQPGERVAVCGRT | TGSGKSTLLLLALLG  |      |      |
| 23_3780  | NRPGAGQISFENVWATY | EDEGCGSNWGLSGIT | TLAVQPGERVAVCGRT | TGSGKSTLLLLALLG  |      |      |
| 24_967   | NRPGAGQISFENVWATY | EDEGCGSNWGLSGIT | TLAVQPGERVAVCGRT | TGSGKSTLLLLALLG  |      |      |
| 25_6595  | NRPGAGQISFENVWATY | EDEGCGSNWGLSGIT | TLAVQPGERVAVCGRT | TGSGKSTLLLLALLG  |      |      |
| 26_8391  | NRPGAGQISFENVWATY | EDEGCGSNWGLSGIT | TLAVQPGERVAVCGRT | TGSGKSTLLLLALLG  |      |      |
| 27_8170  | NRPGAGQISFENVWATY | EDEGCGSNWGLSGIT | TLAVQPGERVAVCGRT | TGSGKSTLLLLALLG  |      |      |
| 28_5209  | NRPGAGQISFENVWATY | EDEGCGSNWGLSGIT | TLAVQPGERVAVCGRT | TGSGKSTLLLLALLG  |      |      |
| 29_2181  | NRPGAGQISFENVWATY | EDEGCGSNWGLSGIT | TLAVQPGERVAVCGRT | TGSGKSTLLLLALLG  |      |      |
| 30_8564  | NRPGAGQISFENVWATY | EDEGCGSNWGLSGIT | TLAVQPGERVAVCGRT | TGSGKSTLLLLALLG  |      |      |
| 31_1582  | NRPGAGQISFENVWATY | EDEGCGSNWGLSGIT | TLAVQPGERVAVCGRT | TGSGKSTLLLLALLG  |      |      |
| 32_4537  | NRPGAGQISFENVWATY | EDEGCGSNWGLSGIT | TLAVQPGERVAVCGRT | TGSGKSTLLLLALLG  |      |      |
| 33_9418  | NRPGAGQISFENVWATY | EDEGCGSNWGLSGIT | TLAVQPGERVAVCGRT | TGSGKSTLLLLALLG  |      |      |
| 34_1782  | NRPGAGQISFENVWATY | EDEGCGSNWGLSGIT | TLAVQPGERVAVCGRT | TGSGKSTLLLLALLG  |      |      |
| 35_10360 | NRPGAGQISFENVWATY | EDEGCGSNWGLSGIT | TLAVQPGERVAVCGRT | TGSGKSTLLLLALLG  |      |      |
| 36_468   | NRPGAGQISFENVWATY | EDEGCGSNWGLSGIT | TLAVQPGERVAVCGRT | TGSGKSTLLLLALLG  |      |      |
| 37_4956  | NRPGAGQISFENVWATY | EDEGCGSNWGLSGIT | TLAVQPGERVAVCGRT | TGSGKSTLLLLALLG  |      |      |
| 38_4305  | NRPGAGQISFENVWATY | EDEGCGSNWGLSGIT | TLAVQPGERVAVCGRT | TGSGKSTLLLLALLG  |      |      |
| 39_4737  | NRPGAGQISFENVWATY | EDEGCGSNWGLSGIT | TLAVQPGERVAVCGRT | TGSGKSTLLLLALLG  |      |      |
| 40_9543  | NRPGAGQISFENVWATY | EDEGCGSNWGLSGIT | TLAVQPGERVAVCGRT | TGSGKSTLLLLALLG  |      |      |
| 41_6669  | NRPGAGQISFENVWATY | EDEGCGSNWGLSGIT | TLAVQPGERVAVCGRT | TGSGKSTLLLLALLG  |      |      |
| 42_10558 | NRPGAGQISFENVWATY | EDEGCGSNWGLSGIT | TLAVQPGERVAVCGRT | TGSGKSTLLLLALLG  |      |      |
| 43_8051  | NRPGAGQISFENVWATY | EDEGCGSNWGLSGIT | TLAVQPGERVAVCGRT | TGSGKSTLLLLALLG  |      |      |
| 44_10454 | NRPGAGQISFENVWATY | EDEGCGSNWGLSGIT | TLAVQPGERVAVCGRT | TGSGKSTLLLLALLG  |      |      |
| 45_10126 | NRPGAGQISFENVWATY | EDEGCGSNWGLSGIT | TLAVQPGERVAVCGRT | TGSGKSTLLLLALLG  |      |      |
| 46_1547  | NRPGAGQISFENVWATY | EDEGCGSNWGLSGIT | TLAVQPGERVAVCGRT | TGSGKSTLLLLALLG  |      |      |
| 47_6749  | NRPGAGQISFENVWATY | EDEGCGSNWGLSGIT | TLAVQPGERVAVCGRT | TGSGKSTLLLLALLG  |      |      |
| 48_9982  | NRPGAGQISFENVWATY | EDEGCGSNWGLSGIT | TLAVQPGERVAVCGRT | TGSGKSTLLLLALLG  |      |      |
| 49_7293  | NRPGAGQISFENVWATY | EDEGCGSNWGLSGIT | TLAVQPGERVAVCGRT | TGSGKSTLLLLALLG  |      |      |
| 50_5993  | NRPGAGQISFENVWATY | EDEGCGSNWGLSGIT | TLAVQPGERVAVCGRT | TGSGKSTLLLLALLG  |      |      |
| 51_4791  | NRPGAGQISFENVWATY | EDEGCGSNWGLSGIT | TLAVQPGERVAVCGRT | TGSGKSTLLLLALLG  |      |      |
| 52_121   | NRPGAGQISFENVWATY | EDEGCGSNWGLSGIT | TLAVQPGERVAVCGRT | TGSGKSTLLLLALLG  |      |      |
| 53_1667  | NRPGAGQISFENVWATY | EDEGCGSNWGLSGIT | TLAVQPGERVAVCGRT | TGSGKSTLLLLALLG  |      |      |
| 54_10488 | NRPGAGQISFENVWATY | EDEGCGSNWGLSGIT | TLAVQPGERVAVCGRT | TGSGKSTLLLLALLG  |      |      |
| 55_7733  | NRPGAGQISFENVWATY | EDEGCGSNWGLSGIT | TLAVQPGERVAVCGRT | TGSGKSTLLLLALLG  |      |      |
| 56_3982  | NRPGAGQISFENVWATY | EDEGCGSNWGLSGIT | TLAVQPGERVAVCGRT | TGSGKSTLLLLALLG  |      |      |
| 57_392   | NRPGAGQISFENVWATY | EDEGCGSNWGLSGIT | TLAVQPGERVAVCGRT | TGSGKSTLLLLALLG  |      |      |
| 58_10291 | NRPGAGQISFENVWATY | EDEGCGSNWGLSGIT | TLAVQPGERVAVCGRT | TGSGKSTLLLLALLG  |      |      |
| 59_5792  | NRPGAGQISFENVWATY | EDEGCGSNWGLSGIT | TLAVQPGERVAVCGRT | TGSGKSTLLLLALLG  |      |      |
| 60_8712  | NRPGAGQISFENVWATY | EDEGCGSNWGLSGIT | TLAVQPGERVAVCGRT | TGSGKSTLLLLALLG  |      |      |
| 61_6716  | NRPGAGQISFENVWATY | EDEGCGSNWGLSGIT | TLAVQPGERVAVCGRT | TGSGKSTLLLLALLG  |      |      |
| 62_5599  | NRPGAGQISFENVWATY | EDEGCGSNWGLSGIT | TLAVQPGERVAVCGRT | TGSGKSTLLLLALLG  |      |      |
| 63_304   | NRPGAGQISFENVWATY | EDEGCGSNWGLSGIT | TLAVQPGERVAVCGRT | TGSGKSTLLLLALLG  |      |      |
| 64_10473 | .....             |                 |                  |                  |      |      |
| 65_6310  | NRPGAGQISFENVWATY | EDEGCGSNWGLSGIT | TLAVQPGERVAVCGRT | TGSGKSTLLLLALLG  |      |      |
| 66_8714  | NRPGAGQISFENVWATY | EDEGCGSNWGLSGIT | TLAVQPGERVAVCGRT | TGSGKSTLLLLALLG  |      |      |
| 67_2350  | NRPGAGQISFENVWATY | EDEGCGSNWGLSGIT | TLAVQPGERVAVCGRT | TGSGKSTLLLLALLG  |      |      |
| 68_2447  | NRPGAGQISFENVWATY | EDEGCGSNWGLSGIT | TLAVQPGERVAVCGRT | TGSGKSTLLLLALLG  |      |      |
| 69_5658  | NRPGAGQISFENVWATY | EDEGCGSNWGLSGIT | TLAVQPGERVAVCGRT | TGSGKSTLLLLALLG  |      |      |
| 70_1277  | NRPGAGQISFENVWATY | EDEGCGSNWGLSGIT | TLAVQPGERVAVCGRT | TGSGKSTLLLLALLG  |      |      |
| 71_3717  | NRPGAGQISFENVWATY | EDEGCGSNWGLSGIT | TLAVQPGERVAVCGRT | TGSGKSTLLLLALLG  |      |      |
| 72_7846  | NRPGAGQISFENVWATY | EDEGCGSNWGLSGIT | TLAVQPGERVAVCGRT | TGSGKSTLLLLALLG  |      |      |
| 73_10528 | NRPGAGQISFENVWATY | EDEGCGSNWGLSGIT | TLAVQPGERVAVCGRT | TGSGKSTLLLLALLG  |      |      |
| 74_4899  | NRPGAGQISFENVWATY | EDEGCGSNWGLSGIT | TLAVQPGERVAVCGRT | TGSGKSTLLLLALLG  |      |      |
| 75_5507  | NRPGAGQISFENVWATY | EDEGCGSNWGLSGIT | TLAVQPGERVAVCGRT | TGSGKSTLLLLALLG  |      |      |
| 76_5432  | NRPGAGQISFENVWATY | EDEGCGSNWGLSGIT | TLAVQPGERVAVCGRT | TGSGKSTLLLLALLG  |      |      |
| 77_10770 | NRPGAGQISFENVWATY | EDEGCGSNWGLSGIT | TLAVQPGERVAVCGRT | TGSGKSTLLLLALLG  |      |      |
| 78_5904  | NRPGAGQISFENVWATY | EDEGCGSNWGLSGIT | TLAVQPGERVAVCGRT | TGSGKSTLLLLALLG  |      |      |
| 79_9653  | NRPGAGQISFENVWATY | EDEGCGSNWGLSGIT | TLAVQPGERVAVCGRT | TGSGKSTLLLLALLG  |      |      |
| 80_4462  | NRPGAGQISFENVWATY | EDEGCGSNWGLSGIT | TLAVQPGERVAVCGRT | TGSGKSTLLLLALLG  |      |      |
| 81_7194  | LAVQPGERVAVCGRT   | TGSGKSTLLLLALLG | MLHTPAGSIRIDGVD  | STLPIDVLRRRFTVVS |      |      |
| 82_1022  | NRPGAGQISFENVWATY | EDEGCGSNWGLSGIT | TLAVQPGERVAVCGRT | TGSGKSTLLLLALLG  |      |      |
| 83_9813  | NRPGAGQISFENVWATY | EDEGCGSNWGLSGIT | TLAVQPGERVAVCGRT | TGSGKSTLLLLALLG  |      |      |
| 84_1902  | NRPGAGQISFENVWATY | EDEGCGSNWGLSGIT | TLAVQPGERVAVCGRT | TGSGKSTLLLLALLG  |      |      |
| 85_5152  | NRPGAGQISFENVWATY | EDEGCGSNWGLSGIT | TLAVQPGERVAVCGRT | TGSGKSTLLLLALLG  |      |      |
| 86_3385  | NRPGAGQISFENVWATY | EDEGCGSNWGLSGIT | TLAVQPGERVAVCGRT | TGSGKSTLLLLALLG  |      |      |
| 87_10760 | NRPGAGQISFENVWATY | EDEGCGSNWGLSGIT | TLAVQPGERVAVCGRT | TGSGKSTLLLLALLG  |      |      |
| 88_1588  | NRPGAGQISFENVWATY | EDEGCGSNWGLSGIT | TLAVQPGERVAVCGRT | TGSGKSTLLLLALLG  |      |      |
| 89_1609  | NRPGAGQISFENVWATY | EDEGCGSNWGLSGIT | TLAVQPGERVAVCGRT | TGSGKSTLLLLALLG  |      |      |
| 90_4023  | NRPGAGQISFENVWATY | EDEGCGSNWGLSGIT | TLAVQPGERVAVCGRT | TGSGKSTLLLLALLG  |      |      |

|          | 1270     | 1280     | 1290   | 1300    | 1310  | 1320   |
|----------|----------|----------|--------|---------|-------|--------|
| 1_4160   | MLHTPAGS | IRIDGVD  | TSTLP  | IDVLR   | RRFTV | VVSQDS |
| 2_6143   | MLHTPAGS | IRIDGVD  | TSTLP  | IDVLR   | RRFTV | VVSQDS |
| 3_6554   | MLHTPAGS | IRIDGVD  | TSTLP  | IDVLR   | RRFTV | VVSQDS |
| 4_111    | MLHTPAGS | IRIDGVD  | TSTLP  | IDVLR   | RRFTV | VVSQDS |
| 5_5742   | MLHTPAGS | IRIDGVD  | TSTLP  | IDVLR   | RRFTV | VVSQDS |
| 6_9490   | MLHTPAGS | IRIDGVD  | TSTLP  | IDVLR   | RRFTV | VVSQDS |
| 7_6313   | .....    |          |        |         |       |        |
| 8_2552   | MLHTPAGS | IRIDGVD  | TSTLP  | IDVLR   | RRFTV | VVSQDS |
| 9_7745   | MLHTPAGS | IRIDGVD  | TSTLP  | IDVLR   | RRFTV | VVSQDS |
| 10_2315  | MLHTPAGS | IRIDGVD  | TSTLP  | IDVLR   | RRFTV | VVSQDS |
| 11_2035  | MLHTPAGS | IRIDGVD  | TSTLP  | IDVLR   | RRFTV | VVSQDS |
| 12_9640  | MLHTPAGS | IRIDGVD  | TSTLP  | IDVLR   | RRFTV | VVSQDS |
| 13_3674  | MLHTPAGS | IRIDGVD  | TSTLP  | IDVLR   | RRFTV | VVSQDS |
| 14_6548  | MLHTPAGS | IRIDGVD  | TSTLP  | IDVLR   | RRFTV | VVSQDS |
| 15_10828 | MLHTPAGS | IRIDGVD  | TSTLP  | IDVLR   | RRFTV | VVSQDS |
| 16_6578  | MLHTPAGS | IRIDGVD  | TSTLP  | IDVLR   | RRFTV | VVSQDS |
| 17_10233 | MLHTPAGS | IRIDGVD  | TSTLP  | IDVLR   | RRFTV | VVSQDS |
| 18_9261  | MLHTPAGS | IRIDGVD  | TSTLP  | IDVLR   | RRFTV | VVSQDS |
| 19_8450  | MLHTPAGS | IRIDGVD  | TSTLP  | IDVLR   | RRFTV | VVSQDS |
| 20_1727  | MLHTPAGS | IRIDGVD  | TSTLP  | IDVLR   | RRFTV | VVSQDS |
| 21_206   | MLHTPAGS | IRIDGVD  | TSTLP  | IDVLR   | RRFTV | VVSQDS |
| 22_7439  | MLHTPAGS | IRIDGVD  | TSTLP  | IDVLR   | RRFTV | VVSQDS |
| 23_3780  | MLHTPAGS | IRIDGVD  | TSTLP  | IDVLR   | RRFTV | VVSQDS |
| 24_967   | MLHTPAGS | IRIDGVD  | TSTLP  | IDVLR   | RRFTV | VVSQDS |
| 25_6595  | MLHTPAGS | IRIDGVD  | TSTLP  | IDVLR   | RRFTV | VVSQDS |
| 26_8391  | MLHTPAGS | IRIDGVD  | TSTLP  | IDVLR   | RRFTV | VVSQDS |
| 27_8170  | MLHTPAGS | IRIDGVD  | TSTLP  | IDVLR   | RRFTV | VVSQDS |
| 28_5209  | MLHTPAGS | IRIDGVD  | TSTLP  | IDVLR   | RRFTV | VVSQDS |
| 29_2181  | MLHTPAGS | IRIDGVD  | TSTLP  | IDVLR   | RRFTV | VVSQDS |
| 30_8564  | MLHTPAGS | IRIDGVD  | TSTLP  | IDVLR   | RRFTV | VVSQDS |
| 31_1582  | MLHTPAGS | IRIDGVD  | TSTLP  | IDVLR   | RRFTV | VVSQDS |
| 32_4537  | MLHTPAGS | IRIDGVD  | TSTLP  | IDVLR   | RRFTV | VVSQDS |
| 33_9418  | MLHTPAGS | IRIDGVD  | TSTLP  | IDVLR   | RRFTV | VVSQDS |
| 34_1782  | MLHTPAGS | IRIDGVD  | TSTLP  | IDVLR   | RRFTV | VVSQDS |
| 35_10360 | MLHTPAGS | IRIDGVD  | TSTLP  | IDVLR   | RRFTV | VVSQDS |
| 36_468   | MLHTPAGS | IRIDGVD  | TSTLP  | IDVLR   | RRFTV | VVSQDS |
| 37_4956  | MLHTPAGS | IRIDGVD  | TSTLP  | IDVLR   | RRFTV | VVSQDS |
| 38_4305  | MLHTPAGS | IRIDGVD  | TSTLP  | IDVLR   | RRFTV | VVSQDS |
| 39_4737  | MLHTPAGS | IRIDGVD  | TSTLP  | IDVLR   | RRFTV | VVSQDS |
| 40_9543  | MLHTPAGS | IRIDGVD  | TSTLP  | IDVLR   | RRFTV | VVSQDS |
| 41_6669  | MLHTPAGS | IRIDGVD  | TSTLP  | IDVLR   | RRFTV | VVSQDS |
| 42_10558 | MLHTPAGS | IRIDGVD  | TSTLP  | IDVLR   | RRFTV | VVSQDS |
| 43_8051  | MLHTPAGS | IRIDGVD  | TSTLP  | IDVLR   | RRFTV | VVSQDS |
| 44_10454 | MLHTPAGS | IRIDGVD  | TSTLP  | IDVLR   | RRFTV | VVSQDS |
| 45_10126 | MLHTPAGS | IRIDGVD  | TSTLP  | IDVLR   | RRFTV | VVSQDS |
| 46_1547  | MLHTPAGS | IRIDGVD  | TSTLP  | IDVLR   | RRFTV | VVSQDS |
| 47_6749  | MLHTPAGS | IRIDGVD  | TSTLP  | IDVLR   | RRFTV | VVSQDS |
| 48_9982  | MLHTPAGS | IRIDGVD  | TSTLP  | IDVLR   | RRFTV | VVSQDS |
| 49_7293  | MLHTPAGS | IRIDGVD  | TSTLP  | IDVLR   | RRFTV | VVSQDS |
| 50_5993  | MLHTPAGS | IRIDGVD  | TSTLP  | IDVLR   | RRFTV | VVSQDS |
| 51_4791  | MLHTPAGS | IRIDGVD  | TSTLP  | IDVLR   | RRFTV | VVSQDS |
| 52_121   | MLHTPAGS | IRIDGVD  | TSTLP  | IDVLR   | RRFTV | VVSQDS |
| 53_1667  | MLHTPAGS | IRIDGVD  | TSTLP  | IDVLR   | RRFTV | VVSQDS |
| 54_10488 | MLHTPAGS | IRIDGVD  | TSTLP  | IDVLR   | RRFTV | VVSQDS |
| 55_7733  | MLHTPAGS | IRIDGVD  | TSTLP  | IDVLR   | RRFTV | VVSQDS |
| 56_3982  | MLHTPAGS | IRIDGVD  | TSTLP  | IDVLR   | RRFTV | VVSQDS |
| 57_392   | MLHTPAGS | IRIDGVD  | TSTLP  | IDVLR   | RRFTV | VVSQDS |
| 58_10291 | MLHTPAGS | IRIDGVD  | TSTLP  | IDVLR   | RRFTV | VVSQDS |
| 59_5792  | MLHTPAGS | IRIDGVD  | TSTLP  | IDVLR   | RRFTV | VVSQDS |
| 60_8712  | MLHTPAGS | IRIDGVD  | TSTLP  | IDVLR   | RRFTV | VVSQDS |
| 61_6716  | MLHTPAGS | IRIDGVD  | TSTLP  | IDVLR   | RRFTV | VVSQDS |
| 62_5599  | MLHTPAGS | IRIDGVD  | TSTLP  | IDVLR   | RRFTV | VVSQDS |
| 63_304   | MLHTPAGS | IRIDGVD  | TSTLP  | IDVLR   | RRFTV | VVSQDS |
| 64_10473 | .....    |          |        |         |       |        |
| 65_6310  | MLHTPAGS | IRIDGVD  | TSTLP  | IDVLR   | RRFTV | VVSQDS |
| 66_8714  | MLHTPAGS | IRIDGVD  | TSTLP  | IDVLR   | RRFTV | VVSQDS |
| 67_2350  | MLHTPAGS | IRIDGVD  | TSTLP  | IDVLR   | RRFTV | VVSQDS |
| 68_2447  | MLHTPAGS | IRIDGVD  | TSTLP  | IDVLR   | RRFTV | VVSQDS |
| 69_5658  | MLHTPAGS | IRIDGVD  | TSTLP  | IDVLR   | RRFTV | VVSQDS |
| 70_1277  | MLHTPAGS | IRIDGVD  | TSTLP  | IDVLR   | RRFTV | VVSQDS |
| 71_3717  | MLHTPAGS | IRIDGVD  | TSTLP  | IDVLR   | RRFTV | VVSQDS |
| 72_7846  | MLHTPAGS | IRIDGVD  | TSTLP  | IDVLR   | RRFTV | VVSQDS |
| 73_10528 | MLHTPAGS | IRIDGVD  | TSTLP  | IDVLR   | RRFTV | VVSQDS |
| 74_4899  | MLHTPAGS | IRIDGVD  | TSTLP  | IDVLR   | RRFTV | VVSQDS |
| 75_5507  | MLHTPAGS | IRIDGVD  | TSTLP  | IDVLR   | RRFTV | VVSQDS |
| 76_5432  | MLHTPAGS | IRIDGVD  | TSTLP  | IDVLR   | RRFTV | VVSQDS |
| 77_10770 | MLHTPAGS | IRIDGVD  | TSTLP  | IDVLR   | RRFTV | VVSQDS |
| 78_5904  | MLHTPAGS | IRIDGVD  | TSTLP  | IDVLR   | RRFTV | VVSQDS |
| 79_9653  | MLHTPAGS | IRIDGVD  | TSTLP  | IDVLR   | RRFTV | VVSQDS |
| 80_4462  | MLHTPAGS | IRIDGVD  | TSTLP  | IDVLR   | RRFTV | VVSQDS |
| 81_7194  | QDSFFEPT | TSTFRQEL | DPSGDM | SDQIIIE | EVLR  | ECRAW  |
| 82_1022  | MLHTPAGS | IRIDGVD  | TSTLP  | IDVLR   | RRFTV | VVSQDS |
| 83_9813  | MLHTPAGS | IRIDGVD  | TSTLP  | IDVLR   | RRFTV | VVSQDS |
| 84_1902  | MLHTPAGS | IRIDGVD  | TSTLP  | IDVLR   | RRFTV | VVSQDS |
| 85_5152  | MLHTPAGS | IRIDGVD  | TSTLP  | IDVLR   | RRFTV | VVSQDS |
| 86_3385  | MLHTPAGS | IRIDGVD  | TSTLP  | IDVLR   | RRFTV | VVSQDS |
| 87_10760 | MLHTPAGS | IRIDGVD  | TSTLP  | IDVLR   | RRFTV | VVSQDS |
| 88_1588  | MLHTPAGS | IRIDGVD  | TSTLP  | IDVLR   | RRFTV | VVSQDS |
| 89_1609  | MLHTPAGS | IRIDGVD  | TSTLP  | IDVLR   | RRFTV | VVSQDS |
| 90_4023  | MLHTPAGS | IRIDGVD  | TSTLP  | IDVLR   | RRFTV | VVSQDS |

|          | 1330   | 1340 | 1350  | 1360  | 1370 | 1380  |
|----------|--------|------|-------|-------|------|-------|
| 1_4160   | VLRECR | AI   | IVDGS | GGGLG | GKRA | DANLS |
| 2_6143   | VLRECR | AI   | IVDGS | GGGLG | GKRA | DANLS |
| 3_6554   | VLRECR | AI   | IVDGS | GGGLG | GKRA | DANLS |
| 4_111    | VLRECR | AI   | IVDGS | GGGLG | GKRA | DANLS |
| 5_5742   | VLRECR | AI   | IVDGS | GGGLG | GKRA | DANLS |
| 6_9490   | VLRECR | AI   | IVDGS | GGGLG | GKRA | DANLS |
| 7_6313   | VLRECR | AI   | IVDGS | GGGLG | GKRA | DANLS |
| 8_2552   | VLRECR | AI   | IVDGS | GGGLG | GKRA | DANLS |
| 9_7745   | VLRECR | AI   | IVDGS | GGGLG | GKRA | DANLS |
| 10_2315  | VLRECR | AI   | IVDGS | GGGLG | GKRA | DANLS |
| 11_2035  | VLRECR | AI   | IVDGS | GGGLG | GKRA | DANLS |
| 12_9640  | VLRECR | AI   | IVDGS | GGGLG | GKRA | DANLS |
| 13_3674  | VLRECR | AI   | IVDGS | GGGLG | GKRA | DANLS |
| 14_6548  | VLRECR | AI   | IVDGS | GGGLG | GKRA | DANLS |
| 15_10828 | VLRECR | AI   | IVDGS | GGGLG | GKRA | DANLS |
| 16_6578  | VLRECR | AI   | IVDGS | GGGLG | GKRA | DANLS |
| 17_10233 | VLRECR | AI   | IVDGS | GGGLG | GKRA | DANLS |
| 18_9261  | VLRECR | AI   | IVDGS | GGGLG | GKRA | DANLS |
| 19_8450  | VLRECR | AI   | IVDGS | GGGLG | GKRA | DANLS |
| 20_1727  | VLRECR | AI   | IVDGS | GGGLG | GKRA | DANLS |
| 21_206   | VLRECR | AI   | IVDGS | GGGLG | GKRA | DANLS |
| 22_7439  | VLRECR | AI   | IVDGS | GGGLG | GKRA | DANLS |
| 23_3780  | VLRECR | AI   | IVDGS | GGGLG | GKRA | DANLS |
| 24_967   | VLRECR | AI   | IVDGS | GGGLG | GKRA | DANLS |
| 25_6595  | VLRECR | AI   | IVDGS | GGGLG | GKRA | DANLS |
| 26_8391  | VLRECR | AI   | IVDGS | GGGLG | GKRA | DANLS |
| 27_8170  | VLRECR | AI   | IVDGS | GGGLG | GKRA | DANLS |
| 28_5209  | VLRECR | AI   | IVDGS | GGGLG | GKRA | DANLS |
| 29_2181  | VLRECR | AI   | IVDGS | GGGLG | GKRA | DANLS |
| 30_8564  | VLRECR | AI   | IVDGS | GGGLG | GKRA | DANLS |
| 31_1582  | VLRECR | AI   | IVDGS | GGGLG | GKRA | DANLS |
| 32_4537  | VLRECR | AI   | IVDGS | GGGLG | GKRA | DANLS |
| 33_9418  | VLRECR | AI   | IVDGS | GGGLG | GKRA | DANLS |
| 34_1782  | VLRECR | AI   | IVDGS | GGGLG | GKRA | DANLS |
| 35_10360 | VLRECR | AI   | IVDGS | GGGLG | GKRA | DANLS |
| 36_468   | VLRECR | AI   | IVDGS | GGGLG | GKRA | DANLS |
| 37_4956  | VLRECR | AI   | IVDGS | GGGLG | GKRA | DANLS |
| 38_4305  | VLRECR | AI   | IVDGS | GGGLG | GKRA | DANLS |
| 39_4737  | VLRECR | AI   | IVDGS | GGGLG | GKRA | DANLS |
| 40_9543  | VLRECR | AI   | IVDGS | GGGLG | GKRA | DANLS |
| 41_6669  | VLRECR | AI   | IVDGS | GGGLG | GKRA | DANLS |
| 42_10558 | VLRECR | AI   | IVDGS | GGGLG | GKRA | DANLS |
| 43_8051  | VLRECR | AI   | IVDGS | GGGLG | GKRA | DANLS |
| 44_10454 | VLRECR | AI   | IVDGS | GGGLG | GKRA | DANLS |
| 45_10126 | VLRECR | AI   | IVDGS | GGGLG | GKRA | DANLS |
| 46_1547  | VLRECR | AI   | IVDGS | GGGLG | GKRA | DANLS |
| 47_6749  | VLRECR | AI   | IVDGS | GGGLG | GKRA | DANLS |
| 48_9982  | VLRECR | AI   | IVDGS | GGGLG | GKRA | DANLS |
| 49_7293  | VLRECR | AI   | IVDGS | GGGLG | GKRA | DANLS |
| 50_5993  | VLRECR | AI   | IVDGS | GGGLG | GKRA | DANLS |
| 51_4791  | VLRECR | AI   | IVDGS | GGGLG | GKRA | DANLS |
| 52_121   | VLRECR | AI   | IVDGS | GGGLG | GKRA | DANLS |
| 53_1667  | VLRECR | AI   | IVDGS | GGGLG | GKRA | DANLS |
| 54_10488 | VLRECR | AI   | IVDGS | GGGLG | GKRA | DANLS |
| 55_7733  | VLRECR | AI   | IVDGS | GGGLG | GKRA | DANLS |
| 56_3982  | VLRECR | AI   | IVDGS | GGGLG | GKRA | DANLS |
| 57_392   | VLRECR | AI   | IVDGS | GGGLG | GKRA | DANLS |
| 58_10291 | VLRECR | AI   | IVDGS | GGGLG | GKRA | DANLS |
| 59_5792  | VLRECR | AI   | IVDGS | GGGLG | GKRA | DANLS |
| 60_8712  | VLRECR | AI   | IVDGS | GGGLG | GKRA | DANLS |
| 61_6716  | VLRECR | AI   | IVDGS | GGGLG | GKRA | DANLS |
| 62_5599  | VLRECR | AI   | IVDGS | GGGLG | GKRA | DANLS |
| 63_304   | VLRECR | AI   | IVDGS | GGGLG | GKRA | DANLS |
| 64_10473 | VLRECR | AI   | IVDGS | GGGLG | GKRA | DANLS |
| 65_6310  | VLRECR | AI   | IVDGS | GGGLG | GKRA | DANLS |
| 66_8714  | VLRECR | AI   | IVDGS | GGGLG | GKRA | DANLS |
| 67_2350  | VLRECR | AI   | IVDGS | GGGLG | GKRA | DANLS |
| 68_2447  | VLRECR | AI   | IVDGS | GGGLG | GKRA | DANLS |
| 69_5658  | VLRECR | AI   | IVDGS | GGGLG | GKRA | DANLS |
| 70_1277  | VLRECR | AI   | IVDGS | GGGLG | GKRA | DANLS |
| 71_3717  | VLRECR | AI   | IVDGS | GGGLG | GKRA | DANLS |
| 72_7846  | VLRECR | AI   | IVDGS | GGGLG | GKRA | DANLS |
| 73_10528 | VLRECR | AI   | IVDGS | GGGLG | GKRA | DANLS |
| 74_4899  | VLRECR | AI   | IVDGS | GGGLG | GKRA | DANLS |
| 75_5507  | VLRECR | AI   | IVDGS | GGGLG | GKRA | DANLS |
| 76_5432  | VLRECR | AI   | IVDGS | GGGLG | GKRA | DANLS |
| 77_10770 | VLRECR | AI   | IVDGS | GGGLG | GKRA | DANLS |
| 78_5904  | VLRECR | AI   | IVDGS | GGGLG | GKRA | DANLS |
| 79_9653  | VLRECR | AI   | IVDGS | GGGLG | GKRA | DANLS |
| 80_4462  | VLRECR | AI   | IVDGS | GGGLG | GKRA | DANLS |
| 81_7194  | VLRECR | AI   | IVDGS | GGGLG | GKRA | DANLS |
| 82_1022  | VLRECR | AI   | IVDGS | GGGLG | GKRA | DANLS |
| 83_9813  | VLRECR | AI   | IVDGS | GGGLG | GKRA | DANLS |
| 84_1902  | VLRECR | AI   | IVDGS | GGGLG | GKRA | DANLS |
| 85_5152  | VLRECR | AI   | IVDGS | GGGLG | GKRA | DANLS |
| 86_3385  | VLRECR | AI   | IVDGS | GGGLG | GKRA | DANLS |
| 87_10760 | VLRECR | AI   | IVDGS | GGGLG | GKRA | DANLS |
| 88_1588  | VLRECR | AI   | IVDGS | GGGLG | GKRA | DANLS |
| 89_1609  | VLRECR | AI   | IVDGS | GGGLG | GKRA | DANLS |
| 90_4023  | VLRECR | AI   | IVDGS | GGGLG | GKRA | DANLS |

|          | 1390          | 1400          | 1410  | 1420     | 1430 | 1440         |
|----------|---------------|---------------|-------|----------|------|--------------|
| 1_4160   | SNLDRQTEVLVES | IMAARLQHATVVS | VMHRL | EA       | VAA  | YDKVAVL      |
| 2_6143   | SNLDRQTEVLVES | IMAARLQHATVVS | VMHRL | EA       | VAA  | YDKVAVL      |
| 3_6554   | SNLDRQTEVLVES | IMAARLQHATVVS | VMHRL | EA       | VAA  | YDKVAVL      |
| 4_111    | SNLDRQTEVLVES | IMAARLQHATVVS | VMHRL | EA       | VAA  | YDKVAVL      |
| 5_5742   | SNLDRQTEVLVES | IMAARLQHATVVS | VMHRL | EA       | VAA  | YDKVAVL      |
| 6_9490   | SNLDRQTEVLVES | IMAARLQHATVVS | VMHRL | EA       | VAA  | YDKVAVL      |
| 7_6313   | .....         |               |       |          |      |              |
| 8_2552   | SNLDRQTEVLVES | IMAARLQHATVVS | VMHRL | EA       | VAA  | YDKVAVL      |
| 9_7745   | SNLDRQTEVLVES | IMAARLQHATVVS | VMHRL | EA       | VAA  | YDKVAVL      |
| 10_2315  | SNLDRQTEVLVES | IMAARLQHATVVS | VMHRL | EA       | VAA  | YDKVAVL      |
| 11_2035  | SNLDRQTEVLVES | IMAARLQHATVVS | VMHRL | EA       | VAA  | YDKVAVL      |
| 12_9640  | SNLDRQTEVLVES | IMAARLQHATVVS | VMHRL | EA       | VAA  | YDKVAVL      |
| 13_3674  | SNLDRQTEVLVES | IMAARLQHATVVS | VMHRL | EA       | VAA  | YDKVAVL      |
| 14_6548  | SNLDRQTEVLVES | IMAARLQHATVVS | VMHRL | EA       | VAA  | YDKVAVL      |
| 15_10828 | SNLDRQTEVLVES | IMAARLQHATVVS | VMHRL | EA       | VAA  | YDKVAVL      |
| 16_6578  | SNLDRQTEVLVES | IMAARLQHATVVS | VMHRL | EA       | VAA  | YDKVAVL      |
| 17_10233 | SNLDRQTEVLVES | IMAARLQHATVVS | VMHRL | EA       | VAA  | YDKVAVL      |
| 18_9261  | SNLDRQTEVLVES | IMAARLQHATVVS | VMHRL | EA       | VAA  | YDKVAVL      |
| 19_8450  | SNLDRQTEVLVES | IMAARLQHATVVS | VMHRL | EA       | VAA  | YDKVAVL      |
| 20_1727  | SNLDRQTEVLVES | IMAARLQHATVVS | VMHRL | EA       | VAA  | YDKVAVL      |
| 21_206   | SNLDRQTEVLVES | IMAARLQHATVVS | VMHRL | EA       | VAA  | YDKVAVL      |
| 22_7439  | SNLDRQTEVLVES | IMAARLQHATVVS | VMHRL | EA       | VAA  | YDKVAVL      |
| 23_3780  | SNLDRQTEVLVES | IMAARLQHATVVS | VMHRL | EA       | VAA  | YDKVAVL      |
| 24_967   | SNLDRQTEVLVES | IMAARLQHATVVS | VMHRL | EA       | VAA  | YDKVAVL      |
| 25_6595  | SNLDRQTEVLVES | IMAARLQHATVVS | VMHRL | EA       | VAA  | YDKVAVL      |
| 26_8391  | SNLDRQTEVLVES | IMAARLQHATVVS | VMHRL | EA       | VAA  | YDKVAVL      |
| 27_8170  | SNLDRQTEVLVES | IMAARLQHATVVS | VMHRL | EA       | VAA  | YDKVAVL      |
| 28_5209  | SNLDRQTEVLVES | IMAARLQHATVVS | VMHRL | EA       | VAA  | YDKVAVL      |
| 29_2181  | SNLDRQTEVLVES | IMAARLQHATVVS | VMHRL | EA       | VAA  | YDKVAVL      |
| 30_8564  | SNLDRQTEVLVES | IMAARLQHATVVS | VMHRL | EA       | VAA  | YDKVAVL      |
| 31_1582  | SNLDRQTEVLVES | IMAARLQHATVVS | VMHRL | EA       | VAA  | YDKVAVL      |
| 32_4537  | SNLDRQTEVLVES | IMAARLQHATVVS | VMHRL | EA       | VAA  | YDKVAVL      |
| 33_9418  | SNLDRQTEVLVES | IMAARLQHATVVS | VMHRL | EA       | VAA  | YDKVAVL      |
| 34_1782  | SNLDRQTEVLVES | IMAARLQHATVVS | VMHRL | EA       | VAA  | YDKVAVL      |
| 35_10360 | SNLDRQTEVLVES | IMAARLQHATVVS | VMHRL | EA       | VAA  | YDKVAVL      |
| 36_468   | SNLDRQTEVLVES | IMAARLQHATVVS | VMHRL | EA       | VAA  | YDKVAVL      |
| 37_4956  | SNLDRQTEVLVES | IMAARLQHATVVS | VMHRL | EA       | VAA  | YDKVAVL      |
| 38_4305  | SNLDRQTEVLVES | IMAARLQHATVVS | VMHRL | EA       | VAA  | YDKVAVL      |
| 39_4737  | SNLDRQTEVLVES | IMAARLQHATVVS | VMHRL | EA       | VAA  | YDKVAVL      |
| 40_9543  | SNLDRQTEVLVES | IMAARLQHATVVS | VMHRL | EA       | VAA  | YDKVAVL      |
| 41_6669  | SNLDRQTEVLVES | IMAARLQHATVVS | VMHRL | EA       | VAA  | YDKVAVL      |
| 42_10558 | SNLDRQTEVLVES | IMAARLQHATVVS | VMHRL | EA       | VAA  | YDKVAVL      |
| 43_8051  | SNLDRQTEVLVES | IMAARLQHATVVS | VMHRL | EA       | VAA  | YDKVAVL      |
| 44_10454 | SNLDRQTEVLVES | IMAARLQHATVVS | VMHRL | EA       | VAA  | YDKVAVL      |
| 45_10126 | SNLDRQTEVLVES | IMAARLQHATVVS | VMHRL | EA       | VAA  | YDKVAVL      |
| 46_1547  | SNLDRQTEVLVES | IMAARLQHATVVS | VMHRL | EA       | VAA  | YDKVAVL      |
| 47_6749  | SNLDRQTEVLVES | IMAARLQHATVVS | VMHRL | EA       | VAA  | YDKVAVL      |
| 48_9982  | SNLDRQTEVLVES | IMAARLQHATVVS | VMHRL | EA       | VAA  | YDKVAVL      |
| 49_7293  | SNLDRQTEVLVES | IMAARLQHATVVS | VMHRL | EA       | VAA  | YDKVAVL      |
| 50_5993  | SNLDRQTEVLVES | IMAARLQHATVVS | VMHRL | EA       | VAA  | YDKVAVL      |
| 51_4791  | SVMHRL        | EA            | VAA   | YDKVAVL  | D    | KGVLVDFG     |
| 52_121   | SNLDRQTEVLVES | IMAARLQHATVVS | VMHRL | EA       | VAA  | YDKVAVL      |
| 53_1667  | SNLDRQTEVLVES | IMAARLQHATVVS | VMHRL | EA       | VAA  | YDKVAVL      |
| 54_10488 | SNLDRQTEVLVES | IMAARLQHATVVS | VMHRL | EA       | VAA  | YDKVAVL      |
| 55_7733  | SNLDRQTEVLVES | IMAARLQHATVVS | VMHRL | EA       | VAA  | YDKVAVL      |
| 56_3982  | SNLDRQTEVLVES | IMAARLQHATVVS | VMHRL | EA       | VAA  | YDKVAVL      |
| 57_392   | SNLDRQTEVLVES | IMAARLQHATVVS | VMHRL | EA       | VAA  | YDKVAVL      |
| 58_10291 | SNLDRQTEVLVES | IMAARLQHATVVS | VMHRL | EA       | VAA  | YDKVAVL      |
| 59_5792  | SNLDRQTEVLVES | IMAARLQHATVVS | VMHRL | EA       | VAA  | YDKVAVL      |
| 60_8712  | SNLDRQTEVLVES | IMAARLQHATVVS | VMHRL | EA       | VAA  | YDKVAVL      |
| 61_6716  | SNLDRQTEVLVES | IMAARLQHATVVS | VMHRL | EA       | VAA  | YDKVAVL      |
| 62_5599  | SNLDRQTEVLVES | IMAARLQHATVVS | VMHRL | EA       | VAA  | YDKVAVL      |
| 63_304   | SNLDRQTEVLVES | IMAARLQHATVVS | VMHRL | EA       | VAA  | YDKVAVL      |
| 64_10473 | .....         |               |       |          |      |              |
| 65_6310  | SNLDRQTEVLVES | IMAARLQHATVVS | VMHRL | EA       | VAA  | YDKVAVL      |
| 66_8714  | SNLDRQTEVLVES | IMAARLQHATVVS | VMHRL | EA       | VAA  | YDKVAVL      |
| 67_2350  | SNLDRQTEVLVES | IMAARLQHATVVS | VMHRL | EA       | VAA  | YDKVAVL      |
| 68_2447  | SNLDRQTEVLVES | IMAARLQHATVVS | VMHRL | EA       | VAA  | YDKVAVL      |
| 69_5658  | SNLDRQTEVLVES | IMAARLQHATVVS | VMHRL | EA       | VAA  | YDKVAVL      |
| 70_1277  | SNLDRQTEVLVES | IMAARLQHATVVS | VMHRL | EA       | VAA  | YDKVAVL      |
| 71_3717  | SNLDRQTEVLVES | IMAARLQHATVVS | VMHRL | EA       | VAA  | YDKVAVL      |
| 72_7846  | SNLDRQTEVLVES | IMAARLQHATVVS | VMHRL | EA       | VAA  | YDKVAVL      |
| 73_10528 | SNLDRQTEVLVES | IMAARLQHATVVS | VMHRL | EA       | VAA  | YDKVAVL      |
| 74_4899  | SNLDRQTEVLVES | IMAARLQHATVVS | VMHRL | EA       | VAA  | YDKVAVL      |
| 75_5507  | SNLDRQTEVLVES | IMAARLQHATVVS | VMHRL | EA       | VAA  | YDKVAVL      |
| 76_5432  | SNLDRQTEVLVES | IMAARLQHATVVS | VMHRL | EA       | VAA  | YDKVAVL      |
| 77_10770 | SNLDRQTEVLVES | IMAARLQHATVVS | VMHRL | EA       | VAA  | YDKVAVL      |
| 78_5904  | SNLDRQTEVLVES | IMAARLQHATVVS | VMHRL | EA       | VAA  | YDKVAVL      |
| 79_9653  | SNLDRQTEVLVES | IMAARLQHATVVS | VMHRL | EA       | VAA  | YDKVAVL      |
| 80_4462  | SNLDRQTEVLVES | IMAARLQHATVVS | VMHRL | EA       | VAA  | YDKVAVL      |
| 81_7194  | AVAA          | YDKVAVL       | D     | KGVLVDFG | P    | VTDMARCELFTG |
| 82_1022  | SNLDRQTEVLVES | IMAARLQHATVVS | VMHRL | EA       | VAA  | YDKVAVL      |
| 83_9813  | SNLDRQTEVLVES | IMAARLQHATVVS | VMHRL | EA       | VAA  | YDKVAVL      |
| 84_1902  | SNLDRQTEVLVES | IMAARLQHATVVS | VMHRL | EA       | VAA  | YDKVAVL      |
| 85_5152  | SNLDRQTEVLVES | IMAARLQHATVVS | VMHRL | EA       | VAA  | YDKVAVL      |
| 86_3385  | SNLDRQTEVLVES | IMAARLQHATVVS | VMHRL | EA       | VAA  | YDKVAVL      |
| 87_10760 | SNLDRQTEVLVES | IMAARLQHATVVS | VMHRL | EA       | VAA  | YDKVAVL      |
| 88_1588  | SNLDRQTEVLVES | IMAARLQHATVVS | VMHRL | EA       | VAA  | YDKVAVL      |
| 89_1609  | SNLDRQTEVLVES | IMAARLQHATVVS | VMHRL | EA       | VAA  | YDKVAVL      |
| 90_4023  | SNLDRQTEVLVES | IMAARLQHATVVS | VMHRL | EA       | VAA  | YDKVAVL      |

|          |        |
|----------|--------|
| 1_4160   | CELFTG |
| 2_6143   | CELFTG |
| 3_6554   | CELFTG |
| 4_111    | CELFTG |
| 5_5742   | CELFTG |
| 6_9490   | CELFTG |
| 7_6313   | .....  |
| 8_2552   | CELFTG |
| 9_7745   | CELFTG |
| 10_2315  | CELFTG |
| 11_2035  | CELFTG |
| 12_9640  | CELFTG |
| 13_3674  | CELFTG |
| 14_6548  | CELFTG |
| 15_10828 | CELFTG |
| 16_6578  | CELFTG |
| 17_10233 | CELFTG |
| 18_9261  | CELFTG |
| 19_8450  | CELFTG |
| 20_1727  | CELFTG |
| 21_206   | CELFTG |
| 22_7439  | CELFTG |
| 23_3780  | CELFTG |
| 24_967   | CELFTG |
| 25_6595  | CELFTG |
| 26_8391  | CELFTG |
| 27_8170  | CELFTG |
| 28_5209  | CELFTG |
| 29_2181  | CELFTG |
| 30_8564  | CELFTG |
| 31_1582  | CELFTG |
| 32_4537  | CELFTG |
| 33_9418  | CELFTG |
| 34_1782  | CELFTG |
| 35_10360 | CELFTG |
| 36_468   | CELFTG |
| 37_4956  | CELFTG |
| 38_4305  | CELFTG |
| 39_4737  | CELFTG |
| 40_9543  | CELFTG |
| 41_6669  | CELFTG |
| 42_10558 | CELFTG |
| 43_8051  | CELFTG |
| 44_10454 | CELFTG |
| 45_10126 | CELFTG |
| 46_1547  | CELFTG |
| 47_6749  | CELFTG |
| 48_9982  | CELFTG |
| 49_7293  | CELFTG |
| 50_5993  | CELFTG |
| 51_4791  | .....  |
| 52_121   | CELFTG |
| 53_1667  | CELFTG |
| 54_10488 | CELFTG |
| 55_7733  | CELFTG |
| 56_3982  | CELFTG |
| 57_392   | CELFTG |
| 58_10291 | CELFTG |
| 59_5792  | CELFTG |
| 60_8712  | CELFTG |
| 61_6716  | CELFTG |
| 62_5599  | CELFTG |
| 63_304   | CELFTG |
| 64_10473 | .....  |
| 65_6310  | CELFTG |
| 66_8714  | CELFTG |
| 67_2350  | CELFTG |
| 68_2447  | CELFTG |
| 69_5658  | CELFTG |
| 70_1277  | CELFTG |
| 71_3717  | CELFTG |
| 72_7846  | CELFTG |
| 73_10528 | CELFTG |
| 74_4899  | CELFTG |
| 75_5507  | CELFTG |
| 76_5432  | CELFTG |
| 77_10770 | CELFTG |
| 78_5904  | CELFTG |
| 79_9653  | CELFTG |
| 80_4462  | CELFTG |
| 81_7194  | .....  |
| 82_1022  | CELFTG |
| 83_9813  | CELFTG |
| 84_1902  | CELFTG |
| 85_5152  | CELFTG |
| 86_3385  | CELFTG |
| 87_10760 | CELFTG |
| 88_1588  | CELFTG |
| 89_1609  | CELFTG |
| 90_4023  | CELFTG |
