# Supplementary material for: ABCC Transporter Gene MoABC-R1 Is Associated with Pyraclostrobin Tolerance in Magnaporthe oryzae
Source: MDPI journal article supplement (doi:10.3390/jof9090917), 2023-09-11
Supplement: s1 [file s1]

>RB22

ITILKNIKSYIKIIHLYSINLKGIFSILYLVLFFFSLQVFLLLGSLLNRWYARLLIKVISFYLLQYLV  
LEGFIILKKCSFIHLTINTKKLKIILLMVKLLIETIKYMLNLIQMLCLVLWQLFLLHFYYSCLIK  
NDVWVLYWYNLYLAINEYDIIYRVCICYSYFIFSHFYICSSSLSRKIYFRVWFPFFRAKNTIRYKI  
LYFCFSLFTFRFRNIINFPRSVCWYLSFSYFNFYSYNNYRIYIIRKRSNRQQTKIYTIERLPYR  
VCWNRGFVKLRQKTKKPTKGLMGSYKKMITYIYSYIFITITRIIYIYIILLYIKIIIRYNYSILLY  
KNIIYPIINFIFLIIFFYIMLTHLQMKRTKYCCYSSGYRKIFLYYLFLLGSFSVRGYMDGRRVFIL  
MNSGFKLTLFMNLNYYINVGYDRIMYSLRVKRDTPYNTYWFRVEYIYLRVKNIYIYIINIVI  
YWYGLNQVYILSFDKHLFFYLLLLLYCEINNYYNIILHSTYLGILSYLAINDSNQILFSLVWNNDL  
LIHWFFDSKKRVNNFLDQKYYFLQKAYAFHFFDKQLLLIFGCLLVLTITKFFQFLYKFKEYKVIH  
YNILTLSMRHNQVTLVTCEILVHYLFVYKLLPVLHLCIIVLVWKLTTQSIEMLTGDFVIYIYIQL  
LLSFSCIYTEEVYITDHIELLVLFELLVLLYYWLSVSVMFYLMDRCHYEVLQLLLILLVLYLEGKI  
LLNSFEVVFLIMPLTDFLHYILYCLLYLLFCTLHFMILLVQAILLVFQVITIELHLLHIFYLKILLF  
LYLFLYVLLYSLCLMFGIVIIILWLILCKLLLLLYLNDTYYSMLFDLYLINYVLRCLVLFLLCYY  
LLQIVDLEVYNLDHLVKLSEFLLISFCNVLNTLKIHLYYVNVLYYTLVILLLYYLLVTIIVLIYLI  
NLNYFIKLTKYIKIIYIFYLRYYSILGFQFIIYIILCITLHLALANLLFPLVWNNDLLIHWFFESKK  
EIRNIFLLLLILFLKNIHFALPFSCIKMNDIKNKYLNYSYVILSYIATHIRSCINTCTCLISCSLCYSC  
KKNYGYAKKIRSCRLWTIASICCLKTFIKRICSSYTIYCSFLFRSCNNFNFCIIRLRCYTLWSW  
FRDKRHEFRYILHVSCVIFSIRYISWLKCEIRFSRFSKYSSINLINIKFSYINSNYDNRKFKFNCL  
YISKSYLIYTTFISCVYNIFHRIYSDKSSFFSRGPANLVWSGYMSQIARKPFYFKNKRQLAGNLIP  
NKYIIKLFIDTQFNIIYILFIYMIKDIVNHRCESTKKKHMGTPLGESELVSGFMTEHAAVVF  
VFFFLAEYGSIVLMCILTILFIGGYLLFEISYVFTVVNYIFFELFFIDVTFVEVQSLYTDFLNNSIIE  
GLLYGFNLGLKSSLMIFTFIARASFPRIKFDQLMGFCTVLLPINFAIILVPCVLYSFNLLPVNIPLF  
LTHPPALLPQGYSTYEEGNRSRTILVNNTYTKTIYHTRECNYTLFLYSTLLAYYYLYMIIILLNL  
LGYINKKFVNFFHHFLIQNTNF

>F-1

ITILKNIKSYIKIIHLYSINLKGIFSILYLVLFFFSLQVFLLLGSLLNRWYARLLIKVISFYLLQYLV  
LEGFIILKKCSFIHLTINTKKLKIILLMVKLLIETIKYMLNLIQMLCLVLWQLFLLHFYYSCLIK  
NDVWVLYWYNLYLAINEYDIIYRVCICYSYFIFSHFYICSSSLSRKIYFRVWFPFFRAKNTIRYKI  
LYFCFSLFTFRFRNIINFPRSVCWYLSFSYFNFYSYNNYRIYIIRKRSNRQQTKIYTIERLPYR  
VCWNRGFVKLRQKTKKPTKGLMGSYKKMITYIYSYIFITITRIIYIYIILLYIKIIIRYNYSILLY  
KNIIYPIINFIFLIIFFYIMLTHLQMKRTKYCCYSSGYRKIFLYYLFLLGSFSVRGYMDGRRVFIL  
MNSGFKLTLFMNLNYYINVGYDRIMYSLRVKRDTPYNTYWFRVEYIYLRVKNIYIYIINIVI  
YWYGLNQVYILSFDKHLFFYLLLLLYCEINNYYNIILHSTYLGILSYLAINDSNQILFSLVWNNDL  
LIHWFFDSKKRVNNFLDQKYYFLQKAYAFHFFDKQLLLIFGCLLVLTITKFFQFLYKFKEYKVIH  
YNILTLSMRHNQVTLVTCEILVHYLFVYKLLPVLHLCIIVLVWKLTTQSIEMLTGDFVIYIYIQL  
LLSFSCIYTEEVYITDHIELLVLFELLVLLYYWLSVSVMFYLMDRCHYEVLQLLLILLVLYLEGKI  
LLNSFEVVFLIMPLTDFLHYILYCLLYLLFCTLHFMILLVQAILLVFQVITIELHLLHIFYLKILLF  
LYLFLYVLLYSLCLMFGIVIIILWLILCKLLLLLYLNDTYYSMLFDLYLINYVLRCLVLFLLCYY  
LLQIVDLEVYNLDHLVKLSEFLLISFCNVLNTLKIHLYYVNVLYYTLVILLLYYLLVTIIVLIYLI  
NLNYFIKLTKYIKIIYIFYLRYYSILGFQFIIYIILCITLHLALANLLFPLVWNNDLLIHWFFESKK  
EIRNIFLLLLILFLKNIHFALPFSCIKMNDIKNKYLNYSYVILSYIATHIRSCINTCTCLISCSLCYSC  
KKNYGYAKKIRSCRLWTIASICCLKTFIKRICSSYTIYCSFLFRSCNNFNFCIIRLRCYTLWSW  
FRDKRHEFRYILHVSCVIFSIRYISWLKCEIRFSRFSKYSSINLINIKFSYINSNYDNRKFKFNCL

YISKSYLIYTTFISCVYNIFHRIYSDKSSFFSRGPANLVWSGYMSQIARKPFYFKNKRQLAGNLIP  
NKYIIKLFIDTQFNIYIYLFYIMIKDIVNHRCESTKKKHMGTPLLGESLVSFGFMTEHA AVVF  
VFFFLAEYGSIVLMCILTILFIGGYLLFEISYVFTVVNYIFFELFFIDVTFVEVQSLYTDFLNNSIIE  
GLLYGFNLGLKSSLMIFTFIARASFPRIKFDQLMGFCTVLLPINFAIHLVPCVLYSFNLLPVNIPLF  
LTHPPALLPQGYSTYEEGNRSRTILVNNYTYTKTIYHTRECNYTLFLYSTLLAYYYLYMIHLLNL  
LGYINKKFVNFFHHFLIQNTNF

>F-2

ITILKNIKSYIKIIHLYSINLKGIFSILYLVLFFFSLQVFLLLGSLLNRWYARLLIKVISFYLLQYLV  
LEGFIILKKCSFIHLTINTKKLKIILLMVKLLIETIKYMLNLIQMLCLVLWQLFLLHFYYSCLIK  
NDVWVLYWYNLYLAINEYDIIYRVCICYSYFIFSHFYICSSSLSRKIYFRVWFPFRAKNTIRYKI  
LYFCFSLFTFRFRNIINFPRSVWCWYLSFSYFNFYSYNNYRIYIIRKRSNRQQTKIYTIERLPYR  
VCWNRGFVKLRQKTKKPTKGLMGSYKKMITYIYSYIFTITRIIYIYIILLYIKIIIRYNYSILLY  
KNIIYPIINFIFLIIFFYIMLTHLQMKRTKYCCYSSGYRKIFLYYFLLLGSFSVRGYMDGRRVFIL  
MNSGFKLTLFMNLNYYNINVGYDRIMYSLRVKRDTPTYNTYWFRVEYIYLRVKNIYIYIINIVI  
YWYGLNQVYILSFDKHLFFYLLLLLYCEINNYYNIHSTYLGILSYLAINDSNQILFSLVWNNDL  
LIHWFFDSKKRVNNFLDQKYYFLQKAYAFHFFDKQLLLIFGCLLVLTITKFFQFLYKFKEYKVIH  
YNILTLSMRHNQVTLVTCEILVHYLFVYKLLPVLHLCIIVLVWKLTTQSIEMITGDFVIYIYIQL  
LLSFSCIYTEEVYITDHIELLVLFELLVLLYYWLSVSVMFYLMDRCHYEVLQLLLILLVLYLEGKI  
LLNSFEVVFLIMPLTDFLHYILYCLLYLLFCTLHFMILLVQAILLVFQVITIELHLLHIFYLKILLF  
LYLFLYVLLYSLCMLFGIVIIILWLILCKLLLLLYLNDTYYSMLFDLYLINYVLRCLVLFLLCYY  
LLQIVDLEVYNLDHLVKLSEFLLISFCNVLNTLKIHLYYVNVLYYTLVILLYYLLVTIIVLIYLI  
NLNYFIKLTKYIKIIYIFYLRYYSILGFQFIYIILCITLHLALANLLFPLVWNNDLLIHWFFESKK  
EIRNIFLLLLILFLKNIHFALPFSCIKMNDIKNKYLNYSYVILSYIATHIRSCINTCTCLISCSLCYSC  
KKNYGYAKKIRSCRLWTIASICCLKTFIKRICSSYTIYCSFLFRSCNNFNFCIIRLRCTLWSW  
FRDKRHEFRYILHVSCVIFSIRYSISWLKCEIRFSRFSKYSSINLINIKFSYINSNYDNRKFKFNCL  
YISKSYLIYTTFISCVYNIFHRIYSDKSSFFSRGPANLVWSGYMSQIARKPFYFKNKRQLAGNLIP  
NKYIIKLFIDTQFNIYIYLFYIMIKDIVNHRCESTKKKHMGTPLLGESLVSFGFMTEHA AVVF  
VFFFLAEYGSIVLMCILTILFIGGYLLFEISYVFTVVNYIFFELFFIDVTFVEVQSLYTDFLNNSIIE  
GLLYGFNLGLKSSLMIFTFIARASFPRIKFDQLMGFCTVLLPINFAIHLVPCVLYSFNLLPVNIPLF  
LTHPPALLPQGYSTYEEGNRSRTILVNNYTYTKTIYHTRECNYTLFLYSTLLAYYYLYMIHLLNL  
LGYINKKFVNFFHHFLIQNTN

>H-2

ITILKNIKSYIKIIHLYSINLKGIFSILYLVLFFFSLQVFLLLGSLLNRWYARLLIKVISFYLLQYLV  
LEGFIILKKCSFIHLTINTKKLKIILLMVKLLIETIKYMLNLIQMLCLVLWQLFLLHFYYSCLIK  
NDVWVLYWYNLYLAINEYDIIYRVCICYSYFIFSHFYICSSSLSRKIYFRVWFPFRAKNTIRYKI  
LYFCFSLFTFRFRNIINFPRSVWCWYLSFSYFNFYSYNNYRIYIIRKRSNRQQTKIYTIERLPYR  
VCWNRGFVKLRQKTKKPTKGLMGSYKKMITYIYSYIFTITRIIYIYIILLYIKIIIRYNYSILLY  
KNIIYPIINFIFLIIFFYIMLTHLQMKRTKYCCYSSGYRKIFLYYFLLLGSFSVRGYMDGRRVFIL  
MNSGFKLTLFMNLNYYNINVGYDRIMYSLRVKRDTPTYNTYWFRVEYIYLRVKNIYIYIINIVI  
YWYGLNQVYILSFDKHLFFYLLLLLYCEINNYYNIHSTYLGILSYLAINDSNQILFSLVWNNDL  
LIHWFFDSKKRVNNFLDQKYYFLQKAYAFHFFDKQLLLIFGCLLVLTITKFFQFLYKFKEYKVIH  
YNILTLSMRHNQVTLVTCEILVHYLFVYKLLPVLHLCIIVLVWKLTTQSIEMITGDFVIYIYIQL  
LLSFSCIYTEEVYITDHIELLVLFELLVLLYYWLSVSVMFYLMDRCHYEVLQLLLILLVLYLEGKI  
LLNSFEVVFLIMPLTDFLHYILYCLLYLLFCTLHFMILLVQAILLVFQVITIELHLLHIFYLKILLF

LYLFLYVLLYSLCMLFGIVIIIWLILCKLLLLLYLNDTYYLSMLFDLYLINYVLRCLVLFLLCYY  
LLQIVDLEVYNLDHLVKLSEFLLISFCNVLNTLKIHLYYVNVLYYTLVILLYYLLVTHIYLIYLI  
NLNYFIKLTKYIKIIYIFYLRYYSILGFQFIIYIILCITLHLALANLLFPLVWNNDLLIHWFFESKK  
EIRNIFLLLLLILFLKNIHFALPFSCIKMNDIKNKYLNYSYVILSYIATHIRSCINTCTCLISCSLCYSC  
KKNYGYAKKIRSCCRLLWTIASICCLKTFIKRICSSYTIYCSFLFRSCNNFNFCIIRLRCTLWSW  
FRDKRHEFRYILHVSCVIFSIRYSISWLKCEIRFSRFSKYSSINLINIKFSYINSNYDNRKFKFNCL  
YISKSYLIYTTFISCVYNIFHRIYSDKSSFFSRGPANLVWSGYMSQIARKPFYFKNKRQLAGNLIP  
NKYIIKLFIDTQFNIYIYLFYIMIKDIVNHRCESTKKKHMGTPLLGESELVSGFMTEHAAVVF  
VFFFLAEYGSIVLMCILTILFIGGYLLFEISYVFTVVNYIFFELFFIDVTFVEVQSLYTDFLNNSIIE  
GLLYGFNLGLKSSLMIFTFIARASFPRIKFDQLMGFCTVLLPINFAIIILVPCVLYSFNLLPVNIPLF  
LTHPPALLPQGYSTYEEGNRSRTILVNNTYTKTIYHTRECNYTLFLYSTLLAYYYLYMIIILLNL  
LGYINKKFVNFFHHFLIQNTNF

>Hei-1

ITILKNIKSYIKIIHLYSINLKGIFSILYLVLFFFSLQVFLLLGSLLNRWYARLLIKVISFYLLQYLV  
LEGFIILKKCSFIHILTINTKKLKIILLMVKLLIETIKYMLNLIQMLCLVLWQLFLLHFYYSCLIK  
NDVWVLYWYNLYLAINEYDIIYRVCICYSYFIFSHFYICSSSLSRKIYFRVWFPFRAKNTIRYKI  
LYFCFSLFTFRFRNIINFPRSVWCWYLSFSYFNFYSYNNYRIYIIRKRSNRQQTKIYTIERLPYR  
VCWNRGFVKLRQKTKKPTKGLMGSYKKMITYIYSYIIFTITRIIYIYIILLYIKIIIRYNYSILLY  
KNIYPIINFIFLIIFFYIMLTHLQMKRTKYCCYSSGYRKIFLYYLFLLGSFSVRGYMDGRRVFIL  
MNSGFKLTLMFNLYNYINVGYDRIMYSLRVKRDTPYNTYWFRVEYIYLRVKNIYIYIINIVI  
YWYGLNQVYILSFDKHLFFYLLLLLYCEINNYNILHSTYLGILSYLAINDSNQILFSLVWNNDL  
LIHWFFDSKKRVNNFLDQKYYFLQKAYAFHFFDKQLLLIFGCLLVLTITKFFQFLYKFKEYKVIH  
YNILTLMSMRHNQVTLVTCeilVHYLFVYKLLPVLHLCIIVLVWKLTTQSIEMITGDFVIYIYIQL  
LLSFSCIYTEEVYITDHIELLVLFELLVLLYYWLSVSVMFYLMDRCHYEVLQLLLILLVLYLEGKI  
LLNSFEVVFLIMPLTDFLHYILYCLLYLLFCTLHFMILLVQAILLVFQVITIELHLLHIFYLKILLF  
LYLFLYVLLYSLCMLFGIVIIIWLILCKLLLLLYLNDTYYLSMLFDLYLINYVLRCLVLFLLCYY  
LLQIVDLEVYNLDHLVKLSEFLLISFCNVLNTLKIHLYYVNVLYYTLVILLYYLLVTHIYLIYLI  
NLNYFIKLTKYIKIIYIFYLRYYSILGFQFIIYIILCITLHLALANLLFPLVWNNDLLIHWFFESKK  
EIRNIFLLLLLILFLKNIHFALPFSCIKMNDIKNKYLNYSYVILSYIATHIRSCINTCTCLISCSLCYSC  
KKNYGYAKKIRSCCRLLWTIASICCLKTFIKRICSSYTIYCSFLFRSCNNFNFCIIRLRCTLWSW  
FRDKRHEFRYILHVSCVIFSIRYSISWLKCEIRFSRFSKYSSINLINIKFSYINSNYDNRKFKFNCL  
YISKSYLIYTTFISCVYNIFHRIYSDKSSFFSRGPANLVWSGYMSQIARKPFYFKNKRQLAGNLIP  
NKYIIKLFIDTQFNIYIYLFYIMIKDIVNHRCESTKKKHMGTPLLGESELVSGFMTEHAAVVF  
VFFFLAEYGSIVLMCILTILFIGGYLLFEISYVFTVVNYIFFELFFIDVTFVEVQSLYTDFLNNSIIE  
GLLYGFNLGLKSSLMIFTFIARASFPRIKFDQLMGFCTVLLPINFAIIILVPCVLYSFNLLPVNIPLF  
LTHPPALLPQGYSTYEEGNRSRTILVNNTYTKTIYHTRECNYTLFLYSTLLAYYYLYMIIILLNL  
LGYINKKFVNFFHHFLIQNTNF

>Hei-3

ITILKNIKSYIKIIHLYSINLKGIFSILYLVLFFFSLQVFLLLGSLLNRWYARLLIKVISFYLLQYLV  
LEGFIILKKCSFIHILTINTKKLKIILLMVKLLIETIKYMLNLIQMLCLVLWQLFLLHFYYSCLIK  
NDVWVLYWYNLYLAINEYDIIYRVCICYSYFIFSHFYICSSSLSRKIYFRVWFPFRAKNTIRYKI  
LYFCFSLFTFRFRNIINFPRSVWCWYLSFSYFNFYSYNNYRIYIIRKRSNRQQTKIYTIERLPYR  
VCWNRGFVKLRQKTKKPTKGLMGSYKKMITYIYSYIIFTITRIIYIYIILLYIKIIIRYNYSILLY  
KNIYPIINFIFLIIFFYIMLTHLQMKRTKYCCYSSGYRKIFLYYLFLLGSFSVRGYMDGRRVFIL

MNSGFKLTLFMNLNYYINVGYDRIMYSLRVKRDTPYNTYWFRVEYIYLRVKNIYIQYIINIVI  
YWYGLNQVYILSFDKHLFFYLLLLLYCEINNYNIILHSTYLGILSYLAINDSNQILFSLVWNNDL  
LIHWFFDSKKRVNNFLDQKYYFLQKAYAFHFFDKQLLLIFGCLLVLTITKFFQFLYKFKEYKVIH  
YNILTSMRHNQVTLVTCEILVHYLFVYKLLPVLHLCIIVLVWKLTTQSIEMLITGDFVIYIVIQ  
LLSFSCIYTEEVYITDHIELLVLFELLVLLYYWLSVSVMFYLMDRCHYEVLQLLLILLVLYLEGKI  
LLNSFEVVFLIMPLTDFLHYILYCLLYLLFCTLHFMILLVQAILLVFQVITIELHLLHIFYLKILLF  
LYLFLYVLLYSLCCLMFGIVIIILWLILCKLLLLLYLNDTYYSMLFDLYLINYVLRCLVLFLLCY  
LLQIVDLEVYNLDHLVKLSEFLLISFCNVLNTLKIHLYYVNVLYYTLVILLYYLLVTIIVLIYLI  
NLNYFIKLTKEYIKIIYIFYLRYYSILGFQFIYIILCITLHLALANLLFPLVWNNDLLIHWFFESKK  
EIRNIFLLLLILFLKNIHFALPFSCIKMNDIKNKYLNYSYVILSYIATHIRSCINTCTCLISCSLCYSC  
KKNYGYAKKIRSCCRLLWTIASICCLKTFIKRICSSYTIYCSFLFRSCNNFNFCIIRLRCYTLWSW  
FRDKRHEFRYILHVSCVIFSIRYSISWLKCEIRFSRFSKYSSINLINIKFSYINSNYDNRKFKFNCL  
YISKSYLIYTTFISCVYNIFHRIYSDKSSFFSRGPANLVWSGYMSQIARKPFYFKNKRQLAGNLIP  
NKYIILKFIDTQFNIIYIFYIYMIKDIVNHRCESTKKKHMGTPLGESELVSGFMTEHA AVVF  
VFFFLAEYGSIVLMCILTILFIGGYLLFEISYVFTVVNYIFFELFFIDVTFVEVQSLYTDFLNNSIIE  
GLLYGFNLGLKSSLMIFTFIARASFPRIREFDQLMGFCTVLLPINFAIILVPCVLYSFNLLPVNIPLF  
LTHPPALLPQGYSTYEEGNRSRTILVNNTYTYTKTIYHTRECNYTLFLYSTLLAYYYLYMIHLLNL  
LGYINKKFVNFFHHFLIQNTNF

>Hu-1

ITILKNIKSYIKIIHLYSINLKGIFSILYLVLLLFSLQVFLLLGSLNRWYARLLIKVISFYLLQYLV  
LEGFIILKKCSFIHLLTINTKKLKIILLMVKLLIETIKYMLNLIQMLCLVLWQLFLLHFIYSSCLIK  
NDVWVLYWYNLYLAINEYDIIYRVCICYSYFIFSHFYICSSLSRKIYFRVWFPFFRAKNTIRYKI  
LYFCFSLFTFRFRNIINFPRSVWCWYLSFSYFNFSYNNYRIYIIRKRSNRQQTKIIYTIERLPYR  
VCWNRGFVKLRQKTKKPTKGLMGSYKKMITYIYSYIYFTITRIIYIYIILLYIKIIIRYNYSILLY  
KNIIYPIINFIFFLIIFFYIMLTHLQMKRTKYCCYSSGYRKIFLYYFLLGSFSVRGYMDGRRVFIL  
MNSGFKLTLFMNLNYYINVGYDRIMYSLRVKRDTPYNTYWFRVEYIYLRVKNIYIQYIINIVI  
YWYGLNQVYILSFDKHLFFYLLLLLYCEINNYNIILHSTYLGILSYLAINDSNQILFSLVWNNDL  
LIHWFFDSKKRVNNFLDQKYYFLQKAYAFHFFDKQLLLIFGCLLVLTITKFFQFLYKFKEYKVIH  
YNILTSMRHNQVTLVTCEILVHYLFVYKLLPVLHLCIIVLVWKLTTQSIEMLITGDFVIYIVIQ  
LLSFSCIYTEEVYITDHIELLVLFELLVLLYYWLSVSVMFYLMDRCHYEVLQLLLILLVLYLEGKI  
LLNSFEVVFLIMPLTDFLHYILYCLLYLLFCTLHFMILLVQAILLVFQVITIELHLLHIFYLKILLF  
LYLFLYVLLYSLCCLMFGIVIIILWLILCKLLLLLYLNDTYYSMLFDLYLINYVLRCLVLFLLCY  
LLQIVDLEVYNLDHLVKLSEFLLISFCNVLNTLKIHLYYVNVLYYTLVILLYYLLVTIIVLIYLI  
NLNYFIKLTKEYIKIIYIFYLRYYSILGFQFIYIILCITLHLALANLLFPLVWNNDLLIHWFFESKK  
EIRNIFLLLLILFLKNIHFALPFSCIKMNDIKNKYLNYSYVILSYIATHIRSCINTCTCLISCSLCYSC  
KKNYGYAKKIRSCCRLLWTIASICCLKTFIKRICSSYTIYCSFLFRSCNNFNFCIIRLRCYTLWSW  
FRDKRHEFRYILHVSCVIFSIRYSISWLKCEIRFSRFSKYSSINLINIKFSYINSNYDNRKFKFNCL  
YISKSYLIYTTFISCVYNIFHRIYSDKSSFFSRGPANLVWSGYMSQIARKPFYFKNKRQLAGNLIP  
NKYIILKFIDTQFNIIYIFYIYMIKDIVNHRCESTKKKHMGTPLGESELVSGFMTEHA AVVF  
VFFFLAEYGSIVLMCILTILFIGGYLLFEISYVFTVVNYIFFELFFIDVTFVEVQSLYTDFLNNSIIE  
GLLYGFNLGLKSSLMIFTFIARASFPRIREFDQLMGFCTVLLPINFAIILVPCVLYSFNLLPVNIPLF  
LTHPPALLPQGYSTYEEGNRSRTILVNNTYTYTKTIYHTRECNYTLFLYSTLLAYYYLYMIHLLNL  
LGYINKKFVNFFHHFLIQNTNF

>Hu-2

ITILKNIKSYIKIIHLYSINLKGIFSILYLVLFFFSLQVFLLLGSLLNRWYARLLIKVISFYLLQYLV  
LEGFIILKKCSFIHILTINTKKLKIILLMVKLLIETIKYMLNLIQMLCLVLWQLFLLHFYYSCLIK  
NDVWVLYWYNLYLAINEYDIIYRVCICYSYFIFSHFYICSSSLSRKIYFRVWFPFFRAKNTIRYKI  
LYFCFSLFTFRFRNIINFPRSVCWYLSFSYFNFYSYNNYRIYIIRKRSNRQQTKIYTIERLPYR  
VCWNRGFVKLRQKTKKPTKGLMGSYKKMITYIYSYIFTITRIIYIYIILLYIKIIIRYNYSILLY  
KNIIYPIINFIFFLIIFFYIMLTHLQMKRTKYCCYSSGYRKIFLYYLFLLGSFSVRGYMDGRRVFIL  
MNSGFKLTLFMNLNYYNINVGYDRIMYSLRVKRDTPTYNTYWFRVEYIYLRVKNIYIYIINIVI  
YWYGLNQVYILSFDKHLFFYLLLLLYCEINNYYNIILHSTYLGILSYLAINDSNQILFSLVWNNDL  
LIHWFFDSKKRVNNFLDQKYYFLQKAYAFHFFDKQLLLIFGCLLVLTITKFFQFLYKFKEYKVIH  
YNILTLMSMRHNQVTLVTCEILVHYLFVYKLLPVLHLCIIVLVWKLTTQSIEMLITGDFVIYIYIQL  
LLSFSCIYTEEVYITDHIELLVLFELLVLLYYWLSVSVMFYLMDRCHYEVLQLLLILLVLYLEGKI  
LLNSFEVVFLIMPLTDFLHYILYCLLYLLFCTLHFMILLVQAILLVFQVITIELHLLHIFYLKILLF  
LYLFLYVLLYSLCMLFGIVIIILWLILCKLLLLLYLNDTYYSMLFDLYLINYVLRCLVLFLLCYY  
LLQIVDLEVYNLDHLVKLSEFLLISFCNVLNTLKIHLYYVNVLYYTLVILLYYLLVTHIYLIYLI  
NLNYFIKLTKYIKIIYIFYLRYYSILGFQFIYIILCITLHLALANLLFPLVWNNDLLIHWFFESKK  
EIRNIFLLLLILFLKNIHFALPFSCIKMNDIKNKYLNYSYVILSYIATHIRSCINTCTCLISCSLCYSC  
KKNYGYAKKIRSCCRLLWTIASICCLKTFIKRICSSYTIYCSFLFRSCNNFNFCIIRLRCTLWSW  
FRDKRHEFRYILHVSCVIFSIRYSISWLKCEIRFSRFSKYSSINLINIKFSYINSNYDNRKFKFNCL  
YISKSYLIYTTFISCVYNIFHRIYSDKSSFFSRGPANLVWSGYMSQIARKPFYFKNKRQLAGNLIP  
NKYIILKFIDTQFNIYIYLFYIMIKDIVNHRCESTKKKHMGTPLGESELVSGFMTEHAAVVF  
VFFFLAEYGSIVLMCILTILFIGGYLLFEISYVFTVVNYIFFELFFIDVTFVEVQSLYTDFLNNSIIE  
GLLYGFNLGLKSSLMIFTFIARASFPRIKFDQLMGFCTVLLPINFAIILVPCVLYSFNLLPVNIPLF  
LTHPPALLPQGYSTYEEGNRSRTILVNNTYTKTIYHTRECNYTLFLYSTLLAYYYLYMIIILLNL  
LGYINKKFVNFFHHFLIQNTNF

>-1

ITILKNIKSYIKIIHLYSINLKGIFSILYLVLFFFSLQVFLLLGSLLNRWYARLLIKVISFYLLQYLV  
LEGFIILKKCSFIHILTINTKKLKIILLMVKLLIETIKYMLNLIQMLCLVLWQLFLLHFYYSCLIK  
NDVWVLYWYNLYLAINEYDIIYRVCICYSYFIFSHFYICSSSLSRKIYFRVWFPFFRAKNTIRYKI  
LYFCFSLFTFRFRNIINFPRSVCWYLSFSYFNFYSYNNYRIYIIRKRSNRQQTKIYTIERLPYR  
VCWNRGFVKLRQKTKKPTKGLMGSYKKMITYIYSYIFTITRIIYIYIILLYIKIIIRYNYSILLY  
KNIIYPIINFIFFLIIFFYIMLTHLQMKRTKYCCYSSGYRKIFLYYLFLLGSFSVRGYMDGRRVFIL  
MNSGFKLTLFMNLNYYNINVGYDRIMYSLRVKRDTPTYNTYWFRVEYIYLRVKNIYIYIINIVI  
YWYGLNQVYILSFDKHLFFYLLLLLYCEINNYYNIILHSTYLGILSYLAINDSNQILFSLVWNNDL  
LIHWFFDSKKRVNNFLDQKYYFLQKAYAFHFFDKQLLLIFGCLLVLTITKFFQFLYKFKEYKVIH  
YNILTLMSMRHNQVTLVTCEILVHYLFVYKLLPVLHLCIIVLVWKLTTQSIEMLITGDFVIYIYIQL  
LLSFSCIYTEEVYITDHIELLVLFELLVLLYYWLSVSVMFYLMDRCHYEVLQLLLILLVLYLEGKI  
LLNSFEVVFLIMPLTDFLHYILYCLLYLLFCTLHFMILLVQAILLVFQVITIELHLLHIFYLKILLF  
LYLFLYVLLYSLCMLFGIVIIILWLILCKLLLLLYLNDTYYSMLFDLYLINYVLRCLVLFLLCYY  
LLQIVDLEVYNLDHLVKLSEFLLISFCNVLNTLKIHLYYVNVLYYTLVILLYYLLVTHIYLIYLI  
NLNYFIKLTKYIKIIYIFYLRYYSILGFQFIYIILCITLHLALANLLFPLVWNNDLLIHWFFESKK  
EIRNIFLLLLILFLKNIHFALPFSCIKMNDIKNKYLNYSYVILSYIATHIRSCINTCTCLISCSLCYSC  
KKNYGYAKKIRSCCRLLWTIASICCLKTFIKRICSSYTIYCSFLFRSCNNFNFCIIRLRCTLWSW  
FRDKRHEFRYILHVSCVIFSIRYSISWLKCEIRFSRFSKYSSINLINIKFSYINSNYDNRKFKFNCL  
YISKSYLIYTTFISCVYNIFHRIYSDKSSFFSRGPANLVWSGYMSQIARKPFYFKNKRQLAGNLIP

NKYIIKLFIDTQFNIYIYLFYIMIKDIVNHRCESTKKKHMGTPLLGESELVSGFMTEHAAVVF  
VFFFLAEYGSIVLMCILTSILFIGGYLLFEISYVFTVVNYIFFELFFIDVTFVEVQSLYTDFLNNSIIE  
GLLYGFNLGLKSSLMIFTFIARASFPRIKFDQLMGFCTVLLPINFAIILVPCVLYSFNLLPVNIPLF  
LTHPPALLPQGYSTYEEGNRSRTILVNNTYTKTIYHTRECNYTLFLYSTLLAYYYLYMIIILLNL  
LGYINKKFVNFFHHFLIQNTNF

>LZJ-32-5

ITILKNIKSYIKIIHLYSINLKGIFSILYLVLVLLFSLLQVFLLLGSLLNRWYARLLIKVISFYLLQYLV  
LEGFIILKKCSFIHILTINTKKLKIILLMVKLLIETIKYMLNLIQMLCLVLWQLFLLHFYYSCLIK  
NDVWVLYWYNLYLAINEYDIIYRVCICYSYFIFSHFYICSSSLSRKIYFRVWFPFRAKNTIRYKI  
LYFCFSLFTFRFRNIINFPRSVWCWYLSFSYFNFSYNRYIIRKRSNRQQTIIYTIERLPYR  
VCWNRGFVKLRQKTKKPTKGLMGSYKKMITYIYSYIFTITRIIYIYIILLYIKIIIRYNYSILLY  
KNIIYPIINFIFLFIIFFYIMLTHLQMKRTKYCCYSSGYRKIFLYYLFLLGSFSVRGYMDGRRVFI  
MNSGFKLTLFMNLNNTYINVGYDRIMYSLRVKRDPTTYNTYWFRVEYIYLRVKNIYIYIINIVI  
YWYGLNQVYILSFDKHLFFYLLLLLYCEINNYNIILHSTYLGILSYLAINDSNQILFSLVWNNDL  
LIHWFFDSKKRVNNFLDQKYYFLQKAYAFHFFDKQLLLIFGCLLVLTITKFFQFLYKFKEYKVIH  
YNILTLMSMRHNQVTLVTCEILVHYLFVYKLLPVLHLCIIVLVWKLTTQSIEMITGDFVIYIYIQL  
LLSFSCIYTEEVYITDHIELLVLFELLVLLYYWLSVSVMFYLMDRCHYEVLQLLLILLVLYLEGKI  
LLNSFEVVFLIMPLTDFLHYILYCLLYLLFCTLHFMILLVQAILLVFQVITIELHLLHIIYKILLFL  
YLFYVLLYSLCLMFGIVIIILWLILCKLLLLLYLNDTYYSMLFDLYLINYVLRCLVFLLCYYL  
LQIVDLEVYNLDHLVLKSEFLLLSIFCNVNLTKIHLYYVNVLYYTLVILLLYYLLVTIIVLIYLIN  
LNYFIKLTKYIKIIYIFYLRYYSILGFQFIILCITLHLALANLLFPLVWNNDLIIHWFFESKKEIR  
NIFLLLLILFLKNIHFALPFSCIKMNDIKNKYLNYSYVILSYIATIRSCINTCTCLISCSLCYSCKK  
NYGYAKKIRSCCRLWTIASICCLKTFIRICSSYTIYCSFLFRSCNKNFNCIIRLCYTLWSWFRDK  
RHEFRYLHVSCVIFSIRYSISWLKCEIRFSRFSKYSSINLINIKFSYINSNYDNRFKFKNCLYISK  
SYLIYTTFISCVYNIFHRIYSDKSSFFSRGPANLVWSGYMSQIARKPFYFKNKRQLAGNLIPNKYI  
IKLFIDTQFNIYIYLFYIMIKDIVNHRCESTKKKHMGTPLLGESELVSGFMTEHAAVVFVFFFL  
AEYGSIVLMCILTSILFIGGYLLFEISYVFTVVNYIFFELFFIDVTFVEVQSLYTDFLNNSIIEGLLY  
GFNLGLKSSLMIFTFIARASFPRIKFDQLMGFCTVLLPINFAIILVPCVLYSFNLLPVNIPLFLTHPP  
ALLPQGYSTYEEGNRSRTILVNNTYTKTIYHTRECNYTLFLYSTILAYYYLYMIIILLNLLGYIN  
KLVNFFHHFLIQNTNF

>MT-14-2

ITILKNIKSYIKIIHQYSINLKGIFSILYLVLVLSLSSLLQGFLLLGSLLNRWYARLLIKVISFYLLQYLV  
EEFIILKKCSSIHLTISTKKLKIILLMVKLLIETIKHMNLIIQMSLCLVLWQLLFLHFYYSCLIKND  
VWVLYWYNLYLTINEYDIIYRVCISNSYIIFSIFYICSSSLSRKIYFRVWFPFRAKNTIRYKILYIC  
FSLFTFRFRNIINFSPRCVCWYLSFSYFNFSYNRYIIRKRSNRQQTIIYTSKREIPYVRNRG  
FVKLRQKTKKPTKGLMGSYKKMITYIYSYIFTITRIIYIYIILLYIKIIIRYNYSILLYKNIIYPIIN  
FIIFLIIFFYIMLTHLQMKRTKYCCYSSGYRKIFLYYLFLLGSFSVRGYMDGRRVFILMNSGFKL  
TLFMNLNNTYINVGYDRIMYSLRVKRDPTTYNTYWFRVEYIYLRVKNIYIYIINIVYIYWYGLN  
QVYILSFDKHLFFYLLLLLYCEINNYNIILHSTYLGILSYLATNESNQNFSLVWNNDLIIHWFFDS  
KKRVNNILAKEYYFLQKAYAFHFFDKQLLLIFDCLAVLTITKFNQVLSKFKEYKVIHYNILILSM  
RHNQVILVTYEILVHYLFVYKLLQVLHLCIIVLVWKPILQNIEMITDDFVIYIYIQPQHSFSCIYT  
VEVYIMDHIELLVLYELLVLYLYWPSVSVMFYLMKCHYEVLQLLLILLVLSLEDKILLNLFEE  
VFLIMPLTDFLHYILYLLYLLYCTHFTIQLVLVTLVFQVIMIELHLLHIIYKILLFLYLYLYVHL  
YSLCLMFGIVIIILWLILCKLLLLCLNDIYYLSMLFDLYLINYELLCLVQFLCYLLQIVDLEVY

NLDHLVKLSEFLLISYCNVLNTKIHLYYVNVLFYTLVTLLYYLLVTIIVQIYLINLNYYIKLTKFIK  
IIYIFYLRYYSILGFQFIIYIILCITLHLALGNPLFPLVWNNDLLIHWFFDSKKEIRNNLLLLILFL  
KNIHFALPFSCIKMNDIKNQYLNYSYVILPYFTAIFRSYINTCTCLVSCSLCYSSKKNYGYAKKIR  
SRCRLWTTTSICCLKTFIKRICSSYTIYSSFLFRSSYFNICITRLCCYTIWTWFRIKRYEFRYLLY  
VSCVIFSIRYFISRLKCQICISRFSKYSSINLINIKFSHINSNYDNRKFKFNCMYISKSCLINIAIISC  
IYNIFYRIYSNKSSFFSRGPNILVWSGYMSQIAGKPFYFKNKRQLAGNLIPNKYIIKLFIDTQFNIY  
IYLFYIMIKDIVNHRCESTKKKHMGTPLLGESSELVSGFMTEHA AVVFVFFFLAEYGSIVLMCI  
LTSILFIGGYLLFEISYVFTVVNYIFFELFFIDVTFIEIQSLYTDNFLNNSVIEGLLYGFNLGLKSSLM  
FTFIARASFPRIRFDQLMAFCTVLLPINFAIHLVPCVLYSFNLLPINIPLFLTHPPALLPQGYSTYEE  
GNRSRTILVNNTYTKTIYHTRECNYTLFLYSTLLAYYYLYMIIILLNLLGYINKKFVNFFHHFLI  
QNTNF

>R01-1

ITILKNIKSYIKIIHLYSINLKGIFSILYLVLFFFSLQVFLLLGSLLNRWYARLLIKVISFYLLQYLV  
LEGFIILKKCSFIHLTINTKKLKIILLMVKLLIETIKYMLNLIQMLCLVLWQLFLLHFYYSCLIK  
NDVWVLYWYNLYLAINEYDIIYRVCICYSYFIFSHFYICSSLSRKIYFRVWFPFFRAKNTIRYKI  
LYFCFSLFTFRFRNIINFPRSVCWYLSFSYFNFYSYNNYRIYIIRKRSNRQQTKIIYTIERLPYR  
VCWNRGFVKLRQKTKKPTKGLMGSYKKMITYIYSYIFTITRIIYIYIILLYIKIIIRYNYSILLY  
KNIYPIINFIFLIIFFYIMLTHLQMKRTKYCCYSSGYRKIFLYYFLFGSFSVRGYMDGRRVFIL  
MNSGFKLTLFMNLNYYINVGYDRIMYSLRVKRDTPTYNTYWFRVEYIYLRVKNIYIQYIINIVI  
YWYGLNQVYILSFDKHLFFYLLLLLYCEINNYNIILHSTYLGILSYLAINDSNQILFSLVWNNDL  
LIHWFFDSKKRVNNFLDQKYYFLQKAYAFHFFDKQLLLIFGCLLVLTITKFFQFLYKFKEYKVIH  
YNILTLSMRHNQVTLVTCEILVHYLFVYKLLPVLHLCIIVLVWKLTTQSIEMITGDFVIYIYIQL  
LLSFSCIYTEEVYITDHIELLVLFELLVLLYYWLSVSVMFYLMDRCHYEVLQLLLILLVLYLEGKI  
LLNSFEVVFLIMPLTDFLHYILYCLLYLLFCTLHFMILLVQAILLVFQVITIELHLLHIFYLKILLF  
LYLFLYVLLYSLCLMFIVIIILWLILCKLLLLLYLNDTYYSMLFDLYLINYVLRCLVLFLLCYY  
LLQIVDLEVYNLDHLVKLSEFLLISFCNVLNTLKIHLHYVNVLYYTLVILLYYLLVTIIVLIYLI  
NLNYFIKLTKYIKIIYIFYLRYYSILGFQFIIYIILCITLHLALANLLFPLVWNNDLLIHWFFESKK  
EIRNIFLLLLILFLKNIHFALPFSCIKMNDIKNKYLNYSYVILSYIATHIRSCINTCTCLISCSLCYSC  
KKNYGYAKKIRSCRLWTIASICCLKTFIKRICSSYTIYCSFLFRSCNNFNFCIIRLRCTLWSW  
FRDKRHEFRYILHVSCVIFSIRYSISWLKCEIRFSRFSKYSSINLINIKFSYINSNYDNRKFKFNCL  
YISKSYLIYTTFISCVYNIFHRIYSDKSSFFSRGPANLVWSGYMSQIARKPFYFKNKRQLAGNLIP  
NKYIIKLFIDTQFNIYIYLFYIMIKDIVNHRCESTKKKHMGTPLLGESSELVSGFMTEHA AVVF  
VFFFLAEYGSIVLMCILTSILFIGGYLLFEISYVFTVVNYIFFELFFIDVTFVEVQSLYTDNFLNNSIIE  
GLLYGFNLGLKSSLMIFTFIARASFPRIRFDQLMGFCTVLLPINFAIHLVPCVLYSFNLLPVNIPLF  
LTHPPALLPQGYSTYEEGNRSRTILVNNTYTKTIYHTRECNYTLFLYSTLLAYYYLYMIIILLNL  
LGYNKKFVNFFHHFLIQNTNF

>S1

ITILKNIKSYIKIIHLYSINLKGIFSILYLVLFFFSLQVFLLLGSLLNRWYARLLIKVISFYLLQYLV  
LEGFIILKKCSFIHLTINTKKLKIILLMVKLLIETIKYMLNLIQMLCLVLWQLFLLHFYYSCLIK  
NDVWVLYWYNLYLAINEYDIIYRVCICYSYFIFSHFYICSSLSRKIYFRVWFPFFRAKNTIRYKI  
LYFCFSLFTFRFRNIINFPRSVCWYLSFSYFNFYSYNNYRIYIIRKRSNRQQTKIIYTIERLPYR  
VCWNRGFVKLRQKTKKPTKGLMGSYKKMITYIYSYIFTITRIIYIYIILLYIKIIIRYNYSILLY  
KNIYPIINFIFLIIFFYIMLTHLQMKRTKYCCYSSGYRKIFLYYFLFGSFSVRGYMDGRRVFIL  
MNSGFKLTLFMNLNYYINVGYDRIMYSLRVKRDTPTYNTYWFRVEYIYLRVKNIYIQYIINIVI

YWYGLNQVYILSFDKHLFFYLLLLLYCEINNYNIILHSTYLGILSYLAINDSNQILFSLVWNNDL  
LIHWFFDSKKRVNNFLDQKYYFLQKAYAFHFFDKQLLLIFGCLLVLTITKFFQFLYKFKEYKVIH  
YNILTSMRHNQVTLVTCEILVHYLFVYKLLPVLHLCIIVLVWKLTTQSIEMITGDFVIYIVIQ  
LLSFSCIYTEEVYITDHIELLVLFELLVLLYYWLSVSVMFYLMDRCHYEVLQLLLILLVLYLEGKI  
LLNSFEVVFLLIMPLTDFLHYILYCLLYLLFCTLHFMILLVQAILLVFQVITIELHLLHIIYLKILLFL  
YLFLYVLLYSLCLMFGIVIIILWLILCKLLLLLYLNDTYYSMLFDLYLINYVLRCLVLFLLCYYL  
LQIVDLEVYNLDHLVKLSEFLLLISFCNVLNTLKIHLYYVNVLYYTLVILLYYLLVTIIVLIYLIN  
LNYFIKLT KYIKIIYIFYLRYYSILGFQFIIYIILCITLHLALANLLFPLVWNNDLLIHWFFESKKEI  
RNIFLLLLLILFLKNIHFALPFSCIKMNDIKNKYLNYSYVILSYIATHIRSCINTCTCLISCLCYSCCK  
NYGYAKKIRSCCRLWTIASICCLKTFIKRICSSYTIYCSFLFRSCNNFNFCIIRLCYTLWSWFRD  
KRHEFRYILHVSCVIFSIRYSISWLKCEIRFSRFSKYSSINLINIKFSYINSNYDNRKFKFNCLYIS  
KSYLIYTTFISCVYNIFHRIYSDKSSFFSRGPANLVWSGYMSQIARKPFYFKNKRQLAGNLIPNK  
YIILFIDTQFNIYIYLFYMIKDIVNHRCESTKKKHMGTHLPLLGESELVSGFMTEHAADVVFVF  
FLAEYGSIVLMCILTILFIGGYLLFEISYVFTVYNYIFFELFFIDVTFVEVQSLYTDLNNIIIEGL  
LYGFNLGLKSSLMIFTFIARASFPRIKFDQLMGFCTVLLPINFAIILVPCVLYSFNLLPVNIPLFLT  
HPPALLPQGYSTYEEGNRSRTILVNNYTYTKTIYHTRECNYTLFLYSTLLAYYYLYMIIILLNLLG  
YINKKFVNFFHHFLIQNTNF

>Su-1

ITILKNIKSYIKIIHLYSINLKGIFSILYLVLFFFSLQVFLLLGSLLNRWYARLLIKVISFYLLQYLV  
LEGFIILKKCSFIHLLTINTKKLKIILLMVKLLIETIKYMLNLIQMLCLVLWQLFLLHFYYSCLIK  
NDVWVLYWYNLYLAINEYDIIYRVCICYSYFIFSHFYICSSLSRKIYFRVWFPFFRAKNTIRYKI  
LYFCFSLFTFRFRNIINFPRSVCWYLSFSYFNFYSYNNYRIYIIRKRSNRQQTKIYTIERLPYR  
VCWNRGFKLRQKTKKPTKGLMGSYKKMITYIYSYIIFTITRIIYIYIILLYIKIIIRYNYSILLY  
KNIYPIINFIFLIIFFYIMLTHLQMKRTKYCCYSSGYRKIFLYYFLLLGSFSVRGYMDGRRVFIL  
MNSGFKLTLFMNLNYYNINVGYDRIMYSLRVKRDTPYNTYWFRVEYIYLRVKNIYIYIINIVI  
YWYGLNQVYILSFDKHLFFYLLLLLYCEINNYNIILHSTYLGILSYLAINDSNQILFSLVWNNDL  
LIHWFFDSKKRVNNFLDQKYYFLQKAYAFHFFDKQLLLIFGCLLVLTITKFFQFLYKFKEYKVIH  
YNILTSMRHNQVTLVTCEILVHYLFVYKLLPVLHLCIIVLVWKLTTQSIEMITGDFVIYIVIQ  
LLSFSCIYTEEVYITDHIELLVLFELLVLLYYWLSVSVMFYLMDRCHYEVLQLLLILLVLYLEGKI  
LLNSFEVVFLLIMPLTDFLHYILYCLLYLLFCTLHFMILLVQAILLVFQVITIELHLLHIIYLKILLFL  
YLFLYVLLYSLCLMFGIVIIILWLILCKLLLLLYLNDTYYSMLFDLYLINYVLRCLVLFLLCYYL  
LQIVDLEVYNLDHLVKLSEFLLLISFCNVLNTLKIHLYYVNVLYYTLVILLYYLLVTIIVLIYLIN  
LNYFIKLT KYIKIIYIFYLRYYSILGFQFIIYIILCITLHLALANLLFPLVWNNDLLIHWFFESKKEI  
RNIFLLLLLILFLKNIHFALPFSCIKMNDIKNKYLNYSYVILSYIATHIRSCINTCTCLISCLCYSCCK  
NYGYAKKIRSCCRLWTIASICCLKTFIKRICSSYTIYCSFLFRSCNNFNFCIIRLCYTLWSWFRD  
KRHEFRYILHVSCVIFSIRYSISWLKCEIRFSRFSKYSSINLINIKFSYINSNYDNRKFKFNCLYIS  
KSYLIYTTFISCVYNIFHRIYSDKSSFFSRGPANLVWSGYMSQIARKPFYFKNKRQLAGNLIPNK  
YIILFIDTQFNIYIYLFYMIKDIVNHRCESTKKKHMGTHLPLLGESELVSGFMTEHAADVVFVF  
FLAEYGSIVLMCILTILFIGGYLLFEISYVFTVYNYIFFELFFIDVTFVEVQSLYTDLNNIIIEGL  
LYGFNLGLKSSLMIFTFIARASFPRIKFDQLMGFCTVLLPINFAIILVPCVLYSFNLLPVNIPLFLT  
HPPALLPQGYSTYEEGNRSRTILVNNYTYTKTIYHTRECNYTLFLYSTLLAYYYLYMIIILLNLLG  
YINKKFVNFFHHFLIQNTNF

>T-3

ITILKNIKSYIKIIHLYSINLKGIFSILYLVLFFFSLQVFLLLGSLLNRWYARLLIKVISFYLLQYLV

LEGFIILKKCSFIHLTINTKKLKIILLMVKLLIETIKYMLNLIQMLCLVLWQLFLLHFYYSCLIK  
NDVWVLYWYNLYLAINEYDIIYRVCICYSYFIFSHFYICSSSLSRKIYFRVWFPFRAKNTIRYKI  
LYFCFSLFTFRFRNIINFPRSVCWYLSFSYFNFSYNNYRIYIIRKRSNRQQTKIYTIERLPYR  
VCWNRGFVKLRQKTKKPTKGLMGSYKKMITYIYSYYIFTITRIIYIYIILLYIKIIIRYNYSILLY  
KNIIYPIINFIFLIIFFYIMLTHLQMKRTKYCCYSSGYRKIFLYYLFLLGSFSVRGYMDGRRVFIL  
MNSGFKLTLFMNLNYYINVGYDRIMYSLRVKRDTPYNTYWFRVEYIYLRVKNIYIYIINIVI  
YWYGLNQVYILSFDKHLFFYLLLLLYCEINNYYNIIHSTYLGILSYLAINDSNQILFSLVWNNDL  
LIHWFFDSKKRVNNFLDQKYYFLQKAYAFHFFDKQLLLIFGCLLVLTITKFFQFLYKFKEYKVIH  
YNILTLSMRHNQVTLVTCEILVHYLFVYKLLPVLHLCIIVLVWKLLTQSIEMLITGDFVIYIYIQL  
LLSFSCIYTEEVYITDHIELLVLFELLVLLYYWLSVSVMFYLMDRCHYEVLQLLLILLVLYLEGKI  
LLNSFEVVFLIMPLTDFLHYILYCLLYLLFCTLHFMILLVQAILLVFQVITIELHLLHIFYLKILLF  
LYLFLYVLLYSLCLMFGIVIIILWLILCKLLLLLYLNDTYYSMLFDLYLINYVLRCLVLFLLCYY  
LLQIVDLEVYNLDHLVKLSEFLLISFCNVLNTLKIHLYYVNVLYYTLVILLYYLLVTIIVLIYLI  
NLNYFIKLTKYIKIIYIFYLRYYFSILGFQFIYIILCITLHLALANLLFPLVWNNDDLIIHWFFESKK  
EIRNIFLLLLILFLKNIHFALPFSCIKMNDIKNKYLNYSYVILSYIATHIRSCINTCTCLISCSLCYSC  
KKNYGYAKKIRSCRLWTIASICCLKTFIKRICSSYTIYCSFLFRSCNNFNFCIIRLRCYTLWSW  
FRDKRHEFRYILHVSCVIFSIRYSISWLKCEIRFSRFSKYSSINLINIKFSYINSNYDNRKFKFNCL  
YISKSYLIYTTFISCVYNIFHRIYSDKSSFFSRGPANLVWSGYMSQIARKPFYFKNKRQLAGNLIP  
NKYIIKLFIDTQFNIYIYLFYIMIKDIVNHRCESTKKKHMGTPLGESELVSGFMTEHA AVVF  
VFFFLAEYGSIVLMCILTILFIGGYLLFEISYVFTVVNYIFFELFFIDVTFVEVQSLYTDFLNNSIIE  
GLLYGFNLGLKSSLMFTFIARASFPRIKFDQLMGFCTVLLPINFAIILVPCVLYSFNLLPVNIPLF  
LTHPPALLPQGYSTYEEGNRSRTILVNNYTYTKTIYHTRECNYTLFLYSTLLAYYYLYMIHLLNL  
LGYINKKFVNFFHHFLIQNTNF

>YN010

ITILKNIKSYIKIIHLYSINLKGIFSILYLVLFFFSLQVFLLLGSLLNRWYARLLIKVISFYLLQYLV  
LEGFIILKKCSFIHLTINTKKLKIILLMVKLLIETIKYMLNLIQMLCLVLWQLFLLHFYYSCLIK  
NDVWVLYWYNLYLAINEYDIIYRVCICYSYFIFSHFYICSSSLSRKIYFRVWFPFRAKNTIRYKI  
LYFCFSLFTFRFRNIINFPRSVCWYLSFSYFNFSYNNYRIYIIRKRSNRQQTKIYTIERLPYR  
VCWNRGFVKLRQKTKKPTKGLMGSYKKMITYIYSYYIFTITRIIYIYIILLYIKIIIRYNYSILLY  
KNIIYPIINFIFLIIFFYIMLTHLQMKRTKYCCYSSGYRKIFLYYLFLLGSFSVRGYMDGRRVFIL  
MNSGFKLTLFMNLNYYINVGYDRIMYSLRVKRDTPYNTYWFRVEYIYLRVKNIYIYIINIVI  
YWYGLNQVYILSFDKHLFFYLLLLLYCEINNYYNIIHSTYLGILSYLAINDSNQILFSLVWNNDL  
LIHWFFDSKKRVNNFLDQKYYFLQKAYAFHFFDKQLLLIFGCLLVLTITKFFQFLYKFKEYKVIH  
YNILTLSMRHNQVTLVTCEILVHYLFVYKLLPVLHLCIIVLVWKLLTQSIEMLITGDFVIYIYIQL  
LLSFSCIYTEEVYITDHIELLVLFELLVLLYYWLSVSVMFYLMDRCHYEVLQLLLILLVLYLEGKI  
LLNSFEVVFLIMPLTDFLHYILYCLLYLLFCTLHFMILLVQAILLVFQVITIELHLLHIFYLKILLF  
LYLFLYVLLYSLCLMFGIVIIILWLILCKLLLLLYLNDTYYSMLFDLYLINYVLRCLVLFLLCYY  
LLQIVDLEVYNLDHLVKLSEFLLISFCNVLNTLKIHLYYVNVLYYTLVILLYYLLVTIIVLIYLI  
NLNYFIKLTKYIKIIYIFYLRYYFSILGFQFIYIILCITLHLALANLLFPLVWNNDDLIIHWFFESKK  
EIRNIFLLLLILFLKNIHFALPFSCIKMNDIKNKYLNYSYVILSYIATHIRSCINTCTCLISCSLCYSC  
KKNYGYAKKIRSCRLWTIASICCLKTFIKRICSSYTIYCSFLFRSCNNFNFCIIRLRCYTLWSW  
FRDKRHEFRYILHVSCVIFSIRYSISWLKCEIRFSRFSKYSSINLINIKFSYINSNYDNRKFKFNCL  
YISKSYLIYTTFISCVYNIFHRIYSDKSSFFSRGPANLVWSGYMSQIARKPFYFKNKRQLAGNLIP  
NKYIIKLFIDTQFNIYIYLFYIMIKDIVNHRCESTKKKHMGTPLGESELVSGFMTEHA AVVF

VFFFLAEYGSIVLMCILTSILFIGGYLLFEISYVFTVVNYIFFELFFIDVTFVEVQSLYTDFLNNSIIE  
GLLYGFNLGLKSSLMIFTFIARASFPRIKFDQLMGFCTVLLPINFAIHLVPCVLYSFNLLPVNIPLF  
LTHPPALLPQGYSTYEEGNRSRTILVNNTYTKTIYHTRECNYTLFLYSTLLAYYYLYMIIILLNL  
LGYINKKFVNFFHHFLIQNTNF

>YN029

ITILKNIKSYIKIIHLYSINLKGIFSILYLVLFFFSLQVFLLLGSLLNRWYARLLIKVISFYLLQYLV  
LEGFIHLKKCSFIHLTINTKKLKIILLMVKLLIETIKYMLNLIQMLCLVLWQLFLLHFYYSCLIK  
NDVWVLYWYNLYLAINEYDIIYRVCICYSYFIFSHFYICSSSLSRKIYFRVWFPFFRAKNTIRYKI  
LYFCFSLFTFRFRNIINFPRSVWCWYLSFSYFNFSYNNYRIYIIRKRSNRQQTKIIYTIERLPYR  
VCWNRGFVKLRQKTKKPTKGLMGSYKKMITYIYSYIFTITRIIYIYIILLYIKIIIRYNYSILLY  
KNIYPIINFIFFLIIFFYIMLTHLQMKRTKYCCYSSGYRKIFLYYFLLLGSFSVRGYMDGRRVFIL  
MNSGFKLTLFMNLNNTYINVGYDRIMYSLRVKRDTPYNTYWFRVEYIYLRVKNIYIYIINIVI  
YWYGLNQVYILSFDKHLFFYLLLLLYCEINNYYIILHSTYLGILSYLAINDSNQILFSLVWNNDL  
LIHWFFDSKKRVNNFLDQKYYFLQKAYAFHFFDKQLLLIFGCLLVLTITKFFQFLYKFKEYKVIH  
YNILTLMSMRHNQVTLVTCEILVHYLFVYKLLPVLHLCIIVLVWKLTTQSIEMITGDFVIYIYIQL  
LLSFSCIYTEEVYITDHIELLVLFELLVLLYYWLSVSVMFYLMRCHYEVLQLLLILLVLYLEGKI  
LLNSFEVVFLIMPLTDFLHYILYCLLYLLFCTLHFMILLVQAILLVFQVITIELHLLHIFYLKILLF  
LYLFLYVLLYSLCLMFGIVIIILWLILCKLLLLLYLNDTYYSMLFDLYLINYVLRCLVFLLCYY  
LLQIVDLEVYNLDHLVKLSEFLLISFCNVLNTLKIHLYYVNVLYYTLVILLYYLLVTHIVLIYLI  
NLNYFIKLTKYIKIIYIFYLRYYSILGFQFIYIILCITLHLALANLLFPLVWNNDLLIHWFFESKK  
EIRNIFLLLLILFLKNIHFALPFCIKMNDIKNKYLNYSYVILSYIATHIRSCINTCTCLISCLCYSC  
KKNYGYAKKIRSCCRLLWTIASICCLKTFIKRICSSYTIYCSFLFRSCNNFNFCIIRLRCTLWSW  
FRDKRHEFRYILHVSCVIFSIRYSISWLKCEIRFSRFSKYSSINLINIKFSYINSNYDNRKFKFNCL  
YISKSYLIYTTFISCVYNIFHRIYSDKSSFFSRGPANLVWSGYMSQIARKPFYFKNKRQLAGNLIP  
NKYIIKLFIDTQFNIYIYLFYIMIKDIVNHRCESTKKKHMGTHLPLLGESELVSGFMTEHAAVVF  
VFFFLAEYGSIVLMCILTSILFIGGYLLFEISYVFTVVNYIFFELFFIDVTFVEVQSLYTDFLNNSIIE  
GLLYGFNLGLKSSLMIFTFIARASFPRIKFDQLMGFCTVLLPINFAIHLVPCVLYSFNLLPVNIPLF  
LTHPPALLPQGYSTYEEGNRSRTILVNNTYTKTIYHTRECNYTLFLYSTLLAYYYLYMIIILLNL  
LGYINKKFVNFFHHFLIQNTNF

>YN030

ITILKNIKSYIKIIHLYSINLKGIFSILYLVLFFFSLQVFLLLGSLLNRWYARLLIKVISFYLLQYLV  
LEGFIHLKKCSFIHLTINTKKLKIILLMVKLLIETIKYMLNLIQMLCLVLWQLFLLHFYYSCLIK  
NDVWVLYWYNLYLAINEYDIIYRVCICYSYFIFSHFYICSSSLSRKIYFRVWFPFFRAKNTIRYKI  
LYFCFSLFTFRFRNIINFPRSVWCWYLSFSYFNFSYNNYRIYIIRKRSNRQQTKIIYTIERLPYR  
VCWNRGFVKLRQKTKKPTKGLMGSYKKMITYIYSYIFTITRIIYIYIILLYIKIIIRYNYSILLY  
KNIYPIINFIFFLIIFFYIMLTHLQMKRTKYCCYSSGYRKIFLYYFLLLGSFSVRGYMDGRRVFIL  
MNSGFKLTLFMNLNNTYINVGYDRIMYSLRVKRDTPYNTYWFRVEYIYLRVKNIYIYIINIVI  
YWYGLNQVYILSFDKHLFFYLLLLLYCEINNYYIILHSTYLGILSYLAINDSNQILFSLVWNNDL  
LIHWFFDSKKRVNNFLDQKYYFLQKAYAFHFFDKQLLLIFGCLLVLTITKFFQFLYKFKEYKVIH  
YNILTLMSMRHNQVTLVTCEILVHYLFVYKLLPVLHLCIIVLVWKLTTQSIEMITGDFVIYIYIQL  
LLSFSCIYTEEVYITDHIELLVLFELLVLLYYWLSVSVMFYLMRCHYEVLQLLLILLVLYLEGKI  
LLNSFEVVFLIMPLTDFLHYILYCLLYLLFCTLHFMILLVQAILLVFQVITIELHLLHIFYLKILLF  
LYLFLYVLLYSLCLMFGIVIIILWLILCKLLLLLYLNDTYYSMLFDLYLINYVLRCLVFLLCYY  
LLQIVDLEVYNLDHLVKLSEFLLISFCNVLNTLKIHLYYVNVLYYTLVILLYYLLVTHIVLIYLI

NLNYFIKLT KYIKIIIYIFYLRYYSILGFQFIIYIILCITLHLALANLLFPLVWNNDLLIHWFFESKK  
EIRNIFLLLLILFLKNIHFALPFSCIKMNDIKNKYLNYSYVILSYIATHIRSCINTCTCLISCSLCYSC  
KKNYGYAKKIRSCROLLWTIASICCLKTFIKRICSSYTIYCSFLFRSCNNFNFCIIRLRCYTLWSW  
FRDKRHEFRYILHVSCVIFSIRYSISWLKCEIRFSRFSKYSSINLINIKFSYINSNYDNRKFKFNCL  
YISKSYLIYTTFISCVYNIFHRIYSDKSSFFSRGPANLVWSGYMSQIARKPFYFKNKRQLAGNLIP  
NKYIIKLFIDTQFNIIYLYFIYMIKDIVNHRCESTKKKHMGTLLPLLGESELVSGFMTEHAAVVF  
VFFFLAEYGSIVLMCILTSLFIGGYLLFEISYVFTVVNYIFFELFFIDVTFVEVQSLYTDNFLNNSIIE  
GLLYGFNLGLKSSLMIFTFIARASFPRIKFDQLMGFCTVLLPINFAIIILVPCVLYSFNLLPVNIPLF  
LTHPPALLPQGYSTYEEGNRSRTILVNNYTYTKTIYHTRECNYTLFLYSTLLAYYYLYMIIILLNL  
LGYNKKFVNFFHHFLIQNTNF

>YN040

ITILKNIKSYIKIIHLYSINLKGIFSILYLVLFFFSLQVFLLLGSLLNRWYARLLIKVISFYLLQYLV  
LEGFIILKKCSFIHLTINTKKLKIILLMVKLLIETIKYMLNLIQMLCLVLWQLFLLHFYYSCLIK  
NDVWVLYWYNLYLAINEYDIIYRVCICYSYFIFSHFYICSSSLSRKIYFRVWFPFRAKNTIRYKI  
LYFCFSLFTFRFRNIINFPRSVWCWYLSFSYFNFYSYNNYRIYIIRKRSNRQQTKIIYTIERLPYR  
VCWNRGFVKLRQKTKKPTKGLMGSYKKMITYIYSYIFTITRIIYIYIILLYIKIIIIIRYNYSILLY  
KNIIYPIINFIFLIIFFYIMLTHLQMKRTKYCCYSSGYRKIFLYYFLLLGSFSVRGYMDGRRVFIL  
MNSGFKLTLFMNLNYYINVGYDRIMYSLRVKRDPTTYNTYWFRVEYIYLRVKNIYIYIINIVI  
YWYGLNQVYILSFDKHLFFYLLLLLYCEINNYYNIIHSTYLGILSYLAINDSNQILFSLVWNNDL  
LIHWFFDSKKRVNNFLDQKYYFLQKAYAFHFFDKQLLLIFGCLLVLTITKFFQFLYKFKEYKVIH  
YNILTLSMRHNVTLVTCEILVHYLFVYKLLPVLHLCIIVLVWKLTTQSIEMITGDFVIYIYIQL  
LLSFSCIYTEEVYITDHIELLVLFELLVLLYYWLSVSVMFYLMDRCHYEVLQLLLILLVLYLEGKI  
LLNSFEVVFLIMPLTDFLHYILYCLLYLLFCTLHFMILLVQAILLVFQVITIELHLLHIFYLKILLF  
LYLFLYVLLYSLCMLFGIVIIILWLILCKLLLLLYLNDTYYSMLFDLYLINYVLRCLVLFLLCYY  
LLQIVDLEVYNLDHLVKLSEFLLISFCNVLNTLKIHLYYVNVLYYTLVILLLYYLLVTIIVLIYLI  
NLNYFIKLT KYIKIIIYIFYLRYYSILGFQFIIYIILCITLHLALANLLFPLVWNNDLLIHWFFESKK  
EIRNIFLLLLILFLKNIHFALPFSCIKMNDIKNKYLNYSYVILSYIATHIRSCINTCTCLISCSLCYSC  
KKNYGYAKKIRSCROLLWTIASICCLKTFIKRICSSYTIYCSFLFRSCNNFNFCIIRLRCYTLWSW  
FRDKRHEFRYILHVSCVIFSIRYSISWLKCEIRFSRFSKYSSINLINIKFSYINSNYDNRKFKFNCL  
YISKSYLIYTTFISCVYNIFHRIYSDKSSFFSRGPANLVWSGYMSQIARKPFYFKNKRQLAGNLIP  
NKYIIKLFIDTQFNIIYLYFIYMIKDIVNHRCESTKKKHMGTLLPLLGESELVSGFMTEHAAVVF  
VFFFLAEYGSIVLMCILTSLFIGGYLLFEISYVFTVVNYIFFELFFIDVTFVEVQSLYTDNFLNNSIIE  
GLLYGFNLGLKSSLMIFTFIARASFPRIKFDQLMGFCTVLLPINFAIIILVPCVLYSFNLLPVNIPLF  
LTHPPALLPQGYSTYEEGNRSRTILVNNYTYTKTIYHTRECNYTLFLYSTLLGYYYLYMIIILLNL  
LGYNKKFVNFFHHFLIQNTNF

>YN047

ITILKNIKSYIKIIHLYSINLKGIFSILYLVLFFFSLQVFLLLGSLLNRWYARLLIKVISFYLLQYLV  
LEGFIILKKCSFIHLTINTKKLKIILLMVKLLIETIKYMLNLIQMLCLVLWQLFLLHFYYSCLIK  
NDVWVLYWYNLYLAINEYDIIYRVCICYSYFIFSHFYICSSSLSRKIYFRVWFPFRAKNTIRYKI  
LYFCFSLFTFRFRNIINFPRSVWCWYLSFSYFNFYSYNNYRIYIIRKRSNRQQTKIIYTIERLPYR  
VCWNRGFVKLRQKTKKPTKGLMGSYKKMITYIYSYIFTITRIIYIYIILLYIKIIIIIRYNYSILLY  
KNIIYPIINFIFLIIFFYIMLTHLQMKRTKYCCYSSGYRKIFLYYFLLLGSFSVRGYMDGRRVFIL  
MNSGFKLTLFMNLNYYINVGYDRIMYSLRVKRDPTTYNTYWFRVEYIYLRVKNIYIYIINIVI  
YWYGLNQVYILSFDKHLFFYLLLLLYCEINNYYNIIHSTYLGILSYLAINDSNQILFSLVWNNDL

LIHWFFDSKKRVNNFLDQKYYFLQKAYAFHFFDKQLLLIFGCLLVLTITKFFQFLYKFKEYKVIH  
YNILTLSMRHNQVTLVTCEILVHYLFVYKLLPVLHLCIIVLVWKLLTQSIEMLITGDFVIYIVIQL  
LLSFSCIYTEEVYITDHIELLVLFELLVLLYYWLSVSVMFYLMDRCHYEVLQLLLILLVLYLEGKI  
LLNSFEVVFLIMPLTDFLHYILYCLLYLLFCTLHFMILLVQAILLVFQVITIELHLLHIFYLKILLF  
LYLFLYVLLYSLCCLMFIVIIIWLILCKLLLLLYLNDTYYSMLFDLYLINYVLRCLVLFLLCYY  
LLQIVDLEVYNLDHLVKLSEFLLISFCNVLNTLKIHLYYVNVLYYTLVILLYYLLVTIIVLIYLI  
NLNYFIKLTKEYIKIIYIFYLRYYSILGFQFIYIILCITLHLALANLLFPLVWNNDDLHWWFFDSKK  
EIRNIFLLLLILFLKNIHFALPFSCIKMNDIKNKYLNYSYVILSYIATHIRSCINTCTCLISCSLCYSC  
KKNYGYAKKIRSCCRLLWTIASICCLKTFIKRICSSYTIYCSFLFRSCNNFNFCIIRLRCTLWSW  
FRDKRHEFRYILHVSCVIFSIRYSISWLKCEIRFSRFSKYSSINLINIKFSYINSNYDNRKFKFNCL  
YISKSYLIYTTFISCVYNIFHRIYSDKSSFFSRGPANLVWSGYMSQIARKPFYFKNKRQLAGNLIP  
NKYIIKLFIDTQFNIYIYLFYIMIKDIVNHRCESTKKKHMGTPLGESELVSGFMTEHA AVVF  
VFFFLAEYGSIVLMCILTSILFIGGYLLFEISYVFTVVNYIFFELFFIDVTFVEVQSLYTDFLNNIIIE  
GLLYGFNLGLKSSLMIFTFIARASFPRIREFDQLMGFCTVLLPINFAIIILVPCVLYSFNLLPVNIPLF  
LTHPPALLPQGYSTYEEGNRSRTILVNNYTYTKTIYHTRECNYTLFLYSTLLAYYYLYMIIILLNL  
LGYINKKFVNFFHHFLIQNTNF

>YN084

ITILKNIKSYIKIIHLYSINLKGIFSILYLVLFFFSLQVFLLLGSLLNRWYARLLIKVISFYLLQYLV  
LEGFIILKKCSFIHILTINTKKLKIILLMVKLLIETIKYMLNLIQMLCLVLWQLFLLHFYYSCLIK  
NDVWVLYWYNLYLAINEYDIIYRVCICYSYFIFSHFYICSSSLSRKIYFRVWFPFRAKNTIRYKI  
LYFCFSLFTFRFRNIINFPRSVCWYLSFSYFNFSYNNYRIYIIRKRSNRQQTKIYTIERLPYR  
VCWNRGFVKLRQKTKKPTKGLMGSYKKMITYIYSYIFTITRIIYIYIILLYIKIIIRYNYSILLY  
KNIIYPIINFIFLIIFFYIMLTHLQMKRTKYCCYSSGYRKIFLYYFLFGSFSVRGYMDGRRVFIL  
MNSGFKLTLMFNLNYYNINVGYDRIMYSLRVKRDTPTYNTYWFRVEYIYLRVKNIYIYIINIVI  
YWYGLNQVYILSFDKHLFFYLLLLLYCEINNYYNIILHSTYLGILSYLAINDSNQILFSLVWNNDL  
LIHWFFDSKKRVNNFLDQKYYFLQKAYAFHFFDKQLLLIFGCLLVLTITKFFQFLYKFKEYKVIH  
YNILTLSMRHNQVTLVTCEILVHYLFVYKLLPVLHLCIIVLVWKLLTQSIEMLITGDFVIYIVIQL  
LLSFSCIYTEEVYITDHIELLVLFELLVLLYYWLSVSVMFYLMDRCHYEVLQLLLILLVLYLEGKI  
LLNSFEVVFLIMPLTDFLHYILYCLLYLLFCTLHFMILLVQAILLVFQVITIELHLLHIFYLKILLF  
LYLFLYVLLYSLCCLMFIVIIIWLILCKLLLLLYLNDTYYSMLFDLYLINYVLRCLVLFLLCYY  
LLQIVDLEVYNLDHLVKLSEFLLISFCNVLNTLKIHLYYVNVLYYTLVILLYYLLVTIIVLIYLI  
NLNYFIKLTKEYIKIIYIFYLRYYSILGFQFIYIILCITLHLALANLLFPLVWNNDDLHWWFFESKK  
EIRNIFLLLLILFLKNIHFALPFSCIKMNDIKNKYLNYSYVILSYIATHIRSCINTCTCLISCSLCYSC  
KKNYGYAKKIRSCCRLLWTIASICCLKTFIKRICSSYTIYCSFLFRSCNNFNFCIIRLRCTLWSW  
FRDKRHEFRYILHVSCVIFSIRYSISWLKCEIRFSRFSKYSSINLINIKFSYINSNYDNRKFKFNCL  
YISKSYLIYTTFISCVYNIFHRIYSDKSSFFSRGPANLVWSGYMSQIARKPFYFKNKRQLAGNLIP  
NKYIIKLFIDTQFNIYIYLFYIMIKDIVNHRCESTKKKHMGTPLGESELVSGFMTEHA AVVF  
VFFFLAEYGSIVLMCILTSILFIGGYLLFEISYVFTVVNYIFFELFFIDVTFVEVQSLYTDFLNNIIIE  
GLLYGFNLGLKSSLMIFTFIARASFPRIREFDQLMGFCTVLLPINFAIIILVPCVLYSFNLLPVNIPLF  
LTHPPALLPQGYSTYEEGNRSRTILVNNYTYTKTIYHTRECNYTLFLYSTLLAYYYLYMIIILLNL  
LGYINKKFVNFFHHFLIQNTNF

>YN093

ISILKNIKSYIKIIHLYSINLKGIFSILYLVLFFFSLQVFLLLGSLLNRWYARLLIKVISFYLLQYLV  
LEGFIILKKCSFIHILTINTKKLKIILLMVKLLIETIKYMLNLIQMLCLVLWQLFLLHFYYSCLIK

NDVWVLYWYNLYLAINEYDIIYRVCICYSYFIFSHFYICSSSLSRKIYFRVWFPFFRAKNTIRYKI  
LYFCFSLFTFRFRNIINFPRSVCWYLSFSYFNFYSYNNYRIYIIRKRSNRQQTKIYTIERLPYR  
VCWNRGFVKLRQKTKKPTKGLMGSYKKMITYIYSYIYFTITRIIYIYIILLYIKIIIRYNYSILLY  
KNIHYPIINFIFFLIIFFYIMLTHLQMKRTKYCCYSSGYRKIFLYYFLLLGSFSVRGYMDGRRVFIL  
MNSGFKLTLFMNLNYYINVGYDRIMYSLRVKRDTPYNTYWFRVEYIYLRVKNIYIYIINIVI  
YWYGLNQVYILSFDKHLFFYLLLLLYCEINNYYNIILHSTYLGILSYLAINDSNQILFSLVWNNDL  
LIHWFFDSKKRVNNFLDQKYYFLQKAYAFHFFDKQLLLIFGCLLVLTITKFFQFLYKFKEYKVIH  
YNILTLSMRHNQVTLVTCEILVHYLFVYKLLPVLHLCIIVLVWKLTTQSIEMITGDFVIYIYIQL  
LLSFSCIYTEEVYITDHIELLVLFELLVLLYYWLSVSVMFYLMDRCHYEVLQLLLILLVLYLEGKI  
LLNSFEVVFLIMPLTDFLHYILYCLLYLLFCTLHFMILLVQAILLVFQVITIELHLLHIFYLKILLF  
LYLFLYVLLYSLCLMFGIVIIILWLILCKLLLLLYLNDTYYSMLFDLYLINYVLRCLVFLLCYY  
LLQIVDLEVYNLDHLVKLSEFLLISFCNVLNTLKIHLYYVNVLYYTLVILLYYLLVTHIYLIYLI  
NLNYFIKLTKYIKIIYIFYLRYYSILGFQFIYIILCITLHLALANLLFPLVWNNDLLIHWFFESKK  
EIRNIFLLLLILFLKNIHFALPFSCIKMNDIKNKYLNYSYVILSYIATHIRSCINTCTCLISCSLCYSC  
KKNYGYAKKIRSCCRLLWTIASICCLKTFIKRICSSYTIYCSFLFRSCNNFNFCIIRLRCTLWSW  
FRDKRHEFRYILHVSCVIFSIRYSISWLKCEIRFSRFSKYSSINLINIKFSYINSNYDNRKFKFNCL  
YISKSYLIYTTFISCVYNIFHRIYSDKSSFFSRGPANLVWSGYMSQIARKPFYFKNKRQLAGNLIP  
NKYIIKLFIDTQFNIYIYLFYIMIKDIVNHRCESTKKKHMGTPLGSELVSGFMTEHAAVVF  
VFFFLAEYGSIVLMCILTSILFIGGYLLFEISYVFTVVNYIFFELFFIDVTFVEVQSLYTDFLNNIIE  
GLLYGFNLGLKSSLMIFTFIARASFPRIKFDQLMGFCTVLLPINFAIIILVPCVLYSFNLLPVNIPLF  
LTHPPALLPQGYSTYEEGNRSRTILVNNTYTKTIYHTRECNYTLFLYSTLLGYYYLYMIIILLNL  
LGYINKKFVNFFHHFLIQNTNF

>YN094

ITILKNIKSYIKIIHLYSINLKGIFSILYLVLFFFSLQVFLLLGSLLNRWYARLLIKVISFYLLQYLV  
LEGFIIILKKCSFIHLTINTKKLKIILLMVKLLIETIKYMLNLIQMLCLVLWQLFLLHFYYSCLIK  
NDVWVLYWYNLYLAINEYDIIYRVCICYSYFIFSHFYICSSSLSRKIYFRVWFPFFRAKNTIRYKI  
LYFCFSLFTFRFRNIINFPRSVCWYLSFSYFNFYSYNNYRIYIIRKRSNRQQTKIYTIERLPYR  
VCWNRGFVKLRQKTKKPTKGLMGSYKKMITYIYSYIYFTITRIIYIYIILLYIKIIIRYNYSILLY  
KNIHYPIINFIFFLIIFFYIMLTHLQMKRTKYCCYSSGYRKIFLYYFLLLGSFSVRGYMDGRRVFIL  
MNSGFKLTLFMNLNYYINVGYDRIMYSLRVKRDTPYNTYWFRVEYIYLRVKNIYIYIINIVI  
YWYGLNQVYILSFDKHLFFYLLLLLYCEINNYYNIILHSTYLGILSYLAINDSNQILFSLVWNNDL  
LIHWFFDSKKRVNNFLDQKYYFLQKAYAFHFFDKQLLLIFGCLLVLTITKFFQFLYKFKEYKVIH  
YNILTLSMRHNQVTLVTCEILVHYLFVYKLLPVLHLCIIVLVWKLTTQSIEMITGDFVIYIYIQL  
LLSFSCIYTEEVYITDHIELLVLFELLVLLYYWLSVSVMFYLMDRCHYEVLQLLLILLVLYLEGKI  
LLNSFEVVFLIMPLTDFLHYILYCLLYLLFCTLHFMILLVQAILLVFQVITIELHLLHIFYLKILLF  
LYLFLYVLLYSLCLMFGIVIIILWLILCKLLLLLYLNDTYYSMLFDLYLINYVLRCLVFLLCYY  
LLQIVDLEVYNLDHLVKLSEFLLISFCNVLNTLKIHLYYVNVLYYTLVILLYYLLVTHIYLIYLI  
NLNYFIKLTKYIKIIYIFYLRYYSILGFQFIYIILCITLHLALANLLFPLVWNNDLLIHWFFESKK  
EIRNIFLLLLILFLKNIHFALPFSCIKMNDIKNKYLNYSYVILSYIATHIRSCINTCTCLISCSLCYSC  
KKNYGYAKKIRSCCRLLWTIASICCLKTFIKRICSSYTIYCSFLFRSCNNFNFCIIRLRCTLWSW  
FRDKRHEFRYILHVSCVIFSIRYSISWLKCEIRFSRFSKYSSINLINIKFSYINSNYDNRKFKFNCL  
YISKSYLIYTTFISCVYNIFHRIYSDKSSFFSRGPANLVWSGYMSQIARKPFYFKNKRQLAGNLIP  
NKYIIKLFIDTQFNIYIYLFYIMIKDIVNHRCESTKKKHMGTPLGSELVSGFMTEHAAVVF  
VFFFLAEYGSIVLMCILTSILFIGGYLLFEISYVFTVVNYIFFELFFIDVTFVEVQSLYTDFLNNIIE

GLLYGFNLGLKSSLMIFTFIARASFPRIKFDQLMGFCTVLLPINFAIHLVPCVLYSFNLLPVNIPLF  
LTHPPALLPQGYSTYEEGNRSRTILVNNTYTKTIYHTRECNYTLFLYSTLLGYYYLYMIHLLNL  
LGYINKKFVNFFHHFLIQNTNF

>YN097

ITILKNIKSYIKIIHLYSINLKGIFSILYLVLFFFSLQVFLLLGSLLNRWYARLLIKVISFYLLQYLV  
LEGFIILKKCSFIHLTINTKKLKIILLMVKLLIETIKYMLNLIQMLCLVLWQLFLLHFYYSCLIK  
NDVWVLYWYNLYLAINEYDIIYRVCICYSYFIFSHFYICSSSLSRKIYFRVWFPFFRAKNTIRYKI  
LYFCFSLFTFRFRNIINFPRSVWCWYLSFSYFNFSYNRYRIIRKRSNRQQTKIYTIERLPYR  
VCWNRGFVKLRQKTKKPTKGLMGSYKKMITYIYSYIFTITRIIYIYIILLYIKIIIRYNYSILLY  
KNIIYPIINFIFLIIFFYIMLTHLQMKRTKYCCYSSGYRKIFLYYFLLLGSFSVRGYMDGRRVFIL  
MNSGFKLTLFMNLNRYNINVGYDRIMYSLRVKRDPTTYNTYWFRVEYIYLRVKNIYIYIINIVI  
YWYGLNQVYILSFDKHLFFYLLLLLYCEINNYNIILHSTYLGILSYLAINDSNQILFSLVWNNDL  
LIHWFFDSKKRVNFDQKYYFLQKAYAFHFFDKQLLLIFGCLLVLTITKFFQFLYKFKEYKVIH  
YNILTLSMRHNQVTLVTCEILVHYLFVYKLLPVLHLCIIVLVWKLTTQSIEMITGDFVIYIYIQL  
LLSFSCIYTEEVYITDHIELLVLFELLVLLYYWLSVSVMFYLMDRCHYEVLQLLLILLVLYLEGKI  
LLNSFEVVFLIMPLTDFLHYILYCLLYLLFCTLHFMILLVQAILLVFQVITIELHLLHIFYLKILLF  
LYLFLYVLLYSLCMLFGIVIIILWLILCKLLLLLYLNDTYYSMLFDLYLINYVLRCLVLFLLCY  
LLQIVDLEVYNLDHLVKLSEFLLISFCNVLNTLKIHLIYVNVLYYTLVILLLYYLLVTIIVLIYLI  
NLNYFIKLTKYIKIIYIFYLRYYSILGFQFIYIILCITLHLALANLLFPLVWNNDLLIHWFFESKK  
EIRNIFLLLLILFLKNIHFALPFCIKMNDIKNKYLNYSYVILSYIATHIRSCINTCTCLISCSLCYSC  
KKNYGYAKKIRSCRLWTIASICCLKTFIKRICSSYTIYCSFLFRSCNNFNFCIIRLCYTLWSW  
FRDKRHEFRYILHVSCVIFSIRYSISWLKCEIRFSRFSKYSSINLINIKFSYINSNYDNRKFKFNCL  
YISKSYLIYTTFISCVYNIFHRIYSDKSSFFSRGPANLVWSGYMSQIARKPFYFKNKRQLAGNLIP  
NKYIIKLFIDTQFNIYIYLFYMIKDIVNHRCESTKKKHMGTPLGESELVSGFMTEHAAVVF  
VFFFLAEYGSIVLMCILTILFIGGYLLFEISYVFTVVNYIFFELFFIDVTFVEVQSLYTDFLNNIIE  
GLLYGFNLGLKSSLMIFTFIARASFPRIKFDQLMGFCTVLLPINFAIHLVPCVLYSFNLLPVNIPLF  
LTHPPALLPQGYSTYEEGNRSRTILVNNTYTKTIYHTRECNYTLFLYSTLLAYYYLYMIHLLNL  
LGYINKKFVNFFHHFLIQNTNF

>YN137

ITILKNIKSYIKIIHLYSINLKGIFSILYLVLFFFSLQVFLLLGSLLNRWYARLLIKVISFYLLQYLV  
LEGFIILKKCSFIHLTINTKKLKIILLMVKLLIETIKYMLNLIQMLCLVLWQLFLLHFYYSCLIK  
NDVWVLYWYNLYLAINEYDIIYRVCICYSYFIFSHFYICSSSLSRKIYFRVWFPFFRAKNTIRYKI  
LYFCFSLFTFRFRNIINFPRSVWCWYLSFSYFNFSYNRYRIIRKRSNRQQTKIYTIERLPYR  
VCWNRGFVKLRQKTKKPTKGLMGSYKKMITYIYSYIFTITRIIYIYIILLYIKIIIRYNYSILLY  
KNIIYPIINFIFLIIFFYIMLTHLQMKRTKYCCYSSGYRKIFLYYFLLLGSFSVRGYMDGRRVFIL  
MNSGFKLTLFMNLNRYNINVGYDRIMYSLRVKRDPTTYNTYWFRVEYIYLRVKNIYIYIINIVI  
YWYGLNQVYILSFDKHLFFYLLLLLYCEINNYNIILHSTYLGILSYLAINDSNQILFSLVWNNDL  
LIHWFFDSKKRVNFDQKYYFLQKAYAFHFFDKQLLLIFGCLLVLTITKFFQFLYKFKEYKVIH  
YNILTLSMRHNQVTLVTCEILVHYLFVYKLLPVLHLCIIVLVWKLTTQSIEMITGDFVIYIYIQL  
LLSFSCIYTEEVYITDHIELLVLFELLVLLYYWLSVSVMFYLMDRCHYEVLQLLLILLVLYLEGKI  
LLNSFEVVFLIMPLTDFLHYILYCLLYLLFCTLHFMILLVQAILLVFQVITIELHLLHIFYLKILLF  
LYLFLYVLLYSLCMLFGIVIIILWLILCKLLLLLYLNDTYYSMLFDLYLINYVLRCLVLFLLCY  
LLQIVDLEVYNLDHLVKLSEFLLISFCNVLNTLKIHLIYVNVLYYTLVILLLYYLLVTIIVLIYLI  
NLNYFIKLTKYIKIIYIFYLRYYSILGFQFIYIILCITLHLALANLLFPLVWNNDLLIHWFFESKK

EIRNIFLLLLILFLKNIHFALPFSCIKMNDIKNKYLNYSYVILSYIATHIRSCINTCTCLISCSLCYSC  
KKNYGYAKKIRSCCRLWLTIASICCLKTFIKRICSSYTIYCSFLFRSCNNFNFCIIRLRCTLWSW  
FRDKRHEFRYILHVSCVIFSIRYSISWLKCEIRFSRFSKYSSINLINIKFSYINSNYDNRKFKFNCL  
YISKSYLIYTTFISCVYNIFHRIYSDKSSFFSRGPANLVWSGYMSQIARKPFYFKNKRQLAGNLIP  
NKYIIKLFIDTQFNIYIYLFYIMIKDIVNHRCESTKKKHMGTPLLGESELVSGFMTEHA AVVF  
VFFFLAEYGSIVLMCILTILFIGGYLLFEISYVFTVVNYIFFELFFIDVTFVEVQSLYTDFLNNSIIE  
GLLYGFNLGLKSSLMIFTFIARASFPRIKFDQLMGFCTVLLPINFAIHLVPCVLYSFNLLPVNIPLF  
LTHPPALLPQGYSTYEEGNRSRTILVNNTYTKTIYHTRECNYTLFLYSTLLAYYYLYMIILLNL  
LGYINKKFVNFFHHFLIQNTNY

>YN153

ITILKNIKSYIKIIHLYSINLKGIFSILYLVLFFFSLQVFLLLGSLLNRWYARLLIKVISFYLLQYLV  
LEGFIILKKCSFIHILTINTKKLKIILLMVKLLIETIKYMLNLIQMLCLVLWQLFLLHFYYSCLIK  
NDVWVLYWYNLYLAINEYDIIYRVCICYSYFIFSHFYICSSSLRKIYFRVWFPFRAKNTIRYKI  
LYFCFSLFTFRFRNIINFPRSVCWYLSFSYFNFSYNNYRIYIIRKRSNRQQTKIYTIERLPYR  
VCWNRGFVKLRQKTKKPTKGLMGSYKKMITYIYSYIFTITRIIYIYIILLYIKIIIRYNYSILLY  
KNIIYPIINFIFFLIIFFYIMLTHLQMKRTKYCCYSSGYRKIFLYYFLLGFSFSVRGYMDGRRVFIL  
MNSGFKLTLFMNLNNTYINVGYDRIMYSLRVKRDPTTYNTYWFRVEYIYLRVKNIYIYIINIVI  
YWYGLNQVYILSFDKHLFFYLLLLLYCEINNYYNIHSTYLGILSYLAINDSNQILFSLVWNNDL  
LIHWFFDSKKRVNNFLDQKYYFLQKAYAFHFFDKQLLLIFGCLLVLTITKFFQFLYKFKEYKVIH  
YNILTLMSMRHNQVTLVTCEILVHYLFVYKLLPVLHLCIIVLVWKLTTQSIEMITGDFVIYIYIQL  
LLSFSCIYTEEVYITDHIELLVLFELLVLLYYWLSVSVMFYLMDRCHYEVLQLLLILLVLYLEGKI  
LLNSFEVVFLIMPLTDFLHYILYCLLYLLFCTLHFMILLVQAILLVFQVITIELHLLHIFYLKILLF  
LYLFLYVLLYSLCLMFIVIIILWLILCKLLLLLYLNDTYYSMLFDLYLINYVLRCLVFLLCYY  
LLQIVDLEVYNLDHLVKLSEFLLISFCNVLNTLKIHLYYVNVLYYTLVILLYYLLVTHIYLIYLI  
NLNYFIKLTKYIKIIYIFYLRYYSILGFQFIYIILCITLHLALANLLFPLVWNNDLLIHWFFESKK  
EIRNIFLLLLILFLKNIHFALPFSCIKMNDIKNKYLNYSYVILSYIATHIRSCINTCTCLISCSLCYSC  
KKNYGYAKKIRSCCRLWLTIASICCLKTFIKRICSSYTIYCSFLFRSCNNFNFCIIRLRCTLWSW  
FRDKRHEFRYILHVSCVIFSIRYSISWLKCEIRFSRFSKYSSINLINIKFSYINSNYDNRKFKFNCL  
YISKSYLIYTTFISCVYNIFHRIYSDKSSFFSRGPANLVWSGYMSQIARKPFYFKNKRQLAGNLIP  
NKYIIKLFIDTQFNIYIYLFYIMIKDIVNHRCESTKKKHMGTPLLGESELVSGFMTEHA AVVF  
VFFFLAEYGSIVLMCILTILFIGGYLLFEISYVFTVVNYIFFELFFIDVTFVEVQSLYTDFLNNSIIE  
GLLYGFNLGLKSSLMIFTFIARASFPRIKFDQLMGFCTVLLPINFAIHLVPCVLYSFNLLPVNIPLF  
LTHPPALLPQGYSTYEEGNRSRTILVNNTYTKTIYHTRECNYTLFLYSTLLAYYYLYMIILLNL  
LGYINKKFVNFFHHFLIQNTNY

>YN154

ITILKNIKSYIKIIHLYSINLKGIFSILYLVLFFFSLQVFLLLGSLLNRWYARLLIKVISFYLLQYLV  
LEGFIILKKCSFIHILTINTKKLKIILLMVKLLIETIKYMLNLIQMLCLVLWQLFLLHFYYSCLIK  
NDVWVLYWYNLYLAINEYDIIYRVCICYSYFIFSHFYICSSSLRKIYFRVWFPFRAKNTIRYKI  
LYFCFSLFTFRFRNIINFPRSVCWYLSFSYFNFSYNNYRIYIIRKRSNRQQTKIYTIERLPYR  
VCWNRGFVKLRQKTKKPTKGLMGSYKKMITYIYSYIFTITRIIYIYIILLYIKIIIRYNYSILLY  
KNIIYPIINFIFFLIIFFYIMLTHLQMKRTKYCCYSSGYRKIFLYYFLLGFSFSVRGYMDGRRVFIL  
MNSGFKLTLFMNLNNTYINVGYDRIMYSLRVKRDPTTYNTYWFRVEYIYLRVKNIYIYIINIVI  
YWYGLNQVYILSFDKHLFFYLLLLLYCEINNYYNIHSTYLGILSYLAINDSNQILFSLVWNNDL  
LIHWFFDSKKRVNNFLDQKYYFLQKAYAFHFFDKQLLLIFGCLLVLTITKFFQFLYKFKEYKVIH

YNILTLSMRHNQVTLVTCEILVHYLFVYKLLPVLHLCIIVLVWKLTTQSIEMLITGDFVIYIVIQL  
LLSFSCIYTEEVYITDHIELLVLFELLVLLYYWLSVSVMFYLMDRCHYEVLQLLLILLVLYLEGKI  
LLNSFEVVFLIMPLTDFLHYILYCLLYLLFCTLHFMILLVQAILLVFQVITIELHLLHIFYLKILLF  
LYLFLYVLLYSLCLMFGIVIIILWLILCKLLLLLYLNDTYYSMLFDLYLINYVLRCLVLFLLCYY  
LLQIVDLEVYNLDHLVKLSEFLLISFCNVLNTLKIHLYYVNVLYYTLVILLYYLLVTHIVLIYLI  
NLNYFIKLTKYIKIIYIFYLRYYSILGFQFIIYIILCITLHLALANLLFPLVWNNDDLIIHWFESKK  
EIRNIFLLLLLILFLKNIHFALPFSCIKMNDIKNKYLNYSYVILSYIATHIRSCINTCTCLISCSLCYSC  
KKNYGYAKKIRSCCRLLWTIASICCLKTFIKRICSSYTIYCSFLFRSCNNFNFCIIRLRCYTLWSW  
FRDKRHEFRYILHVSCVIFSIRYSISWLKCEIRFSRFSKYSSINLINIKFSYINSNYDNRKFKFNCL  
YISKSYLIYTTFISCVYNIFHRIYSDKSSFFSRGPANLVWSGYMSQIARKPFYFKNKRQLAGNLIP  
NKYIIKLFIDTQFNIIYILFIYMIKDIVNHRCESTKKKHMGTPLGESELVSGFMTEHAAVVF  
VFFFLAEYGSIVLMCILTSILFIGGYLLFEISYVFTVVNYIFFELFFIDVTFVEVQSLYTDFLNNSIIE  
GLLYGFNLGLKSSLMIFTFIARASFPRIKFDQLMGFCTVLLPINFAIIILVPCVLYSFNLLPVNIPLF  
LTHPPALLPQGYSTYEEGNRSRTILVNNTYTKTIYHTRECNYTLFLYSTLLAYYYLYMIIILLNL  
LGYINKKFVNFFHHFLIQNTNF

>YN157

ITILKNIKSYIKIIHLYSINLKGIFSILYLVLFFFSLQVFLLLGSLLNRWYARLLIKVISFYLLQYLV  
LEGFIIILKKCSFIHLTINTKKLKIILLMVKLLIETIKYMLNLIQMLCLVLWQLFLLHFFYYSCLIK  
NDVWVLYWYNLYLAINEYDIIYRVCICYSYFIFSHFYICSSSLSRKIYFRVWFPFRAKNTIRYKI  
LYFCFSLFTFRFRNIINFPRSVCWYLSFSYFNFSYNRYIIRKRSNRQQTKIYTIERLPYR  
VCWNRGFKLRQKTKKPTKGLMGSYKKMITYIYSYIFTITRIIYIYIILLYIKIIIRYNYSILLY  
KNIIYPIINFIFFLIIFFYIMLTHLQMKRTKYCCYSSGYRKIFLYYFLFGSFSVRGYMDGRRVFIL  
MNSGFKLTLFMNLNYYINVGYDRIMYSLRVKRDPTTYNTYWFRVEYIYLRVKNIYIYIINIVI  
YWYGLNQVYILSFDKHLFFYLLLLLYCEINNYYNIIHSTYLGILSYLAINDSNQILFSLVWNNDL  
LIHWFDFSCKRVNNFLDQKYYFLQKAYAFHFFDKQLLLIFGCLLVLTITKFFQFLYKFKEYKVIH  
YNILTLSMRHNQVTLVTCEILVHYLFVYKLLPVLHLCIIVLVWKLTTQSIEMLITGDFVIYIVIQL  
LLSFSCIYTEEVYITDHIELLVLFELLVLLYYWLSVSVMFYLMDRCHYEVLQLLLILLVLYLEGKI  
LLNSFEVVFLIMPLTDFLHYILYCLLYLLFCTLHFMILLVQAILLVFQVITIELHLLHIFYLKILLF  
LYLFLYVLLYSLCLMFGIVIIILWLILCKLLLLLYLNDTYYSMLFDLYLINYVLRCLVLFLLCYY  
LLQIVDLEVYNLDHLVKLSEFLLISFCNVLNTLKIHLYYVNVLYYTLVILLYYLLVTHIVLIYLI  
NLNYFIKLTKYIKIIYIFYLRYYSILGFQFIIYIILCITLHLALANLLFPLVWNNDDLIIHWFESKK  
EIRNIFLLLLLILFLKNIHFALPFSCIKMNDIKNKYLNYSYVILSYIATHIRSCINTCTCLISCSLCYSC  
KKNYGYAKKIRSCCRLLWTIASICCLKTFIKRICSSYTIYCSFLFRSCNNFNFCIIRLRCYTLWSW  
FRDKRHEFRYILHVSCVIFSIRYSISWLKCEIRFSRFSKYSSINLINIKFSYINSNYDNRKFKFNCL  
YISKSYLIYTTFISCVYNIFHRIYSDKSSFFSRGPANLVWSGYMSQIARKPFYFKNKRQLAGNLIP  
NKYIIKLFIDTQFNIIYILFIYMIKDIVNHRCESTKKKHMGTPLGESELVSGFMTEHAAVVF  
VFFFLAEYGSIVLMCILTSILFIGGYLLFEISYVFTVVNYIFFELFFIDVTFVEVQSLYTDFLNNSIIE  
GLLYGFNLGLKSSLMIFTFIARASFPRIKFDQLMGFCTVLLPINFAIIILVPCVLYSFNLLPVNIPLF  
LTHPPALLPQGYSTYEEGNRSRTILVNNTYTKTIYHTRECNYTLFLYSTLLAYYYLYMIIILLNL  
LGYINKKFVNFFHHFLIQNTNF

>YN158

ITILKNIKSYIKIIHLYSINLKGIFSILYLVLFFFSLQVFLLLGSLLNRWYARLLIKVISFYLLQYLV  
LEGFIIILKKCSFIHLTINTKKLKIILLMVKLLIETIKYMLNLIQMLCLVLWQLFLLHFFYYSCLIK  
NDVWVLYWYNLYLAINEYDIIYRVCICYSYFIFSHFYICSSSLSRKIYFRVWFPFRAKNTIRYKI

LYFCFSLFTFRFRNIINFPRSVWCWYLSFSYFNFYSYNNYRIYIIRKRSNRQQTKIYTIERLPYR  
VCWNRGFVKLRQKTKKPTKGLMGSYKKMITYIYSYYIFTITRIIYIYIILLYIKIIIRYNYSILLY  
KNIYPIINFIFLIIFFYIMLTHLQMKRTKYCCYSSGYRKIFLYYFLGGSFSVRGYMDGRRVFIL  
MNSGFKLTLFMNLNYYINVGYDRIMYSLRVKRDTPTYNTYWFRVEYIYLRVKNIYIQYIINIVI  
YWYGLNQVYILSFDKHLFFYLLLLLYCEINNYNIILHSTYLGILSYLAINDSNQILFSLVWNNDL  
LIHWFFDSKKRVNNFLDQKYYFLQKAYAFHFFDKQLLLIFGCLLVLTITKFFQFLYKFKEYKVIH  
YNILTLSMRHNQVTLVTCEILVHYLFVYKLLPVLHLCIIVLVWKLTTQSIEMLITGDFVIYIVIQL  
LLSFSCIYTEEVYITDHIELLVLFELLVLLYYWLSVSVMFYLMDRCHYEVLQLLLILLVLYLEGKI  
LLNSFEVVFLIMPLTDFLHYILYCLLYLLFCTLHFMILLVQAILLVFQVITIELHLLHIFYLKILLF  
LYLFLYVLLYSLCLMFIVIIIWLILCKLLLLLYLNDTYYSMLFDLYLINYVLRCLVLFLLCYY  
LLQIVDLEVYNLDHLVKLSEFLLISFCNVLNTLKIHLYYVNVLYYTLVILLYYLLVTIIVLIYLI  
NLNYFIKLTKYIKIIYIFYLRYYSILGFQFIYIILCITLHLALANLLFPLVWNNDLLIHWFFESKK  
EIRNIFLLLLILFLKNIHFALPFSCIKMNDIKNKYLNYSYVILSYIATHIRSCINTCTCLISCSLCYSC  
KKNYGYAKKIRSCCRLLWTIASICCLKTFIKRICSSYTIYCSFLFRSCNNFNFCIIRLRCTLWSW  
FRDKRHEFRYILHVSCVIFSIRYSISWLKCEIRFSRFSKYSSINLINIKFSYINSNYDNRKFKFNCL  
YISKSYLIYTTFISCVYNIFHRIYSDKSSFFSRGPANLVWSGYMSQIARKPFYFKNKRQLAGNLIP  
NKYIIKLFIDTQFNIYIYLFYIMIKDIVNHRCESTKKKHMGTPLGESELVSGFMTEHA AVVF  
VFFFLAEYGSIVLMCILTILFIGGYLLFEISYVFTVVNYIFFELFFIDVTFVEVQSLYTDFLNNSIIE  
GLLYGFNLGLKSSLMIFTFIARASFPRIKFDQLMGFCTVLLPINFAIILVPCVLYSFNLLPVNIPLF  
LTHPPALLPQGYSTYEEGNRSRTILVNNYTYTKTIYHTRECNYTLFLYSTLLAYYYLYMIILLNL  
LGYINKKFVNFFHHFLIQNTNF

>YN161

ITILKNIKSYIKIIHLYSINLKGIFSILYLVLFFFSLQVFLLLGSLLNRWYARLLIKVISFYLLQYLV  
LEGFIILKKCSFIHLLTINTKKLKIILLMVKLLIETIKYMLNLIQMLCLVLWQLFLLHFYYSCLIK  
NDVWVLYWYNLYLAINEYDIIYRVCICYSYFIFSHFYICSSLSRKIYFRVWFPFFRAKNTIRYKI  
LYFCFSLFTFRFRNIINFPRSVWCWYLSFSYFNFYSYNNYRIYIIRKRSNRQQTKIYTIERLPYR  
VCWNRGFVKLRQKTKKPTKGLMGSYKKMITYIYSYYIFTITRIIYIYIILLYIKIIIRYNYSILLY  
KNIYPIINFIFLIIFFYIMLTHLQMKRTKYCCYSSGYRKIFLYYFLGGSFSVRGYMDGRRVFIL  
MNSGFKLTLFMNLNYYINVGYDRIMYSLRVKRDTPTYNTYWFRVEYIYLRVKNIYIQYIINIVI  
YWYGLNQVYILSFDKHLFFYLLLLLYCEINNYNIILHSTYLGILSYLAINDSNQILFSLVWNNDL  
LIHWFFDSKKRVNNFLDQKYYFLQKAYAFHFFDKQLLLIFGCLLVLTITKFFQFLYKFKEYKVIH  
YNILTLSMRHNQVTLVTCEILVHYLFVYKLLPVLHLCIIVLVWKLTTQSIEMLITGDFVIYIVIQL  
LLSFSCIYTEEVYITDHIELLVLFELLVLLYYWLSVSVMFYLMDRCHYEVLQLLLILLVLYLEGKI  
LLNSFEVVFLIMPLTDFLHYILYCLLYLLFCTLHFMILLVQAILLVFQVITIELHLLHIFYLKILLF  
LYLFLYVLLYSLCLMFIVIIIWLILCKLLLLLYLNDTYYSMLFDLYLINYVLRCLVLFLLCYY  
LLQIVDLEVYNLDHLVKLSEFLLISFCNVLNTLKIHLYYVNVLYYTLVILLYYLLVTIIVLIYLI  
NLNYFIKLTKYIKIIYIFYLRYYSILGFQFIYIILCITLHLALANLLFPLVWNNDLLIHWFFESKK  
EIRNIFLLLLILFLKNIHFALPFSCIKMNDIKNKYLNYSYVILSYIATHIRSCINTCTCLISCSLCYSC  
KKNYGYAKKIRSCCRLLWTIASICCLKTFIKRICSSYTIYCSFLFRSCNNFNFCIIRLRCTLWSW  
FRDKRHEFRYILHVSCVIFSIRYSISWLKCEIRFSRFSKYSSINLINIKFSYINSNYDNRKFKFNCL  
YISKSYLIYTTFISCVYNIFHRIYSDKSSFFSRGPANLVWSGYMSQIARKPFYFKNKRQLAGNLIP  
NKYIIKLFIDTQFNIYIYLFYIMIKDIVNHRCESTKKKHMGTPLGESELVSGFMTEHA AVVF  
VFFFLAEYGSIVLMCILTILFIGGYLLFEISYVFTVVNYIFFELFFIDVTFVEVQSLYTDFLNNSIIE  
GLLYGFNLGLKSSLMIFTFIARASFPRIKFDQLMGFCTVLLPINFAIILVPCVLYSFNLLPVNIPLF

LTHPPALLPQGYSTYEEGNRSRTILVNNTYTKTIYHTRECNYTLFLYSTLLGYYYLYMIIILLNL  
LGYINKKFVNFFHHFLIQNTNF

>YN166

ITILKNIKSYIKIIHLYSINLKGIFSILYLVLFFFSLQVFLLLGSLLNRWYARLLIKVISFYLLQYLV  
LEGFIILKKCSFIHILTINTKKLKIILLMVKLLIETIKYMLNLIQMLCLVLWQLFLLHFYYSCLIK  
NDVWVLYWYNLYLAINEYDIIYRVCICYSYFIFSHFYICSSSLSRKIYFRVWFPFFRAKNTIRYKI  
LYFCFSLFTFRFRNIINFPRSVWCWYLSFSYFNFYSYNNYRIYIIRKRSNRQQTKIYTIERLPYR  
VCWNRGFKLRQKTKKPTKGLMGSYKKMITYIYSYIIFTITRIIYIYIILLYIKIIIRYNYSILLY  
KNIIYPIINFIFFLIIFFYIMLTHLQMKRTKYCCYSSGYRKIFLYYFLLLGSFSVRGYMDGRRVFIL  
MNSGFKLTLFMNLNynyINVGyDRIMYSLRVKRDTPTYNTYWFRVEYIYLRVKNIYIQYIINIVI  
YWYGLNQVYILSFDKHLFFYLLLLLYCEINNynIILHSTYLGILSYLAINDSNQILFSLVWNNDL  
LIHWFFDSKKRVNNFLDQKYYFLQKAYAFHFFDKQLLLIFGCLLVLTITKFFQFLYKFKEYKVIH  
YNILTSMRHNQVTLVTCEILVHYLFVYKLLPVLHLCIIVLVWKLTTQSIEMITGDFVIYIVIQ  
LLSFSCIYTEEVYITDHIELLVLFELLVLLYYWLSVSVMFYLMDRCHYEVLQLLLILLVLYLEGKI  
LLNSFEVVFLIMPLTDFLHYILYCLLYLLFCTLHFMILLVQAILLVFQVITIELHLLHIFYLKILLF  
LYLFLYVLLYSLCMLFGIVIIILWLILCKLLLLLYLNDTYYSMLFDLYLINYVLRCLVFLLCYY  
LLQIVDLEVYNLDHLVKLSEFLLISFCNVLNTLKIHLYYVNVLYYTLVILLYYLLVTHIVLIYLI  
NLNYFIKLTKYIKIIIIYIFYLRYYSILGFQFIYIILCITLHLALANLLFPLVWNNDLLIHWFFESKK  
EIRNIFLLLLILFLKNIHFALPFSCIKMNDIKNKYLNYSYVILSYIATHIRSCINTCTCLISCSLCYSC  
KKNYGYAKKIRSCRLWTIASICCLKTFIKRICSSYTIYCSFLFRSCNNFNFCIIRLRCYTLWSW  
FRDKRHEFRYILHVSCVIFSIRYSISWLKCEIRFSRFSKYSSINLINIKFSYINSNYDNRKFKFNCL  
YISKSYLIYTTFISCVYNIFHRIYSDKSSFFSRGPANLVWSGYMSQIARKPFYFKNKRQLAGNLIP  
NKYIIKLFDITQFNIYIYFIYMIKDIVNHRCESTKKKHMGTPLLGESELVSGFMTEHAAVVF  
VFFFLAEYGSIVLMCILTILFIGGYLLFEISYVFTVVNYIFFELFFIDVTFVEVQSLYTDFLNNIIIE  
GLLYGFNLGLKSSLMIFTFIARASFPRIKFDQLMGFCTVLLPINFAIIILVPCVLYSFNLLPVNIPLF  
LTHPPALLPQGYSTYEEGNRSRTILVNNTYTKTIYHTRECNYTLFLYSTLLAYYYLYMIIILLNL  
LGYINKKFVNFFHHFLIQNTNF

>YN179

ITILKNIKSYIKIIHLYSINLKGIFSILYLVLFFFSLQVFLLLGSLLNRWYARLLIKVISFYLLQYLV  
LEGFIILKKCSFIHILTINTKKLKIILLMVKLLIETIKYMLNLIQMLCLVLWQLFLLHFYYSCLIK  
NDVWVLYWYNLYLAINEYDIIYRVCICYSYFIFSHFYICSSSLSRKIYFRVWFPFFRAKNTIRYKI  
LYFCFSLFTFRFRNIINFPRSVWCWYLSFSYFNFYSYNNYRIYIIRKRSNRQQTKIYTIERLPYR  
VCWNRGFKLRQKTKKPTKGLMGSYKKMITYIYSYIIFTITRIIYIYIILLYIKIIIRYNYSILLY  
KNIIYPIINFIFFLIIFFYIMLTHLQMKRTKYCCYSSGYRKIFLYYFLLLGSFSVRGYMDGRRVFIL  
MNSGFKLTLFMNLNynyINVGyDRIMYSLRVKRDTPTYNTYWFRVEYIYLRVKNIYIQYIINIVI  
YWYGLNQVYILSFDKHLFFYLLLLLYCEINNynIILHSTYLGILSYLAINDSNQILFSLVWNNDL  
LIHWFFDSKKRVNNFLDQKYYFLQKAYAFHFFDKQLLLIFGCLLVLTITKFFQFLYKFKEYKVIH  
YNILTSMRHNQVTLVTCEILVHYLFVYKLLPVLHLCIIVLVWKLTTQSIEMITGDFVIYIVIQ  
LLSFSCIYTEEVYITDHIELLVLFELLVLLYYWLSVSVMFYLMDRCHYEVLQLLLILLVLYLEGKI  
LLNSFEVVFLIMPLTDFLHYILYCLLYLLFCTLHFMILLVQAILLVFQVITIELHLLHIFYLKILLF  
LYLFLYVLLYSLCMLFGIVIIILWLILCKLLLLLYLNDTYYSMLFDLYLINYVLRCLVFLLCYY  
LLQIVDLEVYNLDHLVKLSEFLLISFCNVLNTLKIHLYYVNVLYYTLVILLYYLLVTHIVLIYLI  
NLNYFIKLTKYIKIIIIYIFYLRYYSILGFQFIYIILCITLHLALANLLFPLVWNNDLLIHWFFESKK  
EIRNIFLLLLILFLKNIHFALPFSCIKMNDIKNKYLNYSYVILSYIATHIRSCINTCTCLISCSLCYSC

KKNYGYAKKIRSCCRLLWTIASICCLKTFIKRICSSYTIYCSFLFRSCNNFNFCIIRLRCTLWSW  
FRDKRHEFRYILHVSCVIFSIRYSISWLKCEIRFSRFSKYSSINLINIKFSYINSNYDNRKFKFNCL  
YISKSYLIYTTFISCVYNIFHRIYSDKSSFFSRGPANLVWSGYMSQIARKPFYFKNKRQLAGNLIP  
NKYIIKLFIDTQFNIYIYLFYMIKDIVNHRCESTKKKHMGTPLLGESELVSGFMTEHAAVVF  
VFFFLAEYGSIVLMCILTILFIGGYLLFEISYVFTVVNYIFFELFFIDVTFVEVQSLYTDFLNNSIIE  
GLLYGFNLGLKSSLMIFTFIARASFPRIKFDQLMGFCTVLLPINFAIILVPCVLYSFNLLPVNIPLF  
LTHPPALLPQGYSTYEEGNRSRTILVNNYTYTKTIYHTRECNYTLFLYSTLLGYYYLYMIHLLNL  
LGYINKKFVNFFHHFLIQNTNF

>YN199

ITILKNIKSYIKIIHLYSINLKGIFSILYLVLFFFSLQVFLLLGSLLNRWYARLLIKVISFYLLQYLV  
LEGFIILKKCSFIHLLTINTKKLKIILLMVKLLIETIKYMLNLIQMLCLVLWQLFLLHFFYYSCLIK  
NDVWVLYWYNLYLAINEYDIIYRVCICYSYFIFSHFYICSSSLSRKIYFRVWFPFRAKNTIRYKI  
LYFCFSLFTFRFRNIINFPRSVWCWYLSFSYFNFSYNNYRIYIIRKRSNRQQTKIYTIERLPYR  
VCWNRGFVKLRQKTKKPTKGLMGSYKKMITYIYSYIFTITRIIYIYIILLYIKIIIRYNYSILLY  
KNIIYPIINFIFLLIIFFYIMLTHLQMKRTKYCCYSSGYRKIFLYYFLFGSFSVRGYMDGRRVFIL  
MNSGFKLTLFMNLNYYINVGYDRIMYSLRVKRDPTTYNTYWFRVEYIYLRVKNIYIYIINIVI  
YWYGLNQVYILSFDKHLFFYLLLLLYCEINNYYNIILHSTYLGILSYLAINDSNQILFSLVWNNDL  
LIHWFFDSKKRVNNFLDQKYYFLQKAYAFHFFDKQLLLIFGCLLVLTITKFFQFLYKFKEYKVIH  
YNILTLMSRHNQVTLVTCEILVHYLFVYKLLPVLHLCIIVLVWKLTTQSIEMLITGDFVIYIYIQL  
LLSFSCIYTEEVYITDHIELLVLFELLVLLYYWLSVSVMFYLMDRCHYEVLQLLLILVLVYLEGKI  
LLNSFEVVFLIMPLTDFLHYILYCLLYLLFCTLHFMILLVQAILLVFQVITIELHLLHIFYLKILLF  
LYLFLYVLLYSLCLMFGIVIIILWLILCKLLLLLYLNDTYYSMLFDLYLINYVLRCLVLFLLCYY  
LLQIVDLEVYNLDHLVKLSEFLLISFCNVLNTLKIHLIYVNVLYYTLVILLLYYLLVTIIVLIYLI  
NLNYFIKLTKYIKIIYIFYLRYYSILGFQFIYIILCITLHLALANLLFPLVWNNDDLIIHWFFESKK  
EIRNIFLLLLLILFLKNIHFALPFSCIKMNDIKNKYLNYSYVILSYIATHIRSCINTCTCLISCSLCYSC  
KKNYGYAKKIRSCCRLLWTIASICCLKTFIKRICSSYTIYCSFLFRSCNNFNFCIIRLRCTLWSW  
FRDKRHEFRYILHVSCVIFSIRYSISWLKCEIRFSRFSKYSSINLINIKFSYINSNYDNRKFKFNCL  
YISKSYLIYTTFISCVYNIFHRIYSDKSSFFSRGPANLVWSGYMSQIARKPFYFKNKRQLAGNLIP  
NKYIIKLFIDTQFNIYIYLFYMIKDIVNHRCESTKKKHMGTPLLGESELVSGFMTEHAAVVF  
VFFFLAEYGSIVLMCILTILFIGGYLLFEISYVFTVVNYIFFELFFIDVTFVEVQSLYTDFLNNSIIE  
GLLYGFNLGLKSSLMIFTFIARASFPRIKFDQLMGFCTVLLPINFAIILVPCVLYSFNLLPVNIPLF  
LTHPPALLPQGYSTYEEGNRSRTILVNNYTYTKTIYHTRECNYTLFLYSTLLAYYYLYMIHLLNL  
LGYINKKFVNFFHHFLIQNTNF

>YN208

ITILKNIKSYIKIIHLYSINLKGIFSILYLVLFFFSLQVFLLLGSLLNRWYARLLIKVISFYLLQYLV  
LEGFIILKKCSFIHLLTINTKKLKIILLMVKLLIETIKYMLNLIQMLCLVLWQLFLLHFFYYSCLIK  
NDVWVLYWYNLYLAINEYDIIYRVCICYSYFIFSHFYICSSSLSRKIYFRVWFPFRAKNTIRYKI  
LYFCFSLFTFRFRNIINFPRSVWCWYLSFSYFNFSYNNYRIYIIRKRSNRQQTKIYTIERLPYR  
VCWNRGFVKLRQKTKKPTKGLMGSYKKMITYIYSYIFTITRIIYIYIILLYIKIIIRYNYSILLY  
KNIIYPIINFIFLLIIFFYIMLTHLQMKRTKYCCYSSGYRKIFLYYFLFGSFSVRGYMDGRRVFIL  
MNSGFKLTLFMNLNYYINVGYDRIMYSLRVKRDPTTYNTYWFRVEYIYLRVKNIYIYIINIVI  
YWYGLNQVYILSFDKHLFFYLLLLLYCEINNYYNIILHSTYLGILSYLAINDSNQILFSLVWNNDL  
LIHWFFDSKKRVNNFLDQKYYFLQKAYAFHFFDKQLLLIFGCLLVLTITKFFQFLYKFKEYKVIH  
YNILTLMSRHNQVTLVTCEILVHYLFVYKLLPVLHLCIIVLVWKLTTQSIEMLITGDFVIYIYIQL

LLSFSCIYTEEVYITDHIELLVLFELLVLLYYWLSVSVMFYLMDRCHYEVLQLLLILLVLYLEGKI  
LLNSFEVVFLIMPLTDFLHYILYCLLYLLFCTLHFMILLVQAILLVFQVITIELHLLHIFYLKILLF  
LYLFLYVLLYSLCMLFGIVIIHLWLILCKLLLLLYLNDTYYSMLFDLYLINYVLRCLVLFLLCYY  
LLQIVDLEVYNLDHLVKLSEFLLISFCNVLNTLKIHLYYVNVLYYTLVILLYYLLVTHIYLIYLI  
NLNYFIKLTKYIKIIYIFYLRYYSILGFQFIIYIILCITLHLALANLLFPLVWNNDDLHWWFESKK  
EIRNIFLLLLILFLKNIHFALPFSCIKMNDIKNKYLNYSYVILSYIATHIRSCINTCTCLISCSLCYSC  
KKNYGYAKKIRSCCRLLWTIASICCLKTFIKRICSSYTIYCSFLFRSCNNFNFCIIRLRCTLWSW  
FRDKRHEFRYILHVSCVIFSIRYSISWLKCEIRFSRFSKYSSINLINIKFSYINSNYDNRKFKFNCL  
YISKSYLIYTTFISCVYNIFHRIYSDKSSFFSRGPANLVWSGYMSQIARKPFYFKNKRQLAGNLIP  
NKYIIKLFIDTQFNIYIYLFYIMIKDIVNHRCESTKKKHMGTPLLGESELVSGFMTEHAAVVF  
VFFFLAEYGSIVLMCILTSLFIGGYLLFEISYVFTVVNYIFFELFFIDVTFVEVQSLYTDFLNNSIIE  
GLLYGFNLGLKSSLMIFTFIARASFPRIKFDQLMGFCTVLLPINFAIIILVPCVLYSFNLLPVNIPLF  
LTHPPALLPQGYSTYEEGNRSRTILVNNTYTYTKTIYHTRECNYTLFLYSTLLAYYYLYMIIILLNL  
LGYINKKFVNFFHHFLIQNTNF

>YN220

ITILKNIKSYIKIIHLYSINLKGIFSILYLVLFFFSLQVFLLLGSLLNRWYARLLIKVISFYLLQYLV  
LEGFIILKKCSFIHILTINTKKLKIILLMVKLLIETIKYMLNLIQMLCLVLWQLFLLHFYYSCLIK  
NDVWVLYWYNLYLAINEYDIIYRVCICYSYFIFSHFYICSSLSRKIYFRVWFPFFRAKNTIRYKI  
LYFCFSLFTFRFRNIINFPRSVWCWYLSFSYFNFYSYNNYRIYIIRKRSNRQQTKIYTIERLPYR  
VCWNRGFKLRQKTKKPTKGLMGSYKKMITYIYSYIFTITRIIYIYIILLYIKIIIRYNYSILLY  
KNIYPIINFIFFLIIFFYIMLTHLQMKRTKYCCYSSGYRKIFLYYLFLLGSFSVRGYMDGRRVFIL  
MNSGFKLTLFMNLNYNYNINVGYDRIMYSLRVKRDTPTYNTYWFRVEYIYLRVKNIYIQYIINIVI  
YWYGLNQVYILSFDKHLFFYLLLLLYCEINNYNIILHSTYLGILSYLAINDSNQILFSLVWNNDL  
LIHWWFDSKKRVNNFLDQKYYFLQKAYAFHFFDKQLLLIFGCLLVLTITKFFQFLYKFKEYKVIH  
YNILTLSMRHNQVTLVTCEILVHYLFVYKLLPVLHLCIIVLVWKLTTQSIEMITGDFVIYIVIQL  
LLSFSCIYTEEVYITDHIELLVLFELLVLLYYWLSVSVMFYLMDRCHYEVLQLLLILLVLYLEGKI  
LLNSFEVVFLIMPLTDFLHYILYCLLYLLFCTLHFMILLVQAILLVFQVITIELHLLHIFYLKILLF  
LYLFLYVLLYSLCMLFGIVIIHLWLILCKLLLLLYLNDTYYSMLFDLYLINYVLRCLVLFLLCYY  
LLQIVDLEVYNLDHLVKLSEFLLISFCNVLNTLKIHLYYVNVLYYTLVILLYYLLVTHIYLIYLI  
NLNYFIKLTKYIKIIYIFYLRYYSILGFQFIIYIILCITLHLALANLLFPLVWNNDDLHWWFESKK  
EIRNIFLLLLILFLKNIHFALPFSCIKMNDIKNKYLNYSYVILSYIATHIRSCINTCTCLISCSLCYSC  
KKNYGYAKKIRSCCRLLWTIASICCLKTFIKRICSSYTIYCSFLFRSCNNFNFCIIRLRCTLWSW  
FRDKRHEFRYILHVSCVIFSIRYSISWLKCEIRFSRFSKYSSINLINIKFSYINSNYDNRKFKFNCL  
YISKSYLIYTTFISCVYNIFHRIYSDKSSFFSRGPANLVWSGYMSQIARKPFYFKNKRQLAGNLIP  
NKYIIKLFIDTQFNIYIYLFYIMIKDIVNHRCESTKKKHMGTPLLGESELVSGFMTEHAAVVF  
VFFFLAEYGSIVLMCILTSLFIGGYLLFEISYVFTVVNYIFFELFFIDVTFVEVQSLYTDFLNNSIIE  
GLLYGFNLGLKSSLMIFTFIARASFPRIKFDQLMGFCTVLLPINFAIIILVPCVLYSFNLLPVNIPLF  
LTHPPALLPQGYSTYEEGNRSRTILVNNTYTYTKTIYHTRECNYTLFLYSTLLAYYYLYMIIILLNL  
LGYINKKFVNFFHHFLIQNTNF

>YN226

ITILKNIKSYIKIIHLYSINLKGIFSILYLVLFFFSLQVFLLLGSLLNRWYARLLIKVISFYLLQYLV  
LEGFIILKKCSFIHILTINTKKLKIILLMVKLLIETIKYMLNLIQMLCLVLWQLFLLHFYYSCLIK  
NDVWVLYWYNLYLAINEYDIIYRVCICYSYFIFSHFYICSSLSRKIYFRVWFPFFRAKNTIRYKI  
LYFCFSLFTFRFRNIINFPRSVWCWYLSFSYFNFYSYNNYRIYIIRKRSNRQQTKIYTIERLPYR

VCWNRGFVKLRQKTKKPTKGLMGSYKKMITYIYSYYIFTITRIIYIYIILLYIKIIIRYNYSILLY  
KNIIYPIINFIFFLIIFFYIMLTHLQMKRTKYCCYSSGYRKIFLYYFLLLGSFSVRGYMDGRRVFIL  
MNSGFKLTLFMNLNynyINvgYDRIMYSLRVKRDTPtyNTYwFRVEYIYLRVKNIYIqYIINIVI  
YWYGLNQVYILSFDKHLFFYLLLLLYCEINNYNIILHSTYLgILSYLAINDSNQILFSLVWNNDL  
LIHWFFDSKKRVNNFLDQKYYFLQKAYAFHFFDKQLLLIFGCLLVLTITKFFQFLYKFKEYKVIH  
YNILTLSMRHNQVTLVTCEILVHYLFVYKLLPVLHLCIIVLVWKLTTQSIEMLitGDFVIYIvIQL  
LLSFSCIYTEEVYITDHIELLVLFELLVLLYYWLSVSVMFYLMDRCHYEVLQLLLILLVLYLEGKI  
LLNSFEVVFLIMPLTDFLHYILYCLLYLLFCTLHFMILLVQAILLVFQVITIELHLLHIFYLKILLF  
LYLFLYVLLYSLCLMFGIVIIILWLILCKLLLLLYLNDTYYSMLFDLYLINYVLRCLVLFLLCY  
LLQIVDLEVYNLDHLVKLSEFLLISFCNVLNTLKIHLYYVNVLYYTLVILLYYLLVTIIVLIYLI  
NLNYFIKLTKYIKIIYIFYLRYYSILGFQFIYIILCITLHLALANLLFPLVWNNDLLIHWFFESKK  
EIRNIFLLLLILFLKNIHFALPFSCIKMNDIKNKYLNYSYVILSYIATHIRSCINTCTCLISCSLCYSC  
KKNYGYAKKIRSCRLWTIASICCLKTFIKRICSSYTIYCSFLFRSCNNFNFCIIRLRCYTLWSW  
FRDKRHEFRYILHVSCVIFSIRYSISWLKCEIRFSRFSKYSSINLINIKFSYINSNYDNRKFKFNCL  
YISKSYLIYTTFISCVYNIFHRIYSDKSSFFSRGPANLVWSGYMSQIARKPFYFKNKRQLAGNLIP  
NKYIIKLFIDTQFNIYIYLFYIMIKDIVNHRCESTKKKHMGTPLGESELVSGFMTEHAAVVF  
VFFFLAEYGSIVLMCILTSILFIGGYLLFEISYVFTVVNYIFFELFFIDVTFVEVQSLYTDFLNNSIIE  
GLLYGFNLGLKSSLMIFTFIARASFPRIKFDQLMGFCTVLLPINFAIIILVPCVLYSFNLLPVNIPLF  
LTHPPALLPQGYSTYEEGNRSRTILVNNTYTKTIYHTRECNYTLFLYSTLLAYYYLYMIIILLNL  
LGYINKKFVNFFHHFLIQNTN

>YN228

ITILKNIKSYIKIIHLYSINLKGIFSILYLVLFFFSLQVFLLLGSLLNRWYARLLIKVISFYLLQYLV  
LEGFIILKKCSFIHLTINTKKLKIILLMVKLLIETIKYMLNLIQMLCLVLWQLFLLHFYYSCLIK  
NDVWVLYWYNLYLAINEYDIIYRVCICYSYFIFSHFYICSSSLSRKIYFRVWFPFRKANTIRYKI  
LYFCFSLFTFRFRNIINFPRSVCWYLSFSYFNFSYNRYIIRKRSNRQQTKIIYTIERLPYR  
VCWNRGFVKLRQKTKKPTKGLMGSYKKMITYIYSYYIFTITRIIYIYIILLYIKIIIRYNYSILLY  
KNIIYPIINFIFFLIIFFYIMLTHLQMKRTKYCCYSSGYRKIFLYYFLLLGSFSVRGYMDGRRVFIL  
MNSGFKLTLFMNLNynyINvgYDRIMYSLRVKRDTPtyNTYwFRVEYIYLRVKNIYIqYIINIVI  
YWYGLNQVYILSFDKHLFFYLLLLLYCEINNYNIILHSTYLgILSYLAINDSNQILFSLVWNNDL  
LIHWFFDSKKRVNNFLDQKYYFLQKAYAFHFFDKQLLLIFGCLLVLTITKFFQFLYKFKEYKVIH  
YNILTLSMRHNQVTLVTCEILVHYLFVYKLLPVLHLCIIVLVWKLTTQSIEMLitGDFVIYIvIQL  
LLSFSCIYTEEVYITDHIELLVLFELLVLLYYWLSVSVMFYLMDRCHYEVLQLLLILLVLYLEGKI  
LLNSFEVVFLIMPLTDFLHYILYCLLYLLFCTLHFMILLVQAILLVFQVITIELHLLHIFYLKILLF  
LYLFLYVLLYSLCLMFGIVIIILWLILCKLLLLLYLNDTYYSMLFDLYLINYVLRCLVLFLLCY  
LLQIVDLEVYNLDHLVKLSEFLLISFCNVLNTLKIHLYYVNVLYYTLVILLYYLLVTIIVLIYLI  
NLNYFIKLTKYIKIIYIFYLRYYSILGFQFIYIILCITLHLALANLLFPLVWNNDLLIHWFFESKK  
EIRNIFLLLLILFLKNIHFALPFSCIKMNDIKNKYLNYSYVILSYIATHIRSCINTCTCLISCSLCYSC  
KKNYGYAKKIRSCRLWTIASICCLKTFIKRICSSYTIYCSFLFRSCNNFNFCIIRLRCYTLWSW  
FRDKRHEFRYILHVSCVIFSIRYSISWLKCEIRFSRFSKYSSINLINIKFSYINSNYDNRKFKFNCL  
YISKSYLIYTTFISCVYNIFHRIYSDKSSFFSRGPANLVWSGYMSQIARKPFYFKNKRQLAGNLIP  
NKYIIKLFIDTQFNIYIYLFYIMIKDIVNHRCESTKKKHMGTPLGESELVSGFMTEHAAVVF  
VFFFLAEYGSIVLMCILTSILFIGGYLLFEISYVFTVVNYIFFELFFIDVTFVEVQSLYTDFLNNSIIE  
GLLYGFNLGLKSSLMIFTFIARASFPRIKFDQLMGFCTVLLPINFAIIILVPCVLYSFNLLPVNIPLF  
LTHPPALLPQGYSTYEEGNRSRTILVNNTYTKTIYHTRECNYTLFLYSTLLAYYYLYMIIILLNL

LGYNKKFVNFFHHFLIQNTNY

>YN232

ITILKNIKSYIKIIHLYSINLKGIFSILYLVLFFFLLQVFLLLGSLNRWYARLLIKVISFYLLQYLV  
LEGFIILKKCSFIHLLTINTKKLKIILLMVKLLIETIKYMLNLIQMLCLVLWQLFLLHFYYSCLIK  
NDVWVLYWYNLYLAINEYDIIYRVCICYSYFIFSHFYICSSSLSRKIYFRVWFPFFRAKNTIRYKI  
LYFCFSLFTFRFRNIINFPRSVWCWYLSFSYFNFYSYNNYRIYIIRKRSNRQQTKIIYTIERLPYR  
VCWNRGFVKLRQKTKKPTKGLMGSYKKMITYIYSYIFTITRIIYIYIILLYIKIIIRYNYSILLY  
KNIIYPIINFIFLLIIFFYIMLTHLQMKRTKYCCYSSGYRKIFLYYLFLLGSFSVRGYMDGRRVFIL  
MNSGFKLTLMNLYNINVGYDRIMYSLRVKRDPTTYNTYWFRVEYIYLRVKNIYIQYIINIVI  
YWYGLNQVYILSFDKHLFFYLLLLLYCEINNYNILHSTYLGILSYLAINDSNQILFSLVWNNDL  
LIHWFFDSKKRVNNFLDQKYYFLQKAYAFHFFDKQLLLIFGCLLVLTITKFFQFLYKFKEYKVIH  
YNILTLSMRHNQVTLVTCEILVHYLFVYKLLPVLHLCIIVLVWKLTTQSIEMITGDFVIYIVIQ  
LLSFSCIYTEEVYITDHIELLVLFELLVLLYYWLSVSVMFYLMDRCHYEVLQLLLILLVLYLEGKI  
LLNSFEVVFLIMPLTDFLHYILYCLLYLLFCTLHFMILLVQAILLVFQVITIELHLLHIFYLKILLF  
LYLFLYVLLYSLCLMFGIVIIILWLILCKLLLLLYLNDTYYSMLFDLYLINYVLRCLVLFLLCY  
LLQIVDLEVYNLDHLVKLSEFLLISFCNVLNTLKIHLYYVNVLYYTLVILLYYLLVTIIVLIYLI  
NLNYFIKLTKYIKIIYIFYLRYYSILGFQFIYIILCITLHLALANLLFPLVWNNDLLIHWFFESKK  
EIRNIFLLLLILFLKNIHFALPFSCIKMNDIKNKYLNYSYVILSYIATHIRSCINTCTCLISCSLCYSC  
KKNYGYAKKIRSCCRLLWTIASICCLKTFIKRICSSYTIYCSFLFRSCNNFNFCIIRLRCTLWSW  
FRDKRHEFRYILHVSCVIFSIRYSISWLKCEIRFSRFSKYSSINLINIKFSYINSNYDNRFKFNCL  
YISKSYLIYTTFISCVYNIFHRIYSDKSSFFSRGPANLVWSGYMSQIARKPFYFKNKRQLAGNLIP  
NKYIILKFIDTQFNIYIYLFYMIKDIVNHRCESTKKKHMGTPLGESELVSGFMTEHA AVVF  
VFFFLAEYGSIVLMCILTILFIGGYLLFEISYVFTVNYIFFELFFIDVTFVEVQSLYTDFLNNIIIE  
GLLYGFNLGLKSSLMIFTFIARASFPRIREFDQLMGFCTVLLPINFAIILVPCVLYSFNLLPVNIPLF  
LTHPPALLPQGYSTYEEGNRSRTILVNNYTYTKTIYHTRECNYTLFLYSTLLAYYYLYMIIILLNL  
LGYNKKFVNFFHHFLIQNTNF

>YN239

ITILKNIKSYIKIIHLYSINLKGIFSILYLVLFFFLLQVFLLLGSLNRWYARLLIKVISFYLLQYLV  
LEGFIILKKCSFIHLLTINTKKLKIILLMVKLLIETIKYMLNLIQMLCLVLWQLFLLHFYYSCLIK  
NDVWVLYWYNLYLAINEYDIIYRVCICYSYFIFSHFYICSSSLSRKIYFRVWFPFFRAKNTIRYKI  
LYFCFSLFTFRFRNIINFPRSVWCWYLSFSYFNFYSYNNYRIYIIRKRSNRQQTKIIYTIERLPYR  
VCWNRGFVKLRQKTKKPTKGLMGSYKKMITYIYSYIFTITRIIYIYIILLYIKIIIRYNYSILLY  
KNIIYPIINFIFLLIIFFYIMLTHLQMKRTKYCCYSSGYRKIFLYYLFLLGSFSVRGYMDGRRVFIL  
MNSGFKLTLMNLYNINVGYDRIMYSLRVKRDPTTYNTYWFRVEYIYLRVKNIYIQYIINIVI  
YWYGLNQVYILSFDKHLFFYLLLLLYCEINNYNILHSTYLGILSYLAINDSNQILFSLVWNNDL  
LIHWFFDSKKRVNNFLDQKYYFLQKAYAFHFFDKQLLLIFGCLLVLTITKFFQFLYKFKEYKVIH  
YNILTLSMRHNQVTLVTCEILVHYLFVYKLLPVLHLCIIVLVWKLTTQSIEMITGDFVIYIVIQ  
LLSFSCIYTEEVYITDHIELLVLFELLVLLYYWLSVSVMFYLMDRCHYEVLQLLLILLVLYLEGKI  
LLNSFEVVFLIMPLTDFLHYILYCLLYLLFCTLHFMILLVQAILLVFQVITIELHLLHIFYLKILLF  
LYLFLYVLLYSLCLMFGIVIIILWLILCKLLLLLYLNDTYYSMLFDLYLINYVLRCLVLFLLCY  
LLQIVDLEVYNLDHLVKLSEFLLISFCNVLNTLKIHLYYVNVLYYTLVILLYYLLVTIIVLIYLI  
NLNYFIKLTKYIKIIYIFYLRYYSILGFQFIYIILCITLHLALANLLFPLVWNNDLLIHWFFESKK  
EIRNIFLLLLILFLKNIHFALPFSCIKMNDIKNKYLNYSYVILSYIATHIRSCINTCTCLISCSLCYSC  
KKNYGYAKKIRSCCRLLWTIASICCLKTFIKRICSSYTIYCSFLFRSCNNFNFCIIRLRCTLWSW

FRDKRHEFRYLHVSCVIFSIRYSISWLKCEIRFSRFSKYSSINLINIKFSYINSNYDNRKFKFNCL  
YISKSYLIYTTFISCVYNIFHRIYSDKSSFFSRGPANLVWSGYMSQIARKPFYFKNKRQLAGNLIP  
NKYIIKLFIDTQFNIYIYLFYIMIKDIVNHRCESTKKKHMGTHLPLLGESELVSGFMTEHAAVVF  
VFFFLAEYGSIVLMCILTILFIGGYLLFEISYVFTVVNYIFFELFFIDVTFVEVQSLYTDFLNNSIIE  
GLLYGFNLGLKSSLMIFTFIARASFPRIKFDQLMGFCTVLLPINFAIILVPCVLYSFNLLPVNIPLF  
LTHPPALLPQGYSTYEEGNRSRTILVNNTYTKTIYHTRECNYTLFLYSTLLAYYYLYMIIILLNL  
LGYINKKFVNFFHHFLIQNTNF

>YN247

ITILKNIKSYIKIIHLYSINLKGIFSILYLVLFFFSLQVFLLLGSLLNRWYARLLIKVISFYLLQYLV  
LEGFIILKKCSFIHLTINTKKLKIILLMVKLLIETIKYMLNLIQMLCLVLWQLFLLHFYYSCLIK  
NDVWVLYWYNLYLAINEYDIIYRVCICYSYFIFSHFYICSSSLSRKIYFRVWFPFFRAKNTIRYKI  
LYFCFSLFTFRFRNIINFPRSVWCWYLSFSYFNFYSYNNYRIYIIRKRSNRQQTKIYTIERLPYR  
VCWNRGFVKLRQKTKKPTKGLMGSYKKMITYIYSYIIFTITRIIYIYIILLYIKIIIRYNYSILLY  
KNIYPIINFIFFLIIFFYIMLTHLQMKRTKYCCYSSGYRKIFLYYFLLLGSFSVRGYMDGRRVFIL  
MNSGFKLTLFMNLNNTYINVGYDRIMYSLRVKRDTPYNTYWFRVEYIYLRVKNIYIYIINIVI  
YWYGLNQVYILSFDKHLFFYLLLLLYCEINNYYIILHSTYLGILSYLAINDSNQILFSLVWNNDL  
LIHWFFDSKKRVNNFLDQKYYFLQKAYAFHFFDKQLLLIFGCLLVLTITKFFQFLYKFKEYKVIH  
YNILTLMSMRHNQVTLVTCEILVHYLFVYKLLPVLHLCIIVLVWKLTTQSIEMITGDFVIYIYIQL  
LLSFSCIYTEEVYITDHIELLVLFELLVLLYYWLSVSVMFYLMDRCHYEVLQLLLILLVLYLEGKI  
LLNSFEVVFLIMPLTDFLHYILYCLLYLLFCTLHFMILLVQAILLVFQVITIELHLLHIFYLKILLF  
LYLFLYVLLYSLCMLFGIVIIILWLILCKLLLLLYLNDTYYSMLFDLYLINYVLRCLVFLLCYY  
LLQIVDLEVYNLDHLVKLSEFLLISFCNVLNTLKIHLYYVNVLYYTLVILLYYLLVTHIVLIYLI  
NLNYFIKLTKYIKIIYIFYLRYYSILGFQFIYIILCITLHLALANLLFPLVWNNDLLIHWFFESKK  
EIRNIFLLLLILFLKNIHFALPFSCIKMNDIKNKYLNYSYVILSYIATHIRSCINTCTCLISCSLCYSC  
KKNYGYAKKIRSCCRLLWTIASICCLKTFIKRICSSYTIYCSFLFRSCNNFNFCIIRLRCYTLWSW  
FRDKRHEFRYLHVSCVIFSIRYSISWLKCEIRFSRFSKYSSINLINIKFSYINSNYDNRKFKFNCL  
YISKSYLIYTTFISCVYNIFHRIYSDKSSFFSRGPANLVWSGYMSQIARKPFYFKNKRQLAGNLIP  
NKYIIKLFIDTQFNIYIYLFYIMIKDIVNHRCESTKKKHMGTHLPLLGESELVSGFMTEHAAVVF  
VFFFLAEYGSIVLMCILTILFIGGYLLFEISYVFTVVNYIFFELFFIDVTFVEVQSLYTDFLNNSIIE  
GLLYGFNLGLKSSLMIFTFIARASFPRIKFDQLMGFCTVLLPINFAIILVPCVLYSFNLLPVNIPLF  
LTHPPALLPQGYSTYEEGNRSRTILVNNTYTKTIYHTRECNYTLFLYSTLLAYYYLYMIIILLNL  
LGYINKKFVNFFHHFLIQNTNF

>YN268

ITILKNIKSYIKIIHLYSINLKGIFSILYLVLFFFSLQVFLLLGSLLNRWYARLLIKVISFYLLQYLV  
LEGFIILKKCSFIHLTINTKKLKIILLMVKLLIETIKYMLNLIQMLCLVLWQLFLLHFYYSCLIK  
NDVWVLYWYNLYLAINEYDIIYRVCICYSYFIFSHFYICSSSLSRKIYFRVWFPFFRAKNTIRYKI  
LYFCFSLFTFRFRNIINFPRSVWCWYLSFSYFNFYSYNNYRIYIIRKRSNRQQTKIYTIERLPYR  
VCWNRGFVKLRQKTKKPTKGLMGSYKKMITYIYSYIIFTITRIIYIYIILLYIKIIIRYNYSILLY  
KNIYPIINFIFFLIIFFYIMLTHLQMKRTKYCCYSSGYRKIFLYYFLLLGSFSVRGYMDGRRVFIL  
MNSGFKLTLFMNLNNTYINVGYDRIMYSLRVKRDTPYNTYWFRVEYIYLRVKNIYIYIINIVI  
YWYGLNQVYILSFDKHLFFYLLLLLYCEINNYYIILHSTYLGILSYLAINDSNQILFSLVWNNDL  
LIHWFFDSKKRVNNFLDQKYYFLQKAYAFHFFDKQLLLIFGCLLVLTITKFFQFLYKFKEYKVIH  
YNILTLMSMRHNQVTLVTCEILVHYLFVYKLLPVLHLCIIVLVWKLTTQSIEMITGDFVIYIYIQL  
LLSFSCIYTEEVYITDHIELLVLFELLVLLYYWLSVSVMFYLMDRCHYEVLQLLLILLVLYLEGKI

LLNSFEVVFLIMPLTDFLHYILYCLLYLLFCTLHFMILLVQAILLVFQVITIELHLLHIFYLKILLF  
LYLFLYVLLYSLCLMFGIVIIILWLILCKLLLLLYLNDTYYL SMLFDLYLINYVLRCLVLFLLCYY  
LLQIVDLEVYNLDHLVKLSEFLLISFCNVLNTLKIHLYYVNVLYYTLVILLYYLLVTIIVLIYLI  
NLNYFIKLT KYIKIIYIFYLRYYSILGFQFIIYIILCITLHLALANLLFPLVWNNDDLIIHWWFESKK  
EIRNIFLLLLLILFLKNIHFALPFSCIKMNDIKNKYLNYSYVILSYIATHIRSCINTCTCLISCSLCYSC  
KKNYGYAKKIRSCRLWTIASICCLKTFIKRICSSYTIYCSFLFRSCNNFNFCIIRLRCYTLWSW  
FRDKRHEFRYILHVSCVIFSIRYSISWLKCEIRFSRFSKYSSINLINIKFSYINSNYDNRKFKFNCL  
YISKSYLIYTTFISCVYNIFHRIYSDKSSFFSRGPANLVWSGYMSQIARKPFYFKNKRQLAGNLIP  
NKYIIKLFIDTQFNIYIYLFYIMIKDIVNHRCESTKKKHMGTPLLGESELVSGFMTEHA AVVF  
VFFFLAEYGSIVLMCILT SILFIGGYLLFEISYVFTVVNYIFFELFFIDVTFVEVQSLYTDFLNNSIIE  
GLLYGFNLGLKSSLMIFTFIARASFPRIRFDQLMGFCTVLLPINFAIIILVPCVLYSFNLLPVNIPLF  
LTHPPALLPQGYSTYEEGNRSRTILVNNYTYTKTIYHTRECNYTLFLYSTLLAYYYLYMIIILLNL  
LGYINKKFVNFFHHFLIQNTNF

>YN271

ITILKNIKSYIKIIHLYSINLKGIFSILYLVL LLSLQVFLLLGSLNRWYARLLIKVISFYLLQYLV  
LEGFIILKKCSFIHLTINTKKLKIILLMVKLLIETIKYMLNLIQMLCLVLWQLFLLHFFYYSCLIK  
NDVWVLYWYNLYLAINEYDIIYRVCICYSYFIFSHFYICSSSLSRKIYFRVWFPFRAKNTIRYKI  
LYFCFSLFTFRFRNIINFPRSV CWYLWSFSYFNFSYNNYRIYIIRKRSNRQQTKIIYTIERLPYR  
VCWNRGFVKLRQKTKKPTKGLMGSYKKMITYIYSYYIFTITRIIYIYIILLYIKIIIRYNYSILLY  
KNIYPIINFIFFLIIFFYIMLTHLQMKRTKYCCYSSGYRKIFLYYFLLG SFSVRGYMDGRRVFIL  
MNSGFKLTLFMNLNYNYNVGYDRIMYSLRVKRDTPTYNTYWFRVEYIYLRVKNIYQYIINIVI  
YWYGLNQVYILSFDKHLFFYLLLLLYCEINNYNIIHSTYLGILSYLAINDSNQILFSLVWNNDL  
LIHWWFDSKKRVNFDQKYYFLQKAYAFHFFDKQLLLIFGCLLVLTITKFFQFLYKFKEYKVIH  
YNILTL SMRHNVTLVTCEILVHYLFVYKLLPVLHLCIIVLVWKL LTQSIEMLITGDFVIYVIQL  
LLSFSCIYTEEVYITDHIELLVLFELLVLLYYWLSVSVMFYLMDRCHYEVLQLLLILLVLYLEGKI  
LLNSFEVVFLIMPLTDFLHYILYCLLYLLFCTLHFMILLVQAILLVFQVITIELHLLHIFYLKILLF  
LYLFLYVLLYSLCLMFGIVIIILWLILCKLLLLLYLNDTYYL SMLFDLYLINYVLRCLVLFLLCYY  
LLQIVDLEVYNLDHLVKLSEFLLISFCNVLNTLKIHLYYVNVLYYTLVILLYYLLVTIIVLIYLI  
NLNYFIKLT KYIKIIYIFYLRYYSILGFQFIIYIILCITLHLALANLLFPLVWNNDDLIIHWWFESKK  
EIRNIFLLLLLILFLKNIHFALPFSCIKMNDIKNKYLNYSYVILSYIATHIRSCINTCTCLISCSLCYSC  
KKNYGYAKKIRSCRLWTIASICCLKTFIKRICSSYTIYCSFLFRSCNNFNFCIIRLRCYTLWSW  
FRDKRHEFRYILHVSCVIFSIRYSISWLKCEIRFSRFSKYSSINLINIKFSYINSNYDNRKFKFNCL  
YISKSYLIYTTFISCVYNIFHRIYSDKSSFFSRGPANLVWSGYMSQIARKPFYFKNKRQLAGNLIP  
NKYIIKLFIDTQFNIYIYLFYIMIKDIVNHRCESTKKKHMGTPLLGESELVSGFMTEHA AVVF  
VFFFLAEYGSIVLMCILT SILFIGGYLLFEISYVFTVVNYIFFELFFIDVTFVEVQSLYTDFLNNSIIE  
GLLYGFNLGLKSSLMIFTFIARASFPRIRFDQLMGFCTVLLPINFAIIILVPCVLYSFNLLPVNIPLF  
LTHPPALLPQGYSTYEEGNRSRTILVNNYTYTKTIYHTRECNYTLFLYSTLLAYYYLYMIIILLNL  
LGYINKKFVNFFHHFLIQNTNF

>YN283

ITILKNIKSYIKIIHLYSINLKGIFSILYLVL LLSLQVFLLLGSLNRWYARLLIKVISFYLLQYLV  
LEGFIILKKCSFIHLTINTKKLKIILLMVKLLIETIKYMLNLIQMLCLVLWQLFLLHFFYYSCLIK  
NDVWVLYWYNLYLAINEYDIIYRVCICYSYFIFSHFYICSSSLSRKIYFRVWFPFRAKNTIRYKI  
LYFCFSLFTFRFRNIINFPRSV CWYLWSFSYFNFSYNNYRIYIIRKRSNRQQTKIIYTIERLPYR  
VCWNRGFVKLRQKTKKPTKGLMGSYKKMITYIYSYYIFTITRIIYIYIILLYIKIIIRYNYSILLY

KNIIYPIINFIFLIIFFYIMLTHLQMKRTKYCCYSSGYRKIFLYYLFLLGSFSVRGYMDGRRVFIL  
MNSGFKLTLFMNLNynyINvgYDRIMYSLRVKRDTPtyNTYWFRVEYIYLRVKNIYIQYIINIVI  
YWYGLNQVYILSFDKHLFFYLLLLLYCEINNYNIILHSTYLGILSYLAINDSNQILFSLVWNNDL  
LIHWFFDSKKRVNNFLDQKYYFLQKAYAFHFFDKQLLLIFGCLLVLTITKFFQFLYKFKEYKVIH  
YNILTLSMRHNQVTLVTCEILVHYLFVYKLLPVLHLCIIVLVWKLTTQSIEMLITGDFVIYIVIQL  
LLSFSCIYTEEVYITDHIELLVLFELLVLLYYWLSVSVMFYLMDRCHYEVLQLLLILLVLYLEGKI  
LLNSFEVVFLIMPLTDFLHYILYCLLYLLFCTLHFMILLVQAILLVFQVITIELHLLHIFYLKILLF  
LYLFLYVLLYSLCLMFGIVIIILWLILCKLLLLLYLNDTYYSMLFDLYLINYVLRCLVLFLLCYY  
LLQIVDLEVYNLDHLVKLSEFLLISFCNVLNTLKIHLYYVNVLYYTLVILLYYLLVTHIYLIYLI  
NLNYFIKLTKYIKIIYIFYLRYYFSILGFQFIYIILCITLHLALANLLFPLVWNNDLLIHWFFESKK  
EIRNIFLLLLILFLKNIHFALPFSCIKMNDIKNKYLNYSYVILSYIATHIRSCINTCTCLISCSLCYSC  
KKNYGYAKKIRSCCRLLWTIASICCLKTFIKRICSSYTIYCSFLFRSCNNFNFCIIRLRCTLWSW  
FRDKRHEFRYILHVSCVIFSIRYSISWLKCEIRFSRFSKYSSINLINIKFSYINSNYDNRKFKFNCL  
YISKSYLIYTTFISCVYNIFHRIYSDKSSFFSRGPANLVWSGYMSQIARKPFYFKNKRQLAGNLIP  
NKYIIKLFIDTQFNIYIYLFYIMIKDIVNHRCESTKKKHMGTHLPLLGESELVSGFMTEHAAVVF  
VFFFLAEYGSIVLMCILTSLFIGGYLLFEISYVFTVVNYIFFELFFIDVTFVEVQSLYTDFLNNSIIE  
GLLYGFNLGLKSSLMIFTFIARASFPRIKFDQLMGFCTVLLPINFAIIILVPCVLYSFNLLPVNIPLF  
LTHPPALLPQGYSTYEEGNRSRTILVNNTYTKTIYHTRECNYTLFLYSTLLAYYYLYMIIILLNL  
LGYINKKFVNFFHHFLIQNTNF

>YN311

ITILKNIKSYIKIIHLYSINLKGIFSILYLVLFFFSLQVFLLLGSLLNRWYARLLIKVISFYLLQYLV  
LEGFIILKKCSFIHILTINTKKLKIILLMVKLLIETIKYMLNLIIQMLCLVLWQLFLLLHFYYSCLIK  
NDVWVLYWYNLYLAINEYDIIYRVCICYSYFIFSHFYICSSSLSRKIYFRVWPFPRAKNTIRYKI  
LYFCFSLFTFRFRNIINFPRSVCWYLSFSYFNFSYNRYIYIRKRSNRQQTKIYTIERLPYR  
VCWNRGFKLRQKTKKPTKGLMGSYKKMITYIYSYIYFTITRIIYIYIILLYIKIIIRYNYSILLY  
KNIIYPIINFIFLIIFFYIMLTHLQMKRTKYCCYSSGYRKIFLYYLFLLGSFSVRGYMDGRRVFIL  
MNSGFKLTLFMNLNynyINvgYDRIMYSLRVKRDTPtyNTYWFRVEYIYLRVKNIYIQYIINIVI  
YWYGLNQVYILSFDKHLFFYLLLLLYCEINNYNIILHSTYLGILSYLAINDSNQILFSLVWNNDL  
LIHWFFDSKKRVNNFLDQKYYFLQKAYAFHFFDKQLLLIFGCLLVLTITKFFQFLYKFKEYKVIH  
YNILTLSMRHNQVTLVTCEILVHYLFVYKLLPVLHLCIIVLVWKLTTQSIEMLITGDFVIYIVIQL  
LLSFSCIYTEEVYITDHIELLVLFELLVLLYYWLSVSVMFYLMDRCHYEVLQLLLILLVLYLEGKI  
LLNSFEVVFLIMPLTDFLHYILYCLLYLLFCTLHFMILLVQAILLVFQVITIELHLLHIFYLKILLF  
LYLFLYVLLYSLCLMFGIVIIILWLILCKLLLLLYLNDTYYSMLFDLYLINYVLRCLVLFLLCYY  
LLQIVDLEVYNLDHLVKLSEFLLISFCNVLNTLKIHLYYVNVLYYTLVILLYYLLVTHIYLIYLI  
NLNYFIKLTKYIKIIYIFYLRYYFSILGFQFIYIILCITLHLALANLLFPLVWNNDLLIHWFFESKK  
EIRNIFLLLLILFLKNIHFALPFSCIKMNDIKNKYLNYSYVILSYIATHIRSCINTCTCLISCSLCYSC  
KKNYGYAKKIRSCCRLLWTIASICCLKTFIKRICSSYTIYCSFLFRSCNNFNFCIIRLRCTLWSW  
FRDKRHEFRYILHVSCVIFSIRYSISWLKCEIRFSRFSKYSSINLINIKFSYINSNYDNRKFKFNCL  
YISKSYLIYTTFISCVYNIFHRIYSDKSSFFSRGPANLVWSGYMSQIARKPFYFKNKRQLAGNLIP  
NKYIIKLFIDTQFNIYIYLFYIMIKDIVNHRCESTKKKHMGTHLPLLGESELVSGFMTEHAAVVF  
VFFFLAEYGSIVLMCILTSLFIGGYLLFEISYVFTVVNYIFFELFFIDVTFVEVQSLYTDFLNNSIIE  
GLLYGFNLGLKSSLMIFTFIARASFPRIKFDQLMGFCTVLLPINFAIIILVPCVLYSFNLLPVNIPLF  
LTHPPALLPQGYSTYEEGNRSRTILVNNTYTKTIYHTRECNYTLFLYSTLLAYYYLYMIIILLNL  
LGYINKKFVNFFHHFLIQNTNF

>YN314

ITILKNIKSYIKIIHLYSINLKGIFSILYLVLFFFSLQVFLLLGSLLNRWYARLLIKVISFYLLQYLV  
LEGFIILKKCSFIHLTINTKKLKIILLMVKLLIETIKYMLNLIQMLCLVLWQLFLLHFYYSCLIK  
NDVWVLYWYNLYLAINEYDIIYRVCICYSYFIFSHFYICSSSLSRKIYFRVWFPFFRAKNTIRYKI  
LYFCFSLFTFRFRNIINFPRSVWCWYLSFSYFNFYSYNNYRIYIIRKRSNRQQTKIYTIERLPYR  
VCWNRGFVKLRQKTKKPTKGLMGSYKKMITYIYSYIIFTITRIIYIYIILLYIKIIIRYNYSILLY  
KNIIYPIINFIFLIIFFYIMLTHLQMKRTKYCCYSSGYRKIFLYYLFLLGSFSVRGYMDGRRVFIL  
MNSGFKLTLFMNLNYYINVGYDRIMYSLRVKRDTPYNTYWFRVEYIYLRVKNIYIYIINIVI  
YWYGLNQVYILSFDKHLFFYLLLLLYCEINNYYNIILHSTYLGILSYLAINDSNQILFSLVWNNDL  
LIHWFFDSKKRVNNFLDQKYYFLQKAYAFHFFDKQLLLIFGCLLVLTITKFFQFLYKFKEYKVIH  
YNILTLSMRHNQVTLVTCEILVHYLFVYKLLPVLHLCIIVLVWKLTTQSIEMLTGDFVIYIYIQL  
LLSFSCIYTEEVYITDHIELLVLFELLVLLYYWLSVSVMFYLMDRCHYEVLQLLLILLVLYLEGKI  
LLNSFEVVFLIMPLTDFLHYILYCLLYLLFCTLHFMILLVQAILLVFQVITIELHLLHIFYLKILLF  
LYLFLYVLLYSLCLMFGIVIIILWLILCKLLLLLYLNDTYYSMLFDLYLINYVLRCLVLFLLCYY  
LLQIVDLEVYNLDHLVKLSEFLLISFCNVLNTLKIHLYYVNVLYYTLVILLLYYLLVTIIVLIYLI  
NLNYFIKLTKYIKIIYIFYLRYYSILGFQFIYIILCITLHLALANLLFPLVWNNDLLIHWFFESKK  
EIRNIFLLLLILFLKNIHFALPFSCIKMNDIKNKYLNYSYVILSYIATHIRSCINTCTCLISCSLCYSC  
KKNYGYAKKIRSCRLWTIASICCLKTFIKRICSSYTIYCSFLFRSCNNFNFCIIRLRCYTLWSW  
FRDKRHEFRYILHVSCVIFSIRYISWLKCEIRFSRFSKYSSINLINIKFSYINSNYDNRKFKFNCL  
YISKSYLIYTTFISCVYNIFHRIYSDKSSFFSRGPANLVWSGYMSQIARKPFYFKNKRQLAGNLIP  
NKYIIKLFIDTQFNIIYILFIYMIKDIVNHRCESTKKKHMGTPLGESELVSGFMTEHAAVVF  
VFFFLAEYGSIVLMCILTSLFIGGYLLFEISYVFTVVNYIFFELFFIDVTFVEVQSLYTDFLNNSIIE  
GLLYGFNLGLKSSLMIFTIARASFPRIKFDQLMGFCTVLLPINFAIILVPCVLYSFNLLPVNIPLF  
LTHPPALLPQGYSTYEEGNRSRTILVNNTYTKTIYHTRECNYTLFLYSTLLAYYYLYMIIILLNL  
LGYINKKFVNFFHHFLIQNTNY

>YN352

ITILKNIKSYIKIIHLYSINLKGIFSILYLVLFFFSLQVFLLLGSLLNRWYARLLIKVISFYLLQYLV  
LEGFIILKKCSFIHLTINTKKLKIILLMVKLLIETIKYMLNLIQMLCLVLWQLFLLHFYYSCLIK  
NDVWVLYWYNLYLAINEYDIIYRVCICYSYFIFSHFYICSSSLSRKIYFRVWFPFFRAKNTIRYKI  
LYFCFSLFTFRFRNIINFPRSVWCWYLSFSYFNFYSYNNYRIYIIRKRSNRQQTKIYTIERLPYR  
VCWNRGFVKLRQKTKKPTKGLMGSYKKMITYIYSYIIFTITRIIYIYIILLYIKIIIRYNYSILLY  
KNIIYPIINFIFLIIFFYIMLTHLQMKRTKYCCYSSGYRKIFLYYLFLLGSFSVRGYMDGRRVFIL  
MNSGFKLTLFMNLNYYINVGYDRIMYSLRVKRDTPYNTYWFRVEYIYLRVKNIYIYIINIVI  
YWYGLNQVYILSFDKHLFFYLLLLLYCEINNYYNIILHSTYLGILSYLAINDSNQILFSLVWNNDL  
LIHWFFDSKKRVNNFLDQKYYFLQKAYAFHFFDKQLLLIFGCLLVLTITKFFQFLYKFKEYKVIH  
YNILTLSMRHNQVTLVTCEILVHYLFVYKLLPVLHLCIIVLVWKLTTQSIEMLTGDFVIYIYIQL  
LLSFSCIYTEEVYITDHIELLVLFELLVLLYYWLSVSVMFYLMDRCHYEVLQLLLILLVLYLEGKI  
LLNSFEVVFLIMPLTDFLHYILYCLLYLLFCTLHFMILLVQAILLVFQVITIELHLLHIFYLKILLF  
LYLFLYVLLYSLCLMFGIVIIILWLILCKLLLLLYLNDTYYSMLFDLYLINYVLRCLVLFLLCYY  
LLQIVDLEVYNLDHLVKLSEFLLISFCNVLNTLKIHLYYVNVLYYTLVILLLYYLLVTIIVLIYLI  
NLNYFIKLTKYIKIIYIFYLRYYSILGFQFIYIILCITLHLALANLLFPLVWNNDLLIHWFFESKK  
EIRNIFLLLLILFLKNIHFALPFSCIKMNDIKNKYLNYSYVILSYIATHIRSCINTCTCLISCSLCYSC  
KKNYGYAKKIRSCRLWTIASICCLKTFIKRICSSYTIYCSFLFRSCNNFNFCIIRLRCYTLWSW  
FRDKRHEFRYILHVSCVIFSIRYISWLKCEIRFSRFSKYSSINLINIKFSYINSNYDNRKFKFNCL

YISKSYLIYTTFISCVYNIFHRIYSDKSSFFSRGPANLVWSGYMSQIARKPFYFKNKRQLAGNLIP  
NKYIIKLFIDTQFNIYIYLFYIMIKDIVNHRCESTKKKHMGTPLLGESLVSFGFMTEHA AVVF  
VFFFLAEYGSIVLMCILT SILFIGGYLLFEISYVFTV VNYIFFELFFIDVTFVEVQSLYTDFLNNSIIE  
GLLYGFNLGLKSSLMIFTFIARASFPRI RFDQLMGFCTVLLPINFAI IILVPCVLYSFNLLPVNIPLF  
LTHPPALLPQGYSTYEEGNRSRTILVNNYTYTKTIYHTRECNYTLFLYSTLLAYYYLYMI IILLNL  
LGYINKKFVNFFHHFLIQNTNF

>YN355

ITILKNIKSYIKIIHLYSINLKGIFSILYLVL LLSLQVFLLLGSLLNRWYARLLIKVISFYLLQYLV  
LEGFIILKKCSFIHLTINTKKLKIILLMVKLLIETIKYMLNLIQMLCLVLWQLFLLLFHYYSCLIK  
NDVWVLYWYNLYLAINEYDIIYRVCICYSYFIFSHFYICSSSLSRKIYFRVWFPFFRAKNTIRYKI  
LYFCFSLFTFRFRNIINFPRSV CWYLWSFSYFNFYSYNNYRIYIIRKRSNRQQTKIYTIERLPYR  
VCWNRGFVKLRQKTKKPTKGLMGSYKKMITYIYSYIFTITRIIYIYIILLYIKIIIRYNYSILLY  
KNIYPIINFIFLIIFFYIMLTHLQMKRTKYCCYSSGYRKIFLYYLFLLGSFSVRGYMDGRRVFIL  
MNSGFKLTLFMNLN YNYINVGYDRIMYSLRVKRDTP TYNTYWFRVEYIYLRVKNIYIQYIINIVI  
YWYGLNQVYILSFDKHLFFYLL LLLLYCEINNYNIILHSTYLGILSYLAINDSNQILFSLVWNNDL  
LIHWFFDSKKRVNNFLDQKYYFLQKAYAFHFFDKQLLLIFGCLLVLTITKFFQFLYKFKEYKVIH  
YNILTLSMRHNQVTLVTCEILVHYLFVYKLLPVLHLCIIVLVWKL LTQSIEMLITGDFVIYIVIQL  
LLSFSCIYTEEVYITDHI ELLVLFELLVLLYYWLSVSVMFYLMDRCHYEVLQ LLLILLVLYLEGKI  
LLNSFEVVFLIMPLTDFLHYILYCLLYLLFCTLHFMILLVQAILLVFQVITIELHLLHIFYLKILLF  
LYLFLYVLLYSLCMLFGIVIIILWLILCKLL LLLLYLNDTYYSMLFDLYLINYVLRCLVLFLLCYY  
LLQIVDLEVYNLDHLVKLSEFLL LISFCNVLNTLKIHLYYVNVLYYTLVILLLYYLLVTIIVLIYLI  
NLNYFIKLTKYIKIIYIFYLRYYSILGFQFIYIILCITLHLALANLLFPLVWNNDLLIHWFFESKK  
EIRNIFLLLLILFLKNIHFALPFSCIKMNDIKNKYLNYSYVILSYIATHIRSCINTCTCLISCSLCYSC  
KKNYGYAKKIRSCRLW TIASICCLKTFIKRICSSYTIYCSFLFRSCNNFNFCIIRLRCTLWSW  
FRDKRHEFRYILHVSCVIFS YIRYSISWLKCEIRFSRFSKYSSINLINIKFSYINSNYDNRKFKFNCL  
YISKSYLIYTTFISCVYNIFHRIYSDKSSFFSRGPANLVWSGYMSQIARKPFYFKNKRQLAGNLIP  
NKYIIKLFIDTQFNIYIYLFYIMIKDIVNHRCESTKKKHMGTPLLGESLVSFGFMTEHA AVVF  
VFFFLAEYGSIVLMCILT SILFIGGYLLFEISYVFTV VNYIFFELFFIDVTFVEVQSLYTDFLNNSIIE  
GLLYGFNLGLKSSLMIFTFIARASFPRI RFDQLMGFCTVLLPINFAI IILVPCVLYSFNLLPVNIPLF  
LTHPPALLPQGYSTYEEGNRSRTILVNNYTYTKTIYHTRECNYTLFLYSTLLAYYYLYMI IILLNL  
LGYINKKFVNFFHHFLIQNTNF

>YN358

ITILKNIKSYIKIIHLYSINLKGIFSILYLVL LLSLQVFLLLGSLLNRWYARLLIKVISFYLLQYLV  
LEGFIILKKCSFIHLTINTKKLKIILLMVKLLIETIKYMLNLIQMLCLVLWQLFLLLFHYYSCLIK  
NDVWVLYWYNLYLAINEYDIIYRVCICYSYFIFSHFYICSSSLSRKIYFRVWFPFFRAKNTIRYKI  
LYFCFSLFTFRFRNIINFPRSV CWYLWSFSYFNFYSYNNYRIYIIRKRSNRQQTKIYTIERLPYR  
VCWNRGFVKLRQKTKKPTKGLMGSYKKMITYIYSYIFTITRIIYIYIILLYIKIIIRYNYSILLY  
KNIYPIINFIFLIIFFYIMLTHLQMKRTKYCCYSSGYRKIFLYYLFLLGSFSVRGYMDGRRVFIL  
MNSGFKLTLFMNLN YNYINVGYDRIMYSLRVKRDTP TYNTYWFRVEYIYLRVKNIYIQYIINIVI  
YWYGLNQVYILSFDKHLFFYLL LLLLYCEINNYNIILHSTYLGILSYLAINDSNQILFSLVWNNDL  
LIHWFFDSKKRVNNFLDQKYYFLQKAYAFHFFDKQLLLIFGCLLVLTITKFFQFLYKFKEYKVIH  
YNILTLSMRHNQVTLVTCEILVHYLFVYKLLPVLHLCIIVLVWKL LTQSIEMLITGDFVIYIVIQL  
LLSFSCIYTEEVYITDHI ELLVLFELLVLLYYWLSVSVMFYLMDRCHYEVLQ LLLILLVLYLEGKI  
LLNSFEVVFLIMPLTDFLHYILYCLLYLLFCTLHFMILLVQAILLVFQVITIELHLLHIFYLKILLF

LYLFLYVLLYSLCLMFGIVIIILWLILCKLLLLLYLNDTYYLSMLFDLYLINYVLRCLVLFLLCYY  
LLQIVDLEVYNLDHLVKLSEFLLLISFCNVLNTLKIHLYYVNVLYYTLVILLYYLLVTHIVLIYLI  
NLNYFIKLTKYIKIIYIFYLRYYSILGFQFIIYIILCITLHLALANLLFPLVWNNDDLHWWFESKK  
EIRNIFLLLLLILFLKNIHFALPFSCIKMNDIKNKYLNYSYVILSYIATHIRSCINTCTCLISCSLCYSC  
KKNYGYAKKIRSCCRLLWTIASICCLKTFIKRICSSYTIYCSFLFRSCNNFNFCIIRLRCTLWSW  
FRDKRHEFRYILHVSCVIFSIRYSISWLKCEIRFSRFSKYSSINLINIKFSYINSNYDNRKFKFNCL  
YISKSYLIYTTFISCVYNIFHRIYSDKSSFFSRGPANLVWSGYMSQIARKPFYFKNKRQLAGNLIP  
NKYIIKLFIDTQFNIIYILFIYMIKDIVNHRCESTKKKHMGTPLGESELVSGFMTEHAAVVF  
VFFFLAEYGSIVLMCILTILFIGGYLLFEISYVFTVVNYIFFELFFIDVTFVEVQSLYTDFLNNSIIE  
GLLYGFNLGLKSSLMIFTFIARASFPRIKFDQLMGFCTVLLPINFAIIILVPCVLYSFNLLPVNIPLF  
LTHPPALLPQGYSTYEEGNRSRTILVNNTYTKTIYHTRECNYTLFLYSTLLAYYYLYMIIILLNL  
LGYINKKFVNFFHHFLIQNTNF

>YN359

ITILKNIKSYIKIIHLYSINLKGIFSILYLVLVLLFSLLQVFLLLGSLLNRWYARLLIKVISFYLLQYLV  
LEGFIILKKCSFIHILTINTKKLKIILLMVKLLIETIKYMLNLIQMLCLVLWQLFLLHFYYSCLIK  
NDVWVLYWYNLYLAINEYDIIYRVCICYSYFIFSHFYICSSSLSRKIYFRVWFPFRAKNTIRYKI  
LYFCFSLFTFRFRNIINFPRSVWCWYLSFSYFNFYSYNNYRIYIIRKRSNRQQTKIYTIERLPYR  
VCWNRGFKLRQKTKKPTKGLMGSYKKMITYIYSYIFTITRIIYIYIILLYIKIIIRYNYSILLY  
KNIYPIINFIFLIIFFYIMLTHLQMKRTKYCCYSSGYRKIFLYYLFLLGSFSVRGYMDGRRVFIL  
MNSGFKLTLFMNLNNTYINVGDRIMYSLRVKRDTPYNTYWFRVEYIYLRVKNIYIYIINIVI  
YWYGLNQVYILSFDKHLFFYLLLLLYCEINNYNILHSTYLGILSYLAINDSNQILFSLVWNNDL  
LIHWWFDSKKRVNNFLDQKYYFLQKAYAFHFFDKQLLLIFGCLLVLTITKFFQFLYKFKEYKVIH  
YNILTLMSMRHNQVTLVTCEILVHYLFVYKLLPVLHLCIIVLVWKLTTQSIEMITGDFVIYIYIQL  
LLSFSCIYTEEVYITDHIELLVLFELLVLLYYWLSVSVMFYLMDRCHYEVLQLLLILLVLYLEGKI  
LLNSFEVVFLIMPLTDFLHYILYCLLYLLFCTLHFMILLVQAILLVFQVITIELHLLHIFYLKILLF  
LYLFLYVLLYSLCLMFGIVIIILWLILCKLLLLLYLNDTYYLSMLFDLYLINYVLRCLVLFLLCYY  
LLQIVDLEVYNLDHLVKLSEFLLLISFCNVLNTLKIHLYYVNVLYYTLVILLYYLLVTHIVLIYLI  
NLNYFIKLTKYIKIIYIFYLRYYSILGFQFIIYIILCITLHLALANLLFPLVWNNDDLHWWFESKK  
EIRNIFLLLLLILFLKNIHFALPFSCIKMNDIKNKYLNYSYVILSYIATHIRSCINTCTCLISCSLCYSC  
KKNYGYAKKIRSCCRLLWTIASICCLKTFIKRICSSYTIYCSFLFRSCNNFNFCIIRLRCTLWSW  
FRDKRHEFRYILHVSCVIFSIRYSISWLKCEIRFSRFSKYSSINLINIKFSYINSNYDNRKFKFNCL  
YISKSYLIYTTFISCVYNIFHRIYSDKSSFFSRGPANLVWSGYMSQIARKPFYFKNKRQLAGNLIP  
NKYIIKLFIDTQFNIIYILFIYMIKDIVNHRCESTKKKHMGTPLGESELVSGFMTEHAAVVF  
VFFFLAEYGSIVLMCILTILFIGGYLLFEISYVFTVVNYIFFELFFIDVTFVEVQSLYTDFLNNSIIE  
GLLYGFNLGLKSSLMIFTFIARASFPRIKFDQLMGFCTVLLPINFAIIILVPCVLYSFNLLPVNIPLF  
LTHPPALLPQGYSTYEEGNRSRTILVNNTYTKTIYHTRECNYTLFLYSTLLAYYYLYMIIILLNL  
LGYINKKFVNFFHHFLIQNTNF

>YN365

ITILKNIKSYIKIIHLYSINLKGIFSILYLVLVLLFSLLQVFLLLGSLLNRWYARLLIKVISFYLLQYLV  
LEGFIILKKCSFIHILTINTKKLKIILLMVKLLIETIKYMLNLIQMLCLVLWQLFLLHFYYSCLIK  
NDVWVLYWYNLYLAINEYDIIYRVCICYSYFIFSHFYICSSSLSRKIYFRVWFPFRAKNTIRYKI  
LYFCFSLFTFRFRNIINFPRSVWCWYLSFSYFNFYSYNNYRIYIIRKRSNRQQTKIYTIERLPYR  
VCWNRGFKLRQKTKKPTKGLMGSYKKMITYIYSYIFTITRIIYIYIILLYIKIIIRYNYSILLY  
KNIYPIINFIFLIIFFYIMLTHLQMKRTKYCCYSSGYRKIFLYYLFLLGSFSVRGYMDGRRVFIL

MNSGFKLTLFMNLNYYINVGYDRIMYSLRVKRDTPYNTYWFRVEYIYLRVKNIYIQYIINIVI  
YWYGLNQVYILSFDKHLFFYLLLLLYCEINNYNIILHSTYLGILSYLAINDSNQILFSLVWNNDL  
LIHWFFDSKKRVNNFLDQKYYFLQKAYAFHFFDKQLLLIFGCLLVLTITKFFQFLYKFKEYKVIH  
YNILTLSMRHNQVTLVTCEILVHYLFVYKLLPVLHLCIIVLVWKLQTQSIEMITGDFVIYIVIQ  
LLSFSCIYTEEVYITDHIELLVLFELLVLLYYWLSVSVMFYLMDRCHYEVLQLLLILLVLYLEGKI  
LLNSFEVVFLIMPLTDFLHYILYCLLYLLFCTLHFMILLVQAILLVFQVITIELHLLHIFYLKILLF  
LYLFLYVLLYSLCCLMFGIVIIILWLILCKLLLLLYLNDTYYSMLFDLYLINYVLRCLVLFLLCY  
LLQIVDLEVYNLDHLVKLSEFLLISFCNVLNTLKIHLYYVNVLYYTLVILLYYLLVTIIVLIYLI  
NLNYFIKLTKYIKIIYIFYLRYYSILGFQFIIYIILCITLHLALANLLFPLVWNNDLLIHWFFESKK  
EIRNIFLLLLILFLKNIHFALPFSCIKMNDIKNKYLNYSYVILSYIATHIRSCINTCTCLISCSLCYSC  
KKNYGYAKKIRSCRLWTIASICCLKTFIKRICSSYTIYCSFLFRSCNNFNFCIIRLRCTLWSW  
FRDKRHEFRYILHVSCVIFSIRYSISWLKCEIRFSRFSKYSSINLINIKFSYINSNYDNRKFKFNCL  
YISKSYLIYTTFISCVYNIFHRIYSDKSSFFSRGPANLVWSGYMSQIARKPFYFKNKRQLAGNLIP  
NKYIIKLFIDTQFNIIYIFYIYMIKDIVNHRCESTKKKHMGTPLGESELVSGFMTEHA AVVF  
VFFFLAEYGSIVLMCILTILFIGGYLLFEISYVFTVVNYIFFELFFIDVTFVEVQSLYTDFLNNSIIE  
GLLYGFNLGLKSSLMIFTFIARASFPRIKFDQLMGFCTVLLPINFAIILVPCVLYSFNLLPVNIPLF  
LTHPPALLPQGYSTYEEGNRSRTILVNNYTYTKTIYHTRECNYTLFLYSTLLAYYYLYMIHLLNL  
LGYINKKFVNFFHHFLIQNTNF

>YN376

ITILKNIKSYIKIIHLYSINLKGIFSILYLVLLFSLLQVFLLLGSLNRWYARLLIKVISFYLLQYLV  
LEGFIILKKCSFIHLLTINTKKLKIILLMVKLLIETIKYMLNLIQMLCLVLWQLFLLHFYYSCLIK  
NDVWVLYWYNLYLAINEYDIIYRVCICYSYFIFSHFYICSSSLSRKIYFRVWFPFFRAKNTIRYKI  
LYFCFSLFTFRFRNIINFPFRSVCWYLWSFSYFNFYSYNNYRIYIIRKRSNRQQTKIIYTIERLPYR  
VCWNRGFVKLRQKTKKPTKGLMGSYKKMITYIYSYIYFTITRIIYIYIILYIKIIIRYNYSILLY  
KNIIYPIINFIFFLIIFFYIMLTHLQMKRTKYCCYSSGYRKIFLYYFLLGSFSVRGYMDGRRVFIL  
MNSGFKLTLFMNLNYYINVGYDRIMYSLRVKRDTPYNTYWFRVEYIYLRVKNIYIQYIINIVI  
YWYGLNQVYILSFDKHLFFYLLLLLYCEINNYNIILHSTYLGILSYLAINDSNQILFSLVWNNDL  
LIHWFFDSKKRVNNFLDQKYYFLQKAYAFHFFDKQLLLIFGCLLVLTITKFFQFLYKFKEYKVIH  
YNILTLSMRHNQVTLVTCEILVHYLFVYKLLPVLHLCIIVLVWKLQTQSIEMITGDFVIYIVIQ  
LLSFSCIYTEEVYITDHIELLVLFELLVLLYYWLSVSVMFYLMDRCHYEVLQLLLILLVLYLEGKI  
LLNSFEVVFLIMPLTDFLHYILYCLLYLLFCTLHFMILLVQAILLVFQVITIELHLLHIFYLKILLF  
LYLFLYVLLYSLCCLMFGIVIIILWLILCKLLLLLYLNDTYYSMLFDLYLINYVLRCLVLFLLCY  
LLQIVDLEVYNLDHLVKLSEFLLISFCNVLNTLKIHLYYVNVLYYTLVILLYYLLVTIIVLIYLI  
NLNYFIKLTKYIKIIYIFYLRYYSILGFQFIIYIILCITLHLALANLLFPLVWNNDLLIHWFFESKK  
EIRNIFLLLLILFLKNIHFALPFSCIKMNDIKNKYLNYSYVILSYIATHIRSCINTCTCLISCSLCYSC  
KKNYGYAKKIRSCRLWTIASICCLKTFIKRICSSYTIYCSFLFRSCNNFNFCIIRLRCTLWSW  
FRDKRHEFRYILHVSCVIFSIRYSISWLKCEIRFSRFSKYSSINLINIKFSYINSNYDNRKFKFNCL  
YISKSYLIYTTFISCVYNIFHRIYSDKSSFFSRGPANLVWSGYMSQIARKPFYFKNKRQLAGNLIP  
NKYIIKLFIDTQFNIIYIFYIYMIKDIVNHRCESTKKKHMGTPLGESELVSGFMTEHA AVVF  
VFFFLAEYGSIVLMCILTILFIGGYLLFEISYVFTVVNYIFFELFFIDVTFVEVQSLYTDFLNNSIIE  
GLLYGFNLGLKSSLMIFTFIARASFPRIKFDQLMGFCTVLLPINFAIILVPCVLYSFNLLPVNIPLF  
LTHPPALLPQGYSTYEEGNRSRTILVNNYTYTKTIYHTRECNYTLFLYSTLLAYYYLYMIHLLNL  
LGYINKKFVNFFHHFLIQNTNF

>YN390

ITILKNIKSYIKIIHLYSINLKGIFSILYLVLFFFSLQVFLLLGSLLNRWYARLLIKVISFYLLQYLV  
LEGFIILKKCSFIHLTINTKKLKIILLMVKLLIETIKYMLNLIQMLCLVLWQLFLLHFYYSCLIK  
NDVWVLYWYNLYLAINEYDIIYRVCICYSYFIFSHFYICSSSLSRKIYFRVWFPFFRAKNTIRYKI  
LYFCFSLFTFRFRNIINFPRSVCWYLSFSYFNFYSYNNYRIYIIRKRSNRQQTKIYTIERLPYR  
VCWNRGFVKLRQKTKKPTKGLMGSYKKMITYIYSYIFTITRIIYIYIILLYIKIIIRYNYSILLY  
KNIIYPIINFIFFLIIFFYIMLTHLQMKRTKYCCYSSGYRKIFLYYLFLLGSFSVRGYMDGRRVFIL  
MNSGFKLTLFMNLNYYNINVGYDRIMYSLRVKRDTPTYNTYWFRVEYIYLRVKNIYIYIINIVI  
YWYGLNQVYILSFDKHLFFYLLLLLYCEINNYYNIHSTYLGILSYLAINDSNQILFSLVWNNDL  
LIHWFFDSKKRVNNFLDQKYYFLQKAYAFHFFDKQLLLIFGCLLVLTITKFFQFLYKFKEYKVIH  
YNILTSMRHNQVTLVTCEILVHYLFVYKLLPVLHLCIIVLVWKLTTQSIEMLITGDFVIYIVIQL  
LLSFSCIYTEEVYITDHIELLVLFELLVLLYYWLSVSVMFYLMDRCHYEVLQLLLILLVLYLEGKI  
LLNSFEVVFLIMPLTDFLHYILYCLLYLLFCTLHFMILLVQAILLVFQVITIELHLLHIFYLKILLF  
LYLFLYVLLYSLCMLFGIVIIILWLILCKLLLLLYLNDTYYSMLFDLYLINYVLRCLVLFLLCYY  
LLQIVDLEVYNLDHLVKLSEFLLISFCNVLNTLKIHLYYVNVLYYTLVILLYYLLVTHIYLIYLI  
NLNYFIKLTKYIKIIYIFYLRYYSILGFQFIYIILCITLHLALANLLFPLVWNNDLLIHWFFESKK  
EIRNIFLLLLILFLKNIHFALPFSCIKMNDIKNKYLNYSYVILSYIATHIRSCINTCTCLISCSLCYSC  
KKNYGYAKKIRSCCRLLWTIASICCLKTFIKRICSSYTIYCSFLFRSCNNFNFCIIRLRCTLWSW  
FRDKRHEFRYILHVSCVIFSIRYSISWLKCEIRFSRFSKYSSINLINIKFSYINSNYDNRKFKFNCL  
YISKSYLIYTTFISCVYNIFHRIYSDKSSFFSRGPANLVWSGYMSQIARKPFYFKNKRQLAGNLIP  
NKYIIKLFIDTQFNIYIYLFYIMIKDIVNHRCESTKKKHMGTHLPLLGESELVSGFMTEHAAVVF  
VFFFLAEYGSIVLMCILTILFIGGYLLFEISYVFTVVNYIFFELFFIDVTFVEVQSLYTDFLNNSIIE  
GLLYGFNLGLKSSLMIFTFIARASFPRIKFDQLMGFCTVLLPINFAIILVPCVLYSFNLLPVNIPLF  
LTHPPALLPQGYSTYEEGNRSRTILVNNTYTKTIYHTRECNYTLFLYSTLLGYYYLYMIIILLNL  
LGYINKKFVNFFHHFLIQNTNF

>YN391

ITILKNIKSYIKIIHLYSINLKGIFSILYLVLFFFSLQVFLLLGSLLNRWYARLLIKVISFYLLQYLV  
LEGFIILKKCSFIHLTINTKKLKIILLMVKLLIETIKYMLNLIQMLCLVLWQLFLLHFYYSCLIK  
NDVWVLYWYNLYLAINEYDIIYRVCICYSYFIFSHFYICSSSLSRKIYFRVWFPFFRAKNTIRYKI  
LYFCFSLFTFRFRNIINFPRSVCWYLSFSYFNFYSYNNYRIYIIRKRSNRQQTKIYTIERLPYR  
VCWNRGFVKLRQKTKKPTKGLMGSYKKMITYIYSYIFTITRIIYIYIILLYIKIIIRYNYSILLY  
KNIIYPIINFIFFLIIFFYIMLTHLQMKRTKYCCYSSGYRKIFLYYLFLLGSFSVRGYMDGRRVFIL  
MNSGFKLTLFMNLNYYNINVGYDRIMYSLRVKRDTPTYNTYWFRVEYIYLRVKNIYIYIINIVI  
YWYGLNQVYILSFDKHLFFYLLLLLYCEINNYYNIHSTYLGILSYLAINDSNQILFSLVWNNDL  
LIHWFFDSKKRVNNFLDQKYYFLQKAYAFHFFDKQLLLIFGCLLVLTITKFFQFLYKFKEYKVIH  
YNILTSMRHNQVTLVTCEILVHYLFVYKLLPVLHLCIIVLVWKLTTQSIEMLITGDFVIYIVIQL  
LLSFSCIYTEEVYITDHIELLVLFELLVLLYYWLSVSVMFYLMDRCHYEVLQLLLILLVLYLEGKI  
LLNSFEVVFLIMPLTDFLHYILYCLLYLLFCTLHFMILLVQAILLVFQVITIELHLLHIFYLKILLF  
LYLFLYVLLYSLCMLFGIVIIILWLILCKLLLLLYLNDTYYSMLFDLYLINYVLRCLVLFLLCYY  
LLQIVDLEVYNLDHLVKLSEFLLISFCNVLNTLKIHLYYVNVLYYTLVILLYYLLVTHIYLIYLI  
NLNYFIKLTKYIKIIYIFYLRYYSILGFQFIYIILCITLHLALANLLFPLVWNNDLLIHWFFESKK  
EIRNIFLLLLILFLKNIHFALPFSCIKMNDIKNKYLNYSYVILSYIATHIRSCINTCTCLISCSLCYSC  
KKNYGYAKKIRSCCRLLWTIASICCLKTFIKRICSSYTIYCSFLFRSCNNFNFCIIRLRCTLWSW  
FRDKRHEFRYILHVSCVIFSIRYSISWLKCEIRFSRFSKYSSINLINIKFSYINSNYDNRKFKFNCL  
YISKSYLIYTTFISCVYNIFHRIYSDKSSFFSRGPANLVWSGYMSQIARKPFYFKNKRQLAGNLIP

NKYIIKLFIDTQFNIIYLFYIMIKDIVNHRCESTKKKHMGTPLLGESELVSGFMTEHAAVVF  
VFFFLAEYGSIVLMCILTILFIGGYLLFEISYVFTVVNYIFFELFFIDVTFVEVQSLYTDFLNNSIIE  
GLLYGFNLGLKSSLMIFTFIARASFPRIKFDQLMGFCTVLLPINFAIIILVPCVLYSFNLLPVNIPLF  
LTHPPALLPQGYSTYEEGNRSRTILVNNYTYTKTIYHTRECNYTLFLYSTLLAYYYLYMIIILLNL  
LGYINKKFVNFFHHFLIQNTNF

>YN397

ITILKNIKSYIKIIHLYSINLKGIFSILYLVLFFFSLQVFLLLGSLLNRWYARLLIKVISFYLLQYLV  
LEGFIILKKCSFIHILTINTKKLKIILLMVKLLIETIKYMLNLIQMLCLVLWQLFLLHFYYSCLIK  
NDVWVLYWYNLYLAINEYDIIYRVCICYSYFIFSHFYICSSSLSRKIYFRVWFPFRAKNTIRYKI  
LYFCFSLFTFRFRNIINFPRSVWCWYLSFSYFNFSYNRYIIRKRSNRQQTKIYTIERLPYR  
VCWNRGFVKLRQKTKKPTKGLMGSYKKMITYIYSYIFTITRIIYIYIILLYIKIIIRYNYSILLY  
KNIIYPIINFIFLIIFFYIMLTHLQMKRTKYCCYSSGYRKIFLYYFLLLGSFSVRGYMDGRRVFIL  
MNSGFKLTLFMNLNYYINVGYDRIMYSLRVKRDPTTYNTYWFRVEYIYLRVKNIYIYIINIVI  
YWYGLNQVYILSFDKHLFFYLLLLLYCEINNYYNIIHSTYLGILSYLAINDSNQILFSLVWNNDL  
LIHWFFDSKKRVNNFLDQKYYFLQKAYAFHFFDKQLLLIFGCLLVLTITKFFQFLYKFKEYKVIH  
YNILTLMSMRHNQVTLVTCEILVHYLFVYKLLPVLHLCIIVLVWKLTTQSIEMITGDFVIYIYIQL  
LLSFSCIYTEEVYITDHIELLVLFELLVLLYYWLSVSVMFYLMDRCHYEVLQLLLILLVLYLEGKI  
LLNSFEVVFLIMPLTDFLHYILYCLLYLLFCTLHFMILLVQAILLVFQVITIELHLLHIFYLKILLF  
LYLFLYVLLYSLCLMFGIVIIILWLILCKLLLLLYLNDTYYSMLFDLYLINYVLRCLVLFLLCYY  
LLQIVDLEVYNLDHLVKLSEFLLISFCNVLNTLKIHLYYVNVLYYTLVILLYYLLVTIIVLIYLI  
NLNYFIKLTKYIKIIYIFYLRYYSILGFQFIYIILCITLHLALANLLFPLVWNNDLLIHWFFESKK  
EIRNIFLLLLILFLKNIHFALPFSCIKMNDIKNKYLNYSYVILSYIATIRSCINTCTCLISCSLCYSC  
KKNYGYAKKIRSCRLWTIASICCLKTFIKRICSSYTIYCSFLFRSCNNFNFCIIRLRCYTLWSW  
FRDKRHEFRYILHVSCVIFSIRYSISWLKCEIRFSRFSKYSSINLINIKFSYINSNYDNRKFKFNCL  
YISKSYLIYTTFISCVYNIFHRIYSDKSSFFSRGPANLVWSGYMSQIARKPFYFKNKRQLAGNLIP  
NKYIIKLFIDTQFNIIYLFYIMIKDIVNHRCESTKKKHMGTPLLGESELVSGFMTEHAAVVF  
VFFFLAEYGSIVLMCILTILFIGGYLLFEISYVFTVVNYIFFELFFIDVTFVEVQSLYTDFLNNSIIE  
GLLYGFNLGLKSSLMIFTFIARASFPRIKFDQLMGFCTVLLPINFAIIILVPCVLYSFNLLPVNIPLF  
LTHPPALLPQGYSTYEEGNRSRTILVNNYTYTKTIYHTRECNYTLFLYSTLLAYYYLYMIIILLNL  
LGYINKKFVNFFHHFLIQNTNF

>YN398

ITILKNIKSYIKIIHLYSINLKGIFSILYLVLFFFSLQVFLLLGSLLNRWYARLLIKVISFYLLQYLV  
LEGFIILKKCSFIHILTINTKKLKIILLMVKLLIETIKYMLNLIQMLCLVLWQLFLLHFYYSCLIK  
NDVWVLYWYNLYLAINEYDIIYRVCICYSYFIFSHFYICSSSLSRKIYFRVWFPFRAKNTIRYKI  
LYFCFSLFTFRFRNIINFPRSVWCWYLSFSYFNFSYNRYIIRKRSNRQQTKIYTIERLPYR  
VCWNRGFVKLRQKTKKPTKGLMGSYKKMITYIYSYIFTITRIIYIYIILLYIKIIIRYNYSILLY  
KNIIYPIINFIFLIIFFYIMLTHLQMKRTKYCCYSSGYRKIFLYYFLLLGSFSVRGYMDGRRVFIL  
MNSGFKLTLFMNLNYYINVGYDRIMYSLRVKRDPTTYNTYWFRVEYIYLRVKNIYIYIINIVI  
YWYGLNQVYILSFDKHLFFYLLLLLYCEINNYYNIIHSTYLGILSYLAINDSNQILFSLVWNNDL  
LIHWFFDSKKRVNNFLDQKYYFLQKAYAFHFFDKQLLLIFGCLLVLTITKFFQFLYKFKEYKVIH  
YNILTLMSMRHNQVTLVTCEILVHYLFVYKLLPVLHLCIIVLVWKLTTQSIEMITGDFVIYIYIQL  
LLSFSCIYTEEVYITDHIELLVLFELLVLLYYWLSVSVMFYLMDRCHYEVLQLLLILLVLYLEGKI  
LLNSFEVVFLIMPLTDFLHYILYCLLYLLFCTLHFMILLVQAILLVFQVITIELHLLHIFYLKILLF  
LYLFLYVLLYSLCLMFGIVIIILWLILCKLLLLLYLNDTYYSMLFDLYLINYVLRCLVLFLLCYY

LLQIVDLEVYNLDHLVKLSEFLLISFCNVLNTLKIHLVYNVLYYTLVILLLYYLLVTIIVLIYLI  
NLNYFIKLTKYIKIIYIFYLRYYSILGFQFIIYIILCITLHLALANLLFPLVWNNDDLHWWFESKK  
EIRNIFLLLLLILFLKNIHFALPFSCIKMNDIKNKYLNYSYVILSYIATHIRSCINTCTCLISCSLCYSC  
KKNYGYAKKIRSCROLLWTIASICCLKTFIKRICSSYTIYCSFLFRSCNNFNFCIIRLRCTLWSW  
FRDKRHEFRYILHVSCVIFSIRYSISWLKCEIRFSRFSKYSSINLINIKFSYINSNYDNRKFKFNCL  
YISKSYLIYTTFISCVYNIFHRIYSDKSSFFSRGPANLVWSGYMSQIARKPFYFKNRQLAGNLIP  
NKYIILKFIDTQFNIIYILFIYMIKDIVNHRCESTKKKHMGTPLLLGESELVSGFMTEHA AVVF  
VFFFLAEYGSIVLMCILTILFIGGYLLFEISYVFTVVNYIFFELFFIDVTFVEVQSLYTDFLNNSIIE  
GLLYGFNLGLKSSLMIFTFIARASFPRIKFDQLMGFCTVLLPINFAIHLVPCVLYSFNLLPVNIPLF  
LTHPPALLPQGYSTYEEGNRSRTILVNNTYTYTKTIYHTRECNYTLFLYSTLLAYYYLYMIIILLNL  
LGYINKKFVNFFHHFLIQNTNF

>YN406

ITILKNIKSYIKIIHLYSINLKGIFSILYLVLFFFSLQVFLLLGSLLNRWYARLLIKVISFYLLQYLV  
LEGFIILKKCSFIHLLTINTKKLKIILLMVKLLIETIKYMLNLIQMLCLVLWQLFLLHFYYSCLIK  
NDVWVLYWYNLYLAINEYDIIYRVCICYSYFIFSHFYICSSLSRKIYFRVWFPFFRAKNTIRYKI  
LYFCFSLFTFRFRNIINFPRSVWCWYLSFSYFNFSYNNYRIYIIRKRSNRQQTKIIYTIERLPYR  
VCWNRGFVKLRQKTKKPTKGLMGSYKKMITYIYSYIFTITRIIYIYIILLYIKIIIRYNYSILLY  
KNIYPIINFIFLIIFFYIMLTHLQMKRTKYCCYSSGYRKIFLYYFLLLGSFSVRGYMDGRRVFIL  
MNSGFKLTLFMNLNNTYINVGYDRIMYSLRVKRDTPTYNTYWFRVEYIYLRVKNIYIYIINIVI  
YWYGLNQVYILSFDKHLFFYLLLLLYCEINNYNIILHSTYLGILSYLAINDSNQILFSLVWNNDL  
LIHWWFDSKKRVNNFLDQKYYFLQKAYAFHFFDKQLLLIFGCLLVLTITKFFQFLYKFKEYKVIH  
YNILTLMSMRHNQVTLVTCEILVHYLFVYKLLPVLHLCIIVLVWKLTTQSIEMITGDFVIYIYIQL  
LLSFSCIYTEEVYITDHIELLVLFELLVLLYYWLSVSVMFYLMDRCHYEVLQLLLILLVLYLEGKI  
LLNSFEVVFLIMPLTDFLHYILYCLLYLLFCTLHFMILLVQAILLVFQVITIELHLLHIFYLKILLF  
LYLFLYVLLYSLCLMFGIVIIILWLILCKLLLLLYLNDTYYSMLFDLYLINYVLRCLVLFLLCYY  
LLQIVDLEVYNLDHLVKLSEFLLISFCNVLNTLKIHLVYNVLYYTLVILLLYYLLVTIIVLIYLI  
NLNYFIKLTKYIKIIYIFYLRYYSILGFQFIIYIILCITLHLALANLLFPLVWNNDDLHWWFESKK  
EIRNIFLLLLLILFLKNIHFALPFSCIKMNDIKNKYLNYSYVILSYIATHIRSCINTCTCLISCSLCYSC  
KKNYGYAKKIRSCROLLWTIASICCLKTFIKRICSSYTIYCSFLFRSCNNFNFCIIRLRCTLWSW  
FRDKRHEFRYILHVSCVIFSIRYSISWLKCEIRFSRFSKYSSINLINIKFSYINSNYDNRKFKFNCL  
YISKSYLIYTTFISCVYNIFHRIYSDKSSFFSRGPANLVWSGYMSQIARKPFYFKNRQLAGNLIP  
NKYIILKFIDTQFNIIYILFIYMIKDIVNHRCESTKKKHMGTPLLLGESELVSGFMTEHA AVVF  
VFFFLAEYGSIVLMCILTILFIGGYLLFEISYVFTVVNYIFFELFFIDVTFVEVQSLYTDFLNNSIIE  
GLLYGFNLGLKSSLMIFTFIARASFPRIKFDQLMGFCTVLLPINFAIHLVPCVLYSFNLLPVNIPLF  
LTHPPALLPQGYSTYEEGNRSRTILVNNTYTYTKTIYHTRECNYTLFLYSTLLAYYYLYMIIILLNL  
LGYINKKFVNFFHHFLIQNTNY

>YN410

ITILKNIKSYIKIIHLYSINLKGIFSILYLVLFFFSLQVFLLLGSLLNRWYARLLIKVISFYLLQYLV  
LEGFIILKKCSFIHLLTINTKKLKIILLMVKLLIETIKYMLNLIQMLCLVLWQLFLLHFYYSCLIK  
NDVWVLYWYNLYLAINEYDIIYRVCICYSYFIFSHFYICSSLSRKIYFRVWFPFFRAKNTIRYKI  
LYFCFSLFTFRFRNIINFPRSVWCWYLSFSYFNFSYNNYRIYIIRKRSNRQQTKIIYTIERLPYR  
VCWNRGFVKLRQKTKKPTKGLMGSYKKMITYIYSYIFTITRIIYIYIILLYIKIIIRYNYSILLY  
KNIYPIINFIFLIIFFYIMLTHLQMKRTKYCCYSSGYRKIFLYYFLLLGSFSVRGYMDGRRVFIL  
MNSGFKLTLFMNLNNTYINVGYDRIMYSLRVKRDTPTYNTYWFRVEYIYLRVKNIYIYIINIVI

YWYGLNQVYILSFDKHLFFYLLLLLYCEINNYNIILHSTYLGILSYLAINDSNQILFSLVWNNDL  
LIHWFFDSKKRVNNFLDQKYYFLQKAYAFHFFDKQLLLIFGCLLVLTITKFFQFLYKFKEYKVIH  
YNILTSMRHNQVTLVTCEILVHYLFVYKLLPVLHLCIIVLVWKLTTQSIEMLITGDFVIYIVIQ  
LLSFSCIYTEEVYITDHIELLVLFELLVLLYYWLSVSVMFYLMDRCHYEVLQLLLILLVLYLEGKI  
LLNSFEVVFLLIMPLTDFLHYILYCLLYLLFCTLHFMILLVQAILLVFQVITIELHLLHIFYLKILLF  
LYLFLYVLLYSLCLMFGIVIIILWLILCKLLLLLYLNDTYYSMLFDLYLINYVLRCLVFLLCYY  
LLQIVDLEVYNLDHLVKLSEFLLISFCNVLNTLKIHLYYVNVLYYTLVILLYYLLVTHIVLIYLI  
NLNYFIKLTKYIKIIIIYIFYLRYYSILGFQFIIYIILCITLHLALANLLFPLVWNNDLLIHWFFESKK  
EIRNIFLLLLILFLKNIHFALPFSCIKMNDIKNKYLNYSYVILSYIATHIRSCINTCTCLISCSLCYSC  
KKNYGYAKKIRSCCRLWLTIASICCLKTFIKRICSSYTIYCSFLFRSCNNFNFCIIRLRCYTLWSW  
FRDKRHEFRYILHVSCVIFSIRYSISWLKCEIRFSRFSKYSSINLINIKFSYINSNYDNRKFKFNCL  
YISKSYLIYTTFISCVYNIFHRIYSDKSSFFSRGPANLVWSGYMSQIARKPFYFKNKRQLAGNLIP  
NKYIIKLFIDTQFNIYIYLFYIMIKDIVNHRCESTKKKHMGTPLGESELVSGFMTEHA AVVF  
VFFFLAEYGSIVLMCILTILFIGGYLLFEISYVFTVVNYIFFELFFIDVTFVEVQSLYTDFLNNSIIE  
GLLYGFNLGLKSSLMIFTFIARASFPRIKFDQLMGFCTVLLPINFAIIILVPCVLYSFNLLPVNIPLF  
LTHPPALLPQGYSTYEEGNRSRTILVNNYTYTKTIYHTRECNYTLFLYSTLLAYYYLYMIIILLNL  
LGYINKKFVNFFHHFLIQNTNF

>YN427

ITILKNIKSYIKIIHLYSINLKGIFSILYLVLFFFSLQVFLLLGSLLNRWYARLLIKVISFYLLQYLV  
LEGFIILKKCSFIHLTINTKKLKIILLMVKLLIETIKYMLNLIQMLCLVLWQLFLLHFYYSCLIK  
NDVWVLYWYNLYLAINEYDIIYRVCICYSYFIFSHFYICSSSLSRKIYFRVWFPFFRAKNTIRYKI  
LYFCFSLFTFRFRNIINFPRSVCWYLSFSYFNFYSYNNYRIYIIRKRSNRQQTKIYTIERLPYR  
VCWNRGFKLRQKTKKPTKGLMGSYKKMITYIYSYIIFTITRIIYIYIILLYIKIIIIIRYNYSILLY  
KNIYPIINFIFFLIIFFYIMLTHLQMKRTKYCCYSSGYRKIFLYYFLLGFSFSVRGYMDGRRVFIL  
MNSGFKLTLMNLNYYNINVGYDRIMYSLRVKRDTPYNTYWFRVEYIYLRVKNIYIYIINIVI  
YWYGLNQVYILSFDKHLFFYLLLLLYCEINNYNIILHSTYLGILSYLAINDSNQILFSLVWNNDL  
LIHWFFDSKKRVNNFLDQKYYFLQKAYAFHFFDKQLLLIFGCLLVLTITKFFQFLYKFKEYKVIH  
YNILTSMRHNQVTLVTCEILVHYLFVYKLLPVLHLCIIVLVWKLTTQSIEMLITGDFVIYIVIQ  
LLSFSCIYTEEVYITDHIELLVLFELLVLLYYWLSVSVMFYLMDRCHYEVLQLLLILLVLYLEGKI  
LLNSFEVVFLLIMPLTDFLHYILYCLLYLLFCTLHFMILLVQAILLVFQVITIELHLLHIFYLKILLF  
LYLFLYVLLYSLCLMFGIVIIILWLILCKLLLLLYLNDTYYSMLFDLYLINYVLRCLVFLLCYY  
LLQIVDLEVYNLDHLVKLSEFLLISFCNVLNTLKIHLYYVNVLYYTLVILLYYLLVTHIVLIYLI  
NLNYFIKLTKYIKIIIIYIFYLRYYSILGFQFIIYIILCITLHLALANLLFPLVWNNDLLIHWFFESKK  
EIRNIFLLLLILFLKNIHFALPFSCIKMNDIKNKYLNYSYVILSYIATHIRSCINTCTCLISCSLCYSC  
KKNYGYAKKIRSCCRLWLTIASICCLKTFIKRICSSYTIYCSFLFRSCNNFNFCIIRLRCYTLWSW  
FRDKRHEFRYILHVSCVIFSIRYSISWLKCEIRFSRFSKYSSINLINIKFSYINSNYDNRKFKFNCL  
YISKSYLIYTTFISCVYNIFHRIYSDKSSFFSRGPANLVWSGYMSQIARKPFYFKNKRQLAGNLIP  
NKYIIKLFIDTQFNIYIYLFYIMIKDIVNHRCESTKKKHMGTPLGESELVSGFMTEHA AVVF  
VFFFLAEYGSIVLMCILTILFIGGYLLFEISYVFTVVNYIFFELFFIDVTFVEVQSLYTDFLNNSIIE  
GLLYGFNLGLKSSLMIFTFIARASFPRIKFDQLMGFCTVLLPINFAIIILVPCVLYSFNLLPVNIPLF  
LTHPPALLPQGYSTYEEGNRSRTILVNNYTYTKTIYHTRECNYTLFLYSTLLAYYYLYMIIILLNL  
LGYINKKFVNFFHHFLIQNTNF

>YN435

ITILKNIKSYIKIIHLYSINLKGIFSILYLVLFFFSLQVFLLLGSLLNRWYARLLIKVISFYLLQYLV

LEGFIILKKCSFIHLTINTKKLKIILLMVKLLIETIKYMLNLIQMLCLVLWQLFLLHFYYSCLIK  
NDVWVLYWYNLYLAINEYDIIYRVCICYSYFIFSHFYICSSSLSRKIYFRVWFPFRAKNTIRYKI  
LYFCFSLFTFRFRNIINFPRSVCWYLSFSYFNFSYNNYRIYIIRKRSNRQQTKIYTIERLPYR  
VCWNRGFVKLRQKTKKPTKGLMGSYKKMITYIYSYYIFTITRIIYIYIILLYIKIIIRYNYSILLY  
KNIIYPIINFIFLIIFFYIMLTHLQMKRTKYCCYSSGYRKIFLYYLFLLGSFSVRGYMDGRRVFIL  
MNSGFKLTLFMNLNYNINVGYDRIMYSLRVKRDTPYNTYWFRVEYIYLRVKNIYIYIINIVI  
YWYGLNQVYILSFDKHLFFYLLLLLYCEINNYNILHSTYLGILSYLAINDSNQILFSLVWNNDL  
LIHWFFDSKKRVNFDQKYYFLQKAYAFHFFDKQLLLIFGCLLVLTITKFFQFLYKFKEYKVIH  
YNILTLSMRHNQVTLVTCEILVHYLFVYKLLPVLHLCIIVLVWKLTTQSIEMLITGDFVIYIYIQL  
LLSFSCIYTEEVYITDHIELLVLFELLVLLYYWLSVSVMFYLMDRCHYEVLQLLLILLVLYLEGKI  
LLNSFEVVFLIMPLTDFLHYILYCLLYLLFCTLHFMILLVQAILLVFQVITIELHLLHIFYLKILLF  
LYLFLYVLLYSLCLMFGIVIIILWLILCKLLLLLYLNDTYYSMLFDLYLINYVLRCLVLFLLCYY  
LLQIVDLEVYNLDHLVKLSEFLLISFCNVLNTLKIHLIYVNVLYYTLVILLYYLLVTIIVLIYLI  
NLNYFIKLTKYIKIIYIFYLRYYFSILGFQFIYIILCITLHLALANLLFPLVWNNDLLIHWFFESKK  
EIRNIFLLLLILFLKNIHFALPFSCIKMNDIKNKYLNYSYVILSYIATHIRSCINTCTCLISCSLCYSC  
KKNYGYAKKIRSCRLWTIASICCLKTFIKRICSSYTIYCSFLFRSCNNFNFCIIRLRCYTLWSW  
FRDKRHEFRYILHVSCVIFSIRYSISWLKCEIRFSRFSKYSSINLINIKFSYINSNYDNRKFKFNCL  
YISKSYLIYTTFISCVYNIFHRIYSDKSSFFSRGPANLVWSGYMSQIARKPFYFKNKRQLAGNLIP  
NKYIIKLFIDTQFNIYIYLFYIMIKDIVNHRCESTKKKHMGTPLGESELVSGFMTEHAAVVF  
VFFFLAEYGSIVLMCILTILFIGGYLLFEISYVFTVVNYIFFELFFIDVTFVEVQSLYTDFLNNSIIE  
GLLYGFNLGLKSSLMFTFIARASFPRIKFDQLMGFCTVLLPINFAIILVPCVLYSFNLLPVNIPLF  
LTHPPALLPQGYSTYEEGNRSRTILVNNYTYTKTIYHTRECNYTLFLYSTLLAYYYLYMIHLLNL  
LGYINKKFVNFFHHFLIQNTNF

>YN442

ITILKNIKSYIKIIHLYSINLKGIFSILYLVLFFFSLQVFLLLGSLLNRWYARLLIKVISFYLLQYLV  
LEGFIILKKCSFIHLTINTKKLKIILLMVKLLIETIKYMLNLIQMLCLVLWQLFLLHFYYSCLIK  
NDVWVLYWYNLYLAINEYDIIYRVCICYSYFIFSHFYICSSSLSRKIYFRVWFPFRAKNTIRYKI  
LYFCFSLFTFRFRNIINFPRSVCWYLSFSYFNFSYNNYRIYIIRKRSNRQQTKIYTIERLPYR  
VCWNRGFVKLRQKTKKPTKGLMGSYKKMITYIYSYYIFTITRIIYIYIILLYIKIIIRYNYSILLY  
KNIIYPIINFIFLIIFFYIMLTHLQMKRTKYCCYSSGYRKIFLYYLFLLGSFSVRGYMDGRRVFIL  
MNSGFKLTLFMNLNYNINVGYDRIMYSLRVKRDTPYNTYWFRVEYIYLRVKNIYIYIINIVI  
YWYGLNQVYILSFDKHLFFYLLLLLYCEINNYNILHSTYLGILSYLAINDSNQILFSLVWNNDL  
LIHWFFDSKKRVNFDQKYYFLQKAYAFHFFDKQLLLIFGCLLVLTITKFFQFLYKFKEYKVIH  
YNILTLSMRHNQVTLVTCEILVHYLFVYKLLPVLHLCIIVLVWKLTTQSIEMLITGDFVIYIYIQL  
LLSFSCIYTEEVYITDHIELLVLFELLVLLYYWLSVSVMFYLMDRCHYEVLQLLLILLVLYLEGKI  
LLNSFEVVFLIMPLTDFLHYILYCLLYLLFCTLHFMILLVQAILLVFQVITIELHLLHIFYLKILLF  
LYLFLYVLLYSLCLMFGIVIIILWLILCKLLLLLYLNDTYYSMLFDLYLINYVLRCLVLFLLCYY  
LLQIVDLEVYNLDHLVKLSEFLLISFCNVLNTLKIHLIYVNVLYYTLVILLYYLLVTIIVLIYLI  
NLNYFIKLTKYIKIIYIFYLRYYFSILGFQFIYIILCITLHLALANLLFPLVWNNDLLIHWFFESKK  
EIRNIFLLLLILFLKNIHFALPFSCIKMNDIKNKYLNYSYVILSYIATHIRSCINTCTCLISCSLCYSC  
KKNYGYAKKIRSCRLWTIASICCLKTFIKRICSSYTIYCSFLFRSCNNFNFCIIRLRCYTLWSW  
FRDKRHEFRYILHVSCVIFSIRYSISWLKCEIRFSRFSKYSSINLINIKFSYINSNYDNRKFKFNCL  
YISKSYLIYTTFISCVYNIFHRIYSDKSSFFSRGPANLVWSGYMSQIARKPFYFKNKRQLAGNLIP  
NKYIIKLFIDTQFNIYIYLFYIMIKDIVNHRCESTKKKHMGTPLGESELVSGFMTEHAAVVF

VFFFLAEYGSIVLMCILTSILFIGGYLLFEISYVFTVVNYIFFELFFIDVTFVEVQSLYTDFLNNSIIE  
GLLYGFNLGLKSSLMIFTFIARASFPRIKFDQLMGFCTVLLPINFAIHLVPCVLYSFNLLPVNIPLF  
LTHPPALLPQGYSTYEEGNRSRTILVNNTYTKTIYHTRECNYTLFLYSTLLAYYYLYMIIILLNL  
LGYINKKFVNFFHHFLIQNTNF

>YN455

ITILKNIKSYIKIIHLYSINLKGIFSILYLVLFFFSLQVFLLLGSLLNRWYARLLIKVISFYLLQYLV  
LEGFIHLKKCSFIHLTINTKKLKIILLMVKLLIETIKYMLNLIQMLCLVLWQLFLLHFYYSCLIK  
NDVWVLYWYNLYLAINEYDIIYRVCICYSYFIFSHFYICSSSLSRKIYFRVWFPFFRAKNTIRYKI  
LYFCFSLFTFRFRNIINFPRSVWCWYLSFSYFNFSYNNYRIYIIRKRSNRQQTKIIYTIERLPYR  
VCWNRGFVKLRQKTKKPTKGLMGSYKKMITYIYSYIFTITRIIYIYIILLYIKIIIRYNYSILLY  
KNIIYPIINFIFFLIIFFYIMLTHLQMKRTKYCCYSSGYRKIFLYYFLFGSFSVRGYMDGRRVFIL  
MNSGFKLTLFMNLNNTYINVGYDRIMYSLRVKRDTPYNTYWFRVEYIYLRVKNIYIYIINIVI  
YWYGLNQVYILSFDKHLFFYLLLLLYCEINNYYNIHSTYLGILSYLAINDSNQILFSLVWNNDL  
LIHWFFDSKKRVNNFLDQKYYFLQKAYAFHFFDKQLLLIFGCLLVLTITKFFQFLYKFKEYKVIH  
YNILTLNMRHNQVTLVTCEILVHYLFVYKLLPVLHLCIIVLVWKLTTQSIEMITGDFVIYIYIQL  
LLSFSCIYTEEVYITDHIELLVLFELLVLLYYWLSVSVMFYLMDRCHYEVLQLLLILLVLYLEGKI  
LLNSFEVVFLIMPLTDFLHYILYCLLYLLFCTLHFMILLVQAILLVFQVITIELHLLHIFYLKILLF  
LYLFLYVLLYSLCLMFIVIIILWLILCKLLLLLYLNDTYYSMLFDLYLINYVLRCLVFLLCYY  
LLQIVDLEVYNLDHLVKLSEFLLISFCNVLNTLKIHLYYVNVLYYTLVILLYYLLVTHIVLIYLI  
NLNYFIKLTKYIKIIYIFYLRYYSILGFQFIYIILCITLHLALANLLFPLVWNNDLLIHWFFESKK  
EIRNIFLLLLILFLKNIHFALPFCIKMNDIKNKYLNYSYVILSYIATHIRSCINTCTCLISCLCYSC  
KKNYGYAKKIRSCCRLLWTIASICCLKTFIKRICSSYTIYCSFLFRSCNNFNFCIIRLRCTLWSW  
FRDKRHEFRYILHVSCVIFSIRYSISWLKCEIRFSRFSKYSSINLINIKFSYINSNYDNRKFKFNCL  
YISKSYLIYTTFISCVYNIFHRIYSDKSSFFSRGPANLVWSGYMSQIARKPFYFKNKRQLAGNLIP  
NKYIIKLFIDTQFNIYIYLFYIMIKDIVNHRCESTKKKHMGTPLGESELVSGFMTEHAAVVF  
VFFFLAEYGSIVLMCILTSILFIGGYLLFEISYVFTVVNYIFFELFFIDVTFVEVQSLYTDFLNNSIIE  
GLLYGFNLGLKSSLMIFTFIARASFPRIKFDQLMGFCTVLLPINFAIHLVPCVLYSFNLLPVNIPLF  
LTHPPALLPQGYSTYEEGNRSRTILVNNTYTKTIYHTRECNYTLFLYSTLLAYYYLYMIIILLNL  
LGYINKKFVNFFHHFLIQNTNF

>YN460

ITILKNIKSYIKIIHLYSINLKGIFSILYLVLFFFSLQVFLLLGSLLNRWYARLLIKVISFYLLQYLV  
LEGFIHLKKCSFIHLTINTKKLKIILLMVKLLIETIKYMLNLIQMLCLVLWQLFLLHFYYSCLIK  
NDVWVLYWYNLYLAINEYDIIYRVCICYSYFIFSHFYICSSSLSRKIYFRVWFPFFRAKNTIRYKI  
LYFCFSLFTFRFRNIINFPRSVWCWYLSFSYFNFSYNNYRIYIIRKRSNRQQTKIIYTIERLPYR  
VCWNRGFVKLRQKTKKPTKGLMGSYKKMITYIYSYIFTITRIIYIYIILLYIKIIIRYNYSILLY  
KNIIYPIINFIFFLIIFFYIMLTHLQMKRTKYCCYSSGYRKIFLYYFLFGSFSVRGYMDGRRVFIL  
MNSGFKLTLFMNLNNTYINVGYDRIMYSLRVKRDTPYNTYWFRVEYIYLRVKNIYIYIINIVI  
YWYGLNQVYILSFDKHLFFYLLLLLYCEINNYYNIHSTYLGILSYLAINDSNQILFSLVWNNDL  
LIHWFFDSKKRVNNFLDQKYYFLQKAYAFHFFDKQLLLIFGCLLVLTITKFFQFLYKFKEYKVIH  
YNILTLNMRHNQVTLVTCEILVHYLFVYKLLPVLHLCIIVLVWKLTTQSIEMITGDFVIYIYIQL  
LLSFSCIYTEEVYITDHIELLVLFELLVLLYYWLSVSVMFYLMDRCHYEVLQLLLILLVLYLEGKI  
LLNSFEVVFLIMPLTDFLHYILYCLLYLLFCTLHFMILLVQAILLVFQVITIELHLLHIFYLKILLF  
LYLFLYVLLYSLCLMFIVIIILWLILCKLLLLLYLNDTYYSMLFDLYLINYVLRCLVFLLCYY  
LLQIVDLEVYNLDHLVKLSEFLLISFCNVLNTLKIHLYYVNVLYYTLVILLYYLLVTHIVLIYLI

NLNYFIKLT KYIKIIIYIFYLRYYSILGFQFIIYIILCITLHLALANLLFPLVWNNDLLIHWFFESKK  
EIRNIFLLLLILFLKNIHFALPFSCIKMNDIKNKYLNYSYVILSYIATHIRSCINTCTCLISCSLCYSC  
KKNYGYAKKIRSCCRLWLTIASICCLKTFIKRICSSYTIYCSFLFRSCNNFNFCIIRLRCYTLWSW  
FRDKRHEFRYILHVSCVIFSIRYSISWLKCEIRFSRFSKYSSINLINIKFSYINSNYDNRKFKFNCL  
YISKSYLIYTTFISCVYNIFHRIYSDKSSFFSRGPANLVWSGYMSQIARKPFYFKNKRQLAGNLIP  
NKYIIKLFIDTQFNIIYLFYIMIKDIVNHRCESTKKKHMGTLLPLLGESELVSGFMTEHAAVVF  
VFFFLAEYGSIVLMCILTILFIGGYLLFEISYVFTVVNYIFFELFFIDVTFVEVQSLYTDNFLNNSIIE  
GLLYGFNLGLKSSLMIFTFIARASFPRIKFDQLMGFCTVLLPINFAIIILVPCVLYSFNLLPVNIPLF  
LTHPPALLPQGYSTYEEGNRSRTILVNNYTYTKTIYHTRECNYTLFLYSTLLAYYYLYMIHLLNL  
LGYNKKFVNFFHHFLIQNTNF

>YN462

ITILKNIKSYIKIIHLYSINLKGIFSILYLVLFFFSLQVFLLLGSLLNRWYARLLIKVISFYLLQYLV  
LEGFIILKKCSFIHLTINTKKLKIILLMVKLLIETIKYMLNLIQMLCLVLWQLFLLHFYYSCLIK  
NDVWVLYWYNLYLAINEYDIIYRVCICYSYFIFSHFYICSSSLSRKIYFRVWFPFRAKNTIRYKI  
LYFCFSLFTFRFRNIINFPRSVCWYLSFSYFNFYSYNNYRIYIIRKRSNRQQTKIIYTIERLPYR  
VCWNRGFVKLRQKTKKPTKGLMGSYKKMITYIYSYIFTITRIIYIYIILLYIKIIIRYNYSILLY  
KNIIYPIINFIFLIIFFYIMLTHLQMKRTKYCCYSSGYRKIFLYYFLLLGSFSVRGYMDGRRVFIL  
MNSGFKLTLFMNLNYYINVGYDRIMYSLRVKRDTPYNTYWFRVEYIYLRVKNIYIYIINIVI  
YWYGLNQVYILSFDKHLFFYLLLLLYCEINNYYNIIHSTYLGILSYLAINDSNQILFSLVWNNDL  
LIHWFFDSKKRVNNFLDQKYYFLQKAYAFHFFDKQLLLIFGCLLVLTITKFFQFLYKFKEYKVIH  
YNILTLSMRHNVTLVTCEILVHYLFVYKLLPVLHLCIIVLVWKLTTQSIEMITGDFVIYIYIQL  
LLSFSCIYTEEVYITDHIELLVLFELLVLLYYWLSVSVMFYLMDRCHYEVLQLLLILLVLYLEGKI  
LLNSFEVVFLIMPLTDFLHYILYCLLYLLFCTLHFMILLVQAILLVFQVITIELHLLHIFYLKILLF  
LYLFLYVLLYSLCMLFGIVIIHLWLILCKLLLLLYLNDTYYSMLFDLYLINYVLRCLVLFLLCYY  
LLQIVDLEVYNLDHLVKLSEFLLISFCNVLNTLKIHLYYVNVLYYTLVILLLYYLLVTIIVLIYLI  
NLNYFIKLT KYIKIIIYIFYLRYYSILGFQFIIYIILCITLHLALANLLFPLVWNNDLLIHWFFESKK  
EIRNIFLLLLILFLKNIHFALPFSCIKMNDIKNKYLNYSYVILSYIATHIRSCINTCTCLISCSLCYSC  
KKNYGYAKKIRSCCRLWLTIASICCLKTFIKRICSSYTIYCSFLFRSCNNFNFCIIRLRCYTLWSW  
FRDKRHEFRYILHVSCVIFSIRYSISWLKCEIRFSRFSKYSSINLINIKFSYINSNYDNRKFKFNCL  
YISKSYLIYTTFISCVYNIFHRIYSDKSSFFSRGPANLVWSGYMSQIARKPFYFKNKRQLAGNLIP  
NKYIIKLFIDTQFNIIYLFYIMIKDIVNHRCESTKKKHMGTLLPLLGESELVSGFMTEHAAVVF  
VFFFLAEYGSIVLMCILTILFIGGYLLFEISYVFTVVNYIFFELFFIDVTFVEVQSLYTDNFLNNSIIE  
GLLYGFNLGLKSSLMIFTFIARASFPRIKFDQLMGFCTVLLPINFAIIILVPCVLYSFNLLPVNIPLF  
LTHPPALLPQGYSTYEEGNRSRTILVNNYTYTKTIYHTRECNYTLFLYSTLLAYYYLYMIHLLNL  
LGYNKKFVNFFHHFLIQNTNF

>YN463

ITILKNIKSYIKIIHLYSINLKGIFSILYLVLFFFSLQVFLLLGSLLNRWYARLLIKVISFYLLQYLV  
LEGFIILKKCSFIHLTINTKKLKIILLMVKLLIETIKYMLNLIQMLCLVLWQLFLLHFYYSCLIK  
NDVWVLYWYNLYLAINEYDIIYRVCICYSYFIFSHFYICSSSLSRKIYFRVWFPFRAKNTIRYKI  
LYFCFSLFTFRFRNIINFPRSVCWYLSFSYFNFYSYNNYRIYIIRKRSNRQQTKIIYTIERLPYR  
VCWNRGFVKLRQKTKKPTKGLMGSYKKMITYIYSYIFTITRIIYIYIILLYIKIIIRYNYSILLY  
KNIIYPIINFIFLIIFFYIMLTHLQMKRTKYCCYSSGYRKIFLYYFLLLGSFSVRGYMDGRRVFIL  
MNSGFKLTLFMNLNYYINVGYDRIMYSLRVKRDTPYNTYWFRVEYIYLRVKNIYIYIINIVI  
YWYGLNQVYILSFDKHLFFYLLLLLYCEINNYYNIIHSTYLGILSYLAINDSNQILFSLVWNNDL

LIHWFFDSKKRVNNFLDQKYYFLQKAYAFHFFDKQLLLIFGCLLVLTITKFFQFLYKFKEYKVIH  
YNILTLSMRHNQVTLVTCEILVHYLFVYKLLPVLHLCIIVLVWKLLTQSIEMLITGDFVIYIVIQL  
LLSFSCIYTEEVYITDHIELLVLFELLVLLYYWLSVSVMFYLMDRCHYEVLQLLLILLVLYLEGKI  
LLNSFEVVFLIMPLTDFLHYILYCLLYLLFCTLHFMILLVQAILLVFQVITIELHLLHIFYLKILLF  
LYLFLYVLLYSLCCLMFQIVIIIWLILCKLLLLLYLNDTYYSMLFDLYLINYVLRCLVLFLLCYY  
LLQIVDLEVYNLDHLVKLSEFLLISFCNVLNTLKIHLYYVNVLYYTLVILLYYLLVTIIVLIYLI  
NLNYFIKLTKEYIKIIYIFYLRYYFSILGFQFIYIILCITLHLALANLLFPLVWNNDDLHWWFESKK  
EIRNIFLLLLILFLKNIHFALPFSCIKMNDIKNKYLNYSYVILSYIATHIRSCINTCTCLISCSLCYSC  
KKNYGYAKKIRSCCRLLWTIASICCLKTFIKRICSSYTIYCSFLFRSCNNFNFCIIRLRCTLWSW  
FRDKRHEFRYILHVSCVIFSIRYSISWLKCEIRFSRFSKYSSINLINIKFSYINSNYDNRKFKFNCL  
YISKSYLIYTTFISCVYNIFHRIYSDKSSFFSRGPANLVWSGYMSQIARKPFYFKNKRQLAGNLIP  
NKYIIKLFIDTQFNIYIYLFYIMIKDIVNHRCESTKKKHMGTHLPLLGESELVSGFMTEHA AVVF  
VFFFLAEYGSIVLMCILTSLFIGGYLLFEISYVFTVVNYIFFELFFIDVTFVEVQSLYTDFLNNIIIE  
GLLYGFNLGLKSSLMIFTFIARASFPRIREFDQLMGFCTVLLPINFAIIILVPCVLYSFNLLPVNIPLF  
LTHPPALLPQGYSTYEEGNRSRTILVNNYTYTKTIYHTRECNYTLFLYSTLLAYYYLYMIIILLNL  
LGYINKKFVNFFHHFLIQNTNF

>YN468

ITILKNIKSYIKIIHLYSINLKGIFSILYLVLFFFSLQVFLLLGSLLNRWYARLLIKVISFYLLQYLV  
LEGFIILKKCSFIHLTINTKKLKIILLMVKLLIETIKYMLNLIQMLCLVLWQLFLLHFYYSCLIK  
NDVWVLYWYNLYLAINEYDIIYRVCICYSYFIFSHFYICSSSLSRKIYFRVWFPFRAKNTIRYKI  
LYFCFSLFTFRFRNIINFPRSVCWYLSFSYFNFSYNNYRIYIIRKRSNRQQTKIYTIERLPYR  
VCWNRGFVKLRQKTKKPTKGLMGSYKKMITYIYSYIFTITRIIYIYIILLYIKIIIRYNYSILLY  
KNIIYPIINFIFLIIFFYIMLTHLQMKRTKYCCYSSGYRKIFLYYLFLLGSFSVRGYMDGRRVFIL  
MNSGFKLTLMFNLYNNYINVGYDRIMYSLRVKRDTPTYNTYWFRVEYIYLRVKNIYIYIINIVI  
YWYGLNQVYILSFDKHLFFYLLLLLYCEINNYYNIILHSTYLGILSYLAINDSNQILFSLVWNNDL  
LIHWFFDSKKRVNNFLDQKYYFLQKAYAFHFFDKQLLLIFGCLLVLTITKFFQFLYKFKEYKVIH  
YNILTLSMRHNQVTLVTCEILVHYLFVYKLLPVLHLCIIVLVWKLLTQSIEMLITGDFVIYIVIQL  
LLSFSCIYTEEVYITDHIELLVLFELLVLLYYWLSVSVMFYLMDRCHYEVLQLLLILLVLYLEGKI  
LLNSFEVVFLIMPLTDFLHYILYCLLYLLFCTLHFMILLVQAILLVFQVITIELHLLHIFYLKILLF  
LYLFLYVLLYSLCCLMFQIVIIIWLILCKLLLLLYLNDTYYSMLFDLYLINYVLRCLVLFLLCYY  
LLQIVDLEVYNLDHLVKLSEFLLISFCNVLNTLKIHLYYVNVLYYTLVILLYYLLVTIIVLIYLI  
NLNYFIKLTKEYIKIIYIFYLRYYFSILGFQFIYIILCITLHLALANLLFPLVWNNDDLHWWFESKK  
EIRNIFLLLLILFLKNIHFALPFSCIKMNDIKNKYLNYSYVILSYIATHIRSCINTCTCLISCSLCYSC  
KKNYGYAKKIRSCCRLLWTIASICCLKTFIKRICSSYTIYCSFLFRSCNNFNFCIIRLRCTLWSW  
FRDKRHEFRYILHVSCVIFSIRYSISWLKCEIRFSRFSKYSSINLINIKFSYINSNYDNRKFKFNCL  
YISKSYLIYTTFISCVYNIFHRIYSDKSSFFSRGPANLVWSGYMSQIARKPFYFKNKRQLAGNLIP  
NKYIIKLFIDTQFNIYIYLFYIMIKDIVNHRCESTKKKHMGTHLPLLGESELVSGFMTEHA AVVF  
VFFFLAEYGSIVLMCILTSLFIGGYLLFEISYVFTVVNYIFFELFFIDVTFVEVQSLYTDFLNNIIIE  
GLLYGFNLGLKSSLMIFTFIARASFPRIREFDQLMGFCTVLLPINFAIIILVPCVLYSFNLLPVNIPLF  
LTHPPALLPQGYSTYEEGNRSRTILVNNYTYTKTIYHTRECNYTLFLYSTLLAYYYLYMIIILLNL  
LGYINKKFVNFFHHFLIQNTNF

>YN476

ITILKNIKSYIKIIHLYSINLKGIFSILYLVLFFFSLQVFLLLGSLLNRWYARLLIKVISFYLLQYLV  
LEGFIILKKCSFIHLTINTKKLKIILLMVKLLIETIKYMLNLIQMLCLVLWQLFLLHFYYSCLIK

NDVWVLYWYNLYLAINEYDIIYRVCICYSYFIFSHFYICSSSLSRKIYFRVWFPFFRAKNTIRYKI  
LYFCFSLFTFRFRNIINFPRSVCWYLSFSYFNFYSYNNYRIYIIRKRSNRQQTKIYTIERLPYR  
VCWNRGFVKLRQKTKKPTKGLMGSYKKMITYIYSYIYFTITRIIYIYIILLYIKIIIRYNYSILLY  
KNIYPIINFIFFLIIFFYIMLTHLQMKRTKYCCYSSGYRKIFLYYFLLLGSFSVRGYMDGRRVFIL  
MNSGFKLTLFMNLNynyINVGyDRIMYSLRVKRDTPTYNTYWFRVEYIYLRVKNIYIQYIINIVI  
YWYGLNQVYILSFDKHLFFYLLLLLYCEINNynIILHSTYLGILSYLAINDSNQILFSLVWNNDL  
LIHWFFDSKKRVNNFLDQKYFFLQKAYAFHFFDKQLLLIFGCLLVLTITKFFQFLYKFKEYKVIH  
YNILTLSMRHNQVTLVTCEILVHYLFVYKLLPVLHLCIIVLVWKLTTQSIEMLITGDFVIYIYIQL  
LLSFSCIYTEEVYITDHIELLVLFELLVLLYYWLSVSVMFYLMDRCHYEVLQLLLILLVLYLEGKI  
LLNSFEVVFLIMPLTDFLHYILYCLLYLLFCTLHFMILLVQAILLVFQVITIELHLLHIFYLKILLF  
LYLFLYVLLYSLCLMFGIVIIILWLILCKLLLLLYLNDTYYLSMLFDLYLINYVLRCLVFLLCYY  
LLQIVDLEVYNLDHLVKLSEFLLISFCNVLNTLKIHLYYVNVLYYTLVILLYYLLVTHIVLIYLI  
NLNYFIKLTKYIKIIYIFYLRYYFSILGFQFIYIILCITLHLALANLLFPLVWNNDLLIHWFFESKK  
EIRNIFLLLLILFLKNIHFALPFSCIKMNDIKNKYLNYSYVILSYIATHIRSCINTCTCLISCSLCYSC  
KKNYGYAKKIRSCCRLLWTIASICCLKTFIKRICSSYTIYCSFLFRSCNNFNFCIIRLRCYTLWSW  
FRDKRHEFRYILHVSCVIFSIRYSISWLKCEIRFSRFSKYSSINLINIKFSYINSNYDNRKFKFNCL  
YISKSYLIYTTFISCVYNIFHRIYSDKSSFFSRGPANLVWSGYMSQIARKPFYFKNKRQLAGNLIP  
NKYIIKLFIDTQFNIYIYLFYIMIKDIVNHRCESTKKKHMGTPLGSELVSGFMTEHAAVVF  
VFFFLAEYGSIVLMCILTSILFIGGYLLFEISYVFTVVNYIFFELFFIDVTFVEVQSLYTDFLNNIIE  
GLLYGFNLGLKSSLMIFTFIARASFPRIKFDQLMGFCTVLLPINFAIIILVPCVLYSFNLLPVNIPLF  
LTHPPALLPQGYSTYEEGNRSRTILVNNTYTKTIYHTRECNYTLFLYSTLLGYYYLYMIIILLNL  
LGYNKKKFVNFFHHFLIQNTNF

>YN477

ITILKNIKSYIKIIHLYSINLKGIFSILYLVLFFFSLQVFLLLGSLLNRWYARLLIKVISFYLLQYLV  
LEGFIIILKKCSFIHLTINTKKLKIIILLMVKLLIETIKYMLNLIQMCLVLWQLFLLLHFYYSCLIK  
NDVWVLYWYNLYLAINEYDIIYRVCICYSYFIFSHFYICSSSLSRKIYFRVWFPFFRAKNTIRYKI  
LYFCFSLFTFRFRNIINFPRSVCWYLSFSYFNFYSYNNYRIYIIRKRSNRQQTKIYTIERLPYR  
VCWNRGFVKLRQKTKKPTKGLMGSYKKMITYIYSYIYFTITRIIYIYIILLYIKIIIRYNYSILLY  
KNIYPIINFIFFLIIFFYIMLTHLQMKRTKYCCYSSGYRKIFLYYFLLLGSFSVRGYMDGRRVFIL  
MNSGFKLTLFMNLNynyINVGyDRIMYSLRVKRDTPTYNTYWFRVEYIYLRVKNIYIQYIINIVI  
YWYGLNQVYILSFDKHLFFYLLLLLYCEINNynIILHSTYLGILSYLAINDSNQILFSLVWNNDL  
LIHWFFDSKKRVNNFLDQKYFFLQKAYAFHFFDKQLLLIFGCLLVLTITKFFQFLYKFKEYKVIH  
YNILTLSMRHNQVTLVTCEILVHYLFVYKLLPVLHLCIIVLVWKLTTQSIEMLITGDFVIYIYIQL  
LLSFSCIYTEEVYITDHIELLVLFELLVLLYYWLSVSVMFYLMDRCHYEVLQLLLILLVLYLEGKI  
LLNSFEVVFLIMPLTDFLHYILYCLLYLLFCTLHFMILLVQAILLVFQVITIELHLLHIFYLKILLF  
LYLFLYVLLYSLCLMFGIVIIILWLILCKLLLLLYLNDTYYLSMLFDLYLINYVLRCLVFLLCYY  
LLQIVDLEVYNLDHLVKLSEFLLISFCNVLNTLKIHLYYVNVLYYTLVILLYYLLVTHIVLIYLI  
NLNYFIKLTKYIKIIYIFYLRYYFSILGFQFIYIILCITLHLALANLLFPLVWNNDLLIHWFFESKK  
EIRNIFLLLLILFLKNIHFALPFSCIKMNDIKNKYLNYSYVILSYIATHIRSCINTCTCLISCSLCYSC  
KKNYGYAKKIRSCCRLLWTIASICCLKTFIKRICSSYTIYCSFLFRSCNNFNFCIIRLRCYTLWSW  
FRDKRHEFRYILHVSCVIFSIRYSISWLKCEIRFSRFSKYSSINLINIKFSYINSNYDNRKFKFNCL  
YISKSYLIYTTFISCVYNIFHRIYSDKSSFFSRGPANLVWSGYMSQIARKPFYFKNKRQLAGNLIP  
NKYIIKLFIDTQFNIYIYLFYIMIKDIVNHRCESTKKKHMGTPLGSELVSGFMTEHAAVVF  
VFFFLAEYGSIVLMCILTSILFIGGYLLFEISYVFTVVNYIFFELFFIDVTFVEVQSLYTDFLNNIIE

GLLYGFNLGLKSSLMIFTFIARASFPRIKFDQLMGFCTVLLPINFAIHLVPCVLYSFNLLPVNIPLF  
LTHPPALLPQGYSTYEEGNRSRTILVNNTYTKTIYHTRECNYTLFLYSTLLGYYYLYMIHLLNL  
LGYINKKFVNFFHHFLIQNTNF

>YN480

ITILKNIKSYIKIIHLYSINLKGIFSILYLVLFFFSLQVFLLLGSLLNRWYARLLIKVISFYLLQYLV  
LEGFIHLKKCSFIHLTINTKKLKIILLMVKLLIETIKYMLNLIQMLCLVLWQLFLLHFYYSCLIK  
NDVWVLYWYNLYLAINEYDIIYRVCICYSYFIFSHFYICSSSLSRKIYFRVWFPFFRAKNTIRYKI  
LYFCFSLFTFRFRNIINFPRSVCWYLSFSYFNFSYNNYRIYIIRKRSNRQQTKIYTIERLPYR  
VCWNRGFVKLRQKTKKPTKGLMGSYKKMITYIYSYIFTITRIIYIYIILLYIKIIIRYNYSILLY  
KNIIYPIINFIFLIIFFYIMLTHLQMKRTKYCCYSSGYRKIFLYYFLLLGSFSVRGYMDGRRVFIL  
MNSGFKLTLFMNLNNTYINVGYDRIMYSLRVKRDPTTYNTYWFRVEYIYLRVKNIYIYIINIVI  
YWYGLNQVYILSFDKHLFFYLLLLLYCEINNNTIILHSTYLGILSYLAINDSNQILFSLVWNNDL  
LIHWFFDSKKRVNFDQKYYFLQKAYAFHFFDKQLLLIFGCLLVLTITKFFQFLYKFKEYKVIH  
YNILTLNMRHNQVTLVTCEILVHYLFVYKLLPVLHLCIIVLVWKLTTQSIEMITGDFVIYIYIQL  
LLSFSCIYTEEVYITDHIELLVLFELLVLLYYWLSVSVMFYLMDRCHYEVLQLLLILVLVYLEGKI  
LLNSFEVVFLIMPLTDFLHYILYCLLYLLFCTLHFMILLVQAILLVFQVITIELHLLHIFYLKILLF  
LYLFLYVLLYSLCLMFGIVIIILWLILCKLLLLLYLNDTYYSMLFDLYLINYVLRCLVLFLLCYY  
LLQIVDLEVYNLDHLVKLSEFLLISFCNVLNTLKIHLIYVNVLYYTLVILLLYYLLVTIIVLIYLI  
NLNYFIKLTKYIKIIYIFYLRYYSILGFQFIYIILCITLHLALANLLFPLVWNNDLLIHWFFESKK  
EIRNIFLLLLILFLKNIHFALPFSCIKMNDIKNKYLNYSYVILSYIATHIRSCINTCTCLISCSLCYSC  
KKNYGYAKKIRSCRLWTIASICCLKTFIKRICSSYTIYCSFLFRSCNNFNFCIIRLCYTLWSW  
FRDKRHEFRYILHVSCVIFSIRYISWLKCEIRFSRFSKYSSINLINIKFSYINSNYDNRKFKFNCL  
YISKSYLIYTTFISCVYNIFHRIYSDKSSFFSRGPANLVWSGYMSQIARKPFYFKNKRQLAGNLIP  
NKYIIKLFIDTQFNIYIYLFYMIKDIVNHRCESTKKKHMGTPLGESELVSGFMTEHAAVVF  
VFFFLAEYGSIVLMCILTILFIGGYLLFEISYVFTVVNYIFFELFFIDVTFVEVQSLYTDFLNNIIE  
GLLYGFNLGLKSSLMIFTFIARASFPRIKFDQLMGFCTVLLPINFAIHLVPCVLYSFNLLPVNIPLF  
LTHPPALLPQGYSTYEEGNRSRTILVNNTYTKTIYHTRECNYTLFLYSTLLAYYYLYMIHLLNL  
LGYINKKFVNFFHHFLIQNTNF

>YN485

ITILKNIKSYIKIIHLYSINLKGIFSILYLVLFFFSLQVFLLLGSLLNRWYARLLIKVISFYLLQYLV  
LEGFIHLKKCSFIHLTINTKKLKIILLMVKLLIETIKYMLNLIQMLCLVLWQLFLLHFYYSCLIK  
NDVWVLYWYNLYLAINEYDIIYRVCICYSYFIFSHFYICSSSLSRKIYFRVWFPFFRAKNTIRYKI  
LYFCFSLFTFRFRNIINFPRSVCWYLSFSYFNFSYNNYRIYIIRKRSNRQQTKIYTIERLPYR  
VCWNRGFVKLRQKTKKPTKGLMGSYKKMITYIYSYIFTITRIIINIYIILLYIKIIIRYNYSILLY  
KNIIYPIINFIFLIIFFYIMLTHLQMKRTKYCCYSSGYRKIFLYYFLLLGSFSVRGYMDGRRVFIL  
MNSGFKLTLFMNLNNTYINVGYDRIMYSLRVKRDPTTYNTYWFRVEYIYLRVKNIYIYIINIVI  
YWYGLNQVYILSFDKHLFFYLLLLLYCEINNNTIILHSTYLGILSYLAINDSNQILFSLVWNNDL  
LIHWFFDSKKRVNFDQKYYFLQKAYAFHFFDKQLLLIFGCLLVLTITKFFQFLYKFKEYKVIH  
YNILTLNMRHNQVTLVTCEILVHYLFVYKLLPVLHLCIIVLVWKLTTQSIEMITGDFVIYIYIQL  
LLSFSCIYTEEVYITDHIELLVLFELLVLLYYWLSVSVMFYLMDRCHYEVLQLLLILVLVYLEGKI  
LLNSFEVVFLIMPLTDFLHYILYCLLYLLFCTLHFMILLVQAILLVFQVITIELHLLHIFYLKILLF  
LYLFLYVLLYSLCLMFGIVIIILWLILCKLLLLLYLNDTYYSMLFDLYLINYVLRCLVLFLLCYY  
LLQIVDLEVYNLDHLVKLSEFLLISFCNVLNTLKIHLIYVNVLYYTLVILLLYYLLVTIIVLIYLI  
NLNYFIKLTKYIKIIYIFYLRYYSILGFQFIYIILCITLHLALANLLFPLVWNNDLLIHWFFESKK

EIRNIFLLLLILFLKNIHFALPFSCIKMNDIKNKYLNYSYVILSYIATHIRSCINTCTCLISCSLCYSC  
KKNYGYAKKIRSCCRLWLTIASICCLKTFIKRICSSYTIYCSFLFRSCNNFNFCIIRLRCTLWSW  
FRDKRHEFRYILHVSCVIFSIRYSISWLKCEIRFSRFSKYSSINLINIKFSYINSNYDNRKFKFNCL  
YISKSYLIYTTFISCVYNIFHRIYSDKSSFFSRGPANLVWSGYMSQIARKPFYFKNKRQLAGNLIP  
NKYIIKLFIDTQFNIYIYLFYIMIKDIVNHRCESTKKKHMGTPLLGESELVSGFMTEHA AVVF  
VFFFLAEYGSIVLMCILTILFIGGYLLFEISYVFTVVNYIFFELFFIDVTFVEVQSLYTDFLNNSIIE  
GLLYGFNLGLKSSLMIFTFIARASFPRIREFDQLMGFCTVLLPINFAIIILVPCVLYSFNLLPVNIPLF  
LTHPPALLPQGYSTYEEGNRSRTILVNNTYTKTIYHTRECNYTLFLYSTLLAYYYLYMIIILLNL  
LGYINKKFVNFFHHFLIQNTNF

>YN487

ITILKNIKSYIKIIHLYSINLKGIFSILYLVLFFFSLQVFLLLGSLLNRWYARLLIKVISFYLLQYLV  
LEGFIILKKCSFIHILTINTKKLKIILLMVKLLIETIKYMLNLIQMLCLVLWQLFLLHFYYSCLIK  
NDVWVLYWYNLYLAINEYDIIYRVCICYSYFIFSHFYICSSSLRKIYFRVWFPFRAKNTIRYKI  
LYFCFSLFTFRFRNIINFPRSVCWYLSFSYFNFSYNRYIIRKRSNRQQTKIYTIERLPYR  
VCWNRGFVKLRQKTKKPTKGLMGSYKKMITYIYSYIFTITRIIYIYIILLYIKIIIRYNYSILLY  
KNIIYPIINFIFFLIIFFYIMLTHLQMKRTKYCCYSSGYRKIFLYYFLFGSFSVRGYMDGRRVFIL  
MNSGFKLTLFMNLNYNYNVGYDRIMYSLRVKRDTPYNTYWFRVEYIYLRVKNIYIYIINIVI  
YWYGLNQVYILSFDKHLFFYLLLLLYCEINNYNILHSTYLGILSYLAINDSNQILFSLVWNNDL  
LIHWFFDSKKRVNNFLDQKYYFLQKAYAFHFFDKQLLLIFGCLLVLTITKFFQFLYKFKEYKVIH  
YNILTSMRHNQVTLVTCEILVHYLFVYKLLPVLHLCIIVLVWKLTTQSIEMITGDFVIYIYIQL  
LLSFSCIYTEEVYITDHIELLVLFELLVLLYYWLSVSVMFYLMDRCHYEVLQLLLILLVLYLEGKI  
LLNSFEVVFLIMPLTDFLHYILYCLLYLLFCTLHFMILLVQAILLVFQVITIELHLLHIFYLKILLF  
LYLFLYVLLYSLCLMFIVIIILWLILCKLLLLLYLNDTYYSMLFDLYLINYVLRCLVFLLCYY  
LLQIVDLEVYNLDHLVKLSEFLLISFCNVLNTLKIHLYYVNVLYYTLVILLYYLLVTHIYLIYLI  
NLNYFIKLTKYIKIIYIFYLRYYSILGFQFIYIILCITLHLALANLLFPLVWNNDLLIHWFFESKK  
EIRNIFLLLLILFLKNIHFALPFSCIKMNDIKNKYLNYSYVILSYIATHIRSCINTCTCLISCSLCYSC  
KKNYGYAKKIRSCCRLWLTIASICCLKTFIKRICSSYTIYCSFLFRSCNNFNFCIIRLRCTLWSW  
FRDKRHEFRYILHVSCVIFSIRYSISWLKCEIRFSRFSKYSSINLINIKFSYINSNYDNRKFKFNCL  
YISKSYLIYTTFISCVYNIFHRIYSDKSSFFSRGPANLVWSGYMSQIARKPFYFKNKRQLAGNLIP  
NKYIIKLFIDTQFNIYIYLFYIMIKDIVNHRCESTKKKHMGTPLLGESELVSGFMTEHA AVVF  
VFFFLAEYGSIVLMCILTILFIGGYLLFEISYVFTVVNYIFFELFFIDVTFVEVQSLYTDFLNNSIIE  
GLLYGFNLGLKSSLMIFTFIARASFPRIREFDQLMGFCTVLLPINFAIIILVPCVLYSFNLLPVNIPLF  
LTHPPALLPQGYSTYEEGNRSRTILVNNTYTKTIYHTRECNYTLFLYSTLLAYYYLYMIIILLNL  
LGYINKKFVNFFHHFLIQNTNF

>YN540

ITILKNIKSYIKIIHLYSINLKGIFSILYLVLFFFSLQVFLLLGSLLNRWYARLLIKVISFYLLQYLV  
LEGFIILKKCSFIHILTINTKKLKIILLMVKLLIETIKYMLNLIQMLCLVLWQLFLLHFYYSCLIK  
NDVWVLYWYNLYLAINEYDIIYRVCICYSYFIFSHFYICSSSLRKIYFRVWFPFRAKNTIRYKI  
LYFCFSLFTFRFRNIINFPRSVCWYLSFSYFNFSYNRYIIRKRSNRQQTKIYTIERLPYR  
VCWNRGFVKLRQKTKKPTKGLMGSYKKMITYIYSYIFTITRIIYIYIILLYIKIIIRYNYSILLY  
KNIIYPIINFIFFLIIFFYIMLTHLQMKRTKYCCYSSGYRKIFLYYFLFGSFSVRGYMDGRRVFIL  
MNSGFKLTLFMNLNYNYNVGYDRIMYSLRVKRDTPYNTYWFRVEYIYLRVKNIYIYIINIVI  
YWYGLNQVYILSFDKHLFFYLLLLLYCEINNYNILHSTYLGILSYLAINDSNQILFSLVWNNDL  
LIHWFFDSKKRVNNFLDQKYYFLQKAYAFHFFDKQLLLIFGCLLVLTITKFFQFLYKFKEYKVIH

YNILTLSMRHNQVTLVTCEILVHYLFVYKLLPVLHLCIIVLVWKLTTQSIEMLITGDFVIYIVIQL  
LLSFSCIYTEEVYITDHIELLVLFELLVLLYYWLSVSVMFYLMDRCHYEVLQLLLILLVLYLEGKI  
LLNSFEVVFLIMPLTDFLHYILYCLLYLLFCTLHFMILLVQAILLVFQVITIELHLLHIFYLKILLF  
LYLFLYVLLYSLCLMFGIVIIILWLILCKLLLLLYLNDTYYSMLFDLYLINYVLRCLVLFLLCYY  
LLQIVDLEVYNLDHLVKLSEFLLLSFCNVLNTLKIHLYYVNVLYYTLVILLYYLLVTHIVLIYLI  
NLNYFIKLTKYIKIIYIFYLRYYSILGFQFIIYIILCITLHLALANLLFPLVWNNDDLIIHWWFESKK  
EIRNIFLLLLLILFLKNIHFALPFSCIKMNDIKNKYLNYSYVILSYIATHIRSCINTCTCLISCSLCYSC  
KKNYGYAKKIRSCCRLLWTIASICCLKTFIKRICSSYTIYCSFLFRSCNNFNFCIIRLRCYTLWSW  
FRDKRHEFRYILHVSCVIFSIRYSISWLKCEIRFSRFSKYSSINLINIKFSYINSNYDNRKFKFNCL  
YISKSYLIYTTFISCVYNIFHRIYSDKSSFFSRGPANLVWSGYMSQIARKPFYFKNKRQLAGNLIP  
NKYIIKLFIDTQFNIIYILFIYMIKDIVNHRCESTKKKHMGTPLGESELVSGFMTEHAAVVF  
VFFFLAEYGSIVLMCILTSILFIGGYLLFEISYVFTVVNYIFFELFFIDVTFVEVQSLYTDFLNNSIIE  
GLLYGFNLGLKSSLMIFTFIARASFPRIKFDQLMGFCTVLLPINFAIIILVPCVLYSFNLLPVNIPLF  
LTHPPALLPQGYSTYEEGNRSRTILVNNTYTKTIYHTRECNYTLFLYSTLLAYYYLYMIIILLNL  
LGYINKKFVNFFHHFLIQNTNN

>YN490

ITILKNIKSYIKIIHLYSINLKGIFSILYLVLFFFSLQVFLLLGSLLNRWYARLLIKVISFYLLQYLV  
LEGFIIILKKCSFIHLLTINTKKLKIILLMVKLLIETIKYMLNLIQMLCLVLWQLFLLHFFYYSCLIK  
NDVWVLYWYNLYLAINEYDIIYRVCICYSYFIFSHFYICSSSLSRKIYFRVWFPFRAKNTIRYKI  
LYFCFSLFTFRFRNIINFPRSVCWYLSFSYFNFSYNRYIIRKRSNRQQTKIYTIERLPYR  
VCWNRGFVKLRQKTKKPTKGLMGSYKKMITYIYSYIFTITRIIYIYIILLYIKIIIRYNYSILLY  
KNIIYPIINFIFFLIIFFYIMLTHLQMKRTKYCCYSSGYRKIFLYYFLFGSFSVRGYMDGRRVFIL  
MNSGFKLTLFMNLNYYINVGYDRIMYSLRVKRDPTTYNTYWFRVEYIYLRVKNIYIYIINIVI  
YWYGLNQVYILSFDKHLFFYLLLLLYCEINNYYNIIHSTYLGILSYLAINDSNQILFSLVWNNDL  
LIHWWFDSKKRVNNFLDQKYYFLQKAYAFHFFDKQLLLIFGCLLVLTITKFFQFLYKFKEYKVIH  
YNILTLSMRHNQVTLVTCEILVHYLFVYKLLPVLHLCIIVLVWKLTTQSIEMLITGDFVIYIVIQL  
LLSFSCIYTEEVYITDHIELLVLFELLVLLYYWLSVSVMFYLMDRCHYEVLQLLLILLVLYLEGKI  
LLNSFEVVFLIMPLTDFLHYILYCLLYLLFCTLHFMILLVQAILLVFQVITIELHLLHIFYLKILLF  
LYLFLYVLLYSLCLMFGIVIIILWLILCKLLLLLYLNDTYYSMLFDLYLINYVLRCLVLFLLCYY  
LLQIVDLEVYNLDHLVKLSEFLLLSFCNVLNTLKIHLYYVNVLYYTLVILLYYLLVTHIVLIYLI  
NLNYFIKLTKYIKIIYIFYLRYYSILGFQFIIYIILCITLHLALANLLFPLVWNNDDLIIHWWFESKK  
EIRNIFLLLLLILFLKNIHFALPFSCIKMNDIKNKYLNYSYVILSYIATHIRSCINTCTCLISCSLCYSC  
KKNYGYAKKIRSCCRLLWTIASICCLKTFIKRICSSYTIYCSFLFRSCNNFNFCIIRLRCYTLWSW  
FRDKRHEFRYILHVSCVIFSIRYSISWLKCEIRFSRFSKYSSINLINIKFSYINSNYDNRKFKFNCL  
YISKSYLIYTTFISCVYNIFHRIYSDKSSFFSRGPANLVWSGYMSQIARKPFYFKNKRQLAGNLIP  
NKYIIKLFIDTQFNIIYILFIYMIKDIVNHRCESTKKKHMGTPLGESELVSGFMTEHAAVVF  
VFFFLAEYGSIVLMCILTSILFIGGYLLFEISYVFTVVNYIFFELFFIDVTFVEVQSLYTDFLNNSIIE  
GLLYGFNLGLKSSLMIFTFIARASFPRIKFDQLMGFCTVLLPINFAIIILVPCVLYSFNLLPVNIPLF  
LTHPPALLPQGYSTYEEGNRSRTILVNNTYTKTIYHTRECNYTLFLYSTLLAYYYLYMIIILLNL  
LGYINKKFVNFFHHFLIQNTNF

>YN541

ITILKNIKSYIKIIHLYSINLKGIFSILYLVLFFFSLQVFLLLGSLLNRWYARLLIKVISFYLLQYLV  
LEGFIIILKKCSFIHLLTINTKKLKIILLMVKLLIETIKYMLNLIQMLCLVLWQLFLLHFFYYSCLIK  
NDVWVLYWYNLYLAINEYDIIYRVCICYSYFIFSHFYICSSSLSRKIYFRVWFPFRAKNTIRYKI

LYFCFSLFTFRFRNIINFPRSVWCWYLSFSYFNFYSYNNYRIYIIRKRSNRQQTKIYTIERLPYR  
VCWNRGFVKLRQKTKKPTKGLMGSYKKMITYIYSYYIFTITRIIYIYIILLYIKIIIRYNYSILLY  
KNIYPIINFIFLIIFFYIMLTHLQMKRTKYCCYSSGYRKIFLYYFLLLGSFSVRGYMDGRRVFIL  
MNSGFKLTLMNLYNYINVGYDRIMYSLRVKRDTPTYNTYWFRVEYIYLRVKNIYIQYIINIVI  
YWYGLNQVYILSFDKHLFFYLLLLLYCEINNYYNIILHSTYLGILSYLAINDSNQILFSLVWNNDL  
LIHWFFDSKKRVNNFLDQKYYFLQKAYAFHFFDKQLLLIFGCLLVLTITKFFQFLYKFKEYKVIH  
YNILTLSMRHNQVTLVTCEILVHYLFVYKLLPVLHLCIIVLVWKLTTQSIEMLITGDFVIYIVIQL  
LLSFSCIYTEEVYITDHIELLVLFELLVLLYYWLSVSVMFYLMDRCHYEVLQLLLILLVLYLEGKI  
LLNSFEVVFLIMPLTDFLHYILYCLLYLLFCTLHFMILLVQAILLVFQVITIELHLLHIFYLKILLF  
LYLFLYVLLYSLCLMFGIVIIILWLILCKLLLLLYLNDTYYSMLFDLYLINYVLRCLVLFLLCY  
LLQIVDLEVYNLDHLVKLSEFLLISFCNVLNTLKIHLYYVNVLYYTLVILLYYLLVTIIVLIYLI  
NLNYFIKLTKYIKIIYIFYLRYYSILGFQFIYIILCITLHLALANLLFPLVWNNDLLIHWFFESKK  
EIRNIFLLLLILFLKNIHFALPFSCIKMNDIKNKYLNYSYVILSYIATHIRSCINTCTCLISCSLCYSC  
KKNYGYAKKIRSCCRLLWTIASICCLKTFIKRICSSYTIYCSFLFRSCNNFNFCIIRLRCTLWSW  
FRDKRHEFRYILHVSCVIFSIRYSISWLKCEIRFSRFSKYSSINLINIKFSYINSNYDNRKFKFNCL  
YISKSYLIYTTFISCVYNIFHRIYSDKSSFFSRGPANLVWSGYMSQIARKPFYFKNKRQLAGNLIP  
NKYIILKFIDTQFNIYIYLFYIMIKDIVNHRCESTKKKHMGTPLGESELVSGFMTEHA AVVF  
VFFFLAEYGSIVLMCILTSILFIGGYLLFEISYVFTVVNYIFFELFFIDVTFVEVQSLYTDFLNNSIIE  
GLLYGFNLGLKSSLMIFTFIARASFPRIKFDQLMGFCTVLLPINFAIILVPCVLYSFNLLPVNIPLF  
LTHPPALLPQGYSTYEEGNRSRTILVNNYTYTKTIYHTRECNYTLFLYSTLLAYYYLYMIILLNL  
LGYINKKFVNFFHHFLIQNTNF

>YN544

ITILKNIKSYIKIIHLYSINLKGIFSILYLVLFFFSLQVFLLLGSLLNRWYARLLIKVISFYLLQYLV  
LEGFIILKKCSFIHLLTINTKKLKIILLMVKLLIETIKYMLNLIQMCLCLVWQLFLLHFYYSCLIK  
NDVWVLYWYNLYLAINEYDIIYRVCICYSYFIFSHFYICSSLSRKIYFRVWFPFFRAKNTIRYKI  
LYFCFSLFTFRFRNIINFPRSVWCWYLSFSYFNFYSYNNYRIYIIRKRSNRQQTKIYTIERLPYR  
VCWNRGFVKLRQKTKKPTKGLMGSYKKMITYIYSYYIFTITRIIYIYIILLYIKIIIRYNYSILLY  
KNIYPIINFIFLIIFFYIMLTHLQMKRTKYCCYSSGYRKIFLYYFLLLGSFSVRGYMDGRRVFIL  
MNSGFKLTLMNLYNYINVGYDRIMYSLRVKRDTPTYNTYWFRVEYIYLRVKNIYIQYIINIVI  
YWYGLNQVYILSFDKHLFFYLLLLLYCEINNYYNIILHSTYLGILSYLAINDSNQILFSLVWNNDL  
LIHWFFDSKKRVNNFLDQKYYFLQKAYAFHFFDKQLLLIFGCLLVLTITKFFQFLYKFKEYKVIH  
YNILTLSMRHNQVTLVTCEILVHYLFVYKLLPVLHLCIIVLVWKLTTQSIEMLITGDFVIYIVIQL  
LLSFSCIYTEEVYITDHIELLVLFELLVLLYYWLSVSVMFYLMDRCHYEVLQLLLILLVLYLEGKI  
LLNSFEVVFLIMPLTDFLHYILYCLLYLLFCTLHFMILLVQAILLVFQVITIELHLLHIFYLKILLF  
LYLFLYVLLYSLCLMFGIVIIILWLILCKLLLLLYLNDTYYSMLFDLYLINYVLRCLVLFLLCY  
LLQIVDLEVYNLDHLVKLSEFLLISFCNVLNTLKIHLYYVNVLYYTLVILLYYLLVTIIVLIYLI  
NLNYFIKLTKYIKIIYIFYLRYYSILGFQFIYIILCITLHLALANLLFPLVWNNDLLIHWFFESKK  
EIRNIFLLLLILFLKNIHFALPFSCIKMNDIKNKYLNYSYVILSYIATHIRSCINTCTCLISCSLCYSC  
KKNYGYAKKIRSCCRLLWTIASICCLKTFIKRICSSYTIYCSFLFRSCNNFNFCIIRLRCTLWSW  
FRDKRHEFRYILHVSCVIFSIRYSISWLKCEIRFSRFSKYSSINLINIKFSYINSNYDNRKFKFNCL  
YISKSYLIYTTFISCVYNIFHRIYSDKSSFFSRGPANLVWSGYMSQIARKPFYFKNKRQLAGNLIP  
NKYIILKFIDTQFNIYIYLFYIMIKDIVNHRCESTKKKHMGTPLGESELVSGFMTEHA AVVF  
VFFFLAEYGSIVLMCILTSILFIGGYLLFEISYVFTVVNYIFFELFFIDVTFVEVQSLYTDFLNNSIIE  
GLLYGFNLGLKSSLMIFTFIARASFPRIKFDQLMGFCTVLLPINFAIILVPCVLYSFNLLPVNIPLF

LTHPPALLPQGYSTYEEGNRSRTILVNNTYTKTIYHTRECNYTLFLYSTLLAYYYLYMIIILLNL  
LGYINKKFVNFFHHFLIQNTNF

>YN554

ITILKNIKSYIKIIHLYSINLKGIFSILYLVLFFFSLQVFLLLGSLLNRWYARLLIKVISFYLLQYLV  
LEGFIILKKCSFIHILTINTKKLKIILLMVKLLIETIKYMLNLIQMLCLVLWQLFLLHFYYSCLIK  
NDVWVLYWYNLYLAINEYDIIYRVCICYSYFIFSHFYICSSSLSRKIYFRVWFPFFRAKNTIRYKI  
LYFCFSLFTFRFRNIINFPRSVWCWYLSFSYFNFYSYNNYRIYIIRKRSNRQQTKIYTIERLPYR  
VCWNRGFKLRQKTKKPTKGLMGSYKKMITYIYSYIFTITRIIYIYIILLYIKIIIRYNYSILLY  
KNIIYPIINFIFFLIIFFYIMLTHLQMKRTKYCCYSSGYRKIFLYYFLLLGSFSVRGYMDGRRVFIL  
MNSGFKLTLFMNLNynyINVGyDRIMYSLRVKRDTPTYNTYWFRVEYIYLRVKNIYIQYIINIVI  
YWYGLNQVYILSFDKHLFFYLLLLLYCEINNynIILHSTYLGILSYLAINDSNQILFSLVWNNDL  
LIHWFFDSKKRVNNFLDQKYYFLQKAYAFHFFDKQLLLIFGCLLVLTITKFFQFLYKFKEYKVIH  
YNILTSMRHNQVTLVTCEILVHYLFVYKLLPVLHLCIIVLVWKLTTQSIEMITGDFVIYIVIQ  
LLSFSCIYTEEVYITDHIELLVLFELLVLLYYWLSVSVMFYLMDRCHYEVLQLLLILLVLYLEGKI  
LLNSFEVVFLIMPLTDFLHYILYCLLYLLFCTLHFMILLVQAILLVFQVITIELHLLHIFYLKILLF  
LYLFLYVLLYSLCLMFGIVIIILWLILCKLLLLLYLNDTYYSMLFDLYLINYVLRCLVFLLCYY  
LLQIVDLEVYNLDHLVKLSEFLLISFCNVLNTLKIHLYYVNVLYYTLVILLYYLLVTHIVLIYLI  
NLNYFIKLTKYIKIIYIFYLRYYSILGFQFIYIILCITLHLALANLLFPLVWNNDLLIHWFFDSKK  
EIRNIFLLLLILFLKNIHFALPFSCIKMNDIKNKYLNYSYVILSYIATHIRSCINTCTCLISCSLCYSC  
KKNYGYAKKIRSCRLWTIASICCLKTFIKRICSSYTIYCSFLFRSCNNFNFCIIRLRCYTLWSW  
FRDKRHEFRYILHVSCVIFSIRYSISWLKCEIRFSRFSKYSSINLINIKFSYINSNYDNRKFKFNCL  
YISKSYLIYTTFISCVYNIFHRIYSDKSSFFSRGPANLVWSGYMSQIARKPFYFKNKRQLAGNLIP  
NKYIIKLFDITQFNIYIYFIYMIKDIVNHRCESTKKKHMGTPLGESELVSGFMTEHAAVVF  
VFFFLAEYGSIVLMCILTILFIGGYLLFEISYVFTVVNYIFFELFFIDVTFVEVQSLYTDFLNNIIE  
GLLYGFNLGLKSSLMIFTFIARASFPRIKFDQLMGFCTVLLPINFAIILVPCVLYSFNLLPVNIPLF  
LTHPPALLPQGYSTYEEGNRSRTILVNNTYTKTIYHTRECNYTLFLYSTLLAYYYLYMIIILLNL  
LGYINKKFVNFFHHFLIQNTNF

>YN557

ITILKNIKSYIKIIHLYSINLKGIFSILYLVLFFFSLQVFLLLGSLLNRWYARLLIKVISFYLLQYLV  
LEGFIILKKCSFIHILTINTKKLKIILLMVKLLIETIKYMLNLIQMLCLVLWQLFLLHFYYSCLIK  
NDVWVLYWYNLYLAINEYDIIYRVCICYSYFIFSHFYICSSSLSRKIYFRVWFPFFRAKNTIRYKI  
LYFCFSLFTFRFRNIINFPRSVWCWYLSFSYFNFYSYNNYRIYIIRKRSNRQQTKIYTIERLPYR  
VCWNRGFKLRQKTKKPTKGLMGSYKKMITYIYSYIFTITRIIYIYIILLYIKIIIRYNYSILLY  
KNIIYPIINFIFFLIIFFYIMLTHLQMKRTKYCCYSSGYRKIFLYYFLLLGSFSVRGYMDGRRVFIL  
MNSGFKLTLFMNLNynyINVGyDRIMYSLRVKRDTPTYNTYWFRVEYIYLRVKNIYIQYIINIVI  
YWYGLNQVYILSFDKHLFFYLLLLLYCEINNynIILHSTYLGILSYLAINDSNQILFSLVWNNDL  
LIHWFFDSKKRVNNFLDQKYYFLQKAYAFHFFDKQLLLIFGCLLVLTITKFFQFLYKFKEYKVIH  
YNILTSMRHNQVTLVTCEILVHYLFVYKLLPVLHLCIIVLVWKLTTQSIEMITGDFVIYIVIQ  
LLSFSCIYTEEVYITDHIELLVLFELLVLLYYWLSVSVMFYLMDRCHYEVLQLLLILLVLYLEGKI  
LLNSFEVVFLIMPLTDFLHYILYCLLYLLFCTLHFMILLVQAILLVFQVITIELHLLHIFYLKILLF  
LYLFLYVLLYSLCLMFGIVIIILWLILCKLLLLLYLNDTYYSMLFDLYLINYVLRCLVFLLCYY  
LLQIVDLEVYNLDHLVKLSEFLLISFCNVLNTLKIHLYYVNVLYYTLVILLYYLLVTHIVLIYLI  
NLNYFIKLTKYIKIIYIFYLRYYSILGFQFIYIILCITLHLALANLLFPLVWNNDLLIHWFFESKK  
EIRNIFLLLLILFLKNIHFALPFSCIKMNDIKNKYLNYSYVILSYIATHIRSCINTCTCLISCSLCYSC

KKNYGYAKKIRSCCRLLWTIASICCLKTFIKRICSSYTIYCSFLFRSCNNFNFCIIRLRCTLWSW  
FRDKRHEFRYILHVSCVIFSIRYSISWLKCEIRFSRFSKYSSINLINIKFSYINSNYDNRKFKFNCL  
YISKSYLIYTTFISCVYNIFHRIYSDKSSFFSRGPANLVWSGYMSQIARKPFYFKNKRQLAGNLIP  
NKYIIKLFIDTQFNIYIYLFYMIKDIVNHRCESTKKKHMGTPLGESELVSGFMTEHAAVVF  
VFFFLAEYGSIVLMCILTILFIGGYLLFEISYVFTVVNYIFFELFFIDVTFVEVQSLYTDFLNNSIIE  
GLLYGFNLGLKSSLMIFTFIARASFPRIKFDQLMGFCTVLLPINFAIILVPCVLYSFNLLPVNIPLF  
LTHPPALLPQGYSTYEEGNRSRTILVNNYTYTKTIYHTRECNYTLFLYSTLLAYYYLYMIHLLNL  
LGYINKKFVNFFHHFLIQNTNF

>YN561

ITILKNIKSYIKIIHLYSINLKGIFSILYLVLFFFSLQVFLLLGSLNRWYARLLIKVISFYLLQYLV  
LEGFIILKKCSFIHLLTINTKKLKIILLMVKLLIETIKYMLNLIQMLCLVLWQLFLLHFFYYSCLIK  
NDVWVLYWYNLYLAINEYDIIYRVCICYSYFIFSHFYICSSSLSRKIYFRVWFPFRAKNTIRYKI  
LYFCFSLFTFRFRNIINFPRSVWCWYLSFSYFNFSYNNYRIYIIRKRSNRQQTKIYTIERLPYR  
VCWNRGFVKLRQKTKKPTKGLMGSYKKMITYIYSYYIFTITRIIYIYIILLYIKIIIRYNYSILLY  
KNIIYPIINFIFLLIIFFYIMLTHLQMKRTKYCCYSSGYRKIFLYYFLFGSFSVRGYMDGRRVFIL  
MNSGFKLTLFMNLNYYINVGYDRIMYSLRVKRDPTTYNTYWFRVEYIYLRVKNIYIYIINIVI  
YWYGLNQVYILSFDKHLFFYLLLLLYCEINNYYNIIHSTYLGILSYLAINDSNQILFSLVWNNDL  
LIHWFFDSKKRVNNFLDQKYYFLQKAYAFHFFDKQLLLIFGCLLVLTITKFFQFLYKFKEYKVIH  
YNILTLSMRHNQVTLVTCEILVHYLFVYKLLPVLHLCIIVLVWKLTTQSIEMLITGDFVIYIVIQ  
LLSFSCIYTEEVYITDHIELLVLFELLVLLYYWLSVSVMFYLMDRCHYEVLQLLLILLVLYLEGKI  
LLNSFEVVFLIMPLTDFLHYILYCLLYLLFCTLHFMILLVQAILLVFQVITIELHLLHIFYLKILLF  
LYLFLYVLLYSLCLMFGIVIIILWLILCKLLLLLYLNDTYYSMLFDLYLINYVLRCLVLFLLCYY  
LLQIVDLEVYNLDHLVKLSEFLLISFCNVLNTLKIHLIYVNVLYYTLVILLLYYLLVTIIVLIYLI  
NLNYFIKLTKYIKIIYIFYLRYYSILGFQFIYIILCITLHLALANLLFPLVWNNDDLIIHWFFESKK  
EIRNIFLLLLLILFLKNIHFALPFSCIKMNDIKNKYLNYSYVILSYIATHIRSCINTCTCLISCSLCYSC  
KKNYGYAKKIRSCCRLLWTIASICCLKTFIKRICSSYTIYCSFLFRSCNNFNFCIIRLRCTLWSW  
FRDKRHEFRYILHVSCVIFSIRYSISWLKCEIRFSRFSKYSSINLINIKFSYINSNYDNRKFKFNCL  
YISKSYLIYTTFISCVYNIFHRIYSDKSSFFSRGPANLVWSGYMSQIARKPFYFKNKRQLAGNLIP  
NKYIIKLFIDTQFNIYIYLFYMIKDIVNHRCESTKKKHMGTPLGESELVSGFMTEHAAVVF  
VFFFLAEYGSIVLMCILTILFIGGYLLFEISYVFTVVNYIFFELFFIDVTFVEVQSLYTDFLNNSIIE  
GLLYGFNLGLKSSLMIFTFIARASFPRIKFDQLMGFCTVLLPINFAIILVPCVLYSFNLLPVNIPLF  
LTHPPALLPQGYSTYEEGNRSRTILVNNYTYTKTIYHTRECNYTLFLYSTLLAYYYLYMIHLLNL  
LGYINKKFVNFFHHFLIQNTNY

>YN567

ITILKNIKSYIKIIHLYSINLKGIFSILYLVLFFFSLQVFLLLGSLNRWYARLLIKVISFYLLQYLV  
LEGFIILKKCSFIHLLTINTKKLKIILLMVKLLIETIKYMLNLIQMLCLVLWQLFLLHFFYYSCLIK  
NDVWVLYWYNLYLAINEYDIIYRVCICYSYFIFSHFYICSSSLSRKIYFRVWFPFRAKNTIRYKI  
LYFCFSLFTFRFRNIINFPRSVWCWYLSFSYFNFSYNNYRIYIIRKRSNRQQTKIYTIERLPYR  
VCWNRGFVKLRQKTKKPTKGLMGSYKKMITYIYSYYIFTITRIIYIYIILLYIKIIIRYNYSILLY  
KNIIYPIINFIFLLIIFFYIMLTHLQMKRTKYCCYSSGYRKIFLYYFLFGSFSVRGYMDGRRVFIL  
MNSGFKLTLFMNLNYYINVGYDRIMYSLRVKRDPTTYNTYWFRVEYIYLRVKNIYIYIINIVI  
YWYGLNQVYILSFDKHLFFYLLLLLYCEINNYYNIIHSTYLGILSYLAINDSNQILFSLVWNNDL  
LIHWFFDSKKRVNNFLDQKYYFLQKAYAFHFFDKQLLLIFGCLLVLTITKFFQFLYKFKEYKVIH  
YNILTLSMRHNQVTLVTCEILVHYLFVYKLLPVLHLCIIVLVWKLTTQSIEMLITGDFVIYIVIQ

LLSFSCIYTEEVYITDHIELLVLFELLVLLYYWLSVSVMFYLMDRCHYEVLQLLLILLVLYLEGKI  
LLNSFEVVFLIMPLTDFLHYILYCLLYLLFCTLHFMILLVQAILLVFQVITIELHLLHIFYLKILLF  
LYLFLYVLLYSLCMLFGIVIIHLWLILCKLLLLLYLNDTYYSMLFDLYLINYVLRCLVLFLLCYY  
LLQIVDLEVYNLDHLVKLSEFLLISFCNVLNTLKIHLYYVNVLYYTLVILLYYLLVTHIYLIYLI  
NLNYFIKLTKEYIKIIYIFYLRYYFSILGFQFIIYIILCITLHLALANLLFPLVWNNDDLHWWFESKK  
EIRNIFLLLLILFLKNIHFALPFSCIKMNDIKNKYLNYSYVILSYIATHIRSCINTCTCLISCSLCYSC  
KKNYGYAKKIRSCCRLLWTIASICCLKTFIKRICSSYTIYCSFLFRSCNNFNFCIIRLRCTLWSW  
FRDKRHEFRYILHVSCVIFSIRYSISWLKCEIRFSRFSKYSSINLINIKFSYINSNYDNRKFKFNCL  
YISKSYLIYTTFISCVYNIFHRIYSDKSSFFSRGPANLVWSGYMSQIARKPFYFKNKRQLAGNLIP  
NKYIIKLFIDTQFNIYIYLFYIMIKDIVNHRCESTKKKHMGTPLLLGESELVSGFMTEHAAVVF  
VFFFLAEYGSIVLMCILTSLFIGGYLLFEISYVFTVVNYIFFELFFIDVTFVEVQSLYTDFLNNSIIE  
GLLYGFNLGLKSSLMIFTFIARASFPRIKFDQLMGFCTVLLPINFAIIILVPCVLYSFNLLPVNIPLF  
LTHPPALLPQGYSTYEEGNRSRTILVNNYTYTKTIYHTRECNYTLFLYSTLLAYYYLYMIIILLNL  
LGYINKKFVNFFHHFLIQNTNF

>YN604

ITILKNIKSYIKIIHLYSINLKGIFSILYLVLFFFSLQVFLLLGSLLNRWYARLLIKVISFYLLQYLV  
LEGFIILKKCSFIHLLTINTKKLKIILLMVKLLIETIKYMLNLIQMLCLVLWQLFLLHFFYYSCLIK  
NDVWVLYWYNLYLAINEYDIIYRVCICYSYFIFSHFYICSSSLSRKIYFRVWFPFFRAKNTIRYKI  
LYFCFSLFTFRFRNIINFPRSVWCWYLSFSYFNFYSYNNYRIYIIRKRSNRQQTKIITYTIERLPYR  
VCWNRGFKLRQKTKKPTKGLMGSYKKMITYIYSYIFTITRIIYIYIILLYIKIIIIIRYNYSILLY  
KNIYPIINFIFFLIIFFYIMLTHLQMKRTKYCCYSSGYRKIFLYYLFLLGSFSVRGYMDGRRVFIL  
MNSGFKLTLMNLYNNYINVGYDRIMYSLRVKRDTPTYNTYWFRVEYIYLRVKNIYIYIINIVI  
YWYGLNQVYILSFDKHLFFYLLLLLYCEINNYNIILHSTYLGILSYLAINDSNQILFSLVWNNDL  
LIHWWFDSKKRVNNFLDQKYYFLQKAYAFHFFDKQLLLIFGCLLVLTITKFFQFLYKFKEYKVIH  
YNILTLSMRHNQVTLVTCEILVHYLFVYKLLPVLHLCIIVLVWKLTTQSIEMITGDFVIYIYIQL  
LLSFSCIYTEEVYITDHIELLVLFELLVLLYYWLSVSVMFYLMDRCHYEVLQLLLILLVLYLEGKI  
LLNSFEVVFLIMPLTDFLHYILYCLLYLLFCTLHFMILLVQAILLVFQVITIELHLLHIFYLKILLF  
LYLFLYVLLYSLCMLFGIVIIHLWLILCKLLLLLYLNDTYYSMLFDLYLINYVLRCLVLFLLCYY  
LLQIVDLEVYNLDHLVKLSEFLLISFCNVLNTLKIHLYYVNVLYYTLVILLYYLLVTHIYLIYLI  
NLNYFIKLTKEYIKIIYIFYLRYYFSILGFQFIIYIILCITLHLALANLLFPLVWNNDDLHWWFESKK  
EIRNIFLLLLILFLKNIHFALPFSCIKMNDIKNKYLNYSYVILSYIATHIRSCINTCTCLISCSLCYSC  
KKNYGYAKKIRSCCRLLWTIASICCLKTFIKRICSSYTIYCSFLFRSCNNFNFCIIRLRCTLWSW  
FRDKRHEFRYILHVSCVIFSIRYSISWLKCEIRFSRFSKYSSINLINIKFSYINSNYDNRKFKFNCL  
YISKSYLIYTTFISCVYNIFHRIYSDKSSFFSRGPANLVWSGYMSQIARKPFYFKNKRQLAGNLIP  
NKYIIKLFIDTQFNIYIYLFYIMIKDIVNHRCESTKKKHMGTPLLLGESELVSGFMTEHAAVVF  
VFFFLAEYGSIVLMCILTSLFIGGYLLFEISYVFTVVNYIFFELFFIDVTFVEVQSLYTDFLNNSIIE  
GLLYGFNLGLKSSLMIFTFIARASFPRIKFDQLMGFCTVLLPINFAIIILVPCVLYSFNLLPVNIPLF  
LTHPPALLPQGYSTYEEGNRSRTILVNNYTYTKTIYHTRECNYTLFLYSTLLAYYYLYMIIILLNL  
LGYINKKFVNFFHHFLIQNTNF

>YN608

ITILKNIKSYIKIIHLYSINLKGIFSILYLVLFFFSLQVFLLLGSLLNRWYARLLIKVISFYLLQYLV  
LEGFIILKKCSFIHLLTINTKKLKIILLMVKLLIETIKYMLNLIQMLCLVLWQLFLLHFFYYSCLIK  
NDVWVLYWYNLYLAINEYDIIYRVCICYSYFIFSHFYICSSSLSRKIYFRVWFPFFRAKNTIRYKI  
LYFCFSLFTFRFRNIINFPRSVWCWYLSFSYFNFYSYNNYRIYIIRKRSNRQQTKIITYTIERLPYR

VCWNRGFVKLRQKTKKPTKGLMGSYKKMITYIYSYYIFTITRIIYIYIILLYIKIIIRYNYSILLY  
KNIIYPIINFIFFLIIFFYIMLTHLQMKRTKYCCYSSGYRKIFLYYLFLLGSFSVRGYMDGRRVFIL  
MNSGFKLTLFMNLNynyINvgYDRIMYSLRVKRDTPtyNTYWFRVEYIYLRVKNIYIQYIINIVI  
YWYGLNQVYILSFDKHLFFYLLLLLYCEINNynIILHSTYLgILSYLAINDSNQILFSLVWNNDL  
LIHWFFDSKKRVNNFLDQKYYFLQKAYAFHFFDKQLLLIFGCLLVLTITKFFQFLYKFKEYKVIH  
YNILTLSMRHNQVTLVTCEILVHYLFVYKLLPVLHLCIIVLVWKLTTQSIEMLitGDFVIYIVIQL  
LLSFSCIYTEEVYITDHIELLVLFELLVLLYYWLSVSVMFYLMDRCHYEVLQLLLILLVLYLEGKI  
LLNSFEVVFLIMPLTDFLHYILYCLLYLLFCTLHFMILLVQAILLVFQVITIELHLLHIFYLKILLF  
LYLFLYVLLYSLCLMFGIVIIILWLILCKLLLLLYLNDTYYSMLFDLYLINYVLRCLVLFLLCYY  
LLQIVDLEVYNLDHLVKLSEFLLISFCNVLNTLKIHLYYVNVLYYTLVILLYYLLVTIIVLIYLI  
NLNYFIKLTKYIKIIYIFYLRYYSILGFQFIYIILCITLHLALANLLFPLVWNNDLLIHWFFESKK  
EIRNIFLLLLILFLKNIHFALPFSCIKMNDIKNKYLNYSYVILSYIATHIRSCINTCTCLISCSLCYSC  
KKNYGYAKKIRSCRLWTIASICCLKTFIKRICSSYTIYCSFLFRSCNNFNFCIIRLRCYTLWSW  
FRDKRHEFRYILHVSCVIFSIRYSISWLKCEIRFSRFSKYSSINLINIKFSYINSNYDNRKFKFNCL  
YISKSYLIYTTFISCVYNIFHRIYSDKSSFFSRGPANLVWSGYMSQIARKPFYFKNKRQLAGNLIP  
NKYIIKLFIDTQFNIYIYLFYIMIKDIVNHRCESTKKKHMGTPLGESELVSGFMTEHAAVVF  
VFFFLAEYGSIVLMCILTSILFIGGYLLFEISYVFTVVNYIFFELFFIDVTFVEVQSLYTDFLNNSIIE  
GLLYGFNLGLKSSLMIFTFIARASFPRIKFDQLMGFCTVLLPINFAIIILVPCVLYSFNLLPVNIPLF  
LTHPPALLPQGYSTYEEGNRSRTILVNNTYTKTIYHTRECNYTLFLYSTLLAYYYLYMIIILLNL  
LGYINKKFVNFFHHFLIQNTNF

>YN617

ITILKNIKSYIKIIHLYSINLKGIFSILYLVLFFFSLQVFLLLGSLLNRWYARLLIKVISFYLLQYLV  
LEGFIILKKCSFIHLTINTKKLKIILLMVKLLIETIKYMLNLIQMLCLVLWQLFLLHFYYSCLIK  
NDVWVLYWYNLYLAINEYDIIYRVCICYSYFIFSHFYICSSSLSRKIYFRVWFPFRAKNTIRYKI  
LYFCFSLFTFRFRNIINFPRSVCWYLSFSYFNFSYNNYRIYIIRKRSNRQQTKIIYTIERLPYR  
VCWNRGFVKLRQKTKKPTKGLMGSYKKMITYIYSYYIFTITRIIYIYIILLYIKIIIRYNYSILLY  
KNIIYPIINFIFFLIIFFYIMLTHLQMKRTKYCCYSSGYRKIFLYYLFLLGSFSVRGYMDGRRVFIL  
MNSGFKLTLFMNLNynyINvgYDRIMYSLRVKRDTPtyNTYWFRVEYIYLRVKNIYIQYIINIVI  
YWYGLNQVYILSFDKHLFFYLLLLLYCEINNynIILHSTYLgILSYLAINDSNQILFSLVWNNDL  
LIHWFFDSKKRVNNFLDQKYYFLQKAYAFHFFDKQLLLIFGCLLVLTITKFFQFLYKFKEYKVIH  
YNILTLSMRHNQVTLVTCEILVHYLFVYKLLPVLHLCIIVLVWKLTTQSIEMLitGDFVIYIVIQL  
LLSFSCIYTEEVYITDHIELLVLFELLVLLYYWLSVSVMFYLMDRCHYEVLQLLLILLVLYLEGKI  
LLNSFEVVFLIMPLTDFLHYILYCLLYLLFCTLHFMILLVQAILLVFQVITIELHLLHIFYLKILLF  
LYLFLYVLLYSLCLMFGIVIIILWLILCKLLLLLYLNDTYYSMLFDLYLINYVLRCLVLFLLCYY  
LLQIVDLEVYNLDHLVKLSEFLLISFCNVLNTLKIHLYYVNVLYYTLVILLYYLLVTIIVLIYLI  
NLNYFIKLTKYIKIIYIFYLRYYSILGFQFIYIILCITLHLALANLLFPLVWNNDLLIHWFFESKK  
EIRNIFLLLLILFLKNIHFALPFSCIKMNDIKNKYLNYSYVILSYIATHIRSCINTCTCLISCSLCYSC  
KKNYGYAKKIRSCRLWTIASICCLKTFIKRICSSYTIYCSFLFRSCNNFNFCIIRLRCYTLWSW  
FRDKRHEFRYILHVSCVIFSIRYSISWLKCEIRFSRFSKYSSINLINIKFSYINSNYDNRKFKFNCL  
YISKSYLIYTTFISCVYNIFHRIYSDKSSFFSRGPANLVWSGYMSQIARKPFYFKNKRQLAGNLIP  
NKYIIKLFIDTQFNIYIYLFYIMIKDIVNHRCESTKKKHMGTPLGESELVSGFMTEHAAVVF  
VFFFLAEYGSIVLMCILTSILFIGGYLLFEISYVFTVVNYIFFELFFIDVTFVEVQSLYTDFLNNSIIE  
GLLYGFNLGLKSSLMIFTFIARASFPRIKFDQLMGFCTVLLPINFAIIILVPCVLYSFNLLPVNIPLF  
LTHPPALLPQGYSTYEEGNRSRTILVNNTYTKTIYHTRECNYTLFLYSTLLAYYYLYMIIILLNL

LGYNKKFVNFFHHFLIQNTN

>YN626

ITILKNIKSYIKIIHLYSINLKGIFSILYLVLFFFSLQVFLLLGSLLNRWYARLLIKVISFYLLQYLV  
LEGFIILKKCSFIHLLTINTKKLKIILLMVKLLIETIKYMLNLIQMLCLVLWQLFLLHFYYSCLIK  
NDVWVLYWYNLYLAINEYDIIYRVCICYSYFIFSHFYICSSSLSRKIYFRVWFPFFRAKNTIRYKI  
LYFCFSLFTFRFRNIINFPRSVWCWYLSFSYFNFYSYNNYRIYIIRKRSNRQQTKIIYTIERLPYR  
VCWNRGFVKLRQKTKKPTKGLMGSYKKMITYIYSYIFTITRIIYIYIILLYIKIIIRYNYSILLY  
KNIIYPIINFIFLLIIFFYIMLTHLQMKRTKYCCYSSGYRKIFLYYLFLLGSFSVRGYMDGRRVFIL  
MNSGFKLTLMNLYNNYINVGYDRIMYSLRVKRDTPYNTYWFRVEYIYLRVKNIYIYIINIVI  
YWYGLNQVYILSFDKHLFFYLLLLLYCEINNYYNIIHSTYLGILSYLAINDSNQILFSLVWNNDL  
LIHWFFDSKKRVNNFLDQKYYFLQKAYAFHFFDKQLLLIFGCLLVLTITKFFQFLYKFKEYKVIH  
YNILTLSMRHNQVTLVTCEILVHYLFVYKLLPVLHLCIIVLVWKLTTQSIEMITGDFVIYIYIQL  
LLSFSCIYTEEVYITDHIELLVLFELLVLLYYWLSVSVMFYLMDRCHYEVLQLLLILLVLYLEGKI  
LLNSFEVVFLIMPLTDFLHYILYCLLYLLFCTLHFMILLVQAILLVFQVITIELHLLHIFYLKILLF  
LYLFLYVLLYSLCLMFGIVIIILWLILCKLLLLLYLNDTYYSMLFDLYLINYVLRCLVLFLLCYY  
LLQIVDLEVYNLDHLVKLSEFLLISFCNVLNTLKIHLYYVNVLYYTLVILLYYLLVTIIVLIYLI  
NLNYFIKLTKYIKIIYIFYLRYYSILGFQFIYIILCITLHLALANLLFPLVWNNDLLIHWFFESKK  
EIRNIFLLLLILFLKNIHFALPFSCIKMNDIKNKYLNYSYVILSYIATHIRSCINTCTCLISCSLCYSC  
KKNYGYAKKIRSCCRLLWTIASICCLKTFIKRICSSYTIYCSFLFRSCNNFNFCIIRLRCTLWSW  
FRDKRHEFRYILHVSCVIFSIRYSISWLKCEIRFSRFSKYSSINLINIKFSYINSNYDNRFKFNCL  
YISKSYLIYTTFISCVYNIFHRIYSDKSSFFSRGPANLVWSGYMSQIARKPFYFKNKRQLAGNLIP  
NKYIIKLFIDTQFNIYIYLFYMIKDIVNHRCESTKKKHMGTPLGESELVSGFMTEHAAVVF  
VFFFLAEYGSIVLMCILTILFIGGYLLFEISYVFTVNYIFFELFFIDVTFVEVQSLYTDFLNNIIIE  
GLLYGFNLGLKSSLMIFTFIARASFPRIREFDQLMGFCTVLLPINFAIILVPCVLYSFNLLPVNIPLF  
LTHPPALLPQGYSTYEEGNRSRTILVNNYTYTKTIYHTRECNYTLFLYSTLLAYYYLYMIIILLNL  
LGYNKKFVNFFHHFLIQNTNF

>YN634

ITILKNIKSYIKIIHLYSINLKGIFSILYLVLFFFSLQVFLLLGSLLNRWYARLLIKVISFYLLQYLV  
LEGFIILKKCSFIHLLTINTKKLKIILLMVKLLIETIKYMLNLIQMLCLVLWQLFLLHFYYSCLIK  
NDVWVLYWYNLYLAINEYDIIYRVCICYSYFIFSHFYICSSSLSRKIYFRVWFPFFRAKNTIRYKI  
LYFCFSLFTFRFRNIINFPRSVWCWYLSFSYFNFYSYNNYRIYIIRKRSNRQQTKIIYTIERLPYR  
VCWNRGFVKLRQKTKKPTKGLMGSYKKMITYIYSYIFTITRIIYIYIILLYIKIIIRYNYSILLY  
KNIIYPIINFIFLLIIFFYIMLTHLQMKRTKYCCYSSGYRKIFLYYLFLLGSFSVRGYMDGRRVFIL  
MNSGFKLTLMNLYNNYINVGYDRIMYSLRVKRDTPYNTYWFRVEYIYLRVKNIYIYIINIVI  
YWYGLNQVYILSFDKHLFFYLLLLLYCEINNYYNIIHSTYLGILSYLAINDSNQILFSLVWNNDL  
LIHWFFDSKKRVNNFLDQKYYFLQKAYAFHFFDKQLLLIFGCLLVLTITKFFQFLYKFKEYKVIH  
YNILTLSMRHNQVTLVTCEILVHYLFVYKLLPVLHLCIIVLVWKLTTQSIEMITGDFVIYIYIQL  
LLSFSCIYTEEVYITDHIELLVLFELLVLLYYWLSVSVMFYLMDRCHYEVLQLLLILLVLYLEGKI  
LLNSFEVVFLIMPLTDFLHYILYCLLYLLFCTLHFMILLVQAILLVFQVITIELHLLHIFYLKILLF  
LYLFLYVLLYSLCLMFGIVIIILWLILCKLLLLLYLNDTYYSMLFDLYLINYVLRCLVLFLLCYY  
LLQIVDLEVYNLDHLVKLSEFLLISFCNVLNTLKIHLYYVNVLYYTLVILLYYLLVTIIVLIYLI  
NLNYFIKLTKYIKIIYIFYLRYYSILGFQFIYIILCITLHLALANLLFPLVWNNDLLIHWFFESKK  
EIRNIFLLLLILFLKNIHFALPFSCIKMNDIKNKYLNYSYVILSYIATHIRSCINTCTCLISCSLCYSC  
KKNYGYAKKIRSCCRLLWTIASICCLKTFIKRICSSYTIYCSFLFRSCNNFNFCIIRLRCTLWSW

FRDKRHEFRYLHVSCVIFSIRYSISWLKCEIRFSRFSKYSSINLINIKFSYINSNYDNRKFKFNCL  
YISKSYLIYTTFISCVYNIFHRIYSDKSSFFSRGPANLVWSGYMSQIARKPFYFKNKRQLAGNLIP  
NKYIIKLFIDTQFNIYIYLFYIMIKDIVNHRCESTKKKHMGTHLPLLGESELVSGFMTEHAAVVF  
VFFFLAEYGSIVLMCILTILFIGGYLLFEISYVFTVVNYIFFELFFIDVTFVEVQSLYTDFLNNSIIE  
GLLYGFNLGLKSSLMIFTFIARASFPRIKFDQLMGFCTVLLPINFAIIILVPCVLYSFNLLPVNIPLF  
LTHPPALLPQGYSTYEEGNRSRTILVNNTYTKTIYHTRECNYTLFLYSTLLAYYYLYMIIILLNL  
LGYINKKFVNFFHHFLIQNTNF

>YN635

ITILKNIKSYIKIIHLYSINLKGIFSILYLVLFFFSLQVFLLLGSLLNRWYARLLIKVISFYLLQYLV  
LEGFIILKKCSFIHLTINTKKLKIILLMVKLLIETIKYMLNLIQMLCLVLWQLFLLHFYYSCLIK  
NDVWVLYWYNLYLAINEYDIIYRVCICYSYFIFSHFYICSSSLSRKIYFRVWFPFFRAKNTIRYKI  
LYFCFSLFTFRFRNIINFPRSVCWYLSFSYFNFYSYNNYRIYIIRKRSNRQQTKIYTIERLPYR  
VCWNRGFVKLRQKTKKPTKGLMGSYKKMITYIYSYIFTITRIIYIYIILLYIKIIIRYNYSILLY  
KNIIYPIINFIFLIIFFYIMLTHLQMKRTKYCCYSSGYRKIFLYYFLLGFSFSVRGYMDGRRVFIL  
MNSGFKLTLFMNLNNTYINVGYDRIMYSLRVKRDTPYNTYWFRVEYIYLRVKNIYIYIINIVI  
YWYGLNQVYILSFDKHLFFYLLLLLYCEINNYYNIIHSTYLGILSYLAINDSNQILFSLVWNNDL  
LIHWFFDSKKRVNNFLDQKYYFLQKAYAFHFFDKQLLLIFGCLLVLTITKFFQFLYKFKEYKVIH  
YNILTSMRHNQVTLVTCEILVHYLFVYKLLPVLHLCIIVLVWKLTTQSIEMITGDFVIYIYIQL  
LLSFSCIYTEEVYITDHIELLVLFELLVLLYYWLSVSVMFYLMDRCHYEVLQLLLILLVLYLEGKI  
LLNSFEVVFLIMPLTDFLHYILYCLLYLLFCTLHFMILLVQAILLVFQVITIELHLLHIFYLKILLF  
LYLFLYVLLYSLCMLFGIVIIILWLILCKLLLLLYLNDTYYSMLFDLYLINYVLRCLVFLLCYY  
LLQIVDLEVYNLDHLVKLSEFLLISFCNVLNTLKIHLYYVNVLYYTLVILLYYLLVTHIVLIYLI  
NLNYFIKLTKYIKIIYIFYLRYYSILGFQFIYIILCITLHLALANLLFPLVWNNDLLIHWFFESKK  
EIRNIFLLLLILFLKNIHFALPFSCIKMNDIKNKYLNYSYVILSYIATHIRSCINTCTCLISCSLCYSC  
KKNYGYAKKIRSCCRLLWTIASICCLKTFIKRICSSYTIYCSFLFRSCNNFNFCIIRLRCYTLWSW  
FRDKRHEFRYLHVSCVIFSIRYSISWLKCEIRFSRFSKYSSINLINIKFSYINSNYDNRKFKFNCL  
YISKSYLIYTTFISCVYNIFHRIYSDKSSFFSRGPANLVWSGYMSQIARKPFYFKNKRQLAGNLIP  
NKYIIKLFIDTQFNIYIYLFYIMIKDIVNHRCESTKKKHMGTHLPLLGESELVSGFMTEHAAVVF  
VFFFLAEYGSIVLMCILTILFIGGYLLFEISYVFTVVNYIFFELFFIDVTFVEVQSLYTDFLNNSIIE  
GLLYGFNLGLKSSLMIFTFIARASFPRIKFDQLMGFCTVLLPINFAIIILVPCVLYSFNLLPVNIPLF  
LTHPPALLPQGYSTYEEGNRSRTILVNNTYTKTIYHTRECNYTLFLYSTLLAYYYLYMIIILLNL  
LGYINKKFVNFFHHFLIQNTNF

>YN640

ITILKNIKSYIKIIHLYSINLKGIFSILYLVLFFFSLQVFLLLGSLLNRWYARLLIKVISFYLLQYLV  
LEGFIILKKCSFIHLTINTKKLKIILLMVKLLIETIKYMLNLIQMLCLVLWQLFLLHFYYSCLIK  
NDVWVLYWYNLYLAINEYDIIYRVCICYSYFIFSHFYICSSSLSRKIYFRVWFPFFRAKNTIRYKI  
LYFCFSLFTFRFRNIINFPRSVCWYLSFSYFNFYSYNNYRIYIIRKRSNRQQTKIYTIERLPYR  
VCWNRGFVKLRQKTKKPTKGLMGSYKKMITYIYSYIFTITRIIYIYIILLYIKIIIRYNYSILLY  
KNIIYPIINFIFLIIFFYIMLTHLQMKRTKYCCYSSGYRKIFLYYFLLGFSFSVRGYMDGRRVFIL  
MNSGFKLTLFMNLNNTYINVGYDRIMYSLRVKRDTPYNTYWFRVEYIYLRVKNIYIYIINIVI  
YWYGLNQVYILSFDKHLFFYLLLLLYCEINNYYNIIHSTYLGILSYLAINDSNQILFSLVWNNDL  
LIHWFFDSKKRVNNFLDQKYYFLQKAYAFHFFDKQLLLIFGCLLVLTITKFFQFLYKFKEYKVIH  
YNILTSMRHNQVTLVTCEILVHYLFVYKLLPVLHLCIIVLVWKLTTQSIEMITGDFVIYIYIQL  
LLSFSCIYTEEVYITDHIELLVLFELLVLLYYWLSVSVMFYLMDRCHYEVLQLLLILLVLYLEGKI

LLNSFEVVFLIMPLTDFLHYILYCLLYLLFCTLHFMILLVQAILLVFQVITIELHLLHIFYLKILLF  
LYLFLYVLLYSLCLMFGIVIIILWLILCKLLLLLYLNDTYYL SMLFDLYLINYVLRCLVLFLLCYY  
LLQIVDLEVYNLDHLVKLSEFLLISFCNVLNTLKIHLYYVNVLYYTLVILLLYYLLVTIIVLIYLI  
NLNYFIKLT KYIKIIYIFYLRYYSILGFQFIIYIILCITLHLALANLLFPLVWNNDDLIIHWWFESKK  
EIRNIFLLLLILFLKNIHFALPFSCIKMNDIKNKYLNYSYVILSYIATHIRSCINTCTCLISCSLCYSC  
KKNYGYAKKIRSCRLWTIASICCLKTFIKRICSSYTIYCSFLFRSCNNFNFCIIRLRCYTLWSW  
FRDKRHEFRYILHVSCVIFSIRYSISWLKCEIRFSRFSKYSSINLINIKFSYINSNYDNRKFKFNCL  
YISKSYLIYTTFISCVYNIFHRIYSDKSSFFSRGPANLVWSGYMSQIARKPFYFKNKRQLAGNLIP  
NKYIIKLFIDTQFNIYIYLFYIMIKDIVNHRCESTKKKHMGTPLLGESELVSGFMTEHA AVVF  
VFFFLAEYGSIVLMCILT SILFIGGYLLFEISYVFTVVNYIFFELFFIDVTFVEVQSLYTDFLNNSIIE  
GLLYGFNLGLKSSLMIFTFIARASFPRIRFDQLMGFCTVLLPINFAIIILVPCVLYSFNLLPVNIPLF  
LTHPPALLPQGYSTYEEGNRSRTILVNNYTYTKTIYHTRECNYTLFLYSTLLAYYYLYMIHLLNL  
LGYINKKFVNFFHHFLIQNTNF

>YN643

ITILKNIKSYIKIIHLYSINLKGIFSILYLVL LLSLQVFLLLGSLNRWYARLLIKVISFYLLQYLV  
LEGFIILKKCSFIHLTINTKKLKIILLMVKLLIETIKYMLNLIQMLCLVLWQLFLLHFFYYSCLIK  
NDVWVLYWYNLYLAINEYDIIYRVCICYSYFIFSHFYICSSSLSRKIYFRVWFPFRAKNTIRYKI  
LYFCFSLFTFRFRNIINFPRSV CWYLWSFSYFNFSYNNYRIYIIRKRSNRQQTKIIYTIERLPYR  
VCWNRGFVKLRQKTKKPTKGLMGSYKKMITYIYSYIYFTITRIIYIYIILLYIKIIIRYNYSILLY  
KNIYPIINFIFFLIIFFYIMLTHLQMKRTKYCCYSSGYRKIFLYYFLLG SFSVRGYMDGRRVFIL  
MNSGFKLTLFMNLNYNYNVGYDRIMYSLRVKRDTPYNTYWFRVEYIYLRVKNIYQYIINIVI  
YWYGLNQVYILSFDKHLFFYLLLLLYCEINNYNIIHSTYLGILSYLAINDSNQILFSLVWNNDL  
LIHWWFDSKKRVNFDQKYYFLQKAYAFHFFDKQLLLIFGCLLVLTITKFFQFLYKFKEYKVIH  
YNILTL SMRHNVTLVTCEILVHYLFVYKLLPVLHLCHIVLVWKL LTQSIEMLITGDFVIYVIQL  
LLSFSCIYTEEVYITDHIELLVLFELLVLLYYWLSVSVMFYLMDRCHYEVLQLLLILLVLYLEGKI  
LLNSFEVVFLIMPLTDFLHYILYCLLYLLFCTLHFMILLVQAILLVFQVITIELHLLHIFYLKILLF  
LYLFLYVLLYSLCLMFGIVIIILWLILCKLLLLLYLNDTYYL SMLFDLYLINYVLRCLVLFLLCYY  
LLQIVDLEVYNLDHLVKLSEFLLISFCNVLNTLKIHLYYVNVLYYTLVILLLYYLLVTIIVLIYLI  
NLNYFIKLT KYIKIIYIFYLRYYSILGFQFIIYIILCITLHLALANLLFPLVWNNDDLIIHWWFESKK  
EIRNIFLLLLILFLKNIHFALPFSCIKMNDIKNKYLNYSYVILSYIATHIRSCINTCTCLISCSLCYSC  
KKNYGYAKKIRSCRLWTIASICCLKTFIKRICSSYTIYCSFLFRSCNNFNFCIIRLRCYTLWSW  
FRDKRHEFRYILHVSCVIFSIRYSISWLKCEIRFSRFSKYSSINLINIKFSYINSNYDNRKFKFNCL  
YISKSYLIYTTFISCVYNIFHRIYSDKSSFFSRGPANLVWSGYMSQIARKPFYFKNKRQLAGNLIP  
NKYIIKLFIDTQFNIYIYLFYIMIKDIVNHRCESTKKKHMGTPLLGESELVSGFMTEHA AVVF  
VFFFLAEYGSIVLMCILT SILFIGGYLLFEISYVFTVVNYIFFELFFIDVTFVEVQSLYTDFLNNSIIE  
GLLYGFNLGLKSSLMIFTFIARASFPRIRFDQLMGFCTVLLPINFAIIILVPCVLYSFNLLPVNIPLF  
LTHPPALLPQGYSTYEEGNRSRTILVNNYTYTKTIYHTRECNYTLFLYSTLLAYYYLYMIHLLNL  
LGYINKKFVNFFHHFLIQNTNF

>YN651

ITILKNIKSYIKIIHLYSINLKGIFSILYLVL LLSLQVFLLLGSLNRWYARLLIKVISFYLLQYLV  
LEGFIILKKCSFIHLTINTKKLKIILLMVKLLIETIKYMLNLIQMLCLVLWQLFLLHFFYYSCLIK  
NDVWVLYWYNLYLAINEYDIIYRVCICYSYFIFSHFYICSSSLSRKIYFRVWFPFRAKNTIRYKI  
LYFCFSLFTFRFRNIINFPRSV CWYLWSFSYFNFSYNNYRIYIIRKRSNRQQTKIIYTIERLPYR  
VCWNRGFVKLRQKTKKPTKGLMGSYKKMITYIYSYIYFTITRIIYIYIILLYIKIIIRYNYSILLY

KNIIYPIINFIFLIIFFYIMLTHLQMKRTKYCCYSSGYRKIFLYYLFLLGSFSVRGYMDGRRVFIL  
MNSGFKLTLFMNLNYYINVGYDRIMYSLRVKRDTPTYNTYWFRVEYIYLRVKNIYIQYIINIVI  
YWYGLNQVYILSFDKHLFFYLLLLLYCEINNYNIILHSTYLGILSYLAINDSNQILFSLVWNNDL  
LIHWFFDSKKRVNNFLDQKYYFLQKAYAFHFFDKQLLLIFGCLLVLTITKFFQFLYKFKEYKVIH  
YNILTLSMRHNQVTLVTCEILVHYLFVYKLLPVLHLCIIVLVWKLTTQSIEMITGDFVIYIVIQL  
LLSFSCIYTEEVYITDHIELLVLFELLVLLYYWLSVSVMFYLMDRCHYEVLQLLLILLVLYLEGKI  
LLNSFEVVFLIMPLTDFLHYILYCLLYLLFCTLHFMILLVQAILLVFQVITIELHLLHIFYLKILLF  
LYLFLYVLLYSLCMLFGIVIIILWLILCKLLLLLYLNDTYYSMLFDLYLINYVLRCLVLFLLCYY  
LLQIVDLEVYNLDHLVKLSEFLLISFCNVLNTLKIHLYYVNVLYYTLVILLYYLLVTHIYLIYLI  
NLNYFIKLTKYIKIIYIFYLRYYFSILGFQFIIYIILCITLHLALANLLFPLVWNNDLLIHWFFESKK  
EIRNIFLLLLILFLKNIHFALPFSCIKMNDIKNKYLNYSYVILSYIATHIRSCINTCTCLISCSLCYSC  
KKNYGYAKKIRSCCRLLWTIASICCLKTFIKRICSSYTIYCSFLFRSCNNFNFCIIRLRCTLWSW  
FRDKRHEFRYILHVSCVIFSIRYSISWLKCEIRFSRFSKYSSINLINIKFSYINSNYDNRKFKFNCL  
YISKSYLIYTTFISCVYNIFHRIYSDKSSFFSRGPANLVWSGYMSQIARKPFYFKNKRQLAGNLIP  
NKYIIKLFIDTQFNIYIYLFYIMIKDIVNHRCESTKKKHMGTHLPLLGESELVSGFMTEHAAVVF  
VFFFLAEYGSIVLMCILTILFIGGYLLFEISYVFTVVNYIFFELFFIDVTFVEVQSLYTDFLNNSIIE  
GLLYGFNLGLKSSLMIFTFIARASFPRIKFDQLMGFCTVLLPINFAIIILVPCVLYSFNLLPVNIPLF  
LTHPPALLPQGYSTYEEGNRSRTILVNNTYTKTIYHTRECNYTLFLYSTLLAYYYLYMIIILLNL  
LGYINKKFVNFFHHFLIQNTNF

>YN657

ITILKNIKSYIKIIHLYSINLKGFISILYLVLFFFSLQVFLLLGSLLNRWYARLLIKVISFYLLQYLV  
LEGFIILKKCSFIHILTINTKKLKIILLMVKLLIETIKYMLNLIIQMLCLVLWQLFLLLHFYYSCLIK  
NDVWVLYWYNLYLAINEYDIIYRVICYSYFIFSHFYICSSSLSRKIYFRVWPFPRAKNTIRYKI  
LYFCFSLFTFRFRNIINFPRSVCWYLSFSYFNFSYNRYIYIRKRSNRQQTKIYTIERLPYR  
VCWNRGFKLRQKTKKPTKGLMGSYKKMITYIYSYIYFTITRIIYIYIILLYIKIIIRYNYSILLY  
KNIIYPIINFIFLIIFFYIMLTHLQMKRTKYCCYSSGYRKIFLYYLFLLGSFSVRGYMDGRRVFIL  
MNSGFKLTLFMNLNYYINVGYDRIMYSLRVKRDTPTYNTYWFRVEYIYLRVKNIYIQYIINIVI  
YWYGLNQVYILSFDKHLFFYLLLLLYCEINNYNIILHSTYLGILSYLAINDSNQILFSLVWNNDL  
LIHWFFDSKKRVNNFLDQKYYFLQKAYAFHFFDKQLLLIFGCLLVLTITKFFQFLYKFKEYKVIH  
YNILTLSMRHNQVTLVTCEILVHYLFVYKLLPVLHLCIIVLVWKLTTQSIEMITGDFVIYIVIQL  
LLSFSCIYTEEVYITDHIELLVLFELLVLLYYWLSVSVMFYLMDRCHYEVLQLLLILLVLYLEGKI  
LLNSFEVVFLIMPLTDFLHYILYCLLYLLFCTLHFMILLVQAILLVFQVITIELHLLHIFYLKILLF  
LYLFLYVLLYSLCMLFGIVIIILWLILCKLLLLLYLNDTYYSMLFDLYLINYVLRCLVLFLLCYY  
LLQIVDLEVYNLDHLVKLSEFLLISFCNVLNTLKIHLYYVNVLYYTLVILLYYLLVTHIYLIYLI  
NLNYFIKLTKYIKIIYIFYLRYYFSILGFQFIIYIILCITLHLALANLLFPLVWNNDLLIHWFFESKK  
EIRNIFLLLLILFLKNIHFALPFSCIKMNDIKNKYLNYSYVILSYIATHIRSCINTCTCLISCSLCYSC  
KKNYGYAKKIRSCCRLLWTIASICCLKTFIKRICSSYTIYCSFLFRSCNNFNFCIIRLRCTLWSW  
FRDKRHEFRYILHVSCVIFSIRYSISWLKCEIRFSRFSKYSSINLINIKFSYINSNYDNRKFKFNCL  
YISKSYLIYTTFISCVYNIFHRIYSDKSSFFSRGPANLVWSGYMSQIARKPFYFKNKRQLAGNLIP  
NKYIIKLFIDTQFNIYIYLFYIMIKDIVNHRCESTKKKHMGTHLPLLGESELVSGFMTEHAAVVF  
VFFFLAEYGSIVLMCILTILFIGGYLLFEISYVFTVVNYIFFELFFIDVTFVEVQSLYTDFLNNSIIE  
GLLYGFNLGLKSSLMIFTFIARASFPRIKFDQLMGFCTVLLPINFAIIILVPCVLYSFNLLPVNIPLF  
LTHPPALLPQGYSTYEEGNRSRTILVNNTYTKTIYHTRECNYTLFLYSTLLAYYYLYMIIILLNL  
LGYINKKFVNFFHHFLIQNTNI

>YN661

ITILKNIKSYIKIIHLYSINLKGIFSILYLVLFFFSLQVFLLLGSLLNRWYARLLIKVISFYLLQYLV  
LEGFIILKKCSFIHLTINTKKLKIILLMVKLLIETIKYMLNLIQMLCLVLWQLFLLHFYYSCLIK  
NDVWVLYWYNLYLAINEYDIIYRVCICYSYFIFSHFYICSSSLSRKIYFRVWFPFFRAKNTIRYKI  
LYFCFSLFTFRFRNIINFPRSVWCWYLSFSYFNFYSYNNYRIYIIRKRSNRQQTKIYTIERLPYR  
VCWNRGFVKLRQKTKKPTKGLMGSYKKMITYIYSYIIFTITRIIYIYIILLYIKIIIRYNYSILLY  
KNIIYPIINFIFLIIFFYIMLTHLQMKRTKYCCYSSGYRKIFLYYLFLLGSFSVRGYMDGRRVFIL  
MNSGFKLTLFMNLNYYINVGYDRIMYSLRVKRDTPYNTYWFRVEYIYLRVKNIYIYIINIVI  
YWYGLNQVYILSFDKHLFFYLLLLLYCEINNYYNIILHSTYLGILSYLAINDSNQILFSLVWNNDL  
LIHWFFDSKKRVNNFLDQKYYFLQKAYAFHFFDKQLLLIFGCLLVLTITKFFQFLYKFKEYKVIH  
YNILTLMSRHNQVTLVTCEILVHYLFVYKLLPVLHLCIIVLVWKLTTQSIEMITGDFVIYIYIQL  
LLSFSCIYTEEVYITDHIELLVLFELLVLLYYWLSVSVMFYLMDRCHYEVLQLLLILLVLYLEGKI  
LLNSFEVVFLIMPLTDFLHYILYCLLYLLFCTLHFMILLVQAILLVFQVITIELHLLHIFYLKILLF  
LYLFLYVLLYSLCLMFGIVIIILWLILCKLLLLLYLNDTYYSMLFDLYLINYVLRCLVLFLLCYY  
LLQIVDLEVYNLDHLVKLSEFLLISFCNVLNTLKIHLYYVNVLYYTLVILLLYYLLVTIIVLIYLI  
NLNYFIKLTKYIKIIYIFYLRYYSILGFQFIIYIILCITLHLALANLLFPLVWNNDLLIHWFFESKK  
EIRNIFLLLLILFLKNIHFALPFSCIKMNDIKNKYLNYSYVILSYIATHIRSCINTCTCLISCSLCYSC  
KKNYGYAKKIRSCRLWTIASICCLKTFIKRICSSYTIYCSFLFRSCNNFNFCIIRLRCYTLWSW  
FRDKRHEFRYILHVSCVIFSIRYISWLKCEIRFSRFSKYSSINLINIKFSYINSNYDNRKFKFNCL  
YISKSYLIYTTFISCVYNIFHRIYSDKSSFFSRGPANLVWSGYMSQIARKPFYFKNKRQLAGNLIP  
NKYIIKLFIDTQFNIYIYLFYMIKDIVNHRCESTKKKHMGTPLGESELVSGFMTEHAAVVF  
VFFFLAEYGSIVLMCILTILFIGGYLLFEISYVFTVVNYIFFELFFIDVTFVEVQSLYTDFLNNSIIE  
GLLYGFNLGLKSSLMIFTIARASFPRIKFDQLMGFCTVLLPINFAIILVPCVLYSFNLLPVNIPLF  
LTHPPALLPQGYSTYEEGNRSRTILVNNTYTKTIYHTRECNYTLFLYSTLLAYYYLYMIIILLNL  
LGYINKKFVNFFHHFLIQNTNF

>YN670

ITILKNIKSYIKIIHLYSINLKGIFSILYLVLFFFSLQVFLLLGSLLNRWYARLLIKVISFYLLQYLV  
LEGFIILKKCSFIHLTINTKKLKIILLMVKLLIETIKYMLNLIQMLCLVLWQLFLLHFYYSCLIK  
NDVWVLYWYNLYLAINEYDIIYRVCICYSYFIFSHFYICSSSLSRKIYFRVWFPFFRAKNTIRYKI  
LYFCFSLFTFRFRNIINFPRSVWCWYLSFSYFNFYSYNNYRIYIIRKRSNRQQTKIYTIERLPYR  
VCWNRGFVKLRQKTKKPTKGLMGSYKKMITYIYSYIIFTITRIIYIYIILLYIKIIIRYNYSILLY  
KNIIYPIINFIFLIIFFYIMLTHLQMKRTKYCCYSSGYRKIFLYYLFLLGSFSVRGYMDGRRVFIL  
MNSGFKLTLFMNLNYYINVGYDRIMYSLRVKRDTPYNTYWFRVEYIYLRVKNIYIYIINIVI  
YWYGLNQVYILSFDKHLFFYLLLLLYCEINNYYNIILHSTYLGILSYLAINDSNQILFSLVWNNDL  
LIHWFFDSKKRVNNFLDQKYYFLQKAYAFHFFDKQLLLIFGCLLVLTITKFFQFLYKFKEYKVIH  
YNILTLMSRHNQVTLVTCEILVHYLFVYKLLPVLHLCIIVLVWKLTTQSIEMITGDFVIYIYIQL  
LLSFSCIYTEEVYITDHIELLVLFELLVLLYYWLSVSVMFYLMDRCHYEVLQLLLILLVLYLEGKI  
LLNSFEVVFLIMPLTDFLHYILYCLLYLLFCTLHFMILLVQAILLVFQVITIELHLLHIFYLKILLF  
LYLFLYVLLYSLCLMFGIVIIILWLILCKLLLLLYLNDTYYSMLFDLYLINYVLRCLVLFLLCYY  
LLQIVDLEVYNLDHLVKLSEFLLISFCNVLNTLKIHLYYVNVLYYTLVILLLYYLLVTIIVLIYLI  
NLNYFIKLTKYIKIIYIFYLRYYSILGFQFIIYIILCITLHLALANLLFPLVWNNDLLIHWFFESKK  
EIRNIFLLLLILFLKNIHFALPFSCIKMNDIKNKYLNYSYVILSYIATHIRSCINTCTCLISCSLCYSC  
KKNYGYAKKIRSCRLWTIASICCLKTFIKRICSSYTIYCSFLFRSCNNFNFCIIRLRCYTLWSW  
FRDKRHEFRYILHVSCVIFSIRYISWLKCEIRFSRFSKYSSINLINIKFSYINSNYDNRKFKFNCL

YISKSYLIYTTFISCVYNIFHRIYSDKSSFFSRGPANLVWSGYMSQIARKPFYFKNKRQLAGNLIP  
NKYIIKLFIDTQFNIYIYLFYIMIKDIVNHRCESTKKKHMGTPLLGESSELVSGFMTEHA AVVF  
VFFFLAEYGSIVLMCILTILFIGGYLLFEISYVFTVVNYIFFELFFIDVTFVEVQSLYTDFLNNSIIE  
GLLYGFNLGLKSSLMIFTFIARASFPRIKFDQLMGFCTVLLPINFAIHLVPCVLYSFNLLPVNIPLF  
LTHPPALLPQGYSTYEEGNRSRTILVNNYTYTKTIYHTRECNYTLFLYSTLLAYYYLYMIHLLNL  
LGYINKKFVNFFHHFLIQNTNI

>YN673

ITILKNIKSYIKIIHLYSINLKGIFSILYLVLFFFSLQVFLLLGSLLNRWYARLLIKVISFYLLQYLV  
LEGFIHLLKKCSFIHLLTINTKKLKIILLMVKLLIETIKYMLNLIQMLCLVLWQLFLLHFYYSCLIK  
NDVWVLYWYNLYLAINEYDIIYRVCICYSYFIFSHFYICSSSLSRKIYFRVWFPFRAKNTIRYKI  
LYFCFSLFTFRFRNIINFPRSVWCWYLSFSYFNFYSYNNYRIYIIRKRSNRQQTKIYTIERLPYR  
VCWNRGFVKLRQKTKKPTKGLMGSYKKMITYIYSYIFTITRIIYIYIILLYIKIIIRYNYSILLY  
KNIIYPIINFIFLIIFFYIMLTHLQMKRTKYCCYSSGYRKIFLYYFLLLGSFSVRGYMDGRRVFIL  
MNSGFKLTLFMNLNYYINVGYDRIMYSLRVKRDPTTYNTYWFRVEYIYLRVKNIYIYIINIVI  
YWYGLNQVYILSFDKHLFFYLLLLLYCEINNYNIILHSTYLGILSYLAINDSNQILFSLVWNNDL  
LIHWFFDSKKRVNFDQKYYFLQKAYAFHFFDKQLLLIFGCLLVLTITKFFQFLYKFKEYKVIH  
YNILTLMSRHNQVTLVTCEILVHYLFVYKLLPVLHLCIIVLVWKLTTQSIEMITGDFVIYIYIQL  
LLSFSCIYTEEVYITDHIELLVLFELLVLLYYWLSVSVMFYLMDRCHYEVLQLLLILLVLYLEGKI  
LLNSFEVVFLIMPLTDFLHYILYCLLYLLFCTLHFMILLVQAILLVFQVITIELHLLHIFYLKILLF  
LYLFLYVLLYSLCMLFGIVIIHLWLILCKLLLLLYLNDTYYSMLFDLYLINYVLRCLVLFLLCYY  
LLQIVDLEVYNLDHLVKLSEFLLISFCNVLNTLKIHLYYVNVLYYTLVILLLYYLLVTIIVLIYLI  
NLNYFIKLTKYIKIIYIFYLRYYSILGFQFIYIILCITLHLALANLLFPLVWNNDLLIHWFFESKK  
EIRNIFLLLLILFLKNIHFALPFSCIKMNDIKNKYLNYSYVILSYIATHIRSCINTCTCLISCSLCYSC  
KKNYGYAKKIRSCRLWLTIASICCLKTFIKRICSSYTIYCSFLFRSCNNFNFCIIRLRCTLWSW  
FRDKRHEFRYILHVSCVIFSIRYSISWLKCEIRFSRFSKYSSINLINIKFSYINSNYDNRKFKFNCL  
YISKSYLIYTTFISCVYNIFHRIYSDKSSFFSRGPANLVWSGYMSQIARKPFYFKNKRQLAGNLIP  
NKYIIKLFIDTQFNIYIYLFYIMIKDIVNHRCESTKKKHMGTPLLGESSELVSGFMTEHA AVVF  
VFFFLAEYGSIVLMCILTILFIGGYLLFEISYVFTVVNYIFFELFFIDVTFVEVQSLYTDFLNNSIIE  
GLLYGFNLGLKSSLMIFTFIARASFPRIKFDQLMGFCTVLLPINFAIHLVPCVLYSFNLLPVNIPLF  
LTHPPALLPQGYSTYEEGNRSRTILVNNYTYTKTIYHTRECNYTLFLYSTLLAYYYLYMIHLLNL  
LGYINKKFVNFFHHFLIQNTNF

>YN690

ITILKNIKSYIKIIHLYSINLKGIFSILYLVLFFFSLQVFLLLGSLLNRWYARLLIKVISFYLLQYLV  
LEGFIHLLKKCSFIHLLTINTKKLKIILLMVKLLIETIKYMLNLIQMLCLVLWQLFLLHFYYSCLIK  
NDVWVLYWYNLYLAINEYDIIYRVCICYSYFIFSHFYICSSSLSRKIYFRVWFPFRAKNTIRYKI  
LYFCFSLFTFRFRNIINFPRSVWCWYLSFSYFNFYSYNNYRIYIIRKRSNRQQTKIYTIERLPYR  
VCWNRGFVKLRQKTKKPTKGLMGSYKKMITYIYSYIFTITRIIYIYIILLYIKIIIRYNYSILLY  
KNIIYPIINFIFLIIFFYIMLTHLQMKRTKYCCYSSGYRKIFLYYFLLLGSFSVRGYMDGRRVFIL  
MNSGFKLTLFMNLNYYINVGYDRIMYSLRVKRDPTTYNTYWFRVEYIYLRVKNIYIYIINIVI  
YWYGLNQVYILSFDKHLFFYLLLLLYCEINNYNIILHSTYLGILSYLAINDSNQILFSLVWNNDL  
LIHWFFDSKKRVNFDQKYYFLQKAYAFHFFDKQLLLIFGCLLVLTITKFFQFLYKFKEYKVIH  
YNILTLMSRHNQVTLVTCEILVHYLFVYKLLPVLHLCIIVLVWKLTTQSIEMITGDFVIYIYIQL  
LLSFSCIYTEEVYITDHIELLVLFELLVLLYYWLSVSVMFYLMDRCHYEVLQLLLILLVLYLEGKI  
LLNSFEVVFLIMPLTDFLHYILYCLLYLLFCTLHFMILLVQAILLVFQVITIELHLLHIFYLKILLF

LYLFLYVLLYSLCLMFGIVIIILWLILCKLLLLLYLNDTYYLSMLFDLYLINYVLRCLVLFLLCYY  
LLQIVDLEVYNLDHLVKLSEFLLISFCNVLNTLKIHLYYVNVLYYTLVILLYYLLVTHIYLIYLI  
NLNYFIKLTKYIKIIYIFYLRYYSILGFQFIIYIILCITLHLALANLLFPLVWNNDDLHWWFESKK  
EIRNIFLLLLLILFLKNIHFALPFSCIKMNDIKNKYLNYSYVILSYIATHIRSCINTCTCLISCSLCYSC  
KKNYGYAKKIRSCCRLLWTIASICCLKTFIKRICSSYTIYCSFLFRSCNNFNFCIIRLRCTLWSW  
FRDKRHEFRYILHVSCVIFSIRYSISWLKCEIRFSRFSKYSSINLINIKFSYINSNYDNRKFKFNCL  
YISKSYLIYTTFISCVYNIFHRIYSDKSSFFSRGPANLVWSGYMSQIARKPFYFKNKRQLAGNLIP  
NKYIIKLFIDTQFNIYIYLFYIMIKDIVNHRCESTKKKHMGTPLGESELVSGFMTEHAAVVF  
VFFFLAEYGSIVLMCILTSILFIGGYLLFEISYVFTVVNYIFFELFFIDVTFVEVQSLYTDFLNNSIIE  
GLLYGFNLGLKSSLMIFTFIARASFPRIKFDQLMGFCTVLLPINFAIIILVPCVLYSFNLLPVNIPLF  
LTHPPALLPQGYSTYEEGNRSRTILVNNTYTKTIYHTRECNYTLFLYSTLLAYYYLYMIIILLNL  
LGYINKKFVNFFHHFLIQNTNF

>YN694

ITILKNIKSYIKIIHLYSINLKGIFSILYLVLFFFSLQVFLLLGSLLNRWYARLLIKVISFYLLQYLV  
LEGFIILKKCSFIHILTINTKKLKIILLMVKLLIETIKYMLNLIQMLCLVLWQLFLLHFYYSCLIK  
NDVWVLYWYNLYLAINEYDIIYRVCICYSYFIFSHFYICSSSLSRKIYFRVWFPFRKANTIRYKI  
LYFCFSLFTFRFRNIINFPRSVWCWYLSFSYFNFYSYNNYRIYIIRKRSNRQQTKIYTIERLPYR  
VCWNRGFKLRQKTKKPTKGLMGSYKKMITYIYSYIFTITRIIYIYIILLYIKIIIRYNYSILLY  
KNIYPIINFIFLIIFFYIMLTHLQMKRTKYCCYSSGYRKIFLYYLFLLGSFSVRGYMDGRRVFIL  
MNSGFKLTLFMNLNNTYINVGDRIMYSLRVKRDTPYNTYWFRVEYIYLRVKNIYIYIINIVI  
YWYGLNQVYILSFDKHLFFYLLLLLYCEINNYNILHSTYLGILSYLAINDSNQILFSLVWNNDL  
LIHWWFDSKKRVNNFLDQKYYFLQKAYAFHFFDKQLLLIFGCLLVLTITKFFQFLYKFKEYKVIH  
YNILTLMSMRHNQVTLVTCILVHYLFVYKLLPVLHLCIIVLVWKLTTQSIEMITGDFVIYIYIQL  
LLSFSCIYTEEVYITDHIELLVLFELLVLLYYWLSVSVMFYLMDRCHYEVLQLLLILLVLYLEGKI  
LLNSFEVVFLIMPLTDFLHYILYCLLYLLFCTLHFMILLVQAILLVFQVITIELHLLHIFYLKILLF  
LYLFLYVLLYSLCLMFGIVIIILWLILCKLLLLLYLNDTYYLSMLFDLYLINYVLRCLVLFLLCYY  
LLQIVDLEVYNLDHLVKLSEFLLISFCNVLNTLKIHLYYVNVLYYTLVILLYYLLVTHIYLIYLI  
NLNYFIKLTKYIKIIYIFYLRYYSILGFQFIIYIILCITLHLALANLLFPLVWNNDDLHWWFESKK  
EIRNIFLLLLLILFLKNIHFALPFSCIKMNDIKNKYLNYSYVILSYIATHIRSCINTCTCLISCSLCYSC  
KKNYGYAKKIRSCCRLLWTIASICCLKTFIKRICSSYTIYCSFLFRSCNNFNFCIIRLRCTLWSW  
FRDKRHEFRYILHVSCVIFSIRYSISWLKCEIRFSRFSKYSSINLINIKFSYINSNYDNRKFKFNCL  
YISKSYLIYTTFISCVYNIFHRIYSDKSSFFSRGPANLVWSGYMSQIARKPFYFKNKRQLAGNLIP  
NKYIIKLFIDTQFNIYIYLFYIMIKDIVNHRCESTKKKHMGTPLGESELVSGFMTEHAAVVF  
VFFFLAEYGSIVLMCILTSILFIGGYLLFEISYVFTVVNYIFFELFFIDVTFVEVQSLYTDFLNNSIIE  
GLLYGFNLGLKSSLMIFTFIARASFPRIKFDQLMGFCTVLLPINFAIIILVPCVLYSFNLLPVNIPLF  
LTHPPALLPQGYSTYEEGNRSRTILVNNTYTKTIYHTRECNYTLFLYSTLLAYYYLYMIIILLNL  
LGYINKKFVNFFHHFLIQNTNY

>YN714

ITILKNIKSYIKIIHLYSINLKGIFSILYLVLFFFSLQVFLLLGSLLNRWYARLLIKVISFYLLQYLV  
LEGFIILKKCSFIHILTINTKKLKIILLMVKLLIETIKYMLNLIQMLCLVLWQLFLLHFYYSCLIK  
NDVWVLYWYNLYLAINEYDIIYRVCICYSYFIFSHFYICSSSLSRKIYFRVWFPFRKANTIRYKI  
LYFCFSLFTFRFRNIINFPRSVWCWYLSFSYFNFYSYNNYRIYIIRKRSNRQQTKIYTIERLPYR  
VCWNRGFKLRQKTKKPTKGLMGSYKKMITYIYSYIFTITRIIYIYIILLYIKIIIRYNYSILLY  
KNIYPIINFIFLIIFFYIMLTHLQMKRTKYCCYSSGYRKIFLYYLFLLGSFSVRGYMDGRRVFIL

MNSGFKLTLFMNLNYYINVGYDRIMYSLRVKRDTPYNTYWFRVEYIYLRVKNIYIQYIINIVI  
YWYGLNQVYILSFDKHLFFYLLLLLYCEINNYNIILHSTYLGILSYLAINDSNQILFSLVWNNDL  
LIHWFFDSKKRVNNFLDQKYYFLQKAYAFHFFDKQLLLIFGCLLVLTITKFFQFLYKFKEYKVIH  
YNILTLSMRHNQVTLVTCEILVHYLFVYKLLPVLHLCIIVLVWKLQTQSIEMITGDFVIYIVIQ  
LLSFSCIYTEEVYITDHIELLVLFELLVLLYYWLSVSVMFYLMDRCHYEVLQLLLILLVLYLEGKI  
LLNSFEVVFLIMPLTDFLHYILYCLLYLLFCTLHFMILLVQAILLVFQVITIELHLLHIFYLKILLF  
LYLFLYVLLYSLCCLMFGIVIIILWLILCKLLLLLYLNDTYYSMLFDLYLINYVLRCLVLFLLCY  
LLQIVDLEVYNLDHLVKLSEFLLISFCNVLNTLKIHLYYVNVLYYTLVILLYYLLVTIIVLIYLI  
NLNYFIKLTKYIKIIYIFYLRYYSILGFQFIYIILCITLHLALANLLFPLVWNNDLLIHWFFESKK  
EIRNIFLLLLILFLKNIHFALPFSCIKMNDIKNKYLNYSYVILSYIATHIRSCINTCTCLISCSLCYSC  
KKNYGYAKKIRSCRLWTIASICCLKTFIKRICSSYTIYCSFLFRSCNNFNFCIIRLRCTLWSW  
FRDKRHEFRYILHVSCVIFSIRYSISWLKCEIRFSRFSKYSSINLINIKFSYINSNYDNRKFKFNCL  
YISKSYLIYTTFISCVYNIFHRIYSDKSSFFSRGPANLVWSGYMSQIARKPFYFKNKRQLAGNLIP  
NKYIIKLFIDTQFNIIYIFYIYMIKDIVNHRCESTKKKHMGTPLGESELVSGFMTEHA AVF  
VFFFLAEYGSIVLMCILTILFIGGYLLFEISYVFTVVNYIFFELFFIDVTFVEVQSLYTDFLNNSIIE  
GLLYGFNLGLKSSLMIFTFIARASFPRIKFDQLMGFCTVLLPINFAIILVPCVLYSFNLLPVNIPLF  
LTHPPALLPQGYSTYEEGNRSRTILVNNYTYTKTIYHTRECNYTLFLYSTLLGYYYLYMIILLNL  
LGYINKKFVNFFHHFLIQNTNF

>YN716

ITILKNIKSYIKIIHLYSINLKGIFSILYLVLLFSLLQVFLLLGSLNRWYARLLIKVISFYLLQYLV  
LEGFIILKKCSFIHLLTINTKKLKIILLMVKLLIETIKYMLNLIQMLCLVLWQLFLLHFYYSCLIK  
NDVWVLYWYNLYLAINEYDIIYRVCICYSYFIFSHFYICSSLSRKIYFRVWFPFFRAKNTIRYKI  
LYFCFSLFTFRFRNIINFPFRSVCWYLWSFSYFNFSYNNYRIYIIRKRSNRQQTKIIYTIERLPYR  
VCWNRGFKLRQKTKKPTKGLMGSYKKMITYIYSYIYFTITRIIYIYIILYIKIIIRYNYSILLY  
KNIIYPIINFIFFLIIFFYIMLTHLQMKRTKYCCYSSGYRKIFLYYFLLGSFSVRGYMDGRRVFIL  
MNSGFKLTLFMNLNYYINVGYDRIMYSLRVKRDTPYNTYWFRVEYIYLRVKNIYIQYIINIVI  
YWYGLNQVYILSFDKHLFFYLLLLLYCEINNYNIILHSTYLGILSYLAINDSNQILFSLVWNNDL  
LIHWFFDSKKRVNNFLDQKYYFLQKAYAFHFFDKQLLLIFGCLLVLTITKFFQFLYKFKEYKVIH  
YNILTLSMRHNQVTLVTCEILVHYLFVYKLLPVLHLCIIVLVWKLQTQSIEMITGDFVIYIVIQ  
LLSFSCIYTEEVYITDHIELLVLFELLVLLYYWLSVSVMFYLMDRCHYEVLQLLLILLVLYLEGKI  
LLNSFEVVFLIMPLTDFLHYILYCLLYLLFCTLHFMILLVQAILLVFQVITIELHLLHIFYLKILLF  
LYLFLYVLLYSLCCLMFGIVIIILWLILCKLLLLLYLNDTYYSMLFDLYLINYVLRCLVLFLLCY  
LLQIVDLEVYNLDHLVKLSEFLLISFCNVLNTLKIHLYYVNVLYYTLVILLYYLLVTIIVLIYLI  
NLNYFIKLTKYIKIIYIFYLRYYSILGFQFIYIILCITLHLALANLLFPLVWNNDLLIHWFFESKK  
EIRNIFLLLLILFLKNIHFALPFSCIKMNDIKNKYLNYSYVILSYIATHIRSCINTCTCLISCSLCYSC  
KKNYGYAKKIRSCRLWTIASICCLKTFIKRICSSYTIYCSFLFRSCNNFNFCIIRLRCTLWSW  
FRDKRHEFRYILHVSCVIFSIRYSISWLKCEIRFSRFSKYSSINLINIKFSYINSNYDNRKFKFNCL  
YISKSYLIYTTFISCVYNIFHRIYSDKSSFFSRGPANLVWSGYMSQIARKPFYFKNKRQLAGNLIP  
NKYIIKLFIDTQFNIIYIFYIYMIKDIVNHRCESTKKKHMGTPLGESELVSGFMTEHA AVF  
VFFFLAEYGSIVLMCILTILFIGGYLLFEISYVFTVVNYIFFELFFIDVTFVEVQSLYTDFLNNSIIE  
GLLYGFNLGLKSSLMIFTFIARASFPRIKFDQLMGFCTVLLPINFAIILVPCVLYSFNLLPVNIPLF  
LTHPPALLPQGYSTYEEGNRSRTILVNNYTYTKTIYHTRECNYTLFLYSTLLAYYYLYMIILLNL  
LGYINKKFVNFFHHFLIQNTNF

>YN718

ITILKNIKSYIKIIHLYSINLKGIFSILYLVLFFFSLQVFLLLGSLLNRWYARLLIKVISFYLLQYLV  
LEGFIILKKCSFIHLTINTKKLKIILLMVKLLIETIKYMLNLIQMLCLVLWQLFLLHFYYSCLIK  
NDVWVLYWYNLYLAINEYDIIYRVCICYSYFIFSHFYICSSSLSRKIYFRVWFPFFRAKNTIRYKI  
LYFCFSLFTFRFRNIINFPRSVCWYLSFSYFNFYSYNNYRIYIIRKRSNRQQTKIYTIERLPYR  
VCWNRGFVKLRQKTKKPTKGLMGSYKKMITYIYSYIFTITRIIYIYIILLYIKIIIRYNYSILLY  
KNIIYPIINFIFFLIIFFYIMLTHLQMKRTKYCCYSSGYRKIFLYYLFLLGSFSVRGYMDGRRVFIL  
MNSGFKLTLFMNLNYYINVGYDRIMYSLRVKRDTPTYNTYWFRVEYIYLRVKNIYIYIINIVI  
YWYGLNQVYILSFDKHLFFYLLLLLYCEINNYYNIILHSTYLGILSYLAINDSNQILFSLVWNNDL  
LIHWFFDSKKRVNFDQKYYFLQKAYAFHFFDKQLLLIFGCLLVLTITKFFQFLYKFKEYKVIH  
YNILTSMRHNQVTLVTCEILVHYLFVYKLLPVLHLCIIVLVWKLTTQSIEMITGDFVIYIYIQL  
LLSFSCIYTEEVYITDHIELLVLFELLVLLYYWLSVSVMFYLMDRCHYEVLQLLLILLVLYLEGKI  
LLNSFEVVFLIMPLTDFLHYILYCLLYLLFCTLHFMILLVQAILLVFQVITIELHLLHIFYLKILLF  
LYLFLYVLLYSLCMLFGIVIIILWLILCKLLLLLYLNDTYYSMLFDLYLINYVLRCLVLFLLCYY  
LLQIVDLEVYNLDHLVKLSEFLLISFCNVLNTLKIHLYYVNVLYYTLVILLYYLLVTHIYLIYLI  
NLNYFIKLTKYIKIIYIFYLRYYFSILGFQFIYIILCITLHLALANLLFPLVWNNDLLIHWFFESKK  
EIRNIFLLLLILFLKNIHFALPFSCIKMNDIKNKYLNYSYVILSYIATHIRSCINTCTCLISCSLCYSC  
KKNYGYAKKIRSCCRLLWTIASICCLKTFIKRICSSYTIYCSFLFRSCNNFNFCIIRLRCTYTLWSW  
FRDKRHEFRYILHVSCVIFSIRYSISWLKCEIRFSRFSKYSSINLINIKFSYINSNYDNRKFKFNCL  
YISKSYLIYTTFISCVYNIFHRIYSDKSSFFSRGPANLVWSGYMSQIARKPFYFKNKRQLAGNLIP  
NKYIILFIDTQFNIYIYLFYIMIKDIVNHRCESTKKKHMGTPLLGESELVSGFMTEHAAVVF  
VFFFLAEYGSIVLMCILTILFIGGYLLFEISYVFTVVNYIFFELFFIDVTFVEVQSLYTDFLNNSIIE  
GLLYGFNLGLKSSLMIFTFIARASFPRIKFDQLMGFCTVLLPINFAIILVPCVLYSFNLLPVNIPLF  
LTHPPALLPQGYSTYEEGNRSRTILVNNTYTKTIYHTRECNYTLFLYSTLLAYYYLYMIIILLNL  
LGYINKKFVNFFHHFLIQNTNF

>YN735

ITILKNIKSYIKIIHLYSINLKGIFSILYLVLFFFSLQVFLLLGSLLNRWYARLLIKVISFYLLQYLV  
LEGFIILKKCSFIHLTINTKKLKIILLMVKLLIETIKYMLNLIQMLCLVLWQLFLLHFYYSCLIK  
NDVWVLYWYNLYLAINEYDIIYRVCICYSYFIFSHFYICSSSLSRKIYFRVWFPFFRAKNTIRYKI  
LYFCFSLFTFRFRNIINFPRSVCWYLSFSYFNFYSYNNYRIYIIRKRSNRQQTKIYTIERLPYR  
VCWNRGFVKLRQKTKKPTKGLMGSYKKMITYIYSYIFTITRIIYIYIILLYIKIIIRYNYSILLY  
KNIIYPIINFIFFLIIFFYIMLTHLQMKRTKYCCYSSGYRKIFLYYLFLLGSFSVRGYMDGRRVFIL  
MNSGFKLTLFMNLNYYINVGYDRIMYSLRVKRDTPTYNTYWFRVEYIYLRVKNIYIYIINIVI  
YWYGLNQVYILSFDKHLFFYLLLLLYCEINNYYNIILHSTYLGILSYLAINDSNQILFSLVWNNDL  
LIHWFFDSKKRVNFDQKYYFLQKAYAFHFFDKQLLLIFGCLLVLTITKFFQFLYKFKEYKVIH  
YNILTSMRHNQVTLVTCEILVHYLFVYKLLPVLHLCIIVLVWKLTTQSIEMITGDFVIYIYIQL  
LLSFSCIYTEEVYITDHIELLVLFELLVLLYYWLSVSVMFYLMDRCHYEVLQLLLILLVLYLEGKI  
LLNSFEVVFLIMPLTDFLHYILYCLLYLLFCTLHFMILLVQAILLVFQVITIELHLLHIFYLKILLF  
LYLFLYVLLYSLCMLFGIVIIILWLILCKLLLLLYLNDTYYSMLFDLYLINYVLRCLVLFLLCYY  
LLQIVDLEVYNLDHLVKLSEFLLISFCNVLNTLKIHLYYVNVLYYTLVILLYYLLVTHIYLIYLI  
NLNYFIKLTKYIKIIYIFYLRYYFSILGFQFIYIILCITLHLALANLLFPLVWNNDLLIHWFFESKK  
EIRNIFLLLLILFLKNIHFALPFSCIKMNDIKNKYLNYSYVILSYIATHIRSCINTCTCLISCSLCYSC  
KKNYGYAKKIRSCCRLLWTIASICCLKTFIKRICSSYTIYCSFLFRSCNNFNFCIIRLRCTYTLWSW  
FRDKRHEFRYILHVSCVIFSIRYSISWLKCEIRFSRFSKYSSINLINIKFSYINSNYDNRKFKFNCL  
YISKSYLIYTTFISCVYNIFHRIYSDKSSFFSRGPANLVWSGYMSQIARKPFYFKNKRQLAGNLIP

NKYIIKLFIDTQFNIIYLFYIMIKDIVNHRCESTKKKHMGTPLGSELSVSGFMTEHAAVVF  
VFFFLAEYGSIVLMCILTSILFIGGYLLFEISYVFTVVNYIFFELFFIDVTFVEVQSLYTDFLNNNSIIE  
GLLYGFNLGLKSSLMIFTFIARASFPRIKFDQLMGFCTVLLPINFAIHLVPCVLYSFNLLPVNIPLF  
LTHPPALLPQGYSTYEEGNRSRTILVNNYTYTKTIYHTRECNYTLFLYSTLLAYYYLYMIIILLNL  
LGYINKKFVNFFHHFLIQNTN

>YN745

ITILKNIKSYIKIIHLYSINLKGIFSILYLVLFFFSLQVFLLLGSLLNRWYARLLIKVISFYLLQYLV  
LEGFIILKKCSFIHLTINTKKLKIILLMVKLLIETIKYMLNLIQMLCLVLWQLFLLHFFYYSCLIK  
NDVWVLYWYNLYLAINEYDIIYRVCICYSYFIFSHFYICSSSLSRKIYFRVWFPFRAKNTIRYKI  
LYFCFSLFTFRFRNIINFPRSVWCWYLSFSYFNFSYNRYIIRKRSNRQQTKIYTIERLPYR  
VCWNRGFVKLRQKTKKPTKGLMGSYKKMITYIYSYIFTITRIIYIYIILLYIKIIIRYNYSILLY  
KNIIYPIINFIFLIIFFYIMLTHLQMKRTKYCCYSSGYRKIFLYYFLLLGSFSVRGYMDGRRVFIL  
MNSGFKLTLFMNLNRYNINVGYDRIMYSLRVKRDPTTYNTYWFRVEYIYLRVKNIYIYIINIVI  
YWYGLNQVYILSFDKHLFFYLLLLLYCEINNRYNIIHSTYLGILSYLAINDSNQILFSLVWNNDL  
LIHWFFDSKKRVNNFLDQKYYFLQKAYAFHFFDKQLLLIFGCLLVLTITKFFQFLYKFKEYKVIH  
YNILTLMSMRHNQVTLVTCEILVHYLFVYKLLPVLHLCIIVLVWKLTTQSIEMITGDFVIYIYIQL  
LLSFSCIYTEEVYITDHIELLVLFELLVLLYYWLSVSVMFYLMDRCHYEVLQLLLILLVLYLEGKI  
LLNSFEVVFLIMPLTDFLHYILYCLLYLLFCTLHFMILLVQAILLVFQVITIELHLLHIFYLKILLF  
LYLFLYVLLYSLCLMFGIVIIILWLILCKLLLLLYLNDTYYSMLFDLYLINYVLRCLVLFLLCYY  
LLQIVDLEVYNLDHLVKLSEFLLISFCNVLNTLKIHLYYVNVLYYTLVILLYYLLVTIIVLIYLI  
NLNYFIKLTKYIKIIYIFYLRYYSILGFQFIYIILCITLHLALANLLFPLVWNNDLLIHWFFESKK  
EIRNIFLLLLILFLKNIHFALPFSCIKMNDIKNKYLNYSYVILSYIATIRSCINTCTCLISCSLCYSC  
KKNYGYAKKIRSCRLWTIASICCLKTFIKRICSSYTIYCSFLFRSCNNFNFCIIRLRCYTLWSW  
FRDKRHEFRYILHVSCVIFSIRYSISWLKCEIRFSRFSKYSSINLINIKFSYINSNYDNRKFKFNCL  
YISKSYLIYTTFISCVYNIFHRIYSDKSSFFSRGPANLVWSGYMSQIARKPFYFKNKRQLAGNLIP  
NKYIIKLFIDTQFNIIYLFYIMIKDIVNHRCESTKKKHMGTPLGSELSVSGFMTEHAAVVF  
VFFFLAEYGSIVLMCILTSILFIGGYLLFEISYVFTVVNYIFFELFFIDVTFVEVQSLYTDFLNNNSIIE  
GLLYGFNLGLKSSLMIFTFIARASFPRIKFDQLMGFCTVLLPINFAIHLVPCVLYSFNLLPVNIPLF  
LTHPPALLPQGYSTYEEGNRSRTILVNNYTYTKTIYHTRECNYTLFLYSTLLAYYYLYMIIILLNL  
LGYINKKFVNFFHHFLIQNTNF

>Z-2

ITILKNIKSYIKIIHLYSINLKGIFSILYLVLFFFSLQVFLLLGSLLNRWYARLLIKVISFYLLQYLV  
LEGFIILKKCSFIHLTINTKKLKIILLMVKLLIETIKYMLNLIQMLCLVLWQLFLLHFFYYSCLIK  
NDVWVLYWYNLYLAINEYDIIYRVCICYSYFIFSHFYICSSSLSRKIYFRVWFPFRAKNTIRYKI  
LYFCFSLFTFRFRNIINFPRSVWCWYLSFSYFNFSYNRYIIRKRSNRQQTKIYTIERLPYR  
VCWNRGFVKLRQKTKKPTKGLMGSYKKMITYIYSYIFTITRIIYIYIILLYIKIIIRYNYSILLY  
KNIIYPIINFIFLIIFFYIMLTHLQMKRTKYCCYSSGYRKIFLYYFLLLGSFSVRGYMDGRRVFIL  
MNSGFKLTLFMNLNRYNINVGYDRIMYSLRVKRDPTTYNTYWFRVEYIYLRVKNIYIYIINIVI  
YWYGLNQVYILSFDKHLFFYLLLLLYCEINNRYNIIHSTYLGILSYLAINDSNQILFSLVWNNDL  
LIHWFFDSKKRVNNFLDQKYYFLQKAYAFHFFDKQLLLIFGCLLVLTITKFFQFLYKFKEYKVIH  
YNILTLMSMRHNQVTLVTCEILVHYLFVYKLLPVLHLCIIVLVWKLTTQSIEMITGDFVIYIYIQL  
LLSFSCIYTEEVYITDHIELLVLFELLVLLYYWLSVSVMFYLMDRCHYEVLQLLLILLVLYLEGKI  
LLNSFEVVFLIMPLTDFLHYILYCLLYLLFCTLHFMILLVQAILLVFQVITIELHLLHIFYLKILLF  
LYLFLYVLLYSLCLMFGIVIIILWLILCKLLLLLYLNDTYYSMLFDLYLINYVLRCLVLFLLCYY

LLQIVDLEVYNLDHLVKLSEFLLLSFCNVLNTLKIHLYYVNVLYYTLVILLLYLLVTIIVLIYLI  
NLNYFIKLTKYIKIIYIFYLRYYSILGFQFIIYIILCITLHLALANLLFPLVWNNDLLIHWFFESKK  
EIRNIFLLLLLILFLKNIHFALPFSCIKMNDIKNKYLNYSYVILSYIATHIRSCINTCTCLISCSLCYSC  
KKNYGYAKKIRSCCRLLWTIASICCLKTFIKRICSSYTIYCSFLFRSCNNFNFCIIRLRCYTLWSW  
FRDKRHEFRYILHVSCVIFSIRYSISWLKCEIRFSRFSKYSSINLINIKFSYINSNYDNRKFKFNCL  
YISKSYLIYTTFISCVYNIFHRIYSDKSSFFSRGPANLVWSGYMSQIARKPFYFKNKRQLAGNLIP  
NKYIIKLFIDTQFNIIYLYFIYMIKDIVNHRCESTKKKHMGTPLLLGESELVSGFMTEHA AVVF  
VFFFLAEYGSIVLMCILTILFIGGYLLFEISYVFTVVNYIFFELFFIDVTFVEVQSLYTDNFLNNSIIE  
GLLYGFNLGLKSSLMIFTFIARASFPRIRFDQLMGFCTVLLPINFAIIILVPCVLYSFNLLPVNIPLF  
LTHPPALLPQGYSTYEEGNRSRTILVNNTYTKTIYHTRECNYTLFLYSTLLAYYYLYMIIILLNL  
LGYINKKFVNFFHHFLIQNTNF
