# Supplementary material for: ABCC Transporter Gene MoABC-R1 Is Associated with Pyraclostrobin Tolerance in Magnaporthe oryzae
Source: MDPI journal article supplement (doi:10.3390/jof9090917), 2023-09-11
Supplement: s1 [file s1]

>RB22

ATAACAATTCTAAAGAACATAAAGAGTTATTAGATAAAAAATAATTCACCTATACAGTTAATAAAT  
CAACTTAAAGGGTATTTTTTCATAAATCCTTTATTAGCTTTAAGTTTAGCTATTACTATTTCTCTTT  
TGCAGGTATTCCTCCTCTTGAGGGTCTTTGCTAAACAGATGGTATTAAGCGCGGCTATTGATC  
AAGGTTATATCTTTTTATCTTTAGTTGCAATATTAAGTAGTGTTATAGGAGGGGTTTATTATTTAAA  
TATAATTAAGAAATGTTCTTTTATTCACCTGACTATAAATTAACGAAGAAATTAATAAATAATAC  
TATTAATGGTCAAATTATTAATAGAAACAATAAAATATTAAATGTTGAATTTAATTATACAAATGT  
AGTTATGTCTAGTTCTGTGGCAATAACTATTTCTACTATTACATTAGTAGTTTTATTATTCATGTTT  
ATGAATAAAGAATGATTAAGTCTGGGTACTATATTGGTACAATCTTTATTTAGCTATTAATGAGTA  
GTATGACATTATTTATAGGGTTTGTATCTGTTATAGCTATTTTATTTTATAGCCATTAATTTATATTT  
GCTCCTCATAATCCTTATCAAGAAAAATATAGTATTTTCGAGTGTGGTTTCCATAGTTTTTATAGG  
CAAAATAGAACACAATTCGGTATAAAATTCTTTATTTTGTCTTAGTTTATTTACTTTTAGATTTAG  
AAATATTATTAACTTTCCCTTTCGCTCTTAGTGAGTATGTTAATGGTATTTATGGTCTTTTAGTTAC  
TTTAATTTTTATAGCTATAATAACTATAGGATTTATATTTGAATTAGGTAAAAGCGCTCTTAAATA  
GACAGCAGACAAAAATTATATATACCTAAATTGAACGTTAATTACCATACAGAGTATGTTGGAAT  
AGGTAAGGTTTCTAAGTAAAGTTATAGAGGCAGAAAACCAAAAAACCTACCAAAGGGTAGCTA  
ATGGGAAGCTATTAATAAATAAAGATGATAACCTATATATAGTATAGTTACTATATATTTACTATA  
ACTAGGATTATTATATATATATATATTATCTTATTGTATATTAAGATTATTATTATTATAAGGTATA  
ATTAATATAGTATCTTATTGTATAAGAATATAATATATTAACCTATAATTAATTTTATTTTTAATTT  
TTAATTATAATTTTTTTTTATATCTAGATGCTTACACATCTACAGATGTAGAAGAGAACAAAATAT  
TGTTGTTATAGTAGTGATATAGAAAAATATTTTTATATTATTTATTTTGTAGGTAGCTTTT  
GAAGTGTTTGATAGAGAGGATATATGGACGGTAGGAGGGTATTCATTTTAAATGAACAGTGGATA  
GTTTAAATTAACCTAGTTATAGTTTATGAATTTAAATTATAATTATATTAATGTAGGTTATGATAGA  
ATTATGTATTGATCCTTAAGAGTTAAGAGAGATACGCCACGTATAATACATATTGGTTTAGGGT  
TGAGTATATATACTTAAGAGTTAAGAATATATATATACAATATATAATAAATATAGTAATATATTA  
ATGGTATGGACTTAACCAGGTTTATATATTATCATTGATAAACATTAATTATAATTTTTCTATTTA  
TTATTATTATTATACTGTGAGATTAATAATTATTAATAATATAATATTACATAGTACGTGATATTTGG  
GGATTTTATCTTATTAATTGGCAATTAATGATTCTAATCAAATTTTATTCTCTTAGTTTAAATGGTA  
GAACAATGATCTTCTAATTCATTGGTTTTAGTTGATTCTAAAAAGAGATGAGTAAATAATTTTCT  
AGATCAGAAATACTACTTTTAACTACAAAAAGCTTACGCTTTTAAACATTTTTTGATAAATAACA  
ACTATTGTTAATATTTGGCTGTCTATTGGTTTAACTACAATTACAAAATTTTTCAATTTTTATAAT  
ATAAATTTAAATGAGAATATTAATAAAGTCATTCAATTATTAATAAATTAGTGAATTCTACCTTATCGA  
TGCGTCACAACCAAGTAACATTAGTTACTTGTGAAATTTTGGTTCATTATTAGCTGTTTGTAAAT  
AGTACAAATTATTACCGGTATTACATTAGCTATGCATTATAGTCCTAGTGAATGGAAGCTTTTAA  
CTCAATAGAGCATATAATGAGAGATGTTAATAACGGGTGATTAGTTCGTTATCTACATAGTAATA  
CAGCTTCTGCTTTCTTTTCTTAGTGATTTACACATAGGAAGAGGTATATATTACGGATCATATA  
GAGCTCCTCGTACTTTAGTTTGAGCTATTGGTACTGTTATATTAATTAATGATGGCTATCGGTT  
TCCTAGGTTATGTTTTACCTTATGGACAGATGTCATTATGAGGTGCTACAGTTATTACTAATCTTA  
TTAGTGCTATACCTGAATAGGGCAAGATATTGTTGAATTCATTTGAGGTGGTTTTCTGTAAATA  
ATGCCACTTTAAACAGATTTTTTGCAATTACATTTGTATTGCCTTTGTATTAGCTGCTTTAGTTTA  
ATGCACTTAATTGCACTTCATGATACTGCTGGTTCAAGCAATCCTCTTGGTGTTTCAGGTAATTAC  
GATAGAATTACATTTGCTCCATATTTTTATTTAAAGATTTAATTACTATTTTTATATTTATTTTGT  
TTAAGTGCTTTTGTATTCTTTATGCCTAATGTTTTAGGGGATAGTGATAATTATATTATGGCTAATC  
CTATGCAAACCTCCTGCTGCTATTGTACCTGAATGATACTTATTACCTTTCTATGCTATTTTAAGATC

TATACCTAATAAATTATTAGGTGTTATAGCGATGTTTAGTGCTATTTTAGCTATTATGTTATTACCT  
GTTACAGATTTAGGTAGATCTAGAGGTTTACAATTTAGACCATTTAGTAAAATAGCTTTCTGAGTT  
TTTGTTGCTAATTTCTTAGTTTTAATGCAATTAGGTGCTAAACACGTTGAAGATCCATTTATATTAT  
TAGGTCAATTAAGTACTGTATTATACTTTAGTTATTTTGTGCTATATTACCTTTAGCTAGTTACTT  
AGATAATAGTTTAACTGATTTATCTAATAAATCTGAATTATTTTAAATAAACTAACTAAATATAT  
TAAGATTATTATTTAATATATTTTCTATTTAAGATACTATTAATTTAGTATTTTGGGTTTTAGTTTA  
TAATTTATATTATATTATGCATTACCCTCCACCTTGCTTTGTAGTAAGCTAATCTGTTATTTCTTTA  
GTTTAATGGTAGAACAATGATCTTCTAATTCATTGGTTTTAGTTCGAATCTAAAAAGGAAATAAG  
AAATATATTCTTATTATTACTTATATAATAATTATTTCTTAAAAATATACATTTTGCATTATAGCCGT  
TTAGCTGTATTTAAATGTAAATGATATAAAATAGAATAAATATTTAAATTATTCCTATGTTATATT  
ATCCTATATTGCAACCATTATCAGAAGTTGTATTAATACTTGTACCTGCCTTATTAGCTGTAGCTT  
ATGTTACAGTTGCTGAAAGAAAACTATGGCTAGTATGCAAAGAAGATTAGGTCCTAATGCTGT  
AGGTTACTATGGACTATTGCAAGCATTGCTGATGCCTTAAACTTTTTATTAAAGAATATGTAG  
CTCCTACACAATCTAATATTGTTCTTTTCTTTTAGGTCCTGTAATAACTTTAATTTTTGCATTATTA  
GGTTACGCTGTTATACCCTATGGTCCTGGTTCAGGGATAAGCGACATGAATTTAGGTATATTTTA  
CATGTTAGCTGTGTCATCTTTAGCTACATACGGTATTCTATTAGCTGGTTGAAGTGCGAATAGTA  
AATACGCTTTTCTAGGTTCTCTTAGAAGTACAGCTCAATTAATTAGTTATGAATTAATTAAGTT  
CAGCTATATTAATAGTAATTATGATAACAGGAAATTTAAATTTAACTGTTTGTACTGAATCTCAAA  
GAGCTATTTGATTTATACTACCTTTATTTCTGTGTTTATAATATTTTTCATAGGATCTATAGCTGA  
GACAAATAGAGCTCCTTTTGATTTAGCCGAGGCTAACCTGCTAATCTGGTTTGGTCTGGTTATAT  
GTCACAAATTGCTAGGAAACCTTTTTATTTAAAAACAAAAGACAATTAGCAGGAACTTAATTT  
AACCTAATTAATAATATTAGATAATTAACCTCTTCATAGACTAAACGTGACAATTTAATATATATA  
TATATTTATTTATATATATGATTAAATAAGATATAGTCAATCATCGGTGTGAATCGACTTAAAAAA  
AAAAGCACATGGGTAAACCCATCTCCCCTTATTAGGGGAATCAGAACTTGTTAGTGGGTTTCAT  
GACAGAGCATGCTGCCGTAGTTTTCGTATTCTTCTTTTAGCTGAGTACGGTAGTATTGTACTAAT  
GTGTATTTTAACTAGTATATTATTTATTGGTGGTTACTTATTATTTGAAATATCCTATGTTTTACTG  
TGGTAAATTATATTTTCTTTGAATTATTCTTTATAGACTGAGTAACATTTGTAGAGGTACAATCTTT  
ATACACTGATTTTTTAAATAATTCTATCATTGAAGGATTATTATATGGGTTTAACTAGGATTAAA  
AAGTTCTTTAATGATATTCACATTTATTTGAGCTAGAGCATCCTTCCCTAGAATACGATTTGATCA  
ACTAATGGGCTTCTGTTGAACAGTTTTATTACCTATTAATTTGCAATTATTATATTAGTACCTTGT  
GTTTTATATAGTTTTAACTTATTACCTGTAAATATACCATTGTTCTAGCTCACACACCCGCCGCC  
CTACTGCCACAAGGCTACAGTACATATGAGGAGGGGAATAAGATCTAGAACTATCCTAGTTA  
ATAATTACACTTAATAGTATACTAAATAGACCATCTATCACTCGAGAATAGTGATAGTGTAAT  
TATACACTATTTTAACTGTATTCTACACTATTAGCATATTATTATCTTTATATGATAATAATTTTATA  
ACTTAATTTATTAGGTTACATTAACAAAAAATTCGTTAACTTTTTTCACCACTTTTAAATACAAAAAT  
ACGAATTTTA

>F-1

ATAACAATTCTAAAGAACATAAAGAGTTATTAGATAAAAAATAATTCACCTATACAGTTAATAAAT  
CAACTTAAAGGGTATTTTTTCATAAATCCTTTATTAGCTTTAAGTTTAGCTATTACTATTTTCTCTTT  
TGCAGGTATTCCTCCTCTGTAGGGTTCTTTGCTAAACAGATGGTATTAAGCGCGGCTATTGATC  
AAGGTTATATCTTTTATCTTTAGTTGCAATATTAAGTGTATAGGAGGGGTTTATTATTTAAA  
TATAATTAAGAAATGTTCTTTTATTCACCTGACTATAAATTAACGAAGAAATTAATAAATAC  
TATTAATGGTCAAATTATTAATAGAAACAATAAAATATTAATGTTGAATTTAATTATACAAATGT  
AGTTATGTCTAGTTCTGTGGCAATAACTATTTCTACTATTACATTAGTAGTTTTATTATTCATGTTT

ATGAATAAAGAATGATTAAGTCTGGGTACTATATTGGTACAATCTTTATTTAGCTATTAATGAGTA  
GTATGACATTATTTATAGGGTTTGTATCTGTTATAGCTATTTTATTTTATAGCCATTAATTTTATATTT  
GCTCCTCATAATCCTTATCAAGAAAAATATAGTATTTTCGAGTGTGGTTTCCATAGTTTTTATAGG  
CAAAATAGAACACAATTCGGTATAAAATTCCTTATTTTTCGCTTTAGTTTATTTACTTTTATAGATTTAG  
AAATATTATTAACCTTTCCCTTTTCGCTCTTAGTGAGTATGTTAATGGTATTTATGGTCTTTTATAGTTAC  
TTTAATTTTATAGCTATAATAACTATAGGATTTATATTTGAATTAGGTAAAAGCGCTCTTAAAATA  
GACAGCAGACAAAAATTATATATACCTAAATTGAACGTTAATTACCATACAGAGTATGTTGGAAT  
AGGTAAGGTTTCTAAGTAAAGTTATAGAGGCAGAAAACCAAAAAACCTACCAAAGGGTAGCTA  
ATGGGAAGCTATTAATAAATAAAGATGATAACCTATATATAGTATAGTTACTATATATTTACTATA  
ACTAGGATTATTATATATATATATATTATCTTATTGTATATTAAGATTATTATTATTATAAGGTATA  
ATTAATATAGTATCTTATTGTATAAGAATATAATATATTAACCTATAATTAATTTTATTTTAAATTT  
TTAATTATAATTTTTTTTTTATATCTAGATGCTTACACATCTACAGATGTAGAAGAGAACAAAATAT  
TGTTGTTATAGTAGTGGATGATATAGAAAAATATTTTATATTATTTATTTTGTAGGTAGCTTTT  
GAAGTGTGATAGAGAGGATATATGGACGGTAGGAGGGTATTCATTTTAATGAACAGTGGATA  
GTTTAAATTAACCTAGTTATAGTTTATGAATTTAAATTATAATTATATTAATGTAGGTATGATAGA  
ATTATGTATTGATCCTTAAGAGTTAAGAGAGATACGCCACGTATAATACATATTGGTTTAGGGT  
TGAGTATATATACTTAAGAGTTAAGAATATATATATACAATATATAATAAATATAGTAATATATTA  
ATGGTATGGACTTAACCAGGTTTATATATTATCATTTGATAAACATTAATTATAATTTTCTATTTA  
TTATTATTATTACTGTGAGATTAATAATTATTAATAATATAATTACATAGTACGTGATATTTGG  
GGATTTTATCTTATTAATTGGCAATTAATGATTCTAATCAAATTTTATTCTCTTTAGTTTAAATGGTA  
GAACAATGATCTTCTAATTCATTGGTTTTAGTTTCGATTCTAAAAAGAGATGAGTAAATAATTTTCT  
AGATCAGAAATACTACTTTTAACTACAAAAAGCTTACGCTTTTAAACATTTTTTGTAAATAACA  
ACTATTGTTAATATTTGGCTGTCTATTGGTTTAACTACAATTACAAAATTTTTCAATTTTATAAT  
ATAAATTTAAATGAGAATATTAATAAAGTCATTCAATTATTAATAATTAGTGAATTCCTACCTTATCGA  
TGCGTCACAACCAAGTAACATTAGTTACTTGTGAAATTTTGGTTCATTATTAGCTGTTTGTTAAT  
AGTACAAATTATTACCGGTATTACATTAGCTATGCATTATAGTCCTAGTGTAATGGAAGCTTTTAA  
CTCAATAGAGCATATAATGAGAGATGTTAATAACGGGTGATTAGTTCGTTATCTACATAGTAATA  
CAGCTTCTGCTTTCTTTTCTTAGTGATTACACATAGGAAGAGGTATATATTACGGATCATATA  
GAGCTCCTCGTACTTTAGTTTGAGCTATTGGTACTGTTATATTAATTAATGATGGCTATCGGT  
TCCTAGGTATGTTTTACCTTATGGACAGATGTCATTATGAGGTGCTACAGTTATTACTAATCTTA  
TTAGTGCTATACCTGAATAGGGCAAGATATTGTTGAATTCATTTGAGGTGGTTTTCTGTAAATA  
ATGCCACTTTAAACAGATTTTTGCATTACATTTGTATTGCCTTTGTATTAGCTGCTTTAGTTTAA  
ATGCACTTAATTGCACTTCATGATACTGCTGGTTCAAGCAATCCTCTTGGTGTTTCAGGTAATTAC  
GATAGAATTACATTTGCTCCATATTTTTATTTAAAGATTTAATTACTATTTTATATTTATTTTGT  
TTAAGTGCTTTTGATTCTTTATGCCTAATGTTTTAGGGGATAGTGATAATTATATTATGGCTAATC  
CTATGCAAACCTGCTGCTATTGTACCTGAATGATACTTATTACCTTCTATGCTATTTTAAAGATC  
TATACCTAATAAATTATTAGGTGTTATAGCGATGTTTAGTGCTATTTTAGCTATTATGTTATTACCT  
GTTACAGATTTAGGTAGATCTAGAGGTTTACAATTTAGACCATTTAGTAAATAGCTTTCTGAGTT  
TTTGTTGCTAATTTCTTAGTTTTAATGCAATTAGGTGCTAAACACGTTGAAGATCCATTTATATTAT  
TAGGTCAATTAAGTACTGTATTATACTTTAGTTATTTTGTGCTATATTACCTTTAGCTAGTTACTT  
AGATAATAGTTTAACTGATTTATCTAATAAATCTGAATTATTTTAAATAAACTAACTAAATATAT  
TAAGATTATTATTTAATATATTTTCTATTTAAGATACTATTAATTTAGTATTTTGGGTTTTAGTTTA  
TAATTTATATTATATTATGCATTACCTCCACCTTGCTTTGTAGTAAGCTAATCTGTTATTTCTTTA  
GTTAATGGTAGAACAATGATCTTCTAATTCATTGGTTTTAGTTTGAATCTAAAAAGGAAATAAG

AAATATATTCTTATTATTACTTATATAATAATTATTTCTTAAAAATATACATTTTGCATTATAGCCGT  
TTAGCTGTATTAAAATGTAAAATGATATAAAATAGAATAAATATTTAAATTATTCCTATGTTATATT  
ATCCTATATTGCAACCATTATCAGAAGTTGTATTAATACTTGTACCTGCCTTATTAGCTGTAGCTT  
ATGTTACAGTTGCTGAAAGAAAACTATGGCTAGTATGCAAAGAAGATTAGGTCCTAATGCTGT  
AGGTTACTATGGACTATTGCAAGCATTTGCTGATGCCTTAAAACTTTTATTAAGAATATGTAG  
CTCCTACACAATCTAATATTGTTCTTTTCTTTTAGGTCCTGTAATAACTTTAATTTTGCATTATTA  
GGTTACGCTGTTATACCCTATGGTCCTGGTTCAGGGATAAGCGACATGAATTTAGGTATATTTTA  
CATGTTAGCTGTGTCATCTTTAGCTACATACGGTATTCTATTAGCTGGTTGAAGTGCGAATAGTA  
AATACGCTTTTCTAGGTTCTCTTAGAAGTACAGCTCAATTAATTAGTTATGAATTAATATTAAGTT  
CAGCTATATTAATAGTAATTATGATAACAGGAAATTTAAATTTAACTGTTTGTACTGAATCTCAAA  
GAGCTATTTGATTTATACTACCTTTATTTCTGTGTTTATAATATTTTTCATAGGATCTATAGCTGA  
GACAAATAGAGCTCCTTTTGATTTAGCCGAGGCTAACCTGCTAATCTGGTTTGGTCTGGTTATAT  
GTCACAAATTGCTAGGAAACCTTTTTATTTAAAAACAAAAGACAATTAGCAGGAAACTTAATTT  
AACCTAATTAATAATTAGATAATTAACCTCTTCATAGACTAAACGTGACAATTTAATATATATA  
TATATTTATTTATATATATGATTAATAAGATATAGTCAATCATCGGTGTGAATCGACTTAAAAAA  
AAAAGCACATGGGTAAACCCATCTCCCTTATTAGGGGAATCAGAACTTGTTAGTGGGTTTCAT  
GACAGAGCATGCTGCCGTAGTTTTCGTATTCTTCTTTTAGCTGAGTACGGTAGTATTGTACTAAT  
GTGTATTTTAACTAGTATATTATTTATTGGTGGTTACTTATTATTTGAAATATCCTATGTTTTACTG  
TGGTAAATTATATTTTCTTTGAATTATTCTTTATAGACTGAGTAACATTTGTAGAGGTACAATCTTT  
ATACACTGATTTTTTAAATAATTCTATCATTGAAGGATTATTATATGGGTTAATCTAGGATTA  
AAGTTCTTTAATGATATTCACATTTATTTGAGCTAGAGCATCCTTCCCTAGAATACGATTTGATCA  
ACTAATGGGCTTCTGTTGAACAGTTTTATTACCTATTAATTTTGCAATTATTATATTAGTACCTTGT  
GTTTTATATAGTTTTAACTTATTACCTGTAAATATACCATTGTTCTAGCTCACACACCCGCCGCC  
CTACTGCCACAAGGCTACAGTACATATGAGGAGGGGAATAAGATCTAGAATACTATCCTAGTTA  
ATAATTACACTTAATAGTATACTAAATAGACCATCTATCATACTCGAGAATAGTGATAGTGTAAT  
TATACACTATTTTAACTGTATTCTACACTATTAGCATATTATTATCTTTATATGATAATAATTTTATA  
ACTTAATTTATTAGGTTACATTAACAAAAAATTCGTTAACTTTTTTCACCACTTTTAAACAAAAT  
ACGAATTTTA

>F-2

ATAACAATTCTAAAGAACATAAAGAGTTATTAGATAAAAAATAATTCACCTATACAGTTAATAAAT  
CAACTTAAAGGGTATTTTTTCATAAATCCTTATTAGCTTTAAGTTTAGCTATTACTATTTTCTCTTT  
TGCAGGTATTCTCCTCTTGTAGGGTCTTTGCTAAACAGATGGTATTAAGCGCGGCTATTGATC  
AAGGTTATATCTTTTATCTTTAGTTGCAATATTAAGTGTATAGGAGGGGTTTATTATTTAAA  
TATAATTAAGAAATGTTCTTTTATTCACCTGACTATAAATTAACGAAGAAATTAATAATAC  
TATTAATGGTCAAATTATTAATAGAAACAATAAAATATTAATGTTGAATTTAATTATACAAATGT  
AGTTATGTCTAGTTCTGTGGCAATAACTATTTCTACTATTACATTAGTAGTTTTATTATTCATGTTT  
ATGAATAAAGAATGATTAAGTCTGGGTACTATATTGGTACAATCTTTATTTAGCTATTAATGAGTA  
GTATGACATTATTTATAGGGTTGTATCTGTTATAGCTATTTTATTTTAGCCATTAATTTATATTT  
GCTCCTCATAATCCTTATCAAGAAAAATATAGTATTTTCGAGTGTGGTTCCATAGTTTTTTAGGG  
CAAAATAGAACACAATTCGGTATAAAATCTTTATTTTGCTTTAGTTTATTTACTTTTAGATTTAG  
AAATATTATTAACTTTCCCTTCGCTCTTAGTGAGTATGTTAATGGTATTTATGGTCTTTTAGTTAC  
TTTAATTTTATAGCTATAATAACTATAGGATTTATATTTGAATTAGGTAAAAGCGCTCTTAAATA  
GACAGCAGACAAAATTATATATACCTAAATTGAACGTTAATTACCATACAGAGTATGTTGGAAT  
AGGTAAGGTTTCTAAGTAAAGTTATAGAGGCAGAAAACCAAAAAACCTACCAAGGGTAGCTA

ATGGGAAGCTATTA AAAAATAAAAGATGATAACCTATATATAGTATAGTTACTATATATTTACTATA  
ACTAGGATTATTATATATATATATATTATCTTATTGTATATTAAGATTATTATTATAAGGTATA  
ATTAATATAGTATCTTATTGTATAAGAATATAATATATTAACCTATAATTAATTTTATTTTTAATTT  
TTAATTATAATTTTTTTTTATATCTAGATGCTTACACATCTACAGATGTAGAAGAGAACAAAATAT  
TGTTGTTATAGTAGTGGATGATATAGAAAAATATTTTTATATTATTTATTTTTGTTAGGTAGCTTTT  
GAAGTGTGGATAGAGAGGATATATGGACGGTAGGAGGGTATTCATTTTAATGAACAGTGGATA  
GTTTAAATTAACCTAGTTATAGTTTATGAATTTAAATTATAATTATATTAATGTAGGTTATGATAGA  
ATTATGTATTGATCCTTAAGAGTTAAGAGAGATACGCCACGTATAATACATATTGGTTTAGGGT  
TGAGTATATATACTTAAGAGTTAAGAATATATATATACAATATATAATAAATATAGTAATATATTA  
ATGGTATGGACTTAACCGGTTTATATATTATCATTTGATAAACATTAATTATAATTTTTCTATTTA  
TTATTATTATTACTGTGAGATTAATAATTATTA AAAATATAATATTACATAGTACGTGATATTTGG  
GGATTTTATCTTATTAATTGGCAATTAATGATTCTAATCAAATTTTATTCTCTTTAGTTTAATGGTA  
GAACAATGATCTTCTAATTCATTGGTTTTAGTTTCGATTCTAAAAAGAGATGAGTAAATAATTTTCT  
AGATCAGAAATACTACTTTTAACTACAAAAAGCTTACGCTTTTAAACATTTTTTTGATAAATAACA  
ACTATTGTTAATATTTGGCTGTCTATTGGTTTAACTAACAATTACAAAATTTTTCAATTTTTATAAT  
ATAAATTTAAATGAGAATATTA AAAAGTCATTCATTATTA AAATTAGTGAATTCCTACCTTATCGA  
TGCGTCACAACCAAGTAACATTAGTTACTTGTGAAATTTTGGTTCATTATTAGCTGTTTGTTAAT  
AGTACAAATTATTACCGGTATTACATTAGCTATGCATTATAGTCCTAGTGAATGGAAGCTTTTAA  
CTCAATAGAGCATATAATGAGAGATGTTAATAACGGGTGATTAGTTCGTTATCTACATAGTAATA  
CAGCTTCTGCTTTCTTTTTCTTAGTGTATTTACACATAGGAAGAGGTATATATTACGGATCATATA  
GAGCTCCTCGTACTTTAGTTTGAGCTATTGGTACTGTTATATTAATTAATGATGGCTATCGGTT  
TCCTAGGTTATGTTTTACCTTATGGACAGATGTCATTATGAGGTGCTACAGTTATTACTAATCTTA  
TTAGTGCTATACCTGAATAGGGCAAGATATTGTTGAATTCATTTGAGGTGGTTTTCTGTTAATA  
ATGCCACTTTAAACAGATTTTTTGCAATTACATTTGTATTGCCTTTTGTATTAGCTGCTTTAGTTTA  
ATGCACTTAATTGCACTTCATGATACTGCTGGTTCAAGCAATCCTCTGGTGTTTCAGGTAATTAC  
GATAGAATTACATTTGCTCCATATTTTTATTTAAAGATTTAATTACTATTTTTATATTTATTTTGTA  
TTAAGTGCTTTTGTATTCTTTATGCCTAATGTTTTAGGGGATAGTGATAATTATATTATGGCTAATC  
CTATGCCAACTCCTGCTGCTATTGTACCTGAATGATACTTATTACCTTTCTATGCTATTTTAAGATC  
TATACCTAATAAATTATTAGGTGTTATAGCGATGTTTAGTGCTATTTTAGCTATTATGTTATTACCT  
GTTACAGATTTAGGTAGATCTAGAGGTTTACAATTTAGACCATTTAGTAAATAGCTTTCTGAGTT  
TTTGTTGCTAATTTCTTAGTTTAAATGCAATTAGGTGCTAAACACGTTGAAGATCCATTTATATTAT  
TAGGTCAATTAAGTACTGTATTATACTTTAGTTATTTTGTTGCTATATTACCTTTAGCTAGTTACTT  
AGATAATAGTTTAACTGATTTATCTAATAAATCTGAATTATTTTAAATAAACTAACTAAATATAT  
TAAGATTATTATTTAATATATTTTCTATTTAAGATACTATTAATTTAGTATTTTGGGTTTTCAGTTTA  
TAATTTATATTATATTATGCATTACCCTCCACCTTGCTTTGTAGTAAGCTAATCTGTTATTTCTTTA  
GTTAATGGTAGAACAATGATCTTCTAATTCATTGGTTTTAGTTTGAATCTAAAAAGGAAATAAG  
AAATATATTCTTATTATTACTTATATAATAATTATTTCTTAAAAATATACATTTTGCATTATAGCCGT  
TTAGCTGTATTAAATGTAAATGATATAAAATAGAATAAATATTTAAATTATTCCTATGTTATATT  
ATCCTATATTGCAACCATTATCAGAAGTTGTATTAATACTTGTACCTGCCTTATTAGCTGTAGCTT  
ATGTTACAGTTGCTGAAAGAAAACTATGGCTAGTATGCAAAGAAGATTAGGTCCTAATGCTGT  
AGGTTACTATGGACTATTGCAAGCATTTGCTGATGCCTTAAACTTTTATTAAGAATATGTAG  
CTCCTACACAATCTAATATTGTTCTTTTCTTTTAGGTCCTGTAATAACTTTAATTTTTGCATTATTA  
GGTTACGCTGTTATACCCTATGGTCCTGGTTCAGGGATAAGCGACATGAATTTAGGTATATTTTA  
CATGTTAGCTGTGTCATCTTTAGCTACATACGGTATTCTATTAGCTGGTTGAAGTGCGAATAGTA

AATACGCTTTTCTAGGTTCTCTTAGAAGTACAGCTCAATTAATTAGTTATGAATTAATATTAAGTT  
CAGCTATATTAATAGTAATTATGATAACAGGAAATTTAAATTTAACTGTTTGTACTGAATCTCAAA  
GAGCTATTTGATTTATACTACCTTTATTTCCCTGTGTTTATAATATTTTTCATAGGATCTATAGCTGA  
GACAAATAGAGCTCCTTTTGATTTAGCCGAGGCTAACCTGCTAATCTGGTTTGGTCTGGTTATAT  
GTCACAAATTGCTAGGAAACCTTTTTATTTTAAAAACAAAAGACAATTAGCAGGAACTTAATTT  
AACCTAATTAATAATATTAGATAATTAACTCTTCATAGACTAAACGTGACAATTTAATATATATA  
TATATTTATTTATATATATGATTAAATAAGATATAGTCAATCATCGGTGTGAATCGACTTAAAAAA  
AAAAGCACATGGGTAAACCCATCTCCCCTTATTAGGGGAATCAGAACTTGTTAGTGGGTTTCAT  
GACAGAGCATGCTGCCGTAGTTTTCGTATTCTTCTTTTGTAGCTGAGTACGGTAGTATTGTACTAAT  
GTGTATTTTAACTAGTATATTATTTATTGGTGGTTACTTATTATTTGAAATATCCTATGTTTTTACTG  
TGGTAAATTATATTTTCTTTGAATTATTCTTTATAGACTGAGTAACATTTGTAGAGGTACAATCTTT  
ATACACTGATTTTTTAAATAATTCTATCATTGAAGGATTATTATATGGGTTTAACTAGGATTA  
AAGTTCTTTAATGATATTCACATTTATTTGAGCTAGAGCATCCTTCCCTAGAATACGATTTGATCA  
ACTAATGGGCTTCTGTTGAACAGTTTTATTACCTATTAATTTTGAATTATTATATTAGTACCTTGT  
GTTTTATATAGTTTTAACTTATTACCTGTAAATATACCATTGTTCTAGCTCACACACCCGCCGCC  
CTACTGCCACAAGGCTACAGTACATATGAGGAGGGGAACTAAAGATCTAGAATATCCTAGTTA  
ATAATTACACTTAATAGTATACTAAATAGACCATCTATCATACTCGAGAATAGTGATAGTGAAT  
TATACACTATTTTAACTGTATTCTACACTATTAGCATATTATTATCTTTATATGATAATAATTTTATA  
ACTTAATTTATTAGGTTACATTAACAAAAAATTCGTTAACTTTTTTCACCACTTTTTAATACAAAAT  
ACGAATTA

>H-2

ATAACAATTCTAAAGAACATAAAGAGTTATTAGATAAAAAATAATTCACCTATACAGTTAATAAAT  
CAACTTAAAGGTATTTTTTCATAAATCCTTTATTAGCTTTAAGTTTAGCTATTACTATTTTCTCTTT  
TGCAGGTATTCTCCTCTTGTAGGGTCTTTGCTAAACAGATGGTATTAAGCGCGGCTATTGATC  
AAGGTTATATCTTTTATCTTTAGTTGCAATATTAAGTGTATAGGAGGGGTTTATTATTTAAA  
TATAATTAAGAAATGTTCTTTTATTCACCTGACTATAAATTAACGAAGAAATTAATAAATAC  
TATTAATGGTCAAATTATTAATAGAAACAATAAAATATTAATGTTGAATTTAATTATACAAATGT  
AGTTATGTCTAGTTCTGTGGCAATAACTATTTCTACTATTACATTAGTAGTTTTATTATTCATGTTT  
ATGAATAAAGAATGATTAAGTCTGGGTACTATATTGGTACAATCTTTATTTAGCTATTAATGAGTA  
GTATGACATTATTTATAGGGTTGTATCTGTTATAGCTATTTTATTTTGTAGCCATTAATTTATATTT  
GCTCCTCATAATCCTTATCAAGAAAAATATAGTATTTTCGAGTGTGGTTTCCATAGTTTTTTAGGG  
CAAAATAGAACACAATTCGGTATAAAATTCCTTTATTTTGTCTTAGTTTATTTACTTTTAGATTTAG  
AAATATTATTAACTTTCCCTTTCGCTCTTAGTGAGTATGTTAATGGTATTTATGGTCTTTTAGTTAC  
TTTAATTTTTATAGCTATAATAACTATAGGATTTATATTTGAATTAGGTAAAAGCGCTCTTAAATA  
GACAGCAGACAAAAATTATATATACCTAAATTGAACGTTAATTACCATACAGAGTATGTTGGAAT  
AGGTAAGGTTTCTAAGTAAAGTTATAGAGGCAGAAAACCAAAAAACCTACCAAAGGGTAGCTA  
ATGGGAAGCTATTAATAAATAAAGATGATAACCTATATATAGTATAGTTACTATATATTTACTATA  
ACTAGGATTATTATATATATATATATTATCTTATTGTATATTAAGATTATTATTATAAGGTATA  
ATTAATATAGTATCTTATTGTATAAGAATATAATATATTAACCTATAATTAATTTTATTTTTAATTT  
TTAATTATAATTTTTTTTTATATCTAGATGCTTACACATCTACAGATGTAGAAGAGAACAAAATAT  
TGTTGTTATAGTAGTGATATAGAAAAATATTTTTATATTATTTATTTTGTAGGTAGCTTTT  
GAAGTGTTGATAGAGAGGATATATGGACGGTAGGAGGGTATTCATTTAATGAACAGTGGATA  
GTTTAAATTAACCTAGTTATAGTTTATGAATTTAAATTATAATTATTAATGTAGGTTATGATAGA  
ATTATGTATTGATCCTTAAGAGTTAAGAGAGATACGCCACGTATAATACATATTGGTTTAGGGT

TGAGTATATATACTTAAGAGTTAAGAATATATATATACAATATATAATAAATATAGTAATATATTA  
ATGGTATGGACTTAACCAGGTTTATATATTATCATTTGATAAACATTAATTATAATTTTTCTATTTA  
TTATTATTATTACTGTGAGATTAATAATTATTAATAATATTACATAGTACGTGATATTTGG  
GGATTTTATCTTATTAATTGGCAATTAATGATTCTAATCAAATTTTATTCTCTTTAGTTTAAATGGTA  
GAACAATGATCTTCTAATTCATTGGTTTTAGTTGATTCTAAAAAGAGATGAGTAAATAATTTTCT  
AGATCAGAAATACTACTTTTAACTACAAAAAGCTTACGCTTTTTAACATTTTTTGATAAATAACA  
ACTATTGTTAATATTTGGCTGTCTATTGGTTTAACTAACAATTACAAAATTTTTCAATTTTTATAAT  
ATAAATTTAAATGAGAATATTAATAAGTCATTATTATTAATAATTAGTGAATTCTTACCTTATCGA  
TGCGTCACAACCAAGTAACATTAGTTACTTGTGAAATTTTGGTTCATTATTAGCTGTTTGTTAAT  
AGTACAAATTATTACCGGTATTACATTAGCTATGCATTATAGTCCTAGTGAATGGAAGCTTTTAA  
CTCAATAGAGCATATAATGAGAGATGTTAATAACGGGTGATTAGTTCGTTATCTACATAGTAATA  
CAGCTTCTGCTTTCTTTTTCTTAGTGTATTTACACATAGGAAGAGGTATATATTACGGATCATATA  
GAGCTCCTCGTACTTTAGTTTGAGCTATTGGTACTGTTATTAATTAATGATGGCTATCGGTT  
TCCTAGGTTATGTTTTACCTTATGGACAGATGTCATTATGAGGTGCTACAGTTATTACTAATCTTA  
TTAGTGCTATACCTGAATAGGGCAAGATATTGTTGAATTCATTGAGGTGGTTTTCTGTTAATA  
ATGCCACTTTAAACAGATTTTTGCATTACATTTGTATTGCCTTTGTATTAGCTGCTTAGTTTTA  
ATGCACTTAATTGCACTTCATGATACTGCTGGTTCAAGCAATCCTCTTGGTGTTTCAGGTAATTAC  
GATAGAATTACATTTGCTCCATATTTTTATTTAAAGATTTAATTACTATTTTTATTTATTTTTGTA  
TTAAGTGCTTTTGATTCTTTATGCCTAATGTTTTAGGGGATAGTGATAATTATATTATGGCTAATC  
CTATGCCAACTCCTGCTGCTATTGTACCTGAATGATACTTATTACCTTTCTATGCTATTTTAAGATC  
TATACCTAATAAATTATTAGGTGTTATAGCGATGTTTAGTGCTATTTAGCTATTATGTTATTACCT  
GTTACAGATTTAGGTAGATCTAGAGGTTTACAATTTAGACCATTTAGTAAATAGCTTTCTGAGTT  
TTTGTTGCTAATTTCTTAGTTTTAATGCAATTAGGTGCTAAACACGTTGAAGATCCATTATATTAT  
TAGGTCAATTAAGTACTGTATTATACTTTAGTTATTTTTGTTGCTATATTACCTTTAGCTAGTTACTT  
AGATAATAGTTTAACTGATTTATCTAATAAATCTGAATTATTTTAAATAAACTAACTAAATATAT  
TAAGATTATTATTTAATATATTTTCTATTTAAGATACTATTAATTTAGTATTTTGGGTTTTCAGTTTA  
TAATTTATATTATATTATGCATTACCCTCCACCTTGCTTTGTAGTAAGCTAATCTGTTATTTCTTTA  
GTTTAATGGTAGAACAATGATCTTCTAATTCATTGGTTTTAGTTGCAATCTAAAAAGGAAATAAG  
AAATATATTCTTATTATTACTTATATAATAATTATTTCTTAAAAATATACATTTTGCATTATAGCCGT  
TTAGCTGTATTAAATGTAAATGATATAAAATAGAATAAATATTTAAATTATTCCTATGTTATATT  
ATCCTATATTGCAACCATTATCAGAAGTTGATTAATACTTGTACCTGCCTTATTAGCTGTAGCTT  
ATGTTACAGTTGCTGAAAGAAAACTATGGCTAGTATGCAAAGAAGATTAGGTCCTAATGCTGT  
AGGTTACTATGGACTATTGCAAGCATTGCTGATGCCTTAAACTTTTTATTAAGAATATGTAG  
CTCCTACACAATCTAATATTGTTCTTTCTTTTAGGTCCTGTAATAACTTTAATTTTTGCATTATTA  
GGTTACGCTGTTATACCCTATGGTCCTGGTTCAGGGATAAGCGACATGAATTTAGGTATATTTTA  
CATGTTAGCTGTGTCATCTTTAGCTACATACGGTATTCTATTAGCTGGTTGAAGTGCGAATAGTA  
AATACGCTTTTCTAGGTTCTCTTAGAAGTACAGCTCAATTAATTAGTTATGAATTAATTAAGTT  
CAGCTATATTAATAGTAATTATGATAACAGGAAATTTAAATTTAACTGTTTGTACTGAATCTCAAA  
GAGCTATTTGATTTATACTACCTTTATTTCTGTGTTTATAATTTTTTCATAGGATCTATAGCTGA  
GACAAATAGAGCTCCTTTGATTTAGCCGAGGCTAACCTGCTAATCTGGTTTGGTCTGGTTATAT  
GTCACAAATTGCTAGGAAACCTTTTTATTTAAAAACAAAAGACAATTAGCAGGAACTTAATTT  
AACCTAATTAATAATATTAGATAATTAACTCTTCATAGACTAAACGTGACAATTTAATATATATA  
TATATTTATTTATATATATGATTAAATAAGATATAGTCAATCATCGGTGTGAATCGACTTAAAAAA  
AAAAGCACATGGGTAAACCCATCTCCCCTTATTAGGGGAATCAGAACTTGTTAGTGGGTTTAT

GACAGAGCATGCTGCCGTAGTTTTCGTATTCTTCTTTTAGCTGAGTACGGTAGTATTGTACTAAT  
GTGTATTTAACTAGTATATTATTTATTGGTGGTTACTTATTATTTGAAATATCCTATGTTTTACTG  
TGGTAAATTATATTTTCTTTGAATTATTCTTTATAGACTGAGTAACATTTGTAGAGGTACAATCTTT  
ATACACTGATTTTTTAAATAATTCTATCATTGAAGGATTATTATATGGGTTTAATCTAGGATTAAA  
AAGTTCTTTAATGATATTCACATTTATTTGAGCTAGAGCATCCTTCCCTAGAATACGATTTGATCA  
ACTAATGGGCTTCTGTTGAACAGTTTTATTACCTATTAATTTTGCAATTATTATATTAGTACCTTGT  
GTTTTATATAGTTTTAACTTATTACCTGTAAATATACCATTGTTCTAGCTCACACACCCGCCGCC  
CTACTGCCACAAGGCTACAGTACATATGAGGAGGGGAATAAGATCTAGAATACTATCCTAGTTA  
ATAATTACACTTAATAGTATACTAAATAGACCATCTATCATACTCGAGAATAGTGATAGTGTAAT  
TATACACTATTTTAACTGTATTCTACACTATTAGCATATTATTATCTTTATATGATAATAATTTATA  
ACTTAATTTATTAGGTTACATTAACAAAAAATTCGTTAACTTTTTTCACCACTTTTAAATACAAAAT  
ACGAATTTTA

>Hei-1

ATAACAATTCTAAAGAACATAAAGAGTTATTAGATAAAAAATAATTCACCTATACAGTTAATAAAT  
CAACTTAAAGGGTATTTTTTCATAAATCCTTTATTAGCTTTAAGTTTAGCTATTACTATTTTCTCTTT  
TGCAGGTATTCCTCCTCTTGTAGGGTTCTTTGCTAAACAGATGGTATTAAGCGCGGCTATTGATC  
AAGGTTATATCTTTTATCTTTAGTTGCAATATTAAGTGTATAGGAGGGGTTTATTATTTAAA  
TATAATTAAGAAATGTTCTTTTATTCACCTGACTATAAATTAACGAAGAAATTAATAAATAC  
TATTAATGGTCAAATTATTAATAGAAACAATAAAATATTAAATGTTGAATTTAATTATACAAATGT  
AGTTATGTCTAGTTCTGTGGCAATAACTATTTCTACTATTACATTAGTAGTTTTATTATTCATGTTT  
ATGAATAAAGAATGATTAAGTCTGGGTACTATATTGGTACAATCTTTATTTAGCTATTAATGAGTA  
GTATGACATTATTTATAGGGTTTGTATCTGTTATAGCTATTTTATTTTAGCCATTAATTTATATTT  
GCTCCTCATAATCCTTATCAAGAAAAATATAGTATTTTCGAGTGTGGTTTCCATAGTTTTTAGGG  
CAAAATAGAACACAATTCGGTATAAAATCTTTATTTTGTCTTAGTTTATTTACTTTTAGATTTAG  
AAATATTATTAACTTTCCCTTTCGCTCTTAGTGAGTATGTTAATGGTATTTATGGTCTTTTAGTTAC  
TTTAATTTTATAGCTATAATAACTATAGGATTTATATTTGAATTAGGTAAAAGCGCTCTTAAATA  
GACAGCAGACAAAAATTATATATACCTAAATTGAACGTTAATTACCATACAGAGTATGTTGGAAT  
AGGTAAGGTTTCTAAGTAAAGTTATAGAGGCAGAAAACCAAAAAACCTACCAAAGGGTAGCTA  
ATGGGAAGCTATTAATAAATAAAGATGATAACCTATATATAGTATAGTTACTATATATTTACTATA  
ACTAGGATTATTATATATATATATATTATCTTATTGTATATTAAGATTATTATTATAAGGTATA  
ATTAATATAGTATCTTATTGTATAAGAATATAATATATTAACCTATAATTAATTTTATTTTAAATTT  
TTAATTATAATTTTTTTTTATATCTAGATGCTTACACATCTACAGATGTAGAAGAGAACAAAATAT  
TGTTGTTATAGTAGTGGATGATATAGAAAAATATTTTATATTATTTATTTTGTAGGTAGCTTTT  
GAAGTGTGATAGAGAGGATATATGGACGGTAGGAGGGTATTCATTTTAATGAACAGTGGATA  
GTTTAAATTAACCTAGTTATAGTTTATGAATTTAAATTATAATTATATTAATGTAGGTATGATAGA  
ATTATGTATTGATCCTTAAGAGTTAAGAGAGATACGCCACGTATAATACATATTGGTTTAGGGT  
TGAGTATATATACTTAAGAGTTAAGAATATATATATACAATATATAATAAATATAGTAATATATTA  
ATGGTATGGACTTAACCAGGTTTATATATTATCATTTGATAAACATTAATTATAATTTTCTATTTA  
TTATTATTATTACTGTGAGATTAATAATTATTAATAATATTACATAGTACGTGATATTTGG  
GGATTTTATCTTATTAATTGGCAATTAATGATTCTAATCAAATTTTATTCTCTTTAGTTTAAATGGTA  
GAACAATGATCTTCTAATTCATTGGTTTTAGTTTCGATTCTAAAAAGAGATGAGTAAATAATTTTCT  
AGATCAGAAATACTACTTTTAACTACAAAAAGCTTACGCTTTTAAACATTTTTTTGATAAATAACA  
ACTATTGTTAATATTTGGCTGTCTATTGGTTTAACTACAATTACAAAATTTTTCAATTTTATAAT  
ATAAATTTAAATGAGAATATTAATAAAGTCATTCAATTATTAATAATTAGTGAATCTTACCTTATCGA

TGCGTCACAACCAAGTAACATTAGTTACTTGTGAAATTTTGGTTCATTATTAGCTGTTTGTTAAT  
AGTACAAATTATTACCGGTATTACATTAGCTATGCATTATAGTCCTAGTGTAATGGAAGCTTTTAA  
CTCAATAGAGCATATAATGAGAGATGTTAATAACGGGTGATTAGTTCGTTATCTACATAGTAATA  
CAGCTTCTGCTTTCTTTTCTTAGTGATTTACACATAGGAAGAGGTATATATTACGGATCATATA  
GAGCTCCTCGTACTTTAGTTTGAGCTATTGGTACTGTTATATTAATATTAATGATGGCTATCGGT  
TCCTAGGTTATGTTTTACCTTATGGACAGATGTCATTATGAGGTGCTACAGTTACTAATCTTA  
TTAGTGCTATACCTGAATAGGGCAAGATATTGTTGAATTCATTTGAGGTGGTTTTCTGTTAATA  
ATGCCACTTTAAACAGATTTTTGCATTACATTTGTATTGCCTTTGTATTAGCTGCTTAGTTTTA  
ATGCACTTAATTGCACTTCATGATACTGCTGGTTCAAGCAATCCTCTGGTGTTTCAGGTAATTAC  
GATAGAATTACATTTGCTCCATATTTTTATTTAAAGATTTAATTACTATTTTTATATTTATTTTGT  
TTAAGTGCTTTGTATTCTTTATGCCTAATGTTTTAGGGGATAGTGATAATTATATTATGGCTAATC  
CTATGCAAACCTCCTGCTGCTATTGTACCTGAATGATACTTATTACCTTTCTATGCTATTTTAAGATC  
TATACCTAATAAATTATTAGGTGTTATAGCGATGTTTAGTGCTATTTAGCTATTATGTTATTACCT  
GTTACAGATTTAGGTAGATCTAGAGGTTTACAATTTAGACCATTTAGTAAATAGCTTTCTGAGTT  
TTTGTTGCTAATTTCTTAGTTTTAATGCAATTAGGTGCTAAACACGTTGAAGATCCATTTATATTAT  
TAGGTCAATTAAGTACTGTATTATACTTTAGTTATTTTGTTGCTATATTACCTTTAGCTAGTTACTT  
AGATAATAGTTTAACTGATTTATCTAATAAATCTGAATTATTTTAAATAAAACTAACTAAATATAT  
TAAGATTATTATTTAATATATTTTCTATTTAAGATACTATTAATTTAGTATTTTGGGTTTTAGTTTA  
TAATTTATATTATATTATGCATTACCCTCCACCTTGCTTTGTAGTAAGCTAATCTGTTATTTCTTTA  
GTTTAATGGTAGAACAATGATCTTCTAATTCATTGGTTTTAGTTTGAATCTAAAAAGGAAATAAG  
AAATATATTCTTATTATTACTTATATAATAATTATTTCTTAAAAATATACATTTTGCAATTATAGCCGT  
TTAGCTGTATTAAATGTAAATGATATAAAATAGAATAAATATTTAAATTATTCCTATGTTATATT  
ATCCTATATTGCAACCATTATCAGAAGTTGTATTAATACTTGTACCTGCCTTATTAGCTGTAGCTT  
ATGTTACAGTTGCTGAAAGAAAACTATGGCTAGTATGCAAAGAAGATTAGGTCCTAATGCTGT  
AGGTTACTATGGACTATTGCAAGCATTGCTGATGCCTTAAACTTTTTATTTAAAGAATATGTAG  
CTCCTACACAATCTAATATTGTTCTTTTCTTTTAGGTCTGTAAATAACTTTAATTTTGCAATTATTA  
GGTTACGCTGTTATACCCTATGGTCCTGGTTCAGGGATAAGCGACATGAATTTAGGTATATTTTA  
CATGTTAGCTGTGTCATCTTTAGCTACATACGGTATTCTATTAGCTGGTTGAAGTGCGAATAGTA  
AATACGCTTTTCTAGGTTCTCTTAGAAGTACAGCTCAATTAATTAGTTATGAATTAATATTAAGTT  
CAGCTATATTAATAGTAATTATGATAACAGGAAATTTAAATTTAACTGTTTGACTGAATCTCAAA  
GAGCTATTTGATTTATACTACCTTTATTTCTGTGTTTATAATATTTTTCATAGGATCTATAGCTGA  
GACAAATAGAGCTCCTTTGATTTAGCCGAGGCTAACCTGCTAATCTGGTTTGGTCTGGTTATAT  
GTCACAAATTGCTAGGAAACCTTTTTATTTAAAAACAAAAGACAATTAGCAGGAAACTTAATTT  
AACCTAATTAATAAATTATTAGATAAATAAATCTTTCATAGACTAAACGTGACAATTTAATATATATA  
TATATTTATTTATATATATGATTAATAAGATATAGTCAATCATCGGTGTGAATCGACTTAAAAAA  
AAAAGCACATGGGTAAACCCATCTCCCCTTATTAGGGGAATCAGAACTTGTTAGTGGGTTTCAT  
GACAGAGCATGCTGCCGTAGTTTTCTGATTCTTCTTTTAGCTGAGTACGGTAGTATTGTACTAAT  
GTGTATTTTAACTAGTATATTATTTATTGGTGGTTACTTATTATTTGAAATATCCTATGTTTTACTG  
TGGTAAATTATATTTTCTTTGAATTATCTTTATAGACTGAGTAACATTTGTAGAGGTACAATCTTT  
ATACACTGATTTTTTAAATAATTCTATCATTGAAGGATTATTATATGGGTTAATCTAGGATTAAA  
AAGTTCTTTAATGATATTCACATTTATTTGAGCTAGAGCATCCTTCCCTAGAATACGATTTGATCA  
ACTAATGGGCTTCTGTTGAACAGTTTTATTACCTATTAATTTTGCAATTATTATATTAGTACCTTGT  
GTTTTATATAGTTTTAACTTATTACCTGTAAATATACCATTGTTCTAGCTCACACACCCGCCGCC  
CTACTGCCACAAGGCTACAGTACATATGAGGAGGGGAAGTAAAGATCTAGAAGTATCCTAGTTA

ATAATTACACTTAATAGTATACTAAATAGACCATCTATCATACTCGAGAATAGTGATAGTGTAAT  
TATACACTATTTTAACTGTATTCTACACTATTAGCATATTATTATCTTTATATGATAATAATTTTATA  
ACTTAATTTATTAGGTTACATTAACAAAAAATTCGTTAACTTTTTTCACCACTTTTAAATACAAAAT  
ACGAATTTTA

>Hei-3

ATAACAATTCTAAAGAACATAAAGAGTTATTAGATAAAAAATAATTCACCTATACAGTTAATAAAT  
CAACTTAAAGGGTATTTTTTCATAAATCCTTTATTAGCTTTAAGTTTAGCTATTACTATTTTCTCTTT  
TGCAGGTATTCCTCCTCTGTAGGGTTCTTTGCTAAACAGATGGTATTAAGCGCGGCTATTGATC  
AAGGTTATATCTTTTTATCTTTAGTTGCAATATTAAGTGTATAGGAGGGGTTTATTATTTAAA  
TATAATTAAGAAATGTTCTTTTATTCACCTGACTATAAATTAACGAAGAAATTAATAAATAC  
TATTAATGGTCAAATTATTAATAGAAACAATAAATATTAATGTTGAATTTAATTATACAAATGT  
AGTTATGTCTAGTTCTGTGGCAATAACTATTTCTACTATTACATTAGTAGTTTTATTATTCATGTTT  
ATGAATAAAGAATGATTAAGTCTGGGTACTATATTGGTACAATCTTTATTTAGCTATTAATGAGTA  
GTATGACATTATTTATAGGGTTTGTATCTGTTATAGCTATTTTATTTTAGCCATTAATTTTATATTT  
GCTCCTCATAATCCTTATCAAGAAAAATATAGTATTTTCGAGTGTGGTTTCCATAGTTTTTTAGGG  
CAAAATAGAACACAATTCGGTATAAAATCCTTATTTTGTCTTAGTTTATTTACTTTTAGATTTAG  
AAATATTATTAACTTTCCCTTTCGCTCTTAGTGAGTATGTTAATGGTATTTATGGTCTTTTAGTTAC  
TTTAATTTTATAGCTATAATAACTATAGGATTTATATTTGAATTAGGTAAAAGCGCTCTTAAATA  
GACAGCAGACAAAAATTATATATACCTAAATTGAACGTTAATTACCATACAGAGTATGTTGGAAT  
AGGTAAGGTTTCTAAGTAAAGTTATAGAGGCAGAAAACCAAAAAACCTACCAAAGGGTAGCTA  
ATGGGAAGCTATTAATAAAGATGATAACCTATATATAGTATAGTTACTATATATTTACTATA  
ACTAGGATTATTATATATATATATTATCTTATTGTATATTAAGATTATTATTATTATAAGGTATA  
ATTAATATAGTATCTTATTGTATAAGAATATAATATATTAACCTATAATTAATTTTATTTTAAATTT  
TTAATTATAATTTTTTTTTATATCTAGATGCTTACACATCTACAGATGTAGAAGAGAACAAAATAT  
TGTTGTTATAGTAGTGGATGATATAGAAAAATATTTTTATATTATTTATTTTGTAGGTAGCTTTT  
GAAGTGTTTGATAGAGAGGATATATGGACGGTAGGAGGGTATTCATTTTAATGAACAGTGGATA  
GTTTAAATTAACCTAGTTATAGTTTATGAATTTAAATTATAATTATATTAATGTAGGTTATGATAGA  
ATTATGTATTGATCCTTAAGAGTTAAGAGAGATACGCCACGTATAATACATATTGGTTTAGGGT  
TGAGTATATATACTTAAGAGTTAAGAATATATATATACAATATATAATAAATATAGTAATATATTA  
ATGGTATGGACTTAACCAGGTTTATATATTATCATTGATAAACATTAATTATAATTTTCTATTTA  
TTATTATTATTACTGTGAGATTAATAATTATTAATAATATTACATAGTACGTGATATTTGG  
GGATTTTATCTTATTAATTGGCAATTAATGATTCTAATCAAATTTTATTCTCTTTAGTTTAAATGGTA  
GAACAATGATCTTCTAATTCATTGGTTTTAGTTTCGATTCTAAAAAGAGATGAGTAAATAATTTTCT  
AGATCAGAAATACTACTTTTAACTACAAAAAGCTTACGCTTTTAAACATTTTTTTGATAAATAACA  
ACTATTGTTAATATTTGGCTGTCTATTGGTTTAACTAACAATTACAAAATTTTTCAATTTTTATAAT  
ATAAATTTAAATGAGAATATTAAAAAGTCATTATTAAAAATTAGTGAATTCTTACCTTATCGA  
TGCCTCACAACCAAGTAACATTAGTTACTTGTGAAATTTTGGTTCATTATTAGCTGTTTGTAAAT  
AGTACAAATTATTACCGGTATTACATTAGCTATGCATTATAGTCCTAGTGAATGGAAGCTTTTAA  
CTCAATAGAGCATATAATGAGAGATGTTAATAACGGGTGATTAGTTCGTTATCTACATAGTAATA  
CAGCTTCTGCTTTCTTTTCTTAGTGTTTACACATAGGAAGAGGTATATATTACGGATCATATA  
GAGCTCCTCGTACTTTAGTTTGAGCTATTGGTACTGTTATATTAATTAATGATGGCTATCGGTT  
TCCTAGGTTATGTTTTACCTTATGGACAGATGTCATTATGAGGTGCTACAGTTATTACTAATCTTA  
TTAGTGCTATACCTGAATAGGGCAAGATATTGTTGAATTCATTTGAGGTGGTTTTCTGTAAATA  
ATGCCACTTAAACAGATTTTTTGCATTACATTTGTATTGCCTTTGTATTAGCTGCTTTAGTTTAA

ATGCACTTAATTGCACTTCATGATACTGCTGGTTCAAGCAATCCTCTTGGTGTTTCAGGTAATTAC  
GATAGAATTACATTTGCTCCATATTTTTATTTAAAGATTTAATTACTATTTTTATATTTATTTTTGTA  
TTAAGTGCTTTTGATTCTTTATGCCTAATGTTTTAGGGGATAGTGATAATTATATTATGGCTAATC  
CTATGCAAACCTCCTGCTGCTATTGTACCTGAATGATACTTATTACCTTTCTATGCTATTTTAAGATC  
TATACCTAATAAATTATTAGGTGTTATAGCGATGTTTAGTGCTATTTTAGCTATTATGTTATTACCT  
GTTACAGATTTAGGTAGATCTAGAGGTTTACAATTTAGACCATTTAGTAAAATAGCTTTCTGAGTT  
TTTGTTGCTAATTTCTTAGTTTTAATGCAATTAGGTGCTAAACACGTTGAAGATCCATTTATATTAT  
TAGGTCAATTAAGTACTGTATTATACTTTAGTTATTTTTGTTGCTATATTACCTTTAGCTAGTACTT  
AGATAATAGTTTAACTGATTTATCTAATAAATCTGAATTATTTTTAAATAAACTAACTAAATATAT  
TAAGATTATTATTTAATATATTTTCTATTTAAGATACTATTAATTTAGTATTTTGGGTTTTTCAGTTTA  
TAATTTATATTATATTATGCATTACCCTCCACCTTGCTTTGTAGTAAGCTAATCTGTTATTTCTTTA  
GTTTAATGGTAGAACAATGATCTTCTAATTCATTGGTTTTAGTTCGAATCTAAAAAGGAAATAAG  
AAATATATTCTTATTATTACTTATATAATAATTATTTCTTAAAAATATACATTTTGCAATTATAGCCGT  
TTAGCTGTATTAAAAATGTAAATGATATAAAATAGAATAAATATTTAAATTATTCCTATGTTATATT  
ATCCTATATTGCAACCATTATCAGAAGTTGTATTAATACTTGTACCTGCCTTATTAGCTGTAGCTT  
ATGTTACAGTTGCTGAAAGAAAACTATGGCTAGTATGCAAAGAAGATTAGGTCCTAATGCTGT  
AGGTTACTATGGACTATTGCAAGCATTTGCTGATGCCTTAAACCTTTTATTAAGAATATGTAG  
CTCCTACACAATCTAATATTGTTCTTTTCTTTTAGGTCCTGTAATAACTTTAATTTTGCATTATTA  
GGTTACGCTGTTATACCCTATGGTCCTGGTTCAGGGATAAGCGACATGAATTTAGGTATATTTTA  
CATGTTAGCTGTGTCATCTTTAGCTACATACGGTATTCTATTAGCTGGTTGAAGTGCGAATAGTA  
AATACGCTTTTCTAGGTTCTCTTAGAAGTACAGCTCAATTAATTAGTTATGAATTAATTAAGTT  
CAGCTATATTAATAGTAATTATGATAACAGGAAATTTAAATTTAACTGTTTGTACTGAATCTCAAA  
GAGCTATTTGATTTATACTACCTTTATTTCTGTGTTTATAATATTTTTCATAGGATCTATAGCTGA  
GACAAATAGAGCTCCTTTTGATTTAGCCGAGGCTAACCTGCTAATCTGGTTTGGTCTGGTTATAT  
GTCACAAATTGCTAGGAAACCTTTTTATTTAAAAACAAAAGACAATTAGCAGGAACTTAATTT  
AACCTAATTAATAATTAGATAAATAAATCTTTCATAGACTAAACGTGACAATTAATATATATA  
TATATTTATTTATATATATGATTAATAAGATATAGTCAATCATCGGTGTGAATCGACTTAAAAAA  
AAAAGCACATGGGTAAACCCATCTCCCCTTATTAGGGGAATCAGAACTTGTTAGTGGGTTTCAT  
GACAGAGCATGCTGCCGTAGTTTTCGTATTCTTCTTTTATAGCTGAGTACGGTAGTATTGTACTAAT  
GTGTATTTTAACTAGTATATTATTTATTGGTGGTTACTTATTATTTGAAATATCCTATGTTTTTACTG  
TGGTAAATTATATTTTCTTTGAATTATTCTTTATAGACTGAGTAACATTTGTAGAGGTACAATCTTT  
ATACACTGATTTTTTAAATAATTCTATCATTGAAGGATTATTATATGGGTTTAACTAGGATTA  
AAGTTCTTTAATGATATTCACATTTATTTGAGCTAGAGCATCCTTCCCTAGAATACGATTTGATCA  
ACTAATGGGCTTCTGTTGAACAGTTTTATTACCTATTAATTTTGCAATTATTATATTAGTACCTTGT  
GTTTTATATAGTTTTAACTTATTACCTGTAAATATACCATTGTTCTAGCTCACACACCCGCCGCC  
CTACTGCCACAAGGCTACAGTACATATGAGGAGGGGAATAAGATCTAGAACTATCCTAGTTA  
ATAATTACACTTAATAGTATACTAAATAGACCATCTATCATACTCGAGAATAGTGATAGTGAAT  
TATACACTATTTTAACTGTATTCTACACTATTAGCATATTATTATCTTTATATGATAATAATTTTATA  
ACTTAATTTATTAGGTTACATTAACAAAAAATTCGTTAACTTTTTTACCACCTTTTAAATACAAAAT  
ACGAATTTTA

>Hu-1

ATAACAATTCTAAAGAACATAAAGAGTTATTAGATAAAAAATAATTCACCTATACAGTTAATAAAT  
CAACTTAAAGGTATTTTTTCATAAATCCTTTATTAGCTTTAAGTTTAGCTATTACTATTTTCTCTTT  
TGCAGGTATTCCTCCTCTTGTAGGGTCTTTGCTAAACAGATGGTATTAAGCGCGGCTATTGATC

AAGGTTATATCTTTTTATCTTTAGTTGCAATATTAAGTGTATAGGAGGGGTTTATTATTTAAA  
TATAATTAAGAAATGTTCTTTTATTCACCTGACTATAAATTAACGAAGAAATTAATAATAC  
TATTAATGGTCAAATTATTAATAGAAACAATAAAATATTAATGTTGAATTTAATTATACAAATGT  
AGTTATGTCTAGTTCTGTGGCAATAACTATTTCTACTATTACATTAGTAGTTTTATTATTCATGTTT  
ATGAATAAAGAATGATTAAGTCTGGGTACTATATTGGTACAATCTTTATTTAGCTATTAATGAGTA  
GTATGACATTATTTATAGGGTTTGTATCTGTTATAGCTATTTTATTTTAGCCATTAATTTTATATTT  
GCTCCTCATAATCCTTATCAAGAAAAATATAGTATTTTCGAGTGTGGTTTCCATAGTTTTTTAGGG  
CAAAATAGAACACAATTCGGTATAAAATTCCTTTATTTTGCTTTAGTTTATTTACTTTTAGATTTAG  
AAATATTATTAACCTTTCCCTTTGCTCTTAGTGAGTATGTTAATGGTATTTATGGTCTTTTAGTTAC  
TTTAATTTTATAGCTATAATAACTATAGGATTTATATTTGAATTAGGTAAGCGCTCTTAAATA  
GACAGCAGACAAAAATTATATACCTAAATTGAACGTTAATTACCATACAGAGTATGTTGGAAT  
AGGTAAGGTTTCTAAGTAAAGTTATAGAGGCAGAAAACCAAAAAACCTACCAAAGGGTAGCTA  
ATGGGAAGCTATTAATAAAAGATGATAACCTATATATAGTATAGTTACTATATATTTACTATA  
ACTAGGATTATTATATATATATATATTATCTTATTGTATATTAAGATTATTATTATTATAAGGTATA  
ATTAATATAGTATCTTATTGTATAAGAATATAATATATTAACCTATAATTAATTTTATTTTAAATTT  
TTAATTATAATTTTTTTTTATATCTAGATGCTTACACATCTACAGATGTAGAAGAGAACAAAATAT  
TGTTGTTATAGTAGTGGATGATATAGAAAAATATTTTATATTATTTATTTTGTAGGTAGCTTTT  
GAAGTGTGATAGAGAGGATATATGGACGGTAGGAGGTATTCATTTAATGAACAGTGGATA  
GTTTAAATTAACCTAGTTATAGTTTATGAATTTAAATTATAATTATATTAATGTAGGTTATGATAGA  
ATTATGTATTGATCCTTAAGAGTTAAGAGAGATACGCCACGTATAATACATATTGGTTTAGGGT  
TGAGTATATATACTTAAGAGTTAAGAATATATATATACAATATATAATAAATATAGTAATATATTA  
ATGGTATGGACTTAACCAGGTTTATATATTATCATTTGATAAACATTAATTATAATTTTCTATTTA  
TTATTATTATACTGTGAGATTAATAATTATTAATAATATTACATAGTACGTGATATTTGG  
GGATTTTATCTTATTAATTGGCAATTAATGATTCTAATCAAATTTTATTCTCTTTAGTTTAAATGGTA  
GAACAATGATCTTCTAATTCATTGGTTTTAGTTGATTCTAAAAAGAGATGAGTAAATAATTTTCT  
AGATCAGAAATACTACTTTTAACTACAAAAAGCTTACGCTTTTAAACATTTTTTGTAAATAACA  
ACTATTGTTAATATTTGGCTGTCTATTGGTTTAACTAACAATTACAAAATTTTTCAATTTTTATAAT  
ATAAATTTAAATGAGAATATTAATAAGTCATTCAATTATTAATAATTAGTGAATCTTACCTTATCGA  
TGCGTCACAACCAAGTAACATTAGTTACTTGTGAAATTTTGGTTCATTATTAGCTGTTTGTTAAT  
AGTACAAATTATTACCGGTATTACATTAGCTATGCATTATAGTCCTAGTGAATGGAAGCTTTTAA  
CTCAATAGAGCATATAATGAGAGATGTTAATAACGGGTGATTAGTTCGTTATCTACATAGTAATA  
CAGCTTCTGCTTCTTTTTCTTAGTGTATTTACACATAGGAAGAGGTATATATTACGGATCATATA  
GAGCTCCTCGTACTTTAGTTGAGCTATTGGTACTGTTATATTAATATTAATGATGGCTATCGGTT  
TCCTAGGTTATGTTTTACCTTATGGACAGATGTCATTATGAGGTGCTACAGTTATTACTAATCTTA  
TTAGTGCTATACCTGAATAGGGCAAGATATTGTTGAATTCATTTGAGGTGGTTTTCTGTTAATA  
ATGCCACTTTAAACAGATTTTTGCATTACATTTGTATTGCCTTTGTATTAGCTGCTTAGTTTA  
ATGCACTTAATTGCACTTCATGATACTGCTGGTTCAAGCAATCCTCTTGGTGTTCAGGTAATTAC  
GATAGAATTACATTTGCTCCATATTTTTATTTAAAGATTTAATTACTATTTTATATTTATTTTGT  
TTAAGTGCTTTTGTATTCTTTATGCCTAATGTTTTAGGGGATAGTGATAATTATATTATGGCTAATC  
CTATGCAAACCTCCTGCTGCTATTGTACCTGAATGATACTTATTACCTTTCTATGCTATTTTAAAGATC  
TATACCTAATAAATTATTAGGTGTTATAGCGATGTTTAGTGCTATTTAGCTATTATGTTATTACCT  
GTTACAGATTTAGGTAGATCTAGAGGTTTACAATTTAGACCATTTAGTAAATAGCTTTCTGAGTT  
TTTGTTGCTAATTTCTTAGTTTAAATGCAATTAGGTGCTAAACACGTTGAAGATCCATTTATATTAT  
TAGGTCAATTAAGTACTGTATTATACTTTAGTTATTTTGTGCTATATTACCTTTAGCTAGTTACTT

AGATAATAGTTTAACTGATTTATCTAATAAATCTGAATTATTTTTAAATAAACTAACTAAATATAT  
TAAGATTATTATTTAATATATTTTCTATTTAAGATACTATTAATTTAGTATTTTGGGTTTTTCAGTTTA  
TAATTTATATTATATTATGCATTACCTCCACCTTGCTTTGTAGTAAGCTAATCTGTTATTTCCCTTA  
GTTTAATGGTAGAACAATGATCTTCTAATTCATTGGTTTTAGTTCGAATCTAAAAAGGAAATAAG  
AAATATATTCTTATTATTACTTATATAATAATTATTTCTTAAAAATATACATTTTGCATTATAGCCGT  
TTAGCTGTATTAAAATGTAAAATGATATAAAATAGAATAAATATTTAAATTATTCCTATGTTATATT  
ATCCTATATTGCAACCATTATCAGAAAGTTGTATTAATACTTGTACCTGCCTTATTAGCTGTAGCTT  
ATGTTACAGTTGCTGAAAGAAAACTATGGCTAGTATGCAAAGAAGATTAGGTCCTAATGCTGT  
AGGTTACTATGGACTATTGCAAGCATTGCTGATGCCTTAAACTTTTTATTAAGAATATGTAG  
CTCCTACACAATCTAATATTGTTCTTTTCTTTTAGGTCCTGTAATAACTTTAATTTTTGCATTATTA  
GGTTACGCTGTTATACCCTATGGTCCTGGTTCAGGGATAAGCGACATGAATTTAGGTATATTTTA  
CATGTTAGCTGTGTCATCTTTAGCTACATACGGTATTCTATTAGCTGGTTGAAGTGCGAATAGTA  
AATACGCTTTTCTAGGTTCTCTTAGAAGTACAGCTCAATTAATTAGTTATGAATTAATTAAGTT  
CAGCTATATTAATAGTAATTATGATAACAGGAAATTTAAATTTAACTGTTTGTACTGAATCTCAA  
GAGCTATTTGATTTATACTACCTTTATTTCTGTGTTTATAATTTTTCATAGGATCTATAGCTGA  
GACAAATAGAGCTCCTTTTGATTTAGCCGAGGCTAACCTGCTAATCTGGTTTGGTCTGGTTATAT  
GTCACAAATTGCTAGGAAACCTTTTTATTTAAAAACAAAAGACAATTAGCAGGAAACTTAATTT  
AACCTAATTAATAATTAGATAATTAACTCTTCATAGACTAAACGTGACAATTTAATATATATA  
TATATTTATTTATATATATGATTAAATAAGATATAGTCAATCATCGGTGTGAATCGACTTAAAAA  
AAAAGCACATGGGTAAACCCATCTCCCCTATTAGGGGAATCAGAACTTGTTAGTGGGTTTCAT  
GACAGAGCATGCTGCCGTAGTTTTCGTATTCTTCTTTTAGCTGAGTACGGTAGTATTGTACTAAT  
GTGTATTTTAACTAGTATATTATTTATTGGTGGTTACTTATTATTTGAAATATCCTATGTTTTACTG  
TGGTAAATTATATTTCTTTGAATTATTCTTTATAGACTGAGTAACATTTGTAGAGGTACAATCTTT  
ATACACTGATTTTTTAAATAATTCTATCATTGAAGGATTATTATATGGGTTTAACTAGGATTAAA  
AAGTTCCTTAATGATATTCACATTTATTTGAGCTAGAGCATCCTTCCCTAGAATACGATTTGATCA  
ACTAATGGGCTTCTGTTGAACAGTTTTATTACCTATTAATTTTGCAATTATTATATTAGTACCTTGT  
GTTTTATATAGTTTTAACTTATTACCTGTAAATATACCATTGTTCTAGCTCACACACCCGCCGCC  
CTACTGCCACAAGGCTACAGTACATATGAGGAGGGGAATAAAGATCTAGAATACTATCCTAGTTA  
ATAATTACACTTAATAGTATACTAAATAGACCATCTATCATACTCGAGAATAGTGATAGTGAAT  
TATACACTATTTTAACTGTATTCTACACTATTAGCATATTATTATCTTTATATGATAATAATTTATA  
ACTTAATTTATTAGGTTACATTAACAAAAAATTCGTTAACTTTTTTCACCACTTTTAAATACAAAAT  
ACGAATTTTA

>Hu-2

ATAACAATTCTAAAGAACATAAAGAGTTATTAGATAAAAAATAATTCACCTATACAGTTAATAAAT  
CAACTTAAAGGGTATTTTTTCATAAATCCTTTATTAGCTTTAAGTTTAGCTATTACTATTTCTCTTT  
TGCAGGTATTCCTCCTCTTGTAGGGTCTTTGCTAAACAGATGGTATTAAGCGCGGCTATTGATC  
AAGGTTATATCTTTTTATCTTTAGTTGCAATATTAAGTGTATAGGAGGGGTTTATTATTTAAA  
TATAATTAAGAAATGTTCTTTTATTCACCTGACTATAAATTAAACGAAGAAATTAATAAATAC  
TATTAATGGTCAAATTATTAATAGAAACAATAAAATATTAAATGTTGAATTTAATTATACAAATGT  
AGTTATGTCTAGTTCTGTGGCAATAACTATTTCTACTATTACATTAGTAGTTTTATTATTCATGTTT  
ATGAATAAAGAATGATTAAGTCTGGGTACTATATTGGTACAATCTTTATTTAGCTATTAATGAGTA  
GTATGACATTATTTATAGGGTTTGTATCTGTTATAGCTATTTTATTTTAGCCATTAATTTATATTT  
GCTCCTCATAATCCTTATCAAGAAAAATATAGTATTTTCGAGTGTGGTTTCCATAGTTTTTAGGG  
CAAAATAGAACACAATTCGGTATAAAATCTTTATTTTGTCTTAGTTTATTTACTTTTAGATTTAG

AAATATTATTAACTTTCCCTTTTCGCTCTTAGTGAGTATGTTAATGGTATTTATGGTCTTTTAGTTAC  
TTTAATTTTTATAGCTATAATAACTATAGGATTTATATTTGAATTAGGTAAAAGCGCTCTTAAAATA  
GACAGCAGACAAAAATTATATATACCTAAATTGAACGTTAATTACCATACAGAGTATGTTGGAAT  
AGGTAAGGTTTCTAAGTAAAGTTATAGAGGCAGAAAACCAAAAAACCTACCAAAGGGTAGCTA  
ATGGGAAGCTATTAATAAATAAAGATGATAACCTATATATAGTATAGTTACTATATATTTACTATA  
ACTAGGATTATTATATATATATATATTATCTTATTGTATATTAAGATTATTATTATAAGGTATA  
ATTAATATAGTATCTTATTGTATAAGAATATAATATATTAACCTATAATTAATTTTATTTTTTAATTT  
TTAATTATAATTTTTTTTTTATATCTAGATGCTTACACATCTACAGATGTAGAAGAGAACAAAATAT  
TGTTGTTATAGTAGTGGATGATATAGAAAAATTTTTTATATTATTTATTTTTGTTAGGTAGCTTTT  
GAAGTGTTTGATAGAGAGGATATATGGACGGTAGGAGGGTATTCATTTTAATGAACAGTGGAATA  
GTTTAAATTAACCTAGTTATAGTTTATGAATTTAAATTATAATTATATTAATGTAGGTTATGATAGA  
ATTATGTATTGATCCTTAAGAGTTAAGAGAGATACGCCCACGTATAATACATATTGGTTTAGGGT  
TGAGTATATATACTTAAGAGTTAAGAATATATATATACAATATATAATAAATATAGTAATATATTA  
ATGGTATGGACTTAACCAGGTTTATATATTATCATTTGATAAACATTAATTATAATTTTTCTATTTA  
TTATTATTATTATACTGTGAGATTAATAATTATTAATAATATAATATTACATAGTACGTGATATTTGG  
GGATTTTATCTTATTAATTGGCAATTAATGATTCTAATCAAATTTTATTCTCTTTAGTTTAATGGTA  
GAACAATGATCTTCTAATTCATTGGTTTTAGTTTCGATTCTAAAAAGAGATGAGTAAATAATTTTCT  
AGATCAGAAATACTACTTTTAACTACAAAAGCTTACGCTTTTTAACATTTTTTTGATAAATAACA  
ACTATTGTTAATATTTGGCTGTCTATTGGTTTAACTAACAATTACAAAATTTTTTCAATTTTTATAAT  
ATAAATTTAAATGAGAATATTAATAAAGTCATTCAATTATTAATAATTAGTGAATTCTTACCTTATCGA  
TGCGTCACAACCAAGTAACATTAGTTACTTGTGAAATTTTGGTTCATTATTAGCTGTTTGTTAAT  
AGTACAAATTATTACCGGTATTACATTAGCTATGCATTATAGTCCTAGTGAATGGAAGCTTTTAA  
CTCAATAGAGCATATAATGAGAGATGTTAATAACGGGTGATTAGTTCGTTATCTACATAGTAATA  
CAGCTTCTGCTTTCTTTTTCTTAGTGATTTACACATAGGAAGAGGTATATATTACGGATCATATA  
GAGCTCCTCGTACTTTAGTTTGAGCTATTGGTACTGTTATATTAATTAATGATGGCTATCGGTT  
TCCTAGGTTATGTTTTACCTTATGGACAGATGTCATTATGAGGTGCTACAGTTATTACTAATCTTA  
TTAGTGCTATACCTGAATAGGGCAAGATATTGTTGAATTCATTTGAGGTGGTTTTTCTGTTAATA  
ATGCCACTTTAAACAGATTTTTTGCAATTACATTTGTATTGCCTTTTGTATTAGCTGCTTTAGTTTTA  
ATGCACTTAATTGCACTTCATGATACTGCTGGTTCAAGCAATCCTCTTGGTGTTTCAGGTAATTAC  
GATAGAATTACATTTGCTCCATATTTTTATTTAAAGATTTAATTACTATTTTTATATTTATTTTTGTA  
TTAAGTGCTTTTGATTCTTTATGCCTAATGTTTTAGGGGATAGTGATAATTATATTATGGCTAATC  
CTATGCAAACCTCCTGCTGCTATTGTACCTGAATGATACTTATTACCTTTCTATGCTATTTTAAGATC  
TATACCTAATAAATTATTAGGTGTTATAGCGATGTTTAGTGCTATTTAGCTATTATGTTATTACCT  
GTTACAGATTTAGGTAGATCTAGAGGTTTACAATTTAGACCATTTAGTAAATAGCTTTCTGAGTT  
TTTGTTGCTAATTTCTTAGTTTAAATGCAATTAGGTGCTAAACACGTTGAAGATCCATTTATATTAT  
TAGGTCAATTAAGTACTGTATTATACTTTAGTTATTTTGTTGCTATATTACCTTTAGCTAGTTACTT  
AGATAATAGTTTAACTGATTTATCTAATAAATCTGAATTATTTTAAATAAACTAACTAAATATAT  
TAAGATTATTATTTAATATATTTTCTATTTAAGATACTATTAATTTAGTATTTTGGGTTTTAGTTTA  
TAATTTATATTATATTATGCATTACCCTCCACCTTGCTTTGTAGTAAGCTAATCTGTTATTTCTTTA  
GTTTAAATGGTAGAACAAATGATCTTCTAATTCATTGGTTTTAGTTTGAATCTAAAAAGGAAATAAG  
AAATATATTCTTATTATTACTTATATAATAATTATTTCTTAAAAATATACATTTTGCAATTATAGCCGT  
TTAGCTGTATTAAATGTAAATGATATAAAATAGAATAAATATTTAAATTATTCCTATGTTATATT  
ATCCTATATTGCAACCATTATCAGAAGTTGTATTAATACTTGTACCTGCCTTATTAGCTGTAGCTT  
ATGTTACAGTTGCTGAAAGAAAACTATGGCTAGTATGCAAAGAAGATTAGGTCCTAATGCTGT

AGGTTACTATGGACTATTGCAAGCATTGCTGATGCCTTAAACCTTTTATTTAAAGAATATGTAG  
CTCCTACACAATCTAATATTGTTCTTTTCTTTTAGGTCCTGTAATAACTTTAATTTTGCATTATTA  
GGTTACGCTGTTATACCCTATGGTCCTGGTTCAGGGATAAGCGACATGAATTTAGGTATATTTTA  
CATGTTAGCTGTGTCATCTTTAGCTACATACGGTATTCTATTAGCTGGTTGAAGTGCGAATAGTA  
AATACGCTTTTCTAGGTTCTCTTAGAAGTACAGCTCAATTAATTAGTTATGAATTAATATTAAGTT  
CAGCTATATTAATAGTAATTATGATAACAGGAAATTTAAATTTAACTGTTTGTACTGAATCTCAAA  
GAGCTATTTGATTTATACTACCTTTATTTCTGTGTTTATAATATTTTTCATAGGATCTATAGCTGA  
GACAAATAGAGCTCCTTTTGATTTAGCCGAGGCTAACCTGCTAATCTGGTTTGGTCTGGTTATAT  
GTCACAAATTGCTAGGAAACCTTTTTATTTTAAAAACAAAAGACAATTAGCAGGAAACTTAATTT  
AACCTAATTAATAATATTAGATAATTAACCTCTTCATAGACTAAACGTGACAATTTAATATATATA  
TATATTTATTTATATATATGATTAAATAAGATATAGTCAATCATCGGTGTGAATCGACTTAAAAAA  
AAAAGCACATGGGTAAACCCATCTCCCCTTATTAGGGGAATCAGAAGTTGTTAGTGGGTTTCAT  
GACAGAGCATGCTGCCGTAGTTTTCGTATTCTTCTTTTAGCTGAGTACGGTAGTATTGTACTAAT  
GTGTATTTTAACTAGTATATTATTTATTGGTGGTTACTTATTATTTGAAATATCCTATGTTTTACTG  
TGGTAAATTATATTTTCTTTGAATTATCTTTATAGACTGAGTAACATTTGTAGAGGTACAATCTTT  
ATACACTGATTTTTTAAATAATTCTATCATTGAAGGATTATTATATGGGTTTAACTAGGATTAAA  
AAGTTCTTTAATGATATTCACATTTATTTGAGCTAGAGCATCCTTCCCTAGAATACGATTTGATCA  
ACTAATGGGCTTCTGTTGAACAGTTTTATTACCTATTAATTTTGCAATTATTATATTAGTACCTTGT  
GTTTTATATAGTTTTAACTTATTACCTGTAAATATACCATTGTTCTAGCTCACACACCCGCCGCC  
CTACTGCCACAAGGCTACAGTACATATGAGGAGGGGAACTAAAGATCTAGAAGTATCCTAGTTA  
ATAATTACACTTAATAGTATACTAAATAGACCATCTATCATACTCGAGAATAGTGATAGTGTAAT  
TATACACTATTTTAACTGTATTCTACACTATTAGCATATTATTATCTTTATATGATAATAATTTTATA  
ACTTAATTTATTAGGTTACATTAACAAAAAATTCGTTAACTTTTTTCACCACTTTTAAATACAAAAT  
ACGAATTTTA

>I-1

ATAACAATTCTAAAGAACATAAAGAGTTATTAGATAAAAAATAATTCACCTATACAGTTAATAAAT  
CAACTTAAAGGGTATTTTTTCATAAATCCTTTATTAGCTTTAAGTTTAGCTATTACTATTTTCTCTTT  
TGCAGGTATTCCTCCTCTGTAGGGTTCTTTGCTAAACAGATGGTATTAAGCGCGGCTATTGATC  
AAGGTTATATCTTTTTATCTTTAGTTGCAATATTAAGTGTATAGGAGGGGTTTATTATTTAAA  
TATAATTAAGAAATGTTCTTTTATTCACCTGACTATAAATTAACGAAGAAATTAATAAATAC  
TATTAATGGTCAAATTATTAATAGAAACAATAAAATATTAATGTTGAATTTAATTATACAAATGT  
AGTTATGTCTAGTTCTGTGGCAATAACTATTTCTACTATTACATTAGTAGTTTTATTATTCATGTTT  
ATGAATAAAGAATGATTAAGTCTGGGTACTATATTGGTACAATCTTTATTTAGCTATTAATGAGTA  
GTATGACATTATTTATAGGGTTTGTATCTGTTATAGCTATTTTATTTTAGCCATTAATTTTATATTT  
GCTCCTCATAATCCTTATCAAGAAAAATATAGTATTTTCGAGTGTGGTTTCCATAGTTTTTTAGGG  
CAAAATAGAACACAATTCGGTATAAAATCTTTATTTTGCTTTAGTTTATTTACTTTTAGATTTAG  
AAATATTATTAACTTTCCCTTTCGCTCTTAGTGAGTATGTTAATGGTATTTATGGTCTTTTAGTTAC  
TTTAATTTTTATAGCTATAATAACTATAGGATTTATATTTGAATTAGGTAAAAGCGCTCTTAAATA  
GACAGCAGACAAAAATTATATATACCTAAATTGAACGTTAATTACCATACAGAGTATGTTGGAAT  
AGGTAAGGTTTCTAAGTAAAGTTATAGAGGCAGAAAACCAAAAAACCTACCAAAGGGTAGCTA  
ATGGGAAGCTATTAAAAATAAAGATGATAACCTATATATAGTATAGTTACTATATATTTACTATA  
ACTAGGATTATTATATATATATATATTATCTTATTGTATATTAAGATTATTATTATAAGGTATA  
ATTAATATAGTATCTTATTGTATAAGAATATAATATATTAACCTATAATTAATTTTATTTTAAATTT  
TTAATTATAATTTTTTTTTATATCTAGATGCTTACACATCTACAGATGTAGAAGAGAACAAAATAT

TGTTGTTATAGTAGTGGATGATATAGAAAAATATTTTTATATTATTTATTTTTGTTAGGTAGCTTTT  
GAAGTGTGTTGATAGAGAGGATATATGGACGGTAGGAGGGTATTCATTTTAATGAACAGTGGATA  
GTTTAAATTAACCTAGTTATAGTTTATGAATTTAAATTATAATTATATTAATGTAGGTTATGATAGA  
ATTATGTATTGATCCTTAAGAGTTAAGAGAGATACGCCCACGTATAATACATATTGGTTTAGGGT  
TGAGTATATATACTTAAGAGTTAAGAATATATATATACAATATATAATAAATATAGTAATATATTA  
ATGGTATGGACTTAACCAGGTTTATATATTATCATTGATAAACATTAATTATAATTTTTCTATTTA  
TTATTATTATTATACTGTGAGATTAATAATTATTTAAATATAATATTACATAGTACGTGATATTTGG  
GGATTTTATCTTATTAATTGGCAATTAATGATTCTAATCAAATTTTATTCTCTTTAGTTTAATGGTA  
GAACAATGATCTTCTAATTCATTGGTTTTAGTTTCGATTCTAAAAAGAGATGAGTAAATAATTTTCT  
AGATCAGAAATACTACTTTTAACTACAAAAAGCTTACGCTTTTAAACATTTTTTTGATAAATAACA  
ACTATTGTTAATATTTGGCTGTCTATTGGTTTAACTACAATTACAAAATTTTTTCAATTTTTATAAT  
ATAAATTTAAATGAGAATATTTAAAAAGTCATTATTATTTAAATTAGTGAATTCTTACCTTATCGA  
TGCGTCACAACCAAGTAACATTAGTTACTTGTGAAATTTTGGTTCATTATTAGCTGTTTGTTAAT  
AGTACAAATTATTACCGGTATTACATTAGCTATGCATTATAGTCCTAGTGAATGGAAGCTTTTAA  
CTCAATAGAGCATATAATGAGAGATGTTAATAACGGGTGATTAGTTCGTTATCTACATAGTAATA  
CAGCTTCTGCTTTCTTTTCTTAGTGATTACACATAGGAAGAGGTATATATTACGGATCATATA  
GAGCTCCTCGTACTTTAGTTTGAGCTATTGGTACTGTTATATTAATTAATGATGGCTATCGGTT  
TCCTAGGTTATGTTTTACCTTATGGACAGATGTCATTATGAGGTGCTACAGTTATTACTAATCTTA  
TTAGTGCTATACCTGAATAGGGCAAGATATTGTTGAATTCATTGAGGTGGTTTTCTGTTAATA  
ATGCCACTTTAAACAGATTTTTGCATTACATTTGTATTGCCTTTGTATTAGCTGCTTGTATTTA  
ATGCACTTAATTGCACTTCATGATACTGCTGGTTCAAGCAATCCTCTGGTGTTTCAGGTAATTAC  
GATAGAATTACATTTGCTCCATATTTTTATTTAAAGATTTAATTACTATTTTTATATTTATTTTGT  
TTAAGTGCTTTGTATTCTTTATGCCTAATGTTTTAGGGGATAGTGATAATTATATTATGGCTAATC  
CTATGCAAACCTCCTGCTGCTATTGTACCTGAATGATACTTATTACCTTTCTATGCTATTTTAAGATC  
TATACCTAATAAATTATTAGGTGTTATAGCGATGTTTAGTGCTATTTAGCTATTATGTTATTACCT  
GTTACAGATTTAGGTAGATCTAGAGGTTTACAATTTAGACCATTTAGTAAAATAGCTTTCTGAGTT  
TTTGTTGCTAATTTCTTAGTTTTAATGCAATTAGGTGCTAAACACGTTGAAGATCCATTTATATTAT  
TAGGTCAATTAAGTACTGTATTATACTTTAGTTATTTTGTGCTATATTACCTTTAGCTAGTTACTT  
AGATAATAGTTTAACTGATTTATCTAATAAATCTGAATTATTTTAAATAAACTAACTAAATATAT  
TAAGATTATTATTTAATATATTTTCTATTTAAGATACTATTAATTTAGTATTTTGGGTTTTAGTTTA  
TAATTTATATTATATTATGCATTACCCTCCACCTTGCTTTGTAGTAAGCTAATCTGTTATTTCTTTA  
GTTTAATGGTAGAACAATGATCTTCTAATTCATTGGTTTTAGTTTGAATCTAAAAAGGAAATAAG  
AAATATATTCTTATTATTACTTATATAATAATTATTTCTTAAAAATATACATTTTGATTATAGCCGT  
TTAGCTGTATTAAATGTAAATGATATAAAATAGAATAAATATTTAAATTATTCCTATGTTATATT  
ATCCTATATTGCAACCATTATCAGAAGTTGTATTAATACTTGTACCTGCCTTATTAGCTGTAGCTT  
ATGTTACAGTTGCTGAAAGAAAACTATGGCTAGTATGCAAAGAAGATTAGGTCCTAATGCTGT  
AGGTTACTATGGACTATTGCAAGCATTTGCTGATGCCTTAAACCTTTTATTAAGAATATGTAG  
CTCCTACACAATCTAATATTGTTCTTTTCTTTTAGGTCCTGTAATAACTTTAATTTTTGCATTATTA  
GGTTACGCTGTTATACCCTATGGTCCTGGTTCAGGATAAGCGACATGAATTTAGGTATATTTTA  
CATGTTAGCTGTGTCATCTTTAGCTACATACGGTATTCTATTAGCTGGTTGAAGTGCGAATAGTA  
AATACGCTTTTCTAGGTTCTCTTAGAAGTACAGCTCAATTAATTAGTTATGAATTAATTAAGTT  
CAGCTATATTAATAGTAATTATGATAACAGGAAATTTAAATTTAACTGTTTGTACTGAATCTCAAA  
GAGCTATTTGATTTATACTACCTTTATTTCTGTGTTTATAATATTTTTCATAGGATCTATAGCTGA  
GACAAATAGAGCTCCTTTTGATTTAGCCGAGGCTAACCTGCTAATCTGGTTTGGTCTGGTTATAT

GTCACAAATTGCTAGGAAACCTTTTTATTTTAAAAACAAAAGACAATTAGCAGGAACTTAATTT  
AACCTAATTAATAATATTAGATAATTAACCTCTTCATAGACTAAACGTGACAATTTAATATATATA  
TATATTTATTTATATATATGATTAAATAAGATATAGTCAATCATCGGTGTGAATCGACTTAAAAAA  
AAAAGCACATGGGTAAACCCATCTCCCCTTATTAGGGGAATCAGAACTTGTTAGTGGGTTTCAT  
GACAGAGCATGCTGCCGTAGTTTTCGTATTCTTCTTTTAGCTGAGTACGGTAGTATTGTACTAAT  
GTGTATTTTAACTAGTATATTATTTATTGGTGGTTACTTATTATTTGAAATATCCTATGTTTTACTG  
TGGTAAATTATATTTTCTTTGAATTATTCTTTATAGACTGAGTAACATTTGTAGAGGTACAATCTTT  
ATACACTGATTTTTTAAATAATTCTATCATTGAAGGATTATTATATGGGTTTAATCTAGGATTAAA  
AAGTTCTTTAATGATATTCACATTTATTTGAGCTAGAGCATCCTTCCCTAGAATACGATTTGATCA  
ACTAATGGGCTTCTGTTGAACAGTTTTATTACCTATTAATTTTGCAATTATTATATTAGTACCTTGT  
GTTTTATATAGTTTTAACTTATTACCTGTAAATATACCATTGTTCTAGCTCACACACCCGCCGCC  
CTACTGCCACAAGGCTACAGTACATATGAGGAGGGGAACCTAAAGATCTAGAACTATCCTAGTTA  
ATAATTACACTTAATAGTATACTAAATAGACCATCTATCATACTCGAGAATAGTGATAGTGTAAT  
TATACACTATTTTAACTGTATTCTACACTATTAGCATATTATTATCTTTATATGATAATAATTTTATA  
ACTTAATTTATTAGGTTACATTAACAAAAAATTCGTTAACTTTTTTCACCACTTTTAAATACAAAAT  
ACGAATTTTA

>LZJ-32-5

ATAACAATTCTAAAGAACATAAAGAGTTATTAGATAAAAAATAATTCACCTATACAGTTAATAAAT  
CAACTTAAAGGGTATTTTTTCATAAATCCTTTATTAGCTTTAAGTTAGCTATTACTATTTTCTCTTT  
TGCAGGTATTCCTCCTCTTGTAGGGTCTTTGCTAAACAGATGGTATTAAGCGCGGCTATTGATC  
AAGGTTATATCTTTTATCTTTAGTTGCAATATTAAGTGTATAGGAGGGGTTTATTATTTAAA  
TATAATTAAGAAATGTTCTTTTATTCACCTGACTATAAATTAACGAAGAAATTAATAAATAC  
TATTAATGGTCAAATTATTAATAGAAACAATAAAATATTAATGTTGAATTTAATTATACAAATGT  
AGTTATGTCTAGTTCTGTGGCAATAACTATTTCTACTATTACATTAGTAGTTTTATTATTCATGTTT  
ATGAATAAAGAATGATTAAGTCTGGGTACTATATTGGTACAATCTTTATTTAGCTATTAATGAGTA  
GTATGACATTATTTATAGGGTTTGTATCTGTTATAGCTATTTTATTTTAGCCATTAATTTATATTT  
GCTCCTCATAATCCTTATCAAGAAAAATATAGTATTTTCGAGTGTGGTTTCCATAGTTTTTTAGGG  
CAAAATAGAACACAATTCGGTATAAAATCTTTATTTTGCTTTAGTTTATTTACTTTTAGATTTAG  
AAATATTATTAACCTTCCCTTTCGCTCTTAGTGAGTATGTTAATGGTATTTATGGTCTTTTAGTTAC  
TTTAATTTTTATAGCTATAATAACTATAGGATTTATATTTGAATTAGGTAAAAGCGCTCTTAAATA  
GACAGCAGACAAAAATTATATACCTAAATTGAACGTTAATTACCATACAGAGTATGTTGGAAT  
AGGTAAGGTTTCTAAGTAAAGTTATAGAGGCAGAAAACCAAAAAACCTACCAAAGGGTAGCTA  
ATGGGAAGCTATTAATAAAGATGATAACCTATATATAGTATAGTTACTATATATTTACTATA  
ACTAGGATTATTATATATATATATATTATCTTATTGTATATTAAGATTATTATTATAAGGTATA  
ATTAATATAGTATCTTATTGTATAAGAATATAATATATTAACCTATAATTAATTTATTTTTTATTT  
TTAATTATAATTTTTTTTTATATCTAGATGCTTACACATCTACAGATGTAGAAGAGAACAAAATAT  
TGTTGTTATAGTAGTGGATGATATAGAAAAATATTTTTATATTATTTATTTTGTAGGTAGCTTTT  
GAAGTGTGTTGATAGAGAGGATATATGGACGGTAGGAGGTATTCATTTAAATGAACAGTGGATA  
GTTTAAATTAACCTAGTTATAGTTTATGAATTTAAATTATAATTATATTAATGTAGGTATGATAGA  
ATTATGTATTGATCCTTAAGAGTTAAGAGAGATACGCCACGTATAATACATATTGGTTAGGGT  
TGAGTATATATACTTAAGAGTTAAGAATATATATATACAATATATAATAAATATAGTAATATATTA  
ATGGTATGGACTTAACCAGGTTTATATATTATCATTTGATAAACATTAATTATAATTTTTCTATTTA  
TTATTATTATTACTGTGAGATTAATAATTATTAATAATATTACATAGTACGTGATATTTGG  
GGATTTTATCTTATTAATTGGCAATTAATGATTCTAATCAAATTTTATTCTCTTAGTTTAATGGTA

GAACAATGATCTTCTAATTCATTGGTTTTAGTTCGATTCTAAAAAGAGATGAGTAAATAATTTTCT  
AGATCAGAAATACTACTTTTAACTACAAAAAGCTTACGCTTTTAAACATTTTTTGATAAATAACA  
ACTATTGTTAATATTTGGCTGTCTATTGGTTTAACTAACAATTACAAAATTTTTCAATTTTTATAAT  
ATAAATTTAAATGAGAATATTA AAAAGTCATTATTATTA AAAATTAGTGAATTCTTACCTTATCGA  
TGCGTCACAACCAAGTAACATTAGTTACTTGTGAAATTTTGGTTCATTATTAGCTGTTTGTTAAT  
AGTACAAATTATTACCGGTATTACATTAGCTATGCATTATAGTCCTAGTGAATGGAAGCTTTTAA  
CTCAATAGAGCATATAATGAGAGATGTTAATAACGGGTGATTAGTTCGTTATCTACATAGTAATA  
CAGCTTCTGCTTTCTTTTTCTTAGTGTATTTACACATAGGAAGAGGTATATATTACGGATCATATA  
GAGCTCCTCGTACTTTAGTTTGAGCTATTGGTACTGTTATATTAATTAATGATGGCTATCGGT  
TCCTAGGTTATGTTTTACCTTATGGACAGATGTCATTATGAGGTGCTACAGTTATTACTAATCTTA  
TTAGTGCTATACCTGAATAGGGCAAGATATTGTTGAATTCATTTGAGGTGGTTTTCTGTTAATA  
ATGCCACTTTAAACAGATTTTTGCATTACATTTGTATTGCCTTTGTATTAGCTGCTTTAGTTTTA  
ATGCACTTAATTGCACTTCATGATACTGCTGGTTCAAGCAATCCTCTTGGTGTTCAGGTAATTAC  
GATAGAATTACATTTGCTCCATATTATTTATTTAAAGATTTAATTACTATTTTTATATTTATTTTGT  
ATTAAGTGCTTTTGTATTCTTTATGCCTAATGTTTTAGGGGATAGTGATAATTATATTATGGCTAAT  
CCTATGCAAACCTCTGCTGCTATTGTACCTGAATGATACTTATTACCTTTCTATGCTATTTAAGAT  
CTATACCTAATAAAATTATTAGGTGTTATAGCGATGTTTAGTGCTATTTTAGCTATTATGTTATTACC  
TGTTACAGATTTAGGTAGATCTAGAGGTTACAATTTAGACCATTTAGTAAAATAGCTTTCTGAGT  
TTTTGTTGCTAATTTCTTAGTTTTAATGCAATTAGGTGCTAAACACGTTGAAGATCCATTTATATTA  
TTAGGTCAATTAAGTACTGTATTATACTTTAGTTATTTTGTGCTATATTACCTTTAGCTAGTTACTT  
AGATAATAGTTTAACTGATTTATCTAATAAATCTGAATTATTTTAAATAAAACTAACTAAATATAT  
TAAGATTATTATTTAATATATTTTCTATTTAAGATACTATTAATTTAGTATTTTGGGTTTTCAGTTTA  
TAATTTAGATTATATTATGCATTACCCTCCACCTTGCTTTGTAGTAAGCTAATCTGTTATTTCTTT  
AGTTTAATGGTAGAACAATGATCTTCTAATTCATTGGTTTTAGTTCGAATCTAAAAAGGAAATAA  
GAAATATATTCTTATTATTACTTATATAATAATTATTTCTAAAAATATACATTTTGCATTATAGCC  
GTTTAGCTGTATTA AAAATGTAAAATGATATA AAAATAGAATAAAATTTTAAATTATTCCTATGTTAT  
ATTATCCTATATTGCAACCATTATCAGAAGTTGTATTAATACTTGTACCTGCCTTATTAGCTGTAG  
CTTATGTTATAGTTGCTGAAAGAAAACTATGGCTAGTATGCAAAGAAGATTAGGTCCTAATGCT  
GTAGGTTACTATGGACTATTGCAAGCATTTGCTGATGCCTTAAACCTTTTATTTAAAGAATATGTA  
GCTCCTACACAATCTAATATTGTTCTTTTCTTTTAGGTCCTGTAATAAATTTAATTTTGCATTATT  
AGGTTACGCTGTTATACCCTATGGTCCTGGTTCAGGGATAAGCGACATGAATTTAGGTATATTTT  
ACATGTTAGCTGTGTCATCTTTAGCTACATACGGTATTCTATTAGCTGGTTGAAGTGCGAATAGT  
AAATACGCTTTTCTAGGTTCTCTTAGAAGTACAGCTCAATTAATTAGTTATGAATTAATATTAAGT  
TCAGCTATATTAATAGTAATTATGATAACAGGAAATTTAAATTTAACTGTTTGTACTGAATCTCAA  
AGAGCTATTTGATTATACTACCTTTATTTCTGTGTTATAATATTTTTCATAGGATCTATAGCTG  
AGACAAATAGAGCTCCTTTTGATTTAGCCGAGGCTAACCTGCTAATCTGGTTTGGTCTGGTTATA  
TGTCACAAATTGCTAGGAAACCTTTTTATTTTAAAAACAAAAGACAATTAGCAGGAAACTTAATT  
TAACCTAATTA AAAATATTAGATAATTA AACTCTTCATAGACTAAACGTGACAATTTAATATATAT  
ATATATTTATTTATATATATGATTAAATAAGATATAGTCAATCATCGGTGTGAATCGACTTAAAAA  
AAAAAGCACATGGGTAAACCCATCTCCCTTATTAGGGGAATCAGAACTTGTTAGTGGGTCA  
TGACAGAGCATGCTGCCGTAGTTTTCGTATTCTTCTTTTAGCTGAGTACGGTAGTATTGTAATA  
TGTGTATTTTAACTAGTATATTATTTATTGGTGGTTACTTATTATTTGAAATATCCTATGTTTTACT  
GTGGTAAATTATATTTCTTTGAATTATCTTTATAGACTGAGTAACATTTGTAGAGGTACAATCTT  
TATACACTGATTTTTTAAATAATTCTATCATTGAAGGATTATTATATGGGTTTAACTAGGATTA

AAGTTCTTTAATGATATTCACATTTATTTGAGCTAGAGCATCCTTCCCTAGAATACGATTTGATCA  
ACTAATGGGCTTCTGTTGAACAGTTTTATTACCTATTAATTTTGCAATTATTATATTAGTACCTTGT  
GTTTTATATAGTTTTAACTTATTACCTGTAAATATACCATTGTTCTAGCTCACACACCCGCCGCC  
CTACTGCCACAAGGCTACAGTACATATGAGGAGGGGAAGTAAAGATCTAGAACTATCCTAGTTA  
ATAATTACACTTAATAGTATACTAAATAGACCATCTATCATACTCGAGAATAGTGATAGTGTAAT  
TATACACTATTTTAACTGTATTCTACAATATTAGCATATTATTATCTTTATATGATAATAATTTTATA  
ACTTAATTTATTAGGTTACATTAACATAAAATAGTTAACTTTTTTCACCACTTTTAAATACAAAAT  
ACGAATTTTA

>MT-14-2

ATAACAATTCTAAAGAACATAAAGAGTTATTAGATAAAAAATAATTCACCAATACAGTTAATAAAT  
CAACTTAAAGGGTATTTTTTCATAAATCCTTTATTAGCTTTAAGTTTAGCTATCACTATCTTCTCTTT  
TGCAGGGATTCTCCTCTTGTAGGGTTCTTTGCTAAACAGATGGTATTAAGCGCGGCTATTGATC  
AAGGTTATATCTTTTTATCTTTAGTTGCAATATTAAGTGTAAATAGGAGGAGTTTATTATTTAAA  
TATAATAAAAGAAATGTTCTTCTATTACCTGACTATAAGTTAAACGAAGAAATTTAAAAATAATA  
CTATTAATGGTCAAATTATTAATAGAAACAATAAAACATTAAATGTAGAATTTAATTATACAAATG  
TCGTTATGTCTAGTTCTGTGGCAGTACTATTTCTACTATAACATTAGTAGTTTTATTATTCATGTTT  
ATGAATAAAGAATGATTAAGTCTGGGTACTATATTGGTACAATCTTTATTTAACTATTAATGAGTA  
GTATGACATTATTTATAGGGTTGTATCAGTAATAGCTATATTATTTTAGCTATTAATTTTATATTT  
GCTCCTCATAATCCTTATCAAGAAAAATATAGTATTTTCGAGTGTGGTTTCCATAGTTTTTTAGGG  
CAAAATAGAACACAATTCGGTATAAAATCCTTTATATTTGCTTTAGTTTATTTACTTTTAGATTTAG  
AAATATTATTAACTTTTCTTTTCGCTGTTAGTGAGTATGTTAATGGTATTTATGGTCTTTTAGTTAC  
TTTAATTTTTATAGCTATAATAACTATAGGATTTATATTTGAATTAGGTAAGCGCTCTTAAATA  
GATAGCAGACAAAAATTATATATACCTAAAGTAAACGTGAAATACCATACTGAGTACGTTAGAA  
TCGGTAAGGTTTCTAAGTAAAGTTATAGAGGCAGAAAACCAAAAAACCTACCAAAGGGTAGCT  
AATGGGAAGCTATTAAAAATAAAAGATGATAACCTATATATAGTATAGTTACTATATATTTACTAT  
AACTAGGATTATTATATATATATATATTATCTTATTGTATATTAAGATTATTATTATAAGGTAT  
AATTAATATAGTATCTTATTGTATAAGAATATAATATATTAACCTATAATTAATTTTATTTTAAAT  
TTTAATTATAATTTTTTTTTATATCTAGATGCTTACACATCTACAGATGTAGAAGAGAACAAAATA  
TTGTTGTTATAGTAGTGGATGATATAGAAAAATATTTTTATATTATTTATTTTGTAGGTAGCTTTT  
GAAGTGTTTGATAGAGAGGATATATGGACGGTAGGAGGGTATTCATTTAATGAACAGTGGATA  
GTTTAAATTAACCTAGTTATAGTTTATGAATTTAAATTATAATTATATTAATGTAGGTTATGATAGA  
ATTATGTATTGATCCTTAAGAGTTAAGAGAGATACGCCACGTATAATACATATTGGTTTAGGGT  
TGAGTATATATACTTAAGAGTTAAGAATATATATATACAATATATAATAAATATAGTAATATATTA  
ATGGTATGGACTTAACCAGGTTTATATATTATCATTTGATAAACATTAATTATAATTTTTCTATTTA  
TTATTATTATTATACTGTGAGATTAATAATTATTAATAATAATATTACATAGTACGTGATATTTGG  
GGATTTTATCTTATTAATTGGCCACTAATGAGTCTAATCAAAATTAATTCTCTTTAGTTTAAATGGTA  
GAACAATGATCTTCTAATTCATTGGTTTTAGTTTCGATTCTAAAAAGAGATGAGTAAATAATATTCT  
AGCTGAAAAATACTACTTTTAACTACAAAAGCTTACGCTTTTTAACATTTTTTGTAAATAACA  
ACTATTGTAAATATTTGACTGTTTAGCGGTATAACTTACAATTACAAAATTTAATCAAGTTTTATAA  
TCTAAATTTAAATGAGAATATTAATAAAGTCATTCATTATTAATAATTAGTGAATTCCTATCTTATCG  
ATGCGTCACAACCAAGTAATATTAGTTACTTATGAAATTTTGGTTCATTATTAGCTGTTTGTAAAT  
AGTACAAATTATTACAGGTATTACATTAGCTATGCATTATAGTCCTAGTGTAATGGAAGCCTTTA  
ATTCAATAGAACATATAATGAGAGATGTTAATAACGGATGATTAGTTCGTTATCTACATAGTAAT  
ACAGCCTCAGCATTCTTTTTCTTAGTGATTTACACATAGGTAGAGGTATATATTATGGATCATAT

AGAGCTCCTCGTACTTTAGTATGAGCTATTGGTACTGTAATACTTATATTAATGATGGCCATCGGT  
TTCTTAGGTTATGTTTTACCTTATGGACAAATGTCATTATGAGGTGCTACAGTTATTACTAATCTTA  
TTAGTGCTATCCCTGAATAGGACAAGATATTGTTGAATTTATTTGAGGAGGTTTTCTGTTAATA  
ATGCCACTTTAAACAGATTTTTGCATTACATTTGTATTACCTTTGTATTAGCTGCTTTAGTATTA  
ATGCACTTAATAGCACTTCACGATACAGCTGGTTCTAGTAACCCTCTAGGTGTTTCAGGTAATTA  
TGATAGAATTACATTTGCTCCATATTATTTATTTAAAGATTTAATTACTATTTTTATTTATATTG  
TATTAAGTGCATTTGTATTCTTTATGCCTAATGTTTTAGGGGATAGTGATAATTATATTATGGCTAA  
TCCTATGCCAACTCCTGCTGCTATTGTGCCTGAATGATTTTATTACCTTTCTATGCTATTTTAAGA  
TCTATACCTAATAAATTATTAGGAGTTATAGCTATGTTTAGTGCAATTTTAGCTATAATGTTATTAC  
CTGTTACAGATTTAGGTAGATCTAGAGGTTTACAATTTAGACCATTTAGTAAATAGCTTTCTGAG  
TTTTGTAGCTAATTTCTTAGTATTAATGCAATTAGGTGCTAAACACGTAGAAGATCCATTTATAT  
TATTAGGTCAATTAAGTACTGTTTTATACTTTAGTTACTTTGTAGCTATATTACCTTTAGCTAGTTA  
CTTAGATAATAGTTTAAACAGATTTATCTAATAAACCTGAATTATTATTAATAAACTAACTAAAT  
TTATTAAGATTATTATTTAATATATTTTCTATTTAAGATACTATTAATTTAGTATTTTGGGTTTTAG  
TTTATAATTTATATTATATTATGCATTACCCTCCACCTTGCTTTGTAGTAAGGTAATCCATTATTTT  
CTTTAGTTTAAATGGTAGAACAATGATCTTCTAATTCATTGGTTTTAGTTCGATTCTAAAAAGGAAA  
TAAGAAATAATTGATTATTATTACTTATATAATAATTATTTCTTAAAAATATACATTTTGCATTATA  
GCCGTTTAGCTGTATTAATAATGTAAATGATATAAAATAGAATCAATATTTAAATTATTCCTATGT  
TATATTACCCTATTTTACAGCCATTTTCAGAAGTTATATTAATACTTGTACCTGCCTTGTTAGCTGT  
AGCTTATGTTACAGTAGCTGAAAGAAAACTATGGCTAGTATGCAAAGAAGATTAGGTCTAAC  
GCTGTAGGTTATTATGGACTACTACAAGCATTTGCTGATGCCTTAAACTTTTATTAAGAATAT  
GTAGCTCCTACACAATCTAATATAGTTCTTTTCTTTTAGGTCCAGTTATTACTTTAATATTTGCAT  
TACTAGGTTATGCTGTTATACCATATGGACCTGGTTCAGGATTAAGCGATATGAATTTAGGTATC  
TTCTATATGTTAGCTGTGTCATCTTAGCTACATACGGTATTTTATTAGCCGGTTGAAGTGCTAAC  
AGTAAATATGCATTTCTAGGTTCTCTTAGAAGTACAGCTCAATTAATTAGTTATGAATTAATATTA  
AGTTCAGCCATATTAATAGTAATTATGATAACAGGAAATTTAAATTTAACTGTATGTACTGAATCT  
CAAAGAGCTGTTTGATTAATATTGCCATTATTTCTGTATTTATAATATTTTTATAGGATCTATAG  
CTGAAACAAATAGAGCTCCTTTTGATTTAGCCGAGGCTAACCTAATATTCTGGTTTGGTCTGGTT  
ATATGTCACAAATTGCTGGGAAACCTTTTTATTTAAAAACAAAAGACAATTAGCAGGAACTTA  
ATTTAACCTAATTAATAATATTAGATAATTAACCTCTTCATAGACTAAACGTGACAATTTAATATA  
TATATATATTTATTTATATATATGATTAAATAAGATATAGTCAATCATCGGTGTGAATCGACTTAA  
AAAAAAAGCACATGGGTTAAACCCATCTCCCCTTATTAGGGGAATCAGAACTTGTTAGTGGGT  
TTATGACAGAACATGCTGCCGTAGTTTTCGTATTCTTTTTTTAGCAGAATATGGTAGTATTGTATT  
AATGTGTATTTTAACTAGTATTTTATTTATAGGTGGTTACTTATTATTTGAAATATCATATGTTTTTA  
CTGTTGTAAATTATATTTCTTTGAATTATTTTTATAGACTGAGTAACATTTATAGAAATACAATC  
TTTATATACGGACTTTTTAAATAATTCTGTTATTGAAGGATTATTATATGGGTTTAAATTTAGGATTA  
AAAAGCTCTTTAATGATATTTACATTTATTTGAGCTAGAGCTTCTTCCCTAGAATACGATTTGAT  
CAATTAATGGCCTTCTGTTGAACAGTTTTATTACCTATTAATTTTGCTATAATTATTTTAGTACCTT  
GTGTATTATATAGTTTTAATTTATTACCAATTAACATCCCATTGTTCTAGCTCACACACCCGCCCG  
CCCTACTGCCACAAGGCTACAGTACATATGAGGAGGGGAACTAAAGATCTAGAACTATCCTAGT  
TAATAATTACACTTAATAGTATACTAAATAGACCATCTATCATACTCGAGAATAGTGATAGTGTA  
ATTATACACTATTTTAACTGTATTCTACACTATTAGCATATTATTATCTTTATATGATAATAATTTTA  
TAACCTAATTTATTAGGTTACATTAACAAAAAATTCGTTAACTTTTTCCACCACTTTTAAATACAAA  
ATACGAATTTTA

>R01-1

ATAACAATTCTAAAGAACATAAAGAGTTATTAGATAAAAAATAATTCACCTATACAGTTAATAAAT  
CAACTTAAAGGGTATTTTTTCATAAATCCTTTATTAGCTTTAAGTTTAGCTATTACTATTTCTCTTT  
TGCAGGTATTCCTCCTCTTGAGGGTCTTTGCTAAACAGATGGTATTAAGCGCGGCTATTGATC  
AAGGTTATATCTTTTTATCTTTAGTTGCAATATTAAGTAGTGTATAGGAGGGGTTTATTATTTAAA  
TATAATTAAGAAATGTTCTTTTATTCACCTGACTATAAATTAACGAAGAAATTAATAAATAATAC  
TATTAATGGTCAAATTATTAATAGAAACAATAAAATATTAATGTTGAATTAATTATACAAATGT  
AGTTATGTCTAGTTCTGTGGCAATAACTATTTCTACTATTACATTAGTAGTTTTATTATTCATGTTT  
ATGAATAAAGAATGATTAAGTCTGGGTACTATATTGGTACAATCTTTATTTAGCTATTAATGAGTA  
GTATGACATTATTTATAGGGTTTGTATCTGTTATAGCTATTTTATTTTAGCCATTAATTTATATTT  
GCTCCTCATAATCCTTATCAAGAAAAATATAGTATTTTCGAGTGTGGTTTCCATAGTTTTTTAGGG  
CAAAATAGAACACAATTCGGTATAAAATTCCTTTATTTTGTCTTAGTTTATTTACTTTTAGATTTAG  
AAATATTATTAACTTTCCCTTTTCGCTCTTAGTGAGTATGTTAATGGTATTTATGGTCTTTTAGTTAC  
TTTAATTTTATAGCTATAATAACTATAGGATTTATATTTGAATTAGGTAAAAGCGCTCTTAAATA  
GACAGCAGACAAAAATTATATATACCTAAATTGAACGTTAATTACCATACAGAGTATGTTGGAAT  
AGGTAAGGTTTCTAAGTAAAGTTATAGAGGCAGAAAACCAAAAAACCTACCAAAGGGTAGCTA  
ATGGGAAGCTATTAATAAATAAAGATGATAACCTATATATAGTATAGTTACTATATATTTACTATA  
ACTAGGATTATTATATATATATATATTATCTTATTGTATATTAAGATTATTATTATTATAAGGTATA  
ATTAATATAGTATCTTATTGTATAAGAATATAATATATTAACCTATAATTAATTTTATTTTAAATTT  
TTAATTATAATTTTTTTTTATATCTAGATGCTTACACATCTACAGATGTAGAAGAGAACAAAATAT  
TGTTGTTATAGTAGTGATATAGAAAAATATTTTTATATTATTTATTTTGTAGGTAGCTTTT  
GAAGTGTTTGATAGAGAGGATATATGGACGGTAGGAGGGTATTCATTTTAAATGAACAGTGGATA  
GTTTAAATTAACCTAGTTATAGTTTATGAATTTAAATTATAATTATATTAATGTAGGTATGATAGA  
ATTATGTATTGATCCTTAAGAGTTAAGAGAGATACGCCCACGTATAATACATATTGGTTTAGGGT  
TGAGTATATATACTTAAGAGTTAAGAATATATATATACAATATATAATAAATATAGTAATATATTA  
ATGGTATGGACTTAACCAGGTTTATATATTATCATTGATAAACATTAATTATAATTTTCTATTTA  
TTATTATTATTATACTGTGAGATTAATAATTATTAATAATATAATATTACATAGTACGTGATATTTGG  
GGATTTTATCTTATTAATTGGCAATTAATGATTCTAATCAAATTTTATTCTCTTAGTTTAAATGGTA  
GAACAATGATCTTCTAATTCATTGGTTTTAGTTTCGATTCTAAAAAGAGATGAGTAAATAATTTTCT  
AGATCAGAAATACTACTTTTAACTACAAAAGCTTACGCTTTTAAACATTTTTTGTAAATAACA  
ACTATTGTTAATATTTGGCTGTCTATTGGTTTAACTACAATTACAAAATTTTTCAATTTTTATAAT  
ATAAATTTAAATGAGAATATTAATAAAGTCATTCATTATTAATAAATTAGTGAATTCTACCTTATCGA  
TGCGTCACAACCAAGTAACATTAGTTACTTGTGAAATTTTGGTTCATTATTAGCTGTTTGTAAAT  
AGTACAAATTATTACCGGTATTACATTAGCTATGCATTATAGTCCTAGTGAATGGAAGCTTTTAA  
CTCAATAGAGCATATAATGAGAGATGTTAATAACGGGTGATTAGTTCGTTATCTACATAGTAATA  
CAGCTTCTGCTTTCTTTTCTTAGTGATTTACACATAGGAAGAGGTATATATTACGGATCATATA  
GAGCTCCTCGTACTTTAGTTTGAGCTATTGGTACTGTTATATTAATTAATGATGGCTATCGGTT  
TCCTAGGTTATGTTTTACCTTATGGACAGATGTCATTATGAGGTGCTACAGTTATTACTAATCTTA  
TTAGTGCTATACCTGAATAGGGCAAGATATTGTTGAATTCATTTGAGGTGGTTTTTCTGTAAATA  
ATGCCACTTTAAACAGATTTTTTGCAATTACATTTGTATTGCCTTTGTATTAGCTGCTTTAGTTTA  
ATGCACTTAATTGCACTTCATGATACTGCTGGTTCAAGCAATCCTCTTGGTGTTTCAGGTAATTAC  
GATAGAATTACATTTGCTCCATATTTTTATTTAAAGATTTAATTACTATTTTTATATTTATTTTGT  
TTAAGTGCTTTGTATTCTTTATGCCTAATGTTTTAGGGGATAGTGATAATTATATTATGGCTAATC  
CTATGCAAACCTCCTGCTGCTATTGTACCTGAATGATACTTATTACCTTTCTATGCTATTTTAAGATC

TATACCTAATAAATTATTAGGTGTTATAGCGATGTTTAGTGCTATTTTAGCTATTATGTTATTACCT  
GTTACAGATTTAGGTAGATCTAGAGGTTTACAATTTAGACCATTTAGTAAAATAGCTTTCTGAGTT  
TTTGTTGCTAATTTCTTAGTTTTAATGCAATTAGGTGCTAAACACGTTGAAGATCCATTTATATTAT  
TAGGTCAATTAAGTACTGTATTATACTTTAGTTATTTTGTGCTATATTACCTTTAGCTAGTTACTT  
AGATAATAGTTTAACTGATTTATCTAATAAATCTGAATTATTTTAAATAAACTAACTAAATATAT  
TAAGATTATTATTTAATATATTTTCTATTTAAGATACTATTAATTTAGTATTTTGGGTTTTCAGTTTA  
TAATTTATATTATATTATGCATTACCCTCCACCTTGCTTTGTAGTAAGCTAATCTGTTATTTCTTTA  
GTTTAATGGTAGAACAATGATCTTCTAATTCATTGGTTTTAGTTCGAATCTAAAAAGGAAATAAG  
AAATATATTCTTATTATTACTTATATAATAATTATTTCTTAAAAATATACATTTTGCATTATAGCCGT  
TTAGCTGTATTTAAATGTAAATGATATAAAATAGAATAAATATTTAAATTATTCCTATGTTATATT  
ATCCTATATTGCAACCATTATCAGAAGTTGTATTAATACTTGTACCTGCCTTATTAGCTGTAGCTT  
ATGTTACAGTTGCTGAAAGAAAACTATGGCTAGTATGCAAAGAAGATTAGGTCCTAATGCTGT  
AGGTTACTATGGACTATTGCAAGCATTTGCTGATGCCTTAAACTTTTTATTAAAGAATATGTAG  
CTCCTACACAATCTAATATTGTTCTTTTCTTTTAGGTCCTGTAATAACTTTAATTTTTGCATTATTA  
GGTTACGCTGTTATACCCTATGGTCCTGGTTCAGGGATAAGCGACATGAATTTAGGTATATTTTA  
CATGTTAGCTGTGTCATCTTTAGCTACATACGGTATTCTATTAGCTGGTTGAAGTGCGAATAGTA  
AATACGCTTTTCTAGGTTCTCTTAGAAGTACAGCTCAATTAATTAGTTATGAATTAATTAAGTT  
CAGCTATATTAATAGTAATTATGATAACAGGAAATTTAAATTTAACTGTTTGTACTGAATCTCAAA  
GAGCTATTTGATTTATACTACCTTTATTTCTGTGTTTATAATATTTTTCATAGGATCTATAGCTGA  
GACAAATAGAGCTCCTTTTGATTTAGCCGAGGCTAACCTGCTAATCTGGTTTGGTCTGGTTATAT  
GTCACAAATTGCTAGGAAACCTTTTTATTTTAAAAACAAAAGACAATTAGCAGGAACTTAATTT  
AACCTAATTAATAAATATTAGATAATTAACTCTTCATAGACTAAACGTGACAATTTAATATATATA  
TATATTTATTTATATATATGATTAATAAGATATAGTCAATCATCGGTGTGAATCGACTTAAAAAA  
AAAAGCACATGGGTAAACCCATCTCCCCTTATTAGGGGAATCAGAACTTGTTAGTGGGTTTCAT  
GACAGAGCATGCTGCCGTAGTTTTCGTATTCTTCTTTTAGCTGAGTACGGTAGTATTGTACTAAT  
GTGTATTTTAACTAGTATATTATTTATTGGTGGTTACTTATTATTTGAAATATCCTATGTTTTACTG  
TGGTAAATTATATTTTCTTTGAATTATTCTTTATAGACTGAGTAACATTTGTAGAGGTACAATCTTT  
ATACACTGATTTTTTAAATAATTCTATCATTGAAGGATTATTATATGGGTTTAACTAGGATTAAA  
AAGTTCTTTAATGATATTCACATTTATTTGAGCTAGAGCATCCTTCCCTAGAATACGATTTGATCA  
ACTAATGGGCTTCTGTTGAACAGTTTTATTACCTATTAATTTTGCAATTATTATATTAGTACCTTGT  
GTTTTATATAGTTTTAACTTATTACCTGTAAATATACCATTGTTCTAGCTCACACACCCGCCGCC  
CTACTGCCACAAGGCTACAGTACATATGAGGAGGGGAATAAGATCTAGAACTATCCTAGTTA  
ATAATTACACTTAATAGTATACTAAATAGACCATCTATCATACTCGAGAATAGTGATAGTGTAAT  
TATACACTATTTTAACTGTATTCTACACTATTAGCATATTATTATCTTTATATGATAATAATTTTATA  
ACTTAATTTATTAGGTTACATTAACAAAAAATTCGTTAACTTTTTTCACCACTTTTAAATACAAAAT  
ACGAATTTTA

>S1

ATAACAATTCTAAAGAACATAAAGAGTTATTAGATAAAAAATAATTCACCTATACAGTTAATAAAT  
CAACTTAAAGGGTATTTTTTCATAAATCCTTTATTAGCTTTAAGTTTAGCTATTACTATTTTCTCTTT  
TGCAGGTATTCCTCCTCTGTAGGGTTCTTTGCTAAACAGATGGTATTAAGCGCGGCTATTGATC  
AAGGTTATATCTTTTATCTTTAGTTGCAATATTAAGTGTATAGGAGGGGTTTATTATTTAAA  
TATAATTAAGAAATGTTCTTTTATTCACCTGACTATAAATTAACGAAGAAATTAATAAATAC  
TATTAATGGTCAAATTATTAATAGAAACAATAAAATATTAATGTTGAATTTAATTATACAAATGT  
AGTTATGTCTAGTTCTGTGGCAATAACTATTTCTACTATTACATTAGTAGTTTTATTATTCATGTTT

ATGAATAAAGAATGATTAAGTCTGGGTACTATATTGGTACAATCTTTATTTAGCTATTAATGAGTA  
GTATGACATTATTTATAGGGTTTGTATCTGTTATAGCTATTTTATTTTATAGCCATTAATTTTATATTT  
GCTCCTCATAATCCTTATCAAGAAAAATATAGTATTTTCGAGTGTGGTTTCCATAGTTTTTATAGG  
CAAAATAGAACACAATTCGGTATAAAATTCCTTATTTTTCGTTTATTTACTTTTATAGATTTAG  
AAATATTATTAACCTTCCCTTTCGCTCTTAGTGAGTATGTTAATGGTATTTATGGTCTTTTATGTTAC  
TTTAATTTTATAGCTATAATAACTATAGGATTTATATTTGAATTAGGTAAAAGCGCTCTTAAATA  
GACAGCAGACAAAAATTATATATACCTAAATTGAACGTTAATTACCATACAGAGTATGTTGGAAT  
AGGTAAGGTTTCTAAGTAAAGTTATAGAGGCAGAAAACCAAAAAACCTACCAAAGGGTAGCTA  
ATGGGAAGCTATTAATAAATAAAGATGATAACCTATATATAGTATAGTTACTATATATTTACTATA  
ACTAGGATTATTATATATATATATATTATCTTATTGTATATTAAGATTATTATTATTATAAGGTATA  
ATTAATATAGTATCTTATTGTATAAGAATATAATATATTAACCTATAATTAATTTTATTTTAAATTT  
TTAATTATAATTTTTTTTTTATATCTAGATGCTTACACATCTACAGATGTAGAAGAGAACAAAATAT  
TGTTGTTATAGTAGTGGATGATATAGAAAAATATTTTATATTATTTATTTTGTAGGTAGCTTTT  
GAAGTGTGATAGAGAGGATATATGGACGGTAGGAGGGTATTCATTTTAAATGAACAGTGGATA  
GTTTAAATTAACCTAGTTATAGTTTATGAATTTAAATTATAATTATATTAATGTAGGTATGATAGA  
ATTATGTATTGATCCTTAAGAGTTAAGAGAGATACGCCACGTATAATACATATTGGTTTAGGGT  
TGAGTATATATACTTAAGAGTTAAGAATATATATATACAATATATAATAAATATAGTAATATATTA  
ATGGTATGGACTTAACCAGGTTTATATATTATCATTTGATAAACATTAATTATAATTTTCTATTTA  
TTATTATTATTACTGTGAGATTAATAATTATTAATAATATTACATAGTACGTGATATTTGG  
GGATTTTATCTTATTAATTGGCAATTAATGATTCTAATCAAATTTTATTCTCTTTAGTTTAAATGGTA  
GAACAATGATCTTCTAATTCATTGGTTTTAGTTTCGATTCTAAAAAGAGATGAGTAAATAATTTTCT  
AGATCAGAAATACTACTTTTAACTACAAAAAGCTTACGCTTTTAAACATTTTTTTGATAAATAACA  
ACTATTGTTAATATTTGGCTGTCTATTGGTTTAACTACAATTACAAAATTTTTCAATTTTATAAT  
ATAAATTTAAATGAGAATATTAATAAAGTCATTCAATTATTAATAATTAGTGAATTCTTACCTTATCGA  
TGCGTCACAACCAAGTAACATTAGTTACTTGTGAAATTTTGGTTCATTATTAGCTGTTTGTTAAT  
AGTACAAATTATTACCGGTATTACATTAGCTATGCATTATAGTCCTAGTGTAATGGAAGCTTTTAA  
CTCAATAGAGCATATAATGAGAGATGTTAATAACGGGTGATTAGTTCGTTATCTACATAGTAATA  
CAGCTTCTGCTTTCTTTTCTTAGTGATTATACACATAGGAAGAGGTATATATTACGGATCATATA  
GAGCTCCTCGTACTTTAGTTTGAGCTATTGGTACTGTTATATTAATTAATGATGGCTATCGGT  
TCCTAGGTATGTTTTACCTTATGGACAGATGTCATTATGAGGTGCTACAGTTATTACTAATCTTA  
TTAGTGCTATACCTGAATAGGGCAAGATATTGTTGAATTCATTTGAGGTGGTTTTCTGTTAATA  
ATGCCACTTTAAACAGATTTTTGCATTACATTTGTATTGCCTTTGTATTAGCTGCTTTAGTTTA  
ATGCACTTAATTGCACTTCATGATACTGCTGGTTCAAGCAATCCTCTTGGTGTTTACAGGTAATTAC  
GATAGAATTACATTTGCTCCATATTATTTATTAAGATTTAATTACTATTTTATATTTATTTTGT  
ATTAAGTGCTTTTGTATTCTTTATGCCTAATGTTTTAGGGGATAGTGATAATTATATTATGGCTAAT  
CCTATGCAAACCTCTGCTGCTATTGTACCTGAATGATACTTATTACCTTTCTATGCTATTTAAGAT  
CTATACCTAATAAATTATTAGGTGTTATAGCGATGTTTAGTGCTATTTTATAGCTATTATGTTATTACC  
TGTTACAGATTTAGGTAGATCTAGAGGTTTACAATTTAGACCATTTAGTAAAATAGCTTTCTGAGT  
TTTTGTTGCTAATTTCTTAGTTTTAATGCAATTAGGTGCTAAACACGTTGAAGATCCATTTATATTA  
TTAGGTCAATTAAGTACTGTATTATACTTTAGTTATTTGTTGCTATATTACCTTTAGCTAGTTACTT  
AGATAATAGTTTAACTGATTTATCTAATAAATCTGAATTATTTTAAATAAACTAACTAAATATAT  
TAAGATTATTATTAATATATTTTCTATTTAAGATACTATTAATTTAGTATTTTGGGTTTTAGTTTA  
TAATTTATATTATATTATGCATTACCTCCACCTTGCTTTGTAGTAAGCTAATCTGTTATTTCTTTA  
GTTAATGGTAGAACAATGATCTTCTAATTCATTGGTTTTAGTTTGAATCTAAAAAGGAAATAAG

AAATATATTCTTATTATTACTTATATAATAATTATTTCTTAAAAATATACATTTTGCATTATAGCCGT  
TTAGCTGTATTAAAATGTAAAATGATATAAAATAGAATAAAATATTTAAATTATTCCTATGTTATATT  
ATCCTATATTGCAACCATTATCAGAAGTTGTATTAATACTTGTACCTGCCTTATTAGCTGTAGCTT  
ATGTTACAGTTGCTGAAAGAAAACTATGGCTAGTATGCAAAGAAGATTAGGTCCTAATGCTGT  
AGGTTACTATGGACTATTGCAAGCATTTGCTGATGCCTTAAAACTTTTATTAAGAATATGTAG  
CTCCTACACAATCTAATATTGTTCTTTTCTTTTAGGTCCTGTAATAACTTTAATTTTGCATTATTA  
GGTTACGCTGTTATACCCTATGGTCCTGGTTCAGGGATAAGCGACATGAATTTAGGTATATTTTA  
CATGTTAGCTGTGTCATCTTTAGCTACATACGGTATTCTATTAGCTGGTTGAAGTGCGAATAGTA  
AATACGCTTTTCTAGGTTCTCTTAGAAGTACAGCTCAATTAATTAGTTATGAATTAATATTAAGTT  
CAGCTATATTAATAGTAATTATGATAACAGGAAATTTAAATTTAACTGTTTGTACTGAATCTCAAA  
GAGCTATTTGATTTATACTACCTTTATTTCTGTGTTTATAATATTTTTCATAGGATCTATAGCTGA  
GACAAATAGAGCTCCTTTTGATTTAGCCGAGGCTAACCTGCTAATCTGGTTTGGTCTGGTTATAT  
GTCACAAATTGCTAGGAAACCTTTTTATTTAAAAACAAAAGACAATTAGCAGGAAACTTAATTT  
AACCTAATTAATAATTAGATAATTAACCTCTTCATAGACTAAACGTGACAATTTAATATATATA  
TATATTTATTTATATATATGATTAATAAGATATAGTCAATCATCGGTGTGAATCGACTTAAAAAA  
AAAAGCACATGGGTAAACCCATCTCCCTTATTAGGGGAATCAGAACTTGTTAGTGGGTTTCAT  
GACAGAGCATGCTGCCGTAGTTTTCGTATTCTTCTTTTAGCTGAGTACGGTAGTATTGTACTAAT  
GTGTATTTTAACTAGTATATTATTTATTGGTGGTTACTTATTATTTGAAATATCCTATGTTTTACTG  
TGGTAAATTATATTTTCTTTGAATTATTCTTTATAGACTGAGTAACATTTGTAGAGGTACAATCTTT  
ATACACTGATTTTTTAAATAATTCTATCATTGAAGGATTATTATATGGGTTTAACTAGGATTA  
AAGTTCTTTAATGATATTCACATTTATTTGAGCTAGAGCATCCTTCCCTAGAATACGATTTGATCA  
ACTAATGGGCTTCTGTTGAACAGTTTTATTACCTATTAATTTTGCAATTATTATATTAGTACCTTGT  
GTTTTATATAGTTTTAACTTATTACCTGTAAATATACCATTGTTCTAGCTCACACACCCGCCGCC  
CTACTGCCACAAGGCTACAGTACATATGAGGAGGGGAATAAGATCTAGAATACTATCCTAGTTA  
ATAATTACACTTAATAGTATACTAAATAGACCATCTATCATACTCGAGAATAGTGATAGTGTAAT  
TATACACTATTTTAACTGTATTCTACACTATTAGCATATTATTATCTTTATATGATAATAATTTTATA  
ACTTAATTTATTAGGTTACATTAACAAAAAATTCGTTAACTTTTTTCACCACTTTTAAACAAAAT  
ACGAATTTTA

>Su-1

ATAACAATTCTAAAGAACATAAAGAGTTATTAGATAAAAAATAATTCACCTATACAGTTAATAAAT  
CAACTTAAAGGGTATTTTTTCATAAATCCTTTATTAGCTTTAAGTTTAGCTATTACTATTTTCTCTTT  
TGCAGGTATTCTCCTCTTGTAGGGTTCTTTGCTAAACAGATGGTATTAAGCGCGGCTATTGATC  
AAGGTTATATCTTTTATCTTTAGTTGCAATATTAAGTGTATAGGAGGGGTTTATTATTTAAA  
TATAATTAAGAAATGTTCTTTTATTCACCTGACTATAAATTAACGAAGAAATTAATAATAC  
TATTAATGGTCAAATTATTAATAGAAACAATAAAATATTAATGTTGAATTTAATTATACAAATGT  
AGTTATGTCTAGTTCTGTGGCAATAACTATTTCTACTATTACATTAGTAGTTTTATTATTCATGTTT  
ATGAATAAAGAATGATTAAGTCTGGGTACTATATTGGTACAATCTTTATTTAGCTATTAATGAGTA  
GTATGACATTATTTATAGGGTTGTATCTGTTATAGCTATTTTATTTTAGCCATTAATTTATATTT  
GCTCCTCATAATCCTTATCAAGAAAAATATAGTATTTTCGAGTGTGGTTCCATAGTTTTTTAGGG  
CAAAATAGAACACAATTCGGTATAAAATCTTTATTTTGCTTTAGTTTATTTACTTTTAGATTTAG  
AAATATTATTAACTTTCCCTTTCGCTCTTAGTGAGTATGTTAATGGTATTTATGGTCTTTTAGTTAC  
TTTAATTTTATAGCTATAATAACTATAGGATTTATATTTGAATTAGGTAAAAGCGCTCTTAAATA  
GACAGCAGACAAAATTATATATACCTAAATTGAACGTTAATTACCATACAGAGTATGTTGGAAT  
AGGTAAGGTTTCTAAGTAAAGTTATAGAGGCAGAAAACCAAAAAACCTACCAAGGGTAGCTA

ATGGGAAGCTATTA AAAAATAAAAGATGATAACCTATATATAGTATAGTTACTATATATTTACTATA  
ACTAGGATTATTATATATATATATATTATCTTATTGTATATTAAGATTATTATTATTATAAGGTATA  
ATTAATATAGTATCTTATTGTATAAGAATATAATATATTAACCTATAATTAATTTTATTTTTAATTT  
TTAATTATAATTTTTTTTTTATATCTAGATGCTTACACATCTACAGATGTAGAAGAGAACAAAATAT  
TGTTGTTATAGTAGTGGATGATATAGAAAAATATTTTTATATTATTTATTTTTGTTAGGTAGCTTTT  
GAAGTGTTTGATAGAGAGGATATATGGACGGTAGGAGGGTATTCATTTTAATGAACAGTGGATA  
GTTTAAATTAACCTAGTTATAGTTTATGAATTTAAATTATAATTATATTAATGTAGGTTATGATAGA  
ATTATGTATTGATCCTTAAGAGTTAAGAGAGATACGCCACGTATAATACATATTGGTTTAGGGT  
TGAGTATATATACTTAAGAGTTAAGAATATATATATACAATATATAATAAATATAGTAATATATTA  
ATGGTATGGACTTAACCGGTTTATATATTATCATTTGATAAACATTAATTATAATTTTTCTATTTA  
TTATTATTATTACTGTGAGATTAATAATTATTA AAAATATAATATTACATAGTACGTGATATTTGG  
GGATTTTATCTTATTAATTGGCAATTAATGATTCTAATCAAATTTTATTCTCTTTAGTTTAATGGTA  
GAACAATGATCTTCTAATTCATTGGTTTTAGTTTCGATTCTAAAAAGAGATGAGTAAATAATTTTCT  
AGATCAGAAATACTACTTTTAACTACAAAAAGCTTACGCTTTTAAACATTTTTTTGATAAATAACA  
ACTATTGTTAATATTTGGCTGTCTATTGGTTTAACTAACAATTACAAAATTTTTCAATTTTTATAAT  
ATAAATTTAAATGAGAATATTA AAAAGTCATTCATTATTA AAAATTAGTGAATTCCTACCTTATCGA  
TGCGTCACAACCAAGTAACATTAGTTACTTGTGAAATTTTGGTTCATTATTAGCTGTTTGTTAAT  
AGTACAAATTATTACCGGTATTACATTAGCTATGCATTATAGTCCTAGTGAATGGAAGCTTTTAA  
CTCAATAGAGCATATAATGAGAGATGTTAATAACGGGTGATTAGTTCGTTATCTACATAGTAATA  
CAGCTTCTGCTTTCTTTTTCTTAGTGTATTTACACATAGGAAGAGGTATATATTACGGATCATATA  
GAGCTCCTCGTACTTTAGTTTGAGCTATTGGTACTGTTATATTAATTAATGATGGCTATCGGTT  
TCCTAGGTTATGTTTTACCTTATGGACAGATGTCATTATGAGGTGCTACAGTTATTACTAATCTTA  
TTAGTGCTATACCTGAATAGGGCAAGATATTGTTGAATTCATTTGAGGTGGTTTTCTGTTAATA  
ATGCCACTTTAAACAGATTTTTTGCAATTACATTTGTATTGCCTTTTGTATTAGCTGCTTTAGTTTA  
ATGCACTTAATTGCACTTCATGATACTGCTGGTTCAAGCAATCCTCTGGTGTTTCAGGTAATTAC  
GATAGAATTACATTTGCTCCATATTATTTATTTAAAGATTTAATTACTATTTTTATATTTATTTTGT  
ATTAAGTGCTTTTGTATTCTTTATGCCTAATGTTTTAGGGGATAGTGATAATTATATTATGGCTAAT  
CCTATGCAAACCTCTGCTGCTATTGTACCTGAATGATACTTATTACCTTTCTATGCTATTTTAAGAT  
CTATACCTAATAAATTATTAGGTGTTATAGCGATGTTTAGTGCTATTTTAGCTATTATGTTATTACC  
TGTTACAGATTAGGTAGATCTAGAGGTTACAATTTAGACCATTAGTAAAATAGCTTTCTGAGT  
TTTTGTTGCTAATTTCTTAGTTTTAATGCAATTAGGTGCTAAACACGTTGAAGATCCATTTATATTA  
TTAGGTCAATTAAGTACTGTATTATACTTTAGTTATTTTGTGCTATATTACCTTTAGCTAGTTACTT  
AGATAATAGTTTAACTGATTTATCTAATAAATCTGAATTATTTTAAATAAACTAACTAAATATAT  
TAAGATTATTATTTAATATATTTTCTATTTAAGATACTATTAATTTAGTATTTTGGGTTTTCAGTTTA  
TAATTTATATTATATTATGCATTACCCTCCACCTTGCTTTGTAGTAAGCTAATCTGTTATTTCTTTA  
GTTTAATGGTAGAACAATGATCTTCTAATTCATTGGTTTTAGTTTGAATCTAAAAAGGAAATAAG  
AAATATATTCTTATTATTACTTATATAATAATTATTTCTTAAAAATATACATTTTGCATTATAGCCGT  
TTAGCTGTATTAAATGTAAATGATATAAAATAGAATAAATATTTAAATTATTCCTATGTTATATT  
ATCCTATATTGCAACCATTATCAGAAGTTGTATTAATACTTGTACCTGCCTTATTAGCTGTAGCTT  
ATGTTACAGTTGCTGAAAGAAAACTATGGCTAGTATGCAAAGAAGATTAGGTCCTAATGCTGT  
AGGTTACTATGGACTATTGCAAGCATTTGCTGATGCCTTAAACTTTTATTAAGAATATGTAG  
CTCCTACACAATCTAATATTGTTCTTTTCTTTTAGGTCCTGTAATAACTTTAATTTTTGCATTATTA  
GGTTACGCTGTTATACCCTATGGTCCTGGTTCAGGGATAAGCGACATGAATTTAGGTATATTTTA  
CATGTTAGCTGTGTCATCTTTAGCTACATACGGTATTCTATTAGCTGGTTGAAGTGCGAATAGTA

AATACGCTTTTCTAGGTTCTCTTAGAAGTACAGCTCAATTAATTAGTTATGAATTAATATTAAGTT  
CAGCTATATTAATAGTAATTATGATAACAGGAAATTTAAATTTAACTGTTTGTACTGAATCTCAAA  
GAGCTATTTGATTTATACTACCTTTATTTCCCTGTGTTTATAATATTTTTCATAGGATCTATAGCTGA  
GACAAATAGAGCTCCTTTTGATTTAGCCGAGGCTAACCTGCTAATCTGGTTTGGTCTGGTTATAT  
GTCACAAATTGCTAGGAAACCTTTTTATTTTAAAAACAAAAGACAATTAGCAGGAAACTTAATTT  
AACCTAATTAATAATATTAGATAATTAACTCTTCATAGACTAAACGTGACAATTTAATATATATA  
TATATTTATTTATATATATGATTAAATAAGATATAGTCAATCATCGGTGTGAATCGACTTAAAAAA  
AAAAGCACATGGGTAAACCCATCTCCCCTTATTAGGGGAATCAGAACTTGTTAGTGGGTTTCAT  
GACAGAGCATGCTGCCGTAGTTTTCGTATTCTTCTTTTGTAGCTGAGTACGGTAGTATTGTACTAAT  
GTGTATTTTAACTAGTATATTATTTATTGGTGGTTACTTATTATTTGAAATATCCTATGTTTTTACTG  
TGGTAAATTATATTTTCTTTGAATTATTCTTTATAGACTGAGTAACATTTGTAGAGGTACAATCTTT  
ATACACTGATTTTTTAAATAATTCTATCATTGAAGGATTATTATATGGGTTTAACTAGGATTA  
AAGTTCTTTAATGATATTCACATTTATTTGAGCTAGAGCATCCTTCCCTAGAATACGATTTGATCA  
ACTAATGGGCTTCTGTTGAACAGTTTTATTACCTATTAATTTTGCAATTATTATATTAGTACCTTGT  
GTTTTATATAGTTTTAACTTATTACCTGTAAATATACCATTGTTCTAGCTCACACACCCGCCGCC  
CTACTGCCACAAGGCTACAGTACATATGAGGAGGGGAATAAGATCTAGAATACTATCCTAGTTA  
ATAATTACACTTAATAGTATACTAAATAGACCATCTATCATACTCGAGAATAGTGATAGTGTAAT  
TATACACTATTTTAACTGTATTCTACACTATTAGCATATTATTATCTTTATATGATAATAATTTTATA  
ACTTAATTTATTAGGTTACATTAACAAAAAATTCGTTAACTTTTTTCACCACTTTTTAATACAAAAT  
ACGAATTTTA

>T-3

ATAACAATTCTAAAGAACATAAAGAGTTATTAGATAAAAAATAATTCACCTATACAGTTAATAAAT  
CAACTTAAAGGGTATTTTTTCATAAATCCTTTATTAGCTTTAAGTTTAGCTATTACTATTTTCTCTTT  
TGCAGGTATTCTCCTCTTGTAGGGTCTTTGCTAAACAGATGGTATTAAGCGCGGCTATTGATC  
AAGGTTATATCTTTTTATCTTTAGTTGCAATATTAAGTGTATAGGAGGGGTTTATTATTTAAA  
TATAATTAAGAAATGTTCTTTTATTCACCTGACTATAAATTAACGAAGAAATTAATAAATAC  
TATTAATGGTCAAATTATTAATAGAAACAATAAAATATTAATGTTGAATTTAATTATACAAATGT  
AGTTATGTCTAGTTCTGTGGCAATAACTATTTCTACTATTACATTAGTAGTTTTATTATTCATGTTT  
ATGAATAAAGAATGATTAAGTCTGGGTACTATATTGGTACAATCTTTATTTAGCTATTAATGAGTA  
GTATGACATTATTTATAGGGTTGTATCTGTTATAGCTATTTTATTTTGTAGCCATTAATTTATATTT  
GCTCCTCATAATCCTTATCAAGAAAAATATAGTATTTTCGAGTGTGGTTTCCATAGTTTTTTAGGG  
CAAAATAGAACACAATTCGGTATAAAATTCCTTTATTTTGTCTTAGTTTATTTACTTTTAGATTTAG  
AAATATTATTAACTTTCCCTTTCGCTCTTAGTGAGTATGTTAATGGTATTTATGGTCTTTTAGTTAC  
TTTAATTTTTTATAGCTATAATAACTATAGGATTTATATTTGAATTAGGTAAAAGCGCTCTTAAATA  
GACAGCAGACAAAAATTATATATACCTAAATTGAACGTTAATTACCATACAGAGTATGTTGGAAT  
AGGTAAGGTTTCTAAGTAAAGTTATAGAGGCAGAAAACCAAAAAACCTACCAAAGGGTAGCTA  
ATGGGAAGCTATTAATAAATAAAGATGATAACCTATATATAGTATAGTTACTATATATTTACTATA  
ACTAGGATTATTATATATATATATATTATCTTATTGTATATTAAGATTATTATTATAAGGTATA  
ATTAATATAGTATCTTATTGTATAAGAATATAATATATTAACCTATAATTAATTTTATTTTTAATTT  
TTAATTATAATTTTTTTTTATATCTAGATGCTTACACATCTACAGATGTAGAAGAGAACAAAATAT  
TGTTGTTATAGTAGTGATGATATAGAAAAATATTTTTATATTATTTATTTTGTAGGTAGCTTTT  
GAAGTGTTGATAGAGAGGATATATGGACGGTAGGAGGGTATTCATTTTAATGAACAGTGGATA  
GTTTAAATTAACCTAGTTATAGTTTATGAATTTAAATTATAATTATTAATGTAGGTTATGATAGA  
ATTATGTATTGATCCTTAAGAGTTAAGAGAGATACGCCACGTATAATACATATTGGTTTAGGGT

TGAGTATATATACTTAAGAGTTAAGAATATATATATACAATATATAATAAATATAGTAATATATTA  
ATGGTATGGACTTAACCAGGTTTATATATTATCATTTGATAAACATTAATTATAATTTTTCTATTTA  
TTATTATTATTATACTGTGAGATTAATAATTATTAATAATATTACATAGTACGTGATATTTGG  
GGATTTTATCTTATTAATTGGCAATTAATGATTCTAATCAAATTTTATTCTCTTTAGTTTAAATGGTA  
GAACAATGATCTTCTAATTCATTGGTTTTAGTTCGATTCTAAAAAGAGATGAGTAAATAATTTTCT  
AGATCAGAAATACTACTTTTAACTACAAAAAGCTTACGCTTTTTAACATTTTTTGATAAATAACA  
ACTATTGTTAATATTTGGCTGTCTATTGGTTTAACTAACAATTACAAAATTTTTCAATTTTTATAAT  
ATAAATTTAAATGAGAATATTAATAAGTCATTCAATTATTAATAATTAGTGAATCTTACCTTATCGA  
TGCGTCACAACCAAGTAACATTAGTTACTTGTGAAATTTTGGTTCATTATTAGCTGTTTGTTAAT  
AGTACAAATTATTACCGGTATTACATTAGCTATGCATTATAGTCCTAGTGAATGGAAGCTTTTAA  
CTCAATAGAGCATATAATGAGAGATGTTAATAACGGGTGATTAGTTCGTTATCTACATAGTAATA  
CAGCTTCTGCTTTCTTTTTCTTAGTGTATTTACACATAGGAAGAGGTATATATTACGGATCATATA  
GAGCTCCTCGTACTTTAGTTTGAGCTATTGGTACTGTTATTAATTAATGATGGCTATCGGTT  
TCCTAGGTTATGTTTTACCTTATGGACAGATGTCATTATGAGGTGCTACAGTTATTACTAATCTTA  
TTAGTGCTATACCTGAATAGGGCAAGATATTGTTGAATTCATTGAGGTGGTTTTCTGTTAATA  
ATGCCACTTTAAACAGATTTTTGCATTACATTTGTATTGCCTTTGTATTAGCTGCTTAGTTTTA  
ATGCACTTAATTGCACTTCATGATACTGCTGGTTCAAGCAATCCTCTTGGTGTTTCAGGTAATTAC  
GATAGAATTACATTTGCTCCATATTTTTATTTAAAGATTTAATTACTATTTTTATTTATTTTTGTA  
TTAAGTGCTTTTGATTCTTTATGCCTAATGTTTTAGGGGATAGTGATAATTATATTATGGCTAATC  
CTATGCAAACCTCCTGCTGCTATTGTACCTGAATGATACTTATTACCTTTCTATGCTATTTAAGATC  
TATACCTAATAAATTATTAGGTGTTATAGCGATGTTTAGTGCTATTTAGCTATTATGTTATTACCT  
GTTACAGATTTAGGTAGATCTAGAGGTTTACAATTTAGACCATTTAGTAAATAGCTTTCTGAGTT  
TTTGTTGCTAATTTCTTAGTTTTAATGCAATTAGGTGCTAAACACGTTGAAGATCCATTATATTAT  
TAGGTCAATTAAGTACTGTATTATACTTTAGTTATTTTTGTTGCTATATTACCTTTAGCTAGTTACTT  
AGATAATAGTTTAACTGATTTATCTAATAAATCTGAATTATTTTAAATAAACTAACTAAATATAT  
TAAGATTATTATTTAATATATTTTCTATTTAAGATACTATTAATTTAGTATTTTGGGTTTTAGTTTA  
TAATTTATATTATATTATGCATTACCCTCCACCTTGCTTTGTAGTAAGCTAATCTGTTATTTCTTTA  
GTTTAATGGTAGAACAATGATCTTCTAATTCATTGGTTTTAGTTCGAATCTAAAAAGGAAATAAG  
AAATATATTCTTATTATTACTTATATAATAATTATTTCTTAAAAATATACATTTTGCATTATAGCCGT  
TTAGCTGTATTAAATGTAAATGATATAAAATAGAATAAATATTTAAATTATTCCTATGTTATATT  
ATCCTATATTGCAACCATTATCAGAAGTTGATTAATACTTGTACCTGCCTTATTAGCTGTAGCTT  
ATGTTACAGTTGCTGAAAGAAAACTATGGCTAGTATGCAAAGAAGATTAGGTCCTAATGCTGT  
AGGTTACTATGGACTATTGCAAGCATTTGCTGATGCCTTAAACTTTTTATTAAGAATATGTAG  
CTCCTACACAATCTAATATTGTTCTTTCTTTTAGGTCCTGTAATAACTTTAATTTTTGCATTATTA  
GGTTACGCTGTTATACCCTATGGTCCTGGTTCAGGGATAAGCGACATGAATTTAGGTATATTTTA  
CATGTTAGCTGTGTCATCTTTAGCTACATACGGTATTCTATTAGCTGGTTGAAGTGCGAATAGTA  
AATACGCTTTTCTAGGTTCTCTTAGAAGTACAGCTCAATTAATTAGTTATGAATTAATTAAGTT  
CAGCTATATTAATAGTAATTATGATAACAGGAAATTTAAATTTAACTGTTTGTACTGAATCTCAAA  
GAGCTATTTGATTTATACTACCTTTATTTCTGTGTTTATAATTTTTTCATAGGATCTATAGCTGA  
GACAAATAGAGCTCCTTTTGATTTAGCCGAGGCTAACCTGCTAATCTGGTTTGGTCTGGTTATAT  
GTCACAAATTGCTAGGAAACCTTTTTATTTAAAAACAAAAGACAATTAGCAGGAACTTAATTT  
AACCTAATTAATAATATTAGATAATTAACTCTTCATAGACTAAACGTGACAATTTAATATATATA  
TATATTTATTTATATATATGATTAAATAAGATATAGTCAATCATCGGTGTGAATCGACTTAAAAAA  
AAAAGCACATGGGTAAACCCATCTCCCCTTATTAGGGGAATCAGAACTTGTTAGTGGGTTTAT

GACAGAGCATGCTGCCGTAGTTTTCGTATTCTTCTTTTAGCTGAGTACGGTAGTATTGTACTAAT  
GTGTATTTAACTAGTATATTATTTATTGGTGGTTACTTATTATTTGAAATATCCTATGTTTTACTG  
TGGTAAATTATATTTTCTTTGAATTATTCTTTATAGACTGAGTAACATTTGTAGAGGTACAATCTTT  
ATACACTGATTTTTTAAATAATTCTATCATTGAAGGATTATTATATGGGTTTAATCTAGGATTAAA  
AAGTTCTTTAATGATATTCACATTTATTTGAGCTAGAGCATCCTTCCCTAGAATACGATTTGATCA  
ACTAATGGGCTTCTGTTGAACAGTTTTATTACCTATTAATTTTGCAATTATTATATTAGTACCTTGT  
GTTTTATATAGTTTTAACTTATTACCTGTAAATATACCATTGTTCTAGCTCACACACCCGCCGCC  
CTACTGCCACAAGGCTACAGTACATATGAGGAGGGGAATAAGATCTAGAATACTATCCTAGTTA  
ATAATTACACTTAATAGTATACTAAATAGACCATCTATCATACTCGAGAATAGTGATAGTGTAAT  
TATACACTATTTTAACTGTATTCTACACTATTAGCATATTATTATCTTTATATGATAATAATTTTATA  
ACTTAATTTATTAGGTTACATTAACAAAAAATTCGTTAACTTTTTTCACCACTTTTAAATACAAAAT  
ACGAATTTTA

>YN010

ATAACAATTCTAAAGAACATAAAGAGTTATTAGATAAAAAATAATTCACCTATACAGTTAATAAAT  
CAACTTAAAGGGTATTTTTTCATAAATCCTTTATTAGCTTTAAGTTTAGCTATTACTATTTTCTCTTT  
TGCAGGTATTCCTCCTCTGTAGGGTCTTTGCTAAACAGATGGTATTAAGCGCGGCTATTGATC  
AAGGTTATATCTTTTTATCTTTAGTTGCAATATTAAGTGTATAGGAGGGGTTTATTATTTAAA  
TATAATTAAGAAATGTTCTTTTATTCACCTGACTATAAATTAACGAAGAAATTAATAAATAC  
TATTAATGGTCAAATTATTAATAGAAACAATAAAATATTAAATGTTGAATTTAATTATACAAATGT  
AGTTATGTCTAGTTCTGTGGCAATAACTATTTCTACTATTACATTAGTAGTTTTATTATTCATGTTT  
ATGAATAAAGAATGATTAAGTCTGGGTACTATATTGGTACAATCTTTATTTAGCTATTAATGAGTA  
GTATGACATTATTTATAGGGTTTGTATCTGTTATAGCTATTTTATTTTAGCCATTAATTTTATATTT  
GCTCCTCATAATCCTTATCAAGAAAAATATAGTATTTTCGAGTGTGGTTTCCATAGTTTTTTAGGG  
CAAAATAGAACACAATTCGGTATAAAATCTTTATTTTTGCTTTAGTTTATTTACTTTTAGATTTAG  
AAATATTATTAACTTTCCCTTTCGCTCTTAGTGAGTATGTTAATGGTATTTATGGTCTTTTAGTTAC  
TTTAATTTTTATAGCTATAATAACTATAGGATTTATATTTGAATTAGGTAAAAGCGCTCTTAAATA  
GACAGCAGACAAAAATTATATATACCTAAATTGAACGTTAATTACCATACAGAGTATGTTGGAAT  
AGGTAAGGTTTCTAAGTAAAGTTATAGAGGCAGAAAACCAAAAAACCTACCAAAGGGTAGCTA  
ATGGGAAGCTATTAATAAATAAAGATGATAACCTATATATAGTATAGTTACTATATATTTACTATA  
ACTAGGATTATTATATATATATATATTATCTTATTGTATATTAAGATTATTATTATAAGGTATA  
ATTAATATAGTATCTTATTGTATAAGAATATAATATATTAACCTATAATTAATTTTATTTTTTAATTT  
TTAATTATAATTTTTTTTTTATATCTAGATGCTTACACATCTACAGATGTAGAAGAGAACAAAATAT  
TGTTGTTATAGTAGTGGATGATATAGAAAAATATTTTTATATTATTTATTTTGTAGGTAGCTTTT  
GAAGTGTGATAGAGAGGATATATGGACGGTAGGAGGGTATTCATTTTAATGAACAGTGGATA  
GTTTAAATTAACCTAGTTATAGTTTATGAATTTAAATTATAATTATATTAATGTAGGTATGATAGA  
ATTATGTATTGATCCTTAAGAGTTAAGAGAGATACGCCACGTATAATACATATTGGTTTAGGGT  
TGAGTATATATACTTAAGAGTTAAGAATATATATATACAATATATAATAAATATAGTAATATATTA  
ATGGTATGGACTTAACCAGGTTTATATATTATCATTTGATAAACATTAATTATAATTTTTCTATTTA  
TTATTATTATTACTGTGAGATTAATAATTATTAATAATATTACATAGTACGTGATATTTGG  
GGATTTTATCTTATTAATTGGCAATTAATGATTCTAATCAAATTTTATTCTCTTTAGTTTAATGGTA  
GAACAATGATCTTCTAATTCATTGGTTTTAGTTTCGATTCTAAAAAGAGATGAGTAAATAATTTTCT  
AGATCAGAAATACTACTTTTAACTACAAAAAGCTTACGCTTTTTAACATTTTTTTGATAAATAACA  
ACTATTGTTAATATTTGGCTGTCTATTGGTTTAACTACAATTACAAAATTTTTCAATTTTTATAAT  
ATAAATTTAAATGAGAATATTAATAAAGTCATTCATTATTAATAAATTAGTGAATTCCTACCTTATCGA

TGCGTCACAACCAAGTAACATTAGTTACTTGTGAAATTTTGGTTCATTATTAGCTGTTTGTTAAT  
AGTACAAATTATTACCGGTATTACATTAGCTATGCATTATAGTCCTAGTGTAATGGAAGCTTTTAA  
CTCAATAGAGCATATAATGAGAGATGTTAATAACGGGTGATTAGTTCGTTATCTACATAGTAATA  
CAGCTTCTGCTTTCTTTTCTTAGTGATTTACACATAGGAAGAGGTATATATTACGGATCATATA  
GAGCTCCTCGTACTTTAGTTTGAGCTATTGGTACTGTTATATTAATATTAATGATGGCTATCGGT  
TCCTAGGTTATGTTTTACCTTATGGACAGATGTCATTATGAGGTGCTACAGTTACTAATCTTA  
TTAGTGCTATACCTGAATAGGGCAAGATATTGTTGAATTCATTTGAGGTGGTTTTCTGTTAATA  
ATGCCACTTTAAACAGATTTTTGCATTACATTTGTATTGCCTTTGTATTAGCTGCTTTAGTTTTA  
ATGCACTTAATTGCACTTCATGATACTGCTGGTTCAAGCAATCCTCTGGTGTTTCAGGTAATTAC  
GATAGAATTACATTTGCTCCATATTTTTATTTAAAGATTTAATTACTATTTTTATATTTATTTTGTA  
TTAAGTGCTTTGTATTCTTTATGCCTAATGTTTTAGGGGATAGTGATAATTATATTATGGCTAATC  
CTATGCAAACCTCCTGCTGCTATTGTACCTGAATGATACTTATTACCTTTCTATGCTATTTTAAGATC  
TATACCTAATAAATTATTAGGTGTTATAGCGATGTTTAGTGCTATTTAGCTATTATGTTATTACCT  
GTTACAGATTTAGGTAGATCTAGAGGTTTACAATTTAGACCATTTAGTAAATAGCTTTCTGAGTT  
TTTGTTGCTAATTTCTTAGTTTTAATGCAATTAGGTGCTAAACACGTTGAAGATCCATTTATATTAT  
TAGGTCAATTAAGTACTGTATTATACTTTAGTTATTTTGTTGCTATATTACCTTTAGCTAGTTACTT  
AGATAATAGTTTAACTGATTTATCTAATAAATCTGAATTATTTTAAATAAAACTAACTAAATATAT  
TAAGATTATTATTTAATATATTTTCTATTTAAGATACTATTAATTTAGTATTTTGGGTTTTAGTTTA  
TAATTTATATTATATTATGCATTACCCTCCACCTTGCTTTGTAGTAAGCTAATCTGTTATTTCTTTA  
GTTTAATGGTAGAACAATGATCTTCTAATTCATTGGTTTTAGTTTGAATCTAAAAAGGAAATAAG  
AAATATATTCTTATTATTACTTATATAATAATTATTTCTTAAAAATATACATTTTGCAATTATAGCCGT  
TTAGCTGTATTAAATGTAAATGATATAAAATAGAATAAATATTTAAATTATTCCTATGTTATATT  
ATCCTATATTGCAACCATTATCAGAAGTTGTATTAATACTTGTACCTGCCTTATTAGCTGTAGCTT  
ATGTTACAGTTGCTGAAAGAAAACTATGGCTAGTATGCAAAGAAGATTAGGTCCTAATGCTGT  
AGGTTACTATGGACTATTGCAAGCATTGCTGATGCCTTAAACTTTTTATTAAGAATATGTAG  
CTCCTACACAATCTAATATTGTTCTTTTCTTTTAGGTCCTGTAATAACTTTAATTTTGCAATTATTA  
GGTTACGCTGTTATACCCTATGGTCCTGGTTCAGGGATAAGCGACATGAATTTAGGTATATTTTA  
CATGTTAGCTGTGTCATCTTTAGCTACATACGGTATTCTATTAGCTGGTTGAAGTGCGAATAGTA  
AATACGCTTTTCTAGGTTCTCTTAGAAGTACAGCTCAATTAATTAGTTATGAATTAATATTAAGTT  
CAGCTATATTAATAGTAATTATGATAACAGGAAATTTAAATTTAACTGTTTGACTGAATCTCAAA  
GAGCTATTTGATTTATACTACCTTTATTTCTGTGTTTATAATATTTTTCATAGGATCTATAGCTGA  
GACAAATAGAGCTCCTTTGATTTAGCCGAGGCTAACCTGCTAATCTGGTTTGGTCTGGTTATAT  
GTCACAAATTGCTAGGAAACCTTTTTATTTAAAAACAAAAGACAATTAGCAGGAAACTTAATTT  
AACCTAATTAATAATATTAGATAATTAACCTCTCATAGACTAAACGTGACAATTTAATATATATA  
TATATTTATTTATATATATGATTAATAAGATATAGTCAATCATCGGTGTGAATCGACTTAAAAAA  
AAAAGCACATGGGTAAACCCATCTCCCCTTATTAGGGGAATCAGAACTTGTTAGTGGGTTTCAT  
GACAGAGCATGCTGCCGTAGTTTTCGTATTCTTCTTTTAGCTGAGTACGGTAGTATTGTACTAAT  
GTGTATTTTAACTAGTATATTATTTATTGGTGGTTACTTATTATTTGAAATATCCTATGTTTTACTG  
TGGTAAATTATATTTTCTTTGAATTATCTTTATAGACTGAGTAACATTTGTAGAGGTACAATCTTT  
ATACACTGATTTTTTAAATAATTCTATCATTGAAGGATTATTATATGGGTTAATCTAGGATTAAA  
AAGTTCTTTAATGATATTCACATTTATTTGAGCTAGAGCATCCTTCCCTAGAATACGATTTGATCA  
ACTAATGGGCTTCTGTTGAACAGTTTTATTACCTATTAATTTTGCAATTATTATATTAGTACCTTGT  
GTTTTATATAGTTTTAACTTATTACCTGTAAATATACCATTGTTCTAGCTCACACACCCGCCGCC  
CTACTGCCACAAGGCTACAGTACATATGAGGAGGGGAAGTAAAGATCTAGAAGTATCCTAGTTA

ATAATTACACTTAATAGTATACTAAATAGACCATCTATCATACTCGAGAATAGTGATAGTGTAAT  
TATACACTATTTTAACTGTATTCTACACTATTAGCATATTATTATCTTTATATGATAATAATTTTATA  
ACTTAATTTATTAGGTTACATTAACAAAAAATTCGTTAACTTTTTTCACCACTTTTAAACAAAAAT  
ACGAATTTTA

>YN029

ATAACAATTCTAAAGAACATAAAGAGTTATTAGATAAAAAATAATTCACCTATACAGTTAATAAAT  
CAACTTAAAGGGTATTTTTTCATAAATCCTTTATTAGCTTTAAGTTTAGCTATTACTATTTCTCTTT  
TGCAGGTATTCCTCCTCTGTAGGGTTCTTTGCTAAACAGATGGTATTAAGCGCGGCTATTGATC  
AAGGTTATATCTTTTTATCTTTAGTTGCAATATTAAGTGTATAGGAGGGGTTTATTATTTAAA  
TATAATTAAGAAATGTTCTTTTATTCACCTGACTATAAATTAAACGAAGAAATTAATAAATAC  
TATTAATGGTCAAATTATTAATAGAAACAATAAAATATTAATGTTGAATTTAATTATACAAATGT  
AGTTATGTCTAGTTCTGTGGCAATAACTATTTCTACTATTACATTAGTAGTTTTATTATTCATGTTT  
ATGAATAAAGAATGATTAAGTCTGGGTACTATATTGGTACAATCTTTATTTAGCTATTAATGAGTA  
GTATGACATTATTTATAGGGTTTGTATCTGTTATAGCTATTTTATTTTAGCCATTAATTTTATATTT  
GCTCCTCATAATCCTTATCAAGAAAAATATAGTATTTTCGAGTGTGGTTTCCATAGTTTTTTAGGG  
CAAAATAGAACACAATTCGGTATAAAATCCTTATTTTGTCTTAGTTTATTTACTTTTAGATTTAG  
AAATATTATTAACTTTCCCTTTCGCTCTTAGTGAGTATGTTAATGGTATTTATGGTCTTTTAGTTAC  
TTTAATTTTATAGCTATAATAACTATAGGATTTATATTTGAATTAGGTAAAAGCGCTCTTAAATA  
GACAGCAGACAAAAATTATATATACCTAAATTGAACGTTAATTACCATACAGAGTATGTTGGAAT  
AGGTAAGGTTTCTAAGTAAAGTTATAGAGGCAGAAAACCAAAAAACCTACCAAAGGGTAGCTA  
ATGGGAAGCTATTAATAAAGATGATAACCTATATATAGTATAGTTACTATATATTTACTATA  
ACTAGGATTATTATATATATATATATTATCTTATTGTATATTAAGATTATTATTATAAGGTATA  
ATTAATATAGTATCTTATTGTATAAGAATATAATATATTAACCTATAATTAATTTTATTTTAAATTT  
TTAATTATAATTTTTTTTTTATATCTAGATGCTTACACATCTACAGATGTAGAAGAGAACAAAATAT  
TGTTGTTATAGTAGTGGATGATATAGAAAAATATTTTTATATTATTTATTTTGTAGGTAGCTTTT  
GAAGTGTTTGATAGAGAGGATATATGGACGGTAGGAGGGTATTCATTTTAATGAACAGTGGATA  
GTTTAAATTAACCTAGTTATAGTTTATGAATTTAAATTATAATTATATTAATGTAGGTTATGATAGA  
ATTATGTATTGATCCTTAAGAGTTAAGAGAGATACGCCACGTATAATACATATTGGTTTAGGGT  
TGAGTATATATACTTAAGAGTTAAGAATATATATATACAATATATAATAAATATAGTAATATATTA  
ATGGTATGGACTTAACCAGGTTTATATATTATCATTGATAAACATTAATTATAATTTTCTATTTA  
TTATTATTATTACTGTGAGATTAATAATTATTAATAATATTACATAGTACGTGATATTTGG  
GGATTTTATCTTATTAATTGGCAATTAATGATTCTAATCAAATTTTATTCTCTTTAGTTTAAATGGTA  
GAACAATGATCTTCTAATTCATTGGTTTTAGTTTCGATTCTAAAAAGAGATGAGTAAATAATTTTCT  
AGATCAGAAATACTACTTTTAACTACAAAAAGCTTACGCTTTTAAACATTTTTTTGATAAATAACA  
ACTATTGTTAATATTTGGCTGTCTATTGGTTTAACTAACAATTACAAAATTTTTCAATTTTTATAAT  
ATAAATTTAAATGAGAATATTAAAAAGTCATTATTAAAAATTAGTGAATTCTTACCTTATCGA  
TGCCTCACAACCAAGTAACATTAGTTACTTGTGAAATTTTGGTTCATTATTAGCTGTTTGTAAAT  
AGTACAAATTATTACCGGTATTACATTAGCTATGCATTATAGTCCTAGTGAATGGAAGCTTTTAA  
CTCAATAGAGCATATAATGAGAGATGTTAATAACGGGTGATTAGTTCGTTATCTACATAGTAATA  
CAGCTTCTGCTTTCTTTTCTTAGTGTATTTACACATAGGAAGAGGTATATATTACGGATCATATA  
GAGCTCCTCGTACTTTAGTTTGAGCTATTGGTACTGTTATATTAATTAATGATGGCTATCGGTT  
TCCTAGGTTATGTTTTACCTTATGGACAGATGTCATTATGAGGTGCTACAGTTATTACTAATCTTA  
TTAGTGCTATACCTGAATAGGGCAAGATATTGTTGAATTCATTTGAGGTGGTTTTCTGTAAATA  
ATGCCACTTAAACAGATTTTTTGCATTACATTTGTATTGCCTTTGTATTAGCTGCTTTAGTTTTA

ATGCACTTAATTGCACTTCATGATACTGCTGGTTCAAGCAATCCTCTTGGTGTTTCAGGTAATTAC  
GATAGAATTACATTTGCTCCATATTTTTATTTAAAGATTTAATTACTATTTTTATATTTATTTTTGTA  
TTAAGTGCTTTTGTAATCTTTATGCCTAATGTTTTAGGGGATAGTGATAATTATATTATGGCTAATC  
CTATGCAAACCTCCTGCTGCTATTGTACCTGAATGATACTTATTACCTTTCTATGCTATTTTAAGATC  
TATACCTAATAAATTATTAGGTGTTATAGCGATGTTTAGTGCTATTTTAGCTATTATGTTATTACCT  
GTTACAGATTTAGGTAGATCTAGAGGTTTACAATTTAGACCATTTAGTAAAATAGCTTTCTGAGTT  
TTTGTTGCTAATTTCTTAGTTTTAATGCAATTAGGTGCTAAACACGTTGAAGATCCATTTATATTAT  
TAGGTCAATTAAGTACTGTATTATACTTTAGTTATTTTTGTTGCTATATTACCTTTAGCTAGTACTT  
AGATAATAGTTTAACTGATTTATCTAATAAATCTGAATTATTTTTAAATAAACTAACTAAATATAT  
TAAGATTATTATTTAATATATTTTCTATTTAAGATACTATTAATTTAGTATTTTGGGTTTTAGTTTA  
TAATTTATATTATATTATGCATTACCCTCCACCTTGCTTTGTAGTAAGCTAATCTGTTATTTCTTTA  
GTTTAATGGTAGAACAATGATCTTCTAATTCATTGGTTTTAGTTTGAATCTAAAAAGGAAATAAG  
AAATATATTCTTATTATTACTTATATAATAATTATTTCTTAAAAATATACATTTTGCAATTATAGCCGT  
TTAGCTGTATTAATAATGTAAATGATATAAAATAGAATAAATATTTAAATTATTCCTATGTTATATT  
ATCCTATATTGCAACCATTATCAGAAGTTGTATTAATACTTGTACCTGCCTTATTAGCTGTAGCTT  
ATGTTACAGTTGCTGAAAGAAAACTATGGCTAGTATGCAAAGAAGATTAGGTCCTAATGCTGT  
AGGTTACTATGGACTATTGCAAGCATTTGCTGATGCCTTAAACCTTTTATTAAGAATATGTAG  
CTCCTACACAATCTAATATTGTTCTTTTCTTTTAGGTCCTGTAATAACTTTAATTTTGCATTATTA  
GGTTACGCTGTTATACCCTATGGTCCTGGTTCAGGGATAAGCGACATGAATTTAGGTATATTTTA  
CATGTTAGCTGTGTCATCTTTAGCTACATACGGTATTCTATTAGCTGGTTGAAGTGCGAATAGTA  
AATACGCTTTTCTAGGTTCTCTTAGAAGTACAGCTCAATTAATTAGTTATGAATTAATTAAGTT  
CAGCTATATTAATAGTAATTATGATAACAGGAAATTTAAATTTAACTGTTTGTACTGAATCTCAAA  
GAGCTATTTGATTTATACTACCTTTATTTCTGTGTTTATAATATTTTTCATAGGATCTATAGCTGA  
GACAAATAGAGCTCCTTTTGATTTAGCCGAGGCTAACCTGCTAATCTGGTTTGGTCTGGTTATAT  
GTCACAAATTGCTAGGAAACCTTTTTATTTAAAAACAAAAGACAATTAGCAGGAACTTAATTT  
AACCTAATTAATAATATTAGATAAATAAATCTTTCATAGACTAAACGTGACAATTAATATATATA  
TATATTTATTTATATATATGATTAATAAGATATAGTCAATCATCGGTGTGAATCGACTTAAAAAA  
AAAAGCACATGGGTAAACCCATCTCCCCTTATTAGGGGAATCAGAACTTGTTAGTGGGTTTCAT  
GACAGAGCATGCTGCCGTAGTTTTCGTATTCTTCTTTTATAGCTGAGTACGGTAGTATTGTACTAAT  
GTGTATTTTAACTAGTATATTATTTATTGGTGGTTACTTATTATTTGAAATATCCTATGTTTTTACTG  
TGGTAAATTATATTTTCTTTGAATTATTCTTTATAGACTGAGTAACATTTGTAGAGGTACAATCTTT  
ATACACTGATTTTTTAAATAATTCTATCATTGAAGGATTATTATATGGGTTTAACTAGGATTA  
AAGTTCTTTAATGATATTCACATTTATTTGAGCTAGAGCATCCTTCCCTAGAATACGATTTGATCA  
ACTAATGGGCTTCTGTTGAACAGTTTTATTACCTATTAATTTTGAATTATTATATTAGTACCTTGT  
GTTTTATATAGTTTTAACTTATTACCTGTAAATATACCATTGTTCTAGCTCACACACCCGCCGCC  
CTACTGCCACAAGGCTACAGTACATATGAGGAGGGGAATAAGATCTAGAACTATCCTAGTTA  
ATAATTACACTTAATAGTATACTAAATAGACCATCTATCATACTCGAGAATAGTGATAGTGTAAT  
TATACACTATTTTAACTGTATTCTACACTATTAGCATATTATTATCTTTATATGATAATAATTTTATA  
ACTTAATTTATTAGGTTACATTAACAAAAAATTCGTTAACTTTTTTACCACCTTTTAAATACAAAAT  
ACGAATTTTA

>YN030

ATAACAATTCTAAAGAACATAAAGAGTTATTAGATAAAAAATAATTCACCTATACAGTTAATAAAT  
CAACTTAAAGGTATTTTTTCATAAATCCTTTATTAGCTTTAAGTTTAGCTATTACTATTTTCTCTTT  
TGCAGGTATTCCTCCTCTTGTAGGGTTCTTTGCTAAACAGATGGTATTAAGCGCGGCTATTGATC

AAGGTTATATCTTTTATCTTTAGTTGCAATATTAAGTGTATAGGAGGGGTTTATTATTTAAA  
TATAATTAAGAAATGTTCTTTTATTCACCTGACTATAAATTAACGAAGAAATTAATAATAC  
TATTAATGGTCAAATTATTAATAGAAACAATAAAATATTAATGTTGAATTTAATTATACAAATGT  
AGTTATGTCTAGTTCTGTGGCAATAACTATTTCTACTATTACATTAGTAGTTTTATTATTCATGTTT  
ATGAATAAAGAATGATTAAGTCTGGGTACTATATTGGTACAATCTTTATTTAGCTATTAATGAGTA  
GTATGACATTATTTATAGGGTTTGTATCTGTTATAGCTATTTTATTTTAGCCATTAATTTTATATTT  
GCTCCTCATAATCCTTATCAAGAAAAATATAGTATTTTCGAGTGTGGTTTCCATAGTTTTTTAGGG  
CAAAATAGAACACAATTCGGTATAAAATTCCTTATTTTGCTTTAGTTTATTTACTTTTAGATTTAG  
AAATATTATTAACCTTCCCTTCGCTCTTAGTGAGTATGTTAATGGTATTTATGGTCTTTTAGTTAC  
TTTAATTTTATAGCTATAATAACTATAGGATTTATATTTGAATTAGGTAAAAGCGCTCTTAAATA  
GACAGCAGACAAAAATTATATACCTAAATTGAACGTTAATTACCATACAGAGTATGTTGGAAT  
AGGTAAGGTTTCTAAGTAAAGTTATAGAGGCAGAAAACCAAAAAACCTACCAAAGGGTAGCTA  
ATGGGAAGCTATTAATAAAAGATGATAACCTATATATAGTATAGTTACTATATATTTACTATA  
ACTAGGATTATTATATATATATATATTATCTTATTGTATATTAAGATTATTATTATTATAAGGTATA  
ATTAATATAGTATCTTATTGTATAAGAATATAATATATTAACCTATAATTAATTTTATTTTAAATTT  
TTAATTATAATTTTTTTTATATCTAGATGCTTACACATCTACAGATGTAGAAGAGAACAAAATAT  
TGTTGTTATAGTAGTGGATGATATAGAAAAATATTTTATATTATTTATTTTGTAGGTAGCTTTT  
GAAGTGTGATAGAGAGGATATATGGACGGTAGGAGGTATTCATTTAATGAACAGTGGATA  
GTTTAAATTAACCTAGTTATAGTTTATGAATTTAAATTATAATTATATTAATGTAGGTTATGATAGA  
ATTATGTATTGATCCTTAAGAGTTAAGAGAGATACGCCACGTATAATACATATTGGTTTAGGGT  
TGAGTATATATACTTAAGAGTTAAGAATATATATATACAATATATAATAAATATAGTAATATATTA  
ATGGTATGGACTTAACCAGGTTTATATATTATCATTTGATAAACATTAATTATAATTTTCTATTTA  
TTATTATTATACTGTGAGATTAATAATTATTAATAATATTACATAGTACGTGATATTTGG  
GGATTTTATCTTATTAATTGGCAATTAATGATTCTAATCAAATTTTATTCTCTTTAGTTTAAATGGTA  
GAACAATGATCTTCTAATTCATTGGTTTTAGTTGATTCTAAAAAGAGATGAGTAAATAATTTTCT  
AGATCAGAAATACTACTTTTAACTACAAAAAGCTTACGCTTTTAAACATTTTTTGTAAATAACA  
ACTATTGTTAATATTTGGCTGTCTATTGGTTTAACTAACAATTACAAAATTTTTCAATTTTTATAAT  
ATAAATTTAAATGAGAATATTAATAAGTCATTATTATTAATAATTAGTGAATCTTACCTTATCGA  
TGCGTCACAACCAAGTAACATTAGTTACTTGTGAAATTTTGGTTCATTATTAGCTGTTTGTTAAT  
AGTACAAATTATTACCGGTATTACATTAGCTATGCATTATAGTCCTAGTGAATGGAAGCTTTTAA  
CTCAATAGAGCATATAATGAGAGATGTTAATAACGGGTGATTAGTTCGTTATCTACATAGTAATA  
CAGCTTCTGCTTCTTTTCTTAGTGTATTTACACATAGGAAGAGGTATATATTACGGATCATATA  
GAGCTCCTCGTACTTTAGTTGAGCTATTGGTACTGTTATATTAATATTAATGATGGCTATCGGTT  
TCCTAGGTTATGTTTTACCTTATGGACAGATGTCATTATGAGGTGCTACAGTTATTACTAATCTTA  
TTAGTGCTATACCTGAATAGGGCAAGATATTGTTGAATTCATTTGAGGTGGTTTTCTGTTAATA  
ATGCCACTTTAAACAGATTTTTGCATTACATTTGTATTGCCTTTGTATTAGCTGCTTTAGTTTA  
ATGCACTTAATTGCACTTCATGATACTGCTGGTTCAAGCAATCCTCTTGGTGTTCAGGTAATTAC  
GATAGAATTACATTTGCTCCATATTTTTATTTAAAGATTTAATTACTATTTTATATTTATTTTGT  
TTAAGTGCTTTTGTATTCTTTATGCCTAATGTTTTAGGGGATAGTGATAATTATATTATGGCTAATC  
CTATGCAAACCTCCTGCTGCTATTGTACCTGAATGATACTTATTACCTTTCTATGCTATTTTAAAGATC  
TATACCTAATAAATTATTAGGTGTTATAGCGATGTTTAGTGCTATTTAGCTATTATGTTATTACCT  
GTTACAGATTTAGGTAGATCTAGAGGTTTACAATTTAGACCATTTAGTAAATAGCTTTCTGAGTT  
TTTGTTGCTAATTTCTTAGTTTAAATGCAATTAGGTGCTAAACACGTTGAAGATCCATTTATATTAT  
TAGGTCAATTAAGTACTGTATTATACTTTAGTTATTTTGTGCTATATTACCTTTAGCTAGTTACTT

AGATAATAGTTTAACTGATTTATCTAATAAATCTGAATTATTTTTAAATAAACTAACTAAATATAT  
TAAGATTATTATTTAATATATTTTCTATTTAAGATACTATTAATTTAGTATTTTGGGTTTTTCAGTTTA  
TAATTTATATTATATTATGCATTACCTCCACCTTGCTTTGTAGTAAGCTAATCTGTTATTTCCCTTA  
GTTTAATGGTAGAACAATGATCTTCTAATTCATTGGTTTTAGTTCGAATCTAAAAAGGAAATAAG  
AAATATATTCTTATTATTACTTATATAATAATTATTTCTTAAAAATATACATTTTGCATTATAGCCGT  
TTAGCTGTATTAAAATGTAAAATGATATAAAATAGAATAAATATTTAAATTATTCCTATGTTATATT  
ATCCTATATTGCAACCATTATCAGAAAGTTGTATTAATACTTGTACCTGCCTTATTAGCTGTAGCTT  
ATGTTACAGTTGCTGAAAGAAAACTATGGCTAGTATGCAAAGAAGATTAGGTCCTAATGCTGT  
AGGTTACTATGGACTATTGCAAGCATTGCTGATGCCTTAAACCTTTTATTTAAAGAATATGTAG  
CTCCTACACAATCTAATATTGTTCTTTTCTTTTAGGTCCTGTAATAACTTTAATTTTTGCATTATTA  
GGTTACGCTGTTATACCCTATGGTCCTGGTTCAGGGATAAGCGACATGAATTTAGGTATATTTTA  
CATGTTAGCTGTGTCATCTTTAGCTACATACGGTATTCTATTAGCTGGTTGAAGTGCGAATAGTA  
AATACGCTTTTCTAGGTTCTCTTAGAAGTACAGCTCAATTAATTAGTTATGAATTAATTAAGTT  
CAGCTATATTAATAGTAATTATGATAACAGGAAATTTAAATTTAACTGTTTGTACTGAATCTCAAA  
GAGCTATTTGATTTATACTACCTTTATTTCTGTGTTTATAATTTTTTCATAGGATCTATAGCTGA  
GACAAATAGAGCTCCTTTTGATTTAGCCGAGGCTAACCTGCTAATCTGGTTTGGTCTGGTTATAT  
GTCACAAATTGCTAGGAAACCTTTTTATTTAAAAACAAAAGACAATTAGCAGGAAACTTAATTT  
AACCTAATTTAAATATTAGATAATTAACTCTTCATAGACTAAACGTGACAATTTAATATATATA  
TATATTTATTTATATATATGATTAAATAAGATATAGTCAATCATCGGTGTGAATCGACTTAAAAAA  
AAAAGCACATGGGTAAACCCATCTCCCCTTATTAGGGGAATCAGAACTTGTTAGTGGGTTTCAT  
GACAGAGCATGCTGCCGTAGTTTTCGTATTCTTCTTTTAGCTGAGTACGGTAGTATTGTACTAAT  
GTGTATTTTAACTAGTATATTATTTATTGGTGGTTACTTATTATTTGAAATATCCTATGTTTTTACTG  
TGGTAAATTATATTTTCTTTGAATTATTCTTTATAGACTGAGTAACATTTGTAGAGGTACAATCTTT  
ATACACTGATTTTTTAAATAATTCTATCATTGAAGGATTATTATATGGGTTTAACTAGGATTAAA  
AAGTTCCTTAATGATATTCACATTTATTTGAGCTAGAGCATCCTTCCCTAGAATACGATTTGATCA  
ACTAATGGGCTTCTGTTGAACAGTTTTATTACCTATTAATTTTGCAATTATTATATTAGTACCTTGT  
GTTTTATATAGTTTTAACTTATTACCTGTAAATATACCATTGTTCTAGCTCACACACCCGCCGCC  
CTACTGCCACAAGGCTACAGTACATATGAGGAGGGGAACTAAAGATCTAGAACTATCCTAGTTA  
ATAATTACACTTAATAGTATACTAAATAGACCATCTATCATACTCGAGAATAGTGATAGTGTAAT  
TATACACTATTTTAACTGTATTCTACACTATTAGCATATTATTATCTTTATATGATAATAATTTTATA  
ACTTAATTTATTAGGTTACATTAACAAAAAATTCGTTAACTTTTTTCACCACTTTTAAATACAAAAT  
ACGAATTTTA

>YN040

ATAACAATTCTAAAGAACATAAAGAGTTATTAGATAAAAAATAATTCACCTATACAGTTAATAAAT  
CAACTTAAAGGGTATTTTTTCATAAATCCTTTATTAGCTTTAAGTTTAGCTATTACTATTTCTCTTT  
TGCAGGTATTCCTCCTCTTGTAGGGTTCTTTGCTAAACAGATGGTATTAAGCGCGGCTATTGATC  
AAGGTTATATCTTTTTATCTTTAGTTGCAATATTAAGTGTATAGGAGGGGTTTATTATTTAAA  
TATAATTAAGAAATGTTCTTTTATTCACCTGACTATAAATTAAACGAAGAAATTAATAAATAC  
TATTAATGGTCAAATTATTAATAGAAACAATAAAATATTAAATGTTGAATTTAATTATACAAATGT  
AGTTATGTCTAGTTCTGTGGCAATAACTATTTCTACTATTACATTAGTAGTTTTATTATTCATGTTT  
ATGAATAAAGAATGATTAAGTCTGGGTACTATATTGGTACAATCTTTATTTAGCTATTAATGAGTA  
GTATGACATTATTTATAGGGTTTGTATCTGTTATAGCTATTTTATTTTAGCCATTAATTTTATATT  
GCTCCTCATAATCCTTATCAAGAAAAATATAGTATTTTCGAGTGTGGTTTCCATAGTTTTTATAGG  
CAAAATAGAACACAATTCGGTATAAAATCTTTATTTTGTCTTAGTTTATTTACTTTTAGATTTAG

AAATATTATTAACTTTCCCTTTCGCTCTTAGTGAGTATGTTAATGGTATTTATGGTCTTTTAGTTAC  
TTTAATTTTTATAGCTATAATAACTATAGGATTTATATTTGAATTAGGTAAAAGCGCTCTTAAAATA  
GACAGCAGACAAAAATTATATATACCTAAATTGAACGTTAATTACCATACAGAGTATGTTGGAAT  
AGGTAAGGTTTCTAAGTAAAGTTATAGAGGCAGAAAACCAAAAAACCTACCAAAGGGTAGCTA  
ATGGGAAGCTATTA AAAATAAAAGATGATAACCTATATATAGTATAGTTACTATATATTTACTATA  
ACTAGGATTATTATATATATATATATTATCTTATTGTATATTAAGATTATTATTATAAGGTATA  
ATTAATATAGTATCTTATTGTATAAGAATATAATATATTAACCTATAATTAATTTTATTTTTTAATTT  
TTAATTATAATTTTTTTTTTATATCTAGATGCTTACACATCTACAGATGTAGAAGAGAACAAAATAT  
TGTTGTTATAGTAGTGGATGATATAGAAAAATTTTTTATATTATTTATTTTTGTTAGGTAGCTTTT  
GAAGTGTTTGATAGAGAGGATATATGGACGGTAGGAGGGTATTCATTTTAATGAACAGTGGAATA  
GTTTAAATTAACCTAGTTATAGTTTATGAATTTAAATTATAATTATATTAATGTAGGTTATGATAGA  
ATTATGTATTGATCCTTAAGAGTTAAGAGAGATACGCCACGTATAATACATATTGGTTTAGGGT  
TGAGTATATATACTTAAGAGTTAAGAATATATATATACAATATATAATAAATATAGTAATATATTA  
ATGGTATGGACTTAACCAGGTTTATATATTATCATTTGATAAACATTAATTATAATTTTTCTATTTA  
TTATTATTATTATACTGTGAGATTAATAATTATTA AAATATAATATTACATAGTACGTGATATTTGG  
GGATTTTATCTTATTAATTGGCAATTAATGATTCTAATCAAATTTTATTCTCTTTAGTTTAATGGTA  
GAACAATGATCTTCTAATTCATTGGTTTTAGTTTCGATTCTAAAAAGAGATGAGTAAATAATTTTCT  
AGATCAGAAATACTACTTTTAACTACAAAAGCTTACGCTTTTTAACATTTTTTTGATAAATAACA  
ACTATTGTTAATATTTGGCTGTCTATTGGTTTAACTAACAATTACAAAATTTTTTCAATTTTTATAAT  
ATAAAATTTAAATGAGAATATTA AAAAGTCATTCAATTATTA AAAATTAGTGAATTCTTACCTTATCGA  
TGCGTCACAACCAAGTAACATTAGTTACTTGTGAAATTTTGGTTCATTATTAGCTGTTTGTTAAT  
AGTACAAATTATTACCGGTATTACATTAGCTATGCATTATAGTCCTAGTGTAATGGAAGCTTTTAA  
CTCAATAGAGCATATAATGAGAGATGTTAATAACGGGTGATTAGTTCGTTATCTACATAGTAATA  
CAGCTTCTGCTTTCTTTTTCTTAGTGATTTACACATAGGAAGAGGTATATATTACGGATCATATA  
GAGCTCCTCGTACTTTAGTTTGAGCTATTGGTACTGTTATATTAATTAATGATGGCTATCGGTT  
TCCTAGGTTATGTTTTACCTTATGGACAGATGTCATTATGAGGTGCTACAGTTATTACTAATCTTA  
TTAGTGCTATACCTGAATAGGGCAAGATATTGTTGAATTCATTTGAGGTGGTTTTTCTGTTAATA  
ATGCCACTTTAAACAGATTTTTTGCAATTACATTTGTATTGCCTTTTGTATTAGCTGCTTTAGTTTA  
ATGCACTTAATTGCACTTCATGATACTGCTGGTTCAAGCAATCCTCTTGGTGTTTCAGGTAATTAC  
GATAGAATTACATTTGCTCCATATTTTTATTTAAAGATTTAATTACTATTTTTATATTTATTTTTGTA  
TTAAGTGCTTTTGATTCTTTATGCCTAATGTTTTAGGGGATAGTGATAATTATATTATGGCTAATC  
CTATGCAAACCTCTGCTGCTATTGTACCTGAATGATACTTATTACCTTTCTATGCTATTTTAAGATC  
TATACCTAATAAATTATTAGGTGTTATAGCGATGTTTAGTGCTATTTTAGCTATTATGTTATTACCT  
GTTACAGATTTAGGTAGATCTAGAGGTTTACAATTTAGACCATTTAGTAAAATAGCTTTCTGAGTT  
TTTGTTGCTAATTTCTTAGTTTAAATGCAATTAGGTGCTAAACACGTTGAAGATCCATTTATATTAT  
TAGGTCAATTAAGTACTGTATTATACTTTAGTTATTTTGTTGCTATATTACCTTTAGCTAGTTACTT  
AGATAATAGTTTAACTGATTTATCTAATAAATCTGAATTATTTTAAATAAAACTAACTAAATATAT  
TAAGATTATTATTTAATATATTTTCTATTTAAGATACTATTAATTTAGTATTTTGGGTTTTAGTTTA  
TAATTTATATTATATTATGCATTACCCTCCACCTTGCTTTGTAGTAAGCTAATCTGTTATTTCTTTA  
GTTTAATGGTAGAACAAATGATCTTCTAATTCATTGGTTTTAGTTTGAATCTAAAAAGGAAATAAG  
AAATATATTCTTATTATTACTTATATAATAATTATTTCTTAAAAATATACATTTTGCAATTATAGCCGT  
TTAGCTGTATTAAATGTAAATGATATAAAATAGAATAAATATTTAAATTATTCCTATGTTATATT  
ATCCTATATTGCAACCATTATCAGAAGTTGTATTAATACTTGTACCTGCCTTATTAGCTGTAGCTT  
ATGTTACAGTTGCTGAAAGAAAACTATGGCTAGTATGCAAAGAAGATTAGGTCCTAATGCTGT

AGGTTACTATGGACTATTGCAAGCATTGCTGATGCCTTAAAACCTTTTATTTAAAAGAATATGTAG  
CTCCTACACAATCTAATATTGTTCTTTTCTTTTAGGTCCTGTAATAACTTTAATTTTGCATTATTA  
GGTTACGCTGTTATACCCTATGGTCCTGGTTCAGGGATAAGCGACATGAATTTAGGTATATTTTA  
CATGTTAGCTGTGTCATCTTTAGCTACATACGGTATTCTATTAGCTGGTTGAAGTGCGAATAGTA  
AATACGCTTTTCTAGGTTCTCTTAGAAGTACAGCTCAATTAATTAGTTATGAATTAATATTAAGTT  
CAGCTATATTAATAGTAATTATGATAACAGGAAATTTAAATTTAACTGTTTGTACTGAATCTCAAA  
GAGCTATTTGATTTATACTACCTTTATTTCTGTGTTTATAATATTTTTCATAGGATCTATAGCTGA  
GACAAATAGAGCTCCTTTTGATTTAGCCGAGGCTAACCTGCTAATCTGGTTTGGTCTGGTTATAT  
GTCACAAATTGCTAGGAAACCTTTTTATTTAAAAACAAAAGACAATTAGCAGGAAACTTAATTT  
AACCTAATTAATAATATTAGATAATTAACCTCTTCATAGACTAAACGTGACAATTTAATATATATA  
TATATTTATTTATATATATGATTAAATAAGATATAGTCAATCATCGGTGTGAATCGACTTAAAAAA  
AAAAGCACATGGGTAAACCCATCTCCCCTTATTAGGGGAATCAGAAGTTGTTAGTGGGTTTCAT  
GACAGAGCATGCTGCCGTAGTTTTCGTATTCTTCTTTTAGCTGAGTACGGTAGTATTGTACTAAT  
GTGTATTTTAACTAGTATATTATTTATTGGTGGTTACTTATTATTTGAAATATCCTATGTTTTACTG  
TGGTAAATTATATTTTCTTTGAATTATCTTTATAGACTGAGTAACATTTGTAGAGGTACAATCTTT  
ATACACTGATTTTTTAAATAATTCTATCATTGAAGGATTATTATATGGGTTTAACTAGGATTAAA  
AAGTTCTTTAATGATATTCACATTTATTTGAGCTAGAGCATCCTTCCCTAGAATACGATTTGATCA  
ACTAATGGGCTTCTGTTGAACAGTTTTATTACCTATTAATTTTGCAATTATTATATTAGTACCTTGT  
GTTTTATATAGTTTTAACTTATTACCTGTAAATATACCATTGTTCTAGCTCACACACCCGCCGCC  
CTACTGCCACAAGGCTACAGTACATATGAGGAGGGGAATAAGATCTAGAAGTATCCTAGTTA  
ATAATTACACTTAATAGTATACTAAATAGACCATCTATCATACTCGAGAATAGTGATAGTGTAAT  
TATACACTATTTTAACTGTATTCTACACTATTAGGATATTATTATCTTTATATGATAATAATTTTATA  
ACTTAATTTATTAGGTTACATTAACAAAAAATTCGTTAACTTTTTTCACCACTTTTAAATACAAAAT  
ACGAATTTTA

>YN047

ATAACAATTCTAAAGAACATAAAGAGTTATTAGATAAAAAATAATTCACCTATACAGTTAATAAAT  
CAACTTAAAGGGTATTTTTTCATAAATCCTTTATTAGCTTTAAGTTTAGCTATTACTATTTTCTCTTT  
TGCAGGTATTCCTCCTCTGTAGGGTTCTTTGCTAAACAGATGGTATTAAGCGCGGCTATTGATC  
AAGGTTATATCTTTTTATCTTTAGTTGCAATATTAAGTGTATAGGAGGGGTTTATTATTTAAA  
TATAATTAAGAAATGTTCTTTTATTCACCTGACTATAAATTAACGAAGAAATTAATAAATAC  
TATTAATGGTCAAATTATTAATAGAAACAATAAAATATTAATGTTGAATTTAATTATACAAATGT  
AGTTATGTCTAGTTCTGTGGCAATAACTATTTCTACTATTACATTAGTAGTTTTATTATTCATGTTT  
ATGAATAAAGAATGATTAAGTCTGGGTACTATATTGGTACAATCTTTATTTAGCTATTAATGAGTA  
GTATGACATTATTTATAGGGTTTGTATCTGTTATAGCTATTTTATTTTAGCCATTAATTTTATATTT  
GCTCCTCATAATCCTTATCAAGAAAAATATAGTATTTTCGAGTGTGGTTTCCATAGTTTTTTAGGG  
CAAAATAGAACACAATTCGGTATAAAATCTTTATTTTGCTTTAGTTTATTTACTTTTAGATTTAG  
AAATATTATTAACTTTCCCTTCGCTCTTAGTGAGTATGTTAATGGTATTTATGGTCTTTTAGTTAC  
TTTAATTTTTATAGCTATAATAACTATAGGATTTATATTTGAATTAGGTAAAAGCGCTCTTAAATA  
GACAGCAGACAAAAATTATATATACCTAAATTGAACGTTAATTACCATACAGAGTATGTTGGAAT  
AGGTAAGGTTTCTAAGTAAAGTTATAGAGGCAGAAAACCAAAAAACCTACCAAAGGGTAGCTA  
ATGGGAAGCTATTAAAAATAAAGATGATAACCTATATATAGTATAGTTACTATATATTTACTATA  
ACTAGGATTATTATATATATATATATTATCTTATTGTATATTAAGATTATTATTATTATAAGGTATA  
ATTAATATAGTATCTTATTGTATAAGAATATAATATATTAACCTATAATTAATTTTATTTTTAATTT  
TTAATTATAATTTTTTTTTTATATCTAGATGCTTACACATCTACAGATGTAGAAGAGAACAAAATAT

TGTTGTTATAGTAGTGGATGATATAGAAAAATATTTTTATATTATTTATTTTTGTTAGGTAGCTTTT  
GAAGTGTGTTGATAGAGAGGATATATGGACGGTAGGAGGGTATTCATTTTAATGAACAGTGGATA  
GTTTAAATTAACCTAGTTATAGTTTATGAATTTAAATTATAATTATATTAATGTAGGTTATGATAGA  
ATTATGTATTGATCCTTAAGAGTTAAGAGAGATACGCCACGTATAATACATATTGGTTTAGGGT  
TGAGTATATATACTTAAGAGTTAAGAATATATATATACAATATATAATAAATATAGTAATATATTA  
ATGGTATGGACTTAACCAGGTTTATATATTATCATTGATAAACATTAATTATAATTTTTCTATTTA  
TTATTATTATTATACTGTGAGATTAATAATTATTTAAATATAATATTACATAGTACGTGATATTTGG  
GGATTTTATCTTATTAATTGGCAATTAATGATTCTAATCAAATTTTATTCTCTTTAGTTTAATGGTA  
GAACAATGATCTTCTAATTCATTGGTTTTAGTTGATTCTAAAAAGAGATGAGTAAATAATTTTCT  
AGATCAGAAATACTACTTTTAACTACAAAAAGCTTACGCTTTTAAACATTTTTTTGATAAATAACA  
ACTATTGTTAATATTTGGCTGTCTATTGGTTTAACTACAATTACAAAATTTTTTCAATTTTTATAAT  
ATAAATTTAAATGAGAATATTTAAAAAGTCATTCATTATTTAAATTAGTGAATTCTTACCTTATCGA  
TGCGTCACAACCAAGTAACATTAGTTACTTGTGAAATTTTGGTTCATTATTAGCTGTTTGTTAAT  
AGTACAAATTATTACCGGTATTACATTAGCTATGCATTATAGTCCTAGTGAATGGAAGCTTTTAA  
CTCAATAGAGCATATAATGAGAGATGTTAATAACGGGTGATTAGTTCGTTATCTACATAGTAATA  
CAGCTTCTGCTTTCTTTTCTTAGTGATTACACATAGGAAGAGGTATATATTACGGATCATATA  
GAGCTCCTCGTACTTTAGTTTGAGCTATTGGTACTGTTATATTAATTAATGATGGCTATCGGTT  
TCCTAGGTTATGTTTTACCTTATGGACAGATGTCATTATGAGGTGCTACAGTTATTACTAATCTTA  
TTAGTGCTATACCTGAATAGGGCAAGATATTGTTGAATTCATTTGAGGTGGTTTTCTGTTAATA  
ATGCCACTTTAAACAGATTTTTTGCAATTACATTTGTATTGCCTTTGTATTAGCTGCTTTAGTTTA  
ATGCACTTAATTGCACTTCATGATACTGCTGGTTCAAGCAATCCTCTGGTGTTTCAGGTAATTAC  
GATAGAATTACATTTGCTCCATATTTTTATTTAAAGATTTAATTACTATTTTTATATTTATTTTGTA  
TTAAGTGCTTTGTATTCTTTATGCCTAATGTTTTAGGGGATAGTGATAATTATATTATGGCTAATC  
CTATGCAAACCTCCTGCTGCTATTGTACCTGAATGATACTTATTACCTTTCTATGCTATTTTAAGATC  
TATACCTAATAAATTATTAGGTGTTATAGCGATGTTTAGTGCTATTTAGCTATTATGTTATTACCT  
GTTACAGATTTAGGTAGATCTAGAGGTTTACAATTTAGACCATTTAGTAAAATAGCTTTCTGAGTT  
TTTGTTGCTAATTTCTTAGTTTTAATGCAATTAGGTGCTAAACACGTTGAAGATCCATTTATATTAT  
TAGGTCAATTAAGTACTGTATTATACTTTAGTTATTTTGTTGCTATATTACCTTTAGCTAGTTACTT  
AGATAATAGTTTAACTGATTTATCTAATAAATCTGAATTATTTTAAATAAACTAACTAAATATAT  
TAAGATTATTATTTAATATATTTTCTATTTAAGATACTATTAATTTAGTATTTTGGGTTTTAGTTTA  
TAATTTATATTATATTATGCATTACCCTCCACCTTGCTTTGTAGTAAGCTAATCTGTTATTTCTTTA  
GTTTAATGGTAGAACAATGATCTTCTAATTCATTGGTTTTAGTTGATTCTAAAAAGGAAATAAGA  
AATATATTCTTATTACTTATATAATAATTATTTCTTAAAAATATACATTTTGCAATTATAGCCGTT  
TAGCTGTATTTAAATGTAAATGATATAAAATAGAATAAATATTTAAATTATTCCTATGTTATATT  
ATCCTATATTGCAACCATTATCAGAAGTTGTATTAATACTTGTACCTGCCTTATTAGCTGTAGCTT  
ATGTTACAGTTGCTGAAAGAAAACTATGGCTAGTATGCAAAGAAGATTAGGTCCTAATGCTGT  
AGGTTACTATGGACTATTGCAAGCATTTGCTGATGCCTTAAACCTTTTATTTAAAGAATATGTAG  
CTCCTACACAATCTAATATTGTTCTTTTCTTTTAGGTCCTGTAATAACTTTAATTTTTGCATTATTA  
GGTTACGCTGTTATACCCTATGGTCCTGGTTCAGGATAAGCGACATGAATTTAGGTATATTTTA  
CATGTTAGCTGTGTCATCTTTAGCTACATACGGTATTCTATTAGCTGGTTGAAGTGCGAATAGTA  
AATACGCTTTTCTAGGTTCTCTTAGAAGTACAGCTCAATTAATTAGTTATGAATTAATATTAAGTT  
CAGCTATATTAATAGTAATTATGATAACAGGAAATTTAAATTTAACTGTTTGACTGAATCTCAAA  
GAGCTATTTGATTTATACTACCTTTATTTCTGTGTTTATAATATTTTTCATAGGATCTATAGCTGA  
GACAAATAGAGCTCCTTTTGATTTAGCCGAGGCTAACCTGCTAATCTGGTTTGGTCTGGTTATAT

GTCACAAATTGCTAGGAAACCTTTTTATTTTAAAAACAAAAGACAATTAGCAGGAACTTAATTT  
AACCTAATTAATAATATTAGATAATTAACCTCTTCATAGACTAAACGTGACAATTTAATATATATA  
TATATTTATTTATATATATGATTAATAAGATATAGTCAATCATCGGTGTGAATCGACTTAAAAAA  
AAAAGCACATGGGTAAACCCATCTCCCCTTATTAGGGGAATCAGAACTTGTTAGTGGGTTTCAT  
GACAGAGCATGCTGCCGTAGTTTTCGTATTCTTCTTTTAGCTGAGTACGGTAGTATTGTACTAAT  
GTGTATTTTAACTAGTATATTATTTATTGGTGGTTACTTATTATTTGAAATATCCTATGTTTTACTG  
TGGTAAATTATATTTTCTTTGAATTATTCTTTATAGACTGAGTAACATTTGTAGAGGTACAATCTTT  
ATACACTGATTTTTTAAATAATTCTATCATTGAAGGATTATTATATGGGTTTAATCTAGGATTAAA  
AAGTTCTTTAATGATATTCACATTTATTTGAGCTAGAGCATCCTTCCCTAGAATACGATTTGATCA  
ACTAATGGGCTTCTGTTGAACAGTTTTATTACCTATTAATTTTGCAATTATTATATTAGTACCTTGT  
GTTTTATATAGTTTTAACTTATTACCTGTAAATATACCATTGTTCTAGCTCACACACCCGCCGCC  
CTACTGCCACAAGGCTACAGTACATATGAGGAGGGGAACCTAAAGATCTAGAACTATCCTAGTTA  
ATAATTACACTTAATAGTATACTAAATAGACCATCTATCATACTCGAGAATAGTGATAGTGTAAT  
TATACACTATTTTAACTGTATTCTACACTATTAGCATATTATTATCTTTATATGATAATAATTTTATA  
ACTTAATTTATTAGGTTACATTAACAAAAAATTCGTTAACTTTTTTCACCACTTTTTAATACAAAAT  
ACGAATTTTA

>YN084

ATAACAATTCTAAAGAACATAAAGAGTTATTAGATAAAAAATAATTCACCTATACAGTTAATAAAT  
CAACTTAAAGGGTATTTTTTCATAAATCCTTTATTAGCTTTAAGTTAGCTATTACTATTTTCTCTTT  
TGCAGGTATTCCTCCTCTTGTAGGGTCTTTGCTAAACAGATGGTATTAAGCGCGGCTATTGATC  
AAGGTTATATCTTTTATCTTTAGTTGCAATATTAAGTGTATAGGAGGGGTTTATTATTTAAA  
TATAATTAAGAAATGTTCTTTTATTCACCTGACTATAAATTAACGAAGAAATTAATAAATAC  
TATTAATGGTCAAATTATTAATAGAAACAATAAAATATTAATGTTGAATTTAATTATACAAATGT  
AGTTATGTCTAGTTCTGTGGCAATAACTATTTCTACTATTACATTAGTAGTTTTATTATTCATGTTT  
ATGAATAAAGAATGATTAAGTCTGGGTACTATATTGGTACAATCTTTATTTAGCTATTAATGAGTA  
GTATGACATTATTTATAGGGTTTGTATCTGTTATAGCTATTTTATTTTAGCCATTAATTTTATATTT  
GCTCCTCATAATCCTTATCAAGAAAAATATAGTATTTTCGAGTGTGGTTTCCATAGTTTTTTAGGG  
CAAAATAGAACACAATTCGGTATAAAATCTTTATTTTGCTTTAGTTTATTTACTTTTAGATTTAG  
AAATATTATTAACCTTTCCCTTTGCTCTTAGTGAGTATGTTAATGGTATTTATGGTCTTTTAGTTAC  
TTTAATTTTTATAGCTATAATAACTATAGGATTTATATTTGAATTAGGTAAAAGCGCTCTTAAATA  
GACAGCAGACAAAAATTATATACCTAAATTGAACGTTAATTACCATACAGAGTATGTTGGAAT  
AGGTAAGGTTTCTAAGTAAAGTTATAGAGGCAGAAAACCAAAAAACCTACCAAAGGGTAGCTA  
ATGGGAAGCTATTAATAAAGATGATAACCTATATATAGTATAGTTACTATATATTTACTATA  
ACTAGGATTATTATATATATATATATTATCTTATTGTATATTAAGATTATTATTATAAGGTATA  
ATTAATATAGTATCTTATTGTATAAGAATATAATATATTAACCTATAATTAATTTTATTTTTAATTT  
TTAATTATAATTTTTTTTTATATCTAGATGCTTACACATCTACAGATGTAGAAGAGAACAAAATAT  
TGTTGTTATAGTAGTGATATAGAAAAATATTTTATATTATTTATTTTGTAGGTAGCTTTT  
GAAGTGTGATAGAGAGGATATATGGACGGTAGGAGGTATTCATTTAATGAACAGTGGATA  
GTTTAAATTAACCTAGTTATAGTTTATGAATTTAAATTATAATTATATTAATGTAGGTATGATAGA  
ATTATGTATTGATCCTTAAGAGTTAAGAGAGATACGCCACGTATAATACATATTGGTTAGGGT  
TGAGTATATATACTTAAGAGTTAAGAATATATATATACAATATATAAATAATATAGTAATATATTA  
ATGGTATGGACTTAACCAGGTTTATATATTATCATTTGATAAACATTAATTATAATTTTTCTATTTA  
TTATTATTATACTGTGAGATTAATAATTATTAATAATATTACATAGTACGTGATATTTGG  
GGATTTTATCTTATTAATTGGCAATTAATGATTCTAATCAAATTTTATTCTCTTAGTTTAATGGTA

GAACAATGATCTTCTAATTCATTGGTTTTAGTTTCGATTCTAAAAAGAGATGAGTAAATAATTTTCT  
AGATCAGAAATACTACTTTTAACTACAAAAAGCTTACGCTTTTAAACATTTTTTGATAAATAACA  
ACTATTGTTAATATTTGGCTGTCTATTGGTTTAACTAACAATTACAAAATTTTTCAATTTTTATAAT  
ATAAATTTAAATGAGAATATTA AAAAGTCATTATTATTA AAAATTAGTGAATTCTTACCTTATCGA  
TGCGTCACAACCAAGTAACATTAGTTACTTGTGAAATTTTGGTTCATTATTAGCTGTTTGTTAAT  
AGTACAAATTATTACCGGTATTACATTAGCTATGCATTATAGTCCTAGTGAATGGAAGCTTTTAA  
CTCAATAGAGCATATAATGAGAGATGTTAATAACGGGTGATTAGTTCGTTATCTACATAGTAATA  
CAGCTTCTGCTTTCTTTTTCTTAGTGATTTACACATAGGAAGAGGTATATATTACGGATCATATA  
GAGCTCCTCGTACTTTAGTTTGAGCTATTGGTACTGTTATATTAATTAATGATGGCTATCGGT  
TCCTAGGTTATGTTTTACCTTATGGACAGATGTCATTATGAGGTGCTACAGTTATTACTAATCTTA  
TTAGTGCTATACCTGAATAGGGCAAGATATTGTTGAATTCATTTGAGGTGGTTTTCTGTTAATA  
ATGCCACTTTAAACAGATTTTTGCATTACATTTGTATTGCCTTTGTATTAGCTGCTTTAGTTTAA  
ATGCACTTAATTGCACTTCATGATACTGCTGGTTCAAGCAATCCTCTGGTGTTTCAGGTAATTAC  
GATAGAATTACATTTGCTCCATATTTTTATTTAAAGATTTAATTACTATTTTTATTTATTTTTGTA  
TTAAGTGCTTTTGATTCTTTATGCCTAATGTTTTAGGGGATAGTGATAATTATATTATGGCTAATC  
CTATGCAAACCTCTGCTGCTATTGTACCTGAATGATACTTATTACCTTTCTATGCTATTTTAAGATC  
TATACCTAATAAATTATTAGGTGTTATAGCGATGTTTAGTGCTATTTAGCTATTATGTTATTACCT  
GTTACAGATTTAGGTAGATCTAGAGGTTTACAATTTAGACCATTTAGTAAAATAGCTTTCTGAGTT  
TTTGTTGCTAATTTCTTAGTTTTAATGCAATTAGGTGCTAAACACGTTGAAGATCCATTTATATTAT  
TAGGTCAATTAAGTACTGTATTATACTTTAGTTATTTTTGTTGCTATATTACCTTTAGCTAGTTACTT  
AGATAATAGTTTAACTGATTTATCTAATAAATCTGAATTATTTTAAATAAACTAACTAAATATAT  
TAAGATTATTATTTAATATATTTTCTATTTAAGATACTATTAATTTAGTATTTTGGGTTTTCAGTTTA  
TAATTTATATTATATTATGCATTACCTCCACCTTGCTTTGTAGTAAGCTAATCTGTTATTTCTTTA  
GTTTAATGGTAGAACAATGATCTTCTAATTCATTGGTTTTAGTTTGAATCTAAAAAGGAAATAAG  
AAATATATTCTTATTATTACTTATATAATAATTATTTCTTAAAAATATACATTTTGCATTATAGCCGT  
TTAGCTGTATTA AAAATGTAAAATGATATA AAAATAGAATAAAATTTAAATTATTCCTATGTTATATT  
ATCCTATATTGCAACCATTATCAGAAGTTGTATTAATACTTGTACCTGCCTTATTAGCTGTAGCTT  
ATGTTACAGTTGCTGAAAGAAAACTATGGCTAGTATGCAAAGAAGATTAGGTCCTAATGCTGT  
AGGTTACTATGGACTATTGCAAGCATTTGCTGATGCCTTAAACTTTTATTA AAAAGAATATGTAG  
CTCCTACACAATCTAATATTGTTCTTTCTTTTAGGTCCTGTAATAACTTTAATTTTTGCATTATTA  
GGTTACGCTGTTATACCCTATGGTCCTGGTTCAGGGATAAGCGACATGAATTTAGGTATATTTTA  
CATGTTAGCTGTGTCATCTTTAGCTACATACGGTATTCTATTAGCTGGTTGAAGTGCGAATAGTA  
AATACGCTTTTCTAGGTTCTCTTAGAAGTACAGCTCAATTAATTAGTTATGAATTAATTAAGTT  
CAGCTATATTAATAGTAATTATGATAACAGGAAATTTAAATTTAACTGTTTGTACTGAATCTCAAA  
GAGCTATTTGATTTATACTACCTTTATTTCTGTGTTATAATATTTTTCATAGGATCTATAGCTGA  
GACAAATAGAGCTCCTTTTGATTTAGCCGAGGCTAACCTGCTAATCTGGTTTGGTCTGGTTATAT  
GTCACAAATTGCTAGGAAACCTTTTTATTTTAAAAACAAAAGACAATTAGCAGGAAACTTAATTT  
AACCTAATTA AAAATATTAGATAATTAACTCTTCATAGACTAAACGTGACAATTTAATATATATA  
TATATTTATTTATATATATGATTAAATAAGATATAGTCAATCATCGGTGTGAATCGACTTAAAAAA  
AAAAGCACATGGGTAAACCCATCTCCCTTATTAGGGGAATCAGAACTTGTTAGTGGGTTTCAT  
GACAGAGCATGCTGCCGTAGTTTTCGTATTCTTCTTTTAGCTGAGTACGGTAGTATTGTACTAAT  
GTGTATTTTAACTAGTATATTATTTATTGGTGGTTACTTATTATTTGAAATATCCTATGTTTTTACTG  
TGGTAAATTATATTTTCTTTGAATTATTCTTTATAGACTGAGTAACATTTGTAGAGGTACAATCTTT  
ATACACTGATTTTTTAAATAATTCTATCATTGAAGGATTATTATATGGGTTAATCTAGGATTA

AAGTTCTTTAATGATATTCACATTTATTTGAGCTAGAGCATCCTTCCCTAGAATACGATTTGATCA  
ACTAATGGGCTTCTGTTGAACAGTTTTATTACCTATTAATTTTGCAATTATTATATTAGTACCTTGT  
GTTTTATATAGTTTTAACTTATTACCTGTAAATATACCATTGTTCTAGCTCACACACCCGCCGCC  
CTACTGCCACAAGGCTACAGTACATATGAGGAGGGGAAGTAAAGATCTAGAACTATCCTAGTTA  
ATAATTACACTTAATAGTATACTAAATAGACCATCTATCATACTCGAGAATAGTGATAGTGTAAT  
TATACACTATTTTAACTGTATTCTACACTATTAGCATATTATTATCTTTATATGATAATAATTTTATA  
ACTTAATTTATTAGGTTACATTAACAAAAAATTCGTTAACTTTTTTCACCACTTTTAAATACAAAAT  
ACGAATTTTA

>YN093

ATATCAATTCTAAAGAACATAAAGAGTTATTAGATAAAAAATAATTCACCTATACAGTTAATAAAT  
CAACTTAAAGGGTATTTTTTCATAAATCCTTTATTAGCTTTAAGTTTAGCTATTACTATTTCTCTTT  
TGCAGGTATTCTCCTCTTGTAGGGTCTTTGCTAAACAGATGGTATTAAGCGCGGCTATTGATC  
AAGGTTATATCTTTTTATCTTTAGTTGCAATATTAAGTGTATAGGAGGGGTTTATTATTTAAA  
TATAATTAAGAAATGTTCTTTTATTCACCTGACTATAAATTAACGAAGAAATTAATAAATAC  
TATTAATGGTCAAATTATTAATAGAAACAATAAATATTAATGTTGAATTTAATTATACAAATGT  
AGTTATGTCTAGTTCTGTGGCAATAACTATTTCTACTATTACATTAGTAGTTTTATTATTCATGTTT  
ATGAATAAAGAATGATTAAGTCTGGGTACTATATTGGTACAATCTTTATTTAGCTATTAATGAGTA  
GTATGACATTATTTATAGGGTTGTATCTGTTATAGCTATTTTATTTTAGCCATTAATTTATATTT  
GCTCCTCATAATCCTTATCAAGAAAAATATAGTATTTTCGAGTGTGGTTTCCATAGTTTTTTAGGG  
CAAAATAGAACACAATTCGGTATAAAATTCCTTTATTTTGTCTTAGTTTATTTACTTTTAGATTTAG  
AAATATTATTAACTTTCCCTTCGCTCTTAGTGAGTATGTTAATGGTATTTATGGTCTTTTAGTTAC  
TTTAATTTTTATAGCTATAATAACTATAGGATTTATATTTGAATTAGGTAAGCGCTCTTAAATA  
GACAGCAGACAAAAATTATATATACCTAAATTGAACGTTAATTACCATACAGAGTATGTTGGAAT  
AGGTAAGGTTTCTAAGTAAAGTTATAGAGGCAGAAAACCAAAAAACCTACCAAAGGGTAGCTA  
ATGGGAAGCTATTAATAAATAAAGATGATAACCTATATATAGTATAGTTACTATATATTTACTATA  
ACTAGGATTATTATATATATATATATTATCTTATTGTATATTAAGATTATTATTATAAGGTATA  
ATTAATATAGTATCTTATTGTATAAGAATATAATATATTAACCTATAATTAATTTTATTTTTAATTT  
TTAATTATAATTTTTTTTTATATCTAGATGCTTACACATCTACAGATGTAGAAGAGAACAAAATAT  
TGTTGTTATAGTAGTGGATGATATAGAAAAATATTTTTATATTATTTATTTTGTAGGTAGCTTTT  
GAAGTGTGTTGATAGAGAGGATATATGGACGGTAGGAGGGTATTCATTTAATGAACAGTGGATA  
GTTTAAATTAACCTAGTTATAGTTTATGAATTTAAATTATAATTATATTAATGTAGGTTATGATAGA  
ATTATGTATTGATCCTTAAGAGTTAAGAGAGATACGCCACGTATAATACATATTGGTTTAGGGT  
TGAGTATATATACTTAAGAGTTAAGAATATATATATACAATATATAATAAATATAGTAATATATTA  
ATGGTATGGACTTAACCAGGTTTATATATTATCATTGATAAACATTAATTATAATTTTTCTATTTA  
TTATTATTATTATACTGTGAGATTAATAATTATTAATAATATTAATATTACATAGTACGTGATTTTGG  
GGATTTTATCTTATTAATTGGCAATTAATGATTCTAATCAAATTTTATTCTCTTAGTTAATGGTA  
GAACAATGATCTTCTAATTCATTGGTTTTAGTTTCGATTCTAAAAAGAGATGAGTAAATAATTTTCT  
AGATCAGAAATACTACTTTTAACTACAAAAGCTTACGCTTTTAAACATTTTTTGTAAATAACA  
ACTATTGTTAATATTTGGCTGTCTATTGGTTTAACTAACAATTACAAAATTTTTCAATTTTTATAAT  
ATAAATTTAAATGAGAATATTAATAAAGTCATTATTATTAATAAATTAGTGAATCTTACCTTATCGA  
TGCGTCACAACCAAGTAACATTAGTTACTTGTGAAATTTTGGTTCATTATTAGCTGTTTGTAAAT  
AGTACAAATTATTACCGGTATTACATTAGCTATGCATTATAGTCCTAGTGTAATGGAAGCTTTTAA  
CTCAATAGAGCATATAATGAGAGATGTTAATAACGGGTGATTAGTTCGTTATCTACATAGTAATA  
CAGCTTCTGCTTTCTTTTCTTAGTGTATTTACACATAGGAAGAGGTATATATTACGGATCATATA

GAGCTCCTCGTACTTTAGTTTGAGCTATTGGTACTGTTATATTAATATTAATGATGGCTATCGGTT  
TCCTAGGTTATGTTTTACCTTATGGACAGATGTCATTATGAGGTGCTACAGTTATTACTAATCTTA  
TTAGTGCTATACCTGAATAGGGCAAGATATTGTTGAATTCATTTGAGGTGGTTTTCTGTAAATA  
ATGCCACTTTAAACAGATTTTTGCATTACATTTGTATTGCCTTTGTATTAGCTGCTTTAGTTTTA  
ATGCACTTAATTGCACTTCATGATACTGCTGGTTCAAGCAATCCTCTTGGTGTTCAGGTAATTAC  
GATAGAATTACATTTGCTCCATATTTTTATTTAAAGATTTAATTACTATTTTTATATTTATTTTGTA  
TTAAGTGCTTTTGTATTCTTTATGCCTAATGTTTTAGGGGATAGTGATAATTATATTATGGCTAATC  
CTATGCCAACTCCTGCTGCTATTGTACCTGAATGATACTTATTACCTTTCTATGCTATTTAAGATC  
TATACCTAATAAATTATTAGGTGTTATAGCGATGTTTAGTGCTATTTTAGCTATTATGTTATTACCT  
GTTACAGATTTAGGTAGATCTAGAGGTTTACAATTTAGACCATTTAGTAAAATAGCTTTCTGAGTT  
TTTGTTGCTAATTTCTTAGTTTTAATGCAATTAGGTGCTAAACACGTTGAAGATCCATTTATATTAT  
TAGGTCAATTAAGTACTGTATTATACTTTAGTTATTTTGTGCTATATTACCTTTAGCTAGTTACTT  
AGATAATAGTTTAACTGATTTATCTAATAAATCTGAATTATTTTAAATAAACTAACTAAATATAT  
TAAGATTATTATTTAATATATTTTCTATTTAAGATACTATTAATTTAGTATTTTGGGTTTTCAGTTTA  
TAATTTATATTATATTATGCATTACCCTCCACCTTGCTTTGTAGTAAGCTAATCTGTTATTTCTTTA  
GTTAATGGTAGAACAATGATCTTCTAATTCATTGGTTTTAGTTCGAATCTAAAAAGGAAATAAG  
AAATATATTCTTATTATTACTTATATAATAATTATTTCTTAAAAATATACATTTTGCATTATAGCCGT  
TTAGCTGTATTAATAATGTAAATGATATAAAATAGAATAAATATTTAAATTATTCCTATGTTATATT  
ATCCTATATTGCAACCATTATCAGAAGTTGTATTAATACTTGTACCTGCCTTATTAGCTGTAGCTT  
ATGTTACAGTTGCTGAAAGAAAACTATGGCTAGTATGCAAAGAAGATTAGGTCCTAATGCTGT  
AGGTTACTATGGACTATTGCAAGCATTTGCTGATGCCTTAAACTTTTTATTAAGAATATGTAG  
CTCCTACACAATCTAATATTGTTCTTTTCTTTTAGGTCCTGTAATAACTTTAATTTTGCATTATTA  
GGTTACGCTGTTATACCCTATGGTCCTGGTTCAGGGATAAGCGACATGAATTTAGGTATATTTA  
CATGTTAGCTGTGTCATCTTTAGCTACATACGGTATTCTATTAGCTGGTTGAAGTGCGAATAGTA  
AATACGCTTTTCTAGGTTCTCTTAGAAGTACAGCTCAATTAATTAGTTATGAATTAATATTAAGTT  
CAGCTATATTAATAGTAATTATGATAACAGGAAATTTAAATTTAACTGTTTGTACTGAATCTCAAA  
GAGCTATTTGATTTATACTACCTTTATTTCTGTGTTTATAATTTTTTCATAGGATCTATAGCTGA  
GACAAATAGAGCTCCTTTTGATTTAGCCGAGGCTAACCTGCTAATCTGGTTTGGTCTGGTTATAT  
GTCACAAATTGCTAGGAAACCTTTTTATTTAAAAACAAAAGACAATTAGCAGGAACTTAATTT  
AACCTAATTAATAATATTAGATAATTAACTCTTCATAGACTAAACGTGACAATTTAATATATATA  
TATATTTATTTATATATATGATTAATAAGATATAGTCAATCATCGGTGTGAATCGACTTAAAAAA  
AAAAGCACATGGGTAAACCCATCTCCCCTTATTAGGGGAATCAGAACTTGTTAGTGGGTTTCAT  
GACAGAGCATGCTGCCGTAGTTTTCGTATTCTTCTTTTAGCTGAGTACGGTAGTATTGTACTAAT  
GTGTATTTTAACTAGTATATTATTTATTGGTGGTTACTTATTATTTGAAATATCCTATGTTTTACTG  
TGGTAAATTATATTTCTTTGAATTATTCTTTATAGACTGAGTAACATTTGTAGAGGTACAATCTTT  
ATACACTGATTTTTTAAATAATTCTATCATTGAAGGATTATTATATGGGTTTAACTAGGATTA  
AAGTTCTTTAATGATATTCACATTTATTTGAGCTAGAGCATCCTTCCCTAGAATACGATTTGATCA  
ACTAATGGGCTTCTGTTGAACAGTTTTATTACCTATTAATTTTGCAATTATTATATTAGTACCTTGT  
GTTTTATATAGTTTTAACTTATTACCTGTAAATATACCATTGTTCTAGCTCACACACCCGCCGCC  
CTACTGCCACAAGGCTACAGTACATATGAGGAGGGGAACTAAAGATCTAGAACTATCCTAGTTA  
ATAATTACACTTAATAGTATACTAAATAGACCATCTATCATACTCGAGAATAGTGATAGTGTAAT  
TATACACTATTTTAACTGTATTCTACACTATTAGGATATTATTATCTTTATATGATAATAATTTTATA  
ACTTAATTTATTAGGTTACATTAACAAAAAATTCGTTAACTTTTTTCACCACTTTTAAATACAAAAT  
ACGAATTTA

>YN094

ATAACAATTCTAAAGAACATAAAGAGTTATTAGATAAAAAATAATTCACCTATACAGTTAATAAAT  
CAACTTAAAGGGTATTTTTTCATAAATCCTTTATTAGCTTTAAGTTTAGCTATTACTATTTCTCTTT  
TGCAGGTATTCCTCCTCTTGAGGGTCTTTGCTAAACAGATGGTATTAAGCGCGGCTATTGATC  
AAGGTTATATCTTTTTATCTTTAGTTGCAATATTAAGTGTATAGGAGGGGTTTATTATTTAAA  
TATAATTAAGAAATGTTCTTTTATTCACCTGACTATAAATTAACGAAGAAATTAATAAATAC  
TATTAATGGTCAAATTATTAATAGAAACAATAAAATATTAATGTTGAATTAATTATACAAATGT  
AGTTATGTCTAGTTCTGTGGCAATAACTATTTCTACTATTACATTAGTAGTTTTATTATTCATGTTT  
ATGAATAAAGAATGATTAAGTCTGGGTACTATATTGGTACAATCTTTATTTAGCTATTAATGAGTA  
GTATGACATTATTTATAGGGTTTGTATCTGTTATAGCTATTTTATTTTAGCCATTAATTTATATTT  
GCTCCTCATAATCCTTATCAAGAAAAATATAGTATTTTCGAGTGTGGTTTCCATAGTTTTTTAGGG  
CAAAATAGAACACAATTCGGTATAAAATTCCTTTATTTTGTCTTAGTTTATTTACTTTTAGATTTAG  
AAATATTATTAACTTTCCCTTTCGCTCTTAGTGAGTATGTTAATGGTATTTATGGTCTTTTAGTTAC  
TTTAATTTTTATAGCTATAATAACTATAGGATTTATATTTGAATTAGGTAAAAGCGCTCTTAAATA  
GACAGCAGACAAAAATTATATATACCTAAATTGAACGTTAATTACCATACAGAGTATGTTGGAAT  
AGGTAAGGTTTCTAAGTAAAGTTATAGAGGCAGAAAACCAAAAAACCTACCAAAGGGTAGCTA  
ATGGGAAGCTATTAATAAATAAAGATGATAACCTATATATAGTATAGTTACTATATATTTACTATA  
ACTAGGATTATTATATATATATATATTATCTTATTGTATATTAAGATTATTATTATTATAAGGTATA  
ATTAATATAGTATCTTATTGTATAAGAATATAATATATTAACCTATAATTAATTTATTTTTAATTT  
TTAATTATAATTTTTTTTTATATCTAGATGCTTACACATCTACAGATGTAGAAGAGAACAAAATAT  
TGTTGTTATAGTAGTGATATAGAAAAATATTTTTATATTATTTATTTTGTAGGTAGCTTTT  
GAAGTGTTTGATAGAGAGGATATATGGACGGTAGGAGGGTATTCATTTTAATGAACAGTGGATA  
GTTTAAATTAACCTAGTTATAGTTTATGAATTTAAATTATAATTATATTAATGTAGGTATGATAGA  
ATTATGTATTGATCCTTAAGAGTTAAGAGAGATACGCCACGTATAATACATATTGGTTTAGGGT  
TGAGTATATATACTTAAGAGTTAAGAATATATATATACAATATATAATAAATATAGTAATATATTA  
ATGGTATGGACTTAACCAGGTTTATATTATCATTGATAAACATTAATTATAATTTTTCTATTTA  
TTATTATTATTATACTGTGAGATTAATAATTATTAATAATATTACATAGTACGTGATATTTGG  
GGATTTTATCTTATTAATTGGCAATTAATGATTCTAATCAAATTTTATTCTCTTAGTTTAATGGTA  
GAACAATGATCTTCTAATTCATTGGTTTTAGTTGATTCTAAAAAGAGATGAGTAAATAATTTTCT  
AGATCAGAAATACTACTTTTAACTACAAAAAGCTTACGCTTTTAAACATTTTTTGATAAATAACA  
ACTATTGTTAATATTTGGCTGTCTATTGGTTTAACTACAATTACAAAATTTTTCAATTTTTATAAT  
ATAAATTTAAATGAGAATATTAATAAAGTCATTCAATTATTAATAAATTAGTGAATTCTACCTTATCGA  
TGCGTCACAACCAAGTAACATTAGTTACTTGTGAAATTTTGGTTCATTATTAGCTGTTTGTTAAT  
AGTACAAATTATTACCGGTATTACATTAGCTATGCATTATAGTCCTAGTGAATGGAAGCTTTTAA  
CTCAATAGAGCATATAATGAGAGATGTTAATAACGGGTGATTAGTTCGTTATCTACATAGTAATA  
CAGCTTCTGCTTTCTTTTCTTAGTGATTTACACATAGGAAGAGGTATATATTACGGATCATATA  
GAGCTCCTCGTACTTTAGTTTGAGCTATTGGTACTGTTATATTAATTAATGATGGCTATCGGTT  
TCCTAGGTTATGTTTTACCTTATGGACAGATGTCATTATGAGGTGCTACAGTTATTACTAATCTTA  
TTAGTGCTATACCTGAATAGGGCAAGATATTGTTGAATTCATTTGAGGTGGTTTTTCTGTTAATA  
ATGCCACTTTAAACAGATTTTTTGCAATTACATTTGTATTGCCTTTGTATTAGCTGCTTAGTTTA  
ATGCACTTAATTGCACTTCATGATACTGCTGGTTCAAGCAATCCTCTTGGTGTTTCAGGTAATTAC  
GATAGAATTACATTTGCTCCATATTTTTATTTAAAGATTTAATTACTATTTTTATATTTATTTTGT  
TTAAGTGCTTTTGATTCTTTATGCCTAATGTTTTAGGGGATAGTGATAATTATATTATGGCTAATC  
CTATGCAAACCTCCTGCTGCTATTGTACCTGAATGATACTTATTACCTTTCTATGCTATTTTAAGATC

TATACCTAATAAATTATTAGGTGTTATAGCGATGTTTAGTGCTATTTTAGCTATTATGTTATTACCT  
GTTACAGATTTAGGTAGATCTAGAGGTTTACAATTTAGACCATTTAGTAAAATAGCTTTCTGAGTT  
TTTGTTGCTAATTTCTTAGTTTTAATGCAATTAGGTGCTAAACACGTTGAAGATCCATTTATATTAT  
TAGGTCAATTAAGTACTGTATTATACTTTAGTTATTTTGTGCTATATTACCTTTAGCTAGTTACTT  
AGATAATAGTTTAACTGATTTATCTAATAAATCTGAATTATTTTAAATAAACTAACTAAATATAT  
TAAGATTATTATTTAATATATTTTCTATTTAAGATACTATTAATTTAGTATTTTGGGTTTTAGTTTA  
TAATTTATATTATATTATGCATTACCCTCCACCTTGCTTTGTAGTAAGCTAATCTGTTATTTCTTTA  
GTTTAATGGTAGAACAATGATCTTCTAATTCATTGGTTTTAGTTCGAATCTAAAAAGGAAATAAG  
AAATATATTCTTATTATTACTTATATAATAATTATTTCTTAAAAATATACATTTTGCATTATAGCCGT  
TTAGCTGTATTTAAATGTAAATGATATAAAATAGAATAAATATTTAAATTATTCCTATGTTATATT  
ATCCTATATTGCAACCATTATCAGAAGTTGTATTAATACTTGTACCTGCCTTATTAGCTGTAGCTT  
ATGTTACAGTTGCTGAAAGAAAACTATGGCTAGTATGCAAAGAAGATTAGGTCCTAATGCTGT  
AGGTTACTATGGACTATTGCAAGCATTGCTGATGCCTTAAACTTTTTATTAAAGAATATGTAG  
CTCCTACACAATCTAATATTGTTCTTTTCTTTTAGGTCCTGTAATAACTTTAATTTTTGCATTATTA  
GGTTACGCTGTTATACCCTATGGTCCTGGTTCAGGGATAAGCGACATGAATTTAGGTATATTTTA  
CATGTTAGCTGTGTCATCTTTAGCTACATACGGTATTCTATTAGCTGGTTGAAGTGCGAATAGTA  
AATACGCTTTTCTAGGTTCTCTTAGAAGTACAGCTCAATTAATTAGTTATGAATTAATATTAAGTT  
CAGCTATATTAATAGTAATTATGATAACAGGAAATTTAAATTTAACTGTTTGTACTGAATCTCAAA  
GAGCTATTTGATTTATACTACCTTTATTTCTGTGTTTATAATATTTTTCATAGGATCTATAGCTGA  
GACAAATAGAGCTCCTTTTGATTTAGCCGAGGCTAACCTGCTAATCTGGTTTGGTCTGGTTATAT  
GTCACAAATTGCTAGGAAACCTTTTTATTTTAAAAACAAAAGACAATTAGCAGGAACTTAATTT  
AACCTAATTAATAAATTAGATAATTAACTCTTCATAGACTAAACGTGACAATTTAATATATATA  
TATATTTATTTATATATATGATTAATAAGATATAGTCAATCATCGGTGTGAATCGACTTAAAAAA  
AAAAGCACATGGGTAAACCCATCTCCCCTTATTAGGGGAATCAGAACTTGTTAGTGGGTTTCAT  
GACAGAGCATGCTGCCGTAGTTTTCGTATTCTTCTTTTAGCTGAGTACGGTAGTATTGTACTAAT  
GTGTATTTTAACTAGTATATTATTTATTGGTGGTTACTTATTATTTGAAATATCCTATGTTTTACTG  
TGGTAAATTATATTTTCTTTGAATTATTCTTTATAGACTGAGTAACATTTGTAGAGGTACAATCTTT  
ATACACTGATTTTTTAAATAATTCTATCATTGAAGGATTATTATATGGGTTTAACTAGGATTAAA  
AAGTTCTTTAATGATATTCACATTTATTTGAGCTAGAGCATCCTTCCCTAGAATACGATTTGATCA  
ACTAATGGGCTTCTGTTGAACAGTTTTATTACCTATTAATTTTGCAATTATTATATTAGTACCTTGT  
GTTTTATATAGTTTTAACTTATTACCTGTAAATATACCATTGTTCTAGCTCACACACCCGCCGCC  
CTACTGCCACAAGGCTACAGTACATATGAGGAGGGGAATAAGATCTAGAATACTATCCTAGTTA  
ATAATTACACTTAATAGTATACTAAATAGACCATCTATCATACTCGAGAATAGTGATAGTGTAAT  
TATACACTATTTTAACTGTATTCTACACTATTAGGATATTATTATCTTTATATGATAATAATTTTATA  
ACTTAATTTATTAGGTTACATTAACAAAAAATTCGTTAACTTTTTTCACCACTTTTAAATACAAAAAT  
ACGAATTTTA

>YN097

ATAACAATTCTAAAGAACATAAAGAGTTATTAGATAAAAAATAATTCACCTATACAGTTAATAAAT  
CAACTTAAAGGGTATTTTTTCATAAATCCTTTATTAGCTTTAAGTTTAGCTATTACTATTTTCTCTTT  
TGCAGGTATTCCTCCTCTGTAGGGTTCTTTGCTAAACAGATGGTATTAAGCGCGGCTATTGATC  
AAGGTTATATCTTTTATCTTTAGTTGCAATATTAAGTGTATAGGAGGGGTTTATTATTTAAA  
TATAATTAAGAAATGTTCTTTTATTCACCTGACTATAAATTAACGAAGAAATTAATAAATAC  
TATTAATGGTCAAATTATTAATAGAAACAATAAAATATTAATGTTGAATTTAATTATACAAATGT  
AGTTATGTCTAGTTCTGTGGCAATAACTATTTCTACTATTACATTAGTAGTTTTATTATTCATGTTT

ATGAATAAAGAATGATTAAGTCTGGGTACTATATTGGTACAATCTTTATTTAGCTATTAATGAGTA  
GTATGACATTATTTATAGGGTTTGTATCTGTTATAGCTATTTTATTTTATAGCCATTAATTTTATATTT  
GCTCCTCATAATCCTTATCAAGAAAAATATAGTATTTTCGAGTGTGGTTTCCATAGTTTTTATAGG  
CAAAATAGAACACAATTCGGTATAAAATTCCTTATTTTTCGCTTTAGTTTATTTACTTTTATAGATTTAG  
AAATATTATTAACCTTTCCCTTTTCGCTCTTAGTGAGTATGTTAATGGTATTTATGGTCTTTTATAGTTAC  
TTTAATTTTATAGCTATAATAACTATAGGATTTATATTTGAATTAGGTAAAAGCGCTCTTAAAATA  
GACAGCAGACAAAAATTATATATACCTAAATTGAACGTTAATTACCATACAGAGTATGTTGGAAT  
AGGTAAGGTTTCTAAGTAAAGTTATAGAGGCAGAAAACCAAAAAACCTACCAAAGGGTAGCTA  
ATGGGAAGCTATTAATAAATAAAGATGATAACCTATATATAGTATAGTTACTATATATTTACTATA  
ACTAGGATTATTATATATATATATATTATCTTATTGTATATTAAGATTATTATTATAAGGTATA  
ATTAATATAGTATCTTATTGTATAAGAATATAATATATTAACCTATAATTAATTTTATTTTAAATTT  
TTAATTATAATTTTTTTTTTATATCTAGATGCTTACACATCTACAGATGTAGAAGAGAACAAAATAT  
TGTTGTTATAGTAGTGGATGATATAGAAAAATATTTTATATTATTTATTTTGTAGGTAGCTTTT  
GAAGTGTTGATAGAGAGGATATATGGACGGTAGGAGGGTATTCATTTTAATGAACAGTGGATA  
GTTTAAATTAACCTAGTTATAGTTTATGAATTTAAATTATAATTATATTAATGTAGGTATGATAGA  
ATTATGTATTGATCCTTAAGAGTTAAGAGAGATACGCCACGTATAATACATATTGGTTTAGGGT  
TGAGTATATATACTTAAGAGTTAAGAATATATATATACAATATATAATAAATATAGTAATATATTA  
ATGGTATGGACTTAACCAGGTTTATATATTATCATTTGATAAACATTAATTATAATTTTCTATTTA  
TTATTATTATTACTGTGAGATTAATAATTATTAATAATATAATTACATAGTACGTGATATTTGG  
GGATTTTATCTTATTAATTGGCAATTAATGATTCTAATCAAATTTTATTCTCTTTAGTTTAAATGGTA  
GAACAATGATCTTCTAATTCATTGGTTTTAGTTTCGATTCTAAAAAGAGATGAGTAAATAATTTTCT  
AGATCAGAAATACTACTTTTAACTACAAAAAGCTTACGCTTTTAAACATTTTTTTGATAAATAACA  
ACTATTGTTAATATTTGGCTGTCTATTGGTTTAACTACAATTACAAAATTTTTCAATTTTATAAT  
ATAAATTTAAATGAGAATATTAATAAAGTCATTCAATTATTAATAATTAGTGAATTCTTACCTTATCGA  
TGCGTCACAACCAAGTAACATTAGTTACTTGTGAAATTTTGGTTCATTATTAGCTGTTTGTTAAT  
AGTACAAATTATTACCGGTATTACATTAGCTATGCATTATAGTCCTAGTGTAATGGAAGCTTTTAA  
CTCAATAGAGCATATAATGAGAGATGTTAATAACGGGTGATTAGTTCGTTATCTACATAGTAATA  
CAGCTTCTGCTTTCTTTTCTTAGTGATTATACACATAGGAAGAGGTATATATTACGGATCATATA  
GAGCTCCTCGTACTTTAGTTTGAGCTATTGGTACTGTTATATTAATTAATGATGGCTATCGGT  
TCCTAGGTATGTTTTACCTTATGGACAGATGTCATTATGAGGTGCTACAGTTATTACTAATCTTA  
TTAGTGCTATACCTGAATAGGGCAAGATATTGTTGAATTCATTTGAGGTGGTTTTCTGTAAATA  
ATGCCACTTTAAACAGATTTTTGCATTACATTTGTATTGCCTTTTGTATTAGCTGCTTTAGTTTAA  
ATGCACTTAATTGCACTTCATGATACTGCTGGTTCAAGCAATCCTCTTGGTGTTTCAGGTAATTAC  
GATAGAATTACATTTGCTCCATATTTTTATTTAAAGATTTAATTACTATTTTATATTTATTTTGT  
TTAAGTGCTTTTGTATTCTTTATGCCTAATGTTTTAGGGGATAGTGATAATTATATTATGGCTAATC  
CTATGCAAACCTCCTGCTGCTATTGTACCTGAATGATACTTATTACCTTCTATGCTATTTTAAAGATC  
TATACCTAATAAATTATTAGGTGTTATAGCGATGTTTAGTGCTATTTTAGCTATTATGTTATTACCT  
GTTACAGATTTAGGTAGATCTAGAGGTTTACAATTTAGACCATTTAGTAAATAGCTTTCTGAGTT  
TTTGTTGCTAATTTCTTAGTTTTAATGCAATTAGGTGCTAAACACGTTGAAGATCCATTTATATTAT  
TAGGTCAATTAAGTACTGTATTATACTTTAGTTATTTTGTGCTATATTACCTTTAGCTAGTTACTT  
AGATAATAGTTTAACTGATTTATCTAATAAATCTGAATTATTTTAAATAAACTAACTAAATATAT  
TAAGATTATTATTTAATATATTTTCTATTTAAGATACTATTAATTTAGTATTTTGGGTTTTAGTTTA  
TAATTTATATTATATTATGCATTACCTCCACCTTGCTTTGTAGTAAGCTAATCTGTTATTTCTTTA  
GTTAATGGTAGAACAAATGATCTTCTAATTCATTGGTTTTAGTTTGAATCTAAAAAGGAAATAAG

AAATATATTCTTATTATTACTTATATAATAATTATTTCTTAAAAATATACATTTTGCATTATAGCCGT  
TTAGCTGTATTAAAATGTAAAATGATATAAAATAGAATAAAATATTTAAATTATTCCTATGTTATATT  
ATCCTATATTGCAACCATTATCAGAAGTTGTATTAATACTTGTACCTGCCTTATTAGCTGTAGCTT  
ATGTTACAGTTGCTGAAAGAAAACTATGGCTAGTATGCAAAGAAGATTAGGTCCTAATGCTGT  
AGGTTACTATGGACTATTGCAAGCATTTGCTGATGCCTTAAAACTTTTATTAAGAATATGTAG  
CTCCTACACAATCTAATATTGTTCTTTTCTTTTAGGTCCTGTAATAACTTTAATTTTGCATTATTA  
GGTTACGCTGTTATACCCTATGGTCCTGGTTCAGGGATAAGCGACATGAATTTAGGTATATTTTA  
CATGTTAGCTGTGTCATCTTTAGCTACATACGGTATTCTATTAGCTGGTTGAAGTGCGAATAGTA  
AATACGCTTTTCTAGGTTCTCTTAGAAGTACAGCTCAATTAATTAGTTATGAATTAATATTAAGTT  
CAGCTATATTAATAGTAATTATGATAACAGGAAATTTAAATTTAACTGTTTGTACTGAATCTCAAA  
GAGCTATTTGATTTATACTACCTTTATTTCTGTGTTTATAATATTTTTCATAGGATCTATAGCTGA  
GACAAATAGAGCTCCTTTTGATTTAGCCGAGGCTAACCTGCTAATCTGGTTTGGTCTGGTTATAT  
GTCACAAATTGCTAGGAAACCTTTTTATTTAAAAACAAAAGACAATTAGCAGGAAACTTAATTT  
AACCTAATTAATAATTAGATAATTAACCTCTTCATAGACTAAACGTGACAATTTAATATATATA  
TATATTTATTTATATATATGATTAATAAGATATAGTCAATCATCGGTGTGAATCGACTTAAAAAA  
AAAAGCACATGGGTAAACCCATCTCCCTTATTAGGGGAATCAGAACTTGTTAGTGGGTTTCAT  
GACAGAGCATGCTGCCGTAGTTTTCGTATTCTTCTTTTAGCTGAGTACGGTAGTATTGTACTAAT  
GTGTATTTTAACTAGTATATTATTTATTGGTGGTTACTTATTATTTGAAATATCCTATGTTTTACTG  
TGGTAAATTATATTTTCTTTGAATTATTCTTTATAGACTGAGTAACATTTGTAGAGGTACAATCTTT  
ATACACTGATTTTTTAAATAATTCTATCATTGAAGGATTATTATATGGGTTAATCTAGGATTA  
AAGTTCTTTAATGATATTCACATTTATTTGAGCTAGAGCATCCTTCCCTAGAATACGATTTGATCA  
ACTAATGGGCTTCTGTTGAACAGTTTTATTACCTATTAATTTTGCAATTATTATATTAGTACCTTGT  
GTTTTATATAGTTTTAACTTATTACCTGTAAATATACCATTGTTCTAGCTCACACACCCGCCGCC  
CTACTGCCACAAGGCTACAGTACATATGAGGAGGGGAATAAGATCTAGAATACTATCCTAGTTA  
ATAATTACACTTAATAGTATACTAAATAGACCATCTATCATACTCGAGAATAGTGATAGTGTAAT  
TATACACTATTTTAACTGTATTCTACACTATTAGCATATTATTATCTTTATATGATAATAATTTTATA  
ACTTAATTTATTAGGTTACATTAACAAAAAATTCGTTAACTTTTTTACCACCTTTTAAACAAAAT  
ACGAATTTTA

>YN137

ATAACAATTCTAAAGAACATAAAGAGTTATTAGATAAAAAATAATTCACCTATACAGTTAATAAAT  
CAACTTAAAGGGTATTTTTTCATAAATCCTTTATTAGCTTTAAGTTTAGCTATTACTATTTTCTCTTT  
TGCAGGTATTCTCCTCTTGTAGGGTTCTTTGCTAAACAGATGGTATTAAGCGCGGCTATTGATC  
AAGGTTATATCTTTTATCTTTAGTTGCAATATTAAGTGTATAGGAGGGGTTTATTATTTAAA  
TATAATTAAGAAATGTTCTTTTATTCACCTGACTATAAATTAACGAAGAAATTAATAATAC  
TATTAATGGTCAAATTATTAATAGAAACAATAAAATATTAATGTTGAATTTAATTATACAAATGT  
AGTTATGTCTAGTTCTGTGGCAATAACTATTTCTACTATTACATTAGTAGTTTTATTATTCATGTTT  
ATGAATAAAGAATGATTAAGTCTGGGTACTATATTGGTACAATCTTTATTTAGCTATTAATGAGTA  
GTATGACATTATTTATAGGGTTGTATCTGTTATAGCTATTTTATTTTAGCCATTAATTTATATTT  
GCTCCTCATAATCCTTATCAAGAAAAATATAGTATTTTCGAGTGTGGTTCCATAGTTTTTTAGGG  
CAAAATAGAACACAATTCGGTATAAAATCTTTATTTTGCTTTAGTTTATTTACTTTTAGATTTAG  
AAATATTATTAACTTTCCCTTTCGCTCTTAGTGAGTATGTTAATGGTATTTATGGTCTTTTAGTTAC  
TTTAATTTTATAGCTATAATAACTATAGGATTTATATTTGAATTAGGTAAAAGCGCTCTTAAATA  
GACAGCAGACAAAATTATATATACCTAAATTGAACGTTAATTACCATACAGAGTATGTTGGAAT  
AGGTAAGGTTTCTAAGTAAAGTTATAGAGGCAGAAAACCAAAAAACCTACCAAGGGTAGCTA

ATGGGAAGCTATTA AAAAATAAAAGATGATAACCTATATATAGTATAGTTACTATATATTTACTATA  
ACTAGGATTATTATATATATATATATTATCTTATTGTATATTAAGATTATTATTATAAGGTATA  
ATTAATATAGTATCTTATTGTATAAGAATATAATATATTAACCTATAATTAATTTTATTTTTAATTT  
TTAATTATAATTTTTTTTTTATATCTAGATGCTTACACATCTACAGATGTAGAAGAGAACAAAATAT  
TGTTGTTATAGTAGTGGATGATATAGAAAAATATTTTTATATTATTTATTTTTGTTAGGTAGCTTTT  
GAAGTGTTTGATAGAGAGGATATATGGACGGTAGGAGGGTATTCATTTTAATGAACAGTGGATA  
GTTTAAATTAACCTAGTTATAGTTTATGAATTTAAATTATAATTATATTAATGTAGGTTATGATAGA  
ATTATGTATTGATCCTTAAGAGTTAAGAGAGATACGCCACGTATAATACATATTGGTTTAGGGT  
TGAGTATATATACTTAAGAGTTAAGAATATATATATACAATATATAATAAATATAGTAATATATTA  
ATGGTATGGACTTAACCAGGTTTATATATTATCATTTGATAAACATTAATTATAATTTTTCTATTTA  
TTATTATTATTACTGTGAGATTAATAATTATTA AAAATATAATATTACATAGTACGTGATATTTGG  
GGATTTTATCTTATTAATTGGCAATTAATGATTCTAATCAAATTTTATTCTCTTTAGTTTAATGGTA  
GAACAATGATCTTCTAATTCATTGGTTTTAGTTTCGATTCTAAAAAGAGATGAGTAAATAATTTTCT  
AGATCAGAAATACTACTTTTAACTACAAAAAGCTTACGCTTTTAAACATTTTTTTGATAAATAACA  
ACTATTGTTAATATTTGGCTGTCTATTGGTTTAACTAACAATTACAAAATTTTTCAATTTTTATAAT  
ATAAATTTAAATGAGAATATTA AAAAGTCATTCATTATTA AAATTAGTGAATTCCTACCTTATCGA  
TGCGTCACAACCAAGTAACATTAGTTACTTGTGAAATTTTGGTTCATTATTAGCTGTTTGTTAAT  
AGTACAAATTATTACCGGTATTACATTAGCTATGCATTATAGTCCTAGTGAATGGAAGCTTTTAA  
CTCAATAGAGCATATAATGAGAGATGTTAATAACGGGTGATTAGTTCGTTATCTACATAGTAATA  
CAGCTTCTGCTTTCTTTTTCTTAGTGTATTTACACATAGGAAGAGGTATATATTACGGATCATATA  
GAGCTCCTCGTACTTTAGTTTGAGCTATTGGTACTGTTATATTAATTAATGATGGCTATCGGTT  
TCCTAGGTTATGTTTTACCTTATGGACAGATGTCATTATGAGGTGCTACAGTTATTACTAATCTTA  
TTAGTGCTATACCTGAATAGGGCAAGATATTGTTGAATTCATTTGAGGTGGTTTTCTGTTAATA  
ATGCCACTTTAAACAGATTTTTTGCAATTACATTTGTATTGCCTTTTGTATTAGCTGCTTTAGTTTAA  
ATGCACTTAATTGCACTTCATGATACTGCTGGTTCAAGCAATCCTCTGGTGTTTCAGGTAATTAC  
GATAGAATTACATTTGCTCCATATTTTTATTTAAAGATTTAATTACTATTTTTATATTTATTTTTGTA  
TTAAGTGCTTTTGTATTCTTTATGCCTAATGTTTTAGGGGATAGTGATAATTATATTATGGCTAATC  
CTATGCAAACCTCTGCTGCTATTGTACCTGAATGATACTTATTACCTTTCTATGCTATTTTAAAGATC  
TATACCTAATAAATTATTAGGTGTTATAGCGATGTTTAGTGCTATTTTAGCTATTATGTTATTACCT  
GTTACAGATTTAGGTAGATCTAGAGGTTTACAATTTAGACCATTTAGTAAATAGCTTTCTGAGTT  
TTTGTTGCTAATTTCTTAGTTTAAATGCAATTAGGTGCTAAACACGTTGAAGATCCATTTATATTAT  
TAGGTCAATTAAGTACTGTATTATACTTTAGTTATTTTGTTGCTATATTACCTTTAGCTAGTTACTT  
AGATAATAGTTTAACTGATTTATCTAATAAATCTGAATTATTTTAAATAAACTAACTAAATATAT  
TAAGATTATTATTTAATATATTTTCTATTTAAGATACTATTAATTTAGTATTTTGGGTTTTCAGTTTA  
TAATTTATATTATATTATGCATTACCCTCCACCTTGCTTTGTAGTAAGCTAATCTGTTATTTCTTTA  
GTTTAATGGTAGAACAATGATCTTCTAATTCATTGGTTTTAGTTTGAATCTAAAAAGGAAATAAG  
AAATATATTCTTATTATTACTTATATAATAATTATTTCTTAAAAATATACATTTTGCATTATAGCCGT  
TTAGCTGTATTAAATGTAAATGATATAAAATAGAATAAATATTTAAATTATTCCTATGTTATATT  
ATCCTATATTGCAACCATTATCAGAAGTTGTATTAATACTTGTACCTGCCTTATTAGCTGTAGCTT  
ATGTTACAGTTGCTGAAAGAAAACTATGGCTAGTATGCAAAGAAGATTAGGTCCTAATGCTGT  
AGGTTACTATGGACTATTGCAAGCATTTGCTGATGCCTTAAACTTTTATTAAGAATATGTAG  
CTCCTACACAATCTAATATTGTTCTTTTCTTTTAGGTCCTGTAATAACTTTAATTTTTGCATTATTA  
GGTTACGCTGTTATACCCTATGGTCCTGGTTCAGGGATAAGCGACATGAATTTAGGTATATTTTA  
CATGTTAGCTGTGTCATCTTTAGCTACATACGGTATTCTATTAGCTGGTTGAAGTGCGAATAGTA

AATACGCTTTTCTAGGTTCTCTTAGAAGTACAGCTCAATTAATTAGTTATGAATTAATATTAAGTT  
CAGCTATATTAATAGTAATTATGATAACAGGAAATTTAAATTTAACTGTTTGTACTGAATCTCAAA  
GAGCTATTTGATTTATACTACCTTTATTTCCCTGTGTTTATAATATTTTTCATAGGATCTATAGCTGA  
GACAAATAGAGCTCCTTTTGATTTAGCCGAGGCTAACCTGCTAATCTGGTTTGGTCTGGTTATAT  
GTCACAAATTGCTAGGAAACCTTTTTATTTTAAAAACAAAAGACAATTAGCAGGAAACTTAATTT  
AACCTAATTAATAATATTAGATAATTAACTCTTCATAGACTAAACGTGACAATTTAATATATATA  
TATATTTATTTATATATATGATTAAATAAGATATAGTCAATCATCGGTGTGAATCGACTTAAAAAA  
AAAAGCACATGGGTAAACCCATCTCCCCTTATTAGGGGAATCAGAACTTGTTAGTGGGTTTCAT  
GACAGAGCATGCTGCCGTAGTTTTCGTATTCTTCTTTTGTAGCTGAGTACGGTAGTATTGTACTAAT  
GTGTATTTTAACTAGTATATTATTTATTGGTGGTTACTTATTATTTGAAATATCCTATGTTTTTACTG  
TGGTAAATTATATTTTCTTTGAATTATTCTTTATAGACTGAGTAACATTTGTAGAGGTACAATCTTT  
ATACACTGATTTTTTAAATAATTCTATCATTGAAGGATTATTATATGGGTTTAACTAGGATTA  
AAGTTCTTTAATGATATTCACATTTATTTGAGCTAGAGCATCCTTCCCTAGAATACGATTTGATCA  
ACTAATGGGCTTCTGTTGAACAGTTTTATTACCTATTAATTTTGAATTATTATATTAGTACCTTGT  
GTTTTATATAGTTTTAACTTATTACCTGTAAATATACCATTGTTCTAGCTCACACACCCGCCGCC  
CTACTGCCACAAGGCTACAGTACATATGAGGAGGGGAATAAGATCTAGAATACTATCCTAGTTA  
ATAATTACACTTAATAGTATACTAAATAGACCATCTATCATACTCGAGAATAGTGATAGTGTAAT  
TATACACTATTTTAACTGTATTCTACACTATTAGCATATTATTATCTTTATATGATAATAATTTTATA  
ACTTAATTTATTAGGTTACATTAACAAAAAATTCGTTAACTTTTTTCACCACTTTTTAATACAAAAT  
ACGAATTATA

>YN153

ATAACAATTCTAAAGAACATAAAGAGTTATTAGATAAAAAATAATTCACCTATACAGTTAATAAAT  
CAACTTAAAGGGTATTTTTTCATAAATCCTTTATTAGCTTTAAGTTTAGCTATTACTATTTTCTCTTT  
TGCAGGTATTCTCCTCTTGTAGGGTCTTTGCTAAACAGATGGTATTAAGCGCGGCTATTGATC  
AAGGTTATATCTTTTTATCTTTAGTTGCAATATTAAGTGTATAGGAGGGGTTTATTATTTAAA  
TATAATTAAGAAATGTTCTTTTATTCACCTGACTATAAATTAACGAAGAAATTAATAAATAC  
TATTAATGGTCAAATTATTAATAGAAACAATAAAATATTAATGTTGAATTTAATTATACAAATGT  
AGTTATGTCTAGTTCTGTGGCAATAACTATTTCTACTATTACATTAGTAGTTTTATTATTCATGTTT  
ATGAATAAAGAATGATTAAGTCTGGGTACTATATTGGTACAATCTTTATTTAGCTATTAATGAGTA  
GTATGACATTATTTATAGGGTTGTATCTGTTATAGCTATTTTATTTTAGCCATTAATTTATATTT  
GCTCCTCATAATCCTTATCAAGAAAAATATAGTATTTTCGAGTGTGGTTTCCATAGTTTTTTAGGG  
CAAAATAGAACACAATTCGGTATAAAATTCCTTTATTTTGTCTTAGTTTATTTACTTTTAGATTTAG  
AAATATTATTAACTTTCCCTTTCGCTCTTAGTGAGTATGTTAATGGTATTTATGGTCTTTTAGTTAC  
TTTAATTTTTTATAGCTATAATAACTATAGGATTTATATTTGAATTAGGTAAAAGCGCTCTTAAATA  
GACAGCAGACAAAAATTATATATACCTAAATTGAACGTTAATTACCATACAGAGTATGTTGGAAT  
AGGTAAGGTTTCTAAGTAAAGTTATAGAGGCAGAAAACCAAAAAACCTACCAAAGGGTAGCTA  
ATGGGAAGCTATTAATAAATAAAGATGATAACCTATATATAGTATAGTTACTATATATTTACTATA  
ACTAGGATTATTATATATATATATATTATCTTATTGTATATTAAGATTATTATTATAAGGTATA  
ATTAATATAGTATCTTATTGTATAAGAATATAATATATTAACCTATAATTAATTTTATTTTAAATTT  
TTAATTATAATTTTTTTTTATATCTAGATGCTTACACATCTACAGATGTAGAAGAGAACAAAATAT  
TGTTGTTATAGTAGTGATGATATAGAAAAATATTTTATATTATTTATTTTGTAGGTAGCTTTT  
GAAGTGTTGATAGAGAGGATATATGGACGGTAGGAGGGTATTCATTTTAAATGAACAGTGGATA  
GTTTAAATTAACCTAGTTATAGTTTATGAATTTAAATTATAATTATTAATGTAGGTTATGATAGA  
ATTATGTATTGATCCTTAAGAGTTAAGAGAGATACGCCACGTATAATACATATTGGTTTAGGGT

TGAGTATATATACTTAAGAGTTAAGAATATATATATACAATATATAATAAATATAGTAATATATTA  
ATGGTATGGACTTAACCAGGTTTATATATTATCATTTGATAAACATTAATTATAATTTTTCTATTTA  
TTATTATTATTACTGTGAGATTAATAATTATTAATAATATTACATAGTACGTGATATTTGG  
GGATTTTATCTTATTAATTGGCAATTAATGATTCTAATCAAATTTTATTCTCTTTAGTTTAAATGGTA  
GAACAATGATCTTCTAATTCATTGGTTTTAGTTCGATTCTAAAAAGAGATGAGTAAATAATTTTCT  
AGATCAGAAATACTACTTTTAACTACAAAAAGCTTACGCTTTTTAACATTTTTTGATAAATAACA  
ACTATTGTTAATATTTGGCTGTCTATTGGTTTAACTAACAATTACAAAATTTTTCAATTTTTATAAT  
ATAAATTTAAATGAGAATATTAATAAGTCATTCAATTATTAATAATTAGTGAATTCTTACCTTATCGA  
TGCGTCACAACCAAGTAACATTAGTTACTTGTGAAATTTTGGTTCATTATTAGCTGTTTGTTAAT  
AGTACAAATTATTACCGGTATTACATTAGCTATGCATTATAGTCCTAGTGAATGGAAGCTTTTAA  
CTCAATAGAGCATATAATGAGAGATGTTAATAACGGGTGATTAGTTCGTTATCTACATAGTAATA  
CAGCTTCTGCTTTCTTTTTCTTAGTGTATTTACACATAGGAAGAGGTATATATTACGGATCATATA  
GAGCTCCTCGTACTTTAGTTTGAGCTATTGGTACTGTTATTAATTAATGATGGCTATCGGTT  
TCCTAGGTTATGTTTTACCTTATGGACAGATGTCATTATGAGGTGCTACAGTTATTACTAATCTTA  
TTAGTGCTATACCTGAATAGGGCAAGATATTGTTGAATTCATTGAGGTGGTTTTCTGTTAATA  
ATGCCACTTTAAACAGATTTTTGCATTACATTTGTATTGCCTTTGTATTAGCTGCTTAGTTTTA  
ATGCACTTAATTGCACTTCATGATACTGCTGGTTCAAGCAATCCTCTTGGTGTTTCAGGTAATTAC  
GATAGAATTACATTTGCTCCATATTTTTATTTAAAGATTTAATTACTATTTTTATTTATTTTTGTA  
TTAAGTGCTTTTGATTCTTTATGCCTAATGTTTTAGGGGATAGTGATAATTATATTATGGCTAATC  
CTATGCCAACTCCTGCTGCTATTGTACCTGAATGATACTTATTACCTTTCTATGCTATTTAAGATC  
TATACCTAATAAATTATTAGGTGTTATAGCGATGTTTAGTGCTATTTAGCTATTATGTTATTACCT  
GTTACAGATTTAGGTAGATCTAGAGGTTTACAATTTAGACCATTTAGTAAATAGCTTTCTGAGTT  
TTTGTTGCTAATTTCTTAGTTTTAATGCAATTAGGTGCTAAACACGTTGAAGATCCATTATATTAT  
TAGGTCAATTAAGTACTGTATTATACTTTAGTTATTTTTGTTGCTATATTACCTTTAGCTAGTTACTT  
AGATAATAGTTTAACTGATTTATCTAATAAATCTGAATTATTTTAAATAAACTAACTAAATATAT  
TAAGATTATTATTTAATATATTTTCTATTTAAGATACTATTAATTTAGTATTTTGGGTTTTAGTTTA  
TAATTTATATTATATTATGCATTACCCTCCACCTTGCTTTGTAGTAAGCTAATCTGTTATTTCTTTA  
GTTTAATGGTAGAACAATGATCTTCTAATTCATTGGTTTTAGTTCGAATCTAAAAAGGAAATAAG  
AAATATATTCTTATTATTACTTATATAATAATTATTTCTTAAAAATATACATTTTGCATTATAGCCGT  
TTAGCTGTATTAAATGTAAATGATATAAAATAGAATAAATATTTAAATTATTCCTATGTTATATT  
ATCCTATATTGCAACCATTATCAGAAGTTGATTAATACTTGTACCTGCCTTATTAGCTGTAGCTT  
ATGTTACAGTTGCTGAAAGAAAACTATGGCTAGTATGCAAAGAAGATTAGGTCCTAATGCTGT  
AGGTTACTATGGACTATTGCAAGCATTTGCTGATGCCTTAAACTTTTTATTAAGAATATGTAG  
CTCCTACACAATCTAATATTGTTCTTTCTTTTAGGTCCTGTAATAACTTTAATTTTTGCATTATTA  
GGTTACGCTGTTATACCCTATGGTCCTGGTTCAGGGATAAGCGACATGAATTTAGGTATATTTTA  
CATGTTAGCTGTGTCATCTTTAGCTACATACGGTATTCTATTAGCTGGTTGAAGTGCGAATAGTA  
AATACGCTTTTCTAGGTTCTCTTAGAAGTACAGCTCAATTAATTAGTTATGAATTAATATTAAGTT  
CAGCTATATTAATAGTAATTATGATAACAGGAAATTTAAATTTAACTGTTTGTACTGAATCTCAAA  
GAGCTATTTGATTTATACTACCTTTATTTCTGTGTTTATAATTTTTTCATAGGATCTATAGCTGA  
GACAAATAGAGCTCCTTTGATTTAGCCGAGGCTAACCTGCTAATCTGGTTTGGTCTGGTTATAT  
GTCACAAATTGCTAGGAAACCTTTTTATTTAAAAACAAAAGACAATTAGCAGGAACTTAATTT  
AACCTAATTAATAATATTAGATAATTAACTCTTCATAGACTAAACGTGACAATTTAATATATATA  
TATATTTATTTATATATATGATTAAATAAGATATAGTCAATCATCGGTGTGAATCGACTTAAAAAA  
AAAAGCACATGGGTAAACCCATCTCCCCTTATTAGGGGAATCAGAACTTGTTAGTGGGTTTCAT

GACAGAGCATGCTGCCGTAGTTTTCGTATTCTTCTTTTAGCTGAGTACGGTAGTATTGTACTAAT  
GTGTATTTAACTAGTATATTATTTATTGGTGGTTACTTATTATTTGAAATATCCTATGTTTTACTG  
TGGTAAATTATATTTTCTTTGAATTATTCTTTATAGACTGAGTAACATTTGTAGAGGTACAATCTTT  
ATACACTGATTTTTTAAATAATTCTATCATTGAAGGATTATTATATGGGTTTAATCTAGGATTAAA  
AAGTTCTTTAATGATATTCACATTTATTTGAGCTAGAGCATCCTTCCCTAGAATACGATTTGATCA  
ACTAATGGGCTTCTGTTGAACAGTTTTATTACCTATTAATTTTGCAATTATTATATTAGTACCTTGT  
GTTTTATATAGTTTTAACTTATTACCTGTAAATATACCATTGTTCTAGCTCACACACCCGCCGCC  
CTACTGCCACAAGGCTACAGTACATATGAGGAGGGGAATAAGATCTAGAATACTATCCTAGTTA  
ATAATTACACTTAATAGTATACTAAATAGACCATCTATCATACTCGAGAATAGTGATAGTGTAAT  
TATACACTATTTTAACTGTATTCTACACTATTAGCATATTATTATCTTTATATGATAATAATTTTATA  
ACTTAATTTATTAGGTTACATTAACAAAAAATTCGTTAACTTTTTTCACCACTTTTAAATACAAAAT  
ACGAATTATA

>YN154

ATAACAATTCTAAAGAACATAAAGAGTTATTAGATAAAAAATAATTCACCTATACAGTTAATAAAT  
CAACTTAAAGGGTATTTTTTCATAAATCCTTTATTAGCTTTAAGTTTAGCTATTACTATTTTCTCTTT  
TGCAGGTATTCCTCCTCTGTAGGGTTCTTTGCTAAACAGATGGTATTAAGCGCGGCTATTGATC  
AAGGTTATATCTTTTTATCTTTAGTTGCAATATTAAGTGTATAGGAGGGGTTTATTATTTAAA  
TATAATTAAGAAATGTTCTTTTATTCACCTGACTATAAATTAACGAAGAAATTAATAAATAC  
TATTAATGGTCAAATTATTAATAGAAACAATAAAATATTAAATGTTGAATTTAATTATACAAATGT  
AGTTATGTCTAGTTCTGTGGCAATAACTATTTCTACTATTACATTAGTAGTTTTATTATTCATGTTT  
ATGAATAAAGAATGATTAAGTCTGGGTACTATATTGGTACAATCTTTATTTAGCTATTAATGAGTA  
GTATGACATTATTTATAGGGTTTGTATCTGTTATAGCTATTTTATTTTAGCCATTAATTTTATATTT  
GCTCCTCATAATCCTTATCAAGAAAAATATAGTATTTTCGAGTGTGGTTTCCATAGTTTTTTAGGG  
CAAAATAGAACACAATTCGGTATAAAATCTTTATTTTTGCTTTAGTTTATTTACTTTTAGATTTAG  
AAATATTATTAACTTTCCCTTTCGCTCTTAGTGAGTATGTTAATGGTATTTATGGTCTTTTAGTTAC  
TTTAATTTTTATAGCTATAATAACTATAGGATTTATATTTGAATTAGGTAAAAGCGCTCTTAAATA  
GACAGCAGACAAAAATTATATATACCTAAATTGAACGTTAATTACCATACAGAGTATGTTGGAAT  
AGGTAAGGTTTCTAAGTAAAGTTATAGAGGCAGAAAACCAAAAAACCTACCAAAGGGTAGCTA  
ATGGGAAGCTATTAATAAATAAAGATGATAACCTATATATAGTATAGTTACTATATATTTACTATA  
ACTAGGATTATTATATATATATATATTATCTTATTGTATATTAAGATTATTATTATAAGGTATA  
ATTAATATAGTATCTTATTGTATAAGAATATAATATATTAACCTATAATTAATTTTATTTTTAATTT  
TTAATTATAATTTTTTTTTATATCTAGATGCTTACACATCTACAGATGTAGAAGAGAACAAAATAT  
TGTTGTTATAGTAGTGGATGATATAGAAAAATATTTTTATATTATTTATTTTGTAGGTAGCTTTT  
GAAGTGTGATAGAGAGGATATATGGACGGTAGGAGGGTATTCATTTTAATGAACAGTGGATA  
GTTTAAATTAACCTAGTTATAGTTTATGAATTTAAATTATAATTATATTAATGTAGGTATGATAGA  
ATTATGTATTGATCCTTAAGAGTTAAGAGAGATACGCCACGTATAATACATATTGGTTTAGGGT  
TGAGTATATATACTTAAGAGTTAAGAATATATATATACAATATATAATAAATATAGTAATATATTA  
ATGGTATGGACTTAACCAGGTTTATATATTATCATTGATAAACATTAATTATAATTTTCTATTTA  
TTATTATTATTACTGTGAGATTAATAATTATTAATAATATTACATAGTACGTGATATTTGG  
GGATTTTATCTTATTAATTGGCAATTAATGATTCTAATCAAATTTTATTCTCTTTAGTTTAAATGGTA  
GAACAATGATCTTCTAATTCATTGGTTTTAGTTTCGATTCTAAAAAGAGATGAGTAAATAATTTTCT  
AGATCAGAAATACTACTTTTAACTACAAAAAGCTTACGCTTTTTAACATTTTTTTGATAAATAACA  
ACTATTGTTAATATTTGGCTGTCTATTGGTTTAACTACAATTACAAAATTTTTCAATTTTTATAAT  
ATAAATTTAAATGAGAATATTAATAAAGTCATTCAATTATTAATAATTAGTGAATTCTTACCTTATCGA

TGCGTCACAACCAAGTAACATTAGTTACTTGTGAAATTTTGGTTCATTATTAGCTGTTTGTTAAT  
AGTACAAATTATTACCGGTATTACATTAGCTATGCATTATAGTCCTAGTGTAATGGAAGCTTTTAA  
CTCAATAGAGCATATAATGAGAGATGTTAATAACGGGTGATTAGTTCGTTATCTACATAGTAATA  
CAGCTTCTGCTTTCTTTTCTTAGTGATTTACACATAGGAAGAGGTATATATTACGGATCATATA  
GAGCTCCTCGTACTTTAGTTTGAGCTATTGGTACTGTTATTAATTAATGATGGCTATCGGT  
TCCTAGGTTATGTTTACCTTATGGACAGATGTCATTATGAGGTGCTACAGTTACTAATCTTA  
TTAGTGCTATACCTGAATAGGGCAAGATATTGTTGAATTCATTTGAGGTGGTTTTCTGTTAATA  
ATGCCACTTTAAACAGATTTTTGCATTACATTTGTATTGCCTTTGTATTAGCTGCTTTAGTTTA  
ATGCACTTAATTGCACTTCATGATACTGCTGGTTCAAGCAATCCTCTGGTGTTTCAGGTAATTAC  
GATAGAATTACATTTGCTCCATATTTTTATTTAAAGATTTAATTACTATTTTTATTTATTTTTGTA  
TTAAGTGCTTTGTATTCTTTATGCCTAATGTTTAGGGGATAGTGATAATTATATTATGGCTAATC  
CTATGCAAACCTCCTGCTGCTATTGTACCTGAATGATACTTATTACCTTTCTATGCTATTTAAGATC  
TATACCTAATAAATTATTAGGTGTTATAGCGATGTTTAGTGCTATTTAGCTATTATGTTATTACCT  
GTTACAGATTTAGGTAGATCTAGAGGTTTACAATTTAGACCATTTAGTAAATAGCTTTCTGAGTT  
TTTGTTGCTAATTTCTTAGTTTTAATGCAATTAGGTGCTAAACACGTTGAAGATCCATTTATATTAT  
TAGGTCAATTAAGTACTGTATTATACTTTAGTTATTTTGTTGCTATATTACCTTTAGCTAGTTACTT  
AGATAATAGTTTAACTGATTTATCTAATAAATCTGAATTATTTTAAATAAAACTAACTAAATATAT  
TAAGATTATTATTTAATATATTTCTATTTAAGATACTATTAATTTAGTATTTTGGGTTTTAGTTTA  
TAATTTATATTATATTATGCATTACCCTCCACCTTGCTTTGTAGTAAGCTAATCTGTTATTTCTTTA  
GTTTAATGGTAGAACAATGATCTTCTAATTCATTGGTTTTAGTTTGAATCTAAAAAGGAAATAAG  
AAATATATTCTTATTATTACTTATATAATAATTATTTCTTAAAAATATACATTTTGCAATTATAGCCGT  
TTAGCTGTATTAAATGTAAATGATATAAAATAGAATAAATATTTAAATTATTCCTATGTTATATT  
ATCCTATATTGCAACCATTATCAGAAGTTGTATTAATACTTGTACCTGCCTTATTAGCTGTAGCTT  
ATGTTACAGTTGCTGAAAGAAAACTATGGCTAGTATGCAAAGAAGATTAGGTCCTAATGCTGT  
AGGTTACTATGGACTATTGCAAGCATTGCTGATGCCTTAAACTTTTATTTAAAGAATATGTAG  
CTCCTACACAATCTAATATTGTTCTTTTCTTTTAGGTCTGTAAATAACTTTAATTTTGCAATTATA  
GGTTACGCTGTTATACCCTATGGTCCTGGTTCAGGGATAAGCGACATGAATTTAGGTATATTTTA  
CATGTTAGCTGTGTCATCTTTAGCTACATACGGTATTCTATTAGCTGGTTGAAGTGCGAATAGTA  
AATACGCTTTTCTAGGTTCTCTTAGAAGTACAGCTCAATTAATTAGTTATGAATTAATATTAAGTT  
CAGCTATATTAATAGTAATTATGATAACAGGAAATTTAAATTTAACTGTTTGACTGAATCTCAAA  
GAGCTATTTGATTTATACTACCTTTATTTCTGTGTTTATAATATTTTTCATAGGATCTATAGCTGA  
GACAAATAGAGCTCCTTTGATTTAGCCGAGGCTAACCTGCTAATCTGGTTTGGTCTGGTTATAT  
GTCACAAATTGCTAGGAAACCTTTTTATTTAAAAACAAAAGACAATTAGCAGGAAACTTAATTT  
AACCTAATTAATAAATTATTAGATAAATAAATCTTTCATAGACTAAACGTGACAATTTAATATATATA  
TATATTTATTTATATATATGATTAAATAAGATATAGTCAATCATCGGTGTGAATCGACTTAAAAAA  
AAAAGCACATGGGTAAACCCATCTCCCCTTATTAGGGGAATCAGAACTTGTTAGTGGGTTTCAT  
GACAGAGCATGCTGCCGTAGTTTTCGTATTCTTCTTTTAGCTGAGTACGGTAGTATTGTACTAAT  
GTGTATTTTAACTAGTATATTATTTATTGGTGGTTACTTATTATTTGAAATATCCTATGTTTTACTG  
TGGTAAATTATATTTCTTTGAATTATCTTTATAGACTGAGTAACATTTGTAGAGGTACAATCTTT  
ATACACTGATTTTTTAAATAATTCTATCATTGAAGGATTATTATATGGGTTAATCTAGGATTAAA  
AAGTTCTTTAATGATATTCACATTTATTTGAGCTAGAGCATCCTTCCCTAGAATACGATTTGATCA  
ACTAATGGGCTTCTGTTGAACAGTTTTATTACCTATTAATTTTGCAATTATTATATTAGTACCTTGT  
GTTTTATATAGTTTTAACTTATTACCTGTAAATATACCATTGTTCTAGCTCACACACCCGCCGCC  
CTACTGCCACAAGGCTACAGTACATATGAGGAGGGGAACTAAAGATCTAGAATATCCTAGTTA

ATAATTACACTTAATAGTATACTAAATAGACCATCTATCATACTCGAGAATAGTGATAGTGTAAT  
TATACACTATTTTAACTGTATTCTACACTATTAGCATATTATTATCTTTATATGATAATAATTTTATA  
ACTTAATTTATTAGGTTACATTAACAAAAAATTCGTTAACTTTTTTCACCACTTTTAAATACAAAAT  
ACGAATTTTA

>YN157

ATAACAATTCTAAAGAACATAAAGAGTTATTAGATAAAAAATAATTCACCTATACAGTTAATAAAT  
CAACTTAAAGGGTATTTTTTCATAAATCCTTTATTAGCTTTAAGTTTAGCTATTACTATTTTCTCTTT  
TGCAGGTATTCCTCCTCTGTAGGGTTCTTTGCTAAACAGATGGTATTAAGCGCGGCTATTGATC  
AAGGTTATATCTTTTTATCTTTAGTTGCAATATTAAGTGTATAGGAGGGGTTTATTATTTAAA  
TATAATTAAGAAATGTTCTTTTATTCACCTGACTATAAATTAACGAAGAAATTAATAAATAC  
TATTAATGGTCAAATTATTAATAGAAACAATAAATATTAATGTTGAATTTAATTATACAAATGT  
AGTTATGTCTAGTTCTGTGGCAATAACTATTTCTACTATTACATTAGTAGTTTTATTATTCATGTTT  
ATGAATAAAGAATGATTAAGTCTGGGTACTATATTGGTACAATCTTTATTTAGCTATTAATGAGTA  
GTATGACATTATTTATAGGGTTTGTATCTGTTATAGCTATTTTATTTTAGCCATTAATTTTATATTT  
GCTCCTCATAATCCTTATCAAGAAAAATATAGTATTTTCGAGTGTGGTTTCCATAGTTTTTTAGGG  
CAAAATAGAACACAATTCGGTATAAAATCCTTATTTTGTCTTAGTTTATTTACTTTTAGATTTAG  
AAATATTATTAACTTTCCCTTTCGCTCTTAGTGAGTATGTTAATGGTATTTATGGTCTTTTAGTTAC  
TTTAATTTTATAGCTATAATAACTATAGGATTTATATTTGAATTAGGTAAAAGCGCTCTTAAATA  
GACAGCAGACAAAAATTATATATACCTAAATTGAACGTTAATTACCATACAGAGTATGTTGGAAT  
AGGTAAGGTTTCTAAGTAAAGTTATAGAGGCAGAAAACCAAAAAACCTACCAAAGGGTAGCTA  
ATGGGAAGCTATTAATAAAGATGATAACCTATATATAGTATAGTTACTATATATTTACTATA  
ACTAGGATTATTATATATATATATTATCTTATTGTATATTAAGATTATTATTATTATAAGGTATA  
ATTAATATAGTATCTTATTGTATAAGAATATAATATATTAACCTATAATTAATTTTATTTTAAATTT  
TTAATTATAATTTTTTTTTATATCTAGATGCTTACACATCTACAGATGTAGAAGAGAACAAAATAT  
TGTTGTTATAGTAGTGGATGATATAGAAAAATATTTTTATATTATTTATTTTGTAGGTAGCTTTT  
GAAGTGTTTGATAGAGAGGATATATGGACGGTAGGAGGGTATTCATTTAATGAACAGTGGATA  
GTTTAAATTAACCTAGTTATAGTTTATGAATTTAAATTATAATTATATTAATGTAGGTTATGATAGA  
ATTATGTATTGATCCTTAAGAGTTAAGAGAGATACGCCACGTATAATACATATTGGTTTAGGGT  
TGAGTATATATACTTAAGAGTTAAGAATATATATATACAATATATAATAAATATAGTAATATATTA  
ATGGTATGGACTTAACCAGGTTTATATATTATCATTTGATAAACATTAATTATAATTTTCTATTTA  
TTATTATTATTACTGTGAGATTAATAATTATTAATAATATTACATAGTACGTGATATTTGG  
GGATTTTATCTTATTAATTGGCAATTAATGATTCTAATCAAATTTTATTCTCTTTAGTTTAAATGGTA  
GAACAATGATCTTCTAATTCATTGGTTTTAGTTTCGATTCTAAAAAGAGATGAGTAAATAATTTTCT  
AGATCAGAAATACTACTTTTAACTACAAAAAGCTTACGCTTTTAAACATTTTTTTGATAAATAACA  
ACTATTGTTAATATTTGGCTGTCTATTGGTTTAACTAACAATTACAAAATTTTTCAATTTTTATAAT  
ATAAATTTAAATGAGAATATTAAAAAGTCATTATTAAAAATTAGTGAATTCTTACCTTATCGA  
TGCCTCACAACCAAGTAACATTAGTTACTTGTGAAATTTTGGTTCATTATTAGCTGTTTGTAAAT  
AGTACAAATTATTACCGGTATTACATTAGCTATGCATTATAGTCCTAGTGAATGGAAGCTTTTAA  
CTCAATAGAGCATATAATGAGAGATGTTAATAACGGGTGATTAGTTCGTTATCTACATAGTAATA  
CAGCTTCTGCTTTCTTTTCTTAGTGTTTACACATAGGAAGAGGTATATATTACGGATCATATA  
GAGCTCCTCGTACTTTAGTTTGAGCTATTGGTACTGTTATATTAATTAATGATGGCTATCGGTT  
TCCTAGGTTATGTTTTACCTTATGGACAGATGTCATTATGAGGTGCTACAGTTATTACTAATCTTA  
TTAGTGCTATACCTGAATAGGGCAAGATATTGTTGAATTCATTTGAGGTGGTTTTCTGTAAATA  
ATGCCACTTAAACAGATTTTTTGCATTACATTTGTATTGCCTTTGTATTAGCTGCTTTAGTTTAA

ATGCACTTAATTGCACTTCATGATACTGCTGGTTCAAGCAATCCTCTTGGTGTTTCAGGTAATTAC  
GATAGAATTACATTTGCTCCATATTTTTATTTAAAGATTTAATTACTATTTTTATATTTATTTTTGTA  
TTAAGTGCTTTTGATTCTTTATGCCTAATGTTTTAGGGGATAGTGATAATTATATTATGGCTAATC  
CTATGCAAACCTCCTGCTGCTATTGTACCTGAATGATACTTATTACCTTTCTATGCTATTTTAAGATC  
TATACCTAATAAATTATTAGGTGTTATAGCGATGTTTAGTGCTATTTTAGCTATTATGTTATTACCT  
GTTACAGATTTAGGTAGATCTAGAGGTTTACAATTTAGACCATTTAGTAAAATAGCTTTCTGAGTT  
TTTGTTGCTAATTTCTTAGTTTTAATGCAATTAGGTGCTAAACACGTTGAAGATCCATTTATATTAT  
TAGGTCAATTAAGTACTGTATTATACTTTAGTTATTTTTGTTGCTATATTACCTTTAGCTAGTACTT  
AGATAATAGTTTAACTGATTTATCTAATAAATCTGAATTATTTTTAAATAAACTAACTAAATATAT  
TAAGATTATTATTTAATATATTTTCTATTTAAGATACTATTAATTTAGTATTTTGGGTTTTAGTTTA  
TAATTTATATTATATTATGCATTACCCTCCACCTTGCTTTGTAGTAAGCTAATCTGTTATTTCTTTA  
GTTTAATGGTAGAACAATGATCTTCTAATTCATTGGTTTTAGTTCGAATCTAAAAAGGAAATAAG  
AAATATATTCTTATTACTTATATAATAATTATTTCTTAAAAATATACATTTTGCAATTATAGCCGT  
TTAGCTGTATTAATAATGTAAATGATATAAAATAGAATAAATATTTAAATTATTCCTATGTTATATT  
ATCCTATATTGCAACCATTATCAGAAGTTGTATTAATACTTGTACCTGCCTTATTAGCTGTAGCTT  
ATGTTACAGTTGCTGAAAGAAAACTATGGCTAGTATGCAAAGAAGATTAGGTCCTAATGCTGT  
AGGTTACTATGGACTATTGCAAGCATTTGCTGATGCCTTAAACCTTTTATTAAGAATATGTAG  
CTCCTACACAATCTAATATTGTTCTTTTCTTTTAGGTCCTGTAATAACTTTAATTTTGCATTATTA  
GGTTACGCTGTTATACCCTATGGTCCTGGTTCAGGGATAAGCGACATGAATTTAGGTATATTTTA  
CATGTTAGCTGTGTCATCTTTAGCTACATACGGTATTCTATTAGCTGGTTGAAGTGCGAATAGTA  
AATACGCTTTTCTAGGTTCTCTTAGAAGTACAGCTCAATTAATTAGTTATGAATTAATTAAGTT  
CAGCTATATTAATAGTAATTATGATAACAGGAAATTTAAATTTAACTGTTTGTACTGAATCTCAAA  
GAGCTATTTGATTTATACTACCTTTATTTCTGTGTTTATAATATTTTTCATAGGATCTATAGCTGA  
GACAAATAGAGCTCCTTTTGATTTAGCCGAGGCTAACCTGCTAATCTGGTTTGGTCTGGTTATAT  
GTCACAAATTGCTAGGAAACCTTTTTATTTAAAAACAAAAGACAATTAGCAGGAACTTAATTT  
AACCTAATTAATAATTAGATAAATAAATCTTTCATAGACTAAACGTGACAATTAATATATATA  
TATATTTATTTATATATATGATTAATAAGATATAGTCAATCATCGGTGTGAATCGACTTAAAAAA  
AAAAGCACATGGGTAAACCCATCTCCCCTTATTAGGGGAATCAGAACTTGTTAGTGGGTTTCAT  
GACAGAGCATGCTGCCGTAGTTTTCGTATTCTTCTTTTATAGCTGAGTACGGTAGTATTGTACTAAT  
GTGTATTTTAACTAGTATATTATTTATTGGTGGTTACTTATTATTTGAAATATCCTATGTTTTTACTG  
TGGTAAATTATATTTTCTTTGAATTATTCTTTATAGACTGAGTAACATTTGTAGAGGTACAATCTTT  
ATACACTGATTTTTTAAATAATTCTATCATTGAAGGATTATTATATGGGTTTAACTAGGATTA  
AAGTTCTTTAATGATATTCACATTTATTTGAGCTAGAGCATCCTTCCCTAGAATACGATTTGATCA  
ACTAATGGGCTTCTGTTGAACAGTTTTATTACCTATTAATTTTGAATTATTATATTAGTACCTTGT  
GTTTTATATAGTTTTAACTTATTACCTGTAAATATACCATTGTTCTAGCTCACACACCCGCCGCC  
CTACTGCCACAAGGCTACAGTACATATGAGGAGGGGAATAAGATCTAGAACTATCCTAGTTA  
ATAATTACACTTAATAGTATACTAAATAGACCATCTATCATACTCGAGAATAGTGATAGTGAAT  
TATACACTATTTTAACTGTATTCTACACTATTAGCATATTATTATCTTTATATGATAATAATTTTATA  
ACTTAATTTATTAGGTTACATTAACAAAAAATTCGTTAACTTTTTTACCACCTTTTAAATACAAAAT  
ACGAATTTTA

>YN158

ATAACAATTCTAAAGAACATAAAGAGTTATTAGATAAAAAATAATTCACCTATACAGTTAATAAAT  
CAACTTAAAGGTATTTTTTCATAAATCCTTTATTAGCTTTAAGTTTAGCTATTACTATTTTCTCTTT  
TGCAGGTATTCCTCCTCTTGTAGGGTTCTTTGCTAAACAGATGGTATTAAGCGCGGCTATTGATC

AAGGTTATATCTTTTTATCTTTAGTTGCAATATTAAGTGTATAGGAGGGGTTTATTATTTAAA  
TATAATTAAGAAATGTTCTTTTATTCACCTGACTATAAATTAACGAAGAAATTAATAATAC  
TATTAATGGTCAAATTATTAATAGAAACAATAAAATATTAATGTTGAATTTAATTATACAAATGT  
AGTTATGTCTAGTTCTGTGGCAATAACTATTTCTACTATTACATTAGTAGTTTTATTATTCATGTTT  
ATGAATAAAGAATGATTAAGTCTGGGTACTATATTGGTACAATCTTTATTTAGCTATTAATGAGTA  
GTATGACATTATTTATAGGGTTTGTATCTGTTATAGCTATTTTATTTTAGCCATTAATTTTATATTT  
GCTCCTCATAATCCTTATCAAGAAAAATATAGTATTTTCGAGTGTGGTTTCCATAGTTTTTTAGGG  
CAAAATAGAACACAATTCGGTATAAAATCTTTATTTTGCTTTAGTTTATTTACTTTTAGATTTAG  
AAATATTATTAACCTTCCCTTCGCTCTTAGTGAGTATGTTAATGGTATTTATGGTCTTTTAGTTAC  
TTTAATTTTATAGCTATAATAACTATAGGATTTATATTTGAATTAGGTAAGCGCTCTTAAATA  
GACAGCAGACAAAAATTATATACCTAAATTGAACGTTAATTACCATACAGAGTATGTTGGAAT  
AGGTAAGGTTTCTAAGTAAAGTTATAGAGGCAGAAAACCAAAAAACCTACCAAAGGGTAGCTA  
ATGGGAAGCTATTAATAAAAGATGATAACCTATATATAGTATAGTTACTATATATTTACTATA  
ACTAGGATTATTATATATATATATATTATCTTATTGTATATTAAGATTATTATTATAAGGTATA  
ATTAATATAGTATCTTATTGTATAAGAATATAATATATTAACCTATAATTAATTTTATTTTAAATTT  
TTAATTATAATTTTTTTTATATCTAGATGCTTACACATCTACAGATGTAGAAGAGAACAAAATAT  
TGTTGTTATAGTAGTGGATGATATAGAAAAATATTTTATATTATTTATTTTGTAGGTAGCTTTT  
GAAGTGTGATAGAGAGGATATATGGACGGTAGGAGGTATTCATTTAATGAACAGTGGATA  
GTTTAAATTAACCTAGTTATAGTTTATGAATTTAAATTATAATTATATTAATGTAGGTTATGATAGA  
ATTATGTATTGATCCTTAAGAGTTAAGAGAGATACGCCACGTATAATACATATTGGTTTAGGGT  
TGAGTATATATACTTAAGAGTTAAGAATATATATATACAATATATAATAAATATAGTAATATATTA  
ATGGTATGGACTTAACCAGGTTTATATATTATCATTTGATAAACATTAATTATAATTTTCTATTTA  
TTATTATTATACTGTGAGATTAATAATTATTAATAATATTACATAGTACGTGATATTTGG  
GGATTTTATCTTATTAATTGGCAATTAATGATTCTAATCAAATTTTATTCTCTTTAGTTTAAATGGTA  
GAACAATGATCTTCTAATTCATTGGTTTTAGTTGATTCTAAAAAGAGATGAGTAAATAATTTTCT  
AGATCAGAAATACTACTTTTAACTACAAAAAGCTTACGCTTTTAAACATTTTTTGATAAATAACA  
ACTATTGTTAATATTTGGCTGTCTATTGGTTTAACTAACAATTACAAAATTTTTCAATTTTTATAAT  
ATAAATTTAAATGAGAATATTAATAAGTCATTCAATTATTAATAATAGTGAATCTTACCTTATCGA  
TGCGTCACAACCAAGTAACATTAGTTACTTGTGAAATTTTGGTTCATTATTAGCTGTTTGTTAAT  
AGTACAAATTATTACCGGTATTACATTAGCTATGCATTATAGTCCTAGTGAATGGAAGCTTTTAA  
CTCAATAGAGCATATAATGAGAGATGTTAATAACGGGTGATTAGTTCGTTATCTACATAGTAATA  
CAGCTTCTGCTTCTTTTCTTAGTGTATTTACACATAGGAAGAGGTATATATTACGGATCATATA  
GAGCTCCTCGTACTTTAGTTGAGCTATTGGTACTGTTATATTAATATTAATGATGGCTATCGGTT  
TCCTAGGTTATGTTTTACCTTATGGACAGATGTCATTATGAGGTGCTACAGTTATTACTAATCTTA  
TTAGTGCTATACCTGAATAGGGCAAGATATTGTTGAATTCATTTGAGGTGGTTTTCTGTTAATA  
ATGCCACTTTAAACAGATTTTTGCATTACATTTGTATTGCCTTTGTATTAGCTGCTTAGTTTA  
ATGCACTTAATTGCACTTCATGATACTGCTGGTTCAAGCAATCCTCTTGGTGTTCAGGTAATTAC  
GATAGAATTACATTTGCTCCATATTTTTATTTAAAGATTTAATTACTATTTTATATTTATTTTGT  
TTAAGTGCTTTTGTATTCTTTATGCCTAATGTTTTAGGGGATAGTGATAATTATATTATGGCTAATC  
CTATGCAAACCTCCTGCTGCTATTGTACCTGAATGATACTTATTACCTTTCTATGCTATTTTAAAGATC  
TATACCTAATAAATTATTAGGTGTTATAGCGATGTTTAGTGCTATTTAGCTATTATGTTATTACCT  
GTTACAGATTTAGGTAGATCTAGAGGTTTACAATTTAGACCATTTAGTAAATAGCTTTCTGAGTT  
TTTGTTGCTAATTTCTTAGTTTAAATGCAATTAGGTGCTAAACACGTTGAAGATCCATTTATATTAT  
TAGGTCAATTAAGTACTGTATTATACTTTAGTTATTTTGTGCTATATTACCTTAGCTAGTTACTT

AGATAATAGTTTAACTGATTTATCTAATAAATCTGAATTATTTTTAAATAAACTAACTAAATATAT  
TAAGATTATTATTTAATATATTTTCTATTTAAGATACTATTAATTTAGTATTTTGGGTTTTTCAGTTTA  
TAATTTATATTATATTATGCATTACCTCCACCTTGCTTTGTAGTAAGCTAATCTGTTATTTCCCTTA  
GTTTAATGGTAGAACAATGATCTTCTAATTCATTGGTTTTAGTTCGAATCTAAAAAGGAAATAAG  
AAATATATTCTTATTATTACTTATATAATAATTATTTCTTAAAAATATACATTTTGCATTATAGCCGT  
TTAGCTGTATTAAATGTAAATGATATAAAATAGAATAAATATTTAAATTATTCCTATGTTATATT  
ATCCTATATTGCAACCATTATCAGAAAGTTGTATTAATACTTGTACCTGCCTTATTAGCTGTAGCTT  
ATGTTACAGTTGCTGAAAGAAAACTATGGCTAGTATGCAAAGAAGATTAGGTCCTAATGCTGT  
AGGTTACTATGGACTATTGCAAGCATTGCTGATGCCTTAAACTTTTTATTAAGAATATGTAG  
CTCCTACACAATCTAATATTGTTCTTTTCTTTTAGGTCCTGTAATAACTTTAATTTTTGCATTATTA  
GGTTACGCTGTTATACCCTATGGTCCTGGTTCAGGGATAAGCGACATGAATTTAGGTATATTTTA  
CATGTTAGCTGTGTCATCTTTAGCTACATACGGTATTCTATTAGCTGGTTGAAGTGCGAATAGTA  
AATACGCTTTTCTAGGTTCTCTTAGAAGTACAGCTCAATTAATTAGTTATGAATTAATTAAGTT  
CAGCTATATTAATAGTAATTATGATAACAGGAAATTTAAATTTAACTGTTTGTACTGAATCTCAAA  
GAGCTATTTGATTTATACTACCTTTATTTCTGTGTTTATAATTTTTTCATAGGATCTATAGCTGA  
GACAAATAGAGCTCCTTTTGATTTAGCCGAGGCTAACCTGCTAATCTGGTTTGGTCTGGTTATAT  
GTCACAAATTGCTAGGAAACCTTTTTATTTAAAAACAAAAGACAATTAGCAGGAAACTTAATTT  
AACCTAATTAATAATTAGATAATTAACTCTTCATAGACTAAACGTGACAATTTAATATATATA  
TATATTTATTTATATATATGATTAAATAAGATATAGTCAATCATCGGTGTGAATCGACTTAAAAAA  
AAAAGCACATGGGTAAACCCATCTCCCCTTATTAGGGGAATCAGAACTTGTTAGTGGGTTTCAT  
GACAGAGCATGCTGCCGTAGTTTTCGTATTCTTCTTTTAGCTGAGTACGGTAGTATTGTACTAAT  
GTGTATTTTAACTAGTATATTATTTATTGGTGGTTACTTATTATTTGAAATATCCTATGTTTTTACTG  
TGGTAAATTATATTTTCTTTGAATTATTCTTTATAGACTGAGTAACATTTGTAGAGGTACAATCTTT  
ATACACTGATTTTTTAAATAATTCTATCATTGAAGGATTATTATATGGGTTTAACTAGGATTAAA  
AAGTTCTTTAATGATATTCACATTTATTTGAGCTAGAGCATCCTTCCCTAGAATACGATTTGATCA  
ACTAATGGGCTTCTGTTGAACAGTTTTATTACCTATTAATTTTGCAATTATTATATTAGTACCTTGT  
GTTTTATATAGTTTTAACTTATTACCTGTAAATATACCATTGTTCTAGCTCACACACCCGCCGCC  
CTACTGCCACAAGGCTACAGTACATATGAGGAGGGGAACTAAAGATCTAGAACTATCCTAGTTA  
ATAATTACACTTAATAGTATACTAAATAGACCATCTATCATACTCGAGAATAGTGATAGTGAAT  
TATACACTATTTTAACTGTATTCTACACTATTAGCATATTATTATCTTTATATGATAATAATTTATA  
ACTTAATTTATTAGGTTACATTAACAAAAAATTCGTTAACTTTTTTCACCACTTTTAAATACAAAAT  
ACGAATTTTA

>YN161

ATAACAATTCTAAAGAACATAAAGAGTTATTAGATAAAAAATAATTCACCTATACAGTTAATAAAT  
CAACTTAAAGGGTATTTTTTCATAAATCCTTTATTAGCTTTAAGTTTAGCTATTACTATTTCTCTTT  
TGCAGGTATTCCTCCTCTTGTAGGGTTCTTGCTAAACAGATGGTATTAAGCGCGGCTATTGATC  
AAGGTTATATCTTTTTATCTTTAGTTGCAATATTAAGTGTATAGGAGGGGTTTATTATTTAAA  
TATAATTAAGAAATGTTCTTTTATTCACCTGACTATAAATTAAACGAAGAAATTAATAAATAC  
TATTAATGGTCAAATTATTAATAGAAACAATAAAATATTAAATGTTGAATTTAATTATACAAATGT  
AGTTATGTCTAGTTCTGTGGCAATAACTATTTCTACTATTACATTAGTAGTTTTATTATTCATGTTT  
ATGAATAAAGAATGATTAAGTCTGGGTACTATATTGGTACAATCTTTATTTAGCTATTAATGAGTA  
GTATGACATTATTTATAGGGTTTGTATCTGTTATAGCTATTTTATTTTAGCCATTAATTTATATTT  
GCTCCTCATAATCCTTATCAAGAAAAATATAGTATTTTCGAGTGTGGTTTCCATAGTTTTTAGGG  
CAAAATAGAACACAATTCGGTATAAAATCTTTATTTTGTCTTAGTTTATTTACTTTTAGATTTAG

AAATATTATTAACTTTCCCTTTTCGCTCTTAGTGAGTATGTTAATGGTATTTATGGTCTTTTAGTTAC  
TTTAATTTTTATAGCTATAATAACTATAGGATTTATATTTGAATTAGGTAAAAGCGCTCTTAAAATA  
GACAGCAGACAAAAATTATATATACCTAAATTGAACGTTAATTACCATACAGAGTATGTTGGAAT  
AGGTAAGGTTTCTAAGTAAAGTTATAGAGGCAGAAAACCAAAAAACCTACCAAAGGGTAGCTA  
ATGGGAAGCTATTAATAAATAAAGATGATAACCTATATATAGTATAGTTACTATATATTTACTATA  
ACTAGGATTATTATATATATATATATTATCTTATTGTATATTAAGATTATTATTATAAGGTATA  
ATTAATATAGTATCTTATTGTATAAGAATATAATATATTAACCTATAATTAATTTTATTTTTTAATTT  
TTAATTATAATTTTTTTTTTATATCTAGATGCTTACACATCTACAGATGTAGAAGAGAACAAAATAT  
TGTTGTTATAGTAGTGGATGATATAGAAAAATTTTTTATATTATTTATTTTTGTTAGGTAGCTTTT  
GAAGTGTTTGATAGAGAGGATATATGGACGGTAGGAGGGTATTCATTTTAATGAACAGTGGAATA  
GTTTAAATTAACCTAGTTATAGTTTATGAATTTAAATTATAATTATATTAATGTAGGTTATGATAGA  
ATTATGTATTGATCCTTAAGAGTTAAGAGAGATACGCCACGTATAATACATATTGGTTTAGGGT  
TGAGTATATATACTTAAGAGTTAAGAATATATATATACAATATATAATAAATATAGTAATATATTA  
ATGGTATGGACTTAACCAGGTTTATATATTATCATTTGATAAACATTAATTATAATTTTTCTATTTA  
TTATTATTATTATACTGTGAGATTAATAATTATTAATAATATAATATTACATAGTACGTGATATTTGG  
GGATTTTATCTTATTAATTGGCAATTAATGATTCTAATCAAATTTTATTCTCTTTAGTTTAATGGTA  
GAACAATGATCTTCTAATTCATTGGTTTTAGTTTCGATTCTAAAAAGAGATGAGTAAATAATTTTCT  
AGATCAGAAATACTACTTTTAACTACAAAAGCTTACGCTTTTTAACATTTTTTGTAAATAACA  
ACTATTGTTAATATTTGGCTGTCTATTGGTTTAACTAACAATTACAAAATTTTTTCAATTTTTATAAT  
ATAAATTTAAATGAGAATATTAATAAAGTCATTCATTATTAATAATTAGTGAATTCTTACCTTATCGA  
TGCGTCACAACCAAGTAACATTAGTTACTTGTGAAATTTTGGTTCATTATTAGCTGTTTGTTAAT  
AGTACAAATTATTACCGGTATTACATTAGCTATGCATTATAGTCCTAGTGAATGGAAGCTTTTAA  
CTCAATAGAGCATATAATGAGAGATGTTAATAACGGGTGATTAGTTCGTTATCTACATAGTAATA  
CAGCTTCTGCTTTCTTTTTCTTAGTGATTTACACATAGGAAGAGGTATATATTACGGATCATATA  
GAGCTCCTCGTACTTTAGTTTGAGCTATTGGTACTGTTATATTAATTAATGATGGCTATCGGTT  
TCCTAGGTTATGTTTTACCTTATGGACAGATGTCATTATGAGGTGCTACAGTTATTACTAATCTTA  
TTAGTGCTATACCTGAATAGGGCAAGATATTGTTGAATTCATTTGAGGTGGTTTTTCTGTTAATA  
ATGCCACTTTAAACAGATTTTTTGCAATTACATTTGTATTGCCTTTTGTATTAGCTGCTTTAGTTTA  
ATGCACTTAATTGCACTTCATGATACTGCTGGTTCAAGCAATCCTCTTGGTGTTTCAGGTAATTAC  
GATAGAATTACATTTGCTCCATATTTTTATTTAAAGATTTAATTACTATTTTTATATTTATTTTGTA  
TTAAGTGCTTTTGATTCTTTATGCCTAATGTTTTAGGGGATAGTGATAATTATATTATGGCTAATC  
CTATGCAAACCTCCTGCTGCTATTGTACCTGAATGATACTTATTACCTTTCTATGCTATTTTAAGATC  
TATACCTAATAAATTATTAGGTGTTATAGCGATGTTTAGTGCTATTTAGCTATTATGTTATTACCT  
GTTACAGATTTAGGTAGATCTAGAGGTTTACAATTTAGACCATTTAGTAAATAGCTTTCTGAGTT  
TTTGTTGCTAATTTCTTAGTTTAAATGCAATTAGGTGCTAAACACGTTGAAGATCCATTTATATTAT  
TAGGTCAATTAAGTACTGTATTATACTTTAGTTATTTTGTTGCTATATTACCTTTAGCTAGTTACTT  
AGATAATAGTTTAACTGATTTATCTAATAAATCTGAATTATTTTAAATAAACTAACTAAATATAT  
TAAGATTATTATTTAATATATTTTCTATTTAAGATACTATTAATTTAGTATTTTGGGTTTTAGTTTA  
TAATTTATATTATATTATGCATTACCCTCCACCTTGCTTTGTAGTAAGCTAATCTGTTATTTCTTTA  
GTTTAATGGTAGAACAAATGATCTTCTAATTCATTGGTTTTAGTTTGAATCTAAAAAGGAAATAAG  
AAATATATTCTTATTATTACTTATATAATAATTATTTCTTAAAAATATACATTTTGCATTATAGCCGT  
TTAGCTGTATTAAATGTAAATGATATAAAATAGAATAAATATTTAAATTATTCCTATGTTATATT  
ATCCTATATTGCAACCATTATCAGAAGTTGTATTAATACTTGTACCTGCCTTATTAGCTGTAGCTT  
ATGTTACAGTTGCTGAAAGAAAACTATGGCTAGTATGCAAGAAGATTAGGTCCTAATGCTGT

AGGTTACTATGGACTATTGCAAGCATTGCTGATGCCTTAAACCTTTTATTTAAAGAATATGTAG  
CTCCTACACAATCTAATATTGTTCTTTTCTTTTAGGTCCTGTAATAACTTTAATTTTGCATTATTA  
GGTTACGCTGTTATACCCTATGGTCCTGGTTCAGGGATAAGCGACATGAATTTAGGTATATTTTA  
CATGTTAGCTGTGTCATCTTTAGCTACATACGGTATTCTATTAGCTGGTTGAAGTGCGAATAGTA  
AATACGCTTTTCTAGGTTCTCTTAGAAGTACAGCTCAATTAATTAGTTATGAATTAATATTAAGTT  
CAGCTATATTAATAGTAATTATGATAACAGGAAATTTAAATTTAACTGTTTGTACTGAATCTCAAA  
GAGCTATTTGATTTATACTACCTTTATTTCTGTGTTTATAATATTTTTCATAGGATCTATAGCTGA  
GACAAATAGAGCTCCTTTTGATTTAGCCGAGGCTAACCTGCTAATCTGGTTTGGTCTGGTTATAT  
GTCACAAATTGCTAGGAAACCTTTTTATTTTAAAAACAAAAGACAATTAGCAGGAAACTTAATTT  
AACCTAATTAATAATATTAGATAATTAACTCTTCATAGACTAAACGTGACAATTTAATATATATA  
TATATTTATTTATATATATGATTAAATAAGATATAGTCAATCATCGGTGTGAATCGACTTAAAAAA  
AAAAGCACATGGGTAAACCCATCTCCCCTTATTAGGGGAATCAGAAGTTGTTAGTGGGTTTCAT  
GACAGAGCATGCTGCCGTAGTTTTCGTATTCTTCTTTTAGCTGAGTACGGTAGTATTGTACTAAT  
GTGTATTTTAACTAGTATATTATTTATTGGTGGTTACTTATTATTTGAAATATCCTATGTTTTACTG  
TGGTAAATTATATTTTCTTTGAATTATTCTTTATAGACTGAGTAACATTTGTAGAGGTACAATCTTT  
ATACACTGATTTTTTAAATAATTCTATCATTGAAGGATTATTATATGGGTTTAACTAGGATTAAA  
AAGTTCTTTAATGATATTCACATTTATTTGAGCTAGAGCATCCTTCCCTAGAATACGATTTGATCA  
ACTAATGGGCTTCTGTTGAACAGTTTTATTACCTATTAATTTTGCAATTATTATATTAGTACCTTGT  
GTTTTATATAGTTTTAACTTATTACCTGTAAATATACCATTGTTCTAGCTCACACACCCGCCGCC  
CTACTGCCACAAGGCTACAGTACATATGAGGAGGGGAACTAAAGATCTAGAAGTATCCTAGTTA  
ATAATTACACTTAATAGTATACTAAATAGACCATCTATCATACTCGAGAATAGTGATAGTGTAAT  
TATACACTATTTTAACTGTATTCTACACTATTAGGATATTATTATCTTTATATGATAATAATTTTATA  
ACTTAATTTATTAGGTTACATTAACAAAAAATTCGTTAACTTTTTTCACCACTTTTAAATACAAAAT  
ACGAATTTTA

>YN166

ATAACAATTCTAAAGAACATAAAGAGTTATTAGATAAAAAATAATTCACCTATACAGTTAATAAAT  
CAACTTAAAGGGTATTTTTTCATAAATCCTTTATTAGCTTTAAGTTTAGCTATTACTATTTTCTCTTT  
TGCAGGTATTCCTCCTCTGTAGGGTTCTTTGCTAAACAGATGGTATTAAGCGCGGCTATTGATC  
AAGGTTATATCTTTTTATCTTTAGTTGCAATATTAAGTGTATAGGAGGGGTTTATTATTTAAA  
TATAATTAAGAAATGTTCTTTTATTCACCTGACTATAAATTAACGAAGAAATTAATAAATAC  
TATTAATGGTCAAATTATTAATAGAAACAATAAAATATTAATGTTGAATTTAATTATACAAATGT  
AGTTATGTCTAGTTCTGTGGCAATAACTATTTCTACTATTACATTAGTAGTTTTATTATTCATGTTT  
ATGAATAAAGAATGATTAAGTCTGGGTACTATATTGGTACAATCTTTATTTAGCTATTAATGAGTA  
GTATGACATTATTTATAGGGTTTGTATCTGTTATAGCTATTTTATTTTAGCCATTAATTTTATATTT  
GCTCCTCATAATCCTTATCAAGAAAAATATAGTATTTTCGAGTGTGGTTTCCATAGTTTTTTAGGG  
CAAAATAGAACACAATTCGGTATAAAATCTTTATTTTGCTTTAGTTTATTTACTTTTAGATTTAG  
AAATATTATTAACTTTCCCTTTCGCTCTTAGTGAGTATGTTAATGGTATTTATGGTCTTTTAGTTAC  
TTTAATTTTTATAGCTATAATAACTATAGGATTTATATTTGAATTAGGTAAAAGCGCTCTTAAATA  
GACAGCAGACAAAAATTATATATACCTAAATTGAACGTTAATTACCATACAGAGTATGTTGGAAT  
AGGTAAGGTTTCTAAGTAAAGTTATAGAGGCAGAAAACCAAAAAACCTACCAAAGGGTAGCTA  
ATGGGAAGCTATTAAAAATAAAGATGATAACCTATATATAGTATAGTTACTATATATTTACTATA  
ACTAGGATTATTATATATATATATATTATCTTATTGTATATTAAGATTATTATTATTATAAGGTATA  
ATTAATATAGTATCTTATTGTATAAGAATATAATATATTAACCTATAATTAATTTTATTTTAAATTT  
TTAATTATAATTTTTTTTTTATATCTAGATGCTTACACATCTACAGATGTAGAAGAGAACAAAATAT

TGTTGTTATAGTAGTGGATGATATAGAAAAATATTTTTATATTATTTATTTTTGTTAGGTAGCTTTT  
GAAGTGTGTTGATAGAGAGGATATATGGACGGTAGGAGGGTATTCATTTTAATGAACAGTGGATA  
GTTTAAATTAACCTAGTTATAGTTTATGAATTTAAATTATAATTATATTAATGTAGGTTATGATAGA  
ATTATGTATTGATCCTTAAGAGTTAAGAGAGATACGCCCACGTATAATACATATTGGTTTAGGGT  
TGAGTATATATACTTAAGAGTTAAGAATATATATATACAATATATAATAAATATAGTAATATATTA  
ATGGTATGGACTTAACCAGGTTTATATATTATCATTGATAAACATTAATTATAATTTTTCTATTTA  
TTATTATTATTATACTGTGAGATTAATAATTATTTAAATATAATATTACATAGTACGTGATATTTGG  
GGATTTTATCTTATTAATTGGCAATTAATGATTCTAATCAAATTTTATTCTCTTTAGTTTAATGGTA  
GAACAATGATCTTCTAATTCATTGGTTTTAGTTTCGATTCTAAAAAGAGATGAGTAAATAATTTTCT  
AGATCAGAAATACTACTTTTAACTACAAAAAGCTTACGCTTTTAAACATTTTTTTGATAAATAACA  
ACTATTGTTAATATTTGGCTGTCTATTGGTTTAACTACAATTACAAAATTTTTTCAATTTTTATAAT  
ATAAATTTAAATGAGAATATTTAAAAAGTCATTATTATTTAAATTAGTGAATTCTTACCTTATCGA  
TGCGTCACAACCAAGTAACATTAGTTACTTGTGAAATTTTGGTTCATTATTAGCTGTTTGTTAAT  
AGTACAAATTATTACCGGTATTACATTAGCTATGCATTATAGTCCTAGTGAATGGAAGCTTTTAA  
CTCAATAGAGCATATAATGAGAGATGTTAATAACGGGTGATTAGTTCGTTATCTACATAGTAATA  
CAGCTTCTGCTTTCTTTTCTTAGTGATTACACATAGGAAGAGGTATATATTACGGATCATATA  
GAGCTCCTCGTACTTTAGTTTGAGCTATTGGTACTGTTATATTAATTAATGATGGCTATCGGTT  
TCCTAGGTTATGTTTTACCTTATGGACAGATGTCATTATGAGGTGCTACAGTTATTACTAATCTTA  
TTAGTGCTATACCTGAATAGGGCAAGATATTGTTGAATTCATTGAGGTGGTTTTCTGTTAATA  
ATGCCACTTTAAACAGATTTTTGCATTACATTTGTATTGCCTTTGTATTAGCTGCTTAGTTTTA  
ATGCACTTAATTGCACTTCATGATACTGCTGGTTCAAGCAATCCTCTGGTGTTTCAGGTAATTAC  
GATAGAATTACATTTGCTCCATATTTTTATTTAAAGATTTAATTACTATTTTTATATTTATTTTGT  
TTAAGTGCTTTGTATTCTTTATGCCTAATGTTTTAGGGGATAGTGATAATTATATTATGGCTAATC  
CTATGCAAACCTCCTGCTGCTATTGTACCTGAATGATACTTATTACCTTTCTATGCTATTTTAAGATC  
TATACCTAATAAATTATTAGGTGTTATAGCGATGTTTAGTGCTATTTAGCTATTATGTTATTACCT  
GTTACAGATTTAGGTAGATCTAGAGGTTTACAATTTAGACCATTTAGTAAAATAGCTTTCTGAGTT  
TTTGTTGCTAATTTCTTAGTTTTAATGCAATTAGGTGCTAAACACGTTGAAGATCCATTTATATTAT  
TAGGTCAATTAAGTACTGTATTATACTTTAGTTATTTTGTGCTATATTACCTTTAGCTAGTTACTT  
AGATAATAGTTTAACTGATTTATCTAATAAATCTGAATTATTTTAAATAAACTAACTAAATATAT  
TAAGATTATTATTTAATATATTTTCTATTTAAGATACTATTAATTTAGTATTTTGGGTTTTAGTTTA  
TAATTTATATTATATTATGCATTACCCTCCACCTTGCTTTGTAGTAAGCTAATCTGTTATTTCTTTA  
GTTTAATGGTAGAACAATGATCTTCTAATTCATTGGTTTTAGTTTGAATCTAAAAAGGAAATAAG  
AAATATATTCTTATTATTACTTATATAATAATTATTTCTTAAAAATATACATTTTGATTATAGCCGT  
TTAGCTGTATTAAATGTAAATGATATAAAATAGAATAAATATTTAAATTATTCCTATGTTATATT  
ATCCTATATTGCAACCATTATCAGAAGTTGTATTAATACTTGTACCTGCCTTATTAGCTGTAGCTT  
ATGTTACAGTTGCTGAAAGAAAACTATGGCTAGTATGCAAAGAAGATTAGGTCCTAATGCTGT  
AGGTTACTATGGACTATTGCAAGCATTTGCTGATGCCTTAAACCTTTTATTAAGAATATGTAG  
CTCCTACACAATCTAATATTGTTCTTTTCTTTTAGGTCCTGTAATAACTTTAATTTTTGCATTATTA  
GGTTACGCTGTTATACCCTATGGTCCTGGTTCAGGATAAGCGACATGAATTTAGGTATATTTTA  
CATGTTAGCTGTGTCATCTTAGCTACATACGGTATTCTATTAGCTGGTTGAAGTGCGAATAGTA  
AATACGCTTTTCTAGGTTCTCTTAGAAGTACAGCTCAATTAATTAGTTATGAATTAATTAAGTT  
CAGCTATATTAATAGTAATTATGATAACAGGAAATTTAAATTTAACTGTTTGTACTGAATCTCAAA  
GAGCTATTTGATTTATACTACCTTTATTTCTGTGTTTATAATATTTTTCATAGGATCTATAGCTGA  
GACAAATAGAGCTCCTTTTGATTTAGCCGAGGCTAACCTGCTAATCTGGTTTGGTCTGGTTATAT

GTCACAAATTGCTAGGAAACCTTTTTATTTTAAAAACAAAAGACAATTAGCAGGAACTTAATTT  
AACCTAATTAATAATATTAGATAATTAACCTCTTCATAGACTAAACGTGACAATTTAATATATATA  
TATATTTATTTATATATATGATTAAATAAGATATAGTCAATCATCGGTGTGAATCGACTTAAAAAA  
AAAAGCACATGGGTAAACCCATCTCCCCTTATTAGGGGAATCAGAACTTGTTAGTGGGTTTCAT  
GACAGAGCATGCTGCCGTAGTTTTCGTATTCTTCTTTTAGCTGAGTACGGTAGTATTGTACTAAT  
GTGTATTTTAACTAGTATATTATTTATTGGTGGTTACTTATTATTTGAAATATCCTATGTTTTACTG  
TGGTAAATTATATTTTCTTTGAATTATTCTTTATAGACTGAGTAACATTTGTAGAGGTACAATCTTT  
ATACACTGATTTTTTAAATAATTCTATCATTGAAGGATTATTATATGGGTTTAATCTAGGATTAAA  
AAGTTCTTTAATGATATTCACATTTATTTGAGCTAGAGCATCCTTCCCTAGAATACGATTTGATCA  
ACTAATGGGCTTCTGTTGAACAGTTTTATTACCTATTAATTTTGCAATTATTATATTAGTACCTTGT  
GTTTTATATAGTTTTAACTTATTACCTGTAAATATACCATTGTTCTAGCTCACACACCCGCCGCC  
CTACTGCCACAAGGCTACAGTACATATGAGGAGGGGAACCTAAAGATCTAGAACTATCCTAGTTA  
ATAATTACACTTAATAGTATACTAAATAGACCATCTATCATACTCGAGAATAGTGATAGTGTAAT  
TATACACTATTTTAACTGTATTCTACACTATTAGCATATTATTATCTTTATATGATAATAATTTTATA  
ACTTAATTTATTAGGTTACATTAACAAAAAATTCGTTAACTTTTTTCACCACTTTTTAATACAAAAT  
ACGAATTTTA

>YN179

ATAACAATTCTAAAGAACATAAAGAGTTATTAGATAAAAAATAATTCACCTATACAGTTAATAAAT  
CAACTTAAAGGGTATTTTTTCATAAATCCTTTATTAGCTTTAAGTTAGCTATTACTATTTTCTCTTT  
TGCAGGTATTCCTCCTCTTGTAGGGTCTTTGCTAAACAGATGGTATTAAGCGCGGCTATTGATC  
AAGGTTATATCTTTTATCTTTAGTTGCAATATTAAGTGTATAGGAGGGGTTTATTATTTAAA  
TATAATTAAGAAATGTTCTTTTATTCACCTGACTATAAATTAACGAAGAAATTAATAAATAC  
TATTAATGGTCAAATTATTAATAGAAACAATAAAATATTAATGTTGAATTTAATTATACAAATGT  
AGTTATGTCTAGTTCTGTGGCAATAACTATTTCTACTATTACATTAGTAGTTTTATTATTCATGTTT  
ATGAATAAAGAATGATTAAGTCTGGGTACTATATTGGTACAATCTTTATTTAGCTATTAATGAGTA  
GTATGACATTATTTATAGGGTTTGTATCTGTTATAGCTATTTTATTTTAGCCATTAATTTTATATTT  
GCTCCTCATAATCCTTATCAAGAAAAATATAGTATTTTCGAGTGTGGTTTCCATAGTTTTTTAGGG  
CAAAATAGAACACAATTCGGTATAAAATCTTTATTTTGCTTTAGTTTATTTACTTTTAGATTTAG  
AAATATTATTAACCTTTCCCTTTGCTCTTAGTGAGTATGTTAATGGTATTTATGGTCTTTTAGTTAC  
TTTAATTTTTATAGCTATAATAACTATAGGATTTATATTTGAATTAGGTAAAAGCGCTCTTAAATA  
GACAGCAGACAAAAATTATATACCTAAATTGAACGTTAATTACCATACAGAGTATGTTGGAAT  
AGGTAAGGTTTCTAAGTAAAGTTATAGAGGCAGAAAACCAAAAAACCTACCAAAGGGTAGCTA  
ATGGGAAGCTATTAATAAAGATGATAACCTATATATAGTATAGTTACTATATATTTACTATA  
ACTAGGATTATTATATATATATATATTATCTTATTGTATATTAAGATTATTATTATAAGGTATA  
ATTAATATAGTATCTTATTGTATAAGAATATAATATATTAACCTATAATTAATTTATTTTTAATTT  
TTAATTATAATTTTTTTTTATATCTAGATGCTTACACATCTACAGATGTAGAAGAGAACAAAATAT  
TGTTGTTATAGTAGTGATATAGAAAAATATTTTATATTATTTATTTTGTAGGTAGCTTTT  
GAAGTGTGATAGAGAGGATATATGGACGGTAGGAGGTATTCATTTAATGAACAGTGGATA  
GTTTAAATTAACCTAGTTATAGTTTATGAATTTAAATTATAATTATATTAATGTAGGTATGATAGA  
ATTATGTATTGATCCTTAAGAGTTAAGAGAGATACGCCACGTATAATACATATTGGTTAGGGT  
TGAGTATATATACTTAAGAGTTAAGAATATATATATACAATATATAATAAATATAGTAATATATTA  
ATGGTATGGACTTAACCAGGTTTATATATTATCATTTGATAAACATTAATTATAATTTTTCTATTTA  
TTATTATTATACTGTGAGATTAATAATTATTAATAATATTACATAGTACGTGATATTTGG  
GGATTTTATCTTATTAATTGGCAATTAATGATTCTAATCAAATTTTATTCTCTTAGTTTAATGGTA

GAACAATGATCTTCTAATTCATTGGTTTTAGTTTCGATTCTAAAAAGAGATGAGTAAATAATTTTCT  
AGATCAGAAATACTACTTTTAACTACAAAAAGCTTACGCTTTTAAACATTTTTTGATAAATAACA  
ACTATTGTTAATATTTGGCTGTCTATTGGTTTAACTAACAATTACAAAATTTTTCAATTTTTATAAT  
ATAAATTTAAATGAGAATATTA AAAAGTCATTATTATTA AAAATTAGTGAATTCTTACCTTATCGA  
TGCGTCACAACCAAGTAACATTAGTTACTTGTGAAATTTTGGTTCATTATTAGCTGTTTGTTAAT  
AGTACAAATTATTACCGGTATTACATTAGCTATGCATTATAGTCCTAGTGAATGGAAGCTTTTAA  
CTCAATAGAGCATATAATGAGAGATGTTAATAACGGGTGATTAGTTCGTTATCTACATAGTAATA  
CAGCTTCTGCTTTCTTTTTCTTAGTGATTTACACATAGGAAGAGGTATATATTACGGATCATATA  
GAGCTCCTCGTACTTTAGTTTGAGCTATTGGTACTGTTATATTAATTAATGATGGCTATCGGT  
TCCTAGGTTATGTTTTACCTTATGGACAGATGTCATTATGAGGTGCTACAGTTATTACTAATCTTA  
TTAGTGCTATACCTGAATAGGGCAAGATATTGTTGAATTCATTTGAGGTGGTTTTCTGTTAATA  
ATGCCACTTTAAACAGATTTTTGCATTACATTTGTATTGCCTTTGTATTAGCTGCTTTAGTTTAA  
ATGCACTTAATTGCACTTCATGATACTGCTGGTTCAAGCAATCCTCTTGGTGTTTCAGGTAATTAC  
GATAGAATTACATTTGCTCCATATTTTTATTTAAAGATTTAATTACTATTTTTATTTATTTTTGTA  
TTAAGTGCTTTTGTATTCTTTATGCCTAATGTTTTAGGGGATAGTGATAATTATATTATGGCTAATC  
CTATGCAAACCTCTGCTGCTATTGTACCTGAATGATACTTATTACCTTTCTATGCTATTTTAAGATC  
TATACCTAATAAATTATTAGGTGTTATAGCGATGTTTAGTGCTATTTTAGCTATTATGTTATTACCT  
GTTACAGATTTAGGTAGATCTAGAGGTTTACAATTTAGACCATTTAGTAAAATAGCTTTCTGAGTT  
TTTGTTGCTAATTTCTTAGTTTTAATGCAATTAGGTGCTAAACACGTTGAAGATCCATTTATATTAT  
TAGGTCAATTAAGTACTGTATTATACTTTAGTTATTTTTGTTGCTATATTACCTTTAGCTAGTTACTT  
AGATAATAGTTTAACTGATTTATCTAATAAATCTGAATTATTTTAAATAAACTAACTAAATATAT  
TAAGATTATTATTTAATATATTTTCTATTTAAGATACTATTAATTTAGTATTTTGGGTTTTCAGTTTA  
TAATTTATATTATATTATGCATTACCTCCACCTTGCTTTGTAGTAAGCTAATCTGTTATTTCTTTA  
GTTTAATGGTAGAACAATGATCTTCTAATTCATTGGTTTTAGTTTGAATCTAAAAAGGAAATAAG  
AAATATATTCTTATTATTACTTATATAATAATTATTTCTTAAAAATATACATTTTGCATTATAGCCGT  
TTAGCTGTATTA AAAATGTAAAATGATATA AAAATAGAATAAATATTTAAATTATTCCTATGTTATATT  
ATCCTATATTGCAACCATTATCAGAAGTTGTATTAATACTTGTACCTGCCTTATTAGCTGTAGCTT  
ATGTTACAGTTGCTGAAAGAAAACTATGGCTAGTATGCAAAGAAGATTAGGTCCTAATGCTGT  
AGGTTACTATGGACTATTGCAAGCATTTGCTGATGCCTTAAACTTTTATTAAGAATATGTAG  
CTCCTACACAATCTAATATTGTTCTTTCTTTTAGGTCCTGTAATAACTTTAATTTTTGCATTATTA  
GGTTACGCTGTTATACCCTATGGTCCTGGTTCAGGGATAAGCGACATGAATTTAGGTATATTTTA  
CATGTTAGCTGTGTCATCTTTAGCTACATACGGTATTCTATTAGCTGGTTGAAGTGCGAATAGTA  
AATACGCTTTTCTAGGTTCTCTTAGAAGTACAGCTCAATTAATTAGTTATGAATTAATTAAGTT  
CAGCTATATTAATAGTAATTATGATAACAGGAAATTTAAATTTAACTGTTTGTACTGAATCTCAAA  
GAGCTATTTGATTTATACTACCTTTATTTCTGTGTTATAATATTTTTCATAGGATCTATAGCTGA  
GACAAATAGAGCTCCTTTTGATTTAGCCGAGGCTAACCTGCTAATCTGGTTTGGTCTGGTTATAT  
GTCACAAATTGCTAGGAAACCTTTTTATTTTAAAAACAAAAGACAATTAGCAGGAAACTTAATTT  
AACCTAATTA AAAATATTAGATAATTAACTCTTCATAGACTAAACGTGACAATTTAATATATATA  
TATATTTATTTATATATATGATTAAATAAGATATAGTCAATCATCGGTGTGAATCGACTTAAAAAA  
AAAAGCACATGGGTAAACCCATCTCCCTTATTAGGGGAATCAGAACTTGTTAGTGGGTTTCAT  
GACAGAGCATGCTGCCGTAGTTTTCGTATTCTTCTTTTAGCTGAGTACGGTAGTATTGTACTAAT  
GTGTATTTTAACTAGTATATTATTTATTGGTGGTTACTTATTATTTGAAATATCCTATGTTTTTACTG  
TGGTAAATTATATTTTCTTTGAATTATTCTTTATAGACTGAGTAACATTTGTAGAGGTACAATCTTT  
ATACACTGATTTTTTAAATAATTCTATCATTGAAGGATTATTATATGGGTTAATCTAGGATTA

AAGTTCTTTAATGATATTCACATTTATTTGAGCTAGAGCATCCTTCCCTAGAATACGATTTGATCA  
ACTAATGGGCTTCTGTTGAACAGTTTTATTACCTATTAATTTTGCAATTATTATATTAGTACCTTGT  
GTTTTATATAGTTTTAACTTATTACCTGTAAATATACCATTGTTCTAGCTCACACACCCGCCGCC  
CTACTGCCACAAGGCTACAGTACATATGAGGAGGGGAAGTAAAGATCTAGAACTATCCTAGTTA  
ATAATTACACTTAATAGTATACTAAATAGACCATCTATCATACTCGAGAATAGTGATAGTGTAAT  
TATACACTATTTTAACTGTATTCTACACTATTAGGATATTATTATCTTTATATGATAATAATTTTATA  
ACTTAATTTATTAGGTTACATTAACAAAAAATTCGTTAACTTTTTTCACCACTTTTAAATACAAAAT  
ACGAATTTTA

>YN199

ATAACAATTCTAAAGAACATAAAGAGTTATTAGATAAAAAATAATTCACCTATACAGTTAATAAAT  
CAACTTAAAGGGTATTTTTTCATAAATCCTTTATTAGCTTTAAGTTTAGCTATTACTATTTCTCTTT  
TGCAGGTATTCTCCTCTTGTAGGGTCTTTGCTAAACAGATGGTATTAAGCGCGGCTATTGATC  
AAGGTTATATCTTTTTATCTTTAGTTGCAATATTAAGTGTATAGGAGGGGTTTATTATTTAAA  
TATAATTAAGAAATGTTCTTTTATTCACCTGACTATAAATTAACGAAGAAATTAATAAATAC  
TATTAATGGTCAAATTATTAATAGAAACAATAAATATTAATGTTGAATTTAATTATACAAATGT  
AGTTATGTCTAGTTCTGTGGCAATAACTATTTCTACTATTACATTAGTAGTTTTATTATTCATGTTT  
ATGAATAAAGAATGATTAAGTCTGGGTACTATATTGGTACAATCTTTATTTAGCTATTAATGAGTA  
GTATGACATTATTTATAGGGTTGTATCTGTTATAGCTATTTTATTTTAGCCATTAATTTATATTT  
GCTCCTCATAATCCTTATCAAGAAAAATATAGTATTTTCGAGTGTGGTTTCCATAGTTTTTTAGGG  
CAAAATAGAACACAATTCGGTATAAAATTCCTTTATTTTGTCTTAGTTTATTTACTTTTAGATTTAG  
AAATATTATTAACTTTCCCTTCGCTCTTAGTGAGTATGTTAATGGTATTTATGGTCTTTTAGTTAC  
TTTAATTTTTATAGCTATAATAACTATAGGATTTATATTTGAATTAGGTAAGCGCTCTTAAATA  
GACAGCAGACAAAAATTATATATACCTAAATTGAACGTTAATTACCATACAGAGTATGTTGGAAT  
AGGTAAGGTTTCTAAGTAAAGTTATAGAGGCAGAAAACCAAAAAACCTACCAAAGGGTAGCTA  
ATGGGAAGCTATTAATAAATAAAGATGATAACCTATATATAGTATAGTTACTATATATTTACTATA  
ACTAGGATTATTATATATATATATATTATCTTATTGTATATTAAGATTATTATTATAAGGTATA  
ATTAATATAGTATCTTATTGTATAAGAATATAATATATTAACCTATAATTAATTTTATTTTTAATTT  
TTAATTATAATTTTTTTTTATATCTAGATGCTTACACATCTACAGATGTAGAAGAGAACAAAATAT  
TGTTGTTATAGTAGTGGATGATATAGAAAAATATTTTTATATTATTTATTTTGTAGGTAGCTTTT  
GAAGTGTTTGATAGAGAGGATATATGGACGGTAGGAGGGTATTCATTTAATGAACAGTGGAATA  
GTTTAAATTAACCTAGTTATAGTTTATGAATTTAAATTATAATTATATTAATGTAGGTTATGATAGA  
ATTATGTATTGATCCTTAAGAGTTAAGAGAGATACGCCACGTATAATACATATTGGTTTAGGGT  
TGAGTATATATACTTAAGAGTTAAGAATATATATATACAATATATAATAAATATAGTAATATATTA  
ATGGTATGGACTTAACCAGGTTTATATATTATCATTGATAAACATTAATTATAATTTTTCTATTTA  
TTATTATTATTATACTGTGAGATTAATAATTATTAATAATATAATATTACATAGTACGTGATATTTGG  
GGATTTTATCTTATTAATTGGCAATTAATGATTCTAATCAAATTTTATTCTCTTAGTTAATGGTA  
GAACAATGATCTTCTAATTCATTGGTTTTAGTTTCGATTCTAAAAAGAGATGAGTAAATAATTTTCT  
AGATCAGAAATACTACTTTTAACTACAAAAAGCTTACGCTTTTAAACATTTTTTGTAAATAACA  
ACTATTGTTAATATTTGGCTGTCTATTGGTTTAACTAACAATTACAAAATTTTTCAATTTTTATAAT  
ATAAATTTAAATGAGAATATTAATAAAGTCATTATTATTAATAAATTAGTGAATCTTACCTTATCGA  
TGCGTCACAACCAAGTAACATTAGTTACTTGTGAAATTTTGGTTCATTATTAGCTGTTTGTAAAT  
AGTACAAATTATTACCGGTATTACATTAGCTATGCATTATAGTCCTAGTGTAATGGAAGCTTTTAA  
CTCAATAGAGCATATAATGAGAGATGTTAATAACGGGTGATTAGTTCGTTATCTACATAGTAATA  
CAGCTTCTGCTTTCTTTTCTTAGTGTATTTACACATAGGAAGAGGTATATATTACGGATCATATA

GAGCTCCTCGTACTTTAGTTTGAGCTATTGGTACTGTTATATTAATATTAATGATGGCTATCGGTT  
TCCTAGGTTATGTTTTACCTTATGGACAGATGTCATTATGAGGTGCTACAGTTATTACTAATCTTA  
TTAGTGCTATACCTGAATAGGGCAAGATATTGTTGAATTCATTTGAGGTGGTTTTCTGTAAATA  
ATGCCACTTTAAACAGATTTTTGCATTACATTTGTATTGCCTTTGTATTAGCTGCTTTAGTTTTA  
ATGCACTTAATTGCACTTCATGATACTGCTGGTTCAAGCAATCCTCTTGGTGTTCAGGTAATTAC  
GATAGAATTACATTTGCTCCATATTTTTATTTAAAGATTTAATTACTATTTTTATATTTATTTTGTA  
TTAAGTGCTTTTGTATTCTTTATGCCTAATGTTTTAGGGGATAGTGATAATTATATTATGGCTAATC  
CTATGCCAACTCCTGCTGCTATTGTACCTGAATGATACTTATTACCTTTCTATGCTATTTAAGATC  
TATACCTAATAAATTATTAGGTGTTATAGCGATGTTTAGTGCTATTTTAGCTATTATGTTATTACCT  
GTTACAGATTTAGGTAGATCTAGAGGTTTACAATTTAGACCATTTAGTAAAATAGCTTTCTGAGTT  
TTTGTTGCTAATTTCTTAGTTTTAATGCAATTAGGTGCTAAACACGTTGAAGATCCATTTATATTAT  
TAGGTCAATTAAGTACTGTATTATACTTTAGTTATTTTGTTGCTATATTACCTTTAGCTAGTTACTT  
AGATAATAGTTTAACTGATTTATCTAATAAATCTGAATTATTTTAAATAAAACTAACTAAATATAT  
TAAGATTATTATTTAATATATTTTCTATTTAAGATACTATTAATTTAGTATTTTGGGTTTTCAGTTTA  
TAATTTATATTATATTATGCATTACCCTCCACCTTGCTTTGTAGTAAGCTAATCTGTTATTTCTTTA  
GTTAATGGTAGAACAATGATCTTCTAATTCATTGGTTTTAGTTCGAATCTAAAAAGGAAATAAG  
AAATATATTCTTATTATTACTTATATAATAATTATTTCTTAAAAATATACATTTTGCAATTATAGCCGT  
TTAGCTGTATTAATAATGTAAATGATATAAAATAGAATAAATATTTAAATTATTCCTATGTTATATT  
ATCCTATATTGCAACCATTATCAGAAGTTGTATTAATACTTGTACCTGCCTTATTAGCTGTAGCTT  
ATGTTACAGTTGCTGAAAGAAAAACTATGGCTAGTATGCAAAGAAGATTAGGTCCTAATGCTGT  
AGGTTACTATGGACTATTGCAAGCATTTGCTGATGCCTTAAACTTTTTATTAAGAATATGTAG  
CTCCTACACAATCTAATATTGTTCTTTTCTTTTAGGTCCTGTAATAACTTTAATTTTGCAATTATA  
GGTTACGCTGTTATACCCTATGGTCCTGGTTCAGGGATAAGCGACATGAATTTAGGTATATTTA  
CATGTTAGCTGTGTCATCTTTAGCTACATACGGTATTCTATTAGCTGGTTGAAGTGCGAATAGTA  
AATACGCTTTTCTAGGTTCTCTTAGAAGTACAGCTCAATTAATTAGTTATGAATTAATATTAAGTT  
CAGCTATATTAATAGTAATTATGATAACAGGAAATTTAAATTTAACTGTTTGTACTGAATCTCAAA  
GAGCTATTTGATTTATACTACCTTTATTTCTGTGTTTATAATTTTTTCATAGGATCTATAGCTGA  
GACAAATAGAGCTCCTTTTGATTTAGCCGAGGCTAACCTGCTAATCTGGTTTGGTCTGGTTATAT  
GTCACAAATTGCTAGGAAACCTTTTTATTTAAAAACAAAAGACAATTAGCAGGAACTTAATTT  
AACCTAATTAATAATTAGATAATTAACCTCTTCATAGACTAAACGTGACAATTTAATATATATA  
TATATTTATTTATATATATGATTAATAAGATATAGTCAATCATCGGTGTGAATCGACTTAAAAAA  
AAAAGCACATGGGTAAACCCATCTCCCCTTATTAGGGGAATCAGAACTTGTTAGTGGGTTTCAT  
GACAGAGCATGCTGCCGTAGTTTTCGTATTCTTCTTTTAGCTGAGTACGGTAGTATTGTACTAAT  
GTGTATTTTAACTAGTATATTATTTATTGGTGGTTACTTATTATTTGAAATATCCTATGTTTTACTG  
TGGTAAATTATTTTTCTTTGAATTATTCTTTATAGACTGAGTAACATTTGTAGAGGTACAATCTTT  
ATACACTGATTTTTTAAATAATTCTATCATTGAAGGATTATTATATGGGTTTAACTAGGATTA  
AAGTTCTTTAATGATATTCACATTTATTTGAGCTAGAGCATCCTTCCCTAGAATACGATTTGATCA  
ACTAATGGGCTTCTGTTGAACAGTTTTATTACCTATTAATTTTGCAATTATTATATTAGTACCTTGT  
GTTTTATATAGTTTTAACTTATTACCTGTAAATATACCATTGTTCTAGCTCACACACCCGCCGCC  
CTACTGCCACAAGGCTACAGTACATATGAGGAGGGGAACTAAAGATCTAGAACTATCCTAGTTA  
ATAATTACACTTAATAGTATACTAAATAGACCATCTATCATACTCGAGAATAGTGATAGTGTAAT  
TATACACTATTTTAACTGTATTCTACACTATTAGCATATTATTATCTTTATATGATAATAATTTATA  
ACTTAATTTATTAGGTTACATTAACAAAAAATTCGTTAACTTTTTTCACCACTTTTAAATACAAAAT  
ACGAATTTTA

>YN208

ATAACAATTCTAAAGAACATAAAGAGTTATTAGATAAAAAATAATTCACCTATACAGTTAATAAAT  
CAACTTAAAGGGTATTTTTTCATAAATCCTTTATTAGCTTTAAGTTTAGCTATTACTATTTCTCTTT  
TGCAGGTATTCCTCCTCTTG TAGGGTCTTTGCTAAACAGATGGTATTAAGCGCGGCTATTGATC  
AAGGTTATATCTTTTTATCTTTAGTTGCAATATTAAGTAGTGTTATAGGAGGGGTTTATTATTTAAA  
TATAATTAAGAAATGTTCTTTTATTCACCTGACTATAAATTAACGAAGAAATTAATAAATAATAC  
TATTAATGGTCAAATTATTAATAGAAACAATAAAATATTAATGTTGAATTTAATTATACAAATGT  
AGTTATGTCTAGTTCTGTGGCAATAACTATTTCTACTATTACATTAGTAGTTTTATTATTCATGTTT  
ATGAATAAAGAATGATTAAGTCTGGGTACTATATTGGTACAATCTTTATTTAGCTATTAATGAGTA  
GTATGACATTATTTATAGGGTTTGTATCTGTTATAGCTATTTTATTTTATAGCCATTAATTTATATTT  
GCTCCTCATAATCCTTATCAAGAAAAATATAGTATTTTCGAGTGTGGTTTCCATAGTTTTTTAGGG  
CAAAATAGAACACAATTCGGTATAAAATTCTTTATTTTGTCTTAGTTTATTTACTTTTAGATTTAG  
AAATATTATTAACTTTCCCTTTTCGCTCTTAGTGAGTATGTTAATGGTATTTATGGTCTTTTAGTTAC  
TTTAATTTTTTATAGCTATAATAACTATAGGATTTATATTTGAATTAGGTAAAAGCGCTCTTAAATA  
GACAGCAGACAAAAATTATATATACCTAAATTGAACGTTAATTACCATACAGAGTATGTTGGAAT  
AGGTAAGGTTTCTAAGTAAAGTTATAGAGGCAGAAAACCAAAAAACCTACCAAAGGGTAGCTA  
ATGGGAAGCTATTAATAAATAAAGATGATAACCTATATATAGTATAGTTACTATATATTTACTATA  
ACTAGGATTATTATATATATATATATTATCTTATTGTATATTAAGATTATTATTATTATAAGGTATA  
ATTAATATAGTATCTTATTGTATAAGAATATAATATATTAACCTATAATTAATTTTATTTTTAATTT  
TTAATTATAATTTTTTTTTATATCTAGATGCTTACACATCTACAGATGTAGAAGAGAACAAAATAT  
TGTTGTTATAGTAGTGATATAGAAAAATATTTTTATATTATTTATTTTGTAGGTAGCTTTT  
GAAGTGTTTGATAGAGAGGATATATGGACGGTAGGAGGGTATTCATTTTAATGAACAGTGGATA  
GTTTAAATTAACCTAGTTATAGTTTATGAATTTAAATTATAATTATATTAATGTAGGTATGATAGA  
ATTATGTATTGATCCTTAAGAGTTAAGAGAGATACGCCACGTATAATACATATTGGTTTAGGGT  
TGAGTATATATACTTAAGAGTTAAGAATATATATATACAATATATAATAAATATAGTAATATATTA  
ATGGTATGGACTTAACCAGGTTTATATATTATCATTGATAAACATTAATTATAATTTTTCTATTTA  
TTATTATTATTATACTGTGAGATTAATAATTATTAATAATATAATATTACATAGTACGTGATATTTGG  
GGATTTTATCTTATTAATTGGCAATTAATGATTCTAATCAAATTTTATTCTCTTAGTTTAATGGTA  
GAACAATGATCTTCTAATTCATTGGTTTTAGTTTCGATTCTAAAAAGAGATGAGTAAATAATTTTCT  
AGATCAGAAATACTACTTTTAACTACAAAAAGCTTACGCTTTTAAACATTTTTTGTAAATAACA  
ACTATTGTTAATATTTGGCTGTCTATTGGTTTAACTACAATTACAAAATTTTTCAATTTTTATAAT  
ATAAATTTAAATGAGAATATTAATAAAGTCATTCATTATTAATAAATTAGTGAATTCTTACCTTATCGA  
TGCGTCACAACCAAGTAACATTAGTTACTTGTGAAATTTTGGTTCATTATTAGCTGTTTGTAAAT  
AGTACAAATTATTACCGGTATTACATTAGCTATGCATTATAGTCCTAGTGAATGGAAGCTTTTAA  
CTCAATAGAGCATATAATGAGAGATGTTAATAACGGGTGATTAGTTCGTTATCTACATAGTAATA  
CAGCTTCTGCTTTCTTTTCTTAGTGATTTACACATAGGAAGAGGTATATATTACGGATCATATA  
GAGCTCCTCGTACTTTAGTTTGAGCTATTGGTACTGTTATATTAATTAATGATGGCTATCGGTT  
TCCTAGGTTATGTTTTACCTTATGGACAGATGTCATTATGAGGTGCTACAGTTATTACTAATCTTA  
TTAGTGCTATACCTGAATAGGGCAAGATATTGTTGAATTCATTTGAGGTGGTTTTTCTGTAAATA  
ATGCCACTTTAAACAGATTTTTTGCAATTACATTTTGATTGCCTTTTGATTAGCTGCTTAGTTTA  
ATGCACTTAATTGCACTTCATGATACTGCTGGTTCAAGCAATCCTCTTGGTGTTTCAGGTAATTAC  
GATAGAATTACATTTGCTCCATATTTTTATTTAAAGATTTAATTACTATTTTTATATTTATTTTGT  
TTAAGTGCTTTTGATTCTTTATGCCTAATGTTTTAGGGGATAGTGATAATTATATTATGGCTAATC  
CTATGCAAACCTCCTGCTGCTATTGTACCTGAATGATACTTATTACCTTTCTATGCTATTTTAAGATC

TATACCTAATAAATTATTAGGTGTTATAGCGATGTTTAGTGCTATTTTAGCTATTATGTTATTACCT  
GTTACAGATTTAGGTAGATCTAGAGGTTTACAATTTAGACCATTTAGTAAAATAGCTTTCTGAGTT  
TTTGTTGCTAATTTCTTAGTTTTAATGCAATTAGGTGCTAAACACGTTGAAGATCCATTTATATTAT  
TAGGTCAATTAAGTACTGTATTATACTTTAGTTATTTTGTGCTATATTACCTTTAGCTAGTTACTT  
AGATAATAGTTTAACTGATTTATCTAATAAATCTGAATTATTTTAAATAAACTAACTAAATATAT  
TAAGATTATTATTTAATATATTTTCTATTTAAGATACTATTAATTTAGTATTTTGGGTTTTAGTTTA  
TAATTTATATTATATTATGCATTACCCTCCACCTTGCTTTGTAGTAAGCTAATCTGTTATTTCTTTA  
GTTTAATGGTAGAACAATGATCTTCTAATTCATTGGTTTTAGTTCGAATCTAAAAAGGAAATAAG  
AAATATATTCTTATTATTACTTATATAATAATTATTTCTTAAAAATATACATTTTGCATTATAGCCGT  
TTAGCTGTATTAAATGTAAATGATATAAAATAGAATAAATATTTAAATTATTCCTATGTTATATT  
ATCCTATATTGCAACCATTATCAGAAGTTGTATTAATACTTGTACCTGCCTTATTAGCTGTAGCTT  
ATGTTACAGTTGCTGAAAGAAAACTATGGCTAGTATGCAAAGAAGATTAGGTCCTAATGCTGT  
AGGTTACTATGGACTATTGCAAGCATTTGCTGATGCCTTAAACTTTTTATTAAAGAATATGTAG  
CTCCTACACAATCTAATATTGTTCTTTTCTTTTAGGTCCTGTAATAACTTTAATTTTTGCATTATTA  
GGTTACGCTGTTATACCCTATGGTCCTGGTTCAGGGATAAGCGACATGAATTTAGGTATATTTTA  
CATGTTAGCTGTGTCATCTTTAGCTACATACGGTATTCTATTAGCTGGTTGAAGTGCGAATAGTA  
AATACGCTTTTCTAGGTTCTCTTAGAAGTACAGCTCAATTAATTAGTTATGAATTAATATTAAGTT  
CAGCTATATTAATAGTAATTATGATAACAGGAAATTTAAATTTAACTGTTTGTACTGAATCTCAAA  
GAGCTATTTGATTTATACTACCTTTATTTCTGTGTTTATAATATTTTTCATAGGATCTATAGCTGA  
GACAAATAGAGCTCCTTTTGATTTAGCCGAGGCTAACCTGCTAATCTGGTTTGGTCTGGTTATAT  
GTCACAAATTGCTAGGAAACCTTTTTATTTTAAAAACAAAAGACAATTAGCAGGAACTTAATTT  
AACCTAATTAATAAATTAGATAATTAACTCTTCATAGACTAAACGTGACAATTTAATATATATA  
TATATTTATTTATATATATGATTAAATAAGATATAGTCAATCATCGGTGTGAATCGACTTAAAAAA  
AAAAGCACATGGGTAAACCCATCTCCCCTTATTAGGGGAATCAGAACTTGTTAGTGGGTTTCAT  
GACAGAGCATGCTGCCGTAGTTTTCGTATTCTTCTTTTAGCTGAGTACGGTAGTATTGTACTAAT  
GTGTATTTTAACTAGTATATTATTTATTGGTGGTTACTTATTATTTGAAATATCCTATGTTTTACTG  
TGGTAAATTATATTTTCTTTGAATTATTCTTTATAGACTGAGTAACATTTGTAGAGGTACAATCTTT  
ATACACTGATTTTTTAAATAATTCTATCATTGAAGGATTATTATATGGGTTTAACTAGGATTAAA  
AAGTTCTTTAATGATATTCACATTTATTTGAGCTAGAGCATCCTTCCCTAGAATACGATTTGATCA  
ACTAATGGGCTTCTGTTGAACAGTTTTATTACCTATTAATTTTGCAATTATTATATTAGTACCTTGT  
GTTTTATATAGTTTTAACTTATTACCTGTAAATATACCATTGTTCTAGCTCACACACCCGCCGCC  
CTACTGCCACAAGGCTACAGTACATATGAGGAGGGGAATAAGATCTAGAACTATCCTAGTTA  
ATAATTACACTTAATAGTATACTAAATAGACCATCTATCACTCGAGAATAGTGATAGTGTAAT  
TATACACTATTTTAACTGTATTCTACACTATTAGCATATTATTATCTTTATATGATAATAATTTTATA  
ACTTAATTTATTAGGTTACATTAACAAAAAATTCGTTAACTTTTTTCACCACTTTTAAATACAAAAAT  
ACGAATTTTA

>YN220

ATAACAATTCTAAAGAACATAAAGAGTTATTAGATAAAAAATAATTCACCTATACAGTTAATAAAT  
CAACTTAAAGGGTATTTTTTCATAAATCCTTTATTAGCTTTAAGTTTAGCTATTACTATTTTCTCTTT  
TGCAGGTATTCCTCCTCTGTAGGGTTCTTTGCTAAACAGATGGTATTAAGCGCGGCTATTGATC  
AAGGTTATATCTTTTATCTTTAGTTGCAATATTAAGTGTATAGGAGGGGTTTATTATTTAAA  
TATAATTAAGAAATGTTCTTTTATTCACCTGACTATAAATTAACGAAGAAATTAATAAATAATAC  
TATTAATGGTCAAATTATTAATAGAAACAATAAAATATTAATGTTGAATTTAATTATACAAATGT  
AGTTATGTCTAGTTCTGTGGCAATAACTATTTCTACTATTACATTAGTAGTTTTATTATTCATGTTT

ATGAATAAAGAATGATTAAGTCTGGGTACTATATTGGTACAATCTTTATTTAGCTATTAATGAGTA  
GTATGACATTATTTATAGGGTTTGTATCTGTTATAGCTATTTTATTTTATAGCCATTAATTTTATATTT  
GCTCCTCATAATCCTTATCAAGAAAAATATAGTATTTTCGAGTGTGGTTTCCATAGTTTTTATAGG  
CAAAATAGAACACAATTCGGTATAAAATTCCTTATTTTGTCTTAGTTTATTTACTTTTATAGATTTAG  
AAATATTATTAACCTTTCCCTTTTCGCTCTTAGTGAGTATGTTAATGGTATTTATGGTCTTTTATGTTAC  
TTTAATTTTATAGCTATAATAACTATAGGATTTATATTTGAATTAGGTAAAAGCGCTCTTAAAATA  
GACAGCAGACAAAAATTATATATACCTAAATTGAACGTTAATTACCATACAGAGTATGTTGGAAT  
AGGTAAGGTTTCTAAGTAAAGTTATAGAGGCAGAAAACCAAAAAACCTACCAAAGGGTAGCTA  
ATGGGAAGCTATTAATAAATAAAGATGATAACCTATATATAGTATAGTTACTATATATTTACTATA  
ACTAGGATTATTATATATATATATATTATCTTATTGTATATTAAGATTATTATTATTATAAGGTATA  
ATTAATATAGTATCTTATTGTATAAGAATATAATATATTAACCTATAATTAATTTTATTTTAAATTT  
TTAATTATAATTTTTTTTTTATATCTAGATGCTTACACATCTACAGATGTAGAAGAGAACAAAATAT  
TGTTGTTATAGTAGTGGATGATATAGAAAAATATTTTATATTATTTATTTTGTAGGTAGCTTTT  
GAAGTGTGATAGAGAGGATATATGGACGGTAGGAGGGTATTCATTTTAATGAACAGTGGATA  
GTTTAAATTAACCTAGTTATAGTTTATGAATTTAAATTATAATTATATTAATGTAGGTATGATAGA  
ATTATGTATTGATCCTTAAGAGTTAAGAGAGATACGCCACGTATAATACATATTGGTTTAGGGT  
TGAGTATATATACTTAAGAGTTAAGAATATATATATACAATATATAATAAATATAGTAATATATTA  
ATGGTATGGACTTAACCAGGTTTATATATTATCATTTGATAAACATTAATTATAATTTTCTATTTA  
TTATTATTATTACTGTGAGATTAATAATTATTAATAATATAATTACATAGTACGTGATATTTGG  
GGATTTTATCTTATTAATTGGCAATTAATGATTCTAATCAAATTTTATTCTCTTTAGTTTAAATGGTA  
GAACAATGATCTTCTAATTCATTGGTTTTAGTTTCGATTCTAAAAAGAGATGAGTAAATAATTTTCT  
AGATCAGAAATACTACTTTTAACTACAAAAAGCTTACGCTTTTAAACATTTTTTTGATAAATAACA  
ACTATTGTTAATATTTGGCTGTCTATTGGTTTAACTACAATTACAAAATTTTTCAATTTTTATAAT  
ATAAATTTAAATGAGAATATTAATAAAGTCATTCAATTATTAATAATTAGTGAATTCCTACCTTATCGA  
TGCGTCACAACCAAGTAACATTAGTTACTTGTGAAATTTTGGTTCATTATTAGCTGTTTGTTAAT  
AGTACAAATTATTACCGGTATTACATTAGCTATGCATTATAGTCCTAGTGTAATGGAAGCTTTTAA  
CTCAATAGAGCATATAATGAGAGATGTTAATAACGGGTGATTAGTTCGTTATCTACATAGTAATA  
CAGCTTCTGCTTTCTTTTCTTAGTGATTACACATAGGAAGAGGTATATATTACGGATCATATA  
GAGCTCCTCGTACTTTAGTTTGAGCTATTGGTACTGTTATATTAATTAATGATGGCTATCGGT  
TCCTAGGTATGTTTTACCTTATGGACAGATGTCATTATGAGGTGCTACAGTTATTACTAATCTTA  
TTAGTGCTATACCTGAATAGGGCAAGATATTGTTGAATTCATTTGAGGTGGTTTTCTGTTAATA  
ATGCCACTTTAAACAGATTTTTGCATTACATTTGTATTGCCTTTTGTATTAGCTGCTTTAGTTTAA  
ATGCACTTAATTGCACTTCATGATACTGCTGGTTCAAGCAATCCTCTTGGTGTTTACAGGTAATTAC  
GATAGAATTACATTTGCTCCATATTTTTATTTAAAGATTTAATTACTATTTTATATTTATTTTGT  
TTAAGTGCTTTTGTATTCTTTATGCCTAATGTTTTAGGGGATAGTGATAATTATATTATGGCTAATC  
CTATGCAAACCTCCTGCTGCTATTGTACCTGAATGATACTTATTACCTTCTATGCTATTTTAAAGATC  
TATACCTAATAAATTATTAGGTGTTATAGCGATGTTTAGTGCTATTTTATAGCTATTATGTTATTACCT  
GTTACAGATTTAGGTAGATCTAGAGGTTTACAATTTAGACCATTTAGTAAATAGCTTTCTGAGTT  
TTTGTGCTAATTTCTTAGTTTTAATGCAATTAGGTGCTAAACACGTTGAAGATCCATTTATATTAT  
TAGGTCAATTAAGTACTGTATTATACTTTAGTTATTTTGTGCTATATTACCTTTAGCTAGTTACTT  
AGATAATAGTTTAACTGATTTATCTAATAAATCTGAATTATTTTAAATAAACTAACTAAATATAT  
TAAGATTATTATTTAATATATTTTCTATTTAAGATACTATTAATTTAGTATTTTGGGTTTTAGTTT  
TAATTTATATTATATTATGCATTACCTCCACCTTGCTTTGTAGTAAGCTAATCTGTTATTTCTTTA  
GTTAATGGTAGAACAATGATCTTCTAATTCATTGGTTTTAGTTTGAATCTAAAAAGGAAATAAG

AAATATATTCTTATTATTACTTATATAATAATTATTTCTTAAAAATATACATTTTGCATTATAGCCGT  
TTAGCTGTATTAAAATGTAAAATGATATAAAATAGAATAAATATTTAAATTATTCCTATGTTATATT  
ATCCTATATTGCAACCATTATCAGAAGTTGTATTAATACTTGTACCTGCCTTATTAGCTGTAGCTT  
ATGTTACAGTTGCTGAAAGAAAACTATGGCTAGTATGCAAAGAAGATTAGGTCCTAATGCTGT  
AGGTTACTATGGACTATTGCAAGCATTTGCTGATGCCTTAAAACTTTTATTAAGAATATGTAG  
CTCCTACACAATCTAATATTGTTCTTTTCTTTTAGGTCCTGTAATAACTTTAATTTTGCATTATTA  
GGTTACGCTGTTATACCCTATGGTCCTGGTTCAGGGATAAGCGACATGAATTTAGGTATATTTTA  
CATGTTAGCTGTGTCATCTTTAGCTACATACGGTATTCTATTAGCTGGTTGAAGTGCGAATAGTA  
AATACGCTTTTCTAGGTTCTCTTAGAAGTACAGCTCAATTAATTAGTTATGAATTAATATTAAGTT  
CAGCTATATTAATAGTAATTATGATAACAGGAAATTTAAATTTAACTGTTTGTACTGAATCTCAAA  
GAGCTATTTGATTTATACTACCTTTATTTCTGTGTTTATAATATTTTTCATAGGATCTATAGCTGA  
GACAAATAGAGCTCCTTTTGATTTAGCCGAGGCTAACCTGCTAATCTGGTTTGGTCTGGTTATAT  
GTCACAAATTGCTAGGAAACCTTTTTATTTAAAAACAAAAGACAATTAGCAGGAAACTTAATTT  
AACCTAATTAATAATTAGATAATTAACCTCTTCATAGACTAAACGTGACAATTTAATATATATA  
TATATTTATTTATATATATGATTAATAAGATATAGTCAATCATCGGTGTGAATCGACTTAAAAAA  
AAAAGCACATGGGTAAACCCATCTCCCTTATTAGGGGAATCAGAACTTGTTAGTGGGTTTCAT  
GACAGAGCATGCTGCCGTAGTTTTCGTATTCTTCTTTTAGCTGAGTACGGTAGTATTGTACTAAT  
GTGTATTTTAACTAGTATATTATTTATTGGTGGTTACTTATTATTTGAAATATCCTATGTTTTACTG  
TGGTAAATTATATTTTCTTTGAATTATTCTTTATAGACTGAGTAACATTTGTAGAGGTACAATCTTT  
ATACACTGATTTTTTAAATAATTCTATCATTGAAGGATTATTATATGGGTTAATCTAGGATTA  
AAGTTCTTTAATGATATTCACATTTATTTGAGCTAGAGCATCCTTCCCTAGAATACGATTTGATCA  
ACTAATGGGCTTCTGTTGAACAGTTTTATTACCTATTAATTTTGCAATTATTATATTAGTACCTTGT  
GTTTTATATAGTTTTAACTTATTACCTGTAAATATACCATTGTTCTAGCTCACACACCCGCCGCC  
CTACTGCCACAAGGCTACAGTACATATGAGGAGGGGAATAAGATCTAGAATACTATCCTAGTTA  
ATAATTACACTTAATAGTATACTAAATAGACCATCTATCATACTCGAGAATAGTGATAGTGTAAT  
TATACACTATTTTAACTGTATTCTACACTATTAGCATATTATTATCTTTATATGATAATAATTTTATA  
ACTTAATTTATTAGGTTACATTAACAAAAAATTCGTTAACTTTTTTCACCACTTTTAAACAAAAT  
ACGAATTTTA

>YN226

ATAACAATTCTAAAGAACATAAAGAGTTATTAGATAAAAAATAATTCACCTATACAGTTAATAAAT  
CAACTTAAAGGGTATTTTTTCATAAATCCTTATTAGCTTTAAGTTTAGCTATTACTATTTTCTCTTT  
TGCAGGTATTCTCCTCTTGTAGGGTTCTTTGCTAAACAGATGGTATTAAGCGCGGCTATTGATC  
AAGGTTATATCTTTTATCTTTAGTTGCAATATTAAGTGTATAGGAGGGGTTTATTATTTAAA  
TATAATTAAGAAATGTTCTTTTATTCACCTGACTATAAATTAACGAAGAAATTAATAATAC  
TATTAATGGTCAAATTATTAATAGAAACAATAAAATATTAATGTTGAATTTAATTATACAAATGT  
AGTTATGTCTAGTTCTGTGGCAATAACTATTTCTACTATTACATTAGTAGTTTTATTATTCATGTTT  
ATGAATAAAGAATGATTAAGTCTGGGTACTATATTGGTACAATCTTTATTTAGCTATTAATGAGTA  
GTATGACATTATTTATAGGGTTGTATCTGTTATAGCTATTTTATTTTAGCCATTAATTTATATTT  
GCTCCTCATAATCCTTATCAAGAAAAATATAGTATTTTCGAGTGTGGTTCCATAGTTTTTTAGGG  
CAAAATAGAACACAATTCGGTATAAAATCTTTATTTTGCTTTAGTTTATTTACTTTTAGATTTAG  
AAATATTATTAACTTTCCCTTTCGCTCTTAGTGAGTATGTTAATGGTATTTATGGTCTTTTAGTTAC  
TTTAATTTTATAGCTATAATAACTATAGGATTTATATTTGAATTAGGTAAAAGCGCTCTTAAATA  
GACAGCAGACAAAATTATATATACCTAAATTGAACGTTAATTACCATACAGAGTATGTTGGAAT  
AGGTAAGGTTTCTAAGTAAAGTTATAGAGGCAGAAAACCAAAAAACCTACCAAGGGTAGCTA

ATGGGAAGCTATTA AAAAATAAAAGATGATAACCTATATATAGTATAGTTACTATATATTTACTATA  
ACTAGGATTATTATATATATATATATTATCTTATTGTATATTAAGATTATTATTATTATAAGGTATA  
ATTAATATAGTATCTTATTGTATAAGAATATAATATATTAACCTATAATTAATTTTATTTTTAATTT  
TTAATTATAATTTTTTTTTTATATCTAGATGCTTACACATCTACAGATGTAGAAGAGAACAAAATAT  
TGTTGTTATAGTAGTGGATGATATAGAAAAATATTTTTATATTATTTATTTTTGTTAGGTAGCTTTT  
GAAGTGTTTGATAGAGAGGATATATGGACGGTAGGAGGGTATTCATTTTAATGAACAGTGGATA  
GTTTAAATTAACCTAGTTATAGTTTATGAATTTAAATTATAATTATATTAATGTAGGTTATGATAGA  
ATTATGTATTGATCCTTAAGAGTTAAGAGAGATACGCCACGTATAATACATATTGGTTTAGGGT  
TGAGTATATATACTTAAGAGTTAAGAATATATATATACAATATATAATAAATATAGTAATATATTA  
ATGGTATGGACTTAACCAGGTTTATATATTATCATTTGATAAACATTAATTATAATTTTTCTATTTA  
TTATTATTATTACTGTGAGATTAATAATTATTA AAAATATAATATTACATAGTACGTGATATTTGG  
GGATTTTATCTTATTAATTGGCAATTAATGATTCTAATCAAATTTTATTCTCTTTAGTTTAATGGTA  
GAACAATGATCTTCTAATTCATTGGTTTTAGTTTCGATTCTAAAAAGAGATGAGTAAATAATTTTCT  
AGATCAGAAATACTACTTTTAACTACAAAAAGCTTACGCTTTTAAACATTTTTTTGATAAATAACA  
ACTATTGTTAATATTTGGCTGTCTATTGGTTTAACTAACAATTACAAAATTTTTCAATTTTTATAAT  
ATAAATTTAAATGAGAATATTA AAAAGTCATTCATTATTA AAATTAGTGAATTCCTACCTTATCGA  
TGCGTCACAACCAAGTAACATTAGTTACTTGTGAAATTTTGGTTCATTATTAGCTGTTTGTTAAT  
AGTACAAATTATTACCGGTATTACATTAGCTATGCATTATAGTCCTAGTGAATGGAAGCTTTTAA  
CTCAATAGAGCATATAATGAGAGATGTTAATAACGGGTGATTAGTTCGTTATCTACATAGTAATA  
CAGCTTCTGCTTTCTTTTTCTTAGTGTATTTACACATAGGAAGAGGTATATATTACGGATCATATA  
GAGCTCCTCGTACTTTAGTTTGAGCTATTGGTACTGTTATATTAATTAATGATGGCTATCGGTT  
TCCTAGGTTATGTTTTACCTTATGGACAGATGTCATTATGAGGTGCTACAGTTATTACTAATCTTA  
TTAGTGCTATACCTGAATAGGGCAAGATATTGTTGAATTCATTTGAGGTGGTTTTCTGTTAATA  
ATGCCACTTTAAACAGATTTTTTGCAATTACATTTGTATTGCCTTTTGTATTAGCTGCTTTAGTTTA  
ATGCACTTAATTGCACTTCATGATACTGCTGGTTCAAGCAATCCTCTGGTGTTTCAGGTAATTAC  
GATAGAATTACATTTGCTCCATATTTTTATTTAAAGATTTAATTACTATTTTTATATTTATTTTGTA  
TTAAGTGCTTTTGTATTCTTTATGCCTAATGTTTTAGGGGATAGTGATAATTATATTATGGCTAATC  
CTATGCAAACCTCTGCTGCTATTGTACCTGAATGATACTTATTACCTTTCTATGCTATTTTAAGATC  
TATACCTAATAAATTATTAGGTGTTATAGCGATGTTTAGTGCTATTTTAGCTATTATGTTATTACCT  
GTTACAGATTTAGGTAGATCTAGAGGTTTACAATTTAGACCATTTAGTAAATAGCTTTCTGAGTT  
TTTGTTGCTAATTTCTTAGTTTAAATGCAATTAGGTGCTAAACACGTTGAAGATCCATTTATATTAT  
TAGGTCAATTAAGTACTGTATTATACTTTAGTTATTTTGTTGCTATATTACCTTTAGCTAGTTACTT  
AGATAATAGTTTAACTGATTTATCTAATAAATCTGAATTATTTTAAATAAACTAACTAAATATAT  
TAAGATTATTATTTAATATATTTTCTATTTAAGATACTATTAATTTAGTATTTTGGGTTTTCAGTTTA  
TAATTTATATTATATTATGCATTACCCTCCACCTTGCTTTGTAGTAAGCTAATCTGTTATTTCTTTA  
GTTTAATGGTAGAACAATGATCTTCTAATTCATTGGTTTTAGTTTGAATCTAAAAAGGAAATAAG  
AAATATATTCTTATTATTACTTATATAATAATTATTTCTTAAAAATATACATTTTGCAATTATAGCCGT  
TTAGCTGTATTA AAATGTAAATGATATAAAATAGAATAAATATTTAAATTATTCCTATGTTATATT  
ATCCTATATTGCAACCATTATCAGAAGTTGTATTAATACTTGTACCTGCCTTATTAGCTGTAGCTT  
ATGTTACAGTTGCTGAAAGAAAACTATGGCTAGTATGCAAAGAAGATTAGGTCCTAATGCTGT  
AGGTTACTATGGACTATTGCAAGCATTTGCTGATGCCTTAAACTTTTATTA AAAGAATATGTAG  
CTCCTACACAATCTAATATTGTTCTTTTCTTTTAGGTCCTGTAATAACTTTAATTTTTGCATTATTA  
GGTTACGCTGTTATACCCTATGGTCCTGGTTCAGGGATAAGCGACATGAATTTAGGTATATTTTA  
CATGTTAGCTGTGTCATCTTTAGCTACATACGGTATTCTATTAGCTGGTTGAAGTGCGAATAGTA

AATACGCTTTTCTAGGTTCTCTTAGAAGTACAGCTCAATTAATTAGTTATGAATTAATATTAAGTT  
CAGCTATATTAATAGTAATTATGATAACAGGAAATTTAAATTTAACTGTTTGTACTGAATCTCAAA  
GAGCTATTTGATTTATACTACCTTTATTTCCCTGTGTTTATAATATTTTTCATAGGATCTATAGCTGA  
GACAAATAGAGCTCCTTTTGATTTAGCCGAGGCTAACCTGCTAATCTGGTTTGGTCTGGTTATAT  
GTCACAAATTGCTAGGAAACCTTTTTATTTTAAAAACAAAAGACAATTAGCAGGAAACTTAATTT  
AACCTAATTAATAATATTAGATAATTAACTCTTCATAGACTAAACGTGACAATTTAATATATATA  
TATATTTATTTATATATATGATTAAATAAGATATAGTCAATCATCGGTGTGAATCGACTTAAAAAA  
AAAAGCACATGGGTAAACCCATCTCCCCTTATTAGGGGAATCAGAACTTGTTAGTGGGTTTCAT  
GACAGAGCATGCTGCCGTAGTTTTCGTATTCTTCTTTTGTAGCTGAGTACGGTAGTATTGTACTAAT  
GTGTATTTTAACTAGTATATTATTTATTGGTGGTTACTTATTATTTGAAATATCCTATGTTTTTACTG  
TGGTAAATTATATTTTCTTTGAATTATTCTTTATAGACTGAGTAACATTTGTAGAGGTACAATCTTT  
ATACACTGATTTTTTAAATAATTCTATCATTGAAGGATTATTATATGGGTTTAACTAGGATTA  
AAGTTCTTTAATGATATTCACATTTATTTGAGCTAGAGCATCCTTCCCTAGAATACGATTTGATCA  
ACTAATGGGCTTCTGTTGAACAGTTTTATTACCTATTAATTTTGAATTATTATATTAGTACCTTGT  
GTTTTATATAGTTTTAACTTATTACCTGTAAATATACCATTGTTCTAGCTCACACACCCGCCGCC  
CTACTGCCACAAGGCTACAGTACATATGAGGAGGGGAATAAGATCTAGAATACTATCCTAGTTA  
ATAATTACACTTAATAGTATACTAAATAGACCATCTATCATACTCGAGAATAGTGATAGTGTAAT  
TATACACTATTTTAACTGTATTCTACACTATTAGCATATTATTATCTTTATATGATAATAATTTTATA  
ACTTAATTTATTAGGTTACATTAACAAAAAATTCGTTAACTTTTTTCACCACTTTTTAATACAAAAT  
ACGAATTA

>YN228

ATAACAATTCTAAAGAACATAAAGAGTTATTAGATAAAAAATAATTCACCTATACAGTTAATAAAT  
CAACTTAAAGGTATTTTTTCATAAATCCTTTATTAGCTTTAAGTTTAGCTATTACTATTTTCTCTTT  
TGCAGGTATTCCTCCTCTTGAGGGTCTTTGCTAAACAGATGGTATTAAGCGCGGCTATTGATC  
AAGGTTATATCTTTTTATCTTTAGTTGCAATATTAAGTGTATAGGAGGGGTTTATTATTTAAA  
TATAATTAAGAAATGTTCTTTTATTCACCTGACTATAAATTAACGAAGAAATTAATAAATAC  
TATTAATGGTCAAATTATTAATAGAAACAATAAAATATTAATGTTGAATTTAATTATACAAATGT  
AGTTATGTCTAGTTCTGTGGCAATAACTATTTCTACTATTACATTAGTAGTTTTATTATTCATGTTT  
ATGAATAAAGAATGATTAAGTCTGGGTACTATATTGGTACAATCTTTATTTAGCTATTAATGAGTA  
GTATGACATTATTTATAGGGTTGTATCTGTTATAGCTATTTTATTTTAGCCATTAATTTATATTT  
GCTCCTCATAATCCTTATCAAGAAAAATATAGTATTTTCGAGTGTGGTTTCCATAGTTTTTTAGGG  
CAAAATAGAACACAATTCGGTATAAAATTCCTTTATTTTGTCTTAGTTTATTTACTTTTAGATTTAG  
AAATATTATTAACTTTCCCTTTCGCTCTTAGTGAGTATGTTAATGGTATTTATGGTCTTTTAGTTAC  
TTTAATTTTTATAGCTATAATAACTATAGGATTTATATTTGAATTAGGTAAAAGCGCTCTTAAATA  
GACAGCAGACAAAAATTATATATACCTAAATTGAACGTTAATTACCATACAGAGTATGTTGGAAT  
AGGTAAGGTTTCTAAGTAAAGTTATAGAGGCAGAAAACCAAAAAACCTACCAAAGGGTAGCTA  
ATGGGAAGCTATTAATAAATAAAGATGATAACCTATATATAGTATAGTTACTATATATTTACTATA  
ACTAGGATTATTATATATATATATATTATCTTATTGTATATTAAGATTATTATTATAAGGTATA  
ATTAATATAGTATCTTATTGTATAAGAATATAATATATTAACCTATAATTAATTTTATTTTTAATTT  
TTAATTATAATTTTTTTTTATATCTAGATGCTTACACATCTACAGATGTAGAAGAGAACAAAATAT  
TGTTGTTATAGTAGTGATATAGAAAAATATTTTATATTATTTTATTTTGTAGGTAGCTTTT  
GAAGTGTTGATAGAGAGGATATATGGACGGTAGGAGGGTATTCATTTAATGAACAGTGGATA  
GTTTAAATTAACCTAGTTATAGTTTATGAATTTAAATTATAATTATTAATGTAGGTTATGATAGA  
ATTATGTATTGATCCTTAAGAGTTAAGAGAGATACGCCACGTATAATACATATTGGTTTAGGGT

TGAGTATATATACTTAAGAGTTAAGAATATATATATACAATATATAATAAATATAGTAATATATTA  
ATGGTATGGACTTAACCAGGTTTATATATTATCATTTGATAAACATTAATTATAATTTTTCTATTTA  
TTATTATTATTACTGTGAGATTAATAATTATTAATAATATTACATAGTACGTGATATTTGG  
GGATTTTATCTTATTAATTGGCAATTAATGATTCTAATCAAATTTTATTCTCTTTAGTTTAAATGGTA  
GAACAATGATCTTCTAATTCATTGGTTTTAGTTCGATTCTAAAAAGAGATGAGTAAATAATTTTCT  
AGATCAGAAATACTACTTTTAACTACAAAAAGCTTACGCTTTTTAACATTTTTTGATAAATAACA  
ACTATTGTTAATATTTGGCTGTCTATTGGTTTAACTAACAATTACAAAATTTTTCAATTTTTATAAT  
ATAAATTTAAATGAGAATATTAATAAGTCATTCAATTATTAATAATTAGTGAATCTTACCTTATCGA  
TGCGTCACAACCAAGTAACATTAGTTACTTGTGAAATTTTGGTTCATTATTAGCTGTTTGTTAAT  
AGTACAAATTATTACCGGTATTACATTAGCTATGCATTATAGTCCTAGTGAATGGAAGCTTTTAA  
CTCAATAGAGCATATAATGAGAGATGTTAATAACGGGTGATTAGTTCGTTATCTACATAGTAATA  
CAGCTTCTGCTTTCTTTTTCTTAGTGTATTTACACATAGGAAGAGGTATATATTACGGATCATATA  
GAGCTCCTCGTACTTTAGTTTGAGCTATTGGTACTGTTATTAATTAATGATGGCTATCGGTT  
TCCTAGGTTATGTTTTACCTTATGGACAGATGTCATTATGAGGTGCTACAGTTATTACTAATCTTA  
TTAGTGCTATACCTGAATAGGGCAAGATATTGTTGAATTCATTGAGGTGGTTTTCTGTTAATA  
ATGCCACTTTAAACAGATTTTTGCATTACATTTGTATTGCCTTTGTATTAGCTGCTTAGTTTTA  
ATGCACTTAATTGCACTTCATGATACTGCTGGTTCAAGCAATCCTCTTGGTGTTTCAGGTAATTAC  
GATAGAATTACATTTGCTCCATATTTTTATTTAAAGATTTAATTACTATTTTTATTTATTTTTGTA  
TTAAGTGCTTTTGATTCTTTATGCCTAATGTTTTAGGGGATAGTGATAATTATATTATGGCTAATC  
CTATGCCAACTCCTGCTGCTATTGTACCTGAATGATACTTATTACCTTTCTATGCTATTTTAAGATC  
TATACCTAATAAATTATTAGGTGTTATAGCGATGTTTAGTGCTATTTAGCTATTATGTTATTACCT  
GTTACAGATTTAGGTAGATCTAGAGGTTTACAATTTAGACCATTTAGTAAATAGCTTTCTGAGTT  
TTTGTTGCTAATTTCTTAGTTTTAATGCAATTAGGTGCTAAACACGTTGAAGATCCATTATATTAT  
TAGGTCAATTAAGTACTGTATTATACTTTAGTTATTTTTGTTGCTATATTACCTTTAGCTAGTTACTT  
AGATAATAGTTTAACTGATTTATCTAATAAATCTGAATTATTTTAAATAAACTAACTAAATATAT  
TAAGATTATTATTTAATATATTTTCTATTTAAGATACTATTAATTTAGTATTTTGGGTTTTAGTTTA  
TAATTTATATTATATTATGCATTACCCTCCACCTTGCTTTGTAGTAAGCTAATCTGTTATTTCTTTA  
GTTTAATGGTAGAACAATGATCTTCTAATTCATTGGTTTTAGTTCGAATCTAAAAAGGAAATAAG  
AAATATATTCTTATTATTACTTATATAATAATTATTTCTTAAAAATATACATTTTGCATTATAGCCGT  
TTAGCTGTATTAAATGTAAATGATATAAAATAGAATAAATATTTAAATTATTCCTATGTTATATT  
ATCCTATATTGCAACCATTATCAGAAGTTGTATTAATACTTGTACCTGCCTTATTAGCTGTAGCTT  
ATGTTACAGTTGCTGAAAGAAAACTATGGCTAGTATGCAAAGAAGATTAGGTCCTAATGCTGT  
AGGTTACTATGGACTATTGCAAGCATTTGCTGATGCCTTAAACTTTTTATTAAGAATATGTAG  
CTCCTACACAATCTAATATTGTTCTTTCTTTTAGGTCCTGTAATAACTTTAATTTTTGCATTATTA  
GGTTACGCTGTTATACCCTATGGTCCTGGTTCAGGGATAAGCGACATGAATTTAGGTATATTTTA  
CATGTTAGCTGTGTCATCTTTAGCTACATACGGTATTCTATTAGCTGGTTGAAGTGCGAATAGTA  
AATACGCTTTTCTAGGTTCTCTTAGAAGTACAGCTCAATTAATTAGTTATGAATTAATTAAGTT  
CAGCTATATTAATAGTAATTATGATAACAGGAAATTTAAATTTAACTGTTTGTACTGAATCTCAAA  
GAGCTATTTGATTTATACTACCTTTATTTCTGTGTTTATAATTTTTTCATAGGATCTATAGCTGA  
GACAAATAGAGCTCCTTTGATTTAGCCGAGGCTAACCTGCTAATCTGGTTTGGTCTGGTTATAT  
GTCACAAATTGCTAGGAAACCTTTTTATTTAAAAACAAAAGACAATTAGCAGGAACTTAATTT  
AACCTAATTAATAATATTAGATAATTAACTCTTCATAGACTAAACGTGACAATTTAATATATATA  
TATATTTATTTATATATATGATTAAATAAGATATAGTCAATCATCGGTGTGAATCGACTTAAAAAA  
AAAAGCACATGGGTAAACCCATCTCCCCTTATTAGGGGAATCAGAACTTGTTAGTGGGTTTCAT

GACAGAGCATGCTGCCGTAGTTTTCGTATTCTTCTTTTAGCTGAGTACGGTAGTATTGTACTAAT  
GTGTATTTAACTAGTATATTATTTATTGGTGGTTACTTATTATTTGAAATATCCTATGTTTTACTG  
TGGTAAATTATATTTTCTTTGAATTATTCTTTATAGACTGAGTAACATTTGTAGAGGTACAATCTTT  
ATACACTGATTTTTTAAATAATTCTATCATTGAAGGATTATTATATGGGTTAATCTAGGATTAAA  
AAGTTCTTTAATGATATTCACATTTATTTGAGCTAGAGCATCCTTCCCTAGAATACGATTTGATCA  
ACTAATGGGCTTCTGTTGAACAGTTTTATTACCTATTAATTTTGCAATTATTATATTAGTACCTTGT  
GTTTTATATAGTTTTAACTTATTACCTGTAAATATACCATTGTTCTAGCTCACACACCCGCCGCC  
CTACTGCCACAAGGCTACAGTACATATGAGGAGGGGAATAAGATCTAGAATACTCTAGTTA  
ATAATTACACTTAATAGTATACTAAATAGACCATCTATCATACTCGAGAATAGTGATAGTGTAAT  
TATACACTATTTTAACTGTATTCTACACTATTAGCATATTATTATCTTTATATGATAATAATTTATA  
ACTTAATTTATTAGGTTACATTAACAAAAAATTCGTTAACTTTTTTACCACCTTTTAAATACAAAAT  
ACGAATTATA

>YN232

ATAACAATTCTAAAGAACATAAAGAGTTATTAGATAAAAAATAATTCACCTATACAGTTAATAAAT  
CAACTTAAAGGGTATTTTTTCATAAATCCTTTATTAGCTTTAAGTTTAGCTATTACTATTTTCTCTTT  
TGCAGGTATTCCTCCTCTTGTAGGGTTCTTTGCTAAACAGATGGTATTAAGCGCGGCTATTGATC  
AAGGTTATATCTTTTTATCTTTAGTTGCAATATTAAGTGTATAGGAGGGGTTTATTATTTAAA  
TATAATTAAGAAATGTTCTTTTATTCACCTGACTATAAATTAACGAAGAAATTAATAAATAC  
TATTAATGGTCAAATTATTAATAGAAACAATAAAATATTAAATGTTGAATTTAATTATACAAATGT  
AGTTATGTCTAGTTCTGTGGCAATAACTATTTCTACTATTACATTAGTAGTTTTATTATTCATGTTT  
ATGAATAAAGAATGATTAAGTCTGGGTACTATATTGGTACAATCTTTATTTAGCTATTAATGAGTA  
GTATGACATTATTTATAGGGTTTGTATCTGTTATAGCTATTTTATTTTAGCCATTAATTTATATTT  
GCTCCTCATAATCCTTATCAAGAAAAATATAGTATTTTCGAGTGTGGTTTCCATAGTTTTTAGGG  
CAAAATAGAACACAATTCGGTATAAAATCTTTATTTTTGCTTTAGTTTATTTACTTTTAGATTTAG  
AAATATTATTAACTTTCCCTTTCGCTCTTAGTGAGTATGTTAATGGTATTTATGGTCTTTTAGTTAC  
TTTAATTTTTATAGCTATAATAACTATAGGATTTATATTTGAATTAGGTAAAAGCGCTCTTAAATA  
GACAGCAGACAAAAATTATATATACCTAAATTGAACGTTAATTACCATACAGAGTATGTTGGAAT  
AGGTAAGGTTTCTAAGTAAAGTTATAGAGGCAGAAAACCAAAAAACCTACCAAAGGGTAGCTA  
ATGGGAAGCTATTAATAAATAAAGATGATAACCTATATATAGTATAGTTACTATATATTTACTATA  
ACTAGGATTATTATATATATATATATTATCTTATTGTATATTAAGATTATTATTATAAGGTATA  
ATTAATATAGTATCTTATTGTATAAGAATATAATATATTAACCTATAATTAATTTTATTTTAAATTT  
TTAATTATAATTTTTTTTTATATCTAGATGCTTACACATCTACAGATGTAGAAGAGAACAAAATAT  
TGTTGTTATAGTAGTGGATGATATAGAAAAATATTTTTATATTATTTATTTTGTAGGTAGCTTTT  
GAAGTGTGATAGAGAGGATATATGGACGGTAGGAGGGTATTCATTTAATGAACAGTGGATA  
GTTTAAATTAACCTAGTTATAGTTTATGAATTTAAATTATAATTATATTAATGTAGGTATGATAGA  
ATTATGTATTGATCCTTAAGAGTTAAGAGAGATACGCCACGTATAATACATATTGGTTTAGGGT  
TGAGTATATATACTTAAGAGTTAAGAATATATATATACAATATATAATAAATATAGTAATATATTA  
ATGGTATGGACTTAACCAGTTTATATATTATCATTTGATAAACATTAATTATAATTTTCTATTTA  
TTATTATTATTACTGTGAGATTAATAATTATTAATAATATTACATAGTACGTGATATTTGG  
GGATTTTATCTTATTAATTGGCAATTAATGATTCTAATCAAATTTTATTCTCTTTAGTTTAAATGGTA  
GAACAATGATCTTCTAATTCATTGGTTTTAGTTTCGATTCTAAAAAGAGATGAGTAAATAATTTTCT  
AGATCAGAAATACTACTTTTAACTACAAAAAGCTTACGCTTTTTAACATTTTTTTGATAAATAACA  
ACTATTGTTAATATTTGGCTGTCTATTGGTTTAACTACAATTACAAAATTTTTCAATTTTTATAAT  
ATAAATTTAAATGAGAATATTAATAAAGTCATTCAATTATTAATAATTAGTGAATCTTACCTTATCGA

TGCGTCACAACCAAGTAACATTAGTTACTTGTGAAATTTTGGTTCATTATTAGCTGTTTGTTAAT  
AGTACAAATTATTACCGGTATTACATTAGCTATGCATTATAGTCCTAGTGTAATGGAAGCTTTTAA  
CTCAATAGAGCATATAATGAGAGATGTTAATAACGGGTGATTAGTTCGTTATCTACATAGTAATA  
CAGCTTCTGCTTTCTTTTCTTAGTGATTTACACATAGGAAGAGGTATATATTACGGATCATATA  
GAGCTCCTCGTACTTTAGTTTGAGCTATTGGTACTGTTATATTAATATTAATGATGGCTATCGGT  
TCCTAGGTTATGTTTTACCTTATGGACAGATGTCATTATGAGGTGCTACAGTTACTAATCTTA  
TTAGTGCTATACCTGAATAGGGCAAGATATTGTTGAATTCATTTGAGGTGGTTTTCTGTTAATA  
ATGCCACTTTAAACAGATTTTTGCATTACATTTGTATTGCCTTTGTATTAGCTGCTTTAGTTTA  
ATGCACTTAATTGCACTTCATGATACTGCTGGTTCAAGCAATCCTCTGGTGTTTCAGGTAATTAC  
GATAGAATTACATTTGCTCCATATTTTTATTTAAAGATTTAATTACTATTTTTATATTTATTTTGT  
TTAAGTGCTTTGTATTCTTTATGCCTAATGTTTTAGGGGATAGTGATAATTATATTATGGCTAATC  
CTATGCAAACCTCCTGCTGCTATTGTACCTGAATGATACTTATTACCTTTCTATGCTATTTTAAGATC  
TATACCTAATAAATTATTAGGTGTTATAGCGATGTTTAGTGCTATTTAGCTATTATGTTATTACCT  
GTTACAGATTTAGGTAGATCTAGAGGTTTACAATTTAGACCATTTAGTAAATAGCTTTCTGAGTT  
TTTGTTGCTAATTTCTTAGTTTTAATGCAATTAGGTGCTAAACACGTTGAAGATCCATTTATATTAT  
TAGGTCAATTAAGTACTGTATTATACTTTAGTTATTTTGTTGCTATATTACCTTTAGCTAGTTACTT  
AGATAATAGTTTAACTGATTTATCTAATAAATCTGAATTATTTTAAATAAAACTAACTAAATATAT  
TAAGATTATTATTTAATATATTTCTATTTAAGATACTATTAATTTAGTATTTTGGGTTTTAGTTTA  
TAATTTATATTATATTATGCATTACCCTCCACCTTGCTTTGTAGTAAGCTAATCTGTTATTTCTTTA  
GTTTAATGGTAGAACAATGATCTTCTAATTCATTGGTTTTAGTTTGAATCTAAAAAGGAAATAAG  
AAATATATTCTTATTATTACTTATATAATAATTATTTCTTAAAAATATACATTTTGCAATTATAGCCGT  
TTAGCTGTATTAAATGTAAATGATATAAAATAGAATAAATATTTAAATTATTCCTATGTTATATT  
ATCCTATATTGCAACCATTATCAGAAGTTGTATTAATACTTGTACCTGCCTTATTAGCTGTAGCTT  
ATGTTACAGTTGCTGAAAGAAAACTATGGCTAGTATGCAAAGAAGATTAGGTCCTAATGCTGT  
AGGTTACTATGGACTATTGCAAGCATTGCTGATGCCTTAAACTTTTATTTAAAGAATATGTAG  
CTCCTACACAATCTAATATTGTTCTTTTCTTTTAGGTCTGTAAATAACTTTAATTTTGCAATTATTA  
GGTTACGCTGTTATACCCTATGGTCCTGGTTCAGGGATAAGCGACATGAATTTAGGTATATTTTA  
CATGTTAGCTGTGTCATCTTTAGCTACATACGGTATTCTATTAGCTGGTTGAAGTGCGAATAGTA  
AATACGCTTTTCTAGGTTCTCTTAGAAGTACAGCTCAATTAATTAGTTATGAATTAATATTAAGTT  
CAGCTATATTAATAGTAATTATGATAACAGGAAATTTAAATTTAACTGTTTGACTGAATCTCAAA  
GAGCTATTTGATTTATACTACCTTTATTTCTGTGTTTATAATATTTTTCATAGGATCTATAGCTGA  
GACAAATAGAGCTCCTTTGATTTAGCCGAGGCTAACCTGCTAATCTGGTTTGGTCTGGTTATAT  
GTCACAAATTGCTAGGAAACCTTTTTATTTAAAAACAAAAGACAATTAGCAGGAAACTTAATTT  
AACCTAATTAATAAATTATTAGATAAATAAATCTTTCATAGACTAAACGTGACAATTTAATATATATA  
TATATTTATTTATATATATGATTAATAAAGATATAGTCAATCATCGGTGTGAATCGACTTAAAAAA  
AAAAGCACATGGGTAAACCCATCTCCCCTTATTAGGGGAATCAGAACTTGTTAGTGGGTTTCAT  
GACAGAGCATGCTGCCGTAGTTTTCGTATTCTTCTTTTAGCTGAGTACGGTAGTATTGTACTAAT  
GTGTATTTTAACTAGTATATTATTTATTGGTGGTTACTTATTATTTGAAATATCCTATGTTTTACTG  
TGGTAAATTATATTTCTTTGAATTATCTTTATAGACTGAGTAACATTTGTAGAGGTACAATCTTT  
ATACACTGATTTTTTAAATAATTCTATCATTGAAGGATTATTATATGGGTTAATCTAGGATTAAA  
AAGTTCTTTAATGATATTCACATTTATTTGAGCTAGAGCATCCTTCCCTAGAATACGATTTGATCA  
ACTAATGGGCTTCTGTTGAACAGTTTTATTACCTATTAATTTTGCAATTATTATATTAGTACCTTGT  
GTTTTATATAGTTTTAACTTATTACCTGTAAATATACCATTGTTCTAGCTCACACACCCGCCGCC  
CTACTGCCACAAGGCTACAGTACATATGAGGAGGGGAAGTAAAGATCTAGAAGTATCCTAGTTA

ATAATTACACTTAATAGTATACTAAATAGACCATCTATCATACTCGAGAATAGTGATAGTGTAAT  
TATACACTATTTTAACTGTATTCTACACTATTAGCATATTATTATCTTTATATGATAATAATTTTATA  
ACTTAATTTATTAGGTTACATTAACAAAAAATTCGTTAACTTTTTTCACCACTTTTAAATACAAAAT  
ACGAATTTTA

>YN239

ATAACAATTCTAAAGAACATAAAGAGTTATTAGATAAAAAATAATTCACCTATACAGTTAATAAAT  
CAACTTAAAGGGTATTTTTTCATAAATCCTTTATTAGCTTTAAGTTTAGCTATTACTATTTTCTCTTT  
TGCAGGTATTCCTCCTCTGTAGGGTTCTTTGCTAAACAGATGGTATTAAGCGCGGCTATTGATC  
AAGGTTATATCTTTTTATCTTTAGTTGCAATATTAAGTGTATAGGAGGGGTTTATTATTTAAA  
TATAATTAAGAAATGTTCTTTTATTCACCTGACTATAAATTAAACGAAGAAATTAATAAATAC  
TATTAATGGTCAAATTATTAATAGAAACAATAAAATATTAATGTTGAATTTAATTATACAAATGT  
AGTTATGTCTAGTTCTGTGGCAATAACTATTTCTACTATTACATTAGTAGTTTTATTATTCATGTTT  
ATGAATAAAGAATGATTAAGTCTGGGTACTATATTGGTACAATCTTTATTTAGCTATTAATGAGTA  
GTATGACATTATTTATAGGGTTTGTATCTGTTATAGCTATTTTATTTTAGCCATTAATTTTATATTT  
GCTCCTCATAATCCTTATCAAGAAAAATATAGTATTTTCGAGTGTGGTTTCCATAGTTTTTTAGGG  
CAAAATAGAACACAATTCGGTATAAAATCCTTATTTTGTCTTAGTTTATTTACTTTTAGATTTAG  
AAATATTATTAACTTTCCCTTTCGCTCTTAGTGAGTATGTTAATGGTATTTATGGTCTTTTAGTTAC  
TTTAATTTTATAGCTATAATAACTATAGGATTTATATTTGAATTAGGTAAAAGCGCTCTTAAATA  
GACAGCAGACAAAAATTATATATACCTAAATTGAACGTTAATTACCATACAGAGTATGTTGGAAT  
AGGTAAGGTTTCTAAGTAAAGTTATAGAGGCAGAAAACCAAAAAACCTACCAAAGGGTAGCTA  
ATGGGAAGCTATTAATAAAGATGATAACCTATATATAGTATAGTTACTATATATTTACTATA  
ACTAGGATTATTATATATATATATATTATCTTATTGTATATTAAGATTATTATTATAAGGTATA  
ATTAATATAGTATCTTATTGTATAAGAATATAATATATTAACCTATAATTAATTTTATTTTAAATTT  
TTAATTATAATTTTTTTTTTATATCTAGATGCTTACACATCTACAGATGTAGAAGAGAACAAAATAT  
TGTTGTTATAGTAGTGGATGATATAGAAAAATATTTTTATATTATTTATTTTGTAGGTAGCTTTT  
GAAGTGTTTGATAGAGAGGATATATGGACGGTAGGAGGGTATTCATTTTAATGAACAGTGGATA  
GTTTAAATTAACCTAGTTATAGTTTATGAATTTAAATTATAATTATATTAATGTAGGTTATGATAGA  
ATTATGTATTGATCCTTAAGAGTTAAGAGAGATACGCCACGTATAATACATATTGGTTTAGGGT  
TGAGTATATATACTTAAGAGTTAAGAATATATATATACAATATATAATAAATATAGTAATATATTA  
ATGGTATGGACTTAACCAGGTTTATATATTATCATTGATAAACATTAATTATAATTTTCTATTTA  
TTATTATTATTACTGTGAGATTAATAATTATTAATAATATTACATAGTACGTGATATTTGG  
GGATTTTATCTTATTAATTGGCAATTAATGATTCTAATCAAATTTTATTCTCTTTAGTTTAAATGGTA  
GAACAATGATCTTCTAATTCATTGGTTTTAGTTTCGATTCTAAAAAGAGATGAGTAAATAATTTTCT  
AGATCAGAAATACTACTTTTAACTACAAAAAGCTTACGCTTTTAAACATTTTTTTGATAAATAACA  
ACTATTGTTAATATTTGGCTGTCTATTGGTTTAACTAACAATTACAAAATTTTTCAATTTTTATAAT  
ATAAATTTAAATGAGAATATTAAAAAGTCATTATTAAAAATTAGTGAATTCTTACCTTATCGA  
TGCCTCACAACCAAGTAACATTAGTTACTTGTGAAATTTTGGTTCATTATTAGCTGTTTGTAAAT  
AGTACAAATTATTACCGGTATTACATTAGCTATGCATTATAGTCCTAGTGAATGGAAGCTTTTAA  
CTCAATAGAGCATATAATGAGAGATGTTAATAACGGGTGATTAGTTCGTTATCTACATAGTAATA  
CAGCTTCTGCTTTCTTTTCTTAGTGTATTTACACATAGGAAGAGGTATATATTACGGATCATATA  
GAGCTCCTCGTACTTTAGTTTGAGCTATTGGTACTGTTATATTAATTAATGATGGCTATCGGTT  
TCCTAGGTTATGTTTTACCTTATGGACAGATGTCATTATGAGGTGCTACAGTTATTACTAATCTTA  
TTAGTGCTATACCTGAATAGGGCAAGATATTGTTGAATTCATTTGAGGTGGTTTTCTGTAAATA  
ATGCCACTTAAACAGATTTTTTGCATTACATTTGTATTGCCTTTGTATTAGCTGCTTTAGTTTAA

ATGCACTTAATTGCACTTCATGATACTGCTGGTTCAAGCAATCCTCTTGGTGTTTCAGGTAATTAC  
GATAGAATTACATTTGCTCCATATTTTTATTTAAAGATTTAATTACTATTTTTATATTTATTTTTGTA  
TTAAGTGCTTTTGATTCTTTATGCCTAATGTTTTAGGGGATAGTGATAATTATATTATGGCTAATC  
CTATGCAAACCTCCTGCTGCTATTGTACCTGAATGATACTTATTACCTTTCTATGCTATTTTAAGATC  
TATACCTAATAAATTATTAGGTGTTATAGCGATGTTTAGTGCTATTTTAGCTATTATGTTATTACCT  
GTTACAGATTTAGGTAGATCTAGAGGTTTACAATTTAGACCATTTAGTAAAATAGCTTTCTGAGTT  
TTTGTTGCTAATTTCTTAGTTTTAATGCAATTAGGTGCTAAACACGTTGAAGATCCATTTATATTAT  
TAGGTCAATTAAGTACTGTATTATACTTTAGTTATTTTTGTTGCTATATTACCTTTAGCTAGTACTT  
AGATAATAGTTTAACTGATTTATCTAATAAATCTGAATTATTTTTAAATAAACTAACTAAATATAT  
TAAGATTATTATTTAATATATTTTCTATTTAAGATACTATTAATTTAGTATTTTGGGTTTTAGTTTA  
TAATTTATATTATATTATGCATTACCCTCCACCTTGCTTTGTAGTAAGCTAATCTGTTATTTCTTTA  
GTTTAATGGTAGAACAATGATCTTCTAATTCATTGGTTTTAGTTCGAATCTAAAAAGGAAATAAG  
AAATATATTCTTATTATTACTTATATAATAATTATTTCTTAAAAATATACATTTTGCAATTATAGCCGT  
TTAGCTGTATTAAAAATGTAAATGATATAAAATAGAATAAATATTTAAATTATTCCTATGTTATATT  
ATCCTATATTGCAACCATTATCAGAAGTTGTATTAATACTTGTACCTGCCTTATTAGCTGTAGCTT  
ATGTTACAGTTGCTGAAAGAAAACTATGGCTAGTATGCAAAGAAGATTAGGTCCTAATGCTGT  
AGGTTACTATGGACTATTGCAAGCATTTGCTGATGCCTTAAACCTTTTATTAAGAATATGTAG  
CTCCTACACAATCTAATATTGTTCTTTTCTTTTAGGTCCTGTAATAACTTTAATTTTGCATTATTA  
GGTTACGCTGTTATACCCTATGGTCCTGGTTCAGGGATAAGCGACATGAATTTAGGTATATTTTA  
CATGTTAGCTGTGTCATCTTTAGCTACATACGGTATTCTATTAGCTGGTTGAAGTGCGAATAGTA  
AATACGCTTTTCTAGGTTCTCTTAGAAGTACAGCTCAATTAATTAGTTATGAATTAATTAAGTT  
CAGCTATATTAATAGTAATTATGATAACAGGAAATTTAAATTTAACTGTTTGTACTGAATCTCAAA  
GAGCTATTTGATTTATACTACCTTTATTTCTGTGTTTATAATATTTTTCATAGGATCTATAGCTGA  
GACAAATAGAGCTCCTTTTGATTTAGCCGAGGCTAACCTGCTAATCTGGTTTGGTCTGGTTATAT  
GTCACAAATTGCTAGGAAACCTTTTTATTTAAAAACAAAAGACAATTAGCAGGAACTTAATTT  
AACCTAATTAATAATTAGATAAATAAATCTTTCATAGACTAAACGTGACAATTTAATATATATA  
TATATTTATTTATATATATGATTAATAAGATATAGTCAATCATCGGTGTGAATCGACTTAAAAAA  
AAAAGCACATGGGTAAACCCATCTCCCCTTATTAGGGGAATCAGAACTTGTTAGTGGGTTTCAT  
GACAGAGCATGCTGCCGTAGTTTTCGTATTCTTCTTTTATAGCTGAGTACGGTAGTATTGTACTAAT  
GTGTATTTTAACTAGTATATTATTTATTGGTGGTTACTTATTATTTGAAATATCCTATGTTTTTACTG  
TGGTAAATTATATTTTCTTTGAATTATTCTTTATAGACTGAGTAACATTTGTAGAGGTACAATCTTT  
ATACACTGATTTTTTAAATAATTCTATCATTGAAGGATTATTATATGGGTTTAATCTAGGATTA  
AAGTTCTTTAATGATATTCACATTTATTTGAGCTAGAGCATCCTTCCCTAGAATACGATTTGATCA  
ACTAATGGGCTTCTGTTGAACAGTTTTATTACCTATTAATTTTGAATTATTATATTAGTACCTTGT  
GTTTTATATAGTTTTAACTTATTACCTGTAAATATACCATTGTTCTAGCTCACACACCCGCCGCC  
CTACTGCCACAAGGCTACAGTACATATGAGGAGGGGAATAAGATCTAGAACTATCCTAGTTA  
ATAATTACACTTAATAGTATACTAAATAGACCATCTATCATACTCGAGAATAGTGATAGTGTAAT  
TATACACTATTTTAACTGTATTCTACACTATTAGCATATTATTATCTTTATATGATAATAATTTTATA  
ACTTAATTTATTAGGTTACATTAACAAAAAATTCGTTAACTTTTTTACCACCTTTTAAATACAAAAT  
ACGAATTTTA

>YN247

ATAACAATTCTAAAGAACATAAAGAGTTATTAGATAAAAAATAATTCACCTATACAGTTAATAAAT  
CAACTTAAAGGTATTTTTTCATAAATCCTTTATTAGCTTTAAGTTTAGCTATTACTATTTTCTCTTT  
TGCAGGTATTCCTCCTCTTGTAGGGTTCTTTGCTAAACAGATGGTATTAAGCGCGGCTATTGATC

AAGGTTATATCTTTTTATCTTTAGTTGCAATATTAAGTGTATAGGAGGGGTTTATTATTTAAA  
TATAATTAAGAAATGTTCTTTTATTCACCTGACTATAAATTAACGAAGAAATTAATAATAC  
TATTAATGGTCAAATTATTAAGAAACAATAAAATATTAATGTTGAATTTAATTATACAAATGT  
AGTTATGTCTAGTTCTGTGGCAATAACTATTTCTACTATTACATTAGTAGTTTTATTATTCATGTTT  
ATGAATAAAGAATGATTAAGTCTGGGTACTATATTGGTACAATCTTTATTTAGCTATTAATGAGTA  
GTATGACATTATTTATAGGGTTTGTATCTGTTATAGCTATTTTATTTTAGCCATTAATTTTATATTT  
GCTCCTCATAATCCTTATCAAGAAAAATATAGTATTTTCGAGTGTGGTTTCCATAGTTTTTTAGGG  
CAAAATAGAACACAATTCGGTATAAAATCTTTATTTTGCTTTAGTTTATTTACTTTTAGATTTAG  
AAATATTATTAACCTTCCCTTCGCTCTTAGTGAGTATGTTAATGGTATTTATGGTCTTTTAGTTAC  
TTTAATTTTTATAGCTATAATAACTATAGGATTTATATTTGAATTAGGTAAGCGCTCTTAAATA  
GACAGCAGACAAAAATTATATACCTAAATTGAACGTTAATTACCATACAGAGTATGTTGGAAT  
AGGTAAGGTTTCTAAGTAAAGTTATAGAGGCAGAAAACCAAAAAACCTACCAAAGGGTAGCTA  
ATGGGAAGCTATTAATAAAAGATGATAACCTATATATAGTATAGTTACTATATATTTACTATA  
ACTAGGATTATTATATATATATATATTATCTTATTGTATATTAAGATTATTATTATTATAAGGTATA  
ATTAATATAGTATCTTATTGTATAAGAATATAATATATTAACCTATAATTAATTTTATTTTTAATTT  
TTAATTATAATTTTTTTTTATATCTAGATGCTTACACATCTACAGATGTAGAAGAGAACAAAATAT  
TGTTGTTATAGTAGTGGATGATATAGAAAAATATTTTTATATTATTTATTTTGTAGGTAGCTTTT  
GAAGTGTGATAGAGAGGATATATGGACGGTAGGAGGTATTCATTTAATGAACAGTGGATA  
GTTTAAATTAACCTAGTTATAGTTTATGAATTTAAATTATAATTATATTAATGTAGGTTATGATAGA  
ATTATGTATTGATCCTTAAGAGTTAAGAGAGATACGCCCACGTATAATACATATTGGTTTAGGGT  
TGAGTATATATACTTAAGAGTTAAGAATATATATATACAATATATAATAAATATAGTAATATATTA  
ATGGTATGGACTTAACCAGGTTTATATATTATCATTTGATAAACATTAATTATAATTTTTCTATTTA  
TTATTATTATACTGTGAGATTAATAATTATTAATAATATTACATAGTACGTGATATTTGG  
GGATTTTATCTTATTAATTGGCAATTAATGATTCTAATCAAATTTTATTCTCTTTAGTTTAAATGGTA  
GAACAATGATCTTCTAATTCATTGGTTTTAGTTGATTCTAAAAAGAGATGAGTAAATAATTTCT  
AGATCAGAAATACTACTTTTAACTACAAAAAGCTTACGCTTTTAAACATTTTTTGATAAATAACA  
ACTATTGTTAATATTTGGCTGTCTATTGGTTTAACTAACAATTACAAAATTTTTCAATTTTTATAAT  
ATAAATTTAAATGAGAATATTAATAAGTCATTATTATTAATAATAGTGAATCTTACCTTATCGA  
TGCGTCACAACCAAGTAACATTAGTTACTTGTGAAATTTTGGTTCATTATTAGCTGTTTGTTAAT  
AGTACAAATTATTACCGGTATTACATTAGCTATGCATTATAGTCCTAGTGAATGGAAGCTTTTAA  
CTCAATAGAGCATATAATGAGAGATGTTAATAACGGGTGATTAGTTCGTTATCTACATAGTAATA  
CAGCTTCTGCTTCTTTTTCTTAGTGATTTACACATAGGAAGAGGTATATATTACGGATCATATA  
GAGCTCCTCGTACTTTAGTTGAGCTATTGGTACTGTTATTAATTAATGATGGCTATCGGTT  
TCCTAGGTTATGTTTTACCTTATGGACAGATGTCATTATGAGGTGCTACAGTTATTACTAATCTTA  
TTAGTGCTATACCTGAATAGGGCAAGATATTGTTGAATTCATTTGAGGTGGTTTTCTGTTAATA  
ATGCCACTTTAAACAGATTTTTGCATTACATTTGTATTGCCTTTGTATTAGCTGCTTTAGTTTA  
ATGCACTTAATTGCACTTCATGATACTGCTGGTTCAAGCAATCCTCTTGGTGTTCAGGTAATTAC  
GATAGAATTACATTTGCTCCATATTTTTATTTAAAGATTTAATTACTATTTTTATTTATTTTGTA  
TTAAGTGCTTTTGTATTCTTTATGCCTAATGTTTTAGGGGATAGTGATAATTATATTATGGCTAATC  
CTATGCAAACCTCCTGCTGCTATTGTACCTGAATGATACTTATTACCTTTCTATGCTATTTTAAGATC  
TATACCTAATAAATTATTAGGTGTTATAGCGATGTTTAGTGCTATTTAGCTATTATGTTATTACCT  
GTTACAGATTTAGGTAGATCTAGAGGTTTACAATTTAGACCATTTAGTAAATAGCTTTCTGAGTT  
TTTGTTGCTAATTTCTTAGTTTAAATGCAATTAGGTGCTAAACACGTTGAAGATCCATTTATATTAT  
TAGGTCAATTAAGTACTGTATTATACTTTAGTTATTTTGTGCTATATTACCTTTAGCTAGTTACTT

AGATAATAGTTTAACTGATTTATCTAATAAATCTGAATTATTTTTAAATAAACTAACTAAATATAT  
TAAGATTATTATTTAATATATTTTCTATTTAAGATACTATTAATTTAGTATTTTGGGTTTTCAGTTTA  
TAATTTATATTATATTATGCATTACCCTCCACCTTGCTTTGTAGTAAGCTAATCTGTTATTTCCCTTA  
GTTTAATGGTAGAACAATGATCTTCTAATTCATTGGTTTTAGTTCGAATCTAAAAAGGAAATAAG  
AAATATATTCTTATTATTACTTATATAATAATTATTTCTTAAAAATATACATTTTGCATTATAGCCGT  
TTAGCTGTATTAAAATGTAAAATGATATAAAATAGAATAAATATTTAAATTATTCCTATGTTATATT  
ATCCTATATTGCAACCATTATCAGAAAGTTGTATTAATACTTGTACCTGCCTTATTAGCTGTAGCTT  
ATGTTACAGTTGCTGAAAGAAAACTATGGCTAGTATGCAAAGAAGATTAGGTCCTAATGCTGT  
AGGTTACTATGGACTATTGCAAGCATTGCTGATGCCTTAAACTTTTTATTAAGAATATGTAG  
CTCCTACACAATCTAATATTGTTCTTTTCTTTTAGGTCCTGTAATAACTTTAATTTTTGCATTATTA  
GGTTACGCTGTTATACCCTATGGTCCTGGTTCAGGGATAAGCGACATGAATTTAGGTATATTTTA  
CATGTTAGCTGTGTCATCTTTAGCTACATACGGTATTCTATTAGCTGGTTGAAGTGCGAATAGTA  
AATACGCTTTTCTAGGTTCTCTTAGAAGTACAGCTCAATTAATTAGTTATGAATTAATTAAGTT  
CAGCTATATTAATAGTAATTATGATAACAGGAAATTTAAATTTAACTGTTTGTACTGAATCTCAAA  
GAGCTATTTGATTTATACTACCTTTATTTCTGTGTTTATAATTTTTCATAGGATCTATAGCTGA  
GACAAATAGAGCTCCTTTTGATTTAGCCGAGGCTAACCTGCTAATCTGGTTTGGTCTGGTTATAT  
GTCACAAATTGCTAGGAAACCTTTTTATTTAAAAACAAAAGACAATTAGCAGGAAACTTAATTT  
AACCTAATTAATAATTAGATAATTAACTCTTCATAGACTAAACGTGACAATTTAATATATATA  
TATATTTATTTATATATATGATTAAATAAGATATAGTCAATCATCGGTGTGAATCGACTTAAAAAA  
AAAAGCACATGGGTAAACCCATCTCCCCTTATTAGGGGAATCAGAACTTGTTAGTGGGTTTCAT  
GACAGAGCATGCTGCCGTAGTTTTCGTATTCTTCTTTTAGCTGAGTACGGTAGTATTGTACTAAT  
GTGTATTTTAACTAGTATATTATTTATTGGTGGTTACTTATTATTTGAAATATCCTATGTTTTACTG  
TGGTAAATTATATTTCTTTGAATTATTCTTTATAGACTGAGTAACATTTGTAGAGGTACAATCTTT  
ATACACTGATTTTTTAAATAATTCTATCATTGAAGGATTATTATATGGGTTTAACTAGGATTAAA  
AAGTTCTTTAATGATATTCACATTTATTTGAGCTAGAGCATCCTTCCCTAGAATACGATTTGATCA  
ACTAATGGGCTTCTGTTGAACAGTTTTATTACCTATTAATTTTGCAATTATTATATTAGTACCTTGT  
GTTTTATATAGTTTTAACTTATTACCTGTAAATATACCATTGTTCTAGCTCACACACCCGCCGCC  
CTACTGCCACAAGGCTACAGTACATATGAGGAGGGGAACTAAAGATCTAGAACTATCCTAGTTA  
ATAATTACACTTAATAGTATACTAAATAGACCATCTATCATACTCGAGAATAGTGATAGTGAAT  
TATACACTATTTTAACTGTATTCTACACTATTAGCATATTATTATCTTTATATGATAATAATTTATA  
ACTTAATTTATTAGGTTACATTAACAAAAAATTCGTTAACTTTTTTCACCACTTTTAAATACAAAAT  
ACGAATTTTA

>YN268

ATAACAATTCTAAAGAACATAAAGAGTTATTAGATAAAAAATAATTCACCTATACAGTTAATAAAT  
CAACTTAAAGGGTATTTTTTCATAAATCCTTTATTAGCTTTAAGTTTAGCTATTACTATTTCTCTTT  
TGCAGGTATTCCTCCTCTTGTAGGGTTCTTGCTAAACAGATGGTATTAAGCGCGGCTATTGATC  
AAGGTTATATCTTTTTATCTTTAGTTGCAATATTAAGTGTATAGGAGGGGTTTATTATTTAAA  
TATAATTAAGAAATGTTCTTTTATTCACCTGACTATAAATTAAACGAAGAAATTAATAAATAC  
TATTAATGGTCAAATTATTAATAGAAACAATAAAATATTAAATGTTGAATTTAATTATACAAATGT  
AGTTATGTCTAGTTCTGTGGCAATAACTATTTCTACTATTACATTAGTAGTTTTATTATTCATGTTT  
ATGAATAAAGAATGATTAAGTCTGGGTACTATATTGGTACAATCTTTATTTAGCTATTAATGAGTA  
GTATGACATTATTTATAGGGTTTGTATCTGTTATAGCTATTTTATTTTAGCCATTAATTTATATTT  
GCTCCTCATAATCCTTATCAAGAAAAATATAGTATTTTCGAGTGTGGTTTCCATAGTTTTTAGGG  
CAAAATAGAACACAATTCGGTATAAAATCTTTATTTTGTCTTAGTTTATTTACTTTTAGATTTAG

AAATATTATTAACTTTCCCTTTTCGCTCTTAGTGAGTATGTTAATGGTATTTATGGTCTTTTAGTTAC  
TTTAATTTTTATAGCTATAATAACTATAGGATTTATATTTGAATTAGGTAAAAGCGCTCTTAAAATA  
GACAGCAGACAAAAATTATATATACCTAAATTGAACGTTAATTACCATACAGAGTATGTTGGAAT  
AGGTAAGGTTTCTAAGTAAAGTTATAGAGGCAGAAAACCAAAAAACCTACCAAAGGGTAGCTA  
ATGGGAAGCTATTAATAAATAAAGATGATAACCTATATATAGTATAGTTACTATATATTTACTATA  
ACTAGGATTATTATATATATATATATTATCTTATTGTATATTAAGATTATTATTATAAGGTATA  
ATTAATATAGTATCTTATTGTATAAGAATATAATATATTAACCTATAATTAATTTTATTTTTTAATTT  
TTAATTATAATTTTTTTTTTATATCTAGATGCTTACACATCTACAGATGTAGAAGAGAACAAAATAT  
TGTTGTTATAGTAGTGGATGATATAGAAAAATTTTTTATATTATTTATTTTTGTTAGGTAGCTTTT  
GAAGTGTTTGATAGAGAGGATATATGGACGGTAGGAGGGTATTCATTTTAATGAACAGTGGAATA  
GTTTAAATTAACCTAGTTATAGTTTATGAATTTAAATTATAATTATATTAATGTAGGTTATGATAGA  
ATTATGTATTGATCCTTAAGAGTTAAGAGAGATACGCCCACGTATAATACATATTGGTTTAGGGT  
TGAGTATATATACTTAAGAGTTAAGAATATATATATACAATATATAATAAATATAGTAATATATTA  
ATGGTATGGACTTAACCAGGTTTATATATTATCATTTGATAAACATTAATTATAATTTTTCTATTTA  
TTATTATTATTATACTGTGAGATTAATAATTATTAATAATATAATATTACATAGTACGTGATATTTGG  
GGATTTTATCTTATTAATTGGCAATTAATGATTCTAATCAAATTTTATTCTCTTTAGTTTAATGGTA  
GAACAATGATCTTCTAATTCATTGGTTTTAGTTTCGATTCTAAAAAGAGATGAGTAAATAATTTTCT  
AGATCAGAAATACTACTTTTAACTACAAAAGCTTACGCTTTTTAACATTTTTTTGATAAATAACA  
ACTATTGTTAATATTTGGCTGTCTATTGGTTTAACTAACAATTACAAAATTTTTTCAATTTTTATAAT  
ATAAATTTAAATGAGAATATTAATAAAGTCATTCAATTATTAATAATTAGTGAATTCTTACCTTATCGA  
TGCGTCACAACCAAGTAACATTAGTTACTTGTGAAATTTTGGTTCATTATTAGCTGTTTGTTAAT  
AGTACAAATTATTACCGGTATTACATTAGCTATGCATTATAGTCCTAGTGAATGGAAGCTTTTAA  
CTCAATAGAGCATATAATGAGAGATGTTAATAACGGGTGATTAGTTCGTTATCTACATAGTAATA  
CAGCTTCTGCTTTCTTTTTCTTAGTGATTTACACATAGGAAGAGGTATATATTACGGATCATATA  
GAGCTCCTCGTACTTTAGTTTGAGCTATTGGTACTGTTATATTAATTAATGATGGCTATCGGTT  
TCCTAGGTTATGTTTTACCTTATGGACAGATGTCATTATGAGGTGCTACAGTTATTACTAATCTTA  
TTAGTGCTATACCTGAATAGGGCAAGATATTGTTGAATTCATTTGAGGTGGTTTTTCTGTTAATA  
ATGCCACTTTAAACAGATTTTTTGCAATTACATTTGTATTGCCTTTTGTATTAGCTGCTTTAGTTTA  
ATGCACTTAATTGCACTTCATGATACTGCTGGTTCAAGCAATCCTCTTGGTGTTTCAGGTAATTAC  
GATAGAATTACATTTGCTCCATATTTTTATTTAAAGATTTAATTACTATTTTTATATTTATTTTGTA  
TTAAGTGCTTTTGATTCTTTATGCCTAATGTTTTAGGGGATAGTGATAATTATATTATGGCTAATC  
CTATGCAAACCTCCTGCTGCTATTGTACCTGAATGATACTTATTACCTTTCTATGCTATTTTAAGATC  
TATACCTAATAAATTATTAGGTGTTATAGCGATGTTTAGTGCTATTTAGCTATTATGTTATTACCT  
GTTACAGATTTAGGTAGATCTAGAGGTTTACAATTTAGACCATTTAGTAAATAGCTTCTGAGTT  
TTTGTTGCTAATTTCTTAGTTTAAATGCAATTAGGTGCTAAACACGTTGAAGATCCATTTATATTAT  
TAGGTCAATTAAGTACTGTATTATACTTTAGTTATTTTGTTGCTATATTACCTTTAGCTAGTTACTT  
AGATAATAGTTTAACTGATTTATCTAATAAATCTGAATTATTTTAAATAAACTAACTAAATATAT  
TAAGATTATTATTTAATATATTTTCTATTTAAGATACTATTAATTTAGTATTTTGGGTTTTAGTTTA  
TAATTTATATTATATTATGCATTACCCTCCACCTTGCTTTGTAGTAAGCTAATCTGTTATTTCTTTA  
GTTTAAATGGTAGAACAAATGATCTTCTAATTCATTGGTTTTAGTTTGAATCTAAAAAGGAAATAAG  
AAATATATTCTTATTATTACTTATATAATAATTATTTCTTAAAAATATACATTTTGCAATTATAGCCGT  
TTAGCTGTATTAAATGTAAATGATATAAAATAGAATAAATATTTAAATTATTCCTATGTTATATT  
ATCCTATATTGCAACCATTATCAGAAGTTGTATTAATACTTGTACCTGCCTTATTAGCTGTAGCTT  
ATGTTACAGTTGCTGAAAGAAAACTATGGCTAGTATGCAAAGAAGATTAGGTCCTAATGCTGT

AGGTTACTATGGACTATTGCAAGCATTGCTGATGCCTTAAACCTTTTATTTAAAGAATATGTAG  
CTCCTACACAATCTAATATTGTTCTTTTCTTTTAGGTCCTGTAATAACTTTAATTTTGCATTATTA  
GGTTACGCTGTTATACCCTATGGTCCTGGTTCAGGGATAAGCGACATGAATTTAGGTATATTTTA  
CATGTTAGCTGTGTCATCTTTAGCTACATACGGTATTCTATTAGCTGGTTGAAGTGCGAATAGTA  
AATACGCTTTTCTAGGTTCTCTTAGAAGTACAGCTCAATTAATTAGTTATGAATTAATATTAAGTT  
CAGCTATATTAATAGTAATTATGATAACAGGAAATTTAAATTTAACTGTTTGTACTGAATCTCAAA  
GAGCTATTTGATTTATACTACCTTTATTTCTGTGTTTATAATATTTTTCATAGGATCTATAGCTGA  
GACAAATAGAGCTCCTTTTGATTTAGCCGAGGCTAACCTGCTAATCTGGTTTGGTCTGGTTATAT  
GTCACAAATTGCTAGGAAACCTTTTTATTTTAAAAACAAAAGACAATTAGCAGGAACTTAATTT  
AACCTAATTAATAATATTAGATAATTAACTCTTCATAGACTAAACGTGACAATTTAATATATATA  
TATATTTATTTATATATATGATTAAATAAGATATAGTCAATCATCGGTGTGAATCGACTTAAAAAA  
AAAAGCACATGGGTAAACCCATCTCCCCTTATTAGGGGAATCAGAAGTTGTTAGTGGGTTTCAT  
GACAGAGCATGCTGCCGTAGTTTTCGTATTCTTCTTTTAGCTGAGTACGGTAGTATTGTACTAAT  
GTGTATTTTAACTAGTATATTATTTATTGGTGGTTACTTATTATTTGAAATATCCTATGTTTTACTG  
TGGTAAATTATATTTTCTTTGAATTATTTCTTTATAGACTGAGTAACATTTGTAGAGGTACAATCTTT  
ATACACTGATTTTTTAAATAATTCTATCATTGAAGGATTATTATATGGGTTTAACTAGGATTAAA  
AAGTTCTTTAATGATATTCACATTTATTTGAGCTAGAGCATCCTTCCCTAGAATACGATTTGATCA  
ACTAATGGGCTTCTGTTGAACAGTTTTATTACCTATTAATTTTGCAATTATTATATTAGTACCTTGT  
GTTTTATATAGTTTTAACTTATTACCTGTAAATATACCATTGTTCTAGCTCACACACCCGCCGCC  
CTACTGCCACAAGGCTACAGTACATATGAGGAGGGGAATAAGATCTAGAAGTATCCTAGTTA  
ATAATTACACTTAATAGTATACTAAATAGACCATCTATCATACTCGAGAATAGTGATAGTGTAAT  
TATACACTATTTTAACTGTATTCTACACTATTAGCATATTATTATCTTTATATGATAATAATTTATA  
ACTTAATTTATTAGGTTACATTAACAAAAAATTCGTTAACTTTTTTCACCACTTTTAAATACAAAAT  
ACGAATTTTA

>YN271

ATAACAATTCTAAAGAACATAAAGAGTTATTAGATAAAAAATAATTCACCTATACAGTTAATAAAT  
CAACTTAAAGGGTATTTTTTCATAAATCCTTTATTAGCTTTAAGTTTAGCTATTACTATTTTCTCTTT  
TGCAGGTATTCCTCCTCTGTAGGGTTCTTTGCTAAACAGATGGTATTAAGCGCGGCTATTGATC  
AAGGTTATATCTTTTTATCTTTAGTTGCAATATTAAGTGTATAGGAGGGGTTTATTATTTAAA  
TATAATTAAGAAATGTTCTTTTATTCACCTGACTATAAATTAACGAAGAAATTAATAAATAC  
TATTAATGGTCAAATTATTAATAGAAACAATAAAATATTAATGTTGAATTTAATTATACAAATGT  
AGTTATGTCTAGTTCTGTGGCAATAACTATTTCTACTATTACATTAGTAGTTTTATTATTCATGTTT  
ATGAATAAAGAATGATTAAGTCTGGGTACTATATTGGTACAATCTTTATTTAGCTATTAATGAGTA  
GTATGACATTATTTATAGGGTTTGTATCTGTTATAGCTATTTTATTTTAGCCATTAATTTTATATTT  
GCTCCTCATAATCCTTATCAAGAAAAATATAGTATTTTCGAGTGTGGTTTCCATAGTTTTTTAGGG  
CAAAATAGAACACAATTCGGTATAAAATCTTTATTTTGCTTTAGTTTATTTACTTTTAGATTTAG  
AAATATTATTAACTTTCCCTTCGCTCTTAGTGAGTATGTTAATGGTATTTATGGTCTTTTAGTTAC  
TTTAATTTTTATAGCTATAATAACTATAGGATTTATATTTGAATTAGGTAAAAGCGCTCTTAAATA  
GACAGCAGACAAAAATTATATATACCTAAATTGAACGTTAATTACCATACAGAGTATGTTGGAAT  
AGGTAAGGTTTCTAAGTAAAGTTATAGAGGCAGAAAACCAAAAAACCTACCAAAGGGTAGCTA  
ATGGGAAGCTATTAAAAATAAAGATGATAACCTATATATAGTATAGTTACTATATATTTACTATA  
ACTAGGATTATTATATATATATATATTATCTTATTGTATATTAAGATTATTATTATTATAAGGTATA  
ATTAATATAGTATCTTATTGTATAAGAATATAATATATTAACCTATAATTAATTTTATTTTAAATTT  
TTAATTATAATTTTTTTTTATATCTAGATGCTTACACATCTACAGATGTAGAAGAGAACAAAATAT

TGTTGTTATAGTAGTGGATGATATAGAAAAATATTTTTATATTATTTATTTTTGTTAGGTAGCTTTT  
GAAGTGTGTTGATAGAGAGGATATATGGACGGTAGGAGGGTATTCATTTTAATGAACAGTGGATA  
GTTTAAATTAACCTAGTTATAGTTTATGAATTTAAATTATAATTATATTAATGTAGGTTATGATAGA  
ATTATGTATTGATCCTTAAGAGTTAAGAGAGATACGCCCACGTATAATACATATTGGTTTAGGGT  
TGAGTATATATACTTAAGAGTTAAGAATATATATATACAATATATAATAAATATAGTAATATATTA  
ATGGTATGGACTTAACCAGGTTTATATATTATCATTGATAAACATTAATTATAATTTTTCTATTTA  
TTATTATTATTATACTGTGAGATTAATAATTATTTAAATATAATATTACATAGTACGTGATATTTGG  
GGATTTTATCTTATTAATTGGCAATTAATGATTCTAATCAAATTTTATTCTCTTTAGTTTAATGGTA  
GAACAATGATCTTCTAATTCATTGGTTTTAGTTTCGATTCTAAAAAGAGATGAGTAAATAATTTTCT  
AGATCAGAAATACTACTTTTAACTACAAAAAGCTTACGCTTTTAAACATTTTTTTGATAAATAACA  
ACTATTGTTAATATTTGGCTGTCTATTGGTTTAACTACAATTACAAAATTTTTTCAATTTTTATAAT  
ATAAATTTAAATGAGAATATTTAAAAAGTCATTCATTATTTAAATTAGTGAATTCTTACCTTATCGA  
TGCGTCACAACCAAGTAACATTAGTTACTTGTGAAATTTTGGTTCATTATTAGCTGTTTGTTAAT  
AGTACAAATTATTACCGGTATTACATTAGCTATGCATTATAGTCCTAGTGAATGGAAGCTTTTAA  
CTCAATAGAGCATATAATGAGAGATGTTAATAACGGGTGATTAGTTCGTTATCTACATAGTAATA  
CAGCTTCTGCTTTCTTTTCTTAGTGTATTTACACATAGGAAGAGGTATATATTACGGATCATATA  
GAGCTCCTCGTACTTTAGTTTGAGCTATTGGTACTGTTATATTAATTAATGATGGCTATCGGTT  
TCCTAGGTTATGTTTTACCTTATGGACAGATGTCATTATGAGGTGCTACAGTTATTACTAATCTTA  
TTAGTGCTATACCTGAATAGGGCAAGATATTGTTGAATTCATTTGAGGTGGTTTTTCTGTTAATA  
ATGCCACTTTAAACAGATTTTTTGCAATTACATTTGTATTGCCTTTGTATTAGCTGCTTTAGTTTAA  
ATGCACTTAATTGCACTTCATGATACTGCTGGTTCAAGCAATCCTCTGGTGTTTCAGGTAATTAC  
GATAGAATTACATTTGCTCCATATTTTTATTTAAAGATTTAATTACTATTTTTATATTTATTTTTGTA  
TTAAGTGCTTTGTATTCTTTATGCCTAATGTTTTAGGGGATAGTGATAATTATATTATGGCTAATC  
CTATGCAAACCTCCTGCTGCTATTGTACCTGAATGATACTTATTACCTTTCTATGCTATTTTAAAGATC  
TATACCTAATAAATTATTAGGTGTTATAGCGATGTTTAGTGCTATTTTAGCTATTATGTTATTACCT  
GTTACAGATTTAGGTAGATCTAGAGGTTTACAATTTAGACCATTTAGTAAAATAGCTTTCTGAGTT  
TTTGTTGCTAATTTCTTAGTTTTAATGCAATTAGGTGCTAAACACGTTGAAGATCCATTTATATTAT  
TAGGTCAATTAAGTACTGTATTATACTTTAGTTATTTTGTGCTATATTACCTTTAGCTAGTTACTT  
AGATAATAGTTTAACTGATTTATCTAATAAATCTGAATTATTTTTAAATAAACTAACTAAATATAT  
TAAGATTATTATTTAATATATTTTCTATTTAAGATACTATTAATTTAGTATTTTGGGTTTTAGTTTA  
TAATTTATATTATATTATGCATTACCCTCCACCTTGCTTTGTAGTAAGCTAATCTGTTATTTCTTTA  
GTTTAATGGTAGAACAATGATCTTCTAATTCATTGGTTTTAGTTTGAATCTAAAAAGGAAATAAG  
AAATATATTCTTATTATTACTTATATAATAATTATTTCTTAAAAATATACATTTTGCAATTATAGCCGT  
TTAGCTGTATTAAATGTAAATGATATAAAATAGAATAAATATTTAAATTATTCCTATGTTATATT  
ATCCTATATTGCAACCATTATCAGAAGTTGTATTAATACTTGTACCTGCCTTATTAGCTGTAGCTT  
ATGTTACAGTTGCTGAAAGAAAACTATGGCTAGTATGCAAAGAAGATTAGGTCCTAATGCTGT  
AGGTTACTATGGACTATTGCAAGCATTTGCTGATGCCTTAAACCTTTTATTAAGAATATGTAG  
CTCCTACACAATCTAATATTGTTCTTTTCTTTTAGGTCCTGTAATAACTTTAATTTTTGCATTATTA  
GGTTACGCTGTTATACCCTATGGTCCTGGTTCAGGATAAGCGACATGAATTTAGGTATATTTTA  
CATGTTAGCTGTGTCATCTTTAGCTACATACGGTATTCTATTAGCTGGTTGAAGTGCGAATAGTA  
AATACGCTTTTCTAGGTTCTCTTAGAAGTACAGCTCAATTAATTAGTTATGAATTAATTAAGTT  
CAGCTATATTAATAGTAATTATGATAACAGGAAATTTAAATTTAACTGTTTGTACTGAATCTCAAA  
GAGCTATTTGATTTATACTACCTTTATTTCTGTGTTTATAATATTTTTCATAGGATCTATAGCTGA  
GACAAATAGAGCTCCTTTTGATTTAGCCGAGGCTAACCTGCTAATCTGGTTTGGTCTGGTTATAT

GTCACAAATTGCTAGGAAACCTTTTTATTTTAAAAACAAAAGACAATTAGCAGGAACTTAATTT  
AACCTAATTAATAATATTAGATAATTAACCTCTTCATAGACTAAACGTGACAATTTAATATATATA  
TATATTTATTTATATATATGATTAAATAAGATATAGTCAATCATCGGTGTGAATCGACTTAAAAAA  
AAAAGCACATGGGTAAACCCATCTCCCCTTATTAGGGGAATCAGAACTTGTTAGTGGGTTTCAT  
GACAGAGCATGCTGCCGTAGTTTTCGTATTCTTCTTTTAGCTGAGTACGGTAGTATTGTACTAAT  
GTGTATTTTAACTAGTATATTATTTATTGGTGGTTACTTATTATTTGAAATATCCTATGTTTTACTG  
TGGTAAATTATATTTTCTTTGAATTATTCTTTATAGACTGAGTAACATTTGTAGAGGTACAATCTTT  
ATACACTGATTTTTTAAATAATTCTATCATTGAAGGATTATTATATGGGTTTAATCTAGGATTAAA  
AAGTTCTTTAATGATATTCACATTTATTTGAGCTAGAGCATCCTTCCCTAGAATACGATTTGATCA  
ACTAATGGGCTTCTGTTGAACAGTTTTATTACCTATTAATTTTGCAATTATTATATTAGTACCTTGT  
GTTTTATATAGTTTTAACTTATTACCTGTAAATATACCATTGTTCTAGCTCACACACCCGCCGCC  
CTACTGCCACAAGGCTACAGTACATATGAGGAGGGGAACCTAAAGATCTAGAACTATCCTAGTTA  
ATAATTACACTTAATAGTATACTAAATAGACCATCTATCATACTCGAGAATAGTGATAGTGTAAT  
TATACACTATTTTAACTGTATTCTACACTATTAGCATATTATTATCTTTATATGATAATAATTTTATA  
ACTTAATTTATTAGGTTACATTAACAAAAAATTCGTTAACTTTTTTCACCACTTTTTAATACAAAAT  
ACGAATTTTA

>YN283

ATAACAATTCTAAAGAACATAAAGAGTTATTAGATAAAAAATAATTCACCTATACAGTTAATAAAT  
CAACTTAAAGGGTATTTTTTCATAAATCCTTTATTAGCTTTAAGTTAGCTATTACTATTTTCTCTTT  
TGCAGGTATTCCTCCTCTTGTAGGGTCTTTGCTAAACAGATGGTATTAAGCGCGGCTATTGATC  
AAGGTTATATCTTTTTATCTTTAGTTGCAATATTAAGTGTATAGGAGGGGTTTATTATTTAAA  
TATAATTAAGAAATGTTCTTTTATTCACCTGACTATAAATTAACGAAGAAATTAATAAATAC  
TATTAATGGTCAAATTATTAATAGAAACAATAAAATATTAATGTTGAATTTAATTATACAAATGT  
AGTTATGTCTAGTTCTGTGGCAATAACTATTTCTACTATTACATTAGTAGTTTTATTATTCATGTTT  
ATGAATAAAGAATGATTAAGTCTGGGTACTATATTGGTACAATCTTTATTTAGCTATTAATGAGTA  
GTATGACATTATTTATAGGGTTTGTATCTGTTATAGCTATTTTATTTTAGCCATTAATTTATATTT  
GCTCCTCATAATCCTTATCAAGAAAAATATAGTATTTTCGAGTGTGGTTTCCATAGTTTTTTAGGG  
CAAAATAGAACACAATTCGGTATAAAATCTTTATTTTGCTTTAGTTTATTTACTTTTAGATTTAG  
AAATATTATTAACCTTTCCCTTTGCTCTTAGTGAGTATGTTAATGGTATTTATGGTCTTTTAGTTAC  
TTTAATTTTTATAGCTATAATAACTATAGGATTTATATTTGAATTAGGTAAAAGCGCTCTTAAATA  
GACAGCAGACAAAAATTATATACCTAAATTGAACGTTAATTACCATACAGAGTATGTTGGAAT  
AGGTAAGGTTTCTAAGTAAAGTTATAGAGGCAGAAAACCAAAAAACCTACCAAAGGGTAGCTA  
ATGGGAAGCTATTAATAAAGATGATAACCTATATATAGTATAGTTACTATATATTTACTATA  
ACTAGGATTATTATATATATATATATTATCTTATTGTATATTAAGATTATTATTATAAGGTATA  
ATTAATATAGTATCTTATTGTATAAGAATATAATATATTAACCTATAATTAATTTATTTTTAATTT  
TTAATTATAATTTTTTTTTATATCTAGATGCTTACACATCTACAGATGTAGAAGAGAACAAAATAT  
TGTTGTTATAGTAGTGATATAGAAAAATATTTTATATTATTTATTTTGTAGGTAGCTTTT  
GAAGTGTGATAGAGAGGATATATGGACGGTAGGAGGTATTCATTTAATGAACAGTGGATA  
GTTTAAATTAACCTAGTTATAGTTTATGAATTTAAATTATAATTATATTAATGTAGGTATGATAGA  
ATTATGTATTGATCCTTAAGAGTTAAGAGAGATACGCCACGTATAATACATATTGGTTAGGGT  
TGAGTATATATACTTAAGAGTTAAGAATATATATATACAATATATAATAAATATAGTAATATATTA  
ATGGTATGGACTTAACCAGGTTTATATATTATCATTTGATAAACATTAATTATAATTTTTCTATTTA  
TTATTATTATACTGTGAGATTAATAATTATTAATAATATTACATAGTACGTGATATTTGG  
GGATTTTATCTTATTAATTGGCAATTAATGATTCTAATCAAATTTTATTCTCTTAGTTAATGGTA

GAACAATGATCTTCTAATTCATTGGTTTTAGTTTCGATTCTAAAAAGAGATGAGTAAATAATTTTCT  
AGATCAGAAATACTACTTTTAACTACAAAAAGCTTACGCTTTTAAACATTTTTTGATAAATAACA  
ACTATTGTTAATATTTGGCTGTCTATTGGTTTAACTAACAATTACAAAATTTTTCAATTTTTATAAT  
ATAAATTTAAATGAGAATATTA AAAAGTCATTATTATTA AAAATTAGTGAATTCTTACCTTATCGA  
TGCGTCACAACCAAGTAACATTAGTTACTTGTGAAATTTTGGTTCATTATTAGCTGTTTGTTAAT  
AGTACAAATTATTACCGGTATTACATTAGCTATGCATTATAGTCCTAGTGAATGGAAGCTTTTAA  
CTCAATAGAGCATATAATGAGAGATGTTAATAACGGGTGATTAGTTCGTTATCTACATAGTAATA  
CAGCTTCTGCTTTCTTTTTCTTAGTGATTTACACATAGGAAGAGGTATATATTACGGATCATATA  
GAGCTCCTCGTACTTTAGTTTGAGCTATTGGTACTGTTATATTAATTAATGATGGCTATCGGT  
TCCTAGGTTATGTTTACCTTATGGACAGATGTCATTATGAGGTGCTACAGTTATTACTAATCTTA  
TTAGTGCTATACCTGAATAGGGCAAGATATTGTTGAATTCATTTGAGGTGGTTTTCTGTTAATA  
ATGCCACTTTAAACAGATTTTTGCATTACATTTGTATTGCCTTTGTATTAGCTGCTTTAGTTTAA  
ATGCACTTAATTGCACTTCATGATACTGCTGGTTCAAGCAATCCTCTGGTGTTTCAGGTAATTAC  
GATAGAATTACATTTGCTCCATATTTTTATTTAAAGATTTAATTACTATTTTTATTTATTTTTGTA  
TTAAGTGCTTTTGTATTCTTTATGCCTAATGTTTTAGGGGATAGTGATAATTATATTATGGCTAATC  
CTATGCAAACCTCTGCTGCTATTGTACCTGAATGATACTTATTACCTTTCTATGCTATTTTAAGATC  
TATACCTAATAAATTATTAGGTGTTATAGCGATGTTTAGTGCTATTTTAGCTATTATGTTATTACCT  
GTTACAGATTTAGGTAGATCTAGAGGTTTACAATTTAGACCATTTAGTAAAATAGCTTTCTGAGTT  
TTTGTTGCTAATTTCTTAGTTTTAATGCAATTAGGTGCTAAACACGTTGAAGATCCATTTATATTAT  
TAGGTCAATTAAGTACTGTATTATACTTTAGTTATTTTTGTTGCTATATTACCTTTAGCTAGTTACTT  
AGATAATAGTTTAACTGATTTATCTAATAAATCTGAATTATTTTAAATAAACTAACTAAATATAT  
TAAGATTATTATTTAATATATTTTCTATTTAAGATACTATTAATTTAGTATTTTGGGTTTTCAGTTTA  
TAATTTATATTATATTATGCATTACCTCCACCTTGCTTTGTAGTAAGCTAATCTGTTATTTCTTTA  
GTTTAATGGTAGAACAATGATCTTCTAATTCATTGGTTTTAGTTTGAATCTAAAAAGGAAATAAG  
AAATATATTCTTATTATTACTTATATAATAATTATTTCTTAAAAATATACATTTTGCATTATAGCCGT  
TTAGCTGTATTA AAAATGTAAAATGATATA AAAATAGAATAAATATTTAAATTATTCCTATGTTATATT  
ATCCTATATTGCAACCATTATCAGAAGTTGTATTAATACTTGTACCTGCCTTATTAGCTGTAGCTT  
ATGTTACAGTTGCTGAAAGAAAACTATGGCTAGTATGCAAAGAAGATTAGGTCCTAATGCTGT  
AGGTTACTATGGACTATTGCAAGCATTTGCTGATGCCTTAAACTTTTATTA AAAAGAATATGTAG  
CTCCTACACAATCTAATATTGTTCTTTTCTTTTAGGTCCTGTAATAACTTTAATTTTTGCATTATTA  
GGTTACGCTGTTATACCCTATGGTCCTGGTTCAGGGATAAGCGACATGAATTTAGGTATATTTTA  
CATGTTAGCTGTGTCATCTTTAGCTACATACGGTATTCTATTAGCTGGTTGAAGTGCGAATAGTA  
AATACGCTTTTCTAGGTTCTCTTAGAAGTACAGCTCAATTAATTAGTTATGAATTAATTAAGTT  
CAGCTATATTAATAGTAATTATGATAACAGGAAATTTAAATTTAACTGTTTGTACTGAATCTCAAA  
GAGCTATTTGATTTATACTACCTTTATTTCTGTGTTTATAATTTTTTCATAGGATCTATAGCTGA  
GACAAATAGAGCTCCTTTTGATTTAGCCGAGGCTAACCTGCTAATCTGGTTTGGTCTGGTTATAT  
GTCACAAATTGCTAGGAAACCTTTTTATTTTAAAAACAAAAGACAATTAGCAGGAAACTTAATTT  
AACCTAATTA AAAATATTAGATAATTAACTCTTCATAGACTAAACGTGACAATTTAATATATATA  
TATATTTATTTATATATATGATTAAATAAGATATAGTCAATCATCGGTGTGAATCGACTTAAAAAA  
AAAAGCACATGGGTAAACCCATCTCCCTTATTAGGGGAATCAGAACTTGTTAGTGGGTTTCAT  
GACAGAGCATGCTGCCGTAGTTTTCGTATTCTTCTTTTAGCTGAGTACGGTAGTATTGTACTAAT  
GTGTATTTTAACTAGTATATTATTTATTGGTGGTTACTTATTATTTGAAATATCCTATGTTTTTACTG  
TGGTAAATTATATTTTCTTTGAATTATTCTTTATAGACTGAGTAACATTTGTAGAGGTACAATCTTT  
ATACACTGATTTTTTAAATAATTCTATCATTGAAGGATTATTATATGGGTTAATCTAGGATTA

AAGTTCTTTAATGATATTCACATTTATTTGAGCTAGAGCATCCTTCCCTAGAATACGATTTGATCA  
ACTAATGGGCTTCTGTTGAACAGTTTTATTACCTATTAATTTTGCAATTATTATATTAGTACCTTGT  
GTTTTATATAGTTTTAACTTATTACCTGTAAATATACCATTGTTCTAGCTCACACACCCGCCGCC  
CTACTGCCACAAGGCTACAGTACATATGAGGAGGGGAACCTAAAGATCTAGAACTATCCTAGTTA  
ATAATTACACTTAATAGTATACTAAATAGACCATCTATCATACTCGAGAATAGTGATAGTGTAAT  
TATACACTATTTTAACTGTATTCTACACTATTAGCATATTATTATCTTTATATGATAATAATTTTATA  
ACTTAATTTATTAGGTTACATTAACAAAAAATTCGTTAACTTTTTTCACCACTTTTTAATACAAAAT  
ACGAATTTTA

>YN311

ATAACAATTCTAAAGAACATAAAGAGTTATTAGATAAAAAATAATTCACCTATACAGTTAATAAAT  
CAACTTAAAGGGTATTTTTTCATAAATCCTTTATTAGCTTTAAGTTTAGCTATTACTATTTCTCTTT  
TGCAGGTATTCTCCTCTTGTAGGGTCTTTGCTAAACAGATGGTATTAAGCGCGGCTATTGATC  
AAGGTTATATCTTTTTATCTTTAGTTGCAATATTAAGTGTATAGGAGGGGTTTATTATTTAAA  
TATAATTAAGAAATGTTCTTTTATTCACCTGACTATAAATTAACGAAGAAATTAATAAATAC  
TATTAATGGTCAAATTATTAATAGAAACAATAAATATTAATGTTGAATTTAATTATACAAATGT  
AGTTATGTCTAGTTCTGTGGCAATAACTATTTCTACTATTACATTAGTAGTTTTATTATTCATGTTT  
ATGAATAAAGAATGATTAAGTCTGGGTACTATATTGGTACAATCTTTATTTAGCTATTAATGAGTA  
GTATGACATTATTTATAGGGTTGTATCTGTTATAGCTATTTTATTTTAGCCATTAATTTATATTT  
GCTCCTCATAATCCTTATCAAGAAAAATATAGTATTTTCGAGTGTGGTTTCCATAGTTTTTTAGGG  
CAAAATAGAACACAATTCGGTATAAAATTCCTTTATTTTGTCTTAGTTTATTTACTTTTAGATTTAG  
AAATATTATTAACTTTCCCTTCGCTCTTAGTGAGTATGTTAATGGTATTTATGGTCTTTTAGTTAC  
TTTAATTTTTATAGCTATAATAACTATAGGATTTATATTTGAATTAGGTAAAAGCGCTCTTAAATA  
GACAGCAGACAAAAATTATATATACCTAAATTGAACGTTAATTACCATACAGAGTATGTTGGAAT  
AGGTAAGGTTTCTAAGTAAAGTTATAGAGGCAGAAAACCAAAAAACCTACCAAAGGGTAGCTA  
ATGGGAAGCTATTAATAAATAAAGATGATAACCTATATATAGTATAGTTACTATATATTTACTATA  
ACTAGGATTATTATATATATATATATTATCTTATTGTATATTAAGATTATTATTATAAGGTATA  
ATTAATATAGTATCTTATTGTATAAGAATATAATATATTAACCTATAATTAATTTTATTTTTTAATTT  
TTAATTATAATTTTTTTTTATATCTAGATGCTTACACATCTACAGATGTAGAAGAGAACAAAATAT  
TGTTGTTATAGTAGTGGATGATATAGAAAAATATTTTTATATTATTTATTTTGTAGGTAGCTTTT  
GAAGTGTGTTGATAGAGAGGATATATGGACGGTAGGAGGGTATTCATTTAATGAACAGTGGATA  
GTTTAAATTAACCTAGTTATAGTTTATGAATTTAAATTATAATTATATTAATGTAGGTTATGATAGA  
ATTATGTATTGATCCTTAAGAGTTAAGAGAGATACGCCACGTATAATACATATTGGTTTAGGGT  
TGAGTATATATACTTAAGAGTTAAGAATATATATATACAATATATAATAAATATAGTAATATATTA  
ATGGTATGGACTTAACCAGGTTTATATATTATCATTTGATAAACATTAATTATAATTTTTCTATTTA  
TTATTATTATTATACTGTGAGATTAATAATTATTAATAATATAATATTACATAGTACGTGATATTTGG  
GGATTTTATCTTATTAATTGGCAATTAATGATTCTAATCAAATTTTATTCTCTTAGTTAATGGTA  
GAACAATGATCTTCTAATTCATTGGTTTTAGTTTCGATTCTAAAAAGAGATGAGTAAATAATTTTCT  
AGATCAGAAATACTACTTTTAACTACAAAAGCTTACGCTTTTTAACATTTTTTTGATAAATAACA  
ACTATTGTTAATATTTGGCTGTCTATTGGTTTAACTAACAATTACAAAATTTTTCAATTTTTATAAT  
ATAAATTTAAATGAGAATATTAATAAAGTCATTATTATTAATAAATTAGTGAATCTTACCTTATCGA  
TGCGTCACAACCAAGTAACATTAGTTACTTGTGAAATTTTGGTTCATTATTAGCTGTTTGTAAAT  
AGTACAAATTATTACCGGTATTACATTAGCTATGCATTATAGTCCTAGTGTAATGGAAGCTTTTAA  
CTCAATAGAGCATATAATGAGAGATGTTAATAACGGGTGATTAGTTCGTTATCTACATAGTAATA  
CAGCTTCTGCTTTCTTTTCTTAGTGTATTTACACATAGGAAGAGGTATATATTACGGATCATATA

GAGCTCCTCGTACTTTAGTTTGAGCTATTGGTACTGTTATATTAATATTAATGATGGCTATCGGTT  
TCCTAGGTTATGTTTTACCTTATGGACAGATGTCATTATGAGGTGCTACAGTTATTACTAATCTTA  
TTAGTGCTATACCTGAATAGGGCAAGATATTGTTGAATTCATTTGAGGTGGTTTTCTGTAAATA  
ATGCCACTTTAAACAGATTTTTGCATTACATTTGTATTGCCTTTGTATTAGCTGCTTTAGTTTTA  
ATGCACTTAATTGCACTTCATGATACTGCTGGTTCAAGCAATCCTCTTGGTGTTCAGGTAATTAC  
GATAGAATTACATTTGCTCCATATTTTTATTTAAAGATTTAATTACTATTTTTATTTATTTTTGTA  
TTAAGTGCTTTTGTATTCTTTATGCCTAATGTTTTAGGGGATAGTGATAATTATATTATGGCTAATC  
CTATGCAAACCTCCTGCTGCTATTGTACCTGAATGATACTTATTACCTTTCTATGCTATTTAAGATC  
TATACCTAATAAATTATTAGGTGTTATAGCGATGTTTAGTGCTATTTTAGCTATTATGTTATTACCT  
GTTACAGATTTAGGTAGATCTAGAGGTTTACAATTTAGACCATTTAGTAAAATAGCTTTCTGAGTT  
TTTGTTGCTAATTTCTTAGTTTTAATGCAATTAGGTGCTAAACACGTTGAAGATCCATTTATATTAT  
TAGGTCAATTAAGTACTGTATTATACTTTAGTTATTTTGTGCTATATTACCTTTAGCTAGTTACTT  
AGATAATAGTTTAACTGATTTATCTAATAAATCTGAATTATTTTAAATAAAACTAACTAAATATAT  
TAAGATTATTATTTAATATATTTTCTATTTAAGATACTATTAATTTAGTATTTTGGGTTTTCAGTTTA  
TAATTTATATTATATTATGCATTACCCTCCACCTTGCTTTGTAGTAAGCTAATCTGTTATTTCTTTA  
GTTAATGGTAGAACAATGATCTTCTAATTCATTGGTTTTAGTTCGAATCTAAAAAGGAAATAAG  
AAATATATTCTTATTATTACTTATATAATAATTATTTCTTAAAAATATACATTTTGCATTATAGCCGT  
TTAGCTGTATTAATAATGTAAATGATATAAAATAGAATAAATATTTAAATTATTCCTATGTTATATT  
ATCCTATATTGCAACCATTATCAGAAGTTGTATTAATACTTGTACCTGCCTTATTAGCTGTAGCTT  
ATGTTACAGTTGCTGAAAGAAAAACTATGGCTAGTATGCAAAGAAGATTAGGTCCTAATGCTGT  
AGGTTACTATGGACTATTGCAAGCATTTGCTGATGCCTTAAACCTTTTATTTAAAGAATATGTAG  
CTCCTACACAATCTAATATTGTTCTTTTCTTTTAGGTCCTGTAATAACTTTAATTTTGCATTATTA  
GGTTACGCTGTTATACCCTATGGTCCTGGTTCAGGGATAAGCGACATGAATTTAGGTATATTTTA  
CATGTTAGCTGTGTCATCTTTAGCTACATACGGTATTCTATTAGCTGGTTGAAGTGCGAATAGTA  
AATACGCTTTTCTAGGTTCTCTTAGAAGTACAGCTCAATTAATTAGTTATGAATTAATATTAAGTT  
CAGCTATATTAATAGTAATTATGATAACAGGAAATTTAAATTTAACTGTTTGTACTGAATCTCAAA  
GAGCTATTTGATTTATACTACCTTTATTTCTGTGTTTATAATATTTTTCATAGGATCTATAGCTGA  
GACAAATAGAGCTCCTTTTGATTTAGCCGAGGCTAACCTGCTAATCTGGTTTGGTCTGGTTATAT  
GTCACAAATTGCTAGGAAACCTTTTTATTTAAAAACAAAAGACAATTAGCAGGAACTTAATTT  
AACCTAATTAATAATATTAGATAATTAACCTCTTCATAGACTAAACGTGACAATTTAATATATATA  
TATATTTATTTATATATATGATTAATAAGATATAGTCAATCATCGGTGTGAATCGACTTAAAAAA  
AAAAGCACATGGGTAAACCCATCTCCCCTTATTAGGGGAATCAGAACTTGTTAGTGGGTTTCAT  
GACAGAGCATGCTGCCGTAGTTTTCGTATTCTTCTTTTAGCTGAGTACGGTAGTATTGTACTAAT  
GTGTATTTTAACTAGTATATTATTTATTGGTGGTTACTTATTATTTGAAATATCCTATGTTTTACTG  
TGGTAAATTATATTTCTTTGAATTATTCTTTATAGACTGAGTAACATTTGTAGAGGTACAATCTTT  
ATACACTGATTTTTTAAATAATTCTATCATTGAAGGATTATTATATGGGTTTAACTAGGATTA  
AAGTTCTTTAATGATATTCACATTTATTTGAGCTAGAGCATCCTTCCCTAGAATACGATTTGATCA  
ACTAATGGGCTTCTGTTGAACAGTTTTATTACCTATTAATTTTGCAATTATTATATTAGTACCTTGT  
GTTTTATATAGTTTTAACTTATTACCTGTAAATATACCATTGTTCTAGCTCACACACCCGCCGCC  
CTACTGCCACAAGGCTACAGTACATATGAGGAGGGGAACTAAAGATCTAGAACTATCCTAGTTA  
ATAATTACACTTAATAGTATACTAAATAGACCATCTATCATACTCGAGAATAGTGATAGTGTAAT  
TATACACTATTTTAACTGTATTCTACACTATTAGCATATTATTATCTTTATATGATAATAATTTTATA  
ACTTAATTTATTAGGTTACATTAACAAAAAATTCGTTAACTTTTTTCACCACTTTTAAATACAAAAT  
ACGAATTTTA

>YN314

ATAACAATTCTAAAGAACATAAAGAGTTATTAGATAAAAAATAATTCACCTATACAGTTAATAAAT  
CAACTTAAAGGGTATTTTTTCATAAATCCTTTATTAGCTTTAAGTTTAGCTATTACTATTTCTCTTT  
TGCAGGTATTCCTCCTCTTGAGGGTCTTTGCTAAACAGATGGTATTAAGCGCGGCTATTGATC  
AAGGTTATATCTTTTTATCTTTAGTTGCAATATTAAGTGTATAGGAGGGGTTTATTATTTAAA  
TATAATTAAGAAATGTTCTTTTATTCACCTGACTATAAATTAACGAAGAAATTAATAAATAC  
TATTAATGGTCAAATTATTAATAGAAACAATAAAATATTAAATGTTGAATTAATTATACAAATGT  
AGTTATGTCTAGTTCTGTGGCAATAACTATTTCTACTATTACATTAGTAGTTTTATTATTCATGTTT  
ATGAATAAAGAATGATTAAGTCTGGGTACTATATTGGTACAATCTTTATTTAGCTATTAATGAGTA  
GTATGACATTATTTATAGGGTTTGTATCTGTTATAGCTATTTTATTTTAGCCATTAATTTATATTT  
GCTCCTCATAATCCTTATCAAGAAAAATATAGTATTTTCGAGTGTGGTTTCCATAGTTTTTTAGGG  
CAAAATAGAACACAATTCGGTATAAAATTCCTTTATTTTGTCTTAGTTTATTTACTTTTAGATTTAG  
AAATATTATTAACTTTCCCTTTCGCTCTTAGTGAGTATGTTAATGGTATTTATGGTCTTTTAGTTAC  
TTTAATTTTTATAGCTATAATAACTATAGGATTTATATTTGAATTAGGTAAAAGCGCTCTTAAATA  
GACAGCAGACAAAAATTATATATACCTAAATTGAACGTTAATTACCATACAGAGTATGTTGGAAT  
AGGTAAGGTTTCTAAGTAAAGTTATAGAGGCAGAAAACCAAAAACCTACCAAAGGGTAGCTA  
ATGGGAAGCTATTAATAAATAAAGATGATAACCTATATATAGTATAGTTACTATATATTTACTATA  
ACTAGGATTATTATATATATATATATTATCTTATTGTATATTAAGATTATTATTATAAGGTATA  
ATTAATATAGTATCTTATTGTATAAGAATATAATATATTAACCTATAATTAATTTATTTTTAATTT  
TTAATTATAATTTTTTTTTATATCTAGATGCTTACACATCTACAGATGTAGAAGAGAACAAAATAT  
TGTTGTTATAGTAGTGATATAGAAAAATATTTTTATATTATTTATTTTGTAGGTAGCTTTT  
GAAGTGTTTGATAGAGAGGATATATGGACGGTAGGAGGGTATTCATTTAATGAACAGTGGATA  
GTTTAAATTAACCTAGTTATAGTTTATGAATTTAAATTATAATTATATTAATGTAGGTTATGATAGA  
ATTATGTATTGATCCTTAAGAGTTAAGAGAGATACGCCACGTATAATACATATTGGTTTAGGGT  
TGAGTATATATACTTAAGAGTTAAGAATATATATATACAATATATAATAAATATAGTAATATATTA  
ATGGTATGGACTTAACCAGGTTTATATTATCATTGATAAACATTAATTATAATTTTTCTATTTA  
TTATTATTATTATACTGTGAGATTAATAATTATTAATAATATTACATAGTACGTGATATTTGG  
GGATTTTATCTTATTAATTGGCAATTAATGATTCTAATCAAATTTTATTCTCTTAGTTTAATGGTA  
GAACAATGATCTTCTAATTCATTGGTTTTAGTTGATTCTAAAAAGAGATGAGTAAATAATTTTCT  
AGATCAGAAATACTACTTTTAACTACAAAAGCTTACGCTTTTAAACATTTTTTGATAAATAACA  
ACTATTGTTAATATTTGGCTGTCTATTGGTTTAACTACAATTACAAAATTTTTCAATTTTTATAAT  
ATAAATTTAAATGAGAATATTAATAAAGTCATTCAATTATTAATAAATTAGTGAATTCTACCTTATCGA  
TGCCTCACAACCAAGTAACATTAGTTACTTGTGAAATTTTGGTTCATTATTAGCTGTTTGTAAAT  
AGTACAAATTATTACCGGTATTACATTAGCTATGCATTATAGTCCTAGTGAATGGAAGCTTTTAA  
CTCAATAGAGCATATAATGAGAGATGTTAATAACGGGTGATTAGTTCGTTATCTACATAGTAATA  
CAGCTTCTGCTTTCTTTTCTTAGTGATTTACACATAGGAAGAGGTATATATTACGGATCATATA  
GAGCTCCTCGTACTTTAGTTTGAGCTATTGGTACTGTTATATTAATTAATGATGGCTATCGGTT  
TCCTAGGTTATGTTTTACCTTATGGACAGATGTCATTATGAGGTGCTACAGTTATTACTAATCTTA  
TTAGTGCTATACCTGAATAGGGCAAGATATTGTTGAATTCATTTGAGGTGGTTTTTCTGTAAATA  
ATGCCACTTTAAACAGATTTTTTGCAATTACATTTGTATTGCCTTTTGTATTAGCTGCTTTAGTTTA  
ATGCACTTAATTGCACTTCATGATACTGCTGGTTCAAGCAATCCTCTTGGTGTTTCAGGTAATTAC  
GATAGAATTACATTTGCTCCATATTTTTATTTAAAGATTTAATTACTATTTTTATATTTATTTTGT  
TTAAGTGCTTTTGTATTCTTTATGCCTAATGTTTTAGGGGATAGTGATAATTATATTATGGCTAATC  
CTATGCAAACCTCCTGCTGCTATTGTACCTGAATGATACTTATTACCTTTCTATGCTATTTTAAGATC

TATACCTAATAAATTATTAGGTGTTATAGCGATGTTTAGTGCTATTTTAGCTATTATGTTATTACCT  
GTTACAGATTTAGGTAGATCTAGAGGTTTACAATTTAGACCATTTAGTAAAATAGCTTTCTGAGTT  
TTTGTTGCTAATTTCTTAGTTTTAAATGCAATTAGGTGCTAAACACGTTGAAGATCCATTTATATTAT  
TAGGTCAATTAAGTACTGTATTATACTTTAGTTATTTTGTGCTATATTACCTTTAGCTAGTTACTT  
AGATAATAGTTTAACTGATTTATCTAATAAATCTGAATTATTTTAAATAAACTAACTAAATATAT  
TAAGATTATTATTTAATATATTTTCTATTTAAGATACTATTAATTTAGTATTTTGGGTTTTAGTTTA  
TAATTTATATTATATTATGCATTACCCTCCACCTTGCTTTGTAGTAAGCTAATCTGTTATTTCTTTA  
GTTTAATGGTAGAACAATGATCTTCTAATTCATTGGTTTTAGTTCGAATCTAAAAAGGAAATAAG  
AAATATATTCTTATTATTACTTATATAATAATTATTTCTTAAAAATATACATTTTGCATTATAGCCGT  
TTAGCTGTATTAAATGTAAATGATATAAAATAGAATAAATATTTAAATTATTCCTATGTTATATT  
ATCCTATATTGCAACCATTATCAGAAGTTGTATTAATACTTGTACCTGCCTTATTAGCTGTAGCTT  
ATGTTACAGTTGCTGAAAGAAAACTATGGCTAGTATGCAAAGAAGATTAGGTCCTAATGCTGT  
AGGTTACTATGGACTATTGCAAGCATTTGCTGATGCCTTAAACTTTTTATTAAAGAATATGTAG  
CTCCTACACAATCTAATATTGTTCTTTTCTTTTAGGTCCTGTAATAACTTTAATTTTTGCATTATTA  
GGTTACGCTGTTATACCCTATGGTCCTGGTTCAGGGATAAGCGACATGAATTTAGGTATATTTTA  
CATGTTAGCTGTGTCATCTTTAGCTACATACGGTATTCTATTAGCTGGTTGAAGTGCGAATAGTA  
AATACGCTTTTCTAGGTTCTCTTAGAAGTACAGCTCAATTAATTAGTTATGAATTAATTAAGTT  
CAGCTATATTAATAGTAATTATGATAACAGGAAATTTAAATTTAACTGTTTGTACTGAATCTCAAA  
GAGCTATTTGATTTATACTACCTTTATTTCTGTGTTTATAATATTTTTCATAGGATCTATAGCTGA  
GACAAATAGAGCTCCTTTTGATTTAGCCGAGGCTAACCTGCTAATCTGGTTTGGTCTGGTTATAT  
GTCACAAATTGCTAGGAAACCTTTTTATTTTAAAAACAAAAGACAATTAGCAGGAACTTAATTT  
AACCTAATTAATAATATTAGATAATTAACTCTTCATAGACTAAACGTGACAATTTAATATATATA  
TATATTTATTTATATATATGATTAAATAAGATATAGTCAATCATCGGTGTGAATCGACTTAAAAAA  
AAAAGCACATGGGTAAACCCATCTCCCCTTATTAGGGGAATCAGAACTTGTTAGTGGGTTTCAT  
GACAGAGCATGCTGCCGTAGTTTTCGTATTCTTCTTTTAGCTGAGTACGGTAGTATTGTACTAAT  
GTGTATTTTAACTAGTATATTATTTATTGGTGGTTACTTATTATTTGAAATATCCTATGTTTTACTG  
TGGTAAATTATATTTTCTTTGAATTATTCTTTATAGACTGAGTAACATTTGTAGAGGTACAATCTTT  
ATACACTGATTTTTTAAATAATTCTATCATTGAAGGATTATTATATGGGTTTAACTAGGATTAAA  
AAGTTCTTTAATGATATTCACATTTATTTGAGCTAGAGCATCCTTCCCTAGAATACGATTTGATCA  
ACTAATGGGCTTCTGTTGAACAGTTTTATTACCTATTAATTTGCAATTATTATATTAGTACCTTGT  
GTTTTATATAGTTTTAACTTATTACCTGTAAATATACCATTGTTCTAGCTCACACACCCGCCGCC  
CTACTGCCACAAGGCTACAGTACATATGAGGAGGGGAATAAGATCTAGAACTATCCTAGTTA  
ATAATTACACTTAATAGTATACTAAATAGACCATCTATCATACTCGAGAATAGTGATAGTGTAAT  
TATACACTATTTTAACTGTATTCTACACTATTAGCATATTATTATCTTTATATGATAATAATTTTATA  
ACTTAATTTATTAGGTTACATTAACAAAAAATTCGTTAACTTTTTTACCACCTTTTAAATACAAAAAT  
ACGAATTATA

>YN352

ATAACAATTCTAAAGAACATAAAGAGTTATTAGATAAAAAATAATTCACCTATACAGTTAATAAAT  
CAACTTAAAGGGTATTTTTTCATAAATCCTTTATTAGCTTTAAGTTTAGCTATTACTATTTTCTCTTT  
TGCAGGTATTCCTCCTCTGTAGGGTTCTTTGCTAAACAGATGGTATTAAGCGCGGCTATTGATC  
AAGGTTATATCTTTTATCTTTAGTTGCAATATTAAGTGTATAGGAGGGGTTTATTATTTAAA  
TATAATTAAGAAATGTTCTTTTATTCACCTGACTATAAATTAACGAAGAAATTAATAAATAATAC  
TATTAATGGTCAAATTATTAATAGAAACAATAAAATATTAATGTTGAATTTAATTATACAAATGT  
AGTTATGTCTAGTTCTGTGGCAATAACTATTTCTACTATTACATTAGTAGTTTTATTATTCATGTTT

ATGAATAAAGAATGATTAAGTCTGGGTACTATATTGGTACAATCTTTATTTAGCTATTAATGAGTA  
GTATGACATTATTTATAGGGTTTGTATCTGTTATAGCTATTTTATTTTATAGCCATTAATTTTATATTT  
GCTCCTCATAATCCTTATCAAGAAAAATATAGTATTTTCGAGTGTGGTTTCCATAGTTTTTATAGG  
CAAAATAGAACACAATTCGGTATAAAATTCCTTATTTTTCGTTTAGTTTATTTACTTTTATAGATTTAG  
AAATATTATTAACCTTTCCCTTTTCGCTCTTAGTGAGTATGTTAATGGTATTTATGGTCTTTTATGTTAC  
TTTAATTTTATAGCTATAATAACTATAGGATTTATATTTGAATTAGGTAAAAGCGCTCTTAAAATA  
GACAGCAGACAAAAATTATATATACCTAAATTGAACGTTAATTACCATACAGAGTATGTTGGAAT  
AGGTAAGGTTTCTAAGTAAAGTTATAGAGGCAGAAAACCAAAAAACCTACCAAAGGGTAGCTA  
ATGGGAAGCTATTAATAAATAAAGATGATAACCTATATATAGTATAGTTACTATATATTTACTATA  
ACTAGGATTATTATATATATATATATTATCTTATTGTATATTAAGATTATTATTATTATAAGGTATA  
ATTAATATAGTATCTTATTGTATAAGAATATAATATATTAACCTATAATTAATTTTATTTTAAATTT  
TTAATTATAATTTTTTTTTTATATCTAGATGCTTACACATCTACAGATGTAGAAGAGAACAAAATAT  
TGTTGTTATAGTAGTGGATGATATAGAAAAATATTTTATATTATTTATTTTGTAGGTAGCTTTT  
GAAGTGTGATAGAGAGGATATATGGACGGTAGGAGGGTATTCATTTTAATGAACAGTGGATA  
GTTTAAATTAACCTAGTTATAGTTTATGAATTTAAATTATAATTATATTAATGTAGGTATGATAGA  
ATTATGTATTGATCCTTAAGAGTTAAGAGAGATACGCCACGTATAATACATATTGGTTTAGGGT  
TGAGTATATATACTTAAGAGTTAAGAATATATATATACAATATATAATAAATATAGTAATATATTA  
ATGGTATGGACTTAACCAGGTTTATATATTATCATTTGATAAACATTAATTATAATTTTCTATTTA  
TTATTATTATTACTGTGAGATTAATAATTATTAATAATATAATTACATAGTACGTGATATTTGG  
GGATTTTATCTTATTAATTGGCAATTAATGATTCTAATCAAATTTTATTCTCTTTAGTTTAAATGGTA  
GAACAATGATCTTCTAATTCATTGGTTTTAGTTTCGATTCTAAAAAGAGATGAGTAAATAATTTTCT  
AGATCAGAAATACTACTTTTAACTACAAAAAGCTTACGCTTTTAAACATTTTTTTGATAAATAACA  
ACTATTGTTAATATTTGGCTGTCTATTGGTTTAACTACAATTACAAAATTTTTCAATTTTATAAT  
ATAAATTTAAATGAGAATATTAATAAAGTCATTCAATTATTAATAATTAGTGAATTCTTACCTTATCGA  
TGCGTCACAACCAAGTAACATTAGTTACTTGTGAAATTTTGGTTCATTATTAGCTGTTTGTTAAT  
AGTACAAATTATTACCGGTATTACATTAGCTATGCATTATAGTCCTAGTGTAATGGAAGCTTTTAA  
CTCAATAGAGCATATAATGAGAGATGTTAATAACGGGTGATTAGTTCGTTATCTACATAGTAATA  
CAGCTTCTGCTTTCTTTTCTTAGTGATTACACATAGGAAGAGGTATATATTACGGATCATATA  
GAGCTCCTCGTACTTTAGTTTGAGCTATTGGTACTGTTATATTAATTAATGATGGCTATCGGT  
TCCTAGGTATGTTTTACCTTATGGACAGATGTCATTATGAGGTGCTACAGTTATTACTAATCTTA  
TTAGTGCTATACCTGAATAGGGCAAGATATTGTTGAATTCATTTGAGGTGGTTTTCTGTAAATA  
ATGCCACTTTAAACAGATTTTTGCATTACATTTGTATTGCCTTTTGTATTAGCTGCTTTAGTTTA  
ATGCACTTAATTGCACTTCATGATACTGCTGGTTCAAGCAATCCTCTTGGTGTTTCAGGTAATTAC  
GATAGAATTACATTTGCTCCATATTTTTATTTAAAGATTTAATTACTATTTTATATTTATTTTGT  
TTAAGTGCTTTTGTATTCTTTATGCCTAATGTTTTAGGGGATAGTGATAATTATATTATGGCTAATC  
CTATGCAAACCTCCTGCTGCTATTGTACCTGAATGATACTTATTACCTTCTATGCTATTTTAAGATC  
TATACCTAATAAATTATTAGGTGTTATAGCGATGTTTAGTGCTATTTTAGCTATTATGTTATTACCT  
GTTACAGATTTAGGTAGATCTAGAGGTTTACAATTTAGACCATTTAGTAAATAGCTTTCTGAGTT  
TTTGTTGCTAATTTCTTAGTTTTAATGCAATTAGGTGCTAAACACGTTGAAGATCCATTTATATTAT  
TAGGTCAATTAAGTACTGTATTATACTTTAGTTATTTTGTGCTATATTACCTTTAGCTAGTTACTT  
AGATAATAGTTTAACTGATTTATCTAATAAATCTGAATTATTTTAAATAAACTAACTAAATATAT  
TAAGATTATTATTTAATATATTTTCTATTTAAGATACTATTAATTTAGTATTTTGGGTTTTAGTTTA  
TAATTTATATTATATTATGCATTACCTCCACCTTGCTTTGTAGTAAGCTAATCTGTTATTTCTTTA  
GTTAATGGTAGAACAATGATCTTCTAATTCATTGGTTTTAGTTTGAATCTAAAAAGGAAATAAG

AAATATATTCTTATTATTACTTATATAATAATTATTTCTTAAAAATATACATTTTGCATTATAGCCGT  
TTAGCTGTATTAAAATGTAAAATGATATAAAATAGAATAAAATATTTAAATTATTCCTATGTTATATT  
ATCCTATATTGCAACCATTATCAGAAGTTGTATTAATACTTGTACCTGCCTTATTAGCTGTAGCTT  
ATGTTACAGTTGCTGAAAGAAAACTATGGCTAGTATGCAAAGAAGATTAGGTCCTAATGCTGT  
AGGTTACTATGGACTATTGCAAGCATTTGCTGATGCCTTAAAACTTTTATTAAGAATATGTAG  
CTCCTACACAATCTAATATTGTTCTTTTCTTTTAGGTCCTGTAATAACTTTAATTTTGCATTATTA  
GGTTACGCTGTTATACCCTATGGTCCTGGTTCAGGGATAAGCGACATGAATTTAGGTATATTTTA  
CATGTTAGCTGTGTCATCTTTAGCTACATACGGTATTCTATTAGCTGGTTGAAGTGCGAATAGTA  
AATACGCTTTTCTAGGTTCTCTTAGAAGTACAGCTCAATTAATTAGTTATGAATTAATATTAAGTT  
CAGCTATATTAATAGTAATTATGATAACAGGAAATTTAAATTTAACTGTTTGTACTGAATCTCAAA  
GAGCTATTTGATTTATACTACCTTTATTTCTGTGTTTATAATATTTTTCATAGGATCTATAGCTGA  
GACAAATAGAGCTCCTTTGATTTAGCCGAGGCTAACCTGCTAATCTGGTTTGGTCTGGTTATAT  
GTCACAAATTGCTAGGAAACCTTTTTATTTAAAAACAAAAGACAATTAGCAGGAAACTTAATTT  
AACCTAATTAATAATTAGATAATTAACCTCTCATAGACTAAACGTGACAATTTAATATATATA  
TATATTTATTTATATATATGATTAATAAGATATAGTCAATCATCGGTGTGAATCGACTTAAAAAA  
AAAAGCACATGGGTAAACCCATCTCCCTTATTAGGGGAATCAGAACTTGTTAGTGGGTTTCAT  
GACAGAGCATGCTGCCGTAGTTTTCGTATTCTTCTTTTAGCTGAGTACGGTAGTATTGTACTAAT  
GTGTATTTTAACTAGTATATTATTTATTGGTGGTTACTTATTATTTGAAATATCCTATGTTTTACTG  
TGGTAAATTATATTTTCTTTGAATTATTCTTTATAGACTGAGTAACATTTGTAGAGGTACAATCTTT  
ATACACTGATTTTTTAAATAATTCTATCATTGAAGGATTATTATATGGGTTTAACTAGGATTA  
AAGTTCTTTAATGATATTCACATTTATTTGAGCTAGAGCATCCTTCCCTAGAATACGATTTGATCA  
ACTAATGGGCTTCTGTTGAACAGTTTTATTACCTATTAATTTTGAATTATTATATTAGTACCTTGT  
GTTTTATATAGTTTTAACTTATTACCTGTAAATATACCATTGTTCTAGCTCACACACCCGCCGCC  
CTACTGCCACAAGGCTACAGTACATATGAGGAGGGGAATAAGATCTAGAATACTATCCTAGTTA  
ATAATTACACTTAATAGTATACTAAATAGACCATCTATCATACTCGAGAATAGTGATAGTGTAAT  
TATACACTATTTTAACTGTATTCTACACTATTAGCATATTATTATCTTTATATGATAATAATTTTATA  
ACTTAATTTATTAGGTTACATTAACAAAAAATTCGTTAACTTTTTTACCACCTTTTAAATACAAAAT  
ACGAATTTTA

>YN355

ATAACAATTCTAAAGAACATAAAGAGTTATTAGATAAAAAATAATTCACCTATACAGTTAATAAAT  
CAACTTAAAGGGTATTTTTTCATAAATCCTTATTAGCTTTAAGTTTAGCTATTACTATTTTCTCTTT  
TGCAGGTATTCTCCTCTTGTAGGGTTCTTTGCTAAACAGATGGTATTAAGCGCGGCTATTGATC  
AAGGTTATATCTTTTATCTTTAGTTGCAATATTAAGTGTATAGGAGGGGTTTATTATTTAAA  
TATAATTAAGAAATGTTCTTTTATTCACCTGACTATAAATTAACGAAGAAATTAATAATAC  
TATTAATGGTCAAATTATTAATAGAAACAATAAAATATTAATGTTGAATTTAATTATACAAATGT  
AGTTATGTCTAGTTCTGTGGCAATAACTATTTCTACTATTACATTAGTAGTTTTATTATTCATGTTT  
ATGAATAAAGAATGATTAAGTCTGGGTACTATATTGGTACAATCTTTATTTAGCTATTAATGAGTA  
GTATGACATTATTTATAGGGTTGTATCTGTTATAGCTATTTTATTTTAGCCATTAATTTATATTT  
GCTCCTCATAATCCTTATCAAGAAAAATATAGTATTTTCGAGTGTGGTTTCCATAGTTTTTTAGGG  
CAAAATAGAACACAATTCGGTATAAAATCCTTATTTTGTCTTAGTTTATTTACTTTTAGATTTAG  
AAATATTATTAACTTTCCCTTTCGCTCTTAGTGAGTATGTTAATGGTATTTATGGTCTTTTAGTTAC  
TTTAATTTTATAGCTATAATAACTATAGGATTTATATTTGAATTAGGTAAAAGCGCTCTTAAATA  
GACAGCAGACAAAATTATATATACCTAAATTGAACGTTAATTACCATACAGAGTATGTTGGAAT  
AGGTAAGGTTTCTAAGTAAAGTTATAGAGGCAGAAAACCAAAAAACCTACCAAGGGTAGCTA

ATGGGAAGCTATTA AAAAATAAAAGATGATAACCTATATATAGTATAGTTACTATATATTTACTATA  
ACTAGGATTATTATATATATATATATTATCTTATTGTATATTAAGATTATTATTATAAGGTATA  
ATTAATATAGTATCTTATTGTATAAGAATATAATATATTAACCTATAATTAATTTTATTTTTAATTT  
TTAATTATAATTTTTTTTTTATATCTAGATGCTTACACATCTACAGATGTAGAAGAGAACAAAATAT  
TGTTGTTATAGTAGTGGATGATATAGAAAAATATTTTTATATTATTTATTTTTGTTAGGTAGCTTTT  
GAAGTGTGGATAGAGAGGATATATGGACGGTAGGAGGGTATTCATTTTAATGAACAGTGGATA  
GTTTAAATTAACCTAGTTATAGTTTATGAATTTAAATTATAATTATATTAATGTAGGTTATGATAGA  
ATTATGTATTGATCCTTAAGAGTTAAGAGAGATACGCCACGTATAATACATATTGGTTTAGGGT  
TGAGTATATATACTTAAGAGTTAAGAATATATATATACAATATATAATAAATATAGTAATATATTA  
ATGGTATGGACTTAACCAGGTTTATATATTATCATTTGATAAACATTAATTATAATTTTTCTATTTA  
TTATTATTATTACTGTGAGATTAATAATTATTA AAAATATAATATTACATAGTACGTGATATTTGG  
GGATTTTATCTTATTAATTGGCAATTAATGATTCTAATCAAATTTTATTCTCTTTAGTTTAATGGTA  
GAACAATGATCTTCTAATTCATTGGTTTTAGTTTCGATTCTAAAAAGAGATGAGTAAATAATTTTCT  
AGATCAGAAATACTACTTTTAACTACAAAAAGCTTACGCTTTTAAACATTTTTTTGATAAATAACA  
ACTATTGTTAATATTTGGCTGTCTATTGGTTTAACTAACAATTACAAAATTTTTCAATTTTTATAAT  
ATAAATTTAAATGAGAATATTA AAAAGTCATTCATTATTA AAATTAGTGAATTCCTACCTTATCGA  
TGCGTCACAACCAAGTAACATTAGTTACTTGTGAAATTTTGGTTCATTATTAGCTGTTTGTTAAT  
AGTACAAATTATTACCGGTATTACATTAGCTATGCATTATAGTCCTAGTGAATGGAAGCTTTTAA  
CTCAATAGAGCATATAATGAGAGATGTTAATAACGGGTGATTAGTTCGTTATCTACATAGTAATA  
CAGCTTCTGCTTTCTTTTTCTTAGTGTATTTACACATAGGAAGAGGTATATATTACGGATCATATA  
GAGCTCCTCGTACTTTAGTTTGAGCTATTGGTACTGTTATATTAATTAATGATGGCTATCGGTT  
TCCTAGGTTATGTTTTACCTTATGGACAGATGTCATTATGAGGTGCTACAGTTATTACTAATCTTA  
TTAGTGCTATACCTGAATAGGGCAAGATATTGTTGAATTCATTTGAGGTGGTTTTCTGTTAATA  
ATGCCACTTTAAACAGATTTTTTGCAATTACATTTGTATTGCCTTTTGTATTAGCTGCTTTAGTTTAA  
ATGCACTTAATTGCACTTCATGATACTGCTGGTTCAAGCAATCCTCTGGTGTTTCAGGTAATTAC  
GATAGAATTACATTTGCTCCATATTTTTATTTAAAGATTTAATTACTATTTTTATATTTATTTTTGTA  
TTAAGTGCTTTTGTATTCTTTATGCCTAATGTTTTAGGGGATAGTGATAATTATATTATGGCTAATC  
CTATGCCAACTCCTGCTGCTATTGTACCTGAATGATACTTATTACCTTTCTATGCTATTTTAAAGATC  
TATACCTAATAAATTATTAGGTGTTATAGCGATGTTTAGTGCTATTTTAGCTATTATGTTATTACCT  
GTTACAGATTTAGGTAGATCTAGAGGTTTACAATTTAGACCATTTAGTAAATAGCTTTCTGAGTT  
TTTGTTGCTAATTTCTTAGTTTAAATGCAATTAGGTGCTAAACACGTTGAAGATCCATTTATATTAT  
TAGGTCAATTAAGTACTGTATTATACTTTAGTTATTTTGTGCTATATTACCTTTAGCTAGTTACTT  
AGATAATAGTTTAACTGATTTATCTAATAAATCTGAATTATTTTAAATAAACTAACTAAATATAT  
TAAGATTATTATTTAATATATTTTCTATTTAAGATACTATTAATTTAGTATTTTGGGTTTTCAGTTTA  
TAATTTATATTATATTATGCATTACCCTCCACCTTGCTTTGTAGTAAGCTAATCTGTTATTTCTTTA  
GTTTAATGGTAGAACAATGATCTTCTAATTCATTGGTTTTAGTTTGAATCTAAAAAGGAAATAAG  
AAATATATTCTTATTATTACTTATATAATAATTATTTCTTAAAAATATACATTTTGCATTATAGCCGT  
TTAGCTGTATTAAATGTAAATGATATAAAATAGAATAAATATTTAAATTATTCCTATGTTATATT  
ATCCTATATTGCAACCATTATCAGAAGTTGTATTAATACTTGTACCTGCCTTATTAGCTGTAGCTT  
ATGTTACAGTTGCTGAAAGAAAACTATGGCTAGTATGCAAAGAAGATTAGGTCCTAATGCTGT  
AGGTTACTATGGACTATTGCAAGCATTTGCTGATGCCTTAAACTTTTATTAAGAATATGTAG  
CTCCTACACAATCTAATATTGTTCTTTTCTTTTAGGTCCTGTAATAACTTTAATTTTTGCATTATTA  
GGTTACGCTGTTATACCCTATGGTCCTGGTTCAGGGATAAGCGACATGAATTTAGGTATATTTTA  
CATGTTAGCTGTGTCATCTTTAGCTACATACGGTATTCTATTAGCTGGTTGAAGTGCGAATAGTA

AATACGCTTTTCTAGGTTCTCTTAGAAGTACAGCTCAATTAATTAGTTATGAATTAATATTAAGTT  
CAGCTATATTAATAGTAATTATGATAACAGGAAATTTAAATTTAACTGTTTGTACTGAATCTCAAA  
GAGCTATTTGATTTATACTACCTTTATTTCCCTGTGTTTATAATATTTTTCATAGGATCTATAGCTGA  
GACAAATAGAGCTCCTTTTGATTTAGCCGAGGCTAACCTGCTAATCTGGTTTGGTCTGGTTATAT  
GTCACAAATTGCTAGGAAACCTTTTTATTTTAAAAACAAAAGACAATTAGCAGGAACTTAATTT  
AACCTAATTAATAATATTAGATAATTAACTCTTCATAGACTAAACGTGACAATTTAATATATATA  
TATATTTATTTATATATATGATTAAATAAGATATAGTCAATCATCGGTGTGAATCGACTTAAAAAA  
AAAAGCACATGGGTAAACCCATCTCCCCTTATTAGGGGAATCAGAACTTGTTAGTGGGTTTCAT  
GACAGAGCATGCTGCCGTAGTTTTCGTATTCTTCTTTTGTAGCTGAGTACGGTAGTATTGTACTAAT  
GTGTATTTTAACTAGTATATTATTTATTGGTGGTTACTTATTATTTGAAATATCCTATGTTTTTACTG  
TGGTAAATTATATTTTCTTTGAATTATTCTTTATAGACTGAGTAACATTTGTAGAGGTACAATCTTT  
ATACACTGATTTTTTAAATAATTCTATCATTGAAGGATTATTATATGGGTTTAACTAGGATTA  
AAGTTCTTTAATGATATTCACATTTATTTGAGCTAGAGCATCCTTCCCTAGAATACGATTTGATCA  
ACTAATGGGCTTCTGTTGAACAGTTTTATTACCTATTAATTTTGCAATTATTATATTAGTACCTTGT  
GTTTTATATAGTTTTAACTTATTACCTGTAAATATACCATTGTTCTAGCTCACACACCCGCCGCC  
CTACTGCCACAAGGCTACAGTACATATGAGGAGGGGAATAAGATCTAGAATACTATCCTAGTTA  
ATAATTACACTTAATAGTATACTAAATAGACCATCTATCATACTCGAGAATAGTGATAGTGTAAT  
TATACACTATTTTAACTGTATTCTACACTATTAGCATATTATTATCTTTATATGATAATAATTTTATA  
ACTTAATTTATTAGGTTACATTAACAAAAAATTCGTTAACTTTTTTCACCACTTTTTAATACAAAAT  
ACGAATTTTA

>YN358

ATAACAATTCTAAAGAACATAAAGAGTTATTAGATAAAAAATAATTCACCTATACAGTTAATAAAT  
CAACTTAAAGGGTATTTTTTCATAAATCCTTTATTAGCTTTAAGTTTAGCTATTACTATTTTCTCTTT  
TGCAGGTATTCCTCCTCTTGAGGGTCTTTGCTAAACAGATGGTATTAAGCGCGGCTATTGATC  
AAGGTTATATCTTTTTATCTTTAGTTGCAATATTAAGTGTATAGGAGGGGTTTATTATTTAAA  
TATAATTAAGAAATGTTCTTTTATTCACCTGACTATAAATTAACGAAGAAATTAATAAATAC  
TATTAATGGTCAAATTATTAATAGAAACAATAAAATATTAATGTTGAATTTAATTATACAAATGT  
AGTTATGTCTAGTTCTGTGGCAATAACTATTTCTACTATTACATTAGTAGTTTTATTATTCATGTTT  
ATGAATAAAGAATGATTAAGTCTGGGTACTATATTGGTACAATCTTTATTTAGCTATTAATGAGTA  
GTATGACATTATTTATAGGGTTGTATCTGTTATAGCTATTTTATTTTGTAGCCATTAATTTATATTT  
GCTCCTCATAATCCTTATCAAGAAAAATATAGTATTTTCGAGTGTGGTTTCCATAGTTTTTTAGGG  
CAAAATAGAACACAATTCGGTATAAAATTCCTTTATTTTGTCTTAGTTTATTTACTTTTAGATTTAG  
AAATATTATTAACTTTCCCTTTTCGCTCTTAGTGAGTATGTTAATGGTATTTATGGTCTTTTAGTTAC  
TTTAATTTTTTATAGCTATAATAACTATAGGATTTATATTTGAATTAGGTAAAAGCGCTCTTAAATA  
GACAGCAGACAAAAATTATATATACCTAAATTGAACGTTAATTACCATACAGAGTATGTTGGAAT  
AGGTAAGGTTTCTAAGTAAAGTTATAGAGGCAGAAAACCAAAAAACCTACCAAAGGGTAGCTA  
ATGGGAAGCTATTAATAAATAAAGATGATAACCTATATATAGTATAGTTACTATATATTTACTATA  
ACTAGGATTATTATATATATATATATTATCTTATTGTATATTAAGATTATTATTATAAGGTATA  
ATTAATATAGTATCTTATTGTATAAGAATATAATATATTAACCTATAATTAATTTTATTTTTAATTT  
TTAATTATAATTTTTTTTTATATCTAGATGCTTACACATCTACAGATGTAGAAGAGAACAAAATAT  
TGTTGTTATAGTAGTGATATAGAAAAATATTTTTATATTATTTATTTTGTAGGTAGCTTTT  
GAAGTGTTGATAGAGAGGATATATGGACGGTAGGAGGGTATTCATTTTAATGAACAGTGGATA  
GTTTAAATTAACCTAGTTATAGTTTATGAATTTAAATTATAATTATTAATGTAGGTTATGATAGA  
ATTATGTATTGATCCTTAAGAGTTAAGAGAGATACGCCACGTATAATACATATTGGTTTAGGGT

TGAGTATATATACTTAAGAGTTAAGAATATATATATACAATATATAATAAATATAGTAATATATTA  
ATGGTATGGACTTAACCAGGTTTATATATTATCATTTGATAAACATTAATTATAATTTTTCTATTTA  
TTATTATTATTACTGTGAGATTAATAATTATTAATAATATTACATAGTACGTGATATTTGG  
GGATTTTATCTTATTAATTGGCAATTAATGATTCTAATCAAATTTTATTCTCTTTAGTTTAAATGGTA  
GAACAATGATCTTCTAATTCATTGGTTTTAGTTCGATTCTAAAAAGAGATGAGTAAATAATTTTCT  
AGATCAGAAATACTACTTTTAACTACAAAAAGCTTACGCTTTTTAACATTTTTTGATAAATAACA  
ACTATTGTTAATATTTGGCTGTCTATTGGTTTAACTAACAATTACAAAATTTTTCAATTTTTATAAT  
ATAAATTTAAATGAGAATATTAATAAGTCATTATTATTAATAATTAGTGAATTCTTACCTTATCGA  
TGCGTCACAACCAAGTAACATTAGTTACTTGTGAAATTTTGGTTCATTATTAGCTGTTTGTTAAT  
AGTACAAATTATTACCGGTATTACATTAGCTATGCATTATAGTCCTAGTGAATGGAAGCTTTTAA  
CTCAATAGAGCATATAATGAGAGATGTTAATAACGGGTGATTAGTTCGTTATCTACATAGTAATA  
CAGCTTCTGCTTTCTTTTTCTTAGTGTATTTACACATAGGAAGAGGTATATATTACGGATCATATA  
GAGCTCCTCGTACTTTAGTTTGAGCTATTGGTACTGTTATTAATTAATGATGGCTATCGGTT  
TCCTAGGTTATGTTTTACCTTATGGACAGATGTCATTATGAGGTGCTACAGTTATTACTAATCTTA  
TTAGTGCTATACCTGAATAGGGCAAGATATTGTTGAATTCATTGAGGTGGTTTTCTGTTAATA  
ATGCCACTTTAAACAGATTTTTGCATTACATTTGTATTGCCTTTGTATTAGCTGCTTAGTTTTA  
ATGCACTTAATTGCACTTCATGATACTGCTGGTTCAAGCAATCCTCTTGGTGTTTCAGGTAATTAC  
GATAGAATTACATTTGCTCCATATTTTTATTTAAAGATTTAATTACTATTTTTATTTATTTTTGTA  
TTAAGTGCTTTTGATTCTTTATGCCTAATGTTTTAGGGGATAGTGATAATTATATTATGGCTAATC  
CTATGCCAACTCCTGCTGCTATTGTACCTGAATGATACTTATTACCTTTCTATGCTATTTAAGATC  
TATACCTAATAAATTATTAGGTGTTATAGCGATGTTTAGTGCTATTTAGCTATTATGTTATTACCT  
GTTACAGATTTAGGTAGATCTAGAGGTTTACAATTTAGACCATTTAGTAAATAGCTTTCTGAGTT  
TTTGTTGCTAATTTCTTAGTTTTAATGCAATTAGGTGCTAAACACGTTGAAGATCCATTATATTAT  
TAGGTCAATTAAGTACTGTATTATACTTTAGTTATTTTTGTTGCTATATTACCTTTAGCTAGTTACTT  
AGATAATAGTTTAACTGATTTATCTAATAAATCTGAATTATTTTAAATAAACTAACTAAATATAT  
TAAGATTATTATTTAATATATTTTCTATTTAAGATACTATTAATTTAGTATTTTGGGTTTTAGTTTA  
TAATTTATATTATATTATGCATTACCCTCCACCTTGCTTTGTAGTAAGCTAATCTGTTATTTCTTTA  
GTTTAATGGTAGAACAATGATCTTCTAATTCATTGGTTTTAGTTCGAATCTAAAAAGGAAATAAG  
AAATATATTCTTATTATTACTTATATAATAATTATTTCTTAAAAATATACATTTTGCATTATAGCCGT  
TTAGCTGTATTAAATGTAAATGATATAAAATAGAATAAATATTTAAATTATTCCTATGTTATATT  
ATCCTATATTGCAACCATTATCAGAAGTTGATTAATACTTGTACCTGCCTTATTAGCTGTAGCTT  
ATGTTACAGTTGCTGAAAGAAAACTATGGCTAGTATGCAAAGAAGATTAGGTCCTAATGCTGT  
AGGTTACTATGGACTATTGCAAGCATTTGCTGATGCCTTAAACTTTTTATTAAGAATATGTAG  
CTCCTACACAATCTAATATTGTTCTTTTCTTTTAGGTCCTGTAATAACTTTAATTTTTGCATTATTA  
GGTTACGCTGTTATACCCTATGGTCCTGGTTCAGGGATAAGCGACATGAATTTAGGTATATTTTA  
CATGTTAGCTGTGTCATCTTTAGCTACATACGGTATTCTATTAGCTGGTTGAAGTGCGAATAGTA  
AATACGCTTTTCTAGGTTCTCTTAGAAGTACAGCTCAATTAATTAGTTATGAATTAATTAAGTT  
CAGCTATATTAATAGTAATTATGATAACAGGAAATTTAAATTTAACTGTTTGTACTGAATCTCAAA  
GAGCTATTTGATTTATACTACCTTTATTTCTGTGTTTATAATTTTTTCATAGGATCTATAGCTGA  
GACAAATAGAGCTCCTTTTGATTTAGCCGAGGCTAACCTGCTAATCTGGTTTGGTCTGGTTATAT  
GTCACAAATTGCTAGGAAACCTTTTTATTTAAAAACAAAAGACAATTAGCAGGAACTTAATTT  
AACCTAATTAATAATATTAGATAATTAACTCTTCATAGACTAAACGTGACAATTTAATATATATA  
TATATTTATTTATATATATGATTAAATAAGATATAGTCAATCATCGGTGTGAATCGACTTAAAAAA  
AAAAGCACATGGGTAAACCCATCTCCCCTTATTAGGGGAATCAGAACTTGTTAGTGGGTTTAT

GACAGAGCATGCTGCCGTAGTTTTCGTATTCTTCTTTTAGCTGAGTACGGTAGTATTGTACTAAT  
GTGTATTTAACTAGTATATTATTTATTGGTGGTTACTTATTATTTGAAATATCCTATGTTTTACTG  
TGGTAAATTATATTTTCTTTGAATTATTCTTTATAGACTGAGTAACATTTGTAGAGGTACAATCTTT  
ATACACTGATTTTTTAAATAATTCTATCATTGAAGGATTATTATATGGGTTTAATCTAGGATTAAA  
AAGTTCTTTAATGATATTCACATTTATTTGAGCTAGAGCATCCTTCCCTAGAATACGATTTGATCA  
ACTAATGGGCTTCTGTTGAACAGTTTTATTACCTATTAATTTTGCAATTATTATATTAGTACCTTGT  
GTTTTATATAGTTTTAACTTATTACCTGTAAATATACCATTGTTCTAGCTCACACACCCGCCGCC  
CTACTGCCACAAGGCTACAGTACATATGAGGAGGGGAATAAGATCTAGAATACTCTAGTTA  
ATAATTACACTTAATAGTATACTAAATAGACCATCTATCATACTCGAGAATAGTGATAGTGTAAT  
TATACACTATTTTAACTGTATTCTACACTATTAGCATATTATTATCTTTATATGATAATAATTTATA  
ACTTAATTTATTAGGTTACATTAACAAAAAATTCGTTAACTTTTTTCACCACTTTTAAATACAAAAT  
ACGAATTTTA

>YN359

ATAACAATTCTAAAGAACATAAAGAGTTATTAGATAAAAAATAATTCACCTATACAGTTAATAAAT  
CAACTTAAAGGGTATTTTTTCATAAATCCTTTATTAGCTTTAAGTTTAGCTATTACTATTTTCTCTTT  
TGCAGGTATTCCTCCTCTGTAGGGTCTTTGCTAAACAGATGGTATTAAGCGCGGCTATTGATC  
AAGGTTATATCTTTTTATCTTTAGTTGCAATATTAAGTGTATAGGAGGGGTTTATTATTTAAA  
TATAATTAAGAAATGTTCTTTTATTCACCTGACTATAAATTAACGAAGAAATTAATAAATAC  
TATTAATGGTCAAATTATTAATAGAAACAATAAAATATTAAATGTTGAATTTAATTATACAAATGT  
AGTTATGTCTAGTTCTGTGGCAATAACTATTTCTACTATTACATTAGTAGTTTTATTATTCATGTTT  
ATGAATAAAGAATGATTAAGTCTGGGTACTATATTGGTACAATCTTTATTTAGCTATTAATGAGTA  
GTATGACATTATTTATAGGGTTTGTATCTGTTATAGCTATTTTATTTTAGCCATTAATTTATATTT  
GCTCCTCATAATCCTTATCAAGAAAAATATAGTATTTTCGAGTGTGGTTTCCATAGTTTTTAGGG  
CAAAATAGAACACAATTCGGTATAAAATCTTTATTTTTGCTTTAGTTTATTTACTTTTAGATTTAG  
AAATATTATTAACTTTCCCTTTCGCTCTTAGTGAGTATGTTAATGGTATTTATGGTCTTTTAGTTAC  
TTTAATTTTATAGCTATAATAACTATAGGATTTATATTTGAATTAGGTAAAAGCGCTCTTAAATA  
GACAGCAGACAAAAATTATATATACCTAAATTGAACGTTAATTACCATACAGAGTATGTTGGAAT  
AGGTAAGGTTTCTAAGTAAAGTTATAGAGGCAGAAAACCAAAAAACCTACCAAAGGGTAGCTA  
ATGGGAAGCTATTAATAAATAAAGATGATAACCTATATATAGTATAGTTACTATATATTTACTATA  
ACTAGGATTATTATATATATATATATTATCTTATTGTATATTAAGATTATTATTATAAGGTATA  
ATTAATATAGTATCTTATTGTATAAGAATATAATATATTAACCTATAATTAATTTTATTTTAAATTT  
TTAATTATAATTTTTTTTTATATCTAGATGCTTACACATCTACAGATGTAGAAGAGAACAAAATAT  
TGTTGTTATAGTAGTGGATGATATAGAAAAATATTTTTATATTATTTATTTTGTAGGTAGCTTTT  
GAAGTGTGATAGAGAGGATATATGGACGGTAGGAGGGTATTCATTTTAATGAACAGTGGATA  
GTTTAAATTAACCTAGTTATAGTTTATGAATTTAAATTATAATTATATTAATGTAGGTATGATAGA  
ATTATGTATTGATCCTTAAGAGTTAAGAGAGATACGCCACGTATAATACATATTGGTTTAGGGT  
TGAGTATATATACTTAAGAGTTAAGAATATATATATACAATATATAATAAATATAGTAATATATTA  
ATGGTATGGACTTAACCAGGTTTATATATTATCATTTGATAAACATTAATTATAATTTTCTATTTA  
TTATTATTATTACTGTGAGATTAATAATTATTAATAATATTACATAGTACGTGATATTTGG  
GGATTTTATCTTATTAATTGGCAATTAATGATTCTAATCAAATTTTATTCTCTTTAGTTTAAATGGTA  
GAACAATGATCTTCTAATTCATTGGTTTTAGTTTCGATTCTAAAAAGAGATGAGTAAATAATTTTCT  
AGATCAGAAATACTACTTTTAACTACAAAAAGCTTACGCTTTTTAACATTTTTTTGATAAATAACA  
ACTATTGTTAATATTTGGCTGTCTATTGGTTTAACTACAATTACAAAATTTTTCAATTTTATAAT  
ATAAATTTAAATGAGAATATTAATAAAGTCATTCAATTATTAATAATTAGTGAATCTTACCTTATCGA

TGCGTCACAACCAAGTAACATTAGTTACTTGTGAAATTTTGGTTCATTATTAGCTGTTTGTTAAT  
AGTACAAATTATTACCGGTATTACATTAGCTATGCATTATAGTCCTAGTGTAATGGAAGCTTTTAA  
CTCAATAGAGCATATAATGAGAGATGTTAATAACGGGTGATTAGTTCGTTATCTACATAGTAATA  
CAGCTTCTGCTTTCTTTTCTTAGTGATTTACACATAGGAAGAGGTATATATTACGGATCATATA  
GAGCTCCTCGTACTTTAGTTTGAGCTATTGGTACTGTTATATTAATTAATGATGGCTATCGGT  
TCCTAGGTTATGTTTACCTTATGGACAGATGTCATTATGAGGTGCTACAGTTACTAATCTTA  
TTAGTGCTATACCTGAATAGGGCAAGATATTGTTGAATTCATTTGAGGTGGTTTTCTGTTAATA  
ATGCCACTTTAAACAGATTTTTGCATTACATTTGTATTGCCTTTGTATTAGCTGCTTAGTTTTA  
ATGCACTTAATTGCACTTCATGATACTGCTGGTTCAAGCAATCCTCTGGTGTTTCAGGTAATTAC  
GATAGAATTACATTTGCTCCATATTTTTATTTAAAGATTTAATTACTATTTTTATATTTATTTTGT  
TTAAGTGCTTTGTATTCTTTATGCCTAATGTTTAGGGGATAGTGATAATTATATTATGGCTAATC  
CTATGCAAACCTCCTGCTGCTATTGTACCTGAATGATACTTATTACCTTTCTATGCTATTTAAGATC  
TATACCTAATAAATTATTAGGTGTTATAGCGATGTTTAGTGCTATTTAGCTATTATGTTATTACCT  
GTTACAGATTTAGGTAGATCTAGAGGTTTACAATTTAGACCATTTAGTAAATAGCTTTCTGAGTT  
TTTGTTGCTAATTTCTTAGTTTTAATGCAATTAGGTGCTAAACACGTTGAAGATCCATTTATATTAT  
TAGGTCAATTAAGTACTGTATTATACTTTAGTTATTTTGTTGCTATATTACCTTTAGCTAGTTACTT  
AGATAATAGTTTAACTGATTTATCTAATAAATCTGAATTATTTTAAATAAAACTAACTAAATATAT  
TAAGATTATTATTTAATATATTTTCTATTTAAGATACTATTAATTTAGTATTTTGGGTTTTAGTTTA  
TAATTTATATTATATTATGCATTACCCTCCACCTTGCTTTGTAGTAAGCTAATCTGTTATTTCTTTA  
GTTTAATGGTAGAACAATGATCTTCTAATTCATTGGTTTTAGTTTGAATCTAAAAAGGAAATAAG  
AAATATATTCTTATTATTACTTATATAATAATTATTTCTTAAAAATATACATTTTGCAATTATAGCCGT  
TTAGCTGTATTAAATGTAAATGATATAAAATAGAATAAATATTTAAATTATTCCTATGTTATATT  
ATCCTATATTGCAACCATTATCAGAAGTTGTATTAATACTTGTACCTGCCTTATTAGCTGTAGCTT  
ATGTTACAGTTGCTGAAAGAAAACTATGGCTAGTATGCAAAGAAGATTAGGTCCTAATGCTGT  
AGGTTACTATGGACTATTGCAAGCATTGCTGATGCCTTAAACTTTTATTTAAAGAATATGTAG  
CTCCTACACAATCTAATATTGTTCTTTTCTTTTAGGTCTGTAAATAACTTTAATTTTGCAATTATTA  
GGTTACGCTGTTATACCCTATGGTCCTGGTTCAGGGATAAGCGACATGAATTTAGGTATATTTTA  
CATGTTAGCTGTGTCATCTTTAGCTACATACGGTATTCTATTAGCTGGTTGAAGTGCGAATAGTA  
AATACGCTTTTCTAGGTTCTCTTAGAAGTACAGCTCAATTAATTAGTTATGAATTAATATTAAGTT  
CAGCTATATTAATAGTAATTATGATAACAGGAAATTTAAATTTAACTGTTTGACTGAATCTCAAA  
GAGCTATTTGATTTATACTACCTTTATTTCTGTGTTTATAATATTTTTCATAGGATCTATAGCTGA  
GACAAATAGAGCTCCTTTGATTTAGCCGAGGCTAACCTGCTAATCTGGTTTGGTCTGGTTATAT  
GTCACAAATTGCTAGGAAACCTTTTTATTTAAAAACAAAAGACAATTAGCAGGAAACTTAATTT  
AACCTAATTAATAAATTATTAGATAAATAAATCTTTCATAGACTAAACGTGACAATTTAATATATATA  
TATATTTATTTATATATATGATTAATAAGATATAGTCAATCATCGGTGTGAATCGACTTAAAAAA  
AAAAGCACATGGGTAAACCCATCTCCCCTTATTAGGGGAATCAGAACTTGTTAGTGGGTTTCAT  
GACAGAGCATGCTGCCGTAGTTTTCGTATTCTTCTTTTAGCTGAGTACGGTAGTATTGTACTAAT  
GTGTATTTTAACTAGTATATTATTTATTGGTGGTTACTTATTATTTGAAATATCCTATGTTTTACTG  
TGGTAAATTATATTTTCTTTGAATTATCTTTATAGACTGAGTAACATTTGTAGAGGTACAATCTTT  
ATACACTGATTTTTTAAATAATTCTATCATTGAAGGATTATTATATGGGTTAATCTAGGATTAAA  
AAGTTCTTTAATGATATTCACATTTATTTGAGCTAGAGCATCCTTCCCTAGAATACGATTTGATCA  
ACTAATGGGCTTCTGTTGAACAGTTTTATTACCTATTAATTTTGCAATTATTATATTAGTACCTTGT  
GTTTTATATAGTTTTAACTTATTACCTGTAAATATACCATTGTTCTAGCTCACACACCCGCCGCC  
CTACTGCCACAAGGCTACAGTACATATGAGGAGGGGAAGTAAAGATCTAGAAGTATCCTAGTTA

ATAATTACACTTAATAGTATACTAAATAGACCATCTATCATACTCGAGAATAGTGATAGTGTAAT  
TATACACTATTTTAACTGTATTCTACACTATTAGCATATTATTATCTTTATATGATAATAATTTTATA  
ACTTAATTTATTAGGTTACATTAACAAAAAATTCGTTAACTTTTTTCACCACTTTTAAACAAAAAT  
ACGAATTTTA

>YN365

ATAACAATTCTAAAGAACATAAAGAGTTATTAGATAAAAAATAATTCACCTATACAGTTAATAAAT  
CAACTTAAAGGGTATTTTTTCATAAATCCTTTATTAGCTTTAAGTTTAGCTATTACTATTTTCTCTTT  
TGCAGGTATTCCTCCTCTGTAGGGTTCTTTGCTAAACAGATGGTATTAAGCGCGGCTATTGATC  
AAGGTTATATCTTTTTATCTTTAGTTGCAATATTAAGTGTATAGGAGGGGTTTATTATTTAAA  
TATAATTAAGAAATGTTCTTTTATTCACCTGACTATAAATTAACGAAGAAATTAATAAATAC  
TATTAATGGTCAAATTATTAATAGAAACAATAAATATTAATGTTGAATTTAATTATACAAATGT  
AGTTATGTCTAGTTCTGTGGCAATAACTATTTCTACTATTACATTAGTAGTTTTATTATTCATGTTT  
ATGAATAAAGAATGATTAAGTCTGGGTACTATATTGGTACAATCTTTATTTAGCTATTAATGAGTA  
GTATGACATTATTTATAGGGTTTGTATCTGTTATAGCTATTTTATTTTAGCCATTAATTTTATATTT  
GCTCCTCATAATCCTTATCAAGAAAAATATAGTATTTTCGAGTGTGGTTTCCATAGTTTTTTAGGG  
CAAAATAGAACACAATTCGGTATAAAATCCTTATTTTGTCTTAGTTTATTTACTTTTAGATTTAG  
AAATATTATTAACTTTCCCTTTCGCTCTTAGTGAGTATGTTAATGGTATTTATGGTCTTTTAGTTAC  
TTTAATTTTATAGCTATAATAACTATAGGATTTATATTTGAATTAGGTAAAAGCGCTCTTAAATA  
GACAGCAGACAAAAATTATATATACCTAAATTGAACGTTAATTACCATACAGAGTATGTTGGAAT  
AGGTAAGGTTTCTAAGTAAAGTTATAGAGGCAGAAAACCAAAAAACCTACCAAAGGGTAGCTA  
ATGGGAAGCTATTAATAAAGATGATAACCTATATATAGTATAGTTACTATATATTTACTATA  
ACTAGGATTATTATATATATATATTATCTTATTGTATATTAAGATTATTATTATTATAAGGTATA  
ATTAATATAGTATCTTATTGTATAAGAATATAATATATTAACCTATAATTAATTTTATTTTAAATTT  
TTAATTATAATTTTTTTTTTATATCTAGATGCTTACACATCTACAGATGTAGAAGAGAACAAAATAT  
TGTTGTTATAGTAGTGGATGATATAGAAAAATATTTTTATATTATTTATTTTGTAGGTAGCTTTT  
GAAGTGTTTGATAGAGAGGATATATGGACGGTAGGAGGGTATTCATTTTAATGAACAGTGGATA  
GTTTAAATTAACCTAGTTATAGTTTATGAATTTAAATTATAATTATATTAATGTAGGTTATGATAGA  
ATTATGTATTGATCCTTAAGAGTTAAGAGAGATACGCCACGTATAATACATATTGGTTTAGGGT  
TGAGTATATATACTTAAGAGTTAAGAATATATATATACAATATATAATAAATATAGTAATATATTA  
ATGGTATGGACTTAACCAGGTTTATATATTATCATTGATAAACATTAATTATAATTTTCTATTTA  
TTATTATTATTACTGTGAGATTAATAATTATTAATAATATTACATAGTACGTGATATTTGG  
GGATTTTATCTTATTAATTGGCAATTAATGATTCTAATCAAATTTTATTCTCTTTAGTTTAATGGTA  
GAACAATGATCTTCTAATTCATTGGTTTTAGTTTCGATTCTAAAAAGAGATGAGTAAATAATTTTCT  
AGATCAGAAATACTACTTTTAACTACAAAAAGCTTACGCTTTTAAACATTTTTTGTAAATAACA  
ACTATTGTTAATATTTGGCTGTCTATTGGTTTAACTAACAATTACAAAATTTTTCAATTTTTATAAT  
ATAAATTTAAATGAGAATATTAAAAAGTCATTATTAAAAATTAGTGAATTCTTACCTTATCGA  
TGCCTCACAACCAAGTAACATTAGTTACTTGTGAAATTTTGGTTCATTATTAGCTGTTTGTAAAT  
AGTACAAATTATTACCGGTATTACATTAGCTATGCATTATAGTCCTAGTGAATGGAAGCTTTTAA  
CTCAATAGAGCATATAATGAGAGATGTTAATAACGGGTGATTAGTTCGTTATCTACATAGTAATA  
CAGCTTCTGCTTTCTTTTCTTAGTGTATTTACACATAGGAAGAGGTATATATTACGGATCATATA  
GAGCTCCTCGTACTTTAGTTTGAGCTATTGGTACTGTTATATTAATTAATGATGGCTATCGGTT  
TCCTAGGTTATGTTTTACCTTATGGACAGATGTCATTATGAGGTGCTACAGTTATTACTAATCTTA  
TTAGTGCTATACCTGAATAGGGCAAGATATTGTTGAATTCATTTGAGGTGGTTTTCTGTAAATA  
ATGCCACTTAAACAGATTTTTTGCATTACATTTGTATTGCCTTTGTATTAGCTGCTTTAGTTTAA

ATGCACTTAATTGCACTTCATGATACTGCTGGTTCAAGCAATCCTCTTGGTGTTTCAGGTAATTAC  
GATAGAATTACATTTGCTCCATATTTTTATTTAAAGATTTAATTACTATTTTTATATTTATTTTTGTA  
TTAAGTGCTTTTGATTCTTTATGCCTAATGTTTTAGGGGATAGTGATAATTATATTATGGCTAATC  
CTATGCAAACCTCCTGCTGCTATTGTACCTGAATGATACTTATTACCTTTCTATGCTATTTTAAGATC  
TATACCTAATAAATTATTAGGTGTTATAGCGATGTTTAGTGCTATTTTAGCTATTATGTTATTACCT  
GTTACAGATTTAGGTAGATCTAGAGGTTTACAATTTAGACCATTTAGTAAAATAGCTTTCTGAGTT  
TTTGTTGCTAATTTCTTAGTTTTAATGCAATTAGGTGCTAAACACGTTGAAGATCCATTTATATTAT  
TAGGTCAATTAAGTACTGTATTATACTTTAGTTATTTTTGTTGCTATATTACCTTTAGCTAGTACTT  
AGATAATAGTTTAACTGATTTATCTAATAAATCTGAATTATTTTTAAATAAACTAACTAAATATAT  
TAAGATTATTATTTAATATATTTTCTATTTAAGATACTATTAATTTAGTATTTTGGGTTTTAGTTTA  
TAATTTATATTATATTATGCATTACCCTCCACCTTGCTTTGTAGTAAGCTAATCTGTTATTTCTTTA  
GTTTAATGGTAGAACAATGATCTTCTAATTCATTGGTTTTAGTTTGAATCTAAAAAGGAAATAAG  
AAATATATTCTTATTACTTATATAATAATTATTTCTTAAAAATATACATTTTGCAATTATAGCCGT  
TTAGCTGTATTAATAATGTAAATGATATAAAATAGAATAAATATTTAAATTATTCCTATGTTATATT  
ATCCTATATTGCAACCATTATCAGAAGTTGTATTAATACTTGTACCTGCCTTATTAGCTGTAGCTT  
ATGTTACAGTTGCTGAAAGAAAACTATGGCTAGTATGCAAAGAAGATTAGGTCCTAATGCTGT  
AGGTTACTATGGACTATTGCAAGCATTTGCTGATGCCTTAAACCTTTTATTAAGAATATGTAG  
CTCCTACACAATCTAATATTGTTCTTTTCTTTTAGGTCCTGTAATAACTTTAATTTTGCATTATTA  
GGTTACGCTGTTATACCCTATGGTCCTGGTTCAGGGATAAGCGACATGAATTTAGGTATATTTTA  
CATGTTAGCTGTGTCATCTTTAGCTACATACGGTATTCTATTAGCTGGTTGAAGTGCGAATAGTA  
AATACGCTTTTCTAGGTTCTCTTAGAAGTACAGCTCAATTAATTAGTTATGAATTAATTAAGTT  
CAGCTATATTAATAGTAATTATGATAACAGGAAATTTAAATTTAACTGTTTGTACTGAATCTCAAA  
GAGCTATTTGATTTATACTACCTTTATTTCTGTGTTTATAATATTTTTCATAGGATCTATAGCTGA  
GACAAATAGAGCTCCTTTTGATTTAGCCGAGGCTAACCTGCTAATCTGGTTTGGTCTGGTTATAT  
GTCACAAATTGCTAGGAAACCTTTTTATTTAAAAACAAAAGACAATTAGCAGGAACTTAATTT  
AACCTAATTAATAATTAGATAAATAAATCTTTCATAGACTAAACGTGACAATTTAATATATATA  
TATATTTATTTATATATATGATTAATAAGATATAGTCAATCATCGGTGTGAATCGACTTAAAAAA  
AAAAGCACATGGGTAAACCCATCTCCCCTTATTAGGGGAATCAGAACTTGTTAGTGGGTTTCAT  
GACAGAGCATGCTGCCGTAGTTTTCGTATTCTTCTTTTATAGCTGAGTACGGTAGTATTGTACTAAT  
GTGTATTTTAACTAGTATATTATTTATTGGTGGTTACTTATTATTTGAAATATCCTATGTTTTTACTG  
TGGTAAATTATATTTTCTTTGAATTATTCTTTATAGACTGAGTAACATTTGTAGAGGTACAATCTTT  
ATACACTGATTTTTTAAATAATTCTATCATTGAAGGATTATTATATGGGTTTAACTAGGATTA  
AAGTTCTTTAATGATATTCACATTTATTTGAGCTAGAGCATCCTTCCCTAGAATACGATTTGATCA  
ACTAATGGGCTTCTGTTGAACAGTTTTATTACCTATTAATTTTGAATTATTATATTAGTACCTTGT  
GTTTTATATAGTTTTAACTTATTACCTGTAAATATACCATTGTTCTAGCTCACACACCCGCCGCC  
CTACTGCCACAAGGCTACAGTACATATGAGGAGGGGAATAAGATCTAGAACTATCCTAGTTA  
ATAATTACACTTAATAGTATACTAAATAGACCATCTATCATACTCGAGAATAGTGATAGTGTAAT  
TATACACTATTTTAACTGTATTCTACACTATTAGCATATTATTATCTTTATATGATAATAATTTTATA  
ACTTAATTTATTAGGTTACATTAACAAAAAATTCGTTAACTTTTTTACCACCTTTTAAATACAAAAT  
ACGAATTTTA

>YN376

ATAACAATTCTAAAGAACATAAAGAGTTATTAGATAAAAAATAATTCACCTATACAGTTAATAAAT  
CAACTTAAAGGTATTTTTTCATAAATCCTTTATTAGCTTTAAGTTTAGCTATTACTATTTTCTCTTT  
TGCAGGTATTCCTCCTCTTGTAGGGTTCTTTGCTAAACAGATGGTATTAAGCGCGGCTATTGATC

AAGGTTATATCTTTTTATCTTTAGTTGCAATATTAAGTGTATAGGAGGGGTTTATTATTTAAA  
TATAATTAAGAAATGTTCTTTTATTCACCTGACTATAAATTAACGAAGAAATTAATAATAC  
TATTAATGGTCAAATTATTAAGAAACAATAAAATATTAATGTTGAATTTAATTATACAAATGT  
AGTTATGTCTAGTTCTGTGGCAATAACTATTTCTACTATTACATTAGTAGTTTTATTATTCATGTTT  
ATGAATAAAGAATGATTAAGTCTGGGTACTATATTGGTACAATCTTTATTTAGCTATTAATGAGTA  
GTATGACATTATTTATAGGGTTTGTATCTGTTATAGCTATTTTATTTTAGCCATTAATTTTATATTT  
GCTCCTCATAATCCTTATCAAGAAAAATATAGTATTTTCGAGTGTGGTTTCCATAGTTTTTTAGGG  
CAAAATAGAACACAATTCGGTATAAAATCTTTATTTTGCTTTAGTTTATTTACTTTTAGATTTAG  
AAATATTATTAACCTTCCCTTCGCTCTTAGTGAGTATGTTAATGGTATTTATGGTCTTTTAGTTAC  
TTTAATTTTATAGCTATAATAACTATAGGATTTATATTTGAATTAGGTAAGCGCTCTTAAATA  
GACAGCAGACAAAAATTATATACCTAAATTGAACGTTAATTACCATACAGAGTATGTTGGAAT  
AGGTAAGGTTTCTAAGTAAAGTTATAGAGGCAGAAAACCAAAAAACCTACCAAAGGGTAGCTA  
ATGGGAAGCTATTAATAAAAGATGATAACCTATATATAGTATAGTTACTATATATTTACTATA  
ACTAGGATTATTATATATATATATATTATCTTATTGTATATTAAGATTATTATTATTATAAGGTATA  
ATTAATATAGTATCTTATTGTATAAGAATATAATATATTAACCTATAATTAATTTTATTTTAAATTT  
TTAATTATAATTTTTTTTATATCTAGATGCTTACACATCTACAGATGTAGAAGAGAACAAAATAT  
TGTTGTTATAGTAGTGGATGATATAGAAAAATATTTTATATTATTTATTTTGTAGGTAGCTTTT  
GAAGTGTGATAGAGAGGATATATGGACGGTAGGAGGTATTCATTTAATGAACAGTGGATA  
GTTTAAATTAACCTAGTTATAGTTTATGAATTTAAATTATAATTATATTAATGTAGGTTATGATAGA  
ATTATGTATTGATCCTTAAGAGTTAAGAGAGATACGCCACGTATAATACATATTGGTTTAGGGT  
TGAGTATATATACTTAAGAGTTAAGAATATATATACAATATATAATAAATATAGTAATATATTA  
ATGGTATGGACTTAACCAGGTTTATATATTATCATTTGATAAACATTAATTATAATTTTCTATTTA  
TTATTATTATACTGTGAGATTAATAATTATTAATAATATTACATAGTACGTGATATTTGG  
GGATTTTATCTTATTAATTGGCAATTAATGATTCTAATCAAATTTTATTCTCTTTAGTTTAAATGGTA  
GAACAATGATCTTCTAATTCATTGGTTTTAGTTGATTCTAAAAAGAGATGAGTAAATAATTTTCT  
AGATCAGAAATACTACTTTTAACTACAAAAGCTTACGCTTTTAAACATTTTTTGATAAATAACA  
ACTATTGTTAATATTTGGCTGTCTATTGGTTTAACTAACAATTACAAAATTTTTCAATTTTTATAAT  
ATAAATTTAAATGAGAATATTAATAAGTCATTATTATTAATAATAGTGAATCTTACCTTATCGA  
TGCGTCACAACCAAGTAACATTAGTTACTTGTGAAATTTTGGTTCATTATTAGCTGTTTGTTAAT  
AGTACAAATTATTACCGGTATTACATTAGCTATGCATTATAGTCCTAGTGAATGGAAGCTTTTAA  
CTCAATAGAGCATATAATGAGAGATGTTAATAACGGGTGATTAGTTCGTTATCTACATAGTAATA  
CAGCTTCTGCTTCTTTTCTTAGTGTATTTACACATAGGAAGAGGTATATATTACGGATCATATA  
GAGCTCCTCGTACTTTAGTTGAGCTATTGGTACTGTTATATTAATATTAATGATGGCTATCGGTT  
TCCTAGGTTATGTTTTACCTTATGGACAGATGTCATTATGAGGTGCTACAGTTATTACTAATCTTA  
TTAGTGCTATACCTGAATAGGGCAAGATATTGTTGAATTCATTTGAGGTGGTTTTCTGTTAATA  
ATGCCACTTTAAACAGATTTTTGCATTACATTTGTATTGCCTTTGTATTAGCTGCTTAGTTTA  
ATGCACTTAATTGCACTTCATGATACTGCTGGTTCAAGCAATCCTCTTGGTGTTCAGGTAATTAC  
GATAGAATTACATTTGCTCCATATTTTTATTTAAAGATTTAATTACTATTTTATATTTATTTTGT  
TTAAGTGCTTTTGTATTCTTTATGCCTAATGTTTTAGGGGATAGTGATAATTATATTATGGCTAATC  
CTATGCAAACCTCCTGCTGCTATTGTACCTGAATGATACTTATTACCTTTCTATGCTATTTTAAAGATC  
TATACCTAATAAATTATTAGGTGTTATAGCGATGTTTAGTGCTATTTAGCTATTATGTTATTACCT  
GTTACAGATTTAGGTAGATCTAGAGGTTTACAATTTAGACCATTTAGTAAATAGCTTTCTGAGTT  
TTTGTTGCTAATTTCTTAGTTTAAATGCAATTAGGTGCTAAACACGTTGAAGATCCATTTATATTAT  
TAGGTCAATTAAGTACTGTATTATACTTTAGTTATTTTGTGCTATATTACCTTTAGCTAGTTACTT

AGATAATAGTTTAACTGATTTATCTAATAAATCTGAATTATTTTTAAATAAACTAACTAAATATAT  
TAAGATTATTATTTAATATATTTTCTATTTAAGATACTATTAATTTAGTATTTTGGGTTTTTCAGTTTA  
TAATTTATATTATATTATGCATTACCTCCACCTTGCTTTGTAGTAAGCTAATCTGTTATTTCCCTTA  
GTTTAATGGTAGAACAATGATCTTCTAATTCATTGGTTTTAGTTCGAATCTAAAAAGGAAATAAG  
AAATATATTCTTATTATTACTTATATAATAATTATTTCTTAAAAATATACATTTTGCATTATAGCCGT  
TTAGCTGTATTAAATGTAAATGATATAAAATAGAATAAATATTTAAATTATTCCTATGTTATATT  
ATCCTATATTGCAACCATTATCAGAAAGTTGTATTAATACTTGTACCTGCCTTATTAGCTGTAGCTT  
ATGTTACAGTTGCTGAAAGAAAACTATGGCTAGTATGCAAAGAAGATTAGGTCCTAATGCTGT  
AGGTTACTATGGACTATTGCAAGCATTGCTGATGCCTTAAACTTTTTATTTAAAGAATATGTAG  
CTCCTACACAATCTAATATTGTTCTTTTCTTTTAGGTCCTGTAATAACTTTAATTTTTGCATTATTA  
GGTTACGCTGTTATACCCTATGGTCCTGGTTCAGGGATAAGCGACATGAATTTAGGTATATTTTA  
CATGTTAGCTGTGTCATCTTTAGCTACATACGGTATTCTATTAGCTGGTTGAAGTGCGAATAGTA  
AATACGCTTTTCTAGGTTCTCTTAGAAGTACAGCTCAATTAATTAGTTATGAATTAATTAAGTT  
CAGCTATATTAATAGTAATTATGATAACAGGAAATTTAAATTTAACTGTTTGTACTGAATCTCAAA  
GAGCTATTTGATTTATACTACCTTTATTTCTGTGTTTATAATTTTTTCATAGGATCTATAGCTGA  
GACAAATAGAGCTCCTTTTGATTTAGCCGAGGCTAACCTGCTAATCTGGTTTGGTCTGGTTATAT  
GTCACAAATTGCTAGGAAACCTTTTTATTTAAAAACAAAAGACAATTAGCAGGAAACTTAATTT  
AACCTAATTTAAATATTAGATAATTAACTCTTCATAGACTAAACGTGACAATTTAATATATATA  
TATATTTATTTATATATATGATTAAATAAGATATAGTCAATCATCGGTGTGAATCGACTTAAAAAA  
AAAAGCACATGGGTAAACCCATCTCCCCTTATTAGGGGAATCAGAACTTGTTAGTGGGTTTCAT  
GACAGAGCATGCTGCCGTAGTTTTCGTATTCTTCTTTTAGCTGAGTACGGTAGTATTGTACTAAT  
GTGTATTTTAACTAGTATATTATTTATTGGTGGTTACTTATTATTTGAAATATCCTATGTTTTTACTG  
TGGTAAATTATATTTTCTTTGAATTATTCTTTATAGACTGAGTAACATTTGTAGAGGTACAATCTTT  
ATACACTGATTTTTTAAATAATTCTATCATTGAAGGATTATTATATGGGTTTAACTAGGATTAAA  
AAGTTCTTTAATGATATTCACATTTATTTGAGCTAGAGCATCCTTCCCTAGAATACGATTTGATCA  
ACTAATGGGCTTCTGTTGAACAGTTTTATTACCTATTAATTTTGCAATTATTATATTAGTACCTTGT  
GTTTTATATAGTTTTAACTTATTACCTGTAAATATACCATTGTTCTAGCTCACACACCCGCCGCC  
CTACTGCCACAAGGCTACAGTACATATGAGGAGGGGAACTAAAGATCTAGAACTATCCTAGTTA  
ATAATTACACTTAATAGTATACTAAATAGACCATCTATCATACTCGAGAATAGTGATAGTGAAT  
TATACACTATTTTAACTGTATTCTACACTATTAGCATATTATTATCTTTATATGATAATAATTTATA  
ACTTAATTTATTAGGTTACATTAACAAAAAATTCGTTAACTTTTTTCACCACTTTTAAATACAAAAT  
ACGAATTTTA

>YN390

ATAACAATTCTAAAGAACATAAAGAGTTATTAGATAAAAAATAATTCACCTATACAGTTAATAAAT  
CAACTTAAAGGGTATTTTTTCATAAATCCTTTATTAGCTTTAAGTTTAGCTATTACTATTTCTCTTT  
TGCAGGTATTCCTCCTCTTGTAGGGTTCTTGCTAAACAGATGGTATTAAGCGCGGCTATTGATC  
AAGGTTATATCTTTTTATCTTTAGTTGCAATATTAAGTGTATAGGAGGGGTTTATTATTTAAA  
TATAATTAAGAAATGTTCTTTTATTCACCTGACTATAAATTAAACGAAGAAATTAATAAATAC  
TATTAATGGTCAAATTATTAATAGAAACAATAAAATATTAAATGTTGAATTTAATTATACAAATGT  
AGTTATGTCTAGTTCTGTGGCAATAACTATTTCTACTATTACATTAGTAGTTTTATTATTCATGTTT  
ATGAATAAAGAATGATTAAGTCTGGGTACTATATTGGTACAATCTTTATTTAGCTATTAATGAGTA  
GTATGACATTATTTATAGGGTTTGTATCTGTTATAGCTATTTTATTTTAGCCATTAATTTATATTT  
GCTCCTCATAATCCTTATCAAGAAAAATATAGTATTTTCGAGTGTGGTTTCCATAGTTTTTATAGG  
CAAAATAGAACACAATTCGGTATAAAATCTTTATTTTGTCTTAGTTTATTTACTTTTAGATTTAG

AAATATTATTAACTTTCCCTTTTCGCTCTTAGTGAGTATGTTAATGGTATTTATGGTCTTTTAGTTAC  
TTTAATTTTTATAGCTATAATAACTATAGGATTTATATTTGAATTAGGTAAAAGCGCTCTTAAAATA  
GACAGCAGACAAAAATTATATATACCTAAATTGAACGTTAATTACCATACAGAGTATGTTGGAAT  
AGGTAAGGTTTCTAAGTAAAGTTATAGAGGCAGAAAACCAAAAAACCTACCAAAGGGTAGCTA  
ATGGGAAGCTATTAATAAATAAAGATGATAACCTATATATAGTATAGTTACTATATATTTACTATA  
ACTAGGATTATTATATATATATATATTATCTTATTGTATATTAAGATTATTATTATAAGGTATA  
ATTAATATAGTATCTTATTGTATAAGAATATAATATATTAACCTATAATTAATTTTATTTTTTAATTT  
TTAATTATAATTTTTTTTTTATATCTAGATGCTTACACATCTACAGATGTAGAAGAGAACAAAATAT  
TGTTGTTATAGTAGTGGATGATATAGAAAAATTTTTTATATTATTTATTTTTGTTAGGTAGCTTTT  
GAAGTGTTTGATAGAGAGGATATATGGACGGTAGGAGGGTATTCATTTTAATGAACAGTGGATA  
GTTTAAATTAACCTAGTTATAGTTTATGAATTTAAATTATAATTATATTAATGTAGGTTATGATAGA  
ATTATGTATTGATCCTTAAGAGTTAAGAGAGATACGCCCACGTATAATACATATTGGTTTAGGGT  
TGAGTATATATACTTAAGAGTTAAGAATATATATATACAATATATAATAAATATAGTAATATATTA  
ATGGTATGGACTTAACCAGGTTTATATATTATCATTTGATAAACATTAATTATAATTTTTCTATTTA  
TTATTATTATTATACTGTGAGATTAATAATTATTAATAATATAATATTACATAGTACGTGATATTTGG  
GGATTTTATCTTATTAATTGGCAATTAATGATTCTAATCAAATTTTATTCTCTTTAGTTTAATGGTA  
GAACAATGATCTTCTAATTCATTGGTTTTAGTTTCGATTCTAAAAAGAGATGAGTAAATAATTTTCT  
AGATCAGAAATACTACTTTTAACTACAAAAGCTTACGCTTTTTAACATTTTTTTGATAAATAACA  
ACTATTGTTAATATTTGGCTGTCTATTGGTTTAACTAACAATTACAAAATTTTTTCAATTTTTATAAT  
ATAAATTTAAATGAGAATATTAATAAAGTCATTCAATTATTAATAATTAGTGAATTCTTACCTTATCGA  
TGCGTCACAACCAAGTAACATTAGTTACTTGTGAAATTTTGGTTCATTATTAGCTGTTTGTTAAT  
AGTACAAATTATTACCGGTATTACATTAGCTATGCATTATAGTCCTAGTGAATGGAAGCTTTTAA  
CTCAATAGAGCATATAATGAGAGATGTTAATAACGGGTGATTAGTTCGTTATCTACATAGTAATA  
CAGCTTCTGCTTTCTTTTTCTTAGTGATTTACACATAGGAAGAGGTATATATTACGGATCATATA  
GAGCTCCTCGTACTTTAGTTTGAGCTATTGGTACTGTTATATTAATTAATGATGGCTATCGGTT  
TCCTAGGTTATGTTTTACCTTATGGACAGATGTCATTATGAGGTGCTACAGTTATTACTAATCTTA  
TTAGTGCTATACCTGAATAGGGCAAGATATTGTTGAATTCATTTGAGGTGGTTTTTCTGTTAATA  
ATGCCACTTTAAACAGATTTTTTGCAATTACATTTGTATTGCCTTTTGTATTAGCTGCTTTAGTTTTA  
ATGCACTTAATTGCACTTCATGATACTGCTGGTTCAAGCAATCCTCTTGGTGTTTCAGGTAATTAC  
GATAGAATTACATTTGCTCCATATTTTTATTTAAAGATTTAATTACTATTTTTATATTTATTTTTGTA  
TTAAGTGCTTTTGATTCTTTATGCCTAATGTTTTAGGGGATAGTGATAATTATATTATGGCTAATC  
CTATGCAAACCTCCTGCTGCTATTGTACCTGAATGATACTTATTACCTTTCTATGCTATTTTAAGATC  
TATACCTAATAAATTATTAGGTGTTATAGCGATGTTTAGTGCTATTTAGCTATTATGTTATTACCT  
GTTACAGATTTAGGTAGATCTAGAGGTTTACAATTTAGACCATTTAGTAAATAGCTTCTGAGTT  
TTTGTTGCTAATTTCTTAGTTTAAATGCAATTAGGTGCTAAACACGTTGAAGATCCATTTATATTAT  
TAGGTCAATTAAGTACTGTATTATACTTTAGTTATTTTGTTGCTATATTACCTTTAGCTAGTTACTT  
AGATAATAGTTTAACTGATTTATCTAATAAATCTGAATTATTTTAAATAAACTAACTAAATATAT  
TAAGATTATTATTTAATATATTTTCTATTTAAGATACTATTAATTTAGTATTTTGGGTTTTAGTTTA  
TAATTTATATTATATTATGCATTACCCTCCACCTTGCTTTGTAGTAAGCTAATCTGTTATTTCTTTA  
GTTTAAATGGTAGAACAAATGATCTTCTAATTCATTGGTTTTAGTTTGAATCTAAAAAGGAAATAAG  
AAATATATTCTTATTATTACTTATATAATAATTATTTCTTAAAAATATACATTTTGCAATTATAGCCGT  
TTAGCTGTATTAAATGTAAATGATATAAAATAGAATAAATATTTAAATTATTCCTATGTTATATT  
ATCCTATATTGCAACCATTATCAGAAGTTGTATTAATACTTGTACCTGCCTTATTAGCTGTAGCTT  
ATGTTACAGTTGCTGAAAGAAAACTATGGCTAGTATGCAAGAAGATTAGGTCCTAATGCTGT

AGGTTACTATGGACTATTGCAAGCATTGCTGATGCCTTAAACCTTTTATTTAAAGAATATGTAG  
CTCCTACACAATCTAATATTGTTCTTTTCTTTTAGGTCCTGTAATAACTTTAATTTTGCATTATTA  
GGTTACGCTGTTATACCCTATGGTCCTGGTTCAGGGATAAGCGACATGAATTTAGGTATATTTTA  
CATGTTAGCTGTGTCATCTTTAGCTACATACGGTATTCTATTAGCTGGTTGAAGTGCGAATAGTA  
AATACGCTTTTCTAGGTTCTCTTAGAAGTACAGCTCAATTAATTAGTTATGAATTAATATTAAGTT  
CAGCTATATTAATAGTAATTATGATAACAGGAAATTTAAATTTAACTGTTTGTACTGAATCTCAAA  
GAGCTATTTGATTTATACTACCTTTATTTCTGTGTTTATAATATTTTTCATAGGATCTATAGCTGA  
GACAAATAGAGCTCCTTTTGATTTAGCCGAGGCTAACCTGCTAATCTGGTTTGGTCTGGTTATAT  
GTCACAAATTGCTAGGAAACCTTTTTATTTAAAAACAAAAGACAATTAGCAGGAAACTTAATTT  
AACCTAATTAATAATATTAGATAATTAACCTCTTCATAGACTAAACGTGACAATTTAATATATATA  
TATATTTATTTATATATATGATTAAATAAGATATAGTCAATCATCGGTGTGAATCGACTTAAAAAA  
AAAAGCACATGGGTAAACCCATCTCCCCTTATTAGGGGAATCAGAAGTTGTTAGTGGGTTTCAT  
GACAGAGCATGCTGCCGTAGTTTTCGTATTCTTCTTTTAGCTGAGTACGGTAGTATTGTACTAAT  
GTGTATTTTAACTAGTATATTATTTATTGGTGGTTACTTATTATTTGAAATATCCTATGTTTTACTG  
TGGTAAATTATATTTTCTTTGAATTATTCTTTATAGACTGAGTAACATTTGTAGAGGTACAATCTTT  
ATACACTGATTTTTTAAATAATTCTATCATTGAAGGATTATTATATGGGTTTAACTAGGATTAAA  
AAGTTCTTTAATGATATTCACATTTATTTGAGCTAGAGCATCCTTCCCTAGAATACGATTTGATCA  
ACTAATGGGCTTCTGTTGAACAGTTTTATTACCTATTAATTTTGCAATTATTATATTAGTACCTTGT  
GTTTTATATAGTTTTAACTTATTACCTGTAAATATACCATTGTTCTAGCTCACACACCCGCCGCC  
CTACTGCCACAAGGCTACAGTACATATGAGGAGGGGAACTAAAGATCTAGAAGTATCCTAGTTA  
ATAATTACACTTAATAGTATACTAAATAGACCATCTATCATACTCGAGAATAGTGATAGTGTAAT  
TATACACTATTTTAACTGTATTCTACACTATTAGGATATTATTATCTTTATATGATAATAATTTTATA  
ACTTAATTTATTAGGTTACATTAACAAAAAATTCGTTAACTTTTTTCACCACTTTTAAATACAAAAT  
ACGAATTTTA

>YN391

ATAACAATTCTAAAGAACATAAAGAGTTATTAGATAAAAAATAATTCACCTATACAGTTAATAAAT  
CAACTTAAAGGGTATTTTTTCATAAATCCTTTATTAGCTTTAAGTTTAGCTATTACTATTTTCTCTTT  
TGCAGGTATTCCTCCTCTGTAGGGTTCTTTGCTAAACAGATGGTATTAAGCGCGGCTATTGATC  
AAGGTTATATCTTTTTATCTTTAGTTGCAATATTAAGTGTATAGGAGGGGTTTATTATTTAAA  
TATAATTAAGAAATGTTCTTTTATTCACCTGACTATAAATTAACGAAGAAATTAATAAATAC  
TATTAATGGTCAAATTATTAATAGAAACAATAAAATATTAATGTTGAATTTAATTATACAAATGT  
AGTTATGTCTAGTTCTGTGGCAATAACTATTTCTACTATTACATTAGTAGTTTTATTATTCATGTTT  
ATGAATAAAGAATGATTAAGTCTGGGTACTATATTGGTACAATCTTTATTTAGCTATTAATGAGTA  
GTATGACATTATTTATAGGGTTTGTATCTGTTATAGCTATTTTATTTTAGCCATTAATTTTATATTT  
GCTCCTCATAATCCTTATCAAGAAAAATATAGTATTTTCGAGTGTGGTTTCCATAGTTTTTTAGGG  
CAAAATAGAACACAATTCGGTATAAAATCTTTATTTTGCTTTAGTTTATTTACTTTTAGATTTAG  
AAATATTATTAACTTTCCCTTTCGCTCTTAGTGAGTATGTTAATGGTATTTATGGTCTTTTAGTTAC  
TTTAATTTTTATAGCTATAATAACTATAGGATTTATATTTGAATTAGGTAAAAGCGCTCTTAAATA  
GACAGCAGACAAAAATTATATATACCTAAATTGAACGTTAATTACCATACAGAGTATGTTGGAAT  
AGGTAAGGTTTCTAAGTAAAGTTATAGAGGCAGAAAACCAAAAAACCTACCAAAGGGTAGCTA  
ATGGGAAGCTATTAAAAATAAAGATGATAACCTATATATAGTATAGTTACTATATATTTACTATA  
ACTAGGATTATTATATATATATATATTATCTTATTGTATATTAAGATTATTATTATTATAAGGTATA  
ATTAATATAGTATCTTATTGTATAAGAATATAATATATTAACCTATAATTAATTTATTTTTAATTT  
TTAATTATAATTTTTTTTTATATCTAGATGCTTACACATCTACAGATGTAGAAGAGAACAAAATAT

TGTTGTTATAGTAGTGGATGATATAGAAAAATATTTTTATATTATTTATTTTTGTTAGGTAGCTTTT  
GAAGTGTGTTGATAGAGAGGATATATGGACGGTAGGAGGGTATTCATTTTAATGAACAGTGGATA  
GTTTAAATTAACCTAGTTATAGTTTATGAATTTAAATTATAATTATATTAATGTAGGTTATGATAGA  
ATTATGTATTGATCCTTAAGAGTTAAGAGAGATACGCCCACGTATAATACATATTGGTTTAGGGT  
TGAGTATATATACTTAAGAGTTAAGAATATATATATACAATATATAATAAATATAGTAATATATTA  
ATGGTATGGACTTAACCAGGTTTATATATTATCATTGATAAACATTAATTATAATTTTTCTATTTA  
TTATTATTATTATACTGTGAGATTAATAATTATTTAAATATAATATTACATAGTACGTGATATTTGG  
GGATTTTATCTTATTAATTGGCAATTAATGATTCTAATCAAATTTTATTCTCTTTAGTTTAATGGTA  
GAACAATGATCTTCTAATTCATTGGTTTTAGTTTCGATTCTAAAAAGAGATGAGTAAATAATTTTCT  
AGATCAGAAATACTACTTTTAACTACAAAAAGCTTACGCTTTTAAACATTTTTTTGATAAATAACA  
ACTATTGTTAATATTTGGCTGTCTATTGGTTTAACTACAATTACAAAATTTTTTCAATTTTTATAAT  
ATAAATTTAAATGAGAATATTTAAAAAGTCATTCATTATTTAAATTAGTGAATTCTTACCTTATCGA  
TGCGTCACAACCAAGTAACATTAGTTACTTGTGAAATTTTGGTTCATTATTAGCTGTTTGTTAAT  
AGTACAAATTATTACCGGTATTACATTAGCTATGCATTATAGTCCTAGTGAATGGAAGCTTTTAA  
CTCAATAGAGCATATAATGAGAGATGTTAATAACGGGTGATTAGTTCGTTATCTACATAGTAATA  
CAGCTTCTGCTTTCTTTTCTTAGTGATTACACATAGGAAGAGGTATATATTACGGATCATATA  
GAGCTCCTCGTACTTTAGTTTGAGCTATTGGTACTGTTATATTAATTAATGATGGCTATCGGTT  
TCCTAGGTTATGTTTTACCTTATGGACAGATGTCATTATGAGGTGCTACAGTTATTACTAATCTTA  
TTAGTGCTATACCTGAATAGGGCAAGATATTGTTGAATTCATTTGAGGTGGTTTTTCTGTTAATA  
ATGCCACTTTAAACAGATTTTTTGCAATTACATTTGTATTGCCTTTGTATTAGCTGCTTTAGTTTA  
ATGCACTTAATTGCACTTCATGATACTGCTGGTTCAAGCAATCCTCTGGTGTTTCAGGTAATTAC  
GATAGAATTACATTTGCTCCATATTTTTATTTAAAGATTTAATTACTATTTTTATATTTATTTTTGTA  
TTAAGTGCTTTGTATTCTTTATGCCTAATGTTTTAGGGGATAGTGATAATTATATTATGGCTAATC  
CTATGCAAACCTCCTGCTGCTATTGTACCTGAATGATACTTATTACCTTTCTATGCTATTTTAAGATC  
TATACCTAATAAATTATTAGGTGTTATAGCGATGTTTAGTGCTATTTAGCTATTATGTTATTACCT  
GTTACAGATTTAGGTAGATCTAGAGGTTTACAATTTAGACCATTTAGTAAAATAGCTTTCTGAGTT  
TTTGTTGCTAATTTCTTAGTTTTAATGCAATTAGGTGCTAAACACGTTGAAGATCCATTTATATTAT  
TAGGTCAATTAAGTACTGTATTATACTTTAGTTATTTTGTTGCTATATTACCTTTAGCTAGTTACTT  
AGATAATAGTTTAACTGATTTATCTAATAAATCTGAATTATTTTAAATAAACTAACTAAATATAT  
TAAGATTATTATTTAATATATTTTCTATTTAAGATACTATTAATTTAGTATTTTGGGTTTTAGTTTA  
TAATTTATATTATATTATGCATTACCCTCCACCTTGCTTTGTAGTAAGCTAATCTGTTATTTCTTTA  
GTTTAATGGTAGAACAATGATCTTCTAATTCATTGGTTTTAGTTTGAATCTAAAAAGGAAATAAG  
AAATATATTCTTATTATTACTTATATAATAATTATTTCTTAAAAATATACATTTTGCAATTATAGCCGT  
TTAGCTGTATTAAATGTAAATGATATAAAATAGAATAAATATTTAAATTATTCCTATGTTATATT  
ATCCTATATTGCAACCATTATCAGAAGTTGTATTAATACTTGTACCTGCCTTATTAGCTGTAGCTT  
ATGTTACAGTTGCTGAAAGAAAACTATGGCTAGTATGCAAAGAAGATTAGGTCCTAATGCTGT  
AGGTTACTATGGACTATTGCAAGCATTTGCTGATGCCTTAAACCTTTTATTAAGAATATGTAG  
CTCCTACACAATCTAATATTGTTCTTTTCTTTTAGGTCCTGTAATAACTTTAATTTTTGCATTATTA  
GGTTACGCTGTTATACCCTATGGTCCTGGTTCAGGATAAGCGACATGAATTTAGGTATATTTTA  
CATGTTAGCTGTGTCATCTTTAGCTACATACGGTATTCTATTAGCTGGTTGAAGTGCGAATAGTA  
AATACGCTTTTCTAGGTTCTCTTAGAAGTACAGCTCAATTAATTAGTTATGAATTAATTAAGTT  
CAGCTATATTAATAGTAATTATGATAACAGGAAATTTAAATTTAACTGTTTGTACTGAATCTCAAA  
GAGCTATTTGATTTATACTACCTTTATTTCTGTGTTTATAATATTTTTCATAGGATCTATAGCTGA  
GACAAATAGAGCTCCTTTTGATTTAGCCGAGGCTAACCTGCTAATCTGGTTTGGTCTGGTTATAT

GTCACAAATTGCTAGGAAACCTTTTTATTTTAAAAACAAAAGACAATTAGCAGGAACTTAATTT  
AACCTAATTAATAATATTAGATAATTAACCTCTTCATAGACTAAACGTGACAATTTAATATATATA  
TATATTTATTTATATATATGATTAAATAAGATATAGTCAATCATCGGTGTGAATCGACTTAAAAAA  
AAAAGCACATGGGTAAACCCATCTCCCCTTATTAGGGGAATCAGAACTTGTTAGTGGGTTTCAT  
GACAGAGCATGCTGCCGTAGTTTTCGTATTCTTCTTTTAGCTGAGTACGGTAGTATTGTACTAAT  
GTGTATTTTAACTAGTATATTATTTATTGGTGGTTACTTATTATTTGAAATATCCTATGTTTTACTG  
TGGTAAATTATATTTTCTTTGAATTATTCTTTATAGACTGAGTAACATTTGTAGAGGTACAATCTTT  
ATACACTGATTTTTTAAATAATTCTATCATTGAAGGATTATTATATGGGTTTAATCTAGGATTAAA  
AAGTTCTTTAATGATATTCACATTTATTTGAGCTAGAGCATCCTTCCCTAGAATACGATTTGATCA  
ACTAATGGGCTTCTGTTGAACAGTTTTATTACCTATTAATTTTGCAATTATTATATTAGTACCTTGT  
GTTTTATATAGTTTTAACTTATTACCTGTAAATATACCATTGTTCTAGCTCACACACCCGCCGCC  
CTACTGCCACAAGGCTACAGTACATATGAGGAGGGGAACCTAAAGATCTAGAACTATCCTAGTTA  
ATAATTACACTTAATAGTATACTAAATAGACCATCTATCATACTCGAGAATAGTGATAGTGTAAT  
TATACACTATTTTAACTGTATTCTACACTATTAGCATATTATTATCTTTATATGATAATAATTTTATA  
ACTTAATTTATTAGGTTACATTAACAAAAAATTCGTTAACTTTTTTCACCACTTTTTAATACAAAAT  
ACGAATTTTA

>YN397

ATAACAATTCTAAAGAACATAAAGAGTTATTAGATAAAAAATAATTCACCTATACAGTTAATAAAT  
CAACTTAAAGGGTATTTTTTCATAAATCCTTTATTAGCTTTAAGTTAGCTATTACTATTTTCTCTTT  
TGCAGGTATTCCTCCTCTTGTAGGGTCTTTGCTAAACAGATGGTATTAAGCGCGGCTATTGATC  
AAGGTTATATCTTTTTATCTTTAGTTGCAATATTAAGTGTATAGGAGGGGTTTATTATTTAAA  
TATAATTAAGAAATGTTCTTTTATTCACCTGACTATAAATTAACGAAGAAATTAATAAATAC  
TATTAATGGTCAAATTATTAATAGAAACAATAAAATATTAATGTTGAATTTAATTATACAAATGT  
AGTTATGTCTAGTTCTGTGGCAATAACTATTTCTACTATTACATTAGTAGTTTTATTATTCATGTTT  
ATGAATAAAGAATGATTAAGTCTGGGTACTATATTGGTACAATCTTTATTTAGCTATTAATGAGTA  
GTATGACATTATTTATAGGGTTTGTATCTGTTATAGCTATTTTATTTTAGCCATTAATTTTATATTT  
GCTCCTCATAATCCTTATCAAGAAAAATATAGTATTTTCGAGTGTGGTTTCCATAGTTTTTTAGGG  
CAAAATAGAACACAATTCGGTATAAAATCTTTATTTTGCTTTAGTTTATTTACTTTTAGATTTAG  
AAATATTATTAACCTTCCCTTTCGCTCTTAGTGAGTATGTTAATGGTATTTATGGTCTTTTAGTTAC  
TTTAATTTTTATAGCTATAATAACTATAGGATTTATATTTGAATTAGGTAAAAGCGCTCTTAAATA  
GACAGCAGACAAAAATTATATACCTAAATTGAACGTTAATTACCATACAGAGTATGTTGGAAT  
AGGTAAGGTTTCTAAGTAAAGTTATAGAGGCAGAAAACCAAAAAACCTACCAAAGGGTAGCTA  
ATGGGAAGCTATTAATAAAGATGATAACCTATATATAGTATAGTTACTATATATTTACTATA  
ACTAGGATTATTATATATATATATATTATCTTATTGTATATTAAGATTATTATTATAAGGTATA  
ATTAATATAGTATCTTATTGTATAAGAATATAATATATTAACCTATAATTAATTTATTTTTAATTT  
TTAATTATAATTTTTTTTTATATCTAGATGCTTACACATCTACAGATGTAGAAGAGAACAAAATAT  
TGTTGTTATAGTAGTGATATAGAAAAATATTTTATATTATTTATTTTGTAGGTAGCTTTT  
GAAGTGTGATAGAGAGGATATATGGACGGTAGGAGGTATTCATTTAATGAACAGTGGATA  
GTTTAAATTAACCTAGTTATAGTTTATGAATTTAAATTATAATTATATTAATGTAGGTTATGATAGA  
ATTATGTATTGATCCTTAAGAGTTAAGAGAGATACGCCACGTATAATACATATTGGTTAGGGT  
TGAGTATATATACTTAAGAGTTAAGAATATATATATACAATATATAATAAATATAGTAATATATTA  
ATGGTATGGACTTAACCAGGTTTATATATTATCATTTGATAAACATTAATTATAATTTTTCTATTTA  
TTATTATTATACTGTGAGATTAATAATTATTAATAATATTACATAGTACGTGATATTTGG  
GGATTTTATCTTATTAATTGGCAATTAATGATTCTAATCAAATTTTATTCTCTTAGTTTAATGGTA

GAACAATGATCTTCTAATTCATTGGTTTTAGTTTCGATTCTAAAAAGAGATGAGTAAATAATTTTCT  
AGATCAGAAATACTACTTTTAACTACAAAAAGCTTACGCTTTTAAACATTTTTTTGATAAATAACA  
ACTATTGTTAATATTTGGCTGTCTATTGGTTTAACTAACAATTACAAAATTTTTCAATTTTTATAAT  
ATAAATTTAAATGAGAATATTAATAAGTCATTATTATTAATAATTAGTGAATTCTTACCTTATCGA  
TGCGTCACAACCAAGTAACATTAGTTACTTGTGAAATTTTGGTTCATTATTAGCTGTTTGTTAAT  
AGTACAAATTATTACCGGTATTACATTAGCTATGCATTATAGTCCTAGTGAATGGAAGCTTTTAA  
CTCAATAGAGCATATAATGAGAGATGTTAATAACGGGTGATTAGTTCGTTATCTACATAGTAATA  
CAGCTTCTGCTTTCTTTTTCTTAGTGATTTACACATAGGAAGAGGTATATATTACGGATCATATA  
GAGCTCCTCGTACTTTAGTTTGAGCTATTGGTACTGTTATATTAATTAATGATGGCTATCGGT  
TCCTAGGTTATGTTTTACCTTATGGACAGATGTCATTATGAGGTGCTACAGTTATTACTAATCTTA  
TTAGTGCTATACCTGAATAGGGCAAGATATTGTTGAATTCATTTGAGGTGGTTTTCTGTAAATA  
ATGCCACTTTAAACAGATTTTTGCATTACATTTGTATTGCCTTTGTATTAGCTGCTTTAGTTTAA  
ATGCACTTAATTGCACTTCATGATACTGCTGGTTCAAGCAATCCTCTGGTGTTTCAGGTAATTAC  
GATAGAATTACATTTGCTCCATATTTTTATTTAAAGATTTAATTACTATTTTTATTTATTTTTGTA  
TTAAGTGCTTTTGATTCTTTATGCCTAATGTTTTAGGGGATAGTGATAATTATATTATGGCTAATC  
CTATGCAAACCTCTGCTGCTATTGTACCTGAATGATACTTATTACCTTTCTATGCTATTTTAAGATC  
TATACCTAATAAATTATTAGGTGTTATAGCGATGTTTAGTGCTATTTTAGCTATTATGTTATTACCT  
GTTACAGATTTAGGTAGATCTAGAGGTTTACAATTTAGACCATTTAGTAAATAGCTTTCTGAGTT  
TTTGTTGCTAATTTCTTAGTTTTAATGCAATTAGGTGCTAAACACGTTGAAGATCCATTTATATTAT  
TAGGTCAATTAAGTACTGTATTATACTTTAGTTATTTTTGTTGCTATATTACCTTTAGCTAGTTACTT  
AGATAATAGTTTAACTGATTTATCTAATAAATCTGAATTATTTTAAATAAACTAACTAAATATAT  
TAAGATTATTATTTAATATATTTTCTATTTAAGATACTATTAATTTAGTATTTTGGGTTTTCAGTTTA  
TAATTTATATTATATTATGCATTACCTCCACCTTGCTTTGTAGTAAGCTAATCTGTTATTTCTTTA  
GTTTAATGGTAGAACAATGATCTTCTAATTCATTGGTTTTAGTTTCGAATCTAAAAAGGAAATAAG  
AAATATATTCTTATTATTACTTATATAATAATTATTTCTTAAAAATATACATTTTGCATTATAGCCGT  
TTAGCTGTATTAATAATGTAAATGATATAAAATAGAATAAATATTTAAATTATTCCTATGTTATATT  
ATCCTATATTGCAACCATTATCAGAAGTTGTATTAATACTTGTACCTGCCTTATTAGCTGTAGCTT  
ATGTTACAGTTGCTGAAAGAAAACTATGGCTAGTATGCAAAGAAGATTAGGTCCTAATGCTGT  
AGGTTACTATGGACTATTGCAAGCATTGCTGATGCCTTAAACTTTTATTAAGAATATGTAG  
CTCCTACACAATCTAATATTGTTCTTTCTTTTAGGTCCTGTAATAACTTTAATTTTTGCATTATTA  
GGTTACGCTGTTATACCCTATGGTCCTGGTTCAGGGATAAGCGACATGAATTTAGGTATATTTTA  
CATGTTAGCTGTGTCATCTTTAGCTACATACGGTATTCTATTAGCTGGTTGAAGTGCGAATAGTA  
AATACGCTTTTCTAGGTTCTCTTAGAAGTACAGCTCAATTAATTAGTTATGAATTAATTAAGTT  
CAGCTATATTAATAGTAATTATGATAACAGGAAATTTAAATTTAACTGTTTGTACTGAATCTCAAA  
GAGCTATTTGATTTATACTACCTTTATTTCTGTGTTTATAATTTTTTCATAGGATCTATAGCTGA  
GACAAATAGAGCTCCTTTTGATTTAGCCGAGGCTAACCTGCTAATCTGGTTTGGTCTGGTTATAT  
GTCACAAATTGCTAGGAAACCTTTTTATTTTAAAAACAAAAGACAATTAGCAGGAAACTTAATTT  
AACCTAATTAATAATATTAGATAATTAACCTCTTCATAGACTAAACGTGACAATTTAATATATATA  
TATATTTATTTATATATATGATTAAATAAGATATAGTCAATCATCGGTGTGAATCGACTTAAAAAA  
AAAAGCACATGGGTAAACCCATCTCCCCTATTAGGGGAATCAGAACTTGTTAGTGGGTTTCAT  
GACAGAGCATGCTGCCGTAGTTTTCGTATTCTTCTTTTAGCTGAGTACGGTAGTATTGTACTAAT  
GTGTATTTTAACTAGTATATTATTTATTGGTGGTTACTTATTATTTGAAATATCCTATGTTTTTACTG  
TGGTAAATTATATTTCTTTGAATTATTCTTTATAGACTGAGTAACATTTGTAGAGGTACAATCTTT  
ATACACTGATTTTTTAAATAATTCTATCATTGAAGGATTATTATATGGGTTAATCTAGGATTAAA

AAGTTCTTTAATGATATTCACATTTATTTGAGCTAGAGCATCCTTCCCTAGAATACGATTTGATCA  
ACTAATGGGCTTCTGTTGAACAGTTTTATTACCTATTAATTTTGCAATTATTATATTAGTACCTTGT  
GTTTTATATAGTTTTAACTTATTACCTGTAAATATACCATTGTTCTAGCTCACACACCCGCCGCC  
CTACTGCCACAAGGCTACAGTACATATGAGGAGGGGAAGTAAAGATCTAGAACTATCCTAGTTA  
ATAATTACACTTAATAGTATACTAAATAGACCATCTATCATACTCGAGAATAGTGATAGTGTAAT  
TATACACTATTTTAACTGTATTCTACACTATTAGCATATTATTATCTTTATATGATAATAATTTTATA  
ACTTAATTTATTAGGTTACATTAACAAAAAATTCGTTAACTTTTTTCACCACTTTTAAATACAAAAT  
ACGAATTTTA

>YN398

ATAACAATTCTAAAGAACATAAAGAGTTATTAGATAAAAAATAATTCACCTATACAGTTAATAAAT  
CAACTTAAAGGGTATTTTTTCATAAATCCTTTATTAGCTTTAAGTTTAGCTATTACTATTTCTCTTT  
TGCAGGTATTCTCCTCTTGTAGGGTCTTTGCTAAACAGATGGTATTAAGCGCGGCTATTGATC  
AAGGTTATATCTTTTTATCTTTAGTTGCAATATTAAGTGTATAGGAGGGGTTTATTATTTAAA  
TATAATTAAGAAATGTTCTTTTATTCACCTGACTATAAATTAACGAAGAAATTAATAAATAC  
TATTAATGGTCAAATTATTAATAGAAACAATAAATATTAATGTTGAATTTAATTATACAAATGT  
AGTTATGTCTAGTTCTGTGGCAATAACTATTTCTACTATTACATTAGTAGTTTTATTATTCATGTTT  
ATGAATAAAGAATGATTAAGTCTGGGTACTATATTGGTACAATCTTTATTTAGCTATTAATGAGTA  
GTATGACATTATTTATAGGGTTGTATCTGTTATAGCTATTTTATTTTAGCCATTAATTTTATATTT  
GCTCCTCATAATCCTTATCAAGAAAAATATAGTATTTTCGAGTGTGGTTTCCATAGTTTTTTAGGG  
CAAAATAGAACACAATTCGGTATAAAATTCCTTTATTTTGTCTTAGTTTATTTACTTTTAGATTTAG  
AAATATTATTAACTTTCCCTTCGCTCTTAGTGAGTATGTTAATGGTATTTATGGTCTTTTAGTTAC  
TTTAATTTTTATAGCTATAATAACTATAGGATTTATATTTGAATTAGGTAAGCGCTCTTAAATA  
GACAGCAGACAAAAATTATATATACCTAAATTGAACGTTAATTACCATACAGAGTATGTTGGAAT  
AGGTAAGGTTTCTAAGTAAAGTTATAGAGGCAGAAAACCAAAAAACCTACCAAAGGGTAGCTA  
ATGGGAAGCTATTAATAAATAAAGATGATAACCTATATATAGTATAGTTACTATATATTTACTATA  
ACTAGGATTATTATATATATATATATTATCTTATTGTATATTAAGATTATTATTATAAGGTATA  
ATTAATATAGTATCTTATTGTATAAGAATATAATATATTAACCTATAATTAATTTTATTTTTAATTT  
TTAATTATAATTTTTTTTTATATCTAGATGCTTACACATCTACAGATGTAGAAGAGAACAAAATAT  
TGTTGTTATAGTAGTGGATGATATAGAAAAATATTTTTATATTATTTATTTTGTAGGTAGCTTTT  
GAAGTGTGTTGATAGAGAGGATATATGGACGGTAGGAGGGTATTCATTTAATGAACAGTGGATA  
GTTTAAATTAACCTAGTTATAGTTTATGAATTTAAATTATAATTATATTAATGTAGGTTATGATAGA  
ATTATGTATTGATCCTTAAGAGTTAAGAGAGATACGCCACGTATAATACATATTGGTTTAGGGT  
TGAGTATATATACTTAAGAGTTAAGAATATATATATACAATATATAATAAATATAGTAATATATTA  
ATGGTATGGACTTAACCAGGTTTATATATTATCATTTGATAAACATTAATTATAATTTTTCTATTTA  
TTATTATTATTATACTGTGAGATTAATAATTATTAATAATATAATATTACATAGTACGTGATATTTGG  
GGATTTTATCTTATTAATTGGCAATTAATGATTCTAATCAAATTTTATTCTCTTAGTTAATGGTA  
GAACAATGATCTTCTAATTCATTGGTTTTAGTTTCGATTCTAAAAAGAGATGAGTAAATAATTTTCT  
AGATCAGAAATACTACTTTTAACTACAAAAGCTTACGCTTTTAAACATTTTTTGTAAATAACA  
ACTATTGTTAATATTTGGCTGTCTATTGGTTTAACTAACAATTACAAAATTTTTCAATTTTTATAAT  
ATAAATTTAAATGAGAATATTAATAAAGTCATTCATTATTAATAAATTAGTGAATCTTACCTTATCGA  
TGCGTCACAACCAAGTAACATTAGTTACTTGTGAAATTTTGGTTCATTATTAGCTGTTTGTAAAT  
AGTACAAATTATTACCGGTATTACATTAGCTATGCATTATAGTCCTAGTGTAATGGAAGCTTTTAA  
CTCAATAGAGCATATAATGAGAGATGTTAATAACGGGTGATTAGTTCGTTATCTACATAGTAATA  
CAGCTTCTGCTTTCTTTTCTTAGTGTATTTACACATAGGAAGAGGTATATATTACGGATCATATA

GAGCTCCTCGTACTTTAGTTTGAGCTATTGGTACTGTTATATTAATATTAATGATGGCTATCGGTT  
TCCTAGGTTATGTTTTACCTTATGGACAGATGTCATTATGAGGTGCTACAGTTATTACTAATCTTA  
TTAGTGCTATACCTGAATAGGGCAAGATATTGTTGAATTCATTTGAGGTGGTTTTCTGTTAATA  
ATGCCACTTTAAACAGATTTTTGCATTACATTTGTATTGCCTTTGTATTAGCTGCTTTAGTTTTA  
ATGCACTTAATTGCACTTCATGATACTGCTGGTTCAAGCAATCCTCTTGGTGTTCAGGTAATTAC  
GATAGAATTACATTTGCTCCATATTTTTATTTAAAGATTTAATTACTATTTTTATATTTATTTTTGTA  
TTAAGTGCTTTTGTATTCTTTATGCCTAATGTTTTAGGGGATAGTGATAATTATATTATGGCTAATC  
CTATGCCAACTCCTGCTGCTATTGTACCTGAATGATACTTATTACCTTTCTATGCTATTTAAGATC  
TATACCTAATAAATTATTAGGTGTTATAGCGATGTTTAGTGCTATTTTAGCTATTATGTTATTACCT  
GTTACAGATTTAGGTAGATCTAGAGGTTTACAATTTAGACCATTTAGTAAAATAGCTTTCTGAGTT  
TTTGTTGCTAATTTCTTAGTTTTAATGCAATTAGGTGCTAAACACGTTGAAGATCCATTTATATTAT  
TAGGTCAATTAAGTACTGTATTATACTTTAGTTATTTTGTGCTATATTACCTTTAGCTAGTTACTT  
AGATAATAGTTTAACTGATTTATCTAATAAATCTGAATTATTTTAAATAAAACTAACTAAATATAT  
TAAGATTATTATTTAATATATTTTCTATTTAAGATACTATTAATTTAGTATTTTGGGTTTTCAGTTTA  
TAATTTATATTATATTATGCATTACCCTCCACCTTGCTTTGTAGTAAGCTAATCTGTTATTTCTTTA  
GTTAATGGTAGAACAATGATCTTCTAATTCATTGGTTTTAGTTCGAATCTAAAAAGGAAATAAG  
AAATATATTCTTATTATTACTTATATAATAATTATTTCTTAAAAATATACATTTTGCATTATAGCCGT  
TTAGCTGTATTAATAATGTAAATGATATAAAATAGAATAAATATTTAAATTATTCCTATGTTATATT  
ATCCTATATTGCAACCATTATCAGAAGTTGTATTAATACTTGTACCTGCCTTATTAGCTGTAGCTT  
ATGTTACAGTTGCTGAAAGAAAAACTATGGCTAGTATGCAAAGAAGATTAGGTCCTAATGCTGT  
AGGTTACTATGGACTATTGCAAGCATTTGCTGATGCCTTAAACTTTTTATTAAGAATATGTAG  
CTCCTACACAATCTAATATTGTTCTTTTCTTTTAGGTCCTGTAATAACTTTAATTTTGCATTATTA  
GGTTACGCTGTTATACCCTATGGTCCTGGTTCAGGGATAAGCGACATGAATTTAGGTATATTTA  
CATGTTAGCTGTGTCATCTTTAGCTACATACGGTATTCTATTAGCTGGTTGAAGTGCGAATAGTA  
AATACGCTTTTCTAGGTTCTCTTAGAAGTACAGCTCAATTAATTAGTTATGAATTAATATTAAGTT  
CAGCTATATTAATAGTAATTATGATAACAGGAAATTTAAATTTAACTGTTTGTACTGAATCTCAAA  
GAGCTATTTGATTTATACTACCTTTATTTCTGTGTTTATAATTTTTTCATAGGATCTATAGCTGA  
GACAAATAGAGCTCCTTTTGATTTAGCCGAGGCTAACCTGCTAATCTGGTTTGGTCTGGTTATAT  
GTCACAAATTGCTAGGAAACCTTTTTATTTAAAAACAAAAGACAATTAGCAGGAACTTAATTT  
AACCTAATTAATAATATTAGATAATTAACTCTTCATAGACTAAACGTGACAATTTAATATATATA  
TATATTTATTTATATATATGATTAATAAGATATAGTCAATCATCGGTGTGAATCGACTTAAAAAA  
AAAAGCACATGGGTAAACCCATCTCCCCTTATTAGGGGAATCAGAACTTGTTAGTGGGTTTCAT  
GACAGAGCATGCTGCCGTAGTTTTCGTATTCTTCTTTTAGCTGAGTACGGTAGTATTGTACTAAT  
GTGTATTTTAACTAGTATATTATTTATTGGTGGTTACTTATTATTTGAAATATCCTATGTTTTACTG  
TGGTAAATTATTTTTCTTTGAATTATTCTTTATAGACTGAGTAACATTTGTAGAGGTACAATCTTT  
ATACACTGATTTTTTAAATAATTCTATCATTGAAGGATTATTATATGGGTTTAACTAGGATTA  
AAGTTCTTTAATGATATTCACATTTATTTGAGCTAGAGCATCCTTCCCTAGAATACGATTTGATCA  
ACTAATGGGCTTCTGTTGAACAGTTTTATTACCTATTAATTTTGCAATTATTATATTAGTACCTTGT  
GTTTTATATAGTTTTAACTTATTACCTGTAAATATACCATTGTTCTAGCTCACACACCCGCCGCC  
CTACTGCCACAAGGCTACAGTACATATGAGGAGGGGAACTAAAGATCTAGAACTATCCTAGTTA  
ATAATTACACTTAATAGTATACTAAATAGACCATCTATCATACTCGAGAATAGTGATAGTGTAAT  
TATACACTATTTTAACTGTATTCTACACTATTAGCATATTATTATCTTTATATGATAATAATTTATA  
ACTTAATTTATTAGGTTACATTAACAAAAAATTCGTTAACTTTTTTCACCACTTTTAAATACAAAAT  
ACGAATTTA

>YN406

ATAACAATTCTAAAGAACATAAAGAGTTATTAGATAAAAAATAATTCACCTATACAGTTAATAAAT  
CAACTTAAAGGGTATTTTTTCATAAATCCTTTATTAGCTTTAAGTTTAGCTATTACTATTTCTCTTT  
TGCAGGTATTCCTCCTCTTG TAGGGTCTTTGCTAAACAGATGGTATTAAGCGCGGCTATTGATC  
AAGGTTATATCTTTTTATCTTTAGTTGCAATATTAAGTAGTGTTATAGGAGGGGTTTATTATTTAAA  
TATAATTAAGAAATGTTCTTTTATTCACCTGACTATAAATTAACGAAGAAATTAATAAATAATAC  
TATTAATGGTCAAATTATTAATAGAAACAATAAAATATTAATGTTGAATTTAATTATACAAATGT  
AGTTATGTCTAGTTCTGTGGCAATAACTATTTCTACTATTACATTAGTAGTTTTATTATTCATGTTT  
ATGAATAAAGAATGATTAAGTCTGGGTACTATATTGGTACAATCTTTATTTAGCTATTAATGAGTA  
GTATGACATTATTTATAGGGTTTGTATCTGTTATAGCTATTTTATTTTATAGCCATTAATTTATATTT  
GCTCCTCATAATCCTTATCAAGAAAAATATAGTATTTTCGAGTGTGGTTTCCATAGTTTTTTAGGG  
CAAAATAGAACACAATTCGGTATAAAATTCTTTATTTTGTCTTAGTTTATTTACTTTTAGATTTAG  
AAATATTATTAACTTTCCCTTTTCGCTCTTAGTGAGTATGTTAATGGTATTTATGGTCTTTTAGTTAC  
TTTAATTTTTTATAGCTATAATAACTATAGGATTTATATTTGAATTAGGTAAAAGCGCTCTTAAATA  
GACAGCAGACAAAAATTATATATACCTAAATTGAACGTTAATTACCATACAGAGTATGTTGGAAT  
AGGTAAGGTTTCTAAGTAAAGTTATAGAGGCAGAAAACCAAAAAACCTACCAAAGGGTAGCTA  
ATGGGAAGCTATTAATAAATAAAGATGATAACCTATATATAGTATAGTTACTATATATTTACTATA  
ACTAGGATTATTATATATATATATATTATCTTATTGTATATTAAGATTATTATTATTATAAGGTATA  
ATTAATATAGTATCTTATTGTATAAGAATATAATATATTAACCTATAATTAATTTTATTTTTTAATTT  
TTAATTATAATTTTTTTTTATATCTAGATGCTTACACATCTACAGATGTAGAAGAGAACAAAATAT  
TGTTGTTATAGTAGTGATATAGAAAAATATTTTTATATTATTTATTTTGTAGGTAGCTTTT  
GAAGTGTTTGATAGAGAGGATATATGGACGGTAGGAGGGTATTCATTTTAATGAACAGTGGATA  
GTTTAAATTAACCTAGTTATAGTTTATGAATTTAAATTATAATTATATTAATGTAGGTTATGATAGA  
ATTATGTATTGATCCTTAAGAGTTAAGAGAGATACGCCACGTATAATACATATTGGTTTAGGGT  
TGAGTATATATACTTAAGAGTTAAGAATATATATATACAATATATAATAAATATAGTAATATATTA  
ATGGTATGGACTTAACCAGGTTTATATATTATCATTGATAAACATTAATTATAATTTTTCTATTTA  
TTATTATTATTATACTGTGAGATTAATAATTATTAATAATATAATATTACATAGTACGTGATATTTGG  
GGATTTTATCTTATTAATTGGCAATTAATGATTCTAATCAAATTTTATTCTCTTAGTTTAATGGTA  
GAACAATGATCTTCTAATTCATTGGTTTTAGTTTCGATTCTAAAAAGAGATGAGTAAATAATTTTCT  
AGATCAGAAATACTACTTTTAACTACAAAAAGCTTACGCTTTTAAACATTTTTTGTAAATAACA  
ACTATTGTTAATATTTGGCTGTCTATTGGTTTAACTACAATTACAAAATTTTTCAATTTTTATAAT  
ATAAATTTAAATGAGAATATTAATAAAGTCATTCAATTATTAATAAATTAGTGAATTCTACCTTATCGA  
TGCGTCACAACCAAGTAACATTAGTTACTTGTGAAATTTTGGTTCATTATTAGCTGTTTGTAAAT  
AGTACAAATTATTACCGGTATTACATTAGCTATGCATTATAGTCCTAGTGAATGGAAGCTTTTAA  
CTCAATAGAGCATATAATGAGAGATGTTAATAACGGGTGATTAGTTCGTTATCTACATAGTAATA  
CAGCTTCTGCTTTCTTTTCTTAGTGATTTACACATAGGAAGAGGTATATATTACGGATCATATA  
GAGCTCCTCGTACTTTAGTTTGAGCTATTGGTACTGTTATATTAATTAATGATGGCTATCGGTT  
TCCTAGGTTATGTTTTACCTTATGGACAGATGTCATTATGAGGTGCTACAGTTATTACTAATCTTA  
TTAGTGCTATACCTGAATAGGGCAAGATATTGTTGAATTCATTTGAGGTGGTTTTTCTGTAAATA  
ATGCCACTTTAAACAGATTTTTTGCAATTACATTTGTATTGCCTTTTGTATTAGCTGCTTTAGTTTA  
ATGCACTTAATTGCACTTCATGATACTGCTGGTTCAAGCAATCCTCTTGGTGTTTCAGGTAATTAC  
GATAGAATTACATTTGCTCCATATTTTTATTTAAAGATTTAATTACTATTTTTATATTTATTTTGT  
TTAAGTGCTTTTGTATTCTTTATGCCTAATGTTTTAGGGGATAGTGATAATTATATTATGGCTAATC  
CTATGCAAACCTCCTGCTGCTATTGTACCTGAATGATACTTATTACCTTTCTATGCTATTTTAAGATC

TATACCTAATAAATTATTAGGTGTTATAGCGATGTTTAGTGCTATTTTAGCTATTATGTTATTACCT  
GTTACAGATTTAGGTAGATCTAGAGGTTTACAATTTAGACCATTTAGTAAAATAGCTTTCTGAGTT  
TTTGTTGCTAATTTCTTAGTTTTAATGCAATTAGGTGCTAAACACGTTGAAGATCCATTTATATTAT  
TAGGTCAATTAAGTACTGTATTATACTTTAGTTATTTTGTGCTATATTACCTTTAGCTAGTTACTT  
AGATAATAGTTTAACTGATTTATCTAATAAATCTGAATTATTTTAAATAAACTAACTAAATATAT  
TAAGATTATTATTTAATATATTTTCTATTTAAGATACTATTAATTTAGTATTTTGGGTTTTCAGTTTA  
TAATTTATATTATATTATGCATTACCCTCCACCTTGCTTTGTAGTAAGCTAATCTGTTATTTCTTTA  
GTTTAATGGTAGAACAATGATCTTCTAATTCATTGGTTTTAGTTCGAATCTAAAAAGGAAATAAG  
AAATATATTCTTATTATTACTTATATAATAATTATTTCTTAAAAATATACATTTTGCATTATAGCCGT  
TTAGCTGTATTTAAATGTAAATGATATAAAATAGAATAAATATTTAAATTATTCCTATGTTATATT  
ATCCTATATTGCAACCATTATCAGAAGTTGTATTAATACTTGTACCTGCCTTATTAGCTGTAGCTT  
ATGTTACAGTTGCTGAAAGAAAACTATGGCTAGTATGCAAAGAAGATTAGGTCCTAATGCTGT  
AGGTTACTATGGACTATTGCAAGCATTGCTGATGCCTTAAACTTTTTATTAAGAATATGTAG  
CTCCTACACAATCTAATATTGTTCTTTTCTTTTAGGTCCTGTAATAACTTTAATTTTGCATTATTA  
GGTTACGCTGTTATACCCTATGGTCCTGGTTCAGGGATAAGCGACATGAATTTAGGTATATTTTA  
CATGTTAGCTGTGTCATCTTTAGCTACATACGGTATTCTATTAGCTGGTTGAAGTGCGAATAGTA  
AATACGCTTTTCTAGGTTCTCTTAGAAGTACAGCTCAATTAATTAGTTATGAATTAATATTAAGTT  
CAGCTATATTAATAGTAATTATGATAACAGGAAATTTAAATTTAACTGTTTGTACTGAATCTCAAA  
GAGCTATTTGATTTATACTACCTTTATTTCTGTGTTTATAATATTTTTCATAGGATCTATAGCTGA  
GACAAATAGAGCTCCTTTTGATTTAGCCGAGGCTAACCTGCTAATCTGGTTTGGTCTGGTTATAT  
GTCACAAATTGCTAGGAAACCTTTTTATTTAAAAACAAAAGACAATTAGCAGGAACTTAATTT  
AACCTAATTAATAATATTAGATAATTAACTCTTCATAGACTAAACGTGACAATTTAATATATATA  
TATATTTATTTATATATATGATTAATAAGATATAGTCAATCATCGGTGTGAATCGACTTAAAAAA  
AAAAGCACATGGGTAAACCCATCTCCCCTTATTAGGGGAATCAGAACTTGTTAGTGGGTTTCAT  
GACAGAGCATGCTGCCGTAGTTTTCGTATTCTTCTTTTAGCTGAGTACGGTAGTATTGTACTAAT  
GTGTATTTTAACTAGTATATTATTTATTGGTGGTTACTTATTATTTGAAATATCCTATGTTTTACTG  
TGGTAAATTATATTTTCTTTGAATTATTCTTTATAGACTGAGTAACATTTGTAGAGGTACAATCTTT  
ATACACTGATTTTTTAAATAATTCTATCATTGAAGGATTATTATATGGGTTTAACTAGGATTAAA  
AAGTTCTTTAATGATATTCACATTTATTTGAGCTAGAGCATCCTTCCCTAGAATACGATTTGATCA  
ACTAATGGGCTTCTGTTGAACAGTTTTATTACCTATTAATTTGCAATTATTATATTAGTACCTTGT  
GTTTTATATAGTTTTAACTTATTACCTGTAAATATACCATTGTTCTAGCTCACACACCCGCCGCC  
CTACTGCCACAAGGCTACAGTACATATGAGGAGGGGAATAAGATCTAGAACTATCCTAGTTA  
ATAATTACACTTAATAGTATACTAAATAGACCATCTATCACTCGAGAATAGTGATAGTGTAAT  
TATACACTATTTTAACTGTATTCTACACTATTAGCATATTATTATCTTTATATGATAATAATTTTATA  
ACTTAATTTATTAGGTTACATTAACAAAAAATTCGTTAACTTTTTTCACCACTTTTAAATACAAAAAT  
ACGAATTATA

>YN410

ATAACAATTCTAAAGAACATAAAGAGTTATTAGATAAAAAATAATTCACCTATACAGTTAATAAAT  
CAACTTAAAGGGTATTTTTTCATAAATCCTTTATTAGCTTTAAGTTTAGCTATTACTATTTTCTCTTT  
TGCAGGTATTCCTCCTCTGTAGGGTTCTTTGCTAAACAGATGGTATTAAGCGCGGCTATTGATC  
AAGGTTATATCTTTTATCTTTAGTTGCAATATTAAGTGTATAGGAGGGGTTTATTATTTAAA  
TATAATTAAGAAATGTTCTTTTATTCACCTGACTATAAATTAACGAAGAAATTAATAAATAC  
TATTAATGGTCAAATTATTAATAGAAACAATAAAATATTAATGTTGAATTTAATTATACAAATGT  
AGTTATGTCTAGTTCTGTGGCAATAACTATTTCTACTATTACATTAGTAGTTTTATTATTCATGTTT

ATGAATAAAGAATGATTAAGTCTGGGTACTATATTGGTACAATCTTTATTTAGCTATTAATGAGTA  
GTATGACATTATTTATAGGGTTTGTATCTGTTATAGCTATTTTATTTTATAGCCATTAATTTTATATTT  
GCTCCTCATAATCCTTATCAAGAAAAATATAGTATTTTCGAGTGTGGTTTCCATAGTTTTTATAGG  
CAAAATAGAACACAATTCGGTATAAAATTCCTTATTTTTCGCTTTAGTTTATTTACTTTTATAGATTTAG  
AAATATTATTAACCTTTCCCTTTTCGCTCTTAGTGAGTATGTTAATGGTATTTATGGTCTTTTATAGTTAC  
TTTAATTTTATAGCTATAATAACTATAGGATTTATATTTGAATTAGGTAAAAGCGCTCTTAAAATA  
GACAGCAGACAAAAATTATATATACCTAAATTGAACGTTAATTACCATACAGAGTATGTTGGAAT  
AGGTAAGGTTTCTAAGTAAAGTTATAGAGGCAGAAAACCAAAAAACCTACCAAAGGGTAGCTA  
ATGGGAAGCTATTAATAAATAAAGATGATAACCTATATATAGTATAGTTACTATATATTTACTATA  
ACTAGGATTATTATATATATATATATTATCTTATTGTATATTAAGATTATTATTATTATAAGGTATA  
ATTAATATAGTATCTTATTGTATAAGAATATAATATATTAACCTATAATTAATTTTATTTTAAATTT  
TTAATTATAATTTTTTTTTTATATCTAGATGCTTACACATCTACAGATGTAGAAGAGAACAAAATAT  
TGTTGTTATAGTAGTGGATGATATAGAAAAATATTTTATATTATTTATTTTGTAGGTAGCTTTT  
GAAGTGTGATAGAGAGGATATATGGACGGTAGGAGGGTATTCATTTTAATGAACAGTGGATA  
GTTTAAATTAACCTAGTTATAGTTTATGAATTTAAATTATAATTATATTAATGTAGGTATGATAGA  
ATTATGTATTGATCCTTAAGAGTTAAGAGAGATACGCCACGTATAATACATATTGGTTTAGGGT  
TGAGTATATATACTTAAGAGTTAAGAATATATATATACAATATATAATAAATATAGTAATATATTA  
ATGGTATGGACTTAACCAGGTTTATATATTATCATTTGATAAACATTAATTATAATTTTCTATTTA  
TTATTATTATTACTGTGAGATTAATAATTATTAATAATATAATATTACATAGTACGTGATATTTGG  
GGATTTTATCTTATTAATTGGCAATTAATGATTCTAATCAAATTTTATTCTCTTTAGTTTAAATGGTA  
GAACAATGATCTTCTAATTCATTGGTTTTAGTTTCGATTCTAAAAAGAGATGAGTAAATAATTTTCT  
AGATCAGAAATACTACTTTTAACTACAAAAAGCTTACGCTTTTAAACATTTTTTGTAAATAACA  
ACTATTGTTAATATTTGGCTGTCTATTGGTTTAACTACAATTACAAAATTTTTCAATTTTATAAT  
ATAAATTTAAATGAGAATATTAATAAAGTCATTCAATTATTAATAATTAGTGAATTCTTACCTTATCGA  
TGCGTCACAACCAAGTAACATTAGTTACTTGTGAAATTTTGGTTCATTATTAGCTGTTTGTTTAAT  
AGTACAAATTATTACCGGTATTACATTAGCTATGCATTATAGTCCTAGTGTAATGGAAGCTTTTAA  
CTCAATAGAGCATATAATGAGAGATGTTAATAACGGGTGATTAGTTCGTTATCTACATAGTAATA  
CAGCTTCTGCTTTCTTTTCTTAGTGATTATACACATAGGAAGAGGTATATATTACGGATCATATA  
GAGCTCCTCGTACTTTAGTTTGAGCTATTGGTACTGTTATATTAATTAATGATGGCTATCGGTT  
TCCTAGGTATGTTTTACCTTATGGACAGATGTCATTATGAGGTGCTACAGTTATTACTAATCTTA  
TTAGTGCTATACCTGAATAGGGCAAGATATTGTTGAATTCATTTGAGGTGGTTTTCTGTAAATA  
ATGCCACTTTAAACAGATTTTTGCATTACATTTGTATTGCCTTTTGTATTAGCTGCTTTAGTTTAA  
ATGCACTTAATTGCACTTCATGATACTGCTGGTTCAAGCAATCCTCTTGGTGTTTACAGGTAATTAC  
GATAGAATTACATTTGCTCCATATTTTTATTTAAAGATTTAATTACTATTTTATATTTATTTTGT  
TTAAGTGCTTTTGTATTCTTTATGCCTAATGTTTTAGGGGATAGTGATAATTATATTATGGCTAATC  
CTATGCAAACCTCCTGCTGCTATTGTACCTGAATGATACTTATTACCTTTCTATGCTATTTTAAAGATC  
TATACCTAATAAATTATTAGGTGTTATAGCGATGTTTAGTGCTATTTTATAGCTATTATGTTATTACCT  
GTTACAGATTTAGGTAGATCTAGAGGTTTACAATTTAGACCATTTAGTAAATAGCTTTCTGAGTT  
TTTGTGCTAATTTCTTAGTTTTAATGCAATTAGGTGCTAAACACGTTGAAGATCCATTTATATTAT  
TAGGTCAATTAAGTACTGTATTATACTTTAGTTATTTTGTGCTATATTACCTTTAGCTAGTTACTT  
AGATAATAGTTTAACTGATTTATCTAATAAATCTGAATTATTTTAAATAAACTAACTAAATATAT  
TAAGATTATTATTTAATATATTTTCTATTTAAGATACTATTAATTTAGTATTTTGGGTTTTAGTTTA  
TAATTTATATTATATTATGCATTACCTCCACCTTGCTTTGTAGTAAGCTAATCTGTTATTTCTTTA  
GTTAATGGTAGAACAATGATCTTCTAATTCATTGGTTTTAGTTTGAATCTAAAAAGGAAATAAG

AAATATATTCTTATTATTACTTATATAATAATTATTTCTTAAAAATATACATTTTGCATTATAGCCGT  
TTAGCTGTATTAAAATGTAAAATGATATAAAATAGAATAAAATATTTAAATTATTCCTATGTTATATT  
ATCCTATATTGCAACCATTATCAGAAGTTGTATTAATACTTGTACCTGCCTTATTAGCTGTAGCTT  
ATGTTACAGTTGCTGAAAGAAAACTATGGCTAGTATGCAAAGAAGATTAGGTCCTAATGCTGT  
AGGTTACTATGGACTATTGCAAGCATTTGCTGATGCCTTAAAACTTTTATTAAGAATATGTAG  
CTCCTACACAATCTAATATTGTTCTTTTCTTTTAGGTCCTGTAATAACTTTAATTTTGCATTATTA  
GGTTACGCTGTTATACCCTATGGTCCTGGTTCAGGGATAAGCGACATGAATTTAGGTATATTTTA  
CATGTTAGCTGTGTCATCTTTAGCTACATACGGTATTCTATTAGCTGGTTGAAGTGCGAATAGTA  
AATACGCTTTTCTAGGTTCTCTTAGAAGTACAGCTCAATTAATTAGTTATGAATTAATATTAAGTT  
CAGCTATATTAATAGTAATTATGATAACAGGAAATTTAAATTTAACTGTTTGTACTGAATCTCAAA  
GAGCTATTTGATTTATACTACCTTTATTTCTGTGTTTATAATATTTTTCATAGGATCTATAGCTGA  
GACAAATAGAGCTCCTTTTGATTTAGCCGAGGCTAACCTGCTAATCTGGTTTGGTCTGGTTATAT  
GTCACAAATTGCTAGGAAACCTTTTTATTTAAAAACAAAAGACAATTAGCAGGAAACTTAATTT  
AACCTAATTAATAATTAGATAATTAACCTCTTCATAGACTAAACGTGACAATTTAATATATATA  
TATATTTATTTATATATATGATTAATAAGATATAGTCAATCATCGGTGTGAATCGACTTAAAAAA  
AAAAGCACATGGGTAAACCCATCTCCCTTATTAGGGGAATCAGAACTTGTTAGTGGGTTTCAT  
GACAGAGCATGCTGCCGTAGTTTTCGTATTCTTCTTTTAGCTGAGTACGGTAGTATTGTACTAAT  
GTGTATTTTAACTAGTATATTATTTATTGGTGGTTACTTATTATTTGAAATATCCTATGTTTTACTG  
TGGTAAATTATATTTTCTTTGAATTATTCTTTATAGACTGAGTAACATTTGTAGAGGTACAATCTTT  
ATACACTGATTTTTTAAATAATTCTATCATTGAAGGATTATTATATGGGTTTAACTAGGATTA  
AAGTTCTTTAATGATATTCACATTTATTTGAGCTAGAGCATCCTTCCCTAGAATACGATTTGATCA  
ACTAATGGGCTTCTGTTGAACAGTTTTATTACCTATTAATTTTGCAATTATTATATTAGTACCTTGT  
GTTTTATATAGTTTTAACTTATTACCTGTAAATATACCATTGTTCTAGCTCACACACCCGCCGCC  
CTACTGCCACAAGGCTACAGTACATATGAGGAGGGGAATAAGATCTAGAATACTATCCTAGTTA  
ATAATTACACTTAATAGTATACTAAATAGACCATCTATCATACTCGAGAATAGTGATAGTGTAAT  
TATACACTATTTTAACTGTATTCTACACTATTAGCATATTATTATCTTTATATGATAATAATTTTATA  
ACTTAATTTATTAGGTTACATTAACAAAAAATTCGTTAACTTTTTTCACCACTTTTAAACAAAAT  
ACGAATTTTA

>YN427

ATAACAATTCTAAAGAACATAAAGAGTTATTAGATAAAAAATAATTCACCTATACAGTTAATAAAT  
CAACTTAAAGGGTATTTTTTCATAAATCCTTATTAGCTTTAAGTTTAGCTATTACTATTTTCTCTTT  
TGCAGGTATTCTCCTCTTGTAGGGTTCTTTGCTAAACAGATGGTATTAAGCGCGGCTATTGATC  
AAGGTTATATCTTTTATCTTTAGTTGCAATATTAAGTGTATAGGAGGGGTTTATTATTTAAA  
TATAATTAAGAAATGTTCTTTTATTCACCTGACTATAAATTAACGAAGAAATTAATAATAC  
TATTAATGGTCAAATTATTAATAGAAACAATAAAATATTAATGTTGAATTTAATTATACAAATGT  
AGTTATGTCTAGTTCTGTGGCAATAACTATTTCTACTATTACATTAGTAGTTTTATTATTCATGTTT  
ATGAATAAAGAATGATTAAGTCTGGGTACTATATTGGTACAATCTTTATTTAGCTATTAATGAGTA  
GTATGACATTATTTATAGGGTTGTATCTGTTATAGCTATTTTATTTTAGCCATTAATTTATATTT  
GCTCCTCATAATCCTTATCAAGAAAAATATAGTATTTTCGAGTGTGGTTCCATAGTTTTTTAGGG  
CAAAATAGAACACAATTCGGTATAAAATCTTTATTTTGCTTTAGTTTATTTACTTTTAGATTTAG  
AAATATTATTAACTTTCCCTTTCGCTCTTAGTGAGTATGTTAATGGTATTTATGGTCTTTTAGTTAC  
TTTAATTTTATAGCTATAATAACTATAGGATTTATATTTGAATTAGGTAAAAGCGCTCTTAAATA  
GACAGCAGACAAAAATTATATATACCTAAATTGAACGTTAATTACCATACAGAGTATGTTGGAAT  
AGGTAAGGTTTCTAAGTAAAGTTATAGAGGCAGAAAACCAAAAAACCTACCAAGGGTAGCTA

ATGGGAAGCTATTA AAAAATAAAAGATGATAACCTATATATAGTATAGTTACTATATATTTACTATA  
ACTAGGATTATTATATATATATATATTATCTTATTGTATATTAAGATTATTATTATAAGGTATA  
ATTAATATAGTATCTTATTGTATAAGAATATAATATATTAACCTATAATTAATTTTATTTTTAATTT  
TTAATTATAATTTTTTTTTATATCTAGATGCTTACACATCTACAGATGTAGAAGAGAACAAAATAT  
TGTTGTTATAGTAGTGGATGATATAGAAAAATATTTTTATATTATTTATTTTTGTTAGGTAGCTTTT  
GAAGTGTTTGATAGAGAGGATATATGGACGGTAGGAGGGTATTCATTTTAATGAACAGTGGATA  
GTTTAAATTAACCTAGTTATAGTTTATGAATTTAAATTATAATTATATTAATGTAGGTTATGATAGA  
ATTATGTATTGATCCTTAAGAGTTAAGAGAGATACGCCACGTATAATACATATTGGTTTAGGGT  
TGAGTATATATACTTAAGAGTTAAGAATATATATATACAATATATAATAAATATAGTAATATATTA  
ATGGTATGGACTTAACCAGGTTTATATATTATCATTTGATAAACATTAATTATAATTTTTCTATTTA  
TTATTATTATTACTGTGAGATTAATAATTATTA AAAATATAATATTACATAGTACGTGATATTTGG  
GGATTTTATCTTATTAATTGGCAATTAATGATTCTAATCAAATTTTATTCTCTTTAGTTTAATGGTA  
GAACAATGATCTTCTAATTCATTGGTTTTAGTTTCGATTCTAAAAAGAGATGAGTAAATAATTTTCT  
AGATCAGAAATACTACTTTTAACTACAAAAAGCTTACGCTTTTAAACATTTTTTTGATAAATAACA  
ACTATTGTTAATATTTGGCTGTCTATTGGTTTAACTAACAATTACAAAATTTTTCAATTTTTATAAT  
ATAAATTTAAATGAGAATATTA AAAAGTCATTCATTATTA AAATTAGTGAATTCCTACCTTATCGA  
TGCGTCACAACCAAGTAACATTAGTTACTTGTGAAATTTTGGTTCATTATTAGCTGTTTGTTAAT  
AGTACAAATTATTACCGGTATTACATTAGCTATGCATTATAGTCCTAGTGAATGGAAGCTTTTAA  
CTCAATAGAGCATATAATGAGAGATGTTAATAACGGGTGATTAGTTCGTTATCTACATAGTAATA  
CAGCTTCTGCTTTCTTTTTCTTAGTGTATTTACACATAGGAAGAGGTATATATTACGGATCATATA  
GAGCTCCTCGTACTTTAGTTTGAGCTATTGGTACTGTTATATTAATTAATGATGGCTATCGGTT  
TCCTAGGTTATGTTTTACCTTATGGACAGATGTCATTATGAGGTGCTACAGTTATTACTAATCTTA  
TTAGTGCTATACCTGAATAGGGCAAGATATTGTTGAATTCATTTGAGGTGGTTTTCTGTTAATA  
ATGCCACTTTAAACAGATTTTTTGCAATTACATTTGTATTGCCTTTTGTATTAGCTGCTTTAGTTTAA  
ATGCACTTAATTGCACTTCATGATACTGCTGGTTCAAGCAATCCTCTGGTGTTTCAGGTAATTAC  
GATAGAATTACATTTGCTCCATATTTTTATTTAAAGATTTAATTACTATTTTTATATTTATTTTTGTA  
TTAAGTGCTTTTGTATTCTTTATGCCTAATGTTTTAGGGGATAGTGATAATTATATTATGGCTAATC  
CTATGCCAACTCCTGCTGCTATTGTACCTGAATGATACTTATTACCTTTCTATGCTATTTTAAAGATC  
TATACCTAATAAATTATTAGGTGTTATAGCGATGTTTAGTGCTATTTTAGCTATTATGTTATTACCT  
GTTACAGATTTAGGTAGATCTAGAGGTTTACAATTTAGACCATTTAGTAAATAGCTTTCTGAGTT  
TTTGTTGCTAATTTCTTAGTTTAAATGCAATTAGGTGCTAAACACGTTGAAGATCCATTTATATTAT  
TAGGTCAATTAAGTACTGTATTATACTTTAGTTATTTTGTTGCTATATTACCTTTAGCTAGTTACTT  
AGATAATAGTTTAACTGATTTATCTAATAAATCTGAATTATTTTAAATAAACTAACTAAATATAT  
TAAGATTATTATTTAATATATTTTCTATTTAAGATACTATTAATTTAGTATTTTGGGTTTTCAGTTTA  
TAATTTATATTATATTATGCATTACCCTCCACCTTGCTTTGTAGTAAGCTAATCTGTTATTTCTTTA  
GTTTAATGGTAGAACAATGATCTTCTAATTCATTGGTTTTAGTTTGAATCTAAAAAGGAAATAAG  
AAATATATTCTTATTATTACTTATATAATAATTATTTCTTAAAAATATACATTTTGCATTATAGCCGT  
TTAGCTGTATTAAATGTAAATGATATAAAATAGAATAAATATTTAAATTATTCCTATGTTATATT  
ATCCTATATTGCAACCATTATCAGAAGTTGTATTAATACTTGTACCTGCCTTATTAGCTGTAGCTT  
ATGTTACAGTTGCTGAAAGAAAACTATGGCTAGTATGCAAAGAAGATTAGGTCCTAATGCTGT  
AGGTTACTATGGACTATTGCAAGCATTTGCTGATGCCTTAAACTTTTATTAAGAATATGTAG  
CTCCTACACAATCTAATATTGTTCTTTTCTTTTAGGTCCTGTAATAACTTTAATTTTTGCATTATTA  
GGTTACGCTGTTATACCCTATGGTCCTGGTTCAGGGATAAGCGACATGAATTTAGGTATATTTTA  
CATGTTAGCTGTGTCATCTTTAGCTACATACGGTATTCTATTAGCTGGTTGAAGTGCGAATAGTA

AATACGCTTTTCTAGGTTCTCTTAGAAGTACAGCTCAATTAATTAGTTATGAATTAATATTAAGTT  
CAGCTATATTAATAGTAATTATGATAACAGGAAATTTAAATTTAACTGTTTGTACTGAATCTCAAA  
GAGCTATTTGATTTATACTACCTTTATTTCCCTGTGTTTATAATATTTTTCATAGGATCTATAGCTGA  
GACAAATAGAGCTCCTTTTGATTTAGCCGAGGCTAACCTGCTAATCTGGTTTGGTCTGGTTATAT  
GTCACAAATTGCTAGGAAACCTTTTTATTTTAAAAACAAAAGACAATTAGCAGGAACTTAATTT  
AACCTAATTAATAATATTAGATAATTAACTCTTCATAGACTAAACGTGACAATTTAATATATATA  
TATATTTATTTATATATATGATTAAATAAGATATAGTCAATCATCGGTGTGAATCGACTTAAAAAA  
AAAAGCACATGGGTAAACCCATCTCCCCTTATTAGGGGAATCAGAACTTGTTAGTGGGTTTCAT  
GACAGAGCATGCTGCCGTAGTTTTCGTATTCTTCTTTTGTAGCTGAGTACGGTAGTATTGTACTAAT  
GTGTATTTTAACTAGTATATTATTTATTGGTGGTTACTTATTATTTGAAATATCCTATGTTTTTACTG  
TGGTAAATTATATTTTCTTTGAATTATTCTTTATAGACTGAGTAACATTTGTAGAGGTACAATCTTT  
ATACACTGATTTTTTAAATAATTCTATCATTGAAGGATTATTATATGGGTTTAACTAGGATTA  
AAGTTCTTTAATGATATTCACATTTATTTGAGCTAGAGCATCCTTCCCTAGAATACGATTTGATCA  
ACTAATGGGCTTCTGTTGAACAGTTTTATTACCTATTAATTTTGAATTATTATATTAGTACCTTGT  
GTTTTATATAGTTTTAACTTATTACCTGTAAATATACCATTGTTCTAGCTCACACACCCGCCGCC  
CTACTGCCACAAGGCTACAGTACATATGAGGAGGGGAATAAGATCTAGAATACTATCCTAGTTA  
ATAATTACACTTAATAGTATACTAAATAGACCATCTATCATACTCGAGAATAGTGATAGTGAAT  
TATACACTATTTTAACTGTATTCTACACTATTAGCATATTATTATCTTTATATGATAATAATTTTATA  
ACTTAATTTATTAGGTTACATTAACAAAAAATTCGTTAACTTTTTTCACCACTTTTTAATACAAAAT  
ACGAATTTTA

>YN435

ATAACAATTCTAAAGAACATAAAGAGTTATTAGATAAAAAATAATTCACCTATACAGTTAATAAAT  
CAACTTAAAGGGTATTTTTTCATAAATCCTTTATTAGCTTTAAGTTTAGCTATTACTATTTTCTCTTT  
TGCAGGTATTCTCCTCTTGTAGGGTCTTTGCTAAACAGATGGTATTAAGCGCGGCTATTGATC  
AAGGTTATATCTTTTTATCTTTAGTTGCAATATTAAGTGTATAGGAGGGGTTTATTATTTAAA  
TATAATTAAGAAATGTTCTTTTATTCACCTGACTATAAATTAACGAAGAAATTAATAAATAC  
TATTAATGGTCAAATTATTAATAGAAACAATAAAATATTAATGTTGAATTTAATTATACAAATGT  
AGTTATGTCTAGTTCTGTGGCAATAACTATTTCTACTATTACATTAGTAGTTTTATTATTCATGTTT  
ATGAATAAAGAATGATTAAGTCTGGGTACTATATTGGTACAATCTTTATTTAGCTATTAATGAGTA  
GTATGACATTATTTATAGGGTTGTATCTGTTATAGCTATTTTATTTTGTAGCCATTAATTTATATTT  
GCTCCTCATAATCCTTATCAAGAAAAATATAGTATTTTCGAGTGTGGTTTCCATAGTTTTTTAGGG  
CAAAATAGAACACAATTCGGTATAAAATTCCTTATTTTTGCTTTAGTTTATTTACTTTTAGATTTAG  
AAATATTATTAACTTTCCCTTTCGCTCTTAGTGAGTATGTTAATGGTATTTATGGTCTTTTAGTTAC  
TTTAATTTTTTATAGCTATAATAACTATAGGATTTATATTTGAATTAGGTAAAAGCGCTCTTAAATA  
GACAGCAGACAAAAATTATATATACCTAAATTGAACGTTAATTACCATACAGAGTATGTTGGAAT  
AGGTAAGGTTTCTAAGTAAAGTTATAGAGGCAGAAAACCAAAAAACCTACCAAAGGGTAGCTA  
ATGGGAAGCTATTAATAAATAAAGATGATAACCTATATATAGTATAGTTACTATATATTTACTATA  
ACTAGGATTATTATATATATATATATTATCTTATTGTATATTAAGATTATTATTATAAGGTATA  
ATTAATATAGTATCTTATTGTATAAGAATATAATATATTAACCTATAATTAATTTTATTTTTAATTT  
TTAATTATAATTTTTTTTTATATCTAGATGCTTACACATCTACAGATGTAGAAGAGAACAAAATAT  
TGTTGTTATAGTAGTGATATAGAAAAATATTTTTATATTATTTATTTTGTAGGTAGCTTTT  
GAAGTGTGATAGAGAGGATATATGGACGGTAGGAGGGTATTCATTTAATGAACAGTGGATA  
GTTTAAATTAACCTAGTTATAGTTTATGAATTTAAATTATAATTATTAATGTAGGTTATGATAGA  
ATTATGTATTGATCCTTAAGAGTTAAGAGAGATACGCCACGTATAATACATATTGGTTTAGGGT

TGAGTATATATACTTAAGAGTTAAGAATATATATATACAATATATAATAAATATAGTAATATATTA  
ATGGTATGGACTTAACCAGGTTTATATATTATCATTTGATAAACATTAATTATAATTTTTCTATTTA  
TTATTATTATTACTGTGAGATTAATAATTATTAATAATATTACATAGTACGTGATATTTGG  
GGATTTTATCTTATTAATTGGCAATTAATGATTCTAATCAAATTTTATTCTCTTTAGTTTAATGGTA  
GAACAATGATCTTCTAATTCATTGGTTTTAGTTCGATTCTAAAAAGAGATGAGTAAATAATTTTCT  
AGATCAGAAATACTACTTTTAACTACAAAAAGCTTACGCTTTTTAACATTTTTTGATAAATAACA  
ACTATTGTTAATATTTGGCTGTCTATTGGTTTAACTAACAATTACAAAATTTTTCAATTTTTATAAT  
ATAAATTTAAATGAGAATATTAATAAGTCATTATTATTAATAATTAGTGAATCTTACCTTATCGA  
TGCGTCACAACCAAGTAACATTAGTTACTTGTGAAATTTTGGTTCATTATTAGCTGTTTGTTAAT  
AGTACAAATTATTACCGGTATTACATTAGCTATGCATTATAGTCCTAGTGAATGGAAGCTTTTAA  
CTCAATAGAGCATATAATGAGAGATGTTAATAACGGGTGATTAGTTCGTTATCTACATAGTAATA  
CAGCTTCTGCTTTCTTTTTCTTAGTGTATTTACACATAGGAAGAGGTATATATTACGGATCATATA  
GAGCTCCTCGTACTTTAGTTTGAGCTATTGGTACTGTTATTAATTAATGATGGCTATCGGTT  
TCCTAGGTTATGTTTTACCTTATGGACAGATGTCATTATGAGGTGCTACAGTTATTACTAATCTTA  
TTAGTGCTATACCTGAATAGGGCAAGATATTGTTGAATTCATTGAGGTGGTTTTCTGTTAATA  
ATGCCACTTTAAACAGATTTTTGCATTACATTTGTATTGCCTTTGTATTAGCTGCTTAGTTTTA  
ATGCACTTAATTGCACTTCATGATACTGCTGGTTCAAGCAATCCTCTTGGTGTTTCAGGTAATTAC  
GATAGAATTACATTTGCTCCATATTTTTATTTAAAGATTTAATTACTATTTTTATTTATTTTTGTA  
TTAAGTGCTTTTGATTCTTTATGCCTAATGTTTTAGGGGATAGTGATAATTATATTATGGCTAATC  
CTATGCCAACTCCTGCTGCTATTGTACCTGAATGATACTTATTACCTTTCTATGCTATTTTAAGATC  
TATACCTAATAAATTATTAGGTGTTATAGCGATGTTTAGTGCTATTTAGCTATTATGTTATTACCT  
GTTACAGATTTAGGTAGATCTAGAGGTTTACAATTTAGACCATTTAGTAAATAGCTTTCTGAGTT  
TTTGTTGCTAATTTCTTAGTTTTAATGCAATTAGGTGCTAAACACGTTGAAGATCCATTATATTAT  
TAGGTCAATTAAGTACTGTATTATACTTTAGTTATTTTTGTTGCTATATTACCTTTAGCTAGTTACTT  
AGATAATAGTTTAACTGATTTATCTAATAAATCTGAATTATTTTAAATAAACTAACTAAATATAT  
TAAGATTATTATTTAATATATTTTCTATTTAAGATACTATTAATTTAGTATTTTGGGTTTTCAGTTTA  
TAATTTATATTATATTATGCATTACCCTCCACCTTGCTTTGTAGTAAGCTAATCTGTTATTTCTTTA  
GTTTAATGGTAGAACAATGATCTTCTAATTCATTGGTTTTAGTTCGAATCTAAAAAGGAAATAAG  
AAATATATTCTTATTATTACTTATATAATAATTATTTCTTAAAAATATACATTTTGCATTATAGCCGT  
TTAGCTGTATTAAATGTAAATGATATAAAATAGAATAAATATTTAAATTATTCCTATGTTATATT  
ATCCTATATTGCAACCATTATCAGAAGTTGATTAATACTTGTACCTGCCTTATTAGCTGTAGCTT  
ATGTTACAGTTGCTGAAAGAAAACTATGGCTAGTATGCAAAGAAGATTAGGTCCTAATGCTGT  
AGGTTACTATGGACTATTGCAAGCATTTGCTGATGCCTTAAACTTTTTATTAAGAATATGTAG  
CTCCTACACAATCTAATATTGTTCTTTCTTTTAGGTCCTGTAATAACTTTAATTTTTGCATTATTA  
GGTTACGCTGTTATACCCTATGGTCCTGGTTCAGGGATAAGCGACATGAATTTAGGTATATTTTA  
CATGTTAGCTGTGTCATCTTTAGCTACATACGGTATTCTATTAGCTGGTTGAAGTGCGAATAGTA  
AATACGCTTTTCTAGGTTCTCTTAGAAGTACAGCTCAATTAATTAGTTATGAATTAATTAAGTT  
CAGCTATATTAATAGTAATTATGATAACAGGAAATTTAAATTTAACTGTTTGTACTGAATCTCAAA  
GAGCTATTTGATTTATACTACCTTTATTTCTGTGTTTATAATTTTTTCATAGGATCTATAGCTGA  
GACAAATAGAGCTCCTTTGATTTAGCCGAGGCTAACCTGCTAATCTGGTTTGGTCTGGTTATAT  
GTCACAAATTGCTAGGAAACCTTTTTATTTAAAAACAAAAGACAATTAGCAGGAACTTAATTT  
AACCTAATTAATAATATTAGATAATTAACTCTTCATAGACTAAACGTGACAATTTAATATATATA  
TATATTTATTTATATATATGATTAAATAAGATATAGTCAATCATCGGTGTGAATCGACTTAAAAAA  
AAAAGCACATGGGTAAACCCATCTCCCCTTATTAGGGGAATCAGAACTTGTTAGTGGGTTTAT

GACAGAGCATGCTGCCGTAGTTTTCGTATTCTTCTTTTAGCTGAGTACGGTAGTATTGTACTAAT  
GTGTATTTAACTAGTATATTATTTATTGGTGGTTACTTATTATTTGAAATATCCTATGTTTTACTG  
TGGTAAATTATATTTTCTTTGAATTATTCTTTATAGACTGAGTAACATTTGTAGAGGTACAATCTTT  
ATACACTGATTTTTTAAATAATTCTATCATTGAAGGATTATTATATGGGTTTAATCTAGGATTAAA  
AAGTTCTTTAATGATATTCACATTTATTTGAGCTAGAGCATCCTTCCCTAGAATACGATTTGATCA  
ACTAATGGGCTTCTGTTGAACAGTTTTATTACCTATTAATTTTGCAATTATTATATTAGTACCTTGT  
GTTTTATATAGTTTTAACTTATTACCTGTAAATATACCATTGTTCTAGCTCACACACCCGCCGCC  
CTACTGCCACAAGGCTACAGTACATATGAGGAGGGGAATAAGATCTAGAATACTATCCTAGTTA  
ATAATTACACTTAATAGTATACTAAATAGACCATCTATCATACTCGAGAATAGTGATAGTGTAAT  
TATACACTATTTTAACTGTATTCTACACTATTAGCATATTATTATCTTTATATGATAATAATTTATA  
ACTTAATTTATTAGGTTACATTAACAAAAAATTCGTTAACTTTTTTCACCACTTTTAAATACAAAAT  
ACGAATTTTA

>YN442

ATAACAATTCTAAAGAACATAAAGAGTTATTAGATAAAAAATAATTCACCTATACAGTTAATAAAT  
CAACTTAAAGGGTATTTTTTCATAAATCCTTTATTAGCTTTAAGTTTAGCTATTACTATTTTCTCTTT  
TGCAGGTATTCCTCCTCTGTAGGGTCTTTGCTAAACAGATGGTATTAAGCGCGGCTATTGATC  
AAGGTTATATCTTTTATCTTTAGTTGCAATATTAAGTGTATAGGAGGGGTTTATTATTTAAA  
TATAATTAAGAAATGTTCTTTTATTCACCTGACTATAAATTAACGAAGAAATTAATAAATAC  
TATTAATGGTCAAATTATTAATAGAAACAATAAAATATTAAATGTTGAATTTAATTATACAAATGT  
AGTTATGTCTAGTTCTGTGGCAATAACTATTTCTACTATTACATTAGTAGTTTTATTATTCATGTTT  
ATGAATAAAGAATGATTAAGTCTGGGTACTATATTGGTACAATCTTTATTTAGCTATTAATGAGTA  
GTATGACATTATTTATAGGGTTTGTATCTGTTATAGCTATTTTATTTTAGCCATTAATTTATATTT  
GCTCCTCATAATCCTTATCAAGAAAAATATAGTATTTTCGAGTGTGGTTTCCATAGTTTTTAGGG  
CAAAATAGAACACAATTCGGTATAAAATCTTTATTTTTGCTTTAGTTTATTTACTTTTAGATTTAG  
AAATATTATTAACTTTCCCTTTCGCTCTTAGTGAGTATGTTAATGGTATTTATGGTCTTTTAGTTAC  
TTTAATTTTATAGCTATAATAACTATAGGATTTATATTTGAATTAGGTAAAAGCGCTCTTAAATA  
GACAGCAGACAAAAATTATATATACCTAAATTGAACGTTAATTACCATACAGAGTATGTTGGAAT  
AGGTAAGGTTTCTAAGTAAAGTTATAGAGGCAGAAAACCAAAAAACCTACCAAAGGGTAGCTA  
ATGGGAAGCTATTAATAAATAAAGATGATAACCTATATATAGTATAGTTACTATATATTTACTATA  
ACTAGGATTATTATATATATATATATTATCTTATTGTATATTAAGATTATTATTATAAGGTATA  
ATTAATATAGTATCTTATTGTATAAGAATATAATATATTAACCTATAATTAATTTTATTTTAAATTT  
TTAATTATAATTTTTTTTTATATCTAGATGCTTACACATCTACAGATGTAGAAGAGAACAAAATAT  
TGTTGTTATAGTAGTGGATGATATAGAAAAATATTTTTATATTATTTATTTTGTAGGTAGCTTTT  
GAAGTGTTGATAGAGAGGATATATGGACGGTAGGAGGGTATTCATTTTAATGAACAGTGGATA  
GTTTAAATTAACCTAGTTATAGTTTATGAATTTAAATTATAATTATATTAATGTAGGTATGATAGA  
ATTATGTATTGATCCTTAAGAGTTAAGAGAGATACGCCACGTATAATACATATTGGTTTAGGGT  
TGAGTATATATACTTAAGAGTTAAGAATATATATATACAATATATAATAAATATAGTAATATATTA  
ATGGTATGGACTTAACCAGGTTTATATATTATCATTTGATAAACATTAATTATAATTTTCTATTTA  
TTATTATTATTACTGTGAGATTAATAATTATTAATAATATTACATAGTACGTGATATTTGG  
GGATTTTATCTTATTAATTGGCAATTAATGATTCTAATCAAATTTTATTCTCTTTAGTTTAAATGGTA  
GAACAATGATCTTCTAATTCATTGGTTTTAGTTTCGATTCTAAAAAGAGATGAGTAAATAATTTTCT  
AGATCAGAAATACTACTTTTAACTACAAAAAGCTTACGCTTTTTAACATTTTTTTGATAAATAACA  
ACTATTGTTAATATTTGGCTGTCTATTGGTTTAACTACAATTACAAAATTTTTCAATTTTTATAAT  
ATAAATTTAAATGAGAATATTAATAAAGTCATTCAATTATTAATAATTAGTGAATCTTACCTTATCGA

TGCGTCACAACCAAGTAACATTAGTTACTTGTGAAATTTTGGTTCATTATTAGCTGTTTGTTAAT  
AGTACAAATTATTACCGGTATTACATTAGCTATGCATTATAGTCCTAGTGTAATGGAAGCTTTTAA  
CTCAATAGAGCATATAATGAGAGATGTTAATAACGGGTGATTAGTTCGTTATCTACATAGTAATA  
CAGCTTCTGCTTTCTTTTCTTAGTGATTTACACATAGGAAGAGGTATATATTACGGATCATATA  
GAGCTCCTCGTACTTTAGTTTGAGCTATTGGTACTGTTATATTAATTAATGATGGCTATCGGT  
TCCTAGGTTATGTTTACCTTATGGACAGATGTCATTATGAGGTGCTACAGTTACTAATCTTA  
TTAGTGCTATACCTGAATAGGGCAAGATATTGTTGAATTCATTTGAGGTGGTTTTCTGTTAATA  
ATGCCACTTTAAACAGATTTTTGCATTACATTTGTATTGCCTTTGTATTAGCTGCTTAGTTTTA  
ATGCACTTAATTGCACTTCATGATACTGCTGGTTCAAGCAATCCTCTGGTGTTTCAGGTAATTAC  
GATAGAATTACATTTGCTCCATATTTTTATTTAAAGATTTAATTACTATTTTTATATTTATTTTGT  
TTAAGTGCTTTGTATTCTTTATGCCTAATGTTTAGGGGATAGTGATAATTATATTATGGCTAATC  
CTATGCAAACCTCCTGCTGCTATTGTACCTGAATGATACTTATTACCTTTCTATGCTATTTAAGATC  
TATACCTAATAAATTATTAGGTGTTATAGCGATGTTTAGTGCTATTTAGCTATTATGTTATTACCT  
GTTACAGATTTAGGTAGATCTAGAGGTTTACAATTTAGACCATTTAGTAAATAGCTTTCTGAGTT  
TTTGTTGCTAATTTCTTAGTTTTAATGCAATTAGGTGCTAAACACGTTGAAGATCCATTTATATTAT  
TAGGTCAATTAAGTACTGTATTATACTTTAGTTATTTTGTGCTATATTACCTTTAGCTAGTTACTT  
AGATAATAGTTTAACTGATTTATCTAATAAATCTGAATTATTTTAAATAAAACTAACTAAATATAT  
TAAGATTATTATTTAATATATTTTCTATTTAAGATACTATTAATTTAGTATTTTGGGTTTTAGTTTA  
TAATTTATATTATATTATGCATTACCCTCCACCTTGCTTTGTAGTAAGCTAATCTGTTATTTCTTTA  
GTTTAATGGTAGAACAATGATCTTCTAATTCATTGGTTTTAGTTTGAATCTAAAAAGGAAATAAG  
AAATATATTCTTATTATTACTTATATAATAATTATTTCTTAAAAATATACATTTTGCAATTATAGCCGT  
TTAGCTGTATTAAATGTAAATGATATAAAATAGAATAAATATTTAAATTATTCCTATGTTATATT  
ATCCTATATTGCAACCATTATCAGAAGTTGTATTAATACTTGTACCTGCCTTATTAGCTGTAGCTT  
ATGTTACAGTTGCTGAAAGAAAAACTATGGCTAGTATGCAAAGAAGATTAGGTCCTAATGCTGT  
AGGTTACTATGGACTATTGCAAGCATTGCTGATGCCTTAAACTTTTATTTAAAGAATATGTAG  
CTCCTACACAATCTAATATTGTTCTTTTCTTTTAGGTCTGTAAATAACTTTAATTTTGCATTATTA  
GGTTACGCTGTTATACCCTATGGTCCTGGTTCAGGGATAAGCGACATGAATTTAGGTATATTTTA  
CATGTTAGCTGTGTCATCTTTAGCTACATACGGTATTCTATTAGCTGGTTGAAGTGCGAATAGTA  
AATACGCTTTTCTAGGTTCTCTTAGAAGTACAGCTCAATTAATTAGTTATGAATTAATATTAAGTT  
CAGCTATATTAATAGTAATTATGATAACAGGAAATTTAAATTTAACTGTTTGTACTGAATCTCAAA  
GAGCTATTTGATTTATACTACCTTTATTTCTGTGTTTATAATATTTTTCATAGGATCTATAGCTGA  
GACAAATAGAGCTCCTTTGATTTAGCCGAGGCTAACCTGCTAATCTGGTTTGGTCTGGTTATAT  
GTCACAAATTGCTAGGAAACCTTTTTATTTAAAAACAAAAGACAATTAGCAGGAAACTTAATTT  
AACCTAATTAATAAATTATTAGATAAATAAATCTTTCATAGACTAAACGTGACAATTTAATATATATA  
TATATTTATTTATATATATGATTAATAAAGATATAGTCAATCATCGGTGTGAATCGACTTAAAAAA  
AAAAGCACATGGGTAAACCCATCTCCCCTTATTAGGGGAATCAGAACTTGTTAGTGGGTTTCAT  
GACAGAGCATGCTGCCGTAGTTTTCGTATTCTTCTTTTAGCTGAGTACGGTAGTATTGTACTAAT  
GTGTATTTTAACTAGTATATTATTTATTGGTGGTTACTTATTATTTGAAATATCCTATGTTTTACTG  
TGGTAAATTATATTTTCTTTGAATTATCTTTATAGACTGAGTAACATTTGTAGAGGTACAATCTTT  
ATACACTGATTTTTTAAATAATTCTATCATTGAAGGATTATTATATGGGTTAATCTAGGATTAAA  
AAGTTCTTTAATGATATTCACATTTATTTGAGCTAGAGCATCCTTCCCTAGAATACGATTTGATCA  
ACTAATGGGCTTCTGTTGAACAGTTTTATTACCTATTAATTTTGAATTATTATATTAGTACCTTGT  
GTTTTATATAGTTTTAACTTATTACCTGTAAATATACCATTGTTCTAGCTCACACACCCGCCGCC  
CTACTGCCACAAGGCTACAGTACATATGAGGAGGGGAAGTAAAGATCTAGAAGTATCCTAGTTA

ATAATTACACTTAATAGTATACTAAATAGACCATCTATCATACTCGAGAATAGTGATAGTGTAAT  
TATACACTATTTTAACTGTATTCTACACTATTAGCATATTATTATCTTTATATGATAATAATTTTATA  
ACTTAATTTATTAGGTTACATTAACAAAAAATTCGTTAACTTTTTTCACCACTTTTAAATACAAAAT  
ACGAATTTTA

>YN455

ATAACAATTCTAAAGAACATAAAGAGTTATTAGATAAAAAATAATTCACCTATACAGTTAATAAAT  
CAACTTAAAGGGTATTTTTTCATAAATCCTTTATTAGCTTTAAGTTTAGCTATTACTATTTTCTCTTT  
TGCAGGTATTCCTCCTCTGTAGGGTTCTTTGCTAAACAGATGGTATTAAGCGCGGCTATTGATC  
AAGGTTATATCTTTTTATCTTTAGTTGCAATATTAAGTGTATAGGAGGGGTTTATTATTTAAA  
TATAATTAAGAAATGTTCTTTTATTCACCTGACTATAAATTAACGAAGAAATTAATAAATAC  
TATTAATGGTCAAATTATTAATAGAAACAATAAATATTAATGTTGAATTTAATTATACAAATGT  
AGTTATGTCTAGTTCTGTGGCAATAACTATTTCTACTATTACATTAGTAGTTTTATTATTCATGTTT  
ATGAATAAAGAATGATTAAGTCTGGGTACTATATTGGTACAATCTTTATTTAGCTATTAATGAGTA  
GTATGACATTATTTATAGGGTTTGTATCTGTTATAGCTATTTTATTTTAGCCATTAATTTTATATTT  
GCTCCTCATAATCCTTATCAAGAAAAATATAGTATTTTCGAGTGTGGTTTCCATAGTTTTTTAGGG  
CAAAATAGAACACAATTCGGTATAAAATCCTTATTTTGTCTTAGTTTATTTACTTTTAGATTTAG  
AAATATTATTAACTTCCCTTTCGCTCTTAGTGAGTATGTTAATGGTATTTATGGTCTTTTAGTTAC  
TTTAATTTTATAGCTATAATAACTATAGGATTTATATTTGAATTAGGTAAAAGCGCTCTTAAATA  
GACAGCAGACAAAAATTATATATACCTAAATTGAACGTTAATTACCATACAGAGTATGTTGGAAT  
AGGTAAGGTTTCTAAGTAAAGTTATAGAGGCAGAAAACCAAAAAACCTACCAAAGGGTAGCTA  
ATGGGAAGCTATTAATAAAGATGATAACCTATATATAGTATAGTTACTATATATTTACTATA  
ACTAGGATTATTATATATATATATTATCTTATTGTATATTAAGATTATTATTATTATAAGGTATA  
ATTAATATAGTATCTTATTGTATAAGAATATAATATATTAACCTATAATTAATTTTATTTTAAATTT  
TTAATTATAATTTTTTTTTTATATCTAGATGCTTACACATCTACAGATGTAGAAGAGAACAAAATAT  
TGTTGTTATAGTAGTGGATGATATAGAAAAATATTTTTATATTATTTATTTTGTAGGTAGCTTTT  
GAAGTGTTTGATAGAGAGGATATATGGACGGTAGGAGGGTATTCATTTTAATGAACAGTGGATA  
GTTTAAATTAACCTAGTTATAGTTTATGAATTTAAATTATAATTATATTAATGTAGGTTATGATAGA  
ATTATGTATTGATCCTTAAGAGTTAAGAGAGATACGCCACGTATAATACATATTGGTTTAGGGT  
TGAGTATATATACTTAAGAGTTAAGAATATATATATACAATATATAATAAATATAGTAATATATTA  
ATGGTATGGACTTAACCAGGTTTATATATTATCATTGATAAACATTAATTATAATTTTCTATTTA  
TTATTATTATTACTGTGAGATTAATAATTATTAATAATATTACATAGTACGTGATATTTGG  
GGATTTTATCTTATTAATTGGCAATTAATGATTCTAATCAAATTTTATTCTCTTTAGTTTAAATGGTA  
GAACAATGATCTTCTAATTCATTGGTTTTAGTTTCGATTCTAAAAAGAGATGAGTAAATAATTTTCT  
AGATCAGAAATACTACTTTTAACTACAAAAAGCTTACGCTTTTAAACATTTTTTTGATAAATAACA  
ACTATTGTTAATATTTGGCTGTCTATTGGTTTAACTAACAATTACAAAATTTTTCAATTTTTATAAT  
ATAAATTTAAATGAGAATATTAATAAGTCATTATTATTAATAATAGTGAATTCTTACCTTATCGA  
TGCCTCACAAACCAAGTAACATTAGTTACTTGTGAAATTTTGGTTCATTATTAGCTGTTTGTAAAT  
AGTACAAATTATTACCGGTATTACATTAGCTATGCATTATAGTCCTAGTGAATGGAAGCTTTTAA  
CTCAATAGAGCATATAATGAGAGATGTTAATAACGGGTGATTAGTTCGTTATCTACATAGTAATA  
CAGCTTCTGCTTTCTTTTCTTAGTGTATTTACACATAGGAAGAGGTATATATTACGGATCATATA  
GAGCTCCTCGTACTTTAGTTTGAGCTATTGGTACTGTTATATTAATTAATGATGGCTATCGGTT  
TCCTAGGTTATGTTTTACCTTATGGACAGATGTCATTATGAGGTGCTACAGTTATTACTAATCTTA  
TTAGTGCTATACCTGAATAGGGCAAGATATTGTTGAATTCATTTGAGGTGGTTTTCTGTAAATA  
ATGCCACTTAAACAGATTTTTTGCATTACATTTGTATTGCCTTTGTATTAGCTGCTTTAGTTTAA

ATGCACTTAATTGCACTTCATGATACTGCTGGTTCAAGCAATCCTCTTGGTGTTTCAGGTAATTAC  
GATAGAATTACATTTGCTCCATATTTTTATTTAAAGATTTAATTACTATTTTTATATTTATTTTTGTA  
TTAAGTGCTTTTGTAATCTTTATGCCTAATGTTTTAGGGGATAGTGATAATTATATTATGGCTAATC  
CTATGCAAACCTCCTGCTGCTATTGTACCTGAATGATACTTATTACCTTTCTATGCTATTTTAAGATC  
TATACCTAATAAATTATTAGGTGTTATAGCGATGTTTAGTGCTATTTTAGCTATTATGTTATTACCT  
GTTACAGATTTAGGTAGATCTAGAGGTTTACAATTTAGACCATTTAGTAAAATAGCTTTCTGAGTT  
TTTGTTGCTAATTTCTTAGTTTTAAATGCAATTAGGTGCTAAACACGTTGAAGATCCATTTATATTAT  
TAGGTCAATTAAGTACTGTATTATACTTTAGTTATTTTTGTTGCTATATTACCTTTAGCTAGTACTT  
AGATAATAGTTTAACTGATTTATCTAATAAATCTGAATTATTTTTAAATAAACTAACTAAATATAT  
TAAGATTATTATTTAATATATTTTCTATTTAAGATACTATTAATTTAGTATTTTGGGTTTTAGTTTA  
TAATTTATATTATATTATGCATTACCCTCCACCTTGCTTTGTAGTAAGCTAATCTGTTATTTCTTTA  
GTTTAATGGTAGAACAATGATCTTCTAATTCATTGGTTTTAGTTCGAATCTAAAAAGGAAATAAG  
AAATATATTCTTATTATTACTTATATAATAATTATTTCTTAAAAATATACATTTTGCAATTATAGCCGT  
TTAGCTGTATTAAAAATGTAAATGATATAAAATAGAATAAATATTTAAATTATTCCTATGTTATATT  
ATCCTATATTGCAACCATTATCAGAAGTTGTATTAATACTTGTACCTGCCTTATTAGCTGTAGCTT  
ATGTTACAGTTGCTGAAAGAAAACTATGGCTAGTATGCAAAGAAGATTAGGTCCTAATGCTGT  
AGGTTACTATGGACTATTGCAAGCATTTGCTGATGCCTTAAACCTTTTATTAAGAATATGTAG  
CTCCTACACAATCTAATATTGTTCTTTTCTTTTAGGTCCTGTAATAACTTTAATTTTGCATTATTA  
GGTTACGCTGTTATACCCTATGGTCCTGGTTCAGGGATAAGCGACATGAATTTAGGTATATTTTA  
CATGTTAGCTGTGTCATCTTTAGCTACATACGGTATTCTATTAGCTGGTTGAAGTGCGAATAGTA  
AATACGCTTTTCTAGGTTCTCTTAGAAGTACAGCTCAATTAATTAGTTATGAATTAATTAAGTT  
CAGCTATATTAATAGTAATTATGATAACAGGAAATTTAAATTTAACTGTTTGTACTGAATCTCAAA  
GAGCTATTTGATTTATACTACCTTTATTTCTGTGTTTATAATATTTTTCATAGGATCTATAGCTGA  
GACAAATAGAGCTCCTTTTGATTTAGCCGAGGCTAACCTGCTAATCTGGTTTGGTCTGGTTATAT  
GTCACAAATTGCTAGGAAACCTTTTTATTTAAAAACAAAAGACAATTAGCAGGAACTTAATTT  
AACCTAATTAATAATTAGATAAATAAATCTTTCATAGACTAAACGTGACAATTTAATATATATA  
TATATTTATTTATATATATGATTAATAAGATATAGTCAATCATCGGTGTGAATCGACTTAAAAAA  
AAAAGCACATGGGTAAACCCATCTCCCCTTATTAGGGGAATCAGAACTTGTTAGTGGGTTTCAT  
GACAGAGCATGCTGCCGTAGTTTTCGTATTCTTCTTTTATAGCTGAGTACGGTAGTATTGTACTAAT  
GTGTATTTTAACTAGTATATTATTTATTGGTGGTTACTTATTATTTGAAATATCCTATGTTTTACTG  
TGGTAAATTATATTTTCTTTGAATTATTCTTTATAGACTGAGTAACATTTGTAGAGGTACAATCTTT  
ATACACTGATTTTTTAAATAATTCTATCATTGAAGGATTATTATATGGGTTTAACTAGGATTA  
AAGTTCTTTAATGATATTCACATTTATTTGAGCTAGAGCATCCTTCCCTAGAATACGATTTGATCA  
ACTAATGGGCTTCTGTTGAACAGTTTTATTACCTATTAATTTTGAATTATTATATTAGTACCTTGT  
GTTTTATATAGTTTTAACTTATTACCTGTAAATATACCATTGTTCTAGCTCACACACCCGCCGCC  
CTACTGCCACAAGGCTACAGTACATATGAGGAGGGGAATAAGATCTAGAACTATCCTAGTTA  
ATAATTACACTTAATAGTATACTAAATAGACCATCTATCATACTCGAGAATAGTGATAGTGAAT  
TATACACTATTTTAACTGTATTCTACACTATTAGCATATTATTATCTTTATATGATAATAATTTTATA  
ACTTAATTTATTAGGTTACATTAACAAAAAATTCGTTAACTTTTTTACCACCTTTTAAATACAAAAT  
ACGAATTTTA

>YN460

ATAACAATTCTAAAGAACATAAAGAGTTATTAGATAAAAAATAATTCACCTATACAGTTAATAAAT  
CAACTTAAAGGTATTTTTTCATAAATCCTTTATTAGCTTTAAGTTTAGCTATTACTATTTTCTCTTT  
TGCAGGTATTCCTCCTCTTGTAGGGTTCTTTGCTAAACAGATGGTATTAAGCGCGGCTATTGATC

AAGGTTATATCTTTTTATCTTTAGTTGCAATATTAAGTGTATAGGAGGGGTTTATTATTTAAA  
TATAATTAAGAAATGTTCTTTTATTCACCTGACTATAAATTAACGAAGAAATTAATAATAC  
TATTAATGGTCAAATTATTAATAGAAACAATAAAATATTAATGTTGAATTTAATTATACAAATGT  
AGTTATGTCTAGTTCTGTGGCAATAACTATTTCTACTATTACATTAGTAGTTTTATTATTCATGTTT  
ATGAATAAAGAATGATTAAGTCTGGGTACTATATTGGTACAATCTTTATTTAGCTATTAATGAGTA  
GTATGACATTATTTATAGGGTTTGTATCTGTTATAGCTATTTTATTTTAGCCATTAATTTTATATTT  
GCTCCTCATAATCCTTATCAAGAAAAATATAGTATTTTCGAGTGTGGTTTCCATAGTTTTTTAGGG  
CAAAATAGAACACAATTCGGTATAAAATCTTTATTTTGCTTTAGTTTATTTACTTTTAGATTTAG  
AAATATTATTAACCTTTCCCTTTGCTCTTAGTGAGTATGTTAATGGTATTTATGGTCTTTTAGTTAC  
TTTAATTTTTATAGCTATAATAACTATAGGATTTATATTTGAATTAGGTAAGCGCTCTTAAATA  
GACAGCAGACAAAAATTATATACCTAAATTGAACGTTAATTACCATACAGAGTATGTTGGAAT  
AGGTAAGGTTTCTAAGTAAAGTTATAGAGGCAGAAAACCAAAAAACCTACCAAAGGGTAGCTA  
ATGGGAAGCTATTAATAAAAGATGATAACCTATATATAGTATAGTTACTATATATTTACTATA  
ACTAGGATTATTATATATATATATATTATCTTATTGTATATTAAGATTATTATTATTATAAGGTATA  
ATTAATATAGTATCTTATTGTATAAGAATATAATATATTAACCTATAATTAATTTTATTTTTAATTT  
TTAATTATAATTTTTTTTTATATCTAGATGCTTACACATCTACAGATGTAGAAGAGAACAAAATAT  
TGTTGTTATAGTAGTGGATGATATAGAAAAATATTTTTATATTATTTATTTTGTAGGTAGCTTTT  
GAAGTGTGGATAGAGAGGATATATGGACGGTAGGAGGTATTCATTTAATGAACAGTGGATA  
GTTTAAATTAACCTAGTTATAGTTTATGAATTTAAATTATAATTATATTAATGTAGGTTATGATAGA  
ATTATGTATTGATCCTTAAGAGTTAAGAGAGATACGCCACGTATAATACATATTGGTTTAGGGT  
TGAGTATATATACTTAAGAGTTAAGAATATATATACAATATATAATAAATATAGTAATATATTA  
ATGGTATGGACTTAACCAGGTTTATATATTATCATTTGATAAACATTAATTATAATTTTTCTATTTA  
TTATTATTATTACTGTGAGATTAATAATTATTAATAATATTACATAGTACGTGATATTTGG  
GGATTTTATCTTATTAATTGGCAATTAATGATTCTAATCAAATTTTATTCTCTTTAGTTTAAATGGTA  
GAACAATGATCTTCTAATTCATTGGTTTTAGTTGATTCTAAAAAGAGATGAGTAAATAATTTTCT  
AGATCAGAAATACTACTTTTAACTACAAAAGCTTACGCTTTTTAACATTTTTTGATAAATAACA  
ACTATTGTTAATATTTGGCTGTCTATTGGTTTAACTAACAATTACAAAATTTTTCAATTTTTATAAT  
ATAAATTTAAATGAGAATATTAATAAGTCATTATTATTAATAATTAGTGAATCTTACCTTATCGA  
TGCGTCACAACCAAGTAACATTAGTTACTTGTGAAATTTTGGTTCATTATTAGCTGTTTGTTAAT  
AGTACAAATTATTACCGGTATTACATTAGCTATGCATTATAGTCCTAGTGAATGGAAGCTTTTAA  
CTCAATAGAGCATATAATGAGAGATGTTAATAACGGGTGATTAGTTCGTTATCTACATAGTAATA  
CAGCTTCTGCTTTCTTTTCTTAGTGTATTTACACATAGGAAGAGGTATATATTACGGATCATATA  
GAGCTCCTCGTACTTTAGTTGAGCTATTGGTACTGTTATATTAATATTAATGATGGCTATCGGTT  
TCCTAGGTTATGTTTTACCTTATGGACAGATGTCATTATGAGGTGCTACAGTTATTACTAATCTTA  
TTAGTGCTATACCTGAATAGGGCAAGATATTGTTGAATTCATTTGAGGTGGTTTTCTGTTAATA  
ATGCCACTTTAAACAGATTTTTGCATTACATTTGTATTGCCTTTGTATTAGCTGCTTTAGTTTA  
ATGCACTTAATTGCACTTCATGATACTGCTGGTTCAAGCAATCCTCTTGGTGTTCAGGTAATTAC  
GATAGAATTACATTTGCTCCATATTTTTATTTAAAGATTTAATTACTATTTTTATTTATTTTGT  
TTAAGTGCTTTTGTATTCTTTATGCCTAATGTTTTAGGGGATAGTGATAATTATATTATGGCTAATC  
CTATGCAAACCTCCTGCTGCTATTGTACCTGAATGATACTTATTACCTTTCTATGCTATTTTAAGATC  
TATACCTAATAAATTATTAGGTGTTATAGCGATGTTTAGTGCTATTTAGCTATTATGTTATTACCT  
GTTACAGATTTAGGTAGATCTAGAGGTTTACAATTTAGACCATTTAGTAAATAGCTTTCTGAGTT  
TTTGTTGCTAATTTCTTAGTTTAAATGCAATTAGGTGCTAAACACGTTGAAGATCCATTTATATTAT  
TAGGTCAATTAAGTACTGTATTATACTTTAGTTATTTTGTGCTATATTACCTTTAGCTAGTTACTT

AGATAATAGTTTAACTGATTTATCTAATAAATCTGAATTATTTTTAAATAAACTAACTAAATATAT  
TAAGATTATTATTTAATATATTTTCTATTTAAGATACTATTAATTTAGTATTTTGGGTTTTTCAGTTTA  
TAATTTATATTATATTATGCATTACCCTCCACCTTGCTTTGTAGTAAGCTAATCTGTTATTTCCCTTA  
GTTTAATGGTAGAACAATGATCTTCTAATTCATTGGTTTTAGTTCGAATCTAAAAAGGAAATAAG  
AAATATATTCTTATTATTACTTATATAATAATTATTTCTTAAAAATATACATTTTGCATTATAGCCGT  
TTAGCTGTATTAAAATGTAAAATGATATAAAATAGAATAAATATTTAAATTATTCCTATGTTATATT  
ATCCTATATTGCAACCATTATCAGAAAGTTGTATTAATACTTGTACCTGCCTTATTAGCTGTAGCTT  
ATGTTACAGTTGCTGAAAGAAAACTATGGCTAGTATGCAAAGAAGATTAGGTCCTAATGCTGT  
AGGTTACTATGGACTATTGCAAGCATTGCTGATGCCTTAAACTTTTTATTAAGAATATGTAG  
CTCCTACACAATCTAATATTGTTCTTTTCTTTTAGGTCCTGTAATAACTTTAATTTTTGCATTATTA  
GGTTACGCTGTTATACCCTATGGTCCTGGTTCAGGGATAAGCGACATGAATTTAGGTATATTTTA  
CATGTTAGCTGTGTCATCTTTAGCTACATACGGTATTCTATTAGCTGGTTGAAGTGCGAATAGTA  
AATACGCTTTTCTAGGTTCTCTTAGAAGTACAGCTCAATTAATTAGTTATGAATTAATTAAGTT  
CAGCTATATTAATAGTAATTATGATAACAGGAAATTTAAATTTAACTGTTTGTACTGAATCTCAAA  
GAGCTATTTGATTTATACTACCTTTATTTCTGTGTTTATAATTTTTTCATAGGATCTATAGCTGA  
GACAAATAGAGCTCCTTTTGATTTAGCCGAGGCTAACCTGCTAATCTGGTTTGGTCTGGTTATAT  
GTCACAAATTGCTAGGAAACCTTTTTATTTAAAAACAAAAGACAATTAGCAGGAAACTTAATTT  
AACCTAATTAATAATTAGATAATTAACTCTTCATAGACTAAACGTGACAATTAATATATATA  
TATATTTATTTATATATATGATTAAATAAGATATAGTCAATCATCGGTGTGAATCGACTTAAAAAA  
AAAAGCACATGGGTAAACCCATCTCCCCTTATTAGGGGAATCAGAACTTGTTAGTGGGTTTCAT  
GACAGAGCATGCTGCCGTAGTTTTCGTATTCTTCTTTTAGCTGAGTACGGTAGTATTGTACTAAT  
GTGTATTTTAACTAGTATATTATTTATTGGTGGTTACTTATTATTTGAAATATCCTATGTTTTACTG  
TGGTAAATTATATTTCTTTGAATTATTCTTTATAGACTGAGTAACATTTGTAGAGGTACAATCTTT  
ATACACTGATTTTTTAAATAATTCTATCATTGAAGGATTATTATATGGGTTTAACTAGGATTAAA  
AAGTTCTTTAATGATATTCACATTTATTTGAGCTAGAGCATCCTTCCCTAGAATACGATTTGATCA  
ACTAATGGGCTTCTGTTGAACAGTTTTATTACCTATTAATTTTGCAATTATTATATTAGTACCTTGT  
GTTTTATATAGTTTTAACTTATTACCTGTAAATATACCATTGTTCTAGCTCACACACCCGCCGCC  
CTACTGCCACAAGGCTACAGTACATATGAGGAGGGGAACTAAAGATCTAGAACTATCCTAGTTA  
ATAATTACACTTAATAGTATACTAAATAGACCATCTATCATACTCGAGAATAGTGATAGTGAAT  
TATACACTATTTTAACTGTATTCTACACTATTAGCATATTATTATCTTTATATGATAATAATTTATA  
ACTTAATTTATTAGGTTACATTAACAAAAAATTCGTTAACTTTTTTCACCACTTTTAAATACAAAAT  
ACGAATTTTA

>YN462

ATAACAATTCTAAAGAACATAAAGAGTTATTAGATAAAAAATAATTCACCTATACAGTTAATAAAT  
CAACTTAAAGGGTATTTTTTCATAAATCCTTTATTAGCTTTAAGTTTAGCTATTACTATTTCTCTTT  
TGCAGGTATTCCTCCTCTGTAGGGTTCTTGCTAAACAGATGGTATTAAGCGCGGCTATTGATC  
AAGGTTATATCTTTTTATCTTTAGTTGCAATATTAAGTGTATAGGAGGGGTTTATTATTTAAA  
TATAATTAAGAAATGTTCTTTTATTCACCTGACTATAAATTAAACGAAGAAATTAATAAATAC  
TATTAATGGTCAAATTATTAATAGAAACAATAAAATATTAAATGTTGAATTTAATTATACAAATGT  
AGTTATGTCTAGTTCTGTGGCAATAACTATTTCTACTATTACATTAGTAGTTTTATTATTCATGTTT  
ATGAATAAAGAATGATTAAGTCTGGGTACTATATTGGTACAATCTTTATTTAGCTATTAATGAGTA  
GTATGACATTATTTATAGGGTTTGTATCTGTTATAGCTATTTTATTTTAGCCATTAATTTATATTT  
GCTCCTCATAATCCTTATCAAGAAAAATATAGTATTTTCGAGTGTGGTTTCCATAGTTTTTAGGG  
CAAAATAGAACACAATTCGGTATAAAATCTTTATTTTGTCTTAGTTTATTTACTTTTAGATTTAG

AAATATTATTAACTTTCCCTTTTCGCTCTTAGTGAGTATGTTAATGGTATTTATGGTCTTTTAGTTAC  
TTTAATTTTTATAGCTATAATAACTATAGGATTTATATTTGAATTAGGTAAAAGCGCTCTTAAAATA  
GACAGCAGACAAAAATTATATATACCTAAATTGAACGTTAATTACCATACAGAGTATGTTGGAAT  
AGGTAAGGTTTCTAAGTAAAGTTATAGAGGCAGAAAACCAAAAAACCTACCAAAGGGTAGCTA  
ATGGGAAGCTATTAATAAATAAAGATGATAACCTATATATAGTATAGTTACTATATATTTACTATA  
ACTAGGATTATTATATATATATATATTATCTTATTGTATATTAAGATTATTATTATAAGGTATA  
ATTAATATAGTATCTTATTGTATAAGAATATAATATATTAACCTATAATTAATTTTATTTTTTAATTT  
TTAATTATAATTTTTTTTTTATATCTAGATGCTTACACATCTACAGATGTAGAAGAGAACAAAATAT  
TGTTGTTATAGTAGTGGATGATATAGAAAAATTTTTTATATTATTTATTTTTGTTAGGTAGCTTTT  
GAAGTGTTTGATAGAGAGGATATATGGACGGTAGGAGGGTATTCATTTTAATGAACAGTGGAATA  
GTTTAAATTAACCTAGTTATAGTTTATGAATTTAAATTATAATTATATTAATGTAGGTTATGATAGA  
ATTATGTATTGATCCTTAAGAGTTAAGAGAGATACGCCCACGTATAATACATATTGGTTTAGGGT  
TGAGTATATATACTTAAGAGTTAAGAATATATATATACAATATATAATAAATATAGTAATATATTA  
ATGGTATGGACTTAACCAAGTTTATATATTATCATTTGATAAACATTAATTATAATTTTTCTATTTA  
TTATTATTATTATACTGTGAGATTAATAATTATTAATAATATAATATTACATAGTACGTGATATTTGG  
GGATTTTATCTTATTAATTGGCAATTAATGATTCTAATCAAATTTTATTCTCTTTAGTTTAATGGTA  
GAACAATGATCTTCTAATTCATTGGTTTTAGTTTCGATTCTAAAAAGAGATGAGTAAATAATTTTCT  
AGATCAGAAATACTACTTTTAACTACAAAAGCTTACGCTTTTTAACATTTTTTGTAAATAACA  
ACTATTGTTAATATTTGGCTGTCTATTGGTTTAACTAACAATTACAAAATTTTTTCAATTTTTATAAT  
ATAAATTTAAATGAGAATATTAATAAAGTCATTCAATTATTAATAATTAGTGAATTCTTACCTTATCGA  
TGCGTCACAACCAAGTAACATTAGTTACTTGTGAAATTTTGGTTCATTATTAGCTGTTTGTTAAT  
AGTACAAATTATTACCGGTATTACATTAGCTATGCATTATAGTCCTAGTGTAATGGAAGCTTTTAA  
CTCAATAGAGCATATAATGAGAGATGTTAATAACGGGTGATTAGTTCGTTATCTACATAGTAATA  
CAGCTTCTGCTTTCTTTTTCTTAGTGATTTACACATAGGAAGAGGTATATATTACGGATCATATA  
GAGCTCCTCGTACTTTAGTTTGAGCTATTGGTACTGTTATATTAATTAATGATGGCTATCGGTT  
TCCTAGGTTATGTTTTACCTTATGGACAGATGTCATTATGAGGTGCTACAGTTATTACTAATCTTA  
TTAGTGCTATACCTGAATAGGGCAAGATATTGTTGAATTCATTTGAGGTGGTTTTTCTGTTAATA  
ATGCCACTTTAAACAGATTTTTTGCAATTACATTTGTATTGCCTTTTGTATTAGCTGCTTTAGTTTA  
ATGCACTTAATTGCACTTCATGATACTGCTGGTTCAAGCAATCCTCTTGGTGTTTCAGGTAATTAC  
GATAGAATTACATTTGCTCCATATTTTTATTTAAAGATTTAATTACTATTTTTATATTTATTTTGTA  
TTAAGTGCTTTTGATTCTTTATGCCTAATGTTTTAGGGGATAGTGATAATTATATTATGGCTAATC  
CTATGCAAACCTCCTGCTGCTATTGTACCTGAATGATACTTATTACCTTTCTATGCTATTTTAAGATC  
TATACCTAATAAATTATTAGGTGTTATAGCGATGTTTAGTGCTATTTAGCTATTATGTTATTACCT  
GTTACAGATTTAGGTAGATCTAGAGGTTTACAATTTAGACCATTTAGTAAATAGCTTTCTGAGTT  
TTTGTTGCTAATTTCTTAGTTTAAATGCAATTAGGTGCTAAACACGTTGAAGATCCATTTATATTAT  
TAGGTCAATTAAGTACTGTATTATACTTTAGTTATTTTGTTGCTATATTACCTTTAGCTAGTTACTT  
AGATAATAGTTTAACTGATTTATCTAATAAATCTGAATTATTTTAAATAAACTAACTAAATATAT  
TAAGATTATTATTTAATATATTTTCTATTTAAGATACTATTAATTTAGTATTTTGGGTTTTAGTTTA  
TAATTTATATTATATTATGCATTACCCTCCACCTTGCTTTGTAGTAAGCTAATCTGTTATTTCTTTA  
GTTTAAATGGTAGAACAAATGATCTTCTAATTCATTGGTTTTAGTTTGAATCTAAAAAGGAAATAAG  
AAATATATTCTTATTATTACTTATATAATAATTATTTCTTAAAAATATACATTTTGCAATTATAGCCGT  
TTAGCTGTATTAAATGTAAATGATATAAAATAGAATAAATATTTAAATTATTCCTATGTTATATT  
ATCCTATATTGCAACCATTATCAGAAGTTGTATTAATACTTGTACCTGCCTTATTAGCTGTAGCTT  
ATGTTACAGTTGCTGAAAGAAAACTATGGCTAGTATGCAAGAAGATTAGGTCCTAATGCTGT

AGGTTACTATGGACTATTGCAAGCATTGCTGATGCCTTAAACCTTTTATTAAGAATATGTAG  
CTCCTACACAATCTAATATTGTTCTTTCTTTTAGGTCCTGTAATAACTTTAATTTTGCATTATTA  
GGTTACGCTGTTATACCCTATGGTCCTGGTTCAGGGATAAGCGACATGAATTTAGGTATATTTA  
CATGTTAGCTGTGTCATCTTTAGCTACATACGGTATTCTATTAGCTGGTTGAAGTGCGAATAGTA  
AATACGCTTTTCTAGGTTCTCTTAGAAGTACAGCTCAATTAATTAGTTATGAATTAATATTAAGTT  
CAGCTATATTAATAGTAATTATGATAACAGGAAATTTAAATTTAACTGTTTGTACTGAATCTCAAA  
GAGCTATTTGATTTATACTACCTTTATTTCTGTGTTTATAATATTTTTCATAGGATCTATAGCTGA  
GACAAATAGAGCTCCTTTTGATTTAGCCGAGGCTAACCTGCTAATCTGGTTTGGTCTGGTTATAT  
GTCACAAATTGCTAGGAAACCTTTTTATTTAAAAACAAAAGACAATTAGCAGGAACTTAATTT  
AACCTAATTAATAATTAGATAATTAACTCTTCATAGACTAAACGTGACAATTTAATATATATA  
TATATTTATTTATATATATGATTAAATAAGATATAGTCAATCATCGGTGTGAATCGACTTAAAAAA  
AAAAGCACATGGGTAAACCCATCTCCCCTTATTAGGGGAATCAGAAGTTGTTAGTGGGTTTCAT  
GACAGAGCATGCTGCCGTAGTTTTCGTATTCTTCTTTTAGCTGAGTACGGTAGTATTGTACTAAT  
GTGTATTTTAACTAGTATATTATTTATTGGTGGTTACTTATTATTTGAAATATCCTATGTTTTACTG  
TGGTAAATTATATTTTCTTTGAATTATCTTTATAGACTGAGTAACATTTGTAGAGGTACAATCTTT  
ATACACTGATTTTTTAAATAATTCTATCATTGAAGGATTATTATATGGGTTTAACTAGGATTAAA  
AAGTTCTTAAATGATATTCACATTTATTTGAGCTAGAGCATCCTTCCCTAGAATACGATTTGATCA  
ACTAATGGGCTTCTGTTGAACAGTTTTATTACCTATTAATTTTGCAATTATTATATTAGTACCTTGT  
GTTTTATATAGTTTTAACTTATTACCTGTAAATATACCATTGTTCTAGCTCACACACCCGCCGCC  
CTACTGCCACAAGGCTACAGTACATATGAGGAGGGGAACTAAAGATCTAGAAGTATCCTAGTTA  
ATAATTACACTTAATAGTATACTAAATAGACCATCTATCATACTCGAGAATAGTGATAGTGTAAT  
TATACACTATTTTAACTGTATTCTACACTATTAGCATATTATTATCTTTATATGATAATAATTTATA  
ACTTAATTTATTAGGTTACATTAACAAAAAATTCGTTAACTTTTTTCACCACTTTTAAATACAAAAT  
ACGAATTTTA

>YN463

ATAACAATTCTAAAGAACATAAAGAGTTATTAGATAAAAAATAATTCACCTATACAGTTAATAAAT  
CAACTTAAAGGGTATTTTTTCATAAATCCTTTATTAGCTTTAAGTTTAGCTATTACTATTTTCTCTTT  
TGCAGGTATTCCTCCTCTGTAGGGTTCTTTGCTAAACAGATGGTATTAAGCGCGGCTATTGATC  
AAGGTTATATCTTTTTATCTTTAGTTGCAATATTAAGTGTATAGGAGGGGTTTATTATTTAAA  
TATAATTAAGAAATGTTCTTTTATTCACCTGACTATAAATTAACGAAGAAATTAATAAATAC  
TATTAATGGTCAAATTATTAATAGAAACAATAAAATATTAATGTTGAATTTAATTATACAAATGT  
AGTTATGTCTAGTTCTGTGGCAATAACTATTTCTACTATTACATTAGTAGTTTTATTATTCATGTTT  
ATGAATAAAGAATGATTAAGTCTGGGTACTATATTGGTACAATCTTTATTTAGCTATTAATGAGTA  
GTATGACATTATTTATAGGGTTTGTATCTGTTATAGCTATTTTATTTTAGCCATTAATTTTATATTT  
GCTCCTCATAATCCTTATCAAGAAAAATATAGTATTTTCGAGTGTGGTTTCCATAGTTTTTTAGGG  
CAAAATAGAACACAATTCGGTATAAAATCTTTATTTTGCTTTAGTTTATTTACTTTTAGATTTAG  
AAATATTATTAACTTTCCCTTCGCTCTTAGTGAGTATGTTAATGGTATTTATGGTCTTTTAGTTAC  
TTTAATTTTTATAGCTATAATAACTATAGGATTTATATTTGAATTAGGTAAAAGCGCTCTTAAATA  
GACAGCAGACAAAAATTATATATACCTAAATTGAACGTTAATTACCATACAGAGTATGTTGGAAT  
AGGTAAGGTTTCTAAGTAAAGTTATAGAGGCAGAAAACCAAAAAACCTACCAAAGGGTAGCTA  
ATGGGAAGCTATTAAAAATAAAGATGATAACCTATATATAGTATAGTTACTATATATTTACTATA  
ACTAGGATTATTATATATATATATATTATCTTATTGTATATTAAGATTATTATTATAAGGTATA  
ATTAATATAGTATCTTATTGTATAAGAATATAATATATTAACCTATAATTAATTTATTTTTAATTT  
TTAATTATAATTTTTTTTTATATCTAGATGCTTACACATCTACAGATGTAGAAGAGAACAAAATAT

TGTTGTTATAGTAGTGGATGATATAGAAAAATATTTTTATATTATTTATTTTTGTTAGGTAGCTTTT  
GAAGTGTGTTGATAGAGAGGATATATGGACGGTAGGAGGGTATTCATTTTAATGAACAGTGGATA  
GTTTAAATTAACCTAGTTATAGTTTATGAATTTAAATTATAATTATATTAATGTAGGTTATGATAGA  
ATTATGTATTGATCCTTAAGAGTTAAGAGAGATACGCCCACGTATAATACATATTGGTTTAGGGT  
TGAGTATATATACTTAAGAGTTAAGAATATATATATACAATATATAATAAATATAGTAATATATTA  
ATGGTATGGACTTAACCAGGTTTATATATTATCATTGATAAACATTAATTATAATTTTTCTATTTA  
TTATTATTATTATACTGTGAGATTAATAATTATTTAAATATAATATTACATAGTACGTGATATTTGG  
GGATTTTATCTTATTAATTGGCAATTAATGATTCTAATCAAATTTTATTCTCTTTAGTTTAATGGTA  
GAACAATGATCTTCTAATTCATTGGTTTTAGTTTCGATTCTAAAAAGAGATGAGTAAATAATTTTCT  
AGATCAGAAATACTACTTTTAACTACAAAAAGCTTACGCTTTTAAACATTTTTTTGATAAATAACA  
ACTATTGTTAATATTTGGCTGTCTATTGGTTTAACTACAATTACAAAATTTTTTCAATTTTTATAAT  
ATAAATTTAAATGAGAATATTTAAAAAGTCATTCATTATTTAAATTAGTGAATTCTTACCTTATCGA  
TGCGTCACAACCAAGTAACATTAGTTACTTGTGAAATTTTGGTTCATTATTAGCTGTTTGTTAAT  
AGTACAAATTATTACCGGTATTACATTAGCTATGCATTATAGTCCTAGTGAATGGAAGCTTTTAA  
CTCAATAGAGCATATAATGAGAGATGTTAATAACGGGTGATTAGTTCGTTATCTACATAGTAATA  
CAGCTTCTGCTTTCTTTTCTTAGTGATTACACATAGGAAGAGGTATATATTACGGATCATATA  
GAGCTCCTCGTACTTTAGTTTGAGCTATTGGTACTGTTATATTAATTAATGATGGCTATCGGTT  
TCCTAGGTTATGTTTTACCTTATGGACAGATGTCATTATGAGGTGCTACAGTTATTACTAATCTTA  
TTAGTGCTATACCTGAATAGGGCAAGATATTGTTGAATTCATTTGAGGTGGTTTTCTGTTAATA  
ATGCCACTTTAAACAGATTTTTTGCAATTACATTTGTATTGCCTTTGTATTAGCTGCTTTAGTTTA  
ATGCACTTAATTGCACTTCATGATACTGCTGGTTCAAGCAATCCTCTGGTGTTTCAGGTAATTAC  
GATAGAATTACATTTGCTCCATATTTTTATTTAAAGATTTAATTACTATTTTTATATTTATTTTGT  
TTAAGTGCTTTGTATTCTTTATGCCTAATGTTTTAGGGGATAGTGATAATTATATTATGGCTAATC  
CTATGCAAACCTCCTGCTGCTATTGTACCTGAATGATACTTATTACCTTTCTATGCTATTTTAAGATC  
TATACCTAATAAATTATTAGGTGTTATAGCGATGTTTAGTGCTATTTAGCTATTATGTTATTACCT  
GTTACAGATTTAGGTAGATCTAGAGGTTTACAATTTAGACCATTTAGTAAAATAGCTTTCTGAGTT  
TTTGTTGCTAATTTCTTAGTTTTAATGCAATTAGGTGCTAAACACGTTGAAGATCCATTTATATTAT  
TAGGTCAATTAAGTACTGTATTATACTTTAGTTATTTTGTGCTATATTACCTTTAGCTAGTTACTT  
AGATAATAGTTTAACTGATTTATCTAATAAATCTGAATTATTTTAAATAAACTAACTAAATATAT  
TAAGATTATTATTTAATATATTTTCTATTTAAGATACTATTAATTTAGTATTTTGGGTTTTAGTTTA  
TAATTTATATTATATTATGCATTACCCTCCACCTTGCTTTGTAGTAAGCTAATCTGTTATTTCTTTA  
GTTTAATGGTAGAACAATGATCTTCTAATTCATTGGTTTTAGTTTGAATCTAAAAAGGAAATAAG  
AAATATATTCTTATTATTACTTATATAATAATTATTTCTTAAAAATATACATTTTGCAATTATAGCCGT  
TTAGCTGTATTAAATGTAAATGATATAAAATAGAATAAATATTTAAATTATTCCTATGTTATATT  
ATCCTATATTGCAACCATTATCAGAAGTTGTATTAATACTTGTACCTGCCTTATTAGCTGTAGCTT  
ATGTTACAGTTGCTGAAAGAAAACTATGGCTAGTATGCAAAGAAGATTAGGTCCTAATGCTGT  
AGGTTACTATGGACTATTGCAAGCATTTGCTGATGCCTTAAACCTTTTATTAAGAATATGTAG  
CTCCTACACAATCTAATATTGTTCTTTTCTTTTAGGTCCTGTAATAACTTTAATTTTTGCATTATTA  
GGTTACGCTGTTATACCCTATGGTCCTGGTTCAGGATAAGCGACATGAATTTAGGTATATTTTA  
CATGTTAGCTGTGTCATCTTTAGCTACATACGGTATTCTATTAGCTGGTTGAAGTGCGAATAGTA  
AATACGCTTTTCTAGGTTCTCTTAGAAGTACAGCTCAATTAATTAGTTATGAATTAATTAAGTT  
CAGCTATATTAATAGTAATTATGATAACAGGAAATTTAAATTTAACTGTTTGTACTGAATCTCAAA  
GAGCTATTTGATTTATACTACCTTTATTTCTGTGTTTATAATATTTTTCATAGGATCTATAGCTGA  
GACAAATAGAGCTCCTTTTGATTTAGCCGAGGCTAACCTGCTAATCTGGTTTGGTCTGGTTATAT

GTCACAAATTGCTAGGAAACCTTTTTATTTTAAAAACAAAAGACAATTAGCAGGAACTTAATTT  
AACCTAATTAATAATATTAGATAATTAACCTCTTCATAGACTAAACGTGACAATTTAATATATATA  
TATATTTATTTATATATATGATTAAATAAGATATAGTCAATCATCGGTGTGAATCGACTTAAAAAA  
AAAAGCACATGGGTAAACCCATCTCCCCTTATTAGGGGAATCAGAACTTGTTAGTGGGTTTCAT  
GACAGAGCATGCTGCCGTAGTTTTCGTATTCTTCTTTTAGCTGAGTACGGTAGTATTGTACTAAT  
GTGTATTTTAACTAGTATATTATTTATTGGTGGTTACTTATTATTTGAAATATCCTATGTTTTACTG  
TGGTAAATTATATTTTCTTTGAATTATTCTTTATAGACTGAGTAACATTTGTAGAGGTACAATCTTT  
ATACACTGATTTTTTAAATAATTCTATCATTGAAGGATTATTATATGGGTTTAATCTAGGATTAAA  
AAGTTCTTTAATGATATTCACATTTATTTGAGCTAGAGCATCCTTCCCTAGAATACGATTTGATCA  
ACTAATGGGCTTCTGTTGAACAGTTTTATTACCTATTAATTTTGCAATTATTATATTAGTACCTTGT  
GTTTTATATAGTTTTAACTTATTACCTGTAAATATACCATTGTTCTAGCTCACACACCCGCCGCC  
CTACTGCCACAAGGCTACAGTACATATGAGGAGGGGAACCTAAAGATCTAGAACTATCCTAGTTA  
ATAATTACACTTAATAGTATACTAAATAGACCATCTATCATACTCGAGAATAGTGATAGTGTAAT  
TATACACTATTTTAACTGTATTCTACACTATTAGCATATTATTATCTTTATATGATAATAATTTTATA  
ACTTAATTTATTAGGTTACATTAACAAAAAATTCGTTAACTTTTTTCACCACTTTTTAATACAAAAT  
ACGAATTTTA

>YN468

ATAACAATTCTAAAGAACATAAAGAGTTATTAGATAAAAAATAATTCACCTATACAGTTAATAAAT  
CAACTTAAAGGGTATTTTTTCATAAATCCTTTATTAGCTTTAAGTTAGCTATTACTATTTTCTCTTT  
TGCAGGTATTCCTCCTCTTGAGGGTCTTTGCTAAACAGATGGTATTAAGCGCGGCTATTGATC  
AAGGTTATATCTTTTATCTTTAGTTGCAATATTAAGTGTATAGGAGGGGTTTATTATTTAAA  
TATAATTAAGAAATGTTCTTTTATTCACCTGACTATAAATTAACGAAGAAATTAATAAATAC  
TATTAATGGTCAAATTATTAATAGAAACAATAAAATATTAATGTTGAATTTAATTATACAAATGT  
AGTTATGTCTAGTTCTGTGGCAATAACTATTTCTACTATTACATTAGTAGTTTTATTATTCATGTTT  
ATGAATAAAGAATGATTAAGTCTGGGTACTATATTGGTACAATCTTTATTTAGCTATTAATGAGTA  
GTATGACATTATTTATAGGGTTTGTATCTGTTATAGCTATTTTATTTTAGCCATTAATTTATATTT  
GCTCCTCATAATCCTTATCAAGAAAAATATAGTATTTTCGAGTGTGGTTTCCATAGTTTTTTAGGG  
CAAAATAGAACACAATTCGGTATAAAATCTTTATTTTGCTTTAGTTTATTTACTTTTAGATTTAG  
AAATATTATTAACCTTTCCCTTTTCGCTCTTAGTGAGTATGTTAATGGTATTTATGGTCTTTTAGTTAC  
TTTAATTTTTATAGCTATAATAACTATAGGATTTATATTTGAATTAGGTAAAAGCGCTCTTAAATA  
GACAGCAGACAAAAATTATATACCTAAATTGAACGTTAATTACCATACAGAGTATGTTGGAAT  
AGGTAAGGTTTCTAAGTAAAGTTATAGAGGCAGAAAACCAAAAAACCTACCAAAGGGTAGCTA  
ATGGGAAGCTATTAATAAAGATGATAACCTATATATAGTATAGTTACTATATATTTACTATA  
ACTAGGATTATTATATATATATATATTATCTTATTGTATATTAAGATTATTATTATAAGGTATA  
ATTAATATAGTATCTTATTGTATAAGAATATAATATATTAACCTATAATTAATTTATTTTTAATTT  
TTAATTATAATTTTTTTTTATATCTAGATGCTTACACATCTACAGATGTAGAAGAGAACAAAATAT  
TGTTGTTATAGTAGTGATATAGAAAAATATTTTATATTATTTATTTTGTAGGTAGCTTTT  
GAAGTGTGATAGAGAGGATATATGGACGGTAGGAGGTATTCATTTAATGAACAGTGGATA  
GTTTAAATTAACCTAGTTATAGTTTATGAATTTAAATTATAATTATATTAATGTAGGTATGATAGA  
ATTATGTATTGATCCTTAAGAGTTAAGAGAGATACGCCACGTATAATACATATTGGTTAGGGT  
TGAGTATATATACTTAAGAGTTAAGAATATATATATACAATATATAATAAATATAGTAATATATTA  
ATGGTATGGACTTAACCAGGTTTATATATTATCATTTGATAAACATTAATTATAATTTTTCTATTTA  
TTATTATTATACTGTGAGATTAATAATTATTAATAATATTACATAGTACGTGATATTTGG  
GGATTTTATCTTATTAATTGGCAATTAATGATTCTAATCAAATTTTATTCTCTTAGTTAATGGTA

GAACAATGATCTTCTAATTCATTGGTTTTAGTTTCGATTCTAAAAAGAGATGAGTAAATAATTTTCT  
AGATCAGAAATACTACTTTTAACTACAAAAAGCTTACGCTTTTAAACATTTTTTGTAAATAACA  
ACTATTGTTAATATTTGGCTGTCTATTGGTTTAACTAACAATTACAAAATTTTTCAATTTTTATAAT  
ATAAATTTAAATGAGAATATTA AAAAGTCATTATTATTA AAATTAGTGAATTCTTACCTTATCGA  
TGCGTCACAACCAAGTAACATTAGTTACTTGTGAAATTTTGGTTCATTATTAGCTGTTTGTTAAT  
AGTACAAATTATTACCGGTATTACATTAGCTATGCATTATAGTCCTAGTGAATGGAAGCTTTTAA  
CTCAATAGAGCATATAATGAGAGATGTTAATAACGGGTGATTAGTTCGTTATCTACATAGTAATA  
CAGCTTCTGCTTTCTTTTTCTTAGTGATTTACACATAGGAAGAGGTATATATTACGGATCATATA  
GAGCTCCTCGTACTTTAGTTTGAGCTATTGGTACTGTTATATTAATTAATGATGGCTATCGGT  
TCCTAGGTTATGTTTTACCTTATGGACAGATGTCATTATGAGGTGCTACAGTTATTACTAATCTTA  
TTAGTGCTATACCTGAATAGGGCAAGATATTGTTGAATTCATTTGAGGTGGTTTTCTGTTAATA  
ATGCCACTTTAAACAGATTTTTGCATTACATTTGTATTGCCTTTGTATTAGCTGCTTTAGTTTAA  
ATGCACTTAATTGCACTTCATGATACTGCTGGTTCAAGCAATCCTCTGGTGTTTCAGGTAATTAC  
GATAGAATTACATTTGCTCCATATTTTTATTTAAAGATTTAATTACTATTTTTATTTATTTTTGTA  
TTAAGTGCTTTTGTATTCTTTATGCCTAATGTTTTAGGGGATAGTGATAATTATATTATGGCTAATC  
CTATGCAAACCTCTGCTGCTATTGTACCTGAATGATACTTATTACCTTTCTATGCTATTTTAAGATC  
TATACCTAATAAATTATTAGGTGTTATAGCGATGTTTAGTGCTATTTTAGCTATTATGTTATTACCT  
GTTACAGATTTAGGTAGATCTAGAGGTTTACAATTTAGACCATTTAGTAAAATAGCTTTCTGAGTT  
TTTGTTGCTAATTTCTTAGTTTTAATGCAATTAGGTGCTAAACACGTTGAAGATCCATTTATATTAT  
TAGGTCAATTAAGTACTGTATTATACTTTAGTTATTTTTGTTGCTATATTACCTTTAGCTAGTTACTT  
AGATAATAGTTTAACTGATTTATCTAATAAATCTGAATTATTTTAAATAAACTAACTAAATATAT  
TAAGATTATTATTTAATATATTTTCTATTTAAGATACTATTAATTTAGTATTTTGGGTTTTCAGTTTA  
TAATTTATATTATATTATGCATTACCTCCACCTTGCTTTGTAGTAAGCTAATCTGTTATTTCTTTA  
GTTTAATGGTAGAACAATGATCTTCTAATTCATTGGTTTTAGTTTGAATCTAAAAAGGAAATAAG  
AAATATATTCTTATTATTACTTATATAATAATTATTTCTTAAAAATATACATTTTGCATTATAGCCGT  
TTAGCTGTATTA AAAATGTAAAATGATATAAAATAGAATAAATATTTAAATTATTCCTATGTTATATT  
ATCCTATATTGCAACCATTATCAGAAGTTGTATTAATACTTGTACCTGCCTTATTAGCTGTAGCTT  
ATGTTACAGTTGCTGAAAGAAAACTATGGCTAGTATGCAAAGAAGATTAGGTCCTAATGCTGT  
AGGTTACTATGGACTATTGCAAGCATTGCTGATGCCTTAAACTTTTATTAAGAATATGTAG  
CTCCTACACAATCTAATATTGTTCTTTCTTTTAGGTCCTGTAATAACTTTAATTTTTGCATTATTA  
GGTTACGCTGTTATACCCTATGGTCCTGGTTCAGGGATAAGCGACATGAATTTAGGTATATTTTA  
CATGTTAGCTGTGTCATCTTTAGCTACATACGGTATTCTATTAGCTGGTTGAAGTGCGAATAGTA  
AATACGCTTTTCTAGGTTCTCTTAGAAGTACAGCTCAATTAATTAGTTATGAATTAATTAAGTT  
CAGCTATATTAATAGTAATTATGATAACAGGAAATTTAAATTTAACTGTTTGTACTGAATCTCAAA  
GAGCTATTTGATTTATACTACCTTTATTTCTGTGTTATAATATTTTTCATAGGATCTATAGCTGA  
GACAAATAGAGCTCCTTTTGATTTAGCCGAGGCTAACCTGCTAATCTGGTTTGGTCTGGTTATAT  
GTCACAAATTGCTAGGAAACCTTTTTATTTTAAAAACAAAAGACAATTAGCAGGAAACTTAATTT  
AACCTAATTA AAAATATTAGATAATTAACTCTTCATAGACTAAACGTGACAATTTAATATATATA  
TATATTTATTTATATATATGATTAAATAAGATATAGTCAATCATCGGTGTGAATCGACTTAAAAAA  
AAAAGCACATGGGTAAACCCATCTCCCTTATTAGGGGAATCAGAACTTGTTAGTGGGTTTCAT  
GACAGAGCATGCTGCCGTAGTTTTCGTATTCTTCTTTTAGCTGAGTACGGTAGTATTGTACTAAT  
GTGTATTTTAACTAGTATATTATTTATTGGTGGTTACTTATTATTTGAAATATCCTATGTTTTTACTG  
TGGTAAATTATATTTTCTTTGAATTATTCTTTATAGACTGAGTAACATTTGTAGAGGTACAATCTTT  
ATACACTGATTTTTTAAATAATTCTATCATTGAAGGATTATTATATGGGTTAATCTAGGATTA

AAGTTCTTTAATGATATTCACATTTATTTGAGCTAGAGCATCCTTCCCTAGAATACGATTTGATCA  
ACTAATGGGCTTCTGTTGAACAGTTTTATTACCTATTAATTTTGCAATTATTATATTAGTACCTTGT  
GTTTTATATAGTTTTAACTTATTACCTGTAAATATACCATTGTTCTAGCTCACACACCCGCCGCC  
CTACTGCCACAAGGCTACAGTACATATGAGGAGGGGAAGTAAAGATCTAGAACTATCCTAGTTA  
ATAATTACACTTAATAGTATACTAAATAGACCATCTATCATACTCGAGAATAGTGATAGTGTAAT  
TATACACTATTTTAACTGTATTCTACACTATTAGCATATTATTATCTTTATATGATAATAATTTTATA  
ACTTAATTTATTAGGTTACATTAACAAAAAATTCGTTAACTTTTTTCACCACTTTTAAATACAAAAT  
ACGAATTTTA

>YN476

ATAACAATTCTAAAGAACATAAAGAGTTATTAGATAAAAAATAATTCACCTATACAGTTAATAAAT  
CAACTTAAAGGGTATTTTTTCATAAATCCTTTATTAGCTTTAAGTTTAGCTATTACTATTTCTCTTT  
TGCAGGTATTCTCCTCTTGTAGGGTCTTTGCTAAACAGATGGTATTAAGCGCGGCTATTGATC  
AAGGTTATATCTTTTTATCTTTAGTTGCAATATTAAGTGTATAGGAGGGGTTTATTATTTAAA  
TATAATTAAGAAATGTTCTTTTATTCACCTGACTATAAATTAACGAAGAAATTAATAAATAC  
TATTAATGGTCAAATTATTAATAGAAACAATAAATATTAATGTTGAATTTAATTATACAAATGT  
AGTTATGTCTAGTTCTGTGGCAATAACTATTTCTACTATTACATTAGTAGTTTTATTATTCATGTTT  
ATGAATAAAGAATGATTAAGTCTGGGTACTATATTGGTACAATCTTTATTTAGCTATTAATGAGTA  
GTATGACATTATTTATAGGGTTGTATCTGTTATAGCTATTTTATTTTAGCCATTAATTTATATTT  
GCTCCTCATAATCCTTATCAAGAAAAATATAGTATTTTCGAGTGTGGTTTCCATAGTTTTTTAGGG  
CAAAATAGAACACAATTCGGTATAAAATTCCTTTATTTTGTCTTAGTTTATTTACTTTTAGATTTAG  
AAATATTATTAACTTTCCCTTCGCTCTTAGTGAGTATGTTAATGGTATTTATGGTCTTTTAGTTAC  
TTTAATTTTTATAGCTATAATAACTATAGGATTTATATTTGAATTAGGTAAGCGCTCTTAAATA  
GACAGCAGACAAAAATTATATATACCTAAATTGAACGTTAATTACCATACAGAGTATGTTGGAAT  
AGGTAAGGTTTCTAAGTAAAGTTATAGAGGCAGAAAACCAAAAAACCTACCAAAGGGTAGCTA  
ATGGGAAGCTATTAATAAATAAAGATGATAACCTATATATAGTATAGTTACTATATATTTACTATA  
ACTAGGATTATTATATATATATATATTATCTTATTGTATATTAAGATTATTATTATAAGGTATA  
ATTAATATAGTATCTTATTGTATAAGAATATAATATATTAACCTATAATTAATTTTATTTTTAATTT  
TTAATTATAATTTTTTTTTATATCTAGATGCTTACACATCTACAGATGTAGAAGAGAACAAAATAT  
TGTTGTTATAGTAGTGGATGATATAGAAAAATATTTTTATATTATTTATTTTGTAGGTAGCTTTT  
GAAGTGTGTTGATAGAGAGGATATATGGACGGTAGGAGGGTATTCATTTAATGAACAGTGGATA  
GTTTAAATTAACCTAGTTATAGTTTATGAATTTAAATTATAATTATATTAATGTAGGTTATGATAGA  
ATTATGTATTGATCCTTAAGAGTTAAGAGAGATACGCCACGTATAATACATATTGGTTTAGGGT  
TGAGTATATATACTTAAGAGTTAAGAATATATATATACAATATATAATAAATATAGTAATATATTA  
ATGGTATGGACTTAACCAGGTTTATATATTATCATTTGATAAACATTAATTATAATTTTTCTATTTA  
TTATTATTATTATACTGTGAGATTAATAATTATTAATAATATAATATTACATAGTACGTGATATTTGG  
GGATTTTATCTTATTAATTGGCAATTAATGATTCTAATCAAATTTTATTCTCTTAGTTAATGGTA  
GAACAATGATCTTCTAATTCATTGGTTTTAGTTTCGATTCTAAAAAGAGATGAGTAAATAATTTTCT  
AGATCAGAAATACTACTTTTAACTACAAAAGCTTACGCTTTTAAACATTTTTTGTAAATAACA  
ACTATTGTTAATATTTGGCTGTCTATTGGTTTAACTAACAATTACAAAATTTTTCAATTTTTATAAT  
ATAAATTTAAATGAGAATATTAATAAAGTCATTATTATTAATAAATTAGTGAATCTTACCTTATCGA  
TGCGTCACAACCAAGTAACATTAGTTACTTGTGAAATTTTGGTTCATTATTAGCTGTTTGTAAAT  
AGTACAAATTATTACCGGTATTACATTAGCTATGCATTATAGTCCTAGTGTAATGGAAGCTTTTAA  
CTCAATAGAGCATATAATGAGAGATGTTAATAACGGGTGATTAGTTCGTTATCTACATAGTAATA  
CAGCTTCTGCTTTCTTTTCTTAGTGTATTTACACATAGGAAGAGGTATATATTACGGATCATATA

GAGCTCCTCGTACTTTAGTTTGAGCTATTGGTACTGTTATATTAATATTAATGATGGCTATCGGTT  
TCCTAGGTTATGTTTTACCTTATGGACAGATGTCATTATGAGGTGCTACAGTTATTACTAATCTTA  
TTAGTGCTATACCTGAATAGGGCAAGATATTGTTGAATTCATTTGAGGTGGTTTTCTGTTAATA  
ATGCCACTTTAAACAGATTTTTGCATTACATTTGTATTGCCTTTGTATTAGCTGCTTTAGTTTTA  
ATGCACTTAATTGCACTTCATGATACTGCTGGTTCAAGCAATCCTCTTGGTGTTCAGGTAATTAC  
GATAGAATTACATTTGCTCCATATTTTTATTTAAAGATTTAATTACTATTTTTATATTTATTTTTGTA  
TTAAGTGCTTTTGTATTCTTTATGCCTAATGTTTTAGGGGATAGTGATAATTATATTATGGCTAATC  
CTATGCCAACTCCTGCTGCTATTGTACCTGAATGATACTTATTACCTTTCTATGCTATTTAAGATC  
TATACCTAATAAATTATTAGGTGTTATAGCGATGTTTAGTGCTATTTTAGCTATTATGTTATTACCT  
GTTACAGATTTAGGTAGATCTAGAGGTTTACAATTTAGACCATTTAGTAAAATAGCTTTCTGAGTT  
TTTGTTGCTAATTTCTTAGTTTTAATGCAATTAGGTGCTAAACACGTTGAAGATCCATTTATATTAT  
TAGGTCAATTAAGTACTGTATTATACTTTAGTTATTTTGTGCTATATTACCTTTAGCTAGTTACTT  
AGATAATAGTTTAACTGATTTATCTAATAAATCTGAATTATTTTAAATAAACTAACTAAATATAT  
TAAGATTATTATTTAATATATTTTCTATTTAAGATACTATTAATTTAGTATTTTGGGTTTTCAGTTTA  
TAATTTATATTATATTATGCATTACCCTCCACCTTGCTTTGTAGTAAGCTAATCTGTTATTTCTTTA  
GTTAATGGTAGAACAATGATCTTCTAATTCATTGGTTTTAGTTCGAATCTAAAAAGGAAATAAG  
AAATATATTCTTATTATTACTTATATAATAATTATTTCTTAAAAATATACATTTTGCATTATAGCCGT  
TTAGCTGTATTAATAATGTAAATGATATAAAATAGAATAAATATTTAAATTATTCCTATGTTATATT  
ATCCTATATTGCAACCATTATCAGAAGTTGTATTAATACTTGTACCTGCCTTATTAGCTGTAGCTT  
ATGTTACAGTTGCTGAAAGAAAACTATGGCTAGTATGCAAAGAAGATTAGGTCCTAATGCTGT  
AGGTTACTATGGACTATTGCAAGCATTTGCTGATGCCTTAAACTTTTTATTAAGAATATGTAG  
CTCCTACACAATCTAATATTGTTCTTTTCTTTTAGGTCCTGTAATAACTTTAATTTTTGCATTATTA  
GGTTACGCTGTTATACCCTATGGTCCTGGTTCAGGGATAAGCGACATGAATTTAGGTATATTTA  
CATGTTAGCTGTGTCATCTTTAGCTACATACGGTATTCTATTAGCTGGTTGAAGTGCGAATAGTA  
AATACGCTTTTCTAGGTTCTCTTAGAAGTACAGCTCAATTAATTAGTTATGAATTAATATTAAGTT  
CAGCTATATTAATAGTAATTATGATAACAGGAAATTTAAATTTAACTGTTTGTACTGAATCTCAAA  
GAGCTATTTGATTTATACTACCTTTATTTCTGTGTTTATAATTTTTTCATAGGATCTATAGCTGA  
GACAAATAGAGCTCCTTTTGATTTAGCCGAGGCTAACCTGCTAATCTGGTTTGGTCTGGTTATAT  
GTCACAAATTGCTAGGAAACCTTTTTATTTAAAAACAAAAGACAATTAGCAGGAACTTAATTT  
AACCTAATTAATAATATTAGATAATTAACTCTTCATAGACTAAACGTGACAATTTAATATATATA  
TATATTTATTTATATATATGATTAATAAGATATAGTCAATCATCGGTGTGAATCGACTTAAAAAA  
AAAAGCACATGGGTAAACCCATCTCCCCTTATTAGGGGAATCAGAACTTGTTAGTGGGTTTCAT  
GACAGAGCATGCTGCCGTAGTTTTCGTATTCTTCTTTTAGCTGAGTACGGTAGTATTGTACTAAT  
GTGTATTTTAACTAGTATATTATTTATTGGTGGTTACTTATTATTTGAAATATCCTATGTTTTACTG  
TGGTAAATTATTTTTCTTTGAATTATTCTTTATAGACTGAGTAACATTTGTAGAGGTACAATCTTT  
ATACACTGATTTTTTAAATAATTCTATCATTGAAGGATTATTATATGGGTTTAACTAGGATTA  
AAGTTCTTTAATGATATTCACATTTATTTGAGCTAGAGCATCCTTCCCTAGAATACGATTTGATCA  
ACTAATGGGCTTCTGTTGAACAGTTTTATTACCTATTAATTTTGCAATTATTATATTAGTACCTTGT  
GTTTTATATAGTTTTAACTTATTACCTGTAAATATACCATTGTTCTAGCTCACACACCCGCCGCC  
CTACTGCCACAAGGCTACAGTACATATGAGGAGGGGAACTAAAGATCTAGAACTATCCTAGTTA  
ATAATTACACTTAATAGTATACTAAATAGACCATCTATCATACTCGAGAATAGTGATAGTGTAAT  
TATACACTATTTTAACTGTATTCTACACTATTAGGATATTATTATCTTTATATGATAATAATTTTATA  
ACTTAATTTATTAGGTTACATTAACAAAAAATTCGTTAACTTTTTTCACCACTTTTAAATACAAAAT  
ACGAATTTA

>YN477

ATAACAATTCTAAAGAACATAAAGAGTTATTAGATAAAAAATAATTCACCTATACAGTTAATAAAT  
CAACTTAAAGGGTATTTTTTCATAAATCCTTTATTAGCTTTAAGTTTAGCTATTACTATTTCTCTTT  
TGCAGGTATTCCTCCTCTTG TAGGGTCTTTGCTAAACAGATGGTATTAAGCGCGGCTATTGATC  
AAGGTTATATCTTTTTATCTTTAGTTGCAATATTAAGTAGTGTTATAGGAGGGGTTTATTATTTAAA  
TATAATTAAGAAATGTTCTTTTATTCACCTGACTATAAATTAACGAAGAAATTAATAAATAATAC  
TATTAATGGTCAAATTATTAATAGAAACAATAAAATATTAATGTTGAATTTAATTATACAAATGT  
AGTTATGTCTAGTTCTGTGGCAATAACTATTTCTACTATTACATTAGTAGTTTTATTATTCATGTTT  
ATGAATAAAGAATGATTAAGTCTGGGTACTATATTGGTACAATCTTTATTTAGCTATTAATGAGTA  
GTATGACATTATTTATAGGGTTTGTATCTGTTATAGCTATTTTATTTTAGCCATTAATTTATATTT  
GCTCCTCATAATCCTTATCAAGAAAAATATAGTATTTTCGAGTGTGGTTTCCATAGTTTTTTAGGG  
CAAAATAGAACACAATTCGGTATAAAATTCTTTATTTTGTCTTAGTTTATTTACTTTTAGATTTAG  
AAATATTATTAACTTTCCCTTTTCGCTCTTAGTGAGTATGTTAATGGTATTTATGGTCTTTTAGTTAC  
TTTAATTTTATAGCTATAATAACTATAGGATTTATATTTGAATTAGGTAAAAGCGCTCTTAAATA  
GACAGCAGACAAAAATTATATATACCTAAATTGAACGTTAATTACCATACAGAGTATGTTGGAAT  
AGGTAAGGTTTCTAAGTAAAGTTATAGAGGCAGAAAACCAAAAACCTACCAAAGGGTAGCTA  
ATGGGAAGCTATTAATAAATAAAGATGATAACCTATATATAGTATAGTTACTATATATTTACTATA  
ACTAGGATTATTATATATATATATATTATCTTATTGTATATTAAGATTATTATTATTATAAGGTATA  
ATTAATATAGTATCTTATTGTATAAGAATATAATATATTAACCTATAATTAATTTTATTTTAAATTT  
TTAATTATAATTTTTTTTTATATCTAGATGCTTACACATCTACAGATGTAGAAGAGAACAAAATAT  
TGTTGTTATAGTAGTGATATAGAAAAATATTTTATATTATTTATTTTGTAGGTAGCTTTT  
GAAGTGTTTGATAGAGAGGATATATGGACGGTAGGAGGGTATTCATTTTAAATGAACAGTGGATA  
GTTTAAATTAACCTAGTTATAGTTTATGAATTTAAATTATAATTATATTAATGTAGGTTATGATAGA  
ATTATGTATTGATCCTTAAGAGTTAAGAGAGATACGCCACGTATAATACATATTGGTTTAGGGT  
TGAGTATATATACTTAAGAGTTAAGAATATATATATACAATATATAATAAATATAGTAATATATTA  
ATGGTATGGACTTAACCAGGTTTATATTATCATTGATAAACATTAATTATAATTTTCTATTTA  
TTATTATTATTATACTGTGAGATTAATAATTATTAATAATATAATATTACATAGTACGTGATATTTGG  
GGATTTTATCTTATTAATTGGCAATTAATGATTCTAATCAAATTTTATTCTCTTAGTTTAAATGGTA  
GAACAATGATCTTCTAATTCATTGGTTTTAGTTTCGATTCTAAAAAGAGATGAGTAAATAATTTTCT  
AGATCAGAAATACTACTTTTAACTACAAAAGCTTACGCTTTTAAACATTTTTTGTAAATAACA  
ACTATTGTTAATATTTGGCTGTCTATTGGTTTAACTACAATTACAAAATTTTTCAATTTTATAAT  
ATAAATTTAAATGAGAATATTAATAAAGTCATTCATTATTAATAAATTAGTGAATTCTTACCTTATCGA  
TGCGTCACAACCAAGTAACATTAGTTACTTGTGAAATTTTGGTTCATTATTAGCTGTTTGTAAAT  
AGTACAAATTATTACCGGTATTACATTAGCTATGCATTATAGTCCTAGTGAATGGAAGCTTTTAA  
CTCAATAGAGCATATAATGAGAGATGTTAATAACGGGTGATTAGTTCGTTATCTACATAGTAATA  
CAGCTTCTGCTTTCTTTTCTTAGTGATTTACACATAGGAAGAGGTATATATTACGGATCATATA  
GAGCTCCTCGTACTTTAGTTTGAGCTATTGGTACTGTTATATTAATTAATGATGGCTATCGGTT  
TCCTAGGTTATGTTTTACCTTATGGACAGATGTCATTATGAGGTGCTACAGTTATTACTAATCTTA  
TTAGTGCTATACCTGAATAGGGCAAGATATTGTTGAATTCATTTGAGGTGGTTTTTCTGTAAATA  
ATGCCACTTTAAACAGATTTTTTGCAATTACATTTGTATTGCCTTTTGTATTAGCTGCTTTAGTTTA  
ATGCACTTAATTGCACTTCATGATACTGCTGGTTCAAGCAATCCTCTTGGTGTTTCAGGTAATTAC  
GATAGAATTACATTTGCTCCATATTTTTATTTAAAGATTTAATTACTATTTTTATATTTATTTTGT  
TTAAGTGCTTTTGTATTCTTTATGCCTAATGTTTTAGGGGATAGTGATAATTATATTATGGCTAATC  
CTATGCAAACCTCCTGCTGCTATTGTACCTGAATGATACTTATTACCTTTCTATGCTATTTTAAGATC

TATACCTAATAAATTATTAGGTGTTATAGCGATGTTTAGTGCTATTTTAGCTATTATGTTATTACCT  
GTTACAGATTTAGGTAGATCTAGAGGTTTACAATTTAGACCATTTAGTAAAATAGCTTTCTGAGTT  
TTTGTTGCTAATTTCTTAGTTTTAATGCAATTAGGTGCTAAACACGTTGAAGATCCATTTATATTAT  
TAGGTCAATTAAGTACTGTATTATACTTTAGTTATTTTGTGCTATATTACCTTTAGCTAGTTACTT  
AGATAATAGTTTAACTGATTTATCTAATAAATCTGAATTATTTTAAATAAACTAACTAAATATAT  
TAAGATTATTATTTAATATATTTTCTATTTAAGATACTATTAATTTAGTATTTTGGGTTTTAGTTTA  
TAATTTATATTATATTATGCATTACCCTCCACCTTGCTTTGTAGTAAGCTAATCTGTTATTTCTTTA  
GTTTAATGGTAGAACAATGATCTTCTAATTCATTGGTTTTAGTTCGAATCTAAAAAGGAAATAAG  
AAATATATTCTTATTATTACTTATATAATAATTATTTCTTAAAAATATACATTTTGCATTATAGCCGT  
TTAGCTGTATTAAATGTAAATGATATAAAATAGAATAAATATTTAAATTATTCCTATGTTATATT  
ATCCTATATTGCAACCATTATCAGAAGTTGTATTAATACTTGTACCTGCCTTATTAGCTGTAGCTT  
ATGTTACAGTTGCTGAAAGAAAACTATGGCTAGTATGCAAAGAAGATTAGGTCCTAATGCTGT  
AGGTTACTATGGACTATTGCAAGCATTTGCTGATGCCTTAAACTTTTTATTAAAGAATATGTAG  
CTCCTACACAATCTAATATTGTTCTTTTCTTTTAGGTCCTGTAATAACTTTAATTTTTGCATTATTA  
GGTTACGCTGTTATACCCTATGGTCCTGGTTCAGGGATAAGCGACATGAATTTAGGTATATTTTA  
CATGTTAGCTGTGTCATCTTTAGCTACATACGGTATTCTATTAGCTGGTTGAAGTGCGAATAGTA  
AATACGCTTTTCTAGGTTCTCTTAGAAGTACAGCTCAATTAATTAGTTATGAATTAATATTAAGTT  
CAGCTATATTAATAGTAATTATGATAACAGGAAATTTAAATTTAACTGTTTGTACTGAATCTCAAA  
GAGCTATTTGATTTATACTACCTTTATTTCTGTGTTTATAATATTTTTCATAGGATCTATAGCTGA  
GACAAATAGAGCTCCTTTTGATTTAGCCGAGGCTAACCTGCTAATCTGGTTTGGTCTGGTTATAT  
GTCACAAATTGCTAGGAAACCTTTTTATTTTAAAAACAAAAGACAATTAGCAGGAACTTAATTT  
AACCTAATTAATAATATTAGATAATTAACTCTTCATAGACTAAACGTGACAATTTAATATATATA  
TATATTTATTTATATATATGATTAATAAGATATAGTCAATCATCGGTGTGAATCGACTTAAAAAA  
AAAAGCACATGGGTAAACCCATCTCCCCTTATTAGGGGAATCAGAACTTGTTAGTGGGTTTCAT  
GACAGAGCATGCTGCCGTAGTTTTCGTATTCTTCTTTTAGCTGAGTACGGTAGTATTGTACTAAT  
GTGTATTTTAACTAGTATATTATTTATTGGTGGTTACTTATTATTTGAAATATCCTATGTTTTACTG  
TGGTAAATTATATTTTCTTTGAATTATTCTTTATAGACTGAGTAACATTTGTAGAGGTACAATCTTT  
ATACACTGATTTTTTAAATAATTCTATCATTGAAGGATTATTATATGGGTTTAACTAGGATTAAA  
AAGTTCTTTAATGATATTCACATTTATTTGAGCTAGAGCATCCTTCCCTAGAATACGATTTGATCA  
ACTAATGGGCTTCTGTTGAACAGTTTTATTACCTATTAATTTTGCAATTATTATATTAGTACCTTGT  
GTTTTATATAGTTTTAACTTATTACCTGTAAATATACCATTGTTCTAGCTCACACACCCGCCGCC  
CTACTGCCACAAGGCTACAGTACATATGAGGAGGGGAATAAGATCTAGAACTATCCTAGTTA  
ATAATTACACTTAATAGTATACTAAATAGACCATCTATCATACTCGAGAATAGTGATAGTGTAAT  
TATACACTATTTTAACTGTATTCTACACTATTAGGATATTATTATCTTTATATGATAATAATTTTATA  
ACTTAATTTATTAGGTTACATTAACAAAAAATTCGTTAACTTTTTTCACCACTTTTTAATACAAAAAT  
ACGAATTTTA

>YN480

ATAACAATTCTAAAGAACATAAAGAGTTATTAGATAAAAAATAATTCACCTATACAGTTAATAAAT  
CAACTTAAAGGGTATTTTTTCATAAATCCTTTATTAGCTTTAAGTTTAGCTATTACTATTTTCTCTTT  
TGCAGGTATTCCTCCTCTGTAGGGTTCTTTGCTAAACAGATGGTATTAAGCGCGGCTATTGATC  
AAGGTTATATCTTTTATCTTTAGTTGCAATATTAAGTGTATAGGAGGGGTTTATTATTTAAA  
TATAATTAAGAAATGTTCTTTTATTCACCTGACTATAAATTAACGAAGAAATTAATAATAATAC  
TATTAATGGTCAAATTATTAATAGAAACAATAAAATATTAATGTTGAATTTAATTATACAAATGT  
AGTTATGTCTAGTTCTGTGGCAATAACTATTTCTACTATTACATTAGTAGTTTTATTATTCATGTTT

ATGAATAAAGAATGATTAAGTCTGGGTACTATATTGGTACAATCTTTATTTAGCTATTAATGAGTA  
GTATGACATTATTTATAGGGTTTGTATCTGTTATAGCTATTTTATTTTATAGCCATTAATTTTATATTT  
GCTCCTCATAATCCTTATCAAGAAAAATATAGTATTTTCGAGTGTGGTTTCCATAGTTTTTATAGG  
CAAAATAGAACACAATTCGGTATAAAATTCCTTATTTTGTCTTAGTTTATTTACTTTTAGATTTAG  
AAATATTATTAACTTTCCCTTTCGCTCTTAGTGAGTATGTTAATGGTATTTATGGTCTTTTAGTTAC  
TTTAATTTTATAGCTATAATAACTATAGGATTTATATTTGAATTAGGTAAAAGCGCTCTTAAAATA  
GACAGCAGACAAAAATTATATATACCTAAATTGAACGTTAATTACCATACAGAGTATGTTGGAAT  
AGGTAAGGTTTCTAAGTAAAGTTATAGAGGCAGAAAACCAAAAAACCTACCAAAGGGTAGCTA  
ATGGGAAGCTATTAATAAATAAAGATGATAACCTATATATAGTATAGTTACTATATATTTACTATA  
ACTAGGATTATTATATATATATATATTATCTTATTGTATATTAAGATTATTATTATAAGGTATA  
ATTAATATAGTATCTTATTGTATAAGAATATAATATATTAACCTATAATTAATTTTATTTTAAATTT  
TTAATTATAATTTTTTTTTTATATCTAGATGCTTACACATCTACAGATGTAGAAGAGAACAAAATAT  
TGTTGTTATAGTAGTGGATGATATAGAAAAATATTTTATATTATTTATTTTGTAGGTAGCTTTT  
GAAGTGTGATAGAGAGGATATATGGACGGTAGGAGGGTATTCATTTTAATGAACAGTGGATA  
GTTTAAATTAACCTAGTTATAGTTTATGAATTTAAATTATAATTATATTAATGTAGGTATGATAGA  
ATTATGTATTGATCCTTAAGAGTTAAGAGAGATACGCCACGTATAATACATATTGGTTTAGGGT  
TGAGTATATATACTTAAGAGTTAAGAATATATATATACAATATATAATAAATATAGTAATATATTA  
ATGGTATGGACTTAACCAGGTTTATATATTATCATTTGATAAACATTAATTATAATTTTCTATTTA  
TTATTATTATTACTGTGAGATTAATAATTATTAATAATATTACATAGTACGTGATATTTGG  
GGATTTTATCTTATTAATTGGCAATTAATGATTCTAATCAAATTTTATTCTCTTTAGTTTAAATGGTA  
GAACAATGATCTTCTAATTCATTGGTTTTAGTTTCGATTCTAAAAAGAGATGAGTAAATAATTTTCT  
AGATCAGAAATACTACTTTTAACTACAAAAAGCTTACGCTTTTAAACATTTTTTTGATAAATAACA  
ACTATTGTTAATATTTGGCTGTCTATTGGTTTAACTACAATTACAAAATTTTTCAATTTTATAAT  
ATAAATTTAAATGAGAATATTAATAAAGTCATTCAATTATTAATAATTAGTGAATTCTTACCTTATCGA  
TGCGTCACAACCAAGTAACATTAGTTACTTGTGAAATTTTGGTTCATTATTAGCTGTTTGTTAAT  
AGTACAAATTATTACCGGTATTACATTAGCTATGCATTATAGTCCTAGTGTAATGGAAGCTTTTAA  
CTCAATAGAGCATATAATGAGAGATGTTAATAACGGGTGATTAGTTCGTTATCTACATAGTAATA  
CAGCTTCTGCTTTCTTTTCTTAGTGATTACACATAGGAAGAGGTATATATTACGGATCATATA  
GAGCTCCTCGTACTTTAGTTTGAGCTATTGGTACTGTTATATTAATTAATGATGGCTATCGGT  
TCCTAGGTATGTTTTACCTTATGGACAGATGTCATTATGAGGTGCTACAGTTATTACTAATCTTA  
TTAGTGCTATACCTGAATAGGGCAAGATATTGTTGAATTCATTTGAGGTGGTTTTCTGTTAATA  
ATGCCACTTTAAACAGATTTTTGCATTACATTTGTATTGCCTTTGTATTAGCTGCTTTAGTTTAA  
ATGCACTTAATTGCACTTCATGATACTGCTGGTTCAAGCAATCCTCTTGGTGTTTCAGGTAATTAC  
GATAGAATTACATTTGCTCCATATTTTTATTTAAAGATTTAATTACTATTTTATATTTATTTTGT  
TTAAGTGCTTTTGATTCTTTATGCCTAATGTTTTAGGGGATAGTGATAATTATATTATGGCTAATC  
CTATGCAAACCTGCTGCTATTGTACCTGAATGATACTTATTACCTTCTATGCTATTTTAAAGATC  
TATACCTAATAAATTATTAGGTGTTATAGCGATGTTTAGTGCTATTTTAGCTATTATGTTATTACCT  
GTTACAGATTTAGGTAGATCTAGAGGTTTACAATTTAGACCATTTAGTAAATAGCTTTCTGAGTT  
TTTGTTGCTAATTTCTTAGTTTTAATGCAATTAGGTGCTAAACACGTTGAAGATCCATTTATATTAT  
TAGGTCAATTAAGTACTGTATTATACTTTAGTTATTTTGTGCTATATTACCTTTAGCTAGTTACTT  
AGATAATAGTTTAACTGATTTATCTAATAAATCTGAATTATTTTAAATAAACTAACTAAATATAT  
TAAGATTATTATTTAATATATTTTCTATTTAAGATACTATTAATTTAGTATTTTGGGTTTTAGTTTA  
TAATTTATATTATATTATGCATTACCTCCACCTTGCTTTGTAGTAAGCTAATCTGTTATTTCTTTA  
GTTAATGGTAGAACAATGATCTTCTAATTCATTGGTTTTAGTTTGAATCTAAAAAGGAAATAAG

AAATATATTCTTATTATTACTTATATAATAATTATTTCTTAAAAATATACATTTTGCATTATAGCCGT  
TTAGCTGTATTAAAATGTAAAATGATATAAAATAGAATAAAATATTTAAATTATTCCTATGTTATATT  
ATCCTATATTGCAACCATTATCAGAAGTTGTATTAATACTTGTACCTGCCTTATTAGCTGTAGCTT  
ATGTTACAGTTGCTGAAAGAAAACTATGGCTAGTATGCAAAGAAGATTAGGTCCTAATGCTGT  
AGGTTACTATGGACTATTGCAAGCATTTGCTGATGCCTTAAAACTTTTATTAAGAATATGTAG  
CTCCTACACAATCTAATATTGTTCTTTTCTTTTAGGTCCTGTAATAACTTTAATTTTGCATTATTA  
GGTTACGCTGTTATACCCTATGGTCCTGGTTCAGGGATAAGCGACATGAATTTAGGTATATTTTA  
CATGTTAGCTGTGTCATCTTTAGCTACATACGGTATTCTATTAGCTGGTTGAAGTGCGAATAGTA  
AATACGCTTTTCTAGGTTCTCTTAGAAGTACAGCTCAATTAATTAGTTATGAATTAATATTAAGTT  
CAGCTATATTAATAGTAATTATGATAACAGGAAATTTAAATTTAACTGTTTGTACTGAATCTCAAA  
GAGCTATTTGATTTATACTACCTTTATTTCTGTGTTTATAATATTTTTCATAGGATCTATAGCTGA  
GACAAATAGAGCTCCTTTTGATTTAGCCGAGGCTAACCTGCTAATCTGGTTTGGTCTGGTTATAT  
GTCACAAATTGCTAGGAAACCTTTTTATTTAAAAACAAAAGACAATTAGCAGGAAACTTAATTT  
AACCTAATTAATAATTAGATAATTAACCTCTTCATAGACTAAACGTGACAATTTAATATATATA  
TATATTTATTTATATATATGATTAATAAGATATAGTCAATCATCGGTGTGAATCGACTTAAAAAA  
AAAAGCACATGGGTAAACCCATCTCCCTTATTAGGGGAATCAGAACTTGTTAGTGGGTTTCAT  
GACAGAGCATGCTGCCGTAGTTTTCGTATTCTTCTTTTAGCTGAGTACGGTAGTATTGTACTAAT  
GTGTATTTTAACTAGTATATTATTTATTGGTGGTTACTTATTATTTGAAATATCCTATGTTTTACTG  
TGGTAAATTATATTTTCTTTGAATTATTCTTTATAGACTGAGTAACATTTGTAGAGGTACAATCTTT  
ATACACTGATTTTTTAAATAATTCTATCATTGAAGGATTATTATATGGGTTTAACTAGGATTA  
AAGTTCTTTAATGATATTCACATTTATTTGAGCTAGAGCATCCTTCCCTAGAATACGATTTGATCA  
ACTAATGGGCTTCTGTTGAACAGTTTTATTACCTATTAATTTTGCAATTATTATATTAGTACCTTGT  
GTTTTATATAGTTTTAACTTATTACCTGTAAATATACCATTGTTCTAGCTCACACACCCGCCGCC  
CTACTGCCACAAGGCTACAGTACATATGAGGAGGGGAATAAGATCTAGAATACTATCCTAGTTA  
ATAATTACACTTAATAGTATACTAAATAGACCATCTATCATACTCGAGAATAGTGATAGTGTAAT  
TATACACTATTTTAACTGTATTCTACACTATTAGCATATTATTATCTTTATATGATAATAATTTTATA  
ACTTAATTTATTAGGTTACATTAACAAAAAATTCGTTAACTTTTTTCACCACTTTTAAACAAAAT  
ACGAATTTTA

>YN485

ATAACAATTCTAAAGAACATAAAGAGTTATTAGATAAAAAATAATTCACCTATACAGTTAATAAAT  
CAACTTAAAGGGTATTTTTTCATAAATCCTTATTAGCTTTAAGTTTAGCTATTACTATTTTCTCTTT  
TGCAGGTATTCTCCTCTTGTAGGGTTCTTTGCTAAACAGATGGTATTAAGCGCGGCTATTGATC  
AAGGTTATATCTTTTATCTTTAGTTGCAATATTAAGTGTATAGGAGGGGTTTATTATTTAAA  
TATAATTAAGAAATGTTCTTTTATTCACCTGACTATAAATTAACGAAGAAATTAATAAATAC  
TATTAATGGTCAAATTATTAATAGAAACAATAAAATATTAATGTTGAATTTAATTATACAAATGT  
AGTTATGTCTAGTTCTGTGGCAATAACTATTTCTACTATTACATTAGTAGTTTTATTATTCATGTTT  
ATGAATAAAGAATGATTAAGTCTGGGTACTATATTGGTACAATCTTTATTTAGCTATTAATGAGTA  
GTATGACATTATTTATAGGGTTGTATCTGTTATAGCTATTTTATTTTAGCCATTAATTTTATATTT  
GCTCCTCATAATCCTTATCAAGAAAAATATAGTATTTTCGAGTGTGGTTTCCATAGTTTTTTAGGG  
CAAAATAGAACACAATTCGGTATAAAATCTTTATTTTGCTTTAGTTTATTTACTTTTAGATTTAG  
AAATATTATTAACTTTCCCTTTCGCTCTTAGTGAGTATGTTAATGGTATTTATGGTCTTTTAGTTAC  
TTTAATTTTATAGCTATAATAACTATAGGATTTATATTTGAATTAGGTAAAAGCGCTCTTAAATA  
GACAGCAGACAAAATTATATATACCTAAATTGAACGTTAATTACCATACAGAGTATGTTGGAAT  
AGGTAAGGTTTCTAAGTAAAGTTATAGAGGCAGAAAACCAAAAAACCTACCAAGGGTAGCTA

ATGGGAAGCTATTA AAAAATAAAAGATGATAACCTATATATAGTATAGTTACTATATATTTACTATA  
ACTAGGATTATTATAAATATATATATTATCTTATTGTATATTAAGATTATTATTATAAGGTATA  
ATTAATATAGTATCTTATTGTATAAGAATATAATATATTAACCTATAATTAATTTTATTTTTAATTT  
TTAATTATAATTTTTTTTTATATCTAGATGCTTACACATCTACAGATGTAGAAGAGAACAAAATAT  
TGTTGTTATAGTAGTGGATGATATAGAAAAATATTTTTATATTATTTATTTTTGTTAGGTAGCTTTT  
GAAGTGTTTGATAGAGAGGATATATGGACGGTAGGAGGGTATTCATTTTAATGAACAGTGGATA  
GTTTAAATTAACCTAGTTATAGTTTATGAATTTAAATTATAATTATATTAATGTAGGTTATGATAGA  
ATTATGTATTGATCCTTAAGAGTTAAGAGAGATACGCCCACGTATAATACATATTGGTTTAGGGT  
TGAGTATATATACTTAAGAGTTAAGAATATATATATACAATATATAATAAATATAGTAATATATTA  
ATGGTATGGACTTAACCAGGTTTATATATTATCATTTGATAAACATTAATTATAATTTTTCTATTTA  
TTATTATTATTACTGTGAGATTAATAATTATTA AAAATATAATATTACATAGTACGTGATATTTGG  
GGATTTTATCTTATTAATTGGCAATTAATGATTCTAATCAAATTTTATTCTCTTTAGTTTAATGGTA  
GAACAATGATCTTCTAATTCATTGGTTTTAGTTTCGATTCTAAAAAGAGATGAGTAAATAATTTTCT  
AGATCAGAAATACTACTTTTAACTACAAAAAGCTTACGCTTTTAAACATTTTTTTGATAAATAACA  
ACTATTGTTAATATTTGGCTGTCTATTGGTTTAACTAACAATTACAAAATTTTTCAATTTTTATAAT  
ATAAATTTAAATGAGAATATTA AAAAGTCATTCATTATTA AAATTAGTGAATTCCTACCTTATCGA  
TGCGTCACAACCAAGTAACATTAGTTACTTGTGAAATTTTGGTTCATTATTAGCTGTTTGTTAAT  
AGTACAAATTATTACCGGTATTACATTAGCTATGCATTATAGTCCTAGTGAATGGAAGCTTTTAA  
CTCAATAGAGCATATAATGAGAGATGTTAATAACGGGTGATTAGTTCGTTATCTACATAGTAATA  
CAGCTTCTGCTTTCTTTTTCTTAGTGTATTTACACATAGGAAGAGGTATATATTACGGATCATATA  
GAGCTCCTCGTACTTTAGTTTGAGCTATTGGTACTGTTATATTAATTAATGATGGCTATCGGTT  
TCCTAGGTTATGTTTTACCTTATGGACAGATGTCATTATGAGGTGCTACAGTTATTACTAATCTTA  
TTAGTGCTATACCTGAATAGGGCAAGATATTGTTGAATTCATTTGAGGTGGTTTTCTGTTAATA  
ATGCCACTTTAAACAGATTTTTTGCAATTACATTTGTATTGCCTTTTGTATTAGCTGCTTTAGTTTAA  
ATGCACTTAATTGCACTTCATGATACTGCTGGTTCAAGCAATCCTCTGGTGTTTCAGGTAATTAC  
GATAGAATTACATTTGCTCCATATTTTTATTTAAAGATTTAATTACTATTTTTATATTTATTTTTGTA  
TTAAGTGCTTTTGTATTCTTTATGCCTAATGTTTTAGGGGATAGTGATAATTATATTATGGCTAATC  
CTATGCCAACTCCTGCTGCTATTGTACCTGAATGATACTTATTACCTTTCTATGCTATTTTAAAGATC  
TATACCTAATAAATTATTAGGTGTTATAGCGATGTTTAGTGCTATTTTAGCTATTATGTTATTACCT  
GTTACAGATTTAGGTAGATCTAGAGGTTTACAATTTAGACCATTTAGTAAATAGCTTTCTGAGTT  
TTTGTTGCTAATTTCTTAGTTTAAATGCAATTAGGTGCTAAACACGTTGAAGATCCATTTATATTAT  
TAGGTCAATTAAGTACTGTATTATACTTTAGTTATTTTGTTGCTATATTACCTTTAGCTAGTTACTT  
AGATAATAGTTTAACTGATTTATCTAATAAATCTGAATTATTTTAAATAAACTAACTAAATATAT  
TAAGATTATTATTTAATATATTTTCTATTTAAGATACTATTAATTTAGTATTTTGGGTTTTCAGTTTA  
TAATTTATATTATATTATGCATTACCCTCCACCTTGCTTTGTAGTAAGCTAATCTGTTATTTCTTTA  
GTTTAATGGTAGAACAATGATCTTCTAATTCATTGGTTTTAGTTTGAATCTAAAAAGGAAATAAG  
AAATATATTCTTATTATTACTTATATAATAATTATTTCTTAAAAATATACATTTTGCATTATAGCCGT  
TTAGCTGTATTA AAATGTAAATGATATAAAATAGAATAAATATTTAAATTATTCCTATGTTATATT  
ATCCTATATTGCAACCATTATCAGAAGTTGTATTAATACTTGTACCTGCCTTATTAGCTGTAGCTT  
ATGTTACAGTTGCTGAAAGAAAACTATGGCTAGTATGCAAAGAAGATTAGGTCCTAATGCTGT  
AGGTTACTATGGACTATTGCAAGCATTTGCTGATGCCTTAAACTTTTATTA AAAGAATATGTAG  
CTCCTACACAATCTAATATTGTTCTTTTCTTTTAGGTCCTGTAATAACTTTAATTTTTGCATTATTA  
GGTTACGCTGTTATACCCTATGGTCCTGGTTCAGGGATAAGCGACATGAATTTAGGTATATTTTA  
CATGTTAGCTGTGTCATCTTTAGCTACATACGGTATTCTATTAGCTGGTTGAAGTGCGAATAGTA

AATACGCTTTTCTAGGTTCTCTTAGAAGTACAGCTCAATTAATTAGTTATGAATTAATATTAAGTT  
CAGCTATATTAATAGTAATTATGATAACAGGAAATTTAAATTTAACTGTTTGTACTGAATCTCAAA  
GAGCTATTTGATTTATACTACCTTTATTTCTGTGTTTATAATATTTTTCATAGGATCTATAGCTGA  
GACAAATAGAGCTCCTTTTGATTTAGCCGAGGCTAACCTGCTAATCTGGTTTGGTCTGGTTATAT  
GTCACAAATTGCTAGGAAACCTTTTTATTTTAAAAACAAAAGACAATTAGCAGGAACTTAATTT  
AACCTAATTAATAATATTAGATAATTAACTCTTCATAGACTAAACGTGACAATTTAATATATATA  
TATATTTATTTATATATATGATTAAATAAGATATAGTCAATCATCGGTGTGAATCGACTTAAAAAA  
AAAAGCACATGGGTAAACCCATCTCCCCTTATTAGGGGAATCAGAACTTGTTAGTGGGTTTCAT  
GACAGAGCATGCTGCCGTAGTTTTCGTATTCTTCTTTTGTAGCTGAGTACGGTAGTATTGTACTAAT  
GTGTATTTTAACTAGTATATTATTTATTGGTGGTTACTTATTATTTGAAATATCCTATGTTTTTACTG  
TGGTAAATTATATTTTCTTTGAATTATTCTTTATAGACTGAGTAACATTTGTAGAGGTACAATCTTT  
ATACACTGATTTTTTAAATAATTCTATCATTGAAGGATTATTATATGGGTTTAACTAGGATTA  
AAGTTCTTTAATGATATTCACATTTATTTGAGCTAGAGCATCCTTCCCTAGAATACGATTTGATCA  
ACTAATGGGCTTCTGTTGAACAGTTTTATTACCTATTAATTTTGAATTATTATATTAGTACCTTGT  
GTTTTATATAGTTTTAACTTATTACCTGTAAATATACCATTGTTCTAGCTCACACACCCGCCGCC  
CTACTGCCACAAGGCTACAGTACATATGAGGAGGGGAATAAGATCTAGAATACTATCCTAGTTA  
ATAATTACACTTAATAGTATACTAAATAGACCATCTATCATACTCGAGAATAGTGATAGTGAAT  
TATACACTATTTTAACTGTATTCTACACTATTAGCATATTATTATCTTTATATGATAATAATTTTATA  
ACTTAATTTATTAGGTTACATTAACAAAAAATTCGTTAACTTTTTTCACCACTTTTTAATACAAAAT  
ACGAATTTTA

>YN487

ATAACAATTCTAAAGAACATAAAGAGTTATTAGATAAAAAATAATTCACCTATACAGTTAATAAAT  
CAACTTAAAGGGTATTTTTTCATAAATCCTTTATTAGCTTTAAGTTTAGCTATTACTATTTTCTCTTT  
TGCAGGTATTCTCCTCTTGTAGGGTCTTTGCTAAACAGATGGTATTAAGCGCGGCTATTGATC  
AAGGTTATATCTTTTTATCTTTAGTTGCAATATTAAGTGTATAGGAGGGGTTTATTATTTAAA  
TATAATTAAGAAATGTTCTTTTATTCACCTGACTATAAATTAACGAAGAAATTAATAAATAC  
TATTAATGGTCAAATTATTAATAGAAACAATAAAATATTAATGTTGAATTTAATTATACAAATGT  
AGTTATGTCTAGTTCTGTGGCAATAACTATTTCTACTATTACATTAGTAGTTTTATTATTCATGTTT  
ATGAATAAAGAATGATTAAGTCTGGGTACTATATTGGTACAATCTTTATTTAGCTATTAATGAGTA  
GTATGACATTATTTATAGGGTTGTATCTGTTATAGCTATTTTATTTTGTAGCCATTAATTTATATTT  
GCTCCTCATAATCCTTATCAAGAAAAATATAGTATTTTCGAGTGTGGTTTCCATAGTTTTTTAGGG  
CAAAATAGAACACAATTCGGTATAAAATTCCTTTATTTTGTCTTAGTTTATTTACTTTTAGATTTAG  
AAATATTATTAACTTTCCCTTTCGCTCTTAGTGAGTATGTTAATGGTATTTATGGTCTTTTAGTTAC  
TTTAATTTTTTATAGCTATAATAACTATAGGATTTATATTTGAATTAGGTAAAAGCGCTCTTAAATA  
GACAGCAGACAAAAATTATATATACCTAAATTGAACGTTAATTACCATACAGAGTATGTTGGAAT  
AGGTAAGGTTTCTAAGTAAAGTTATAGAGGCAGAAAACCAAAAAACCTACCAAAGGGTAGCTA  
ATGGGAAGCTATTAATAAATAAAGATGATAACCTATATATAGTATAGTTACTATATATTTACTATA  
ACTAGGATTATTATATATATATATATTATCTTATTGTATATTAAGATTATTATTATAAGGTATA  
ATTAATATAGTATCTTATTGTATAAGAATATAATATATTAACCTATAATTAATTTTATTTTTAATTT  
TTAATTATAATTTTTTTTTATATCTAGATGCTTACACATCTACAGATGTAGAAGAGAACAAAATAT  
TGTTGTTATAGTAGTGATATAGAAAAATATTTTTATATTATTTATTTTGTAGGTAGCTTTT  
GAAGTGTTGATAGAGAGGATATATGGACGGTAGGAGGGTATTCATTTTAATGAACAGTGGATA  
GTTTAAATTAACCTAGTTATAGTTTATGAATTTAAATTATAATTATTAATGTAGGTTATGATAGA  
ATTATGTATTGATCCTTAAGAGTTAAGAGAGATACGCCACGTATAATACATATTGGTTTAGGGT

TGAGTATATATACTTAAGAGTTAAGAATATATATATACAATATATAATAAATATAGTAATATATTA  
ATGGTATGGACTTAACCAGGTTTATATATTATCATTTGATAAACATTAATTATAATTTTTCTATTTA  
TTATTATTATTACTGTGAGATTAATAATTATTAATAATATTACATAGTACGTGATATTTGG  
GGATTTTATCTTATTAATTGGCAATTAATGATTCTAATCAAATTTTATTCTCTTTAGTTTAAATGGTA  
GAACAATGATCTTCTAATTCATTGGTTTTAGTTCGATTCTAAAAAGAGATGAGTAAATAATTTTCT  
AGATCAGAAATACTACTTTTAACTACAAAAAGCTTACGCTTTTTAACATTTTTTGATAAATAACA  
ACTATTGTTAATATTTGGCTGTCTATTGGTTTAACTAACAATTACAAAATTTTTCAATTTTTATAAT  
ATAAATTTAAATGAGAATATTAATAAGTCATTATTATTAATAATTAGTGAATCTTACCTTATCGA  
TGCGTCACAACCAAGTAACATTAGTTACTTGTGAAATTTTGGTTCATTATTAGCTGTTTGTTAAT  
AGTACAAATTATTACCGGTATTACATTAGCTATGCATTATAGTCCTAGTGAATGGAAGCTTTTAA  
CTCAATAGAGCATATAATGAGAGATGTTAATAACGGGTGATTAGTTCGTTATCTACATAGTAATA  
CAGCTTCTGCTTTCTTTTTCTTAGTGTATTTACACATAGGAAGAGGTATATATTACGGATCATATA  
GAGCTCCTCGTACTTTAGTTTGAGCTATTGGTACTGTTATTAATTAATGATGGCTATCGGTT  
TCCTAGGTTATGTTTTACCTTATGGACAGATGTCATTATGAGGTGCTACAGTTATTACTAATCTTA  
TTAGTGCTATACCTGAATAGGGCAAGATATTGTTGAATTCATTGAGGTGGTTTTCTGTTAATA  
ATGCCACTTTAAACAGATTTTTGCATTACATTTGTATTGCCTTTGTATTAGCTGCTTAGTTTTA  
ATGCACTTAATTGCACTTCATGATACTGCTGGTTCAAGCAATCCTCTTGGTGTTTCAGGTAATTAC  
GATAGAATTACATTTGCTCCATATTTTTATTTAAAGATTTAATTACTATTTTTATTTATTTTTGTA  
TTAAGTGCTTTTGATTCTTTATGCCTAATGTTTTAGGGGATAGTGATAATTATATTATGGCTAATC  
CTATGCCAACTCCTGCTGCTATTGTACCTGAATGATACTTATTACCTTTCTATGCTATTTTAAGATC  
TATACCTAATAAATTATTAGGTGTTATAGCGATGTTTAGTGCTATTTAGCTATTATGTTATTACCT  
GTTACAGATTTAGGTAGATCTAGAGGTTTACAATTTAGACCATTTAGTAAATAGCTTTCTGAGTT  
TTTGTTGCTAATTTCTTAGTTTTAATGCAATTAGGTGCTAAACACGTTGAAGATCCATTATATTAT  
TAGGTCAATTAAGTACTGTATTATACTTTAGTTATTTTTGTTGCTATATTACCTTTAGCTAGTTACTT  
AGATAATAGTTTAACTGATTTATCTAATAAATCTGAATTATTTTAAATAAACTAACTAAATATAT  
TAAGATTATTATTTAATATATTTTCTATTTAAGATACTATTAATTTAGTATTTTGGGTTTTAGTTTA  
TAATTTATATTATATTATGCATTACCCTCCACCTTGCTTTGTAGTAAGCTAATCTGTTATTTCTTTA  
GTTTAATGGTAGAACAATGATCTTCTAATTCATTGGTTTTAGTTCGAATCTAAAAAGGAAATAAG  
AAATATATTCTTATTATTACTTATATAATAATTATTTCTTAAAAATATACATTTTGCATTATAGCCGT  
TTAGCTGTATTAAATGTAAATGATATAAAATAGAATAAATATTTAAATTATTCCTATGTTATATT  
ATCCTATATTGCAACCATTATCAGAAGTTGATTAATACTTGTACCTGCCTTATTAGCTGTAGCTT  
ATGTTACAGTTGCTGAAAGAAAACTATGGCTAGTATGCAAAGAAGATTAGGTCCTAATGCTGT  
AGGTTACTATGGACTATTGCAAGCATTGCTGATGCCTTAAACTTTTTATTAAGAATATGTAG  
CTCCTACACAATCTAATATTGTTCTTTCTTTTAGGTCCTGTAATAACTTTAATTTTTGCATTATTA  
GGTTACGCTGTTATACCCTATGGTCCTGGTTCAGGGATAAGCGACATGAATTTAGGTATATTTTA  
CATGTTAGCTGTGTCATCTTTAGCTACATACGGTATTCTATTAGCTGGTTGAAGTGCGAATAGTA  
AATACGCTTTCTAGGTTCTCTTAGAAGTACAGCTCAATTAATTAGTTATGAATTAATATTAAGTT  
CAGCTATATTAATAGTAATTATGATAACAGGAAATTTAAATTTAACTGTTTGTACTGAATCTCAAA  
GAGCTATTTGATTTATACTACCTTTATTTCTGTGTTTATAATTTTTTCATAGGATCTATAGCTGA  
GACAAATAGAGCTCCTTTGATTTAGCCGAGGCTAACCTGCTAATCTGGTTTGGTCTGGTTATAT  
GTCACAAATTGCTAGGAAACCTTTTTATTTAAAAACAAAAGACAATTAGCAGGAACTTAATTT  
AACCTAATTAATAATATTAGATAATTAACTCTTCATAGACTAAACGTGACAATTTAATATATATA  
TATATTTATTTATATATATGATTAAATAAGATATAGTCAATCATCGGTGTGAATCGACTTAAAAAA  
AAAAGCACATGGGTAAACCCATCTCCCCTTATTAGGGGAATCAGAACTTGTTAGTGGGTTTAT

GACAGAGCATGCTGCCGTAGTTTTCGTATTCTTCTTTTAGCTGAGTACGGTAGTATTGTACTAAT  
GTGTATTTAACTAGTATATTATTTATTGGTGGTTACTTATTATTTGAAATATCCTATGTTTTACTG  
TGGTAAATTATATTTTCTTTGAATTATTCTTTATAGACTGAGTAACATTTGTAGAGGTACAATCTTT  
ATACACTGATTTTTTAAATAATTCTATCATTGAAGGATTATTATATGGGTTTAATCTAGGATTAAA  
AAGTTCTTTAATGATATTCACATTTATTTGAGCTAGAGCATCCTTCCCTAGAATACGATTTGATCA  
ACTAATGGGCTTCTGTTGAACAGTTTTATTACCTATTAATTTTGCAATTATTATATTAGTACCTTGT  
GTTTTATATAGTTTTAACTTATTACCTGTAAATATACCATTGTTCTAGCTCACACACCCGCCGCC  
CTACTGCCACAAGGCTACAGTACATATGAGGAGGGGAATAAGATCTAGAATACTATCCTAGTTA  
ATAATTACACTTAATAGTATACTAAATAGACCATCTATCATACTCGAGAATAGTGATAGTGTAAT  
TATACACTATTTTAACTGTATTCTACACTATTAGCATATTATTATCTTTATATGATAATAATTTTATA  
ACTTAATTTATTAGGTTACATTAACAAAAAATTCGTTAACTTTTTTCACCACTTTTAAATACAAAAT  
ACGAATTTTA

>YN490

ATAACAATTCTAAAGAACATAAAGAGTTATTAGATAAAAAATAATTCACCTATACAGTTAATAAAT  
CAACTTAAAGGGTATTTTTTCATAAATCCTTTATTAGCTTTAAGTTTAGCTATTACTATTTTCTCTTT  
TGCAGGTATTCCTCCTCTGTAGGGTTCTTTGCTAAACAGATGGTATTAAGCGCGGCTATTGATC  
AAGGTTATATCTTTTTATCTTTAGTTGCAATATTAAGTGTATAGGAGGGGTTTATTATTTAAA  
TATAATTAAGAAATGTTCTTTTATTCACCTGACTATAAATTAACGAAGAAATTAATAAATAC  
TATTAATGGTCAAATTATTAATAGAAACAATAAAATATTAAATGTTGAATTTAATTATACAAATGT  
AGTTATGTCTAGTTCTGTGGCAATAACTATTTCTACTATTACATTAGTAGTTTTATTATTCATGTTT  
ATGAATAAAGAATGATTAAGTCTGGGTACTATATTGGTACAATCTTTATTTAGCTATTAATGAGTA  
GTATGACATTATTTATAGGGTTTGTATCTGTTATAGCTATTTTATTTTAGCCATTAATTTTATATTT  
GCTCCTCATAATCCTTATCAAGAAAAATATAGTATTTTCGAGTGTGGTTTCCATAGTTTTTTAGGG  
CAAAATAGAACACAATTCGGTATAAAATTCCTTTATTTTTGCTTTAGTTTATTTACTTTTAGATTTAG  
AAATATTATTAACTTTCCCTTTCGCTCTTAGTGAGTATGTTAATGGTATTTATGGTCTTTTAGTTAC  
TTTAATTTTTATAGCTATAATAACTATAGGATTTATATTTGAATTAGGTAAAAGCGCTCTTAAATA  
GACAGCAGACAAAAATTATATATACCTAAATTGAACGTTAATTACCATACAGAGTATGTTGGAAT  
AGGTAAGGTTTCTAAGTAAAGTTATAGAGGCAGAAAACCAAAAAACCTACCAAAGGGTAGCTA  
ATGGGAAGCTATTAATAAATAAAGATGATAACCTATATATAGTATAGTTACTATATATTTACTATA  
ACTAGGATTATTATATATATATATATTATCTTATTGTATATTAAGATTATTATTATAAGGTATA  
ATTAATATAGTATCTTATTGTATAAGAATATAATATATTAACCTATAATTAATTTTATTTTTTAATTT  
TTAATTATAATTTTTTTTTATATCTAGATGCTTACACATCTACAGATGTAGAAGAGAACAAAATAT  
TGTTGTTATAGTAGTGGATGATATAGAAAAATATTTTTATATTATTTATTTTGTAGGTAGCTTTT  
GAAGTGTGATAGAGAGGATATATGGACGGTAGGAGGGTATTCATTTTAATGAACAGTGGATA  
GTTTAAATTAACCTAGTTATAGTTTATGAATTTAAATTATAATTATATTAATGTAGGTATGATAGA  
ATTATGTATTGATCCTTAAGAGTTAAGAGAGATACGCCACGTATAATACATATTGGTTTAGGGT  
TGAGTATATATACTTAAGAGTTAAGAATATATATATACAATATATAATAAATATAGTAATATATTA  
ATGGTATGGACTTAACCAGGTTTATATATTATCATTTGATAAACATTAATTATAATTTTTCTATTTA  
TTATTATTATTACTGTGAGATTAATAATTATTAATAATATTACATAGTACGTGATATTTGG  
GGATTTTATCTTATTAATTGGCAATTAATGATTCTAATCAAATTTTATTCTCTTTAGTTTAAATGGTA  
GAACAATGATCTTCTAATTCATTGGTTTTAGTTTCGATTCTAAAAAGAGATGAGTAAATAATTTTCT  
AGATCAGAAATACTACTTTTAACTACAAAAAGCTTACGCTTTTTAACATTTTTTTGATAAATAACA  
ACTATTGTTAATATTTGGCTGTCTATTGGTTTAACTACAATTACAAAATTTTTCAATTTTTATAAT  
ATAAATTTAAATGAGAATATTAATAAAGTCATTCATTATTAATAATTAGTGAATTCCTACCTTATCGA

TGCGTCACAACCAAGTAACATTAGTTACTTGTGAAATTTTGGTTCATTATTAGCTGTTTGTTAAT  
AGTACAAATTATTACCGGTATTACATTAGCTATGCATTATAGTCCTAGTGTAATGGAAGCTTTTAA  
CTCAATAGAGCATATAATGAGAGATGTTAATAACGGGTGATTAGTTCGTTATCTACATAGTAATA  
CAGCTTCTGCTTTCTTTTCTTAGTGATTTACACATAGGAAGAGGTATATATTACGGATCATATA  
GAGCTCCTCGTACTTTAGTTTGAGCTATTGGTACTGTTATTAATTAATGATGGCTATCGGT  
TCCTAGGTTATGTTTACCTTATGGACAGATGTCATTATGAGGTGCTACAGTTACTAATCTTA  
TTAGTGCTATACCTGAATAGGGCAAGATATTGTTGAATTCATTTGAGGTGGTTTTCTGTTAATA  
ATGCCACTTTAAACAGATTTTTGCATTACATTTGTATTGCCTTTGTATTAGCTGCTTAGTTTTA  
ATGCACTTAATTGCACTTCATGATACTGCTGGTTCAAGCAATCCTCTGGTGTTTCAGGTAATTAC  
GATAGAATTACATTTGCTCCATATTTTTATTTAAAGATTTAATTACTATTTTTATTTATTTTTGTA  
TTAAGTGCTTTGTATTCTTTATGCCTAATGTTTAGGGGATAGTGATAATTATATTATGGCTAATC  
CTATGCAAACCTCCTGCTGCTATTGTACCTGAATGATACTTATTACCTTTCTATGCTATTTAAGATC  
TATACCTAATAAATTATTAGGTGTTATAGCGATGTTTAGTGCTATTTAGCTATTATGTTATTACCT  
GTTACAGATTTAGGTAGATCTAGAGGTTTACAATTTAGACCATTTAGTAAATAGCTTTCTGAGTT  
TTTGTTGCTAATTTCTTAGTTTTAATGCAATTAGGTGCTAAACACGTTGAAGATCCATTTATATTAT  
TAGGTCAATTAAGTACTGTATTATACTTTAGTTATTTTGTTGCTATATTACCTTTAGCTAGTTACTT  
AGATAATAGTTTAACTGATTTATCTAATAAATCTGAATTATTTTAAATAAAACTAACTAAATATAT  
TAAGATTATTATTTAATATATTTTCTATTTAAGATACTATTAATTTAGTATTTTGGGTTTTAGTTTA  
TAATTTATATTATATTATGCATTACCCTCCACCTTGCTTTGTAGTAAGCTAATCTGTTATTTCTTTA  
GTTTAATGGTAGAACAATGATCTTCTAATTCATTGGTTTTAGTTTGAATCTAAAAAGGAAATAAG  
AAATATATTCTTATTATTACTTATATAATAATTATTTCTTAAAAATATACATTTTGCAATTATAGCCGT  
TTAGCTGTATTTAAATGTAAATGATATAAAATAGAATAAATATTTAAATTATTCCTATGTTATATT  
ATCCTATATTGCAACCATTATCAGAAGTTGTATTAATACTTGTACCTGCCTTATTAGCTGTAGCTT  
ATGTTACAGTTGCTGAAAGAAAACTATGGCTAGTATGCAAAGAAGATTAGGTCCTAATGCTGT  
AGGTTACTATGGACTATTGCAAGCATTGCTGATGCCTTAAACTTTTATTTAAAGAATATGTAG  
CTCCTACACAATCTAATATTGTTCTTTTCTTTTAGGTCTGTAAATAACTTTAATTTTGCAATTATA  
GGTTACGCTGTTATACCCTATGGTCCTGGTTCAGGGATAAGCGACATGAATTTAGGTATATTTTA  
CATGTTAGCTGTGTCATCTTTAGCTACATACGGTATTCTATTAGCTGGTTGAAGTGCGAATAGTA  
AATACGCTTTTCTAGGTTCTCTTAGAAGTACAGCTCAATTAATTAGTTATGAATTAATATTAAGTT  
CAGCTATATTAATAGTAATTATGATAACAGGAAATTTAAATTTAACTGTTTGACTGAATCTCAAA  
GAGCTATTTGATTTATACTACCTTTATTTCTGTGTTTATAATATTTTTCATAGGATCTATAGCTGA  
GACAAATAGAGCTCCTTTGATTTAGCCGAGGCTAACCTGCTAATCTGGTTTGGTCTGGTTATAT  
GTCACAAATTGCTAGGAAACCTTTTTATTTAAAAACAAAAGACAATTAGCAGGAAACTTAATTT  
AACCTAATTAATAAATTATTAGATAAATAAATCTTTCATAGACTAAACGTGACAATTTAATATATATA  
TATATTTATTTATATATATGATTAATAAGATATAGTCAATCATCGGTGTGAATCGACTTAAAAAA  
AAAAGCACATGGGTAAACCCATCTCCCCTTATTAGGGGAATCAGAACTTGTTAGTGGGTTTCAT  
GACAGAGCATGCTGCCGTAGTTTTCGTATTCTTCTTTTAGCTGAGTACGGTAGTATTGTACTAAT  
GTGTATTTTAACTAGTATATTATTTATTGGTGGTTACTTATTATTTGAAATATCCTATGTTTTACTG  
TGGTAAATTATATTTTCTTTGAATTATCTTTATAGACTGAGTAACATTTGTAGAGGTACAATCTTT  
ATACACTGATTTTTTAAATAATTCTATCATTGAAGGATTATTATATGGGTTAATCTAGGATTAAA  
AAGTTCTTTAATGATATTCACATTTATTTGAGCTAGAGCATCCTTCCCTAGAATACGATTTGATCA  
ACTAATGGGCTTCTGTTGAACAGTTTTATTACCTATTAATTTTGCAATTATTATATTAGTACCTTGT  
GTTTTATATAGTTTTAACTTATTACCTGTAAATATACCATTGTTCTAGCTCACACACCCGCCGCC  
CTACTGCCACAAGGCTACAGTACATATGAGGAGGGGAAGTAAAGATCTAGAAGTATCCTAGTTA

ATAATTACACTTAATAGTATACTAAATAGACCATCTATCATACTCGAGAATAGTGATAGTGTAAT  
TATACACTATTTTAACTGTATTCTACACTATTAGCATATTATTATCTTTATATGATAATAATTTTATA  
ACTTAATTTATTAGGTTACATTAACAAAAAATTCGTTAACTTTTTTCACCACTTTTAAATACAAAAT  
ACGAATTTTA

>YN540

ATAACAATTCTAAAGAACATAAAGAGTTATTAGATAAAAAATAATTCACCTATACAGTTAATAAAT  
CAACTTAAAGGGTATTTTTTCATAAATCCTTTATTAGCTTTAAGTTTAGCTATTACTATTTTCTCTTT  
TGCAGGTATTCCTCCTCTGTAGGGTTCTTTGCTAAACAGATGGTATTAAGCGCGGCTATTGATC  
AAGGTTATATCTTTTTATCTTTAGTTGCAATATTAAGTGTATAGGAGGGGTTTATTATTTAAA  
TATAATTAAGAAATGTTCTTTTATTCACCTGACTATAAATTAACGAAGAAATTAATAAATAC  
TATTAATGGTCAAATTATTAATAGAAACAATAAATATTAATGTTGAATTTAATTATACAAATGT  
AGTTATGTCTAGTTCTGTGGCAATAACTATTTCTACTATTACATTAGTAGTTTTATTATTCATGTTT  
ATGAATAAAGAATGATTAAGTCTGGGTACTATATTGGTACAATCTTTATTTAGCTATTAATGAGTA  
GTATGACATTATTTATAGGGTTTGTATCTGTTATAGCTATTTTATTTTAGCCATTAATTTTATATTT  
GCTCCTCATAATCCTTATCAAGAAAAATATAGTATTTTCGAGTGTGGTTTCCATAGTTTTTTAGGG  
CAAAATAGAACACAATTCGGTATAAAATCCTTATTTTGTCTTAGTTTATTTACTTTTAGATTTAG  
AAATATTATTAACTTCCCTTTCGCTCTTAGTGAGTATGTTAATGGTATTTATGGTCTTTTAGTTAC  
TTTAATTTTATAGCTATAATAACTATAGGATTTATATTTGAATTAGGTAAAAGCGCTCTTAAATA  
GACAGCAGACAAAAATTATATATACCTAAATTGAACGTTAATTACCATACAGAGTATGTTGGAAT  
AGGTAAGGTTTCTAAGTAAAGTTATAGAGGCAGAAAACCAAAAAACCTACCAAAGGGTAGCTA  
ATGGGAAGCTATTAATAAAGATGATAACCTATATATAGTATAGTTACTATATATTTACTATA  
ACTAGGATTATTATATATATATATTATCTTATTGTATATTAAGATTATTATTATTATAAGGTATA  
ATTAATATAGTATCTTATTGTATAAGAATATAATATATTAACCTATAATTAATTTTATTTTAAATTT  
TTAATTATAATTTTTTTTTTATATCTAGATGCTTACACATCTACAGATGTAGAAGAGAACAAAATAT  
TGTTGTTATAGTAGTGGATGATATAGAAAAATATTTTTATATTATTTATTTTGTAGGTAGCTTTT  
GAAGTGTTTGATAGAGAGGATATATGGACGGTAGGAGGGTATTCATTTTAATGAACAGTGGATA  
GTTTAAATTAACCTAGTTATAGTTTATGAATTTAAATTATAATTATATTAATGTAGGTTATGATAGA  
ATTATGTATTGATCCTTAAGAGTTAAGAGAGATACGCCACGTATAATACATATTGGTTTAGGGT  
TGAGTATATATACTTAAGAGTTAAGAATATATATATACAATATATAATAAATATAGTAATATATTA  
ATGGTATGGACTTAACCAGGTTTATATATTATCATTGATAAACATTAATTATAATTTTTCTATTTA  
TTATTATTATTACTGTGAGATTAATAATTATTAATAATATTACATAGTACGTGATATTTGG  
GGATTTTATCTTATTAATTGGCAATTAATGATTCTAATCAAATTTTATTCTCTTTAGTTTAATGGTA  
GAACAATGATCTTCTAATTCATTGGTTTTAGTTTCGATTCTAAAAAGAGATGAGTAAATAATTTTCT  
AGATCAGAAATACTACTTTTAACTACAAAAAGCTTACGCTTTTAAACATTTTTTTGATAAATAACA  
ACTATTGTTAATATTTGGCTGTCTATTGGTTTAACTAACAATTACAAAATTTTTCAATTTTTATAAT  
ATAAATTTAAATGAGAATATTAAAAAGTCATTATTAAAAATTAGTGAATTCTTACCTTATCGA  
TGCCTCACAACCAAGTAACATTAGTTACTTGTGAAATTTTGGTTCATTATTAGCTGTTTGTAAAT  
AGTACAAATTATTACCGGTATTACATTAGCTATGCATTATAGTCCTAGTGAATGGAAGCTTTTAA  
CTCAATAGAGCATATAATGAGAGATGTTAATAACGGGTGATTAGTTCGTTATCTACATAGTAATA  
CAGCTTCTGCTTTCTTTTCTTAGTGTATTTACACATAGGAAGAGGTATATATTACGGATCATATA  
GAGCTCCTCGTACTTTAGTTTGAGCTATTGGTACTGTTATATTAATTAATGATGGCTATCGGTT  
TCCTAGGTTATGTTTTACCTTATGGACAGATGTCATTATGAGGTGCTACAGTTATTACTAATCTTA  
TTAGTGCTATACCTGAATAGGGCAAGATATTGTTGAATTCATTTGAGGTGGTTTTCTGTAAATA  
ATGCCACTTAAACAGATTTTTTGCATTACATTTGTATTGCCTTTGTATTAGCTGCTTTAGTTTAA

ATGCACTTAATTGCACTTCATGATACTGCTGGTTCAAGCAATCCTCTTGGTGTTTCAGGTAATTAC  
GATAGAATTACATTTGCTCCATATTTTTATTTAAAGATTTAATTACTATTTTTATATTTATTTTTGTA  
TTAAGTGCTTTTGTATTCTTTATGCCTAATGTTTTAGGGGATAGTGATAATTATATTATGGCTAATC  
CTATGCAAACCTCCTGCTGCTATTGTACCTGAATGATACTTATTACCTTTCTATGCTATTTTAAGATC  
TATACCTAATAAATTATTAGGTGTTATAGCGATGTTTAGTGCTATTTTAGCTATTATGTTATTACCT  
GTTACAGATTTAGGTAGATCTAGAGGTTTACAATTTAGACCATTTAGTAAAATAGCTTTCTGAGTT  
TTTGTGCTAATTTCTTAGTTTTAATGCAATTAGGTGCTAAACACGTTGAAGATCCATTTATATTAT  
TAGGTCAATTAAGTACTGTATTATACTTTAGTTATTTTTGTTGCTATATTACCTTTAGCTAGTACTT  
AGATAATAGTTTAACTGATTTATCTAATAAATCTGAATTATTTTTAAATAAACTAACTAAATATAT  
TAAGATTATTATTTAATATATTTTCTATTTAAGATACTATTAATTTAGTATTTTGGGTTTTCAGTTTA  
TAATTTATATTATATTATGCATTACCCTCCACCTTGCTTTGTAGTAAGCTAATCTGTTATTTCTTTA  
GTTTAATGGTAGAACAATGATCTTCTAATTCATTGGTTTTAGTTCGAATCTAAAAAGGAAATAAG  
AAATATATTCTTATTATTACTTATATAATAATTATTTCTTAAAAATATACATTTTGCAATTATAGCCGT  
TTAGCTGTATTAATAATGTAAATGATATAAAATAGAATAAATATTTAAATTATTCCTATGTTATATT  
ATCCTATATTGCAACCATTATCAGAAGTTGTATTAATACTTGTACCTGCCTTATTAGCTGTAGCTT  
ATGTTACAGTTGCTGAAAGAAAACTATGGCTAGTATGCAAAGAAGATTAGGTCCTAATGCTGT  
AGGTTACTATGGACTATTGCAAGCATTTGCTGATGCCTTAAACCTTTTATTAAGAATATGTAG  
CTCCTACACAATCTAATATTGTTCTTTTCTTTTAGGTCCTGTAATAACTTTAATTTTGCATTATTA  
GGTTACGCTGTTATACCCTATGGTCCTGGTTCAGGGATAAGCGACATGAATTTAGGTATATTTTA  
CATGTTAGCTGTGTCATCTTTAGCTACATACGGTATTCTATTAGCTGGTTGAAGTGCGAATAGTA  
AATACGCTTTTCTAGGTTCTCTTAGAAGTACAGCTCAATTAATTAGTTATGAATTAATTAAGTT  
CAGCTATATTAATAGTAATTATGATAACAGGAAATTTAAATTTAACTGTTTGTACTGAATCTCAAA  
GAGCTATTTGATTTATACTACCTTTATTTCTGTGTTTATAATATTTTTCATAGGATCTATAGCTGA  
GACAAATAGAGCTCCTTTTGATTTAGCCGAGGCTAACCTGCTAATCTGGTTTGGTCTGGTTATAT  
GTCACAAATTGCTAGGAAACCTTTTTATTTAAAAACAAAAGACAATTAGCAGGAACTTAATTT  
AACCTAATTAATAATTAGATAAATAAATCTTTCATAGACTAAACGTGACAATTTAATATATATA  
TATATTTATTTATATATATGATTAATAAGATATAGTCAATCATCGGTGTGAATCGACTTAAAAAA  
AAAAGCACATGGGTAAACCCATCTCCCCTTATTAGGGGAATCAGAACTTGTTAGTGGGTTTCAT  
GACAGAGCATGCTGCCGTAGTTTTCGTATTCTTCTTTTAGCTGAGTACGGTAGTATTGTACTAAT  
GTGTATTTTAACTAGTATATTATTTATTGGTGGTTACTTATTATTTGAAATATCCTATGTTTTTACTG  
TGGTAAATTATATTTTCTTTGAATTATTCTTTATAGACTGAGTAACATTTGTAGAGGTACAATCTTT  
ATACACTGATTTTTTAAATAATTCTATCATTGAAGGATTATTATATGGGTTTAATCTAGGATTA  
AAGTTCTTTAATGATATTCACATTTATTTGAGCTAGAGCATCCTTCCCTAGAATACGATTTGATCA  
ACTAATGGGCTTCTGTTGAACAGTTTTATTACCTATTAATTTTGCAATTATTATATTAGTACCTTGT  
GTTTTATATAGTTTTAACTTATTACCTGTAAATATACCATTGTTCTAGCTCACACACCCGCCGCC  
CTACTGCCACAAGGCTACAGTACATATGAGGAGGGGAATAAGATCTAGAACTATCCTAGTTA  
ATAATTACACTTAATAGTATACTAAATAGACCATCTATCATACTCGAGAATAGTGATAGTGTAAT  
TATACACTATTTTAACTGTATTCTACACTATTAGCATATTATTATCTTTATATGATAATAATTTTATA  
ACTTAATTTATTAGGTTACATTAACAAAAAATTCGTTAACTTTTTTACCACCTTTTAAATACAAAAT  
ACGAATAATA

>YN541

ATAACAATTCTAAAGAACATAAAGAGTTATTAGATAAAAAATAATTCACCTATACAGTTAATAAAT  
CAACTTAAAGGTATTTTTTCATAAATCCTTTATTAGCTTTAAGTTTAGCTATTACTATTTTCTCTTT  
TGCAGGTATTCCTCCTCTTGTAGGGTTCTTTGCTAAACAGATGGTATTAAGCGCGGCTATTGATC

AAGGTTATATCTTTTTATCTTTAGTTGCAATATTAAGTGTATAGGAGGGGTTTATTATTTAAA  
TATAATTAAGAAATGTTCTTTTATTCACCTGACTATAAATTAACGAAGAAATTAATAATAC  
TATTAATGGTCAAATTATTAATAGAAACAATAAAATATTAATGTTGAATTTAATTATACAAATGT  
AGTTATGTCTAGTTCTGTGGCAATAACTATTTCTACTATTACATTAGTAGTTTTATTATTCATGTTT  
ATGAATAAAGAATGATTAAGTCTGGGTACTATATTGGTACAATCTTTATTTAGCTATTAATGAGTA  
GTATGACATTATTTATAGGGTTTGTATCTGTTATAGCTATTTTATTTTAGCCATTAATTTTATATTT  
GCTCCTCATAATCCTTATCAAGAAAAATATAGTATTTTCGAGTGTGGTTTCCATAGTTTTTTAGGG  
CAAAATAGAACACAATTCGGTATAAAATCTTTATTTTGCTTTAGTTTATTTACTTTTAGATTTAG  
AAATATTATTAACCTTCCCTTCGCTCTTAGTGAGTATGTTAATGGTATTTATGGTCTTTTAGTTAC  
TTTAATTTTTATAGCTATAATAACTATAGGATTTATATTTGAATTAGGTAAGCGCTCTTAAATA  
GACAGCAGACAAAAATTATATACCTAAATTGAACGTTAATTACCATACAGAGTATGTTGGAAT  
AGGTAAGGTTTCTAAGTAAAGTTATAGAGGCAGAAAACCAAAAAACCTACCAAAGGGTAGCTA  
ATGGGAAGCTATTAATAAAAGATGATAACCTATATATAGTATAGTTACTATATATTTACTATA  
ACTAGGATTATTATATATATATATATTATCTTATTGTATATTAAGATTATTATTATAAGGTATA  
ATTAATATAGTATCTTATTGTATAAGAATATAATATATTAACCTATAATTAATTTTATTTTTAATTT  
TTAATTATAATTTTTTTTTATATCTAGATGCTTACACATCTACAGATGTAGAAGAGAACAAAATAT  
TGTTGTTATAGTAGTGGATGATATAGAAAAATATTTTTATATTATTTATTTTGTAGGTAGCTTTT  
GAAGTGTGGATAGAGAGGATATATGGACGGTAGGAGGTATTCATTTAATGAACAGTGGATA  
GTTTAAATTAACCTAGTTATAGTTTATGAATTTAAATTATAATTATATTAATGTAGGTTATGATAGA  
ATTATGTATTGATCCTTAAGAGTTAAGAGAGATACGCCACGTATAATACATATTGGTTTAGGGT  
TGAGTATATATACTTAAGAGTTAAGAATATATATACAATATATAATAAATATAGTAATATATTA  
ATGGTATGGACTTAACCAGGTTTATATATTATCATTTGATAAACATTAATTATAATTTTTCTATTTA  
TTATTATTATACTGTGAGATTAATAATTATTAATAATATTACATAGTACGTGATATTTGG  
GGATTTTATCTTATTAATTGGCAATTAATGATTCTAATCAAATTTTATTCTCTTTAGTTTAAATGGTA  
GAACAATGATCTTCTAATTCATTGGTTTTAGTTGATTCTAAAAAGAGATGAGTAAATAATTTCT  
AGATCAGAAATACTACTTTTAACTACAAAAAGCTTACGCTTTTTAACATTTTTTGATAAATAACA  
ACTATTGTTAATATTTGGCTGTCTATTGGTTTAACTAACAATTACAAAATTTTTCAATTTTTATAAT  
ATAAATTTAAATGAGAATATTAATAAGTCATTATTATTAATAATTAGTGAATCTTACCTTATCGA  
TGCGTCACAACCAAGTAACATTAGTTACTTGTGAAATTTTGGTTCATTATTAGCTGTTTGTTAAT  
AGTACAAATTATTACCGGTATTACATTAGCTATGCATTATAGTCCTAGTGAATGGAAGCTTTTAA  
CTCAATAGAGCATATAATGAGAGATGTTAATAACGGGTGATTAGTTCGTTATCTACATAGTAATA  
CAGCTTCTGCTTCTTTTTCTTAGTGTATTTACACATAGGAAGAGGTATATATTACGGATCATATA  
GAGCTCCTCGTACTTTAGTTGAGCTATTGGTACTGTTATATTAATATTAATGATGGCTATCGGTT  
TCCTAGGTTATGTTTTACCTTATGGACAGATGTCATTATGAGGTGCTACAGTTATTACTAATCTTA  
TTAGTGCTATACCTGAATAGGGCAAGATATTGTTGAATTCATTTGAGGTGGTTTTCTGTTAATA  
ATGCCACTTTAAACAGATTTTTGCATTACATTTGTATTGCCTTTGTATTAGCTGCTTTAGTTTA  
ATGCACTTAATTGCACTTCATGATACTGCTGGTTCAAGCAATCCTCTTGGTGTTCAGGTAATTAC  
GATAGAATTACATTTGCTCCATATTTTTATTTAAAGATTTAATTACTATTTTTATTTATTTTGT  
TTAAGTGCTTTTGTATTCTTTATGCCTAATGTTTTAGGGGATAGTGATAATTATATTATGGCTAATC  
CTATGCAAACCTCCTGCTGCTATTGTACCTGAATGATACTTATTACCTTTCTATGCTATTTTAAGATC  
TATACCTAATAAATTATTAGGTGTTATAGCGATGTTTAGTGCTATTTAGCTATTATGTTATTACCT  
GTTACAGATTTAGGTAGATCTAGAGGTTTACAATTTAGACCATTTAGTAAATAGCTTTCTGAGTT  
TTTGTTGCTAATTTCTTAGTTTAAATGCAATTAGGTGCTAAACACGTTGAAGATCCATTTATATTAT  
TAGGTCAATTAAGTACTGTATTATACTTTAGTTATTTTGTGCTATATTACCTTTAGCTAGTTACTT

AGATAATAGTTTAACTGATTTATCTAATAAATCTGAATTATTTTTAAATAAACTAACTAAATATAT  
TAAGATTATTATTTAATATATTTTCTATTTAAGATACTATTAATTTAGTATTTTGGGTTTTAGTTTA  
TAATTTATATTATATTATGCATTACCTCCACCTTGCTTTGTAGTAAGCTAATCTGTTATTTCTTTA  
GTTTAATGGTAGAACAATGATCTTCTAATTCATTGGTTTTAGTTTGAATCTAAAAAGGAAATAAG  
AAATATATTCTTATTATTACTTATATAATAATTATTTCTTAAAAATATACATTTTGCATTATAGCCGT  
TTAGCTGTATTAAAATGTAAAATGATATAAAATAGAATAAATATTTAAATTATTCCTATGTTATATT  
ATCCTATATTGCAACCATTATCAGAAAGTTGTATTAATACTTGTACCTGCCTTATTAGCTGTAGCTT  
ATGTTACAGTTGCTGAAAGAAAACTATGGCTAGTATGCAAAGAAGATTAGGTCCTAATGCTGT  
AGGTTACTATGGACTATTGCAAGCATTGCTGATGCCTTAAACTTTTTATTTAAAGAATATGTAG  
CTCCTACACAATCTAATATTGTTCTTTTCTTTTAGGTCCTGTAATAACTTTAATTTTTGCATTATTA  
GGTTACGCTGTTATACCCTATGGTCCTGGTTCAGGGATAAGCGACATGAATTTAGGTATATTTTA  
CATGTTAGCTGTGTCATCTTTAGCTACATACGGTATTCTATTAGCTGGTTGAAGTGCGAATAGTA  
AATACGCTTTTCTAGGTTCTCTTAGAAGTACAGCTCAATTAATTAGTTATGAATTAATTAAGTT  
CAGCTATATTAATAGTAATTATGATAACAGGAAATTTAAATTTAACTGTTTGTACTGAATCTCAAA  
GAGCTATTTGATTTATACTACCTTTATTTCTGTGTTTATAATTTTTTCATAGGATCTATAGCTGA  
GACAAATAGAGCTCCTTTTGATTTAGCCGAGGCTAACCTGCTAATCTGGTTTGGTCTGGTTATAT  
GTCACAAATTGCTAGGAAACCTTTTTATTTTAAAAACAAAAGACAATTAGCAGGAAACTTAATTT  
AACCTAATTTAAATATTAGATAATTAACTCTTCATAGACTAAACGTGACAATTTAATATATATA  
TATATTTATTTATATATATGATTAAATAAGATATAGTCAATCATCGGTGTGAATCGACTTAAAAAA  
AAAAGCACATGGGTAAACCCATCTCCCCTTATTAGGGGAATCAGAACTTGTTAGTGGGTTTCAT  
GACAGAGCATGCTGCCGTAGTTTTCGTATTCTTCTTTTGTAGCTGAGTACGGTAGTATTGTACTAAT  
GTGTATTTTAACTAGTATATTATTTATTGGTGGTTACTTATTATTTGAAATATCCTATGTTTTTACTG  
TGGTAAATTATATTTTCTTTGAATTATTCTTTATAGACTGAGTAACATTTGTAGAGGTACAATCTTT  
ATACACTGATTTTTTAAATAATTCTATCATTGAAGGATTATTATATGGGTTTAACTAGGATTAAA  
AAGTTCTTTAATGATATTCACATTTATTTGAGCTAGAGCATCCTTCCCTAGAATACGATTTGATCA  
ACTAATGGGCTTCTGTTGAACAGTTTTATTACCTATTAATTTTGCAATTATTATATTAGTACCTTGT  
GTTTTATATAGTTTTAACTTATTACCTGTAAATATACCATTGTTCTAGCTCACACACCCGCCGCC  
CTACTGCCACAAGGCTACAGTACATATGAGGAGGGGAACTAAAGATCTAGAATATCCTAGTTA  
ATAATTACACTTAATAGTATACTAAATAGACCATCTATCATACTCGAGAATAGTGATAGTGAAT  
TATACACTATTTTAACTGTATTCTACACTATTAGCATATTATTATCTTTATATGATAATAATTTTATA  
ACTTAATTTATTAGGTTACATTAACAAAAAATTCGTTAACTTTTTTCACCACTTTTTAATACAAAAT  
ACGAATTTTA

>YN544

ATAACAATTCTAAAGAACATAAAGAGTTATTAGATAAAAAATAATTCACCTATACAGTTAATAAAT  
CAACTTAAAGGGTATTTTTTCATAAATCCTTTATTAGCTTTAAGTTTAGCTATTACTATTTCTCTTT  
TGCAGGTATTCCTCCTCTTGTAGGGTTCTTTGCTAAACAGATGGTATTAAGCGCGGCTATTGATC  
AAGGTTATATCTTTTTATCTTTAGTTGCAATATTAAGTGTATAGGAGGGGTTTATTATTTAAA  
TATAATTAAGAAATGTTCTTTTATTCACCTGACTATAAATTAAACGAAGAAATTAATAAATAC  
TATTAATGGTCAAATTATTAATAGAAACAATAAAATATTAAATGTTGAATTTAATTATACAAATGT  
AGTTATGTCTAGTTCTGTGGCAATAACTATTTCTACTATTACATTAGTAGTTTTATTATTCATGTTT  
ATGAATAAAGAATGATTAAGTCTGGGTACTATATTGGTACAATCTTTATTTAGCTATTAATGAGTA  
GTATGACATTATTTATAGGGTTTGTATCTGTTATAGCTATTTTATTTTAGCCATTAATTTTATATT  
GCTCCTCATAATCCTTATCAAGAAAAATATAGTATTTTCGAGTGTGGTTTCCATAGTTTTTATAGG  
CAAAATAGAACACAATTCGGTATAAAATCTTTATTTTGTCTTAGTTTATTTACTTTTATAGTTTAG

AAATATTATTAACTTTCCCTTTTCGCTCTTAGTGAGTATGTTAATGGTATTTATGGTCTTTTAGTTAC  
TTTAATTTTTATAGCTATAATAACTATAGGATTTATATTTGAATTAGGTAAAAGCGCTCTTAAAATA  
GACAGCAGACAAAAATTATATATACCTAAATTGAACGTTAATTACCATACAGAGTATGTTGGAAT  
AGGTAAGGTTTCTAAGTAAAGTTATAGAGGCAGAAAACCAAAAAACCTACCAAAGGGTAGCTA  
ATGGGAAGCTATTAATAAATAAAGATGATAACCTATATATAGTATAGTTACTATATATTTACTATA  
ACTAGGATTATTATATATATATATATTATCTTATTGTATATTAAGATTATTATTATAAGGTATA  
ATTAATATAGTATCTTATTGTATAAGAATATAATATATTAACCTATAATTAATTTTATTTTTAATTT  
TTAATTATAATTTTTTTTTATATCTAGATGCTTACACATCTACAGATGTAGAAGAGAACAAAATAT  
TGTTGTTATAGTAGTGGATGATATAGAAAAATTTTTATATTATTTATTTTGTAGGTAGCTTTT  
GAAGTGTTTGATAGAGAGGATATATGGACGGTAGGAGGGTATTCATTTTAATGAACAGTGGAATA  
GTTTAAATTAACCTAGTTATAGTTTATGAATTTAAATTATAATTATATTAATGTAGGTTATGATAGA  
ATTATGTATTGATCCTTAAGAGTTAAGAGAGATACGCCCACGTATAATACATATTGGTTTAGGGT  
TGAGTATATATACTTAAGAGTTAAGAATATATATATACAATATATAATAAATATAGTAATATATTA  
ATGGTATGGACTTAACCAGGTTTATATATTATCATTTGATAAACATTAATTATAATTTTTCTATTTA  
TTATTATTATTATACTGTGAGATTAATAATTATTAATAATATAATATTACATAGTACGTGATATTTGG  
GGATTTTATCTTATTAATTGGCAATTAATGATTCTAATCAAATTTTATTCTCTTTAGTTTAATGGTA  
GAACAATGATCTTCTAATTCATTGGTTTTAGTTTCGATTCTAAAAAGAGATGAGTAAATAATTTTCT  
AGATCAGAAATACTACTTTTAACTACAAAAGCTTACGCTTTTTAACATTTTTTGATAAATAACA  
ACTATTGTTAATATTTGGCTGTCTATTGGTTTAACTAACAATTACAAAATTTTTCAATTTTTATAAT  
ATAAATTTAAATGAGAATATTAATAAAGTCATTCAATTATTAATAATTAGTGAATTCTTACCTTATCGA  
TGCGTCACAACCAAGTAACATTAGTTACTTGTGAAATTTTGGTTCATTATTAGCTGTTTGTTAAT  
AGTACAAATTATTACCGGTATTACATTAGCTATGCATTATAGTCCTAGTGTAATGGAAGCTTTTAA  
CTCAATAGAGCATATAATGAGAGATGTTAATAACGGGTGATTAGTTCGTTATCTACATAGTAATA  
CAGCTTCTGCTTTCTTTTTCTTAGTGATTTACACATAGGAAGAGGTATATATTACGGATCATATA  
GAGCTCCTCGTACTTTAGTTTGAGCTATTGGTACTGTTATATTAATTAATGATGGCTATCGGTT  
TCCTAGGTTATGTTTTACCTTATGGACAGATGTCATTATGAGGTGCTACAGTTATTACTAATCTTA  
TTAGTGCTATACCTGAATAGGGCAAGATATTGTTGAATTCATTTGAGGTGGTTTTCTGTTAATA  
ATGCCACTTTAAACAGATTTTTGCATTACATTTGTATTGCCTTTTGTATTAGCTGCTTTAGTTTTA  
ATGCACTTAATTGCACTTCATGATACTGCTGGTTCAAGCAATCCTCTTGGTGTTTCAGGTAATTAC  
GATAGAATTACATTTGCTCCATATTTTTATTTAAAGATTTAATTACTATTTTTATATTTATTTTGTA  
TTAAGTGCTTTTGATTCTTTATGCCTAATGTTTTAGGGGATAGTGATAATTATATTATGGCTAATC  
CTATGCAAACCTCCTGCTGCTATTGTACCTGAATGATACTTATTACCTTTCTATGCTATTTTAAGATC  
TATACCTAATAAATTATTAGGTGTTATAGCGATGTTTAGTGCTATTTAGCTATTATGTTATTACCT  
GTTACAGATTTAGGTAGATCTAGAGGTTTACAATTTAGACCATTTAGTAAATAGCTTTCTGAGTT  
TTTGTTGCTAATTTCTTAGTTTAAATGCAATTAGGTGCTAAACACGTTGAAGATCCATTTATATTAT  
TAGGTCAATTAAGTACTGTATTATACTTTAGTTATTTTGTGCTATATTACCTTTAGCTAGTTACTT  
AGATAATAGTTTAACTGATTTATCTAATAAATCTGAATTATTTTAAATAAACTAACTAAATATAT  
TAAGATTATTATTTAATATATTTTCTATTTAAGATACTATTAATTTAGTATTTTGGGTTTTAGTTTA  
TAATTTATATTATATTATGCATTACCCTCCACCTTGCTTTGTAGTAAGCTAATCTGTTATTTCTTTA  
GTTTAAATGGTAGAACAAATGATCTTCTAATTCATTGGTTTTAGTTTGAATCTAAAAAGGAAATAAG  
AAATATATTCTTATTATTACTTATATAATAATTATTTCTTAAAAATATACATTTTGCAATTATAGCCGT  
TTAGCTGTATTAAATGTAAATGATATAAAATAGAATAAATATTTAAATTATTCCTATGTTATATT  
ATCCTATATTGCAACCATTATCAGAAGTTGTATTAATACTTGTACCTGCCTTATTAGCTGTAGCTT  
ATGTTACAGTTGCTGAAAGAAAACTATGGCTAGTATGCAAAGAAGATTAGGTCCTAATGCTGT

AGGTTACTATGGACTATTGCAAGCATTGCTGATGCCTTAAACCTTTTATTTAAAGAATATGTAG  
CTCCTACACAATCTAATATTGTTCTTTTCTTTTAGGTCCTGTAATAACTTTAATTTTGCATTATTA  
GGTTACGCTGTTATACCCTATGGTCCTGGTTCAGGGATAAGCGACATGAATTTAGGTATATTTTA  
CATGTTAGCTGTGTCATCTTTAGCTACATACGGTATTCTATTAGCTGGTTGAAGTGCGAATAGTA  
AATACGCTTTTCTAGGTTCTCTTAGAAGTACAGCTCAATTAATTAGTTATGAATTAATATTAAGTT  
CAGCTATATTAATAGTAATTATGATAACAGGAAATTTAAATTTAACTGTTTGTACTGAATCTCAAA  
GAGCTATTTGATTTATACTACCTTTATTTCTGTGTTTATAATATTTTTCATAGGATCTATAGCTGA  
GACAAATAGAGCTCCTTTTGATTTAGCCGAGGCTAACCTGCTAATCTGGTTTGGTCTGGTTATAT  
GTCACAAATTGCTAGGAAACCTTTTTATTTAAAAACAAAAGACAATTAGCAGGAAACTTAATTT  
AACCTAATTAATAATTAGATAATTAACTCTTCATAGACTAAACGTGACAATTTAATATATATA  
TATATTTATTTATATATATGATTAAATAAGATATAGTCAATCATCGGTGTGAATCGACTTAAAAAA  
AAAAGCACATGGGTAAACCCATCTCCCCTTATTAGGGGAATCAGAAGTTGTTAGTGGGTTTCAT  
GACAGAGCATGCTGCCGTAGTTTTCGTATTCTTCTTTTAGCTGAGTACGGTAGTATTGTACTAAT  
GTGTATTTTAACTAGTATATTATTTATTGGTGGTTACTTATTATTTGAAATATCCTATGTTTTACTG  
TGGTAAATTATATTTTCTTTGAATTATTTCTTTATAGACTGAGTAACATTTGTAGAGGTACAATCTTT  
ATACACTGATTTTTTAAATAATTCTATCATTGAAGGATTATTATATGGGTTTAACTAGGATTAAA  
AAGTTCTTTAATGATATTCACATTTATTTGAGCTAGAGCATCCTTCCCTAGAATACGATTTGATCA  
ACTAATGGGCTTCTGTTGAACAGTTTTATTACCTATTAATTTTGCAATTATTATATTAGTACCTTGT  
GTTTTATATAGTTTTAACTTATTACCTGTAAATATACCATTGTTCTAGCTCACACACCCGCCGCC  
CTACTGCCACAAGGCTACAGTACATATGAGGAGGGGAACTAAAGATCTAGAAGTATCCTAGTTA  
ATAATTACACTTAATAGTATACTAAATAGACCATCTATCATACTCGAGAATAGTGATAGTGTAAT  
TATACACTATTTTAACTGTATTCTACACTATTAGCATATTATTATCTTTATATGATAATAATTTTATA  
ACTTAATTTATTAGGTTACATTAACAAAAAATTCGTTAACTTTTTTCACCACTTTTAAATACAAAAT  
ACGAATTTTA

>YN554

ATAACAATTCTAAAGAACATAAAGAGTTATTAGATAAAAAATAATTCACCTATACAGTTAATAAAT  
CAACTTAAAGGGTATTTTTTCATAAATCCTTTATTAGCTTTAAGTTTAGCTATTACTATTTTCTCTTT  
TGCAGGTATTCCTCCTCTGTAGGGTTCTTTGCTAAACAGATGGTATTAAGCGCGGCTATTGATC  
AAGGTTATATCTTTTTATCTTTAGTTGCAATATTAAGTGTATAGGAGGGGTTTATTATTTAAA  
TATAATTAAGAAATGTTCTTTTATTCACCTGACTATAAATTAACGAAGAAATTAATAAATAC  
TATTAATGGTCAAATTATTAATAGAAACAATAAAATATTAATGTTGAATTTAATTATACAAATGT  
AGTTATGTCTAGTTCTGTGGCAATAACTATTTCTACTATTACATTAGTAGTTTTATTATTCATGTTT  
ATGAATAAAGAATGATTAAGTCTGGGTACTATATTGGTACAATCTTTATTTAGCTATTAATGAGTA  
GTATGACATTATTTATAGGGTTTGTATCTGTTATAGCTATTTTATTTTAGCCATTAATTTTATATTT  
GCTCCTCATAATCCTTATCAAGAAAAATATAGTATTTTCGAGTGTGGTTTCCATAGTTTTTTAGGG  
CAAAATAGAACACAATTCGGTATAAAATCTTTATTTTGCTTTAGTTTATTTACTTTTAGATTTAG  
AAATATTATTAACTTTCCCTTCGCTCTTAGTGAGTATGTTAATGGTATTTATGGTCTTTTAGTTAC  
TTTAATTTTTATAGCTATAATAACTATAGGATTTATATTTGAATTAGGTAAAAGCGCTCTTAAATA  
GACAGCAGACAAAAATTATATATACCTAAATTGAACGTTAATTACCATACAGAGTATGTTGGAAT  
AGGTAAGGTTTCTAAGTAAAGTTATAGAGGCAGAAAACCAAAAAACCTACCAAAGGGTAGCTA  
ATGGGAAGCTATTAAAAATAAAGATGATAACCTATATATAGTATAGTTACTATATATTTACTATA  
ACTAGGATTATTATATATATATATATTATCTTATTGTATATTAAGATTATTATTATTATAAGGTATA  
ATTAATATAGTATCTTATTGTATAAGAATATAATATATTAACCTATAATTAATTTTATTTTAAATTT  
TTAATTATAATTTTTTTTTATATCTAGATGCTTACACATCTACAGATGTAGAAGAGAACAAAATAT

TGTTGTTATAGTAGTGGATGATATAGAAAAATATTTTTATATTATTTATTTTTGTTAGGTAGCTTTT  
GAAGTGTGTTGATAGAGAGGATATATGGACGGTAGGAGGGTATTCATTTTAATGAACAGTGGATA  
GTTTAAATTAACCTAGTTATAGTTTATGAATTTAAATTATAATTATATTAATGTAGGTTATGATAGA  
ATTATGTATTGATCCTTAAGAGTTAAGAGAGATACGCCACGTATAATACATATTGGTTTAGGGT  
TGAGTATATATACTTAAGAGTTAAGAATATATATATACAATATATAATAAATATAGTAATATATTA  
ATGGTATGGACTTAACCAGGTTTATATATTATCATTGATAAACATTAATTATAATTTTTCTATTTA  
TTATTATTATTATACTGTGAGATTAATAATTATTTAAATATAATATTACATAGTACGTGATATTTGG  
GGATTTTATCTTATTAATTGGCAATTAATGATTCTAATCAAATTTTATTCTCTTTAGTTTAATGGTA  
GAACAATGATCTTCTAATTCATTGGTTTTAGTTTCGATTCTAAAAAGAGATGAGTAAATAATTTTCT  
AGATCAGAAATACTACTTTTAACTACAAAAAGCTTACGCTTTTAAACATTTTTTTGATAAATAACA  
ACTATTGTTAATATTTGGCTGTCTATTGGTTTAACTACAATTACAAAATTTTTTCAATTTTTATAAT  
ATAAATTTAAATGAGAATATTTAAAAAGTCATTCATTATTTAAATTAGTGAATTCTTACCTTATCGA  
TGCGTCACAACCAAGTAACATTAGTTACTTGTGAAATTTTGGTTCATTATTAGCTGTTTGTTAAT  
AGTACAAATTATTACCGGTATTACATTAGCTATGCATTATAGTCCTAGTGAATGGAAGCTTTTAA  
CTCAATAGAGCATATAATGAGAGATGTTAATAACGGGTGATTAGTTCGTTATCTACATAGTAATA  
CAGCTTCTGCTTTCTTTTCTTAGTGATTACACATAGGAAGAGGTATATATTACGGATCATATA  
GAGCTCCTCGTACTTTAGTTTGAGCTATTGGTACTGTTATATTAATTAATGATGGCTATCGGTT  
TCCTAGGTTATGTTTTACCTTATGGACAGATGTCATTATGAGGTGCTACAGTTATTACTAATCTTA  
TTAGTGCTATACCTGAATAGGGCAAGATATTGTTGAATTCATTTGAGGTGGTTTTTCTGTTAATA  
ATGCCACTTTAAACAGATTTTTTGCAATTACATTTGTATTGCCTTTGTATTAGCTGCTTTAGTTTA  
ATGCACTTAATTGCACTTCATGATACTGCTGGTTCAAGCAATCCTCTGGTGTTTCAGGTAATTAC  
GATAGAATTACATTTGCTCCATATTTTTATTTAAAGATTTAATTACTATTTTTATATTTATTTTGT  
TTAAGTGCTTTGTATTCTTTATGCCTAATGTTTTAGGGGATAGTGATAATTATATTATGGCTAATC  
CTATGCAAACCTCCTGCTGCTATTGTACCTGAATGATACTTATTACCTTTCTATGCTATTTTAAGATC  
TATACCTAATAAATTATTAGGTGTTATAGCGATGTTTAGTGCTATTTAGCTATTATGTTATTACCT  
GTTACAGATTTAGGTAGATCTAGAGGTTTACAATTTAGACCATTTAGTAAATAGCTTTCTGAGTT  
TTTGTTGCTAATTTCTTAGTTTTAATGCAATTAGGTGCTAAACACGTTGAAGATCCATTTATATTAT  
TAGGTCAATTAAGTACTGTATTATACTTTAGTTATTTTGTGCTATATTACCTTTAGCTAGTTACTT  
AGATAATAGTTTAACTGATTTATCTAATAAATCTGAATTATTTTAAATAAACTAACTAAATATAT  
TAAGATTATTATTTAATATATTTTCTATTTAAGATACTATTAATTTAGTATTTTGGGTTTTAGTTTA  
TAATTTATATTATATTATGCATTACCCTCCACCTTGCTTTGTAGTAAGCTAATCTGTTATTTCTTTA  
GTTTAATGGTAGAACAATGATCTTCTAATTCATTGGTTTTAGTTTCGATTCTAAAAAGGAAATAAGA  
AATATATTCTTATTACTTATATAATAATTATTTCTTAAAAATATACATTTTGCATTATAGCCGTT  
TAGCTGTATTTAAATGTAAATGATATAAAATAGAATAAATATTTAAATTATTCCTATGTTATATT  
ATCCTATATTGCAACCATTATCAGAAGTTGTATTAATACTTGTACCTGCCTTATTAGCTGTAGCTT  
ATGTTACAGTTGCTGAAAGAAAACTATGGCTAGTATGCAAAGAAGATTAGGTCCTAATGCTGT  
AGGTTACTATGGACTATTGCAAGCATTTGCTGATGCCTTAAACCTTTTATTTAAAGAATATGTAG  
CTCCTACACAATCTAATATTGTTCTTTTCTTTTAGGTCCTGTAATAACTTTAATTTTTGCATTATTA  
GGTTACGCTGTTATACCCTATGGTCCTGGTTCAGGGATAAGCGACATGAATTTAGGTATATTTTA  
CATGTTAGCTGTGTCATCTTTAGCTACATACGGTATTCTATTAGCTGGTTGAAGTGCGAATAGTA  
AATACGCTTTTCTAGGTTCTCTTAGAAGTACAGCTCAATTAATTAGTTATGAATTAATTAAGTT  
CAGCTATATTAATAGTAATTATGATAACAGGAAATTTAAATTTAACTGTTTGTACTGAATCTCAAA  
GAGCTATTTGATTTATACTACCTTTATTTCTGTGTTTATAATATTTTTCATAGGATCTATAGCTGA  
GACAAATAGAGCTCCTTTTGATTTAGCCGAGGCTAACCTGCTAATCTGGTTTGGTCTGGTTATAT

GTCACAAATTGCTAGGAAACCTTTTTATTTTAAAAACAAAAGACAATTAGCAGGAACTTAATTT  
AACCTAATTAATAATATTAGATAATTAACCTCTTCATAGACTAAACGTGACAATTTAATATATATA  
TATATTTATTTATATATATGATTAAATAAGATATAGTCAATCATCGGTGTGAATCGACTTAAAAAA  
AAAAGCACATGGGTAAACCCATCTCCCCTTATTAGGGGAATCAGAACTTGTTAGTGGGTTTCAT  
GACAGAGCATGCTGCCGTAGTTTTCGTATTCTTCTTTTAGCTGAGTACGGTAGTATTGTACTAAT  
GTGTATTTTAACTAGTATATTATTTATTGGTGGTTACTTATTATTTGAAATATCCTATGTTTTACTG  
TGGTAAATTATATTTTCTTTGAATTATTCTTTATAGACTGAGTAACATTTGTAGAGGTACAATCTTT  
ATACACTGATTTTTTAAATAATTCTATCATTGAAGGATTATTATATGGGTTTAATCTAGGATTAAA  
AAGTTCTTTAATGATATTCACATTTATTTGAGCTAGAGCATCCTTCCCTAGAATACGATTTGATCA  
ACTAATGGGCTTCTGTTGAACAGTTTTATTACCTATTAATTTTGCAATTATTATATTAGTACCTTGT  
GTTTTATATAGTTTTAACTTATTACCTGTAAATATACCATTGTTCTAGCTCACACACCCGCCGCC  
CTACTGCCACAAGGCTACAGTACATATGAGGAGGGGAACCTAAAGATCTAGAACTATCCTAGTTA  
ATAATTACACTTAATAGTATACTAAATAGACCATCTATCATACTCGAGAATAGTGATAGTGTAAT  
TATACACTATTTTAACTGTATTCTACACTATTAGCATATTATTATCTTTATATGATAATAATTTTATA  
ACTTAATTTATTAGGTTACATTAACAAAAAATTCGTTAACTTTTTTCACCACTTTTTAATACAAAAT  
ACGAATTTTA

>YN557

ATAACAATTCTAAAGAACATAAAGAGTTATTAGATAAAAAATAATTCACCTATACAGTTAATAAAT  
CAACTTAAAGGGTATTTTTTCATAAATCCTTTATTAGCTTTAAGTTAGCTATTACTATTTTCTCTTT  
TGCAGGTATTCCTCCTCTTGTAGGGTCTTTGCTAAACAGATGGTATTAAGCGCGGCTATTGATC  
AAGGTTATATCTTTTTATCTTTAGTTGCAATATTAAGTGTATAGGAGGGGTTTATTATTTAAA  
TATAATTAAGAAATGTTCTTTTATTCACCTGACTATAAATTAACGAAGAAATTAATAAATAC  
TATTAATGGTCAAATTATTAATAGAAACAATAAAATATTAATGTTGAATTTAATTATACAAATGT  
AGTTATGTCTAGTTCTGTGGCAATAACTATTTCTACTATTACATTAGTAGTTTTATTATTCATGTTT  
ATGAATAAAGAATGATTAAGTCTGGGTACTATATTGGTACAATCTTTATTTAGCTATTAATGAGTA  
GTATGACATTATTTATAGGGTTTGTATCTGTTATAGCTATTTTATTTTAGCCATTAATTTTATATTT  
GCTCCTCATAATCCTTATCAAGAAAAATATAGTATTTTCGAGTGTGGTTTCCATAGTTTTTTAGGG  
CAAAATAGAACACAATTCGGTATAAAATCTTTATTTTGCTTTAGTTTATTTACTTTTAGATTTAG  
AAATATTATTAACCTTTCCCTTTTCGCTCTTAGTGAGTATGTTAATGGTATTTATGGTCTTTTAGTTAC  
TTTAATTTTTATAGCTATAATAACTATAGGATTTATATTTGAATTAGGTAAAAGCGCTCTTAAATA  
GACAGCAGACAAAAATTATATACCTAAATTGAACGTTAATTACCATACAGAGTATGTTGGAAT  
AGGTAAGGTTTCTAAGTAAAGTTATAGAGGCAGAAAACCAAAAAACCTACCAAAGGGTAGCTA  
ATGGGAAGCTATTAATAAAGATGATAACCTATATATAGTATAGTTACTATATATTTACTATA  
ACTAGGATTATTATATATATATATATTATCTTATTGTATATTAAGATTATTATTATAAGGTATA  
ATTAATATAGTATCTTATTGTATAAGAATATAATATATTAACCTATAATTAATTTATTTTTAATTT  
TTAATTATAATTTTTTTTTATATCTAGATGCTTACACATCTACAGATGTAGAAGAGAACAAAATAT  
TGTTGTTATAGTAGTGATATAGAAAAATATTTTATATTATTTATTTTGTAGGTAGCTTTT  
GAAGTGTGATAGAGAGGATATATGGACGGTAGGAGGTATTCATTTAATGAACAGTGGATA  
GTTTAAATTAACCTAGTTATAGTTTATGAATTTAAATTATAATTATATTAATGTAGGTATGATAGA  
ATTATGTATTGATCCTTAAGAGTTAAGAGAGATACGCCACGTATAATACATATTGGTTAGGGT  
TGAGTATATATACTTAAGAGTTAAGAATATATATATACAATATATAATAAATATAGTAATATATTA  
ATGGTATGGACTTAACCAGGTTTATATATTATCATTTGATAAACATTAATTATAATTTTTCTATTTA  
TTATTATTATACTGTGAGATTAATAATTATTAATAATATTACATAGTACGTGATATTTGG  
GGATTTTATCTTATTAATTGGCAATTAATGATTCTAATCAAATTTTATTCTCTTAGTTAATGGTA

GAACAATGATCTTCTAATTCATTGGTTTTAGTTTCGATTCTAAAAAGAGATGAGTAAATAATTTTCT  
AGATCAGAAATACTACTTTTAACTACAAAAAGCTTACGCTTTTAAACATTTTTTGATAAATAACA  
ACTATTGTTAATATTTGGCTGTCTATTGGTTTAACTAACAATTACAAAATTTTTCAATTTTTATAAT  
ATAAATTTAAATGAGAATATTAATAAGTCATTATTATTAATAATTAGTGAATTCTTACCTTATCGA  
TGCGTCACAACCAAGTAACATTAGTTACTTGTGAAATTTTGGTTCATTATTAGCTGTTTGTTAAT  
AGTACAAATTATTACCGGTATTACATTAGCTATGCATTATAGTCCTAGTGAATGGAAGCTTTTAA  
CTCAATAGAGCATATAATGAGAGATGTTAATAACGGGTGATTAGTTCGTTATCTACATAGTAATA  
CAGCTTCTGCTTTCTTTTTCTTAGTGATTTACACATAGGAAGAGGTATATATTACGGATCATATA  
GAGCTCCTCGTACTTTAGTTTGAGCTATTGGTACTGTTATATTAATTAATGATGGCTATCGGT  
TCCTAGGTTATGTTTTACCTTATGGACAGATGTCATTATGAGGTGCTACAGTTATTACTAATCTTA  
TTAGTGCTATACCTGAATAGGGCAAGATATTGTTGAATTCATTTGAGGTGGTTTTCTGTTAATA  
ATGCCACTTTAAACAGATTTTTGCATTACATTTGTATTGCCTTTGTATTAGCTGCTTTAGTTTAA  
ATGCACTTAATTGCACTTCATGATACTGCTGGTTCAAGCAATCCTCTGGTGTTTCAGGTAATTAC  
GATAGAATTACATTTGCTCCATATTTTTATTTAAAGATTTAATTACTATTTTTATTTATTTTTGTA  
TTAAGTGCTTTTGATTCTTTATGCCTAATGTTTTAGGGGATAGTGATAATTATATTATGGCTAATC  
CTATGCAAACTCCTGCTGCTATTGTACCTGAATGATACTTATTACCTTTCTATGCTATTTTAAGATC  
TATACCTAATAAATTATTAGGTGTTATAGCGATGTTTAGTGCTATTTTAGCTATTATGTTATTACCT  
GTTACAGATTTAGGTAGATCTAGAGGTTTACAATTTAGACCATTTAGTAAAATAGCTTTCTGAGTT  
TTTGTTGCTAATTTCTTAGTTTTAATGCAATTAGGTGCTAAACACGTTGAAGATCCATTTATATTAT  
TAGGTCAATTAAGTACTGTATTATACTTTAGTTATTTTTGTTGCTATATTACCTTTAGCTAGTTACTT  
AGATAATAGTTTAACTGATTTATCTAATAAATCTGAATTATTTTAAATAAACTAACTAAATATAT  
TAAGATTATTATTTAATATATTTTCTATTTAAGATACTATTAATTTAGTATTTTGGGTTTTAGTTTA  
TAATTTATATTATATTATGCATTACCTCCACCTTGCTTTGTAGTAAGCTAATCTGTTATTTCTTTA  
GTTTAATGGTAGAACAATGATCTTCTAATTCATTGGTTTTAGTTTGAATCTAAAAAGGAAATAAG  
AAATATATTCTTATTATTACTTATATAATAATTATTTCTTAAAAATATACATTTTGCATTATAGCCGT  
TTAGCTGTATTAAATGTAAATGATATAAAATAGAATAAATATTTAAATTATTCCTATGTTATATT  
ATCCTATATTGCAACCATTATCAGAAGTTGTATTAATACTTGTACCTGCCTTATTAGCTGTAGCTT  
ATGTTACAGTTGCTGAAAGAAAACTATGGCTAGTATGCAAAGAAGATTAGGTCCTAATGCTGT  
AGGTTACTATGGACTATTGCAAGCATTGCTGATGCCTTAAACTTTTATTAAGAATATGTAG  
CTCCTACACAATCTAATATTGTTCTTTCTTTTAGGTCCTGTAATAACTTTAATTTTTGCATTATTA  
GGTTACGCTGTTATACCCTATGGTCCTGGTTCAGGGATAAGCGACATGAATTTAGGTATATTTTA  
CATGTTAGCTGTGTCATCTTTAGCTACATACGGTATTCTATTAGCTGGTTGAAGTGCGAATAGTA  
AATACGCTTTTCTAGGTTCTTTAGAAGTACAGCTCAATTAATTAGTTATGAATTAATTAAGTT  
CAGCTATATTAATAGTAATTATGATAACAGGAAATTTAAATTTAACTGTTTGTACTGAATCTCAAA  
GAGCTATTTGATTTATACTACCTTTATTTCTGTGTTATAATATTTTTCATAGGATCTATAGCTGA  
GACAAATAGAGCTCCTTTTGATTTAGCCGAGGCTAACCTGCTAATCTGGTTTGGTCTGGTTATAT  
GTCACAAATTGCTAGGAAACCTTTTTATTTAAAAACAAAAGACAATTAGCAGGAAACTTAATTT  
AACCTAATTAATAATTAGATAATTAACCTCTTCATAGACTAAACGTGACAATTTAATATATATA  
TATATTTATTTATATATATGATTAAATAAGATATAGTCAATCATCGGTGTGAATCGACTTAAAAAA  
AAAAGCACATGGGTAAACCCATCTCCCCTATTAGGGGAATCAGAACTTGTTAGTGGGTTTCAT  
GACAGAGCATGCTGCCGTAGTTTTCGTATTCTTCTTTTAGCTGAGTACGGTAGTATTGTACTAAT  
GTGTATTTTAACTAGTATATTATTTATTGGTGGTTACTTATTATTTGAAATATCCTATGTTTTACTG  
TGGTAAATTATATTTCTTTGAATTATTCTTTATAGACTGAGTAACATTTGTAGAGGTACAATCTTT  
ATACACTGATTTTTTAAATAATTCTATCATTGAAGGATTATTATATGGGTTAATCTAGGATTAAA

AAGTTCTTTAATGATATTCACATTTATTTGAGCTAGAGCATCCTTCCCTAGAATACGATTTGATCA  
ACTAATGGGCTTCTGTTGAACAGTTTTATTACCTATTAATTTTGCAATTATTATATTAGTACCTTGT  
GTTTTATATAGTTTTAACTTATTACCTGTAAATATACCATTGTTCTAGCTCACACACCCGCCGCC  
CTACTGCCACAAGGCTACAGTACATATGAGGAGGGGAAGTAAAGATCTAGAACTATCCTAGTTA  
ATAATTACACTTAATAGTATACTAAATAGACCATCTATCATACTCGAGAATAGTGATAGTGTAAT  
TATACACTATTTTAACTGTATTCTACACTATTAGCATATTATTATCTTTATATGATAATAATTTTATA  
ACTTAATTTATTAGGTTACATTAACAAAAAATTCGTTAACTTTTTTCACCACTTTTAAATACAAAAT  
ACGAATTTTA

>YN561

ATAACAATTCTAAAGAACATAAAGAGTTATTAGATAAAAAATAATTCACCTATACAGTTAATAAAT  
CAACTTAAAGGGTATTTTTTCATAAATCCTTTATTAGCTTTAAGTTTAGCTATTACTATTTCTCTTT  
TGCAGGTATTCTCCTCTTGTAGGGTCTTTGCTAAACAGATGGTATTAAGCGCGGCTATTGATC  
AAGGTTATATCTTTTTATCTTTAGTTGCAATATTAAGTGTATAGGAGGGGTTTATTATTTAAA  
TATAATTAAGAAATGTTCTTTTATTCACCTGACTATAAATTAACGAAGAAATTAATAAATAC  
TATTAATGGTCAAATTATTAATAGAAACAATAAATATTAATGTTGAATTTAATTATACAAATGT  
AGTTATGTCTAGTTCTGTGGCAATAACTATTTCTACTATTACATTAGTAGTTTTATTATTCATGTTT  
ATGAATAAAGAATGATTAAGTCTGGGTACTATATTGGTACAATCTTTATTTAGCTATTAATGAGTA  
GTATGACATTATTTATAGGGTTGTATCTGTTATAGCTATTTTATTTTAGCCATTAATTTTATATTT  
GCTCCTCATAATCCTTATCAAGAAAAATATAGTATTTTCGAGTGTGGTTTCCATAGTTTTTTAGGG  
CAAAATAGAACACAATTCGGTATAAAATTCCTTTATTTTGTCTTAGTTTATTTACTTTTAGATTTAG  
AAATATTATTAACTTTCCCTTCGCTCTTAGTGAGTATGTTAATGGTATTTATGGTCTTTTAGTTAC  
TTTAATTTTTATAGCTATAATAACTATAGGATTTATATTTGAATTAGGTAAGCGCTCTTAAATA  
GACAGCAGACAAAAATTATATATACCTAAATTGAACGTTAATTACCATACAGAGTATGTTGGAAT  
AGGTAAGGTTTCTAAGTAAAGTTATAGAGGCAGAAAACCAAAAAACCTACCAAAGGGTAGCTA  
ATGGGAAGCTATTAATAAATAAAGATGATAACCTATATATAGTATAGTTACTATATATTTACTATA  
ACTAGGATTATTATATATATATATATTATCTTATTGTATATTAAGATTATTATTATAAGGTATA  
ATTAATATAGTATCTTATTGTATAAGAATATAATATATTAACCTATAATTAATTTTATTTTTTAATTT  
TTAATTATAATTTTTTTTTATATCTAGATGCTTACACATCTACAGATGTAGAAGAGAACAAAATAT  
TGTTGTTATAGTAGTGGATGATATAGAAAAATATTTTTATATTATTTATTTTGTAGGTAGCTTTT  
GAAGTGTGTTGATAGAGAGGATATATGGACGGTAGGAGGGTATTCATTTAATGAACAGTGGATA  
GTTTAAATTAACCTAGTTATAGTTTATGAATTTAAATTATAATTATATTAATGTAGGTTATGATAGA  
ATTATGTATTGATCCTTAAGAGTTAAGAGAGATACGCCACGTATAATACATATTGGTTTAGGGT  
TGAGTATATATACTTAAGAGTTAAGAATATATATATACAATATATAATAAATATAGTAATATATTA  
ATGGTATGGACTTAACCAGGTTTATATATTATCATTTGATAAACATTAATTATAATTTTTCTATTTA  
TTATTATTATTATACTGTGAGATTAATAATTATTAATAATATAATATTACATAGTACGTGATATTTGG  
GGATTTTATCTTATTAATTGGCAATTAATGATTCTAATCAAATTTTATTCTCTTAGTTAATGGTA  
GAACAATGATCTTCTAATTCATTGGTTTTAGTTTCGATTCTAAAAAGAGATGAGTAAATAATTTTCT  
AGATCAGAAATACTACTTTTAACTACAAAAAGCTTACGCTTTTAAACATTTTTTTGATAAATAACA  
ACTATTGTTAATATTTGGCTGTCTATTGGTTTAACTAACAATTACAAAATTTTTCAATTTTTATAAT  
ATAAATTTAAATGAGAATATTAATAAAGTCATTCATTATTAATAAATTAGTGAATCTTACCTTATCGA  
TGCGTCACAACCAAGTAACATTAGTTACTTGTGAAATTTTGGTTCATTATTAGCTGTTTGTAAAT  
AGTACAAATTATTACCGGTATTACATTAGCTATGCATTATAGTCCTAGTGTAATGGAAGCTTTTAA  
CTCAATAGAGCATATAATGAGAGATGTTAATAACGGGTGATTAGTTCGTTATCTACATAGTAATA  
CAGCTTCTGCTTTCTTTTCTTAGTGATTACACATAGGAAGAGGTATATATTACGGATCATATA

GAGCTCCTCGTACTTTAGTTTGAGCTATTGGTACTGTTATATTAATATTAATGATGGCTATCGGTT  
TCCTAGGTTATGTTTTACCTTATGGACAGATGTCATTATGAGGTGCTACAGTTATTACTAATCTTA  
TTAGTGCTATACCTGAATAGGGCAAGATATTGTTGAATTCATTTGAGGTGGTTTTCTGTAAATA  
ATGCCACTTTAAACAGATTTTTGCATTACATTTGTATTGCCTTTGTATTAGCTGCTTTAGTTTTA  
ATGCACTTAATTGCACTTCATGATACTGCTGGTTCAAGCAATCCTCTTGGTGTTCAGGTAATTAC  
GATAGAATTACATTTGCTCCATATTTTTATTTAAAGATTTAATTACTATTTTTATTTATTTTTGTA  
TTAAGTGCTTTTGTATTCTTTATGCCTAATGTTTTAGGGGATAGTGATAATTATATTATGGCTAATC  
CTATGCCAACTCCTGCTGCTATTGTACCTGAATGATACTTATTACCTTTCTATGCTATTTAAGATC  
TATACCTAATAAATTATTAGGTGTTATAGCGATGTTTAGTGCTATTTTAGCTATTATGTTATTACCT  
GTTACAGATTTAGGTAGATCTAGAGGTTTACAATTTAGACCATTTAGTAAAATAGCTTTCTGAGTT  
TTTGTTGCTAATTTCTTAGTTTTAATGCAATTAGGTGCTAAACACGTTGAAGATCCATTTATATTAT  
TAGGTCAATTAAGTACTGTATTATACTTTAGTTATTTTGTGCTATATTACCTTTAGCTAGTTACTT  
AGATAATAGTTTAACTGATTTATCTAATAAATCTGAATTATTTTAAATAAAACTAACTAAATATAT  
TAAGATTATTATTTAATATATTTTCTATTTAAGATACTATTAATTTAGTATTTTGGGTTTTCAGTTTA  
TAATTTATATTATATTATGCATTACCCTCCACCTTGCTTTGTAGTAAGCTAATCTGTTATTTCTTTA  
GTTAATGGTAGAACAATGATCTTCTAATTCATTGGTTTTAGTTCGAATCTAAAAAGGAAATAAG  
AAATATATTCTTATTATTACTTATATAATAATTATTTCTTAAAAATATACATTTTGCATTATAGCCGT  
TTAGCTGTATTAATAATGTAAATGATATAAAATAGAATAAATATTTAAATTATTCCTATGTTATATT  
ATCCTATATTGCAACCATTATCAGAAGTTGTATTAATACTTGTACCTGCCTTATTAGCTGTAGCTT  
ATGTTACAGTTGCTGAAAGAAAAACTATGGCTAGTATGCAAAGAAGATTAGGTCCTAATGCTGT  
AGGTTACTATGGACTATTGCAAGCATTTGCTGATGCCTTAAACTTTTTATTAAGAATATGTAG  
CTCCTACACAATCTAATATTGTTCTTTTCTTTTAGGTCCTGTAATAACTTTAATTTTGCATTATTA  
GGTTACGCTGTTATACCCTATGGTCCTGGTTCAGGGATAAGCGACATGAATTTAGGTATATTTA  
CATGTTAGCTGTGTCATCTTTAGCTACATACGGTATTCTATTAGCTGGTTGAAGTGCGAATAGTA  
AATACGCTTTTCTAGGTTCTCTTAGAAGTACAGCTCAATTAATTAGTTATGAATTAATATTAAGTT  
CAGCTATATTAATAGTAATTATGATAACAGGAAATTTAAATTTAACTGTTTGTACTGAATCTCAAA  
GAGCTATTTGATTTATACTACCTTTATTTCTGTGTTTATAATTTTTTCATAGGATCTATAGCTGA  
GACAAATAGAGCTCCTTTTGATTTAGCCGAGGCTAACCTGCTAATCTGGTTTGGTCTGGTTATAT  
GTCACAAATTGCTAGGAAACCTTTTTATTTAAAAACAAAAGACAATTAGCAGGAACTTAATTT  
AACCTAATTAATAATATTAGATAATTAACTCTTCATAGACTAAACGTGACAATTTAATATATATA  
TATATTTATTTATATATATGATTAATAAGATATAGTCAATCATCGGTGTGAATCGACTTAAAAAA  
AAAAGCACATGGGTAAACCCATCTCCCCTTATTAGGGGAATCAGAACTTGTTAGTGGGTTTCAT  
GACAGAGCATGCTGCCGTAGTTTTCGTATTCTTCTTTTAGCTGAGTACGGTAGTATTGTACTAAT  
GTGTATTTTAACTAGTATATTATTTATTGGTGGTTACTTATTATTTGAAATATCCTATGTTTTACTG  
TGGTAAATTATTTTTCTTTGAATTATTCTTTATAGACTGAGTAACATTTGTAGAGGTACAATCTTT  
ATACACTGATTTTTTAAATAATTCTATCATTGAAGGATTATTATATGGGTTTAACTAGGATTA  
AAGTTCTTTAATGATATTCACATTTATTTGAGCTAGAGCATCCTTCCCTAGAATACGATTTGATCA  
ACTAATGGGCTTCTGTTGAACAGTTTTATTACCTATTAATTTTGCAATTATTATATTAGTACCTTGT  
GTTTTATATAGTTTTAACTTATTACCTGTAAATATACCATTGTTCTAGCTCACACACCCGCCGCC  
CTACTGCCACAAGGCTACAGTACATATGAGGAGGGGAACTAAAGATCTAGAACTATCCTAGTTA  
ATAATTACACTTAATAGTATACTAAATAGACCATCTATCATACTCGAGAATAGTGATAGTGTAAT  
TATACACTATTTTAACTGTATTCTACACTATTAGCATATTATTATCTTTATATGATAATAATTTTATA  
ACTTAATTTATTAGGTTACATTAACAAAAAATTCGTTAACTTTTTTCACCACTTTTAAATACAAAAT  
ACGAATTATA

>YN567

ATAACAATTCTAAAGAACATAAAGAGTTATTAGATAAAAAATAATTCACCTATACAGTTAATAAAT  
CAACTTAAAGGGTATTTTTTCATAAATCCTTTATTAGCTTTAAGTTTAGCTATTACTATTTCTCTTT  
TGCAGGTATTCCTCCTCTTGAGGGTCTTTGCTAAACAGATGGTATTAAGCGCGGCTATTGATC  
AAGGTTATATCTTTTTATCTTTAGTTGCAATATTAAGTGTATAGGAGGGGTTTATTATTTAAA  
TATAATTAAGAAATGTTCTTTTATTCACCTGACTATAAATTAACGAAGAAATTAATAAATAC  
TATTAATGGTCAAATTATTAATAGAAACAATAAAATATTAAATGTTGAATTAATTATACAAATGT  
AGTTATGTCTAGTTCTGTGGCAATAACTATTTCTACTATTACATTAGTAGTTTTATTATTCATGTTT  
ATGAATAAAGAATGATTAAGTCTGGGTACTATATTGGTACAATCTTTATTTAGCTATTAATGAGTA  
GTATGACATTATTTATAGGGTTTGTATCTGTTATAGCTATTTTATTTTAGCCATTAATTTATATTT  
GCTCCTCATAATCCTTATCAAGAAAAATATAGTATTTTCGAGTGTGGTTTCCATAGTTTTTATAGG  
CAAAATAGAACACAATTCGGTATAAAATCTTTATTTTGTCTTAGTTTATTTACTTTTAGATTTAG  
AAATATTATTAACTTTCCCTTTTCGCTCTTAGTGAGTATGTTAATGGTATTTATGGTCTTTTAGTTAC  
TTTAATTTTATAGCTATAATAACTATAGGATTTATATTTGAATTAGGTAAAAGCGCTCTTAAATA  
GACAGCAGACAAAAATTATATATACCTAAATTGAACGTTAATTACCATACAGAGTATGTTGGAAT  
AGGTAAGGTTTCTAAGTAAAGTTATAGAGGCAGAAAACCAAAAACCTACCAAAGGGTAGCTA  
ATGGGAAGCTATTAATAAAGATGATAACCTATATATAGTATAGTTACTATATATTTACTATA  
ACTAGGATTATTATATATATATATATTATCTTATTGTATATTAAGATTATTATTATTAAGGTATA  
ATTAATATAGTATCTTATTGTATAAGAATATAATATATTAACCTATAATTAATTTATTTTAAATTT  
TTAATTATAATTTTTTTTATATCTAGATGCTTACACATCTACAGATGTAGAAGAGAACAAAATAT  
TGTTGTTATAGTAGTGATATAGAAAAATATTTTATATTATTTATTTTGTAGGTAGCTTTT  
GAAGTGTTTGATAGAGAGGATATATGGACGGTAGGAGGGTATTCATTTTAAATGAACAGTGGATA  
GTTTAAATTAACCTAGTTATAGTTTATGAATTTAAATTATAATTATATTAATGTAGGTATGATAGA  
ATTATGTATTGATCCTTAAGAGTTAAGAGAGATACGCCACGTATAATACATATTGGTTTAGGGT  
TGAGTATATATACTTAAGAGTTAAGAATATATATATACAATATATAATAAATATAGTAATATATTA  
ATGGTATGGACTTAACCAGGTTTATATTATCATTGATAAACATTAATTATAATTTTCTATTTA  
TTATTATTATTATACTGTGAGATTAATAATTATTAATAATATTACATAGTACGTGATATTTGG  
GGATTTTATCTTATTAATTGGCAATTAATGATTCTAATCAAATTTTATTCTCTTAGTTTAAATGGTA  
GAACAATGATCTTCTAATTCATTGGTTTTAGTTTCGATTCTAAAAAGAGATGAGTAAATAATTTTCT  
AGATCAGAAATACTACTTTTAACTACAAAAGCTTACGCTTTTAAACATTTTTTGTAAATAACA  
ACTATTGTTAATATTTGGCTGTCTATTGGTTTAACTACAATTACAAAATTTTTCAATTTTATAAT  
ATAAATTTAAATGAGAATATTAATAAAGTCATTCAATTATTAATAAATTAGTGAATTCTACCTTATCGA  
TGCCTCACAACCAAGTAACATTAGTTACTTGTGAAATTTTGGTTCATTATTAGCTGTTTGTAAAT  
AGTACAAATTATTACCGGTATTACATTAGCTATGCATTATAGTCCTAGTGAATGGAAGCTTTTAA  
CTCAATAGAGCATATAATGAGAGATGTTAATAACGGGTGATTAGTTCGTTATCTACATAGTAATA  
CAGCTTCTGCTTTCTTTTCTTAGTGATTTACACATAGGAAGAGGTATATATTACGGATCATATA  
GAGCTCCTCGTACTTTAGTTTGAGCTATTGGTACTGTTATATTAATTAATGATGGCTATCGGTT  
TCCTAGGTTATGTTTTACCTTATGGACAGATGTCATTATGAGGTGCTACAGTTATTACTAATCTTA  
TTAGTGCTATACCTGAATAGGGCAAGATATTGTTGAATTCATTTGAGGTGGTTTTCTGTAAATA  
ATGCCACTTTAAACAGATTTTTTGCAATTACATTTGTATTGCCTTTGTATTAGCTGCTTAGTTTA  
ATGCACTTAATTGCACTTCATGATACTGCTGGTTCAAGCAATCCTCTTGGTGTTTCAGGTAATTAC  
GATAGAATTACATTTGCTCCATATTTTTATTTAAAGATTTAATTACTATTTTTATATTTATTTTGT  
TTAAGTGCTTTGTATTCTTTATGCCTAATGTTTTAGGGGATAGTGATAATTATATTATGGCTAATC  
CTATGCAAACCTCCTGCTGCTATTGTACCTGAATGATACTTATTACCTTTCTATGCTATTTTAAGATC

TATACCTAATAAATTATTAGGTGTTATAGCGATGTTTAGTGCTATTTTAGCTATTATGTTATTACCT  
GTTACAGATTTAGGTAGATCTAGAGGTTTACAATTTAGACCATTTAGTAAAATAGCTTTCTGAGTT  
TTTGTTGCTAATTTCTTAGTTTTAATGCAATTAGGTGCTAAACACGTTGAAGATCCATTATATTAT  
TAGGTCAATTAAGTACTGTATTATACTTTAGTTATTTTGTGCTATATTACCTTTAGCTAGTTACTT  
AGATAATAGTTTAACTGATTTATCTAATAAATCTGAATTATTTTAAATAAACTAACTAAATATAT  
TAAGATTATTATTTAATATATTTTCTATTTAAGATACTATTAATTTAGTATTTTGGGTTTTAGTTTA  
TAATTTATATTATATTATGCATTACCCTCCACCTTGCTTTGTAGTAAGCTAATCTGTTATTTCTTTA  
GTTTAATGGTAGAACAATGATCTTCTAATTCATTGGTTTTAGTTCGAATCTAAAAAGGAAATAAG  
AAATATATTCTTATTATTACTTATATAATAATTATTTCTTAAAAATATACATTTTGCATTATAGCCGT  
TTAGCTGTATTAAATGTAAATGATATAAAATAGAATAAATATTTAAATTATTCCTATGTTATATT  
ATCCTATATTGCAACCATTATCAGAAGTTGTATTAATACTTGTACCTGCCTTATTAGCTGTAGCTT  
ATGTTACAGTTGCTGAAAGAAAACTATGGCTAGTATGCAAAGAAGATTAGGTCCTAATGCTGT  
AGGTTACTATGGACTATTGCAAGCATTTGCTGATGCCTTAAACTTTTTATTAAAGAATATGTAG  
CTCCTACACAATCTAATATTGTTCTTTTCTTTTAGGTCCTGTAATAACTTTAATTTTTGCATTATTA  
GGTTACGCTGTTATACCCTATGGTCCTGGTTCAGGGATAAGCGACATGAATTTAGGTATATTTTA  
CATGTTAGCTGTGTCATCTTTAGCTACATACGGTATTCTATTAGCTGGTTGAAGTGCGAATAGTA  
AATACGCTTTTCTAGGTTCTCTTAGAAGTACAGCTCAATTAATTAGTTATGAATTAATATTAAGTT  
CAGCTATATTAATAGTAATTATGATAACAGGAAATTTAAATTTAACTGTTTGTACTGAATCTCAAA  
GAGCTATTTGATTTATACTACCTTTATTTCTGTGTTTATAATATTTTTCATAGGATCTATAGCTGA  
GACAAATAGAGCTCCTTTTGATTTAGCCGAGGCTAACCTGCTAATCTGGTTTGGTCTGGTTATAT  
GTCACAAATTGCTAGGAAACCTTTTTATTTTAAAAACAAAAGACAATTAGCAGGAACTTAATTT  
AACCTAATTAATAATATTAGATAATTAACTCTTCATAGACTAAACGTGACAATTTAATATATATA  
TATATTTATTTATATATATGATTAATAAGATATAGTCAATCATCGGTGTGAATCGACTTAAAAAA  
AAAAGCACATGGGTAAACCCATCTCCCCTTATTAGGGGAATCAGAACTTGTTAGTGGGTTTCAT  
GACAGAGCATGCTGCCGTAGTTTTCGTATTCTTCTTTTAGCTGAGTACGGTAGTATTGTACTAAT  
GTGTATTTTAACTAGTATATTATTTATTGGTGGTTACTTATTATTTGAAATATCCTATGTTTTACTG  
TGGTAAATTATATTTTCTTTGAATTATTCTTTATAGACTGAGTAACATTTGTAGAGGTACAATCTTT  
ATACACTGATTTTTTAAATAATTCTATCATTGAAGGATTATTATATGGGTTTAACTAGGATTAAA  
AAGTTCTTTAATGATATTCACATTTATTTGAGCTAGAGCATCCTTCCCTAGAATACGATTTGATCA  
ACTAATGGGCTTCTGTTGAACAGTTTTATTACCTATTAATTTTGCAATTATTATATTAGTACCTTGT  
GTTTTATATAGTTTTAACTTATTACCTGTAAATATACCATTGTTCTAGCTCACACACCCGCCGCC  
CTACTGCCACAAGGCTACAGTACATATGAGGAGGGGAACTAAAGATCTAGAACTATCCTAGTTA  
ATAATTACACTTAATAGTATACTAAATAGACCATCTATCATACTCGAGAATAGTGATAGTGTAAT  
TATACACTATTTTAACTGTATTCTACACTATTAGCATATTATTATCTTTATATGATAATAATTTTATA  
ACTTAATTTATTAGGTTACATTAACAAAAAATTCGTTAACTTTTTTCACCACTTTTAAATACAAAAAT  
ACGAATTTTA

>YN604

ATAACAATTCTAAAGAACATAAAGAGTTATTAGATAAAAAATAATTCACCTATACAGTTAATAAAT  
CAACTTAAAGGGTATTTTTTCATAAATCCTTTATTAGCTTTAAGTTTAGCTATTACTATTTTCTCTTT  
TGCAGGTATTCCTCCTCTGTAGGGTTCTTTGCTAAACAGATGGTATTAAGCGCGGCTATTGATC  
AAGGTTATATCTTTTATCTTTAGTTGCAATATTAAGTGTATAGGAGGGGTTTATTATTTAAA  
TATAATTAAGAAATGTTCTTTTATTCACCTGACTATAAATTAACGAAGAAATTAATAAATAATAC  
TATTAATGGTCAAATTATTAATAGAAACAATAAAATATTAATGTTGAATTTAATTATACAAATGT  
AGTTATGTCTAGTTCTGTGGCAATAACTATTTCTACTATTACATTAGTAGTTTTATTATTCATGTTT

ATGAATAAAGAATGATTAAGTCTGGGTACTATATTGGTACAATCTTTATTTAGCTATTAATGAGTA  
GTATGACATTATTTATAGGGTTTGTATCTGTTATAGCTATTTTATTTTATAGCCATTAATTTTATATTT  
GCTCCTCATAATCCTTATCAAGAAAAATATAGTATTTTCGAGTGTGGTTTCCATAGTTTTTATAGG  
CAAAATAGAACACAATTCGGTATAAAATTCCTTATTTTTCGCTTTAGTTTATTTACTTTTATAGATTTAG  
AAATATTATTAACCTTTCCCTTTTCGCTCTTAGTGAGTATGTTAATGGTATTTATGGTCTTTTATAGTTAC  
TTTAATTTTATAGCTATAATAACTATAGGATTTATATTTGAATTAGGTAAAAGCGCTCTTAAAATA  
GACAGCAGACAAAAATTATATATACCTAAATTGAACGTTAATTACCATACAGAGTATGTTGGAAT  
AGGTAAGGTTTCTAAGTAAAGTTATAGAGGCAGAAAACCAAAAAACCTACCAAAGGGTAGCTA  
ATGGGAAGCTATTAATAAATAAAGATGATAACCTATATATAGTATAGTTACTATATATTTACTATA  
ACTAGGATTATTATATATATATATATTATCTTATTGTATATTAAGATTATTATTATAAGGTATA  
ATTAATATAGTATCTTATTGTATAAGAATATAATATATTAACCTATAATTAATTTTATTTTAAATTT  
TTAATTATAATTTTTTTTTTATATCTAGATGCTTACACATCTACAGATGTAGAAGAGAACAAAATAT  
TGTTGTTATAGTAGTGGATGATATAGAAAAATATTTTATATTATTTATTTTGTAGGTAGCTTTT  
GAAGTGTTTGATAGAGAGGATATATGGACGGTAGGAGGGTATTCATTTTAATGAACAGTGGATA  
GTTTAAATTAACCTAGTTATAGTTTATGAATTTAAATTATAATTATATTAATGTAGGTATGATAGA  
ATTATGTATTGATCCTTAAGAGTTAAGAGAGATACGCCACGTATAATACATATTGGTTTAGGGT  
TGAGTATATATACTTAAGAGTTAAGAATATATATATACAATATATAATAAATATAGTAATATATTA  
ATGGTATGGACTTAACCAGGTTTATATATTATCATTTGATAAACATTAATTATAATTTTCTATTTA  
TTATTATTATTACTGTGAGATTAATAATTATTAATAATATAATTACATAGTACGTGATATTTGG  
GGATTTTATCTTATTAATTGGCAATTAATGATTCTAATCAAATTTTATTCTCTTTAGTTTAAATGGTA  
GAACAATGATCTTCTAATTCATTGGTTTTAGTTTCGATTCTAAAAAGAGATGAGTAAATAATTTTCT  
AGATCAGAAATACTACTTTTAACTACAAAAAGCTTACGCTTTTAAACATTTTTTTGATAAATAACA  
ACTATTGTTAATATTTGGCTGTCTATTGGTTTAACTACAATTACAAAATTTTTCAATTTTATAAT  
ATAAATTTAAATGAGAATATTAATAAAGTCATTCAATTATTAATAATTAGTGAATTCCTACCTTATCGA  
TGCGTCACAACCAAGTAACATTAGTTACTTGTGAAATTTTGGTTCATTATTAGCTGTTTGTTAAT  
AGTACAAATTATTACCGGTATTACATTAGCTATGCATTATAGTCCTAGTGTAATGGAAGCTTTTAA  
CTCAATAGAGCATATAATGAGAGATGTTAATAACGGGTGATTAGTTCGTTATCTACATAGTAATA  
CAGCTTCTGCTTTCTTTTCTTAGTGATTACACATAGGAAGAGGTATATATTACGGATCATATA  
GAGCTCCTCGTACTTTAGTTTGAGCTATTGGTACTGTTATATTAATTAATGATGGCTATCGGT  
TCCTAGGTATGTTTTACCTTATGGACAGATGTCATTATGAGGTGCTACAGTTATTACTAATCTTA  
TTAGTGCTATACCTGAATAGGGCAAGATATTGTTGAATTCATTTGAGGTGGTTTTCTGTAAATA  
ATGCCACTTTAAACAGATTTTTGCATTACATTTGTATTGCCTTTTGTATTAGCTGCTTTAGTTTAA  
ATGCACTTAATTGCACTTCATGATACTGCTGGTTCAAGCAATCCTCTTGGTGTTTCAGGTAATTAC  
GATAGAATTACATTTGCTCCATATTTTTATTTAAAGATTTAATTACTATTTTATATTTATTTTGT  
TTAAGTGCTTTTGTATTCTTTATGCCTAATGTTTTAGGGGATAGTGATAATTATATTATGGCTAATC  
CTATGCAAACCTCCTGCTGCTATTGTACCTGAATGATACTTATTACCTTCTATGCTATTTTAAAGATC  
TATACCTAATAAATTATTAGGTGTTATAGCGATGTTTAGTGCTATTTTAGCTATTATGTTATTACCT  
GTTACAGATTTAGGTAGATCTAGAGGTTTACAATTTAGACCATTTAGTAAATAGCTTTCTGAGTT  
TTTGTTGCTAATTTCTTAGTTTTAATGCAATTAGGTGCTAAACACGTTGAAGATCCATTTATATTAT  
TAGGTCAATTAAGTACTGTATTATACTTTAGTTATTTTGTGCTATATTACCTTTAGCTAGTTACTT  
AGATAATAGTTTAACTGATTTATCTAATAAATCTGAATTATTTTAAATAAACTAACTAAATATAT  
TAAGATTATTATTTAATATATTTTCTATTTAAGATACTATTAATTTAGTATTTTGGGTTTTAGTTTA  
TAATTTATATTATATTATGCATTACCTCCACCTTGCTTTGTAGTAAGCTAATCTGTTATTTCTTTA  
GTTAATGGTAGAACAATGATCTTCTAATTCATTGGTTTTAGTTTGAATCTAAAAAGGAAATAAG

AAATATATTCTTATTATTACTTATATAATAATTATTTCTTAAAAATATACATTTTGCATTATAGCCGT  
TTAGCTGTATTAAAATGTAAAATGATATAAAATAGAATAAAATATTTAAATTATTCCTATGTTATATT  
ATCCTATATTGCAACCATTATCAGAAGTTGTATTAATACTTGTACCTGCCTTATTAGCTGTAGCTT  
ATGTTACAGTTGCTGAAAGAAAACTATGGCTAGTATGCAAAGAAGATTAGGTCCTAATGCTGT  
AGGTTACTATGGACTATTGCAAGCATTTGCTGATGCCTTAAAACTTTTATTAAGAATATGTAG  
CTCCTACACAATCTAATATTGTTCTTTTCTTTTAGGTCCTGTAATAACTTTAATTTTGCATTATTA  
GGTTACGCTGTTATACCCTATGGTCCTGGTTCAGGGATAAGCGACATGAATTTAGGTATATTTTA  
CATGTTAGCTGTGTCATCTTTAGCTACATACGGTATTCTATTAGCTGGTTGAAGTGCGAATAGTA  
AATACGCTTTTCTAGGTTCTCTTAGAAGTACAGCTCAATTAATTAGTTATGAATTAATATTAAGTT  
CAGCTATATTAATAGTAATTATGATAACAGGAAATTTAAATTTAACTGTTTGTACTGAATCTCAAA  
GAGCTATTTGATTTATACTACCTTTATTTCTGTGTTTATAATATTTTTCATAGGATCTATAGCTGA  
GACAAATAGAGCTCCTTTTGATTTAGCCGAGGCTAACCTGCTAATCTGGTTTGGTCTGGTTATAT  
GTCACAAATTGCTAGGAAACCTTTTTATTTAAAAACAAAAGACAATTAGCAGGAAACTTAATTT  
AACCTAATTAATAATTAGATAATTAACCTCTCATAGACTAAACGTGACAATTTAATATATATA  
TATATTTATTTATATATATGATTAATAAGATATAGTCAATCATCGGTGTGAATCGACTTAAAAAA  
AAAAGCACATGGGTAAACCCATCTCCCTTATTAGGGGAATCAGAACTTGTTAGTGGGTTTCAT  
GACAGAGCATGCTGCCGTAGTTTTCGTATTCTTCTTTTAGCTGAGTACGGTAGTATTGTACTAAT  
GTGTATTTTAACTAGTATATTATTTATTGGTGGTTACTTATTATTTGAAATATCCTATGTTTTACTG  
TGGTAAATTATATTTTCTTTGAATTATTCTTTATAGACTGAGTAACATTTGTAGAGGTACAATCTTT  
ATACACTGATTTTTTAAATAATTCTATCATTGAAGGATTATTATATGGGTTTAACTAGGATTA  
AAGTTCTTTAATGATATTCACATTTATTTGAGCTAGAGCATCCTTCCCTAGAATACGATTTGATCA  
ACTAATGGGCTTCTGTTGAACAGTTTTATTACCTATTAATTTTGCAATTATTATATTAGTACCTTGT  
GTTTTATATAGTTTTAACTTATTACCTGTAAATATACCATTGTTCTAGCTCACACACCCGCCGCC  
CTACTGCCACAAGGCTACAGTACATATGAGGAGGGGAATAAGATCTAGAATACTATCCTAGTTA  
ATAATTACACTTAATAGTATACTAAATAGACCATCTATCATACTCGAGAATAGTGATAGTGTAAT  
TATACACTATTTTAACTGTATTCTACACTATTAGCATATTATTATCTTTATATGATAATAATTTTATA  
ACTTAATTTATTAGGTTACATTAACAAAAAATTCGTTAACTTTTTTCACCACTTTTAAACAAAAT  
ACGAATTTTA

>YN608

ATAACAATTCTAAAGAACATAAAGAGTTATTAGATAAAAAATAATTCACCTATACAGTTAATAAAT  
CAACTTAAAGGGTATTTTTTCATAAATCCTTATTAGCTTTAAGTTTAGCTATTACTATTTTCTCTTT  
TGCAGGTATTCTCCTCTTGTAGGGTTCTTTGCTAAACAGATGGTATTAAGCGCGGCTATTGATC  
AAGGTTATATCTTTTATCTTTAGTTGCAATATTAAGTGTATAGGAGGGGTTTATTATTTAAA  
TATAATTAAGAAATGTTCTTTTATTCACCTGACTATAAATTAACGAAGAAATTAATAATAC  
TATTAATGGTCAAATTATTAATAGAAACAATAAAATATTAATGTTGAATTTAATTATACAAATGT  
AGTTATGTCTAGTTCTGTGGCAATAACTATTTCTACTATTACATTAGTAGTTTTATTATTCATGTTT  
ATGAATAAAGAATGATTAAGTCTGGGTACTATATTGGTACAATCTTTATTTAGCTATTAATGAGTA  
GTATGACATTATTTATAGGGTTGTATCTGTTATAGCTATTTTATTTTAGCCATTAATTTATATTT  
GCTCCTCATAATCCTTATCAAGAAAAATATAGTATTTTCGAGTGTGGTTCCATAGTTTTTTAGGG  
CAAAATAGAACACAATTCGGTATAAAATCTTTATTTTGCTTTAGTTTATTTACTTTTAGATTTAG  
AAATATTATTAACTTTCCCTTTCGCTCTTAGTGAGTATGTTAATGGTATTTATGGTCTTTTAGTTAC  
TTTAATTTTATAGCTATAATAACTATAGGATTTATATTTGAATTAGGTAAAAGCGCTCTTAAATA  
GACAGCAGACAAAATTATATATACCTAAATTGAACGTTAATTACCATACAGAGTATGTTGGAAT  
AGGTAAGGTTTCTAAGTAAAGTTATAGAGGCAGAAAACCAAAAAACCTACCAAGGGTAGCTA

ATGGGAAGCTATTA AAAAATAAAAGATGATAACCTATATATAGTATAGTTACTATATATTTACTATA  
ACTAGGATTATTATATATATATATATTATCTTATTGTATATTAAGATTATTATTATAAGGTATA  
ATTAATATAGTATCTTATTGTATAAGAATATAATATATTAACCTATAATTAATTTTATTTTTAATTT  
TTAATTATAATTTTTTTTTATATCTAGATGCTTACACATCTACAGATGTAGAAGAGAACAAAATAT  
TGTTGTTATAGTAGTGGATGATATAGAAAAATATTTTTATATTATTTATTTTTGTTAGGTAGCTTTT  
GAAGTGTGGATAGAGAGGATATATGGACGGTAGGAGGGTATTCATTTTAATGAACAGTGGATA  
GTTTAAATTAACCTAGTTATAGTTTATGAATTTAAATTATAATTATATTAATGTAGGTTATGATAGA  
ATTATGTATTGATCCTTAAGAGTTAAGAGAGATACGCCACGTATAATACATATTGGTTTAGGGT  
TGAGTATATATACTTAAGAGTTAAGAATATATATATACAATATATAATAAATATAGTAATATATTA  
ATGGTATGGACTTAACCAGGTTTATATATTATCATTTGATAAACATTAATTATAATTTTTCTATTTA  
TTATTATTATTACTGTGAGATTAATAATTATTA AAAATATAATATTACATAGTACGTGATATTTGG  
GGATTTTATCTTATTAATTGGCAATTAATGATTCTAATCAAATTTTATTCTCTTAGTTTAATGGTA  
GAACAATGATCTTCTAATTCATTGGTTTTAGTTTCGATTCTAAAAAGAGATGAGTAAATAATTTTCT  
AGATCAGAAATACTACTTTTAACTACAAAAAGCTTACGCTTTTAAACATTTTTTGTAAATAACA  
ACTATTGTTAATATTTGGCTGTCTATTGGTTTAACTAACAATTACAAAATTTTTCAATTTTTATAAT  
ATAAATTTAAATGAGAATATTA AAAAGTCATTCATTATTA AAATTAGTGAATTCCTACCTTATCGA  
TGCGTCACAACCAAGTAACATTAGTTACTTGTGAAATTTTGGTTCATTATTAGCTGTTTGTTAAT  
AGTACAAATTATTACCGGTATTACATTAGCTATGCATTATAGTCCTAGTGAATGGAAGCTTTTAA  
CTCAATAGAGCATATAATGAGAGATGTTAATAACGGGTGATTAGTTCGTTATCTACATAGTAATA  
CAGCTTCTGCTTTCTTTTCTTAGTGTATTTACACATAGGAAGAGGTATATATTACGGATCATATA  
GAGCTCCTCGTACTTTAGTTTGAGCTATTGGTACTGTTATATTAATTAATGATGGCTATCGGTT  
TCCTAGGTTATGTTTTACCTTATGGACAGATGTCATTATGAGGTGCTACAGTTATTACTAATCTTA  
TTAGTGCTATACCTGAATAGGGCAAGATATTGTTGAATTCATTTGAGGTGGTTTTCTGTTAATA  
ATGCCACTTTAAACAGATTTTTTGCATTACATTTGTATTGCCTTTTGTATTAGCTGCTTTAGTTTAA  
ATGCACTTAATTGCACTTCATGATACTGCTGGTTCAAGCAATCCTCTGGTGTTTCAGGTAATTAC  
GATAGAATTACATTTGCTCCATATTTTTATTTAAAGATTTAATTACTATTTTTATATTTATTTTGT  
TTAAGTGCTTTTGTATTCTTTATGCCTAATGTTTTAGGGGATAGTGATAATTATATTATGGCTAATC  
CTATGCCAACTCCTGCTGCTATTGTACCTGAATGATACTTATTACCTTTCTATGCTATTTTAAAGATC  
TATACCTAATAAATTATTAGGTGTTATAGCGATGTTTAGTGCTATTTTAGCTATTATGTTATTACCT  
GTTACAGATTTAGGTAGATCTAGAGGTTTACAATTTAGACCATTTAGTAAATAGCTTTCTGAGTT  
TTTGTTGCTAATTTCTTAGTTTAAATGCAATTAGGTGCTAAACACGTTGAAGATCCATTTATATTAT  
TAGGTCAATTAAGTACTGTATTATACTTTAGTTATTTTGTGCTATATTACCTTTAGCTAGTTACTT  
AGATAATAGTTTAACTGATTTATCTAATAAATCTGAATTATTTTAAATAAACTAACTAAATATAT  
TAAGATTATTATTTAATATATTTTCTATTTAAGATACTATTAATTTAGTATTTTGGGTTTTCAGTTTA  
TAATTTATATTATATTATGCATTACCCTCCACCTTGCTTTGTAGTAAGCTAATCTGTTATTTCTTTA  
GTTTAATGGTAGAACAATGATCTTCTAATTCATTGGTTTTAGTTTGAATCTAAAAAGGAAATAAG  
AAATATATTCTTATTATTACTTATATAATAATTATTTCTTAAAAATATACATTTTGCATTATAGCCGT  
TTAGCTGTATTA AAATGTAAATGATATAAAATAGAATAAATATTTAAATTATTCCTATGTTATATT  
ATCCTATATTGCAACCATTATCAGAAGTTGTATTAATACTTGTACCTGCCTTATTAGCTGTAGCTT  
ATGTTACAGTTGCTGAAAGAAAACTATGGCTAGTATGCAAAGAAGATTAGGTCCTAATGCTGT  
AGGTTACTATGGACTATTGCAAGCATTTGCTGATGCCTTAAACTTTTATTA AAAGAATATGTAG  
CTCCTACACAATCTAATATTGTTCTTTTCTTTTAGGTCCTGTAATAACTTTAATTTTTGCATTATTA  
GGTTACGCTGTTATACCCTATGGTCCTGGTTCAGGGATAAGCGACATGAATTTAGGTATATTTTA  
CATGTTAGCTGTGTCATCTTTAGCTACATACGGTATTCTATTAGCTGGTTGAAGTGCGAATAGTA

AATACGCTTTTCTAGGTTCTCTTAGAAGTACAGCTCAATTAATTAGTTATGAATTAATATTAAGTT  
CAGCTATATTAATAGTAATTATGATAACAGGAAATTTAAATTTAACTGTTTGTACTGAATCTCAAA  
GAGCTATTTGATTTATACTACCTTTATTTCTGTGTTTATAATATTTTTCATAGGATCTATAGCTGA  
GACAAATAGAGCTCCTTTTGATTTAGCCGAGGCTAACCTGCTAATCTGGTTTGGTCTGGTTATAT  
GTCACAAATTGCTAGGAAACCTTTTTATTTTAAAAACAAAAGACAATTAGCAGGAACTTAATTT  
AACCTAATTAATAATATTAGATAATTAACTCTTCATAGACTAAACGTGACAATTTAATATATATA  
TATATTTATTTATATATATGATTAAATAAGATATAGTCAATCATCGGTGTGAATCGACTTAAAAAA  
AAAAGCACATGGGTAAACCCATCTCCCCTTATTAGGGGAATCAGAACTTGTTAGTGGGTTTCAT  
GACAGAGCATGCTGCCGTAGTTTTCGTATTCTTCTTTTGTAGCTGAGTACGGTAGTATTGTACTAAT  
GTGTATTTTAACTAGTATATTATTTATTGGTGGTTACTTATTATTTGAAATATCCTATGTTTTTACTG  
TGGTAAATTATATTTTCTTTGAATTATTCTTTATAGACTGAGTAACATTTGTAGAGGTACAATCTTT  
ATACACTGATTTTTTAAATAATTCTATCATTGAAGGATTATTATATGGGTTTAACTAGGATTA  
AAGTTCTTTAATGATATTCACATTTATTTGAGCTAGAGCATCCTTCCCTAGAATACGATTTGATCA  
ACTAATGGGCTTCTGTTGAACAGTTTTATTACCTATTAATTTTGAATTATTATATTAGTACCTTGT  
GTTTTATATAGTTTTAACTTATTACCTGTAAATATACCATTGTTCTAGCTCACACACCCGCCGCC  
CTACTGCCACAAGGCTACAGTACATATGAGGAGGGGAATAAGATCTAGAATACTATCCTAGTTA  
ATAATTACACTTAATAGTATACTAAATAGACCATCTATCATACTCGAGAATAGTGATAGTGAAT  
TATACACTATTTTAACTGTATTCTACACTATTAGCATATTATTATCTTTATATGATAATAATTTTATA  
ACTTAATTTATTAGGTTACATTAACAAAAAATTCGTTAACTTTTTTCACCACTTTTTAATACAAAAT  
ACGAATTTTA

>YN617

ATAACAATTCTAAAGAACATAAAGAGTTATTAGATAAAAAATAATTCACCTATACAGTTAATAAAT  
CAACTTAAAGGGTATTTTTTCATAAATCCTTTATTAGCTTTAAGTTTAGCTATTACTATTTTCTCTTT  
TGCAGGTATTCTCCTCTTGTAGGGTCTTTGCTAAACAGATGGTATTAAGCGCGGCTATTGATC  
AAGGTTATATCTTTTTATCTTTAGTTGCAATATTAAGTGTATAGGAGGGGTTTATTATTTAAA  
TATAATTAAGAAATGTTCTTTTATTCACCTGACTATAAATTAACGAAGAAATTAATAAATAC  
TATTAATGGTCAAATTATTAATAGAAACAATAAAATATTAATGTTGAATTTAATTATACAAATGT  
AGTTATGTCTAGTTCTGTGGCAATAACTATTTCTACTATTACATTAGTAGTTTTATTATTCATGTTT  
ATGAATAAAGAATGATTAAGTCTGGGTACTATATTGGTACAATCTTTATTTAGCTATTAATGAGTA  
GTATGACATTATTTATAGGGTTGTATCTGTTATAGCTATTTTATTTTGTAGCCATTAATTTATATTT  
GCTCCTCATAATCCTTATCAAGAAAAATATAGTATTTTCGAGTGTGGTTTCCATAGTTTTTTAGGG  
CAAAATAGAACACAATTCGGTATAAAATTCCTTTATTTTGTCTTAGTTTATTTACTTTTAGATTTAG  
AAATATTATTAACTTTCCCTTTCGCTCTTAGTGAGTATGTTAATGGTATTTATGGTCTTTTAGTTAC  
TTTAATTTTTTATAGCTATAATAACTATAGGATTTATATTTGAATTAGGTAAAAGCGCTCTTAAATA  
GACAGCAGACAAAAATTATATATACCTAAATTGAACGTTAATTACCATACAGAGTATGTTGGAAT  
AGGTAAGGTTTCTAAGTAAAGTTATAGAGGCAGAAAACCAAAAAACCTACCAAAGGGTAGCTA  
ATGGGAAGCTATTAATAAATAAAGATGATAACCTATATATAGTATAGTTACTATATATTTACTATA  
ACTAGGATTATTATATATATATATATTATCTTATTGTATATTAAGATTATTATTATAAGGTATA  
ATTAATATAGTATCTTATTGTATAAGAATATAATATATTAACCTATAATTAATTTTATTTTTAATTT  
TTAATTATAATTTTTTTTTATATCTAGATGCTTACACATCTACAGATGTAGAAGAGAACAAAATAT  
TGTTGTTATAGTAGTGATATAGAAAAATATTTTTATATTATTTATTTTGTAGGTAGCTTTT  
GAAGTGTGATAGAGAGGATATATGGACGGTAGGAGGGTATTCATTTAATGAACAGTGGATA  
GTTTAAATTAACCTAGTTATAGTTTATGAATTTAAATTATAATTATTAATGTAGGTTATGATAGA  
ATTATGTATTGATCCTTAAGAGTTAAGAGAGATACGCCACGTATAATACATATTGGTTTAGGGT

TGAGTATATATACTTAAGAGTTAAGAATATATATATACAATATATAATAAATATAGTAATATATTA  
ATGGTATGGACTTAACCAGGTTTATATATTATCATTTGATAAACATTAATTATAATTTTTCTATTTA  
TTATTATTATTACTGTGAGATTAATAATTATTAATAATATTACATAGTACGTGATATTTGG  
GGATTTTATCTTATTAATTGGCAATTAATGATTCTAATCAAATTTTATTCTCTTTAGTTTAAATGGTA  
GAACAATGATCTTCTAATTCATTGGTTTTAGTTCGATTCTAAAAAGAGATGAGTAAATAATTTTCT  
AGATCAGAAATACTACTTTTAACTACAAAAAGCTTACGCTTTTTAACATTTTTTGATAAATAACA  
ACTATTGTTAATATTTGGCTGTCTATTGGTTTAACTAACAATTACAAAATTTTTCAATTTTTATAAT  
ATAAATTTAAATGAGAATATTAATAAGTCATTATTATTAATAATTAGTGAATTCTTACCTTATCGA  
TGCGTCACAACCAAGTAACATTAGTTACTTGTGAAATTTTGGTTCATTATTAGCTGTTTGTTAAT  
AGTACAAATTATTACCGGTATTACATTAGCTATGCATTATAGTCCTAGTGAATGGAAGCTTTTAA  
CTCAATAGAGCATATAATGAGAGATGTTAATAACGGGTGATTAGTTCGTTATCTACATAGTAATA  
CAGCTTCTGCTTTCTTTTTCTTAGTGTATTTACACATAGGAAGAGGTATATATTACGGATCATATA  
GAGCTCCTCGTACTTTAGTTTGAGCTATTGGTACTGTTATTAATTAATGATGGCTATCGGTT  
TCCTAGGTTATGTTTTACCTTATGGACAGATGTCATTATGAGGTGCTACAGTTATTACTAATCTTA  
TTAGTGCTATACCTGAATAGGGCAAGATATTGTTGAATTCATTGAGGTGGTTTTCTGTTAATA  
ATGCCACTTTAAACAGATTTTTGCATTACATTTGTATTGCCTTTGTATTAGCTGCTTAGTTTTA  
ATGCACTTAATTGCACTTCATGATACTGCTGGTTCAAGCAATCCTCTTGGTGTTTCAGGTAATTAC  
GATAGAATTACATTTGCTCCATATTTTTATTTAAAGATTTAATTACTATTTTTATTTATTTTTGTA  
TTAAGTGCTTTTGATTCTTTATGCCTAATGTTTTAGGGGATAGTGATAATTATATTATGGCTAATC  
CTATGCCAACTCCTGCTGCTATTGTACCTGAATGATACTTATTACCTTTCTATGCTATTTTAAGATC  
TATACCTAATAAATTATTAGGTGTTATAGCGATGTTTAGTGCTATTTAGCTATTATGTTATTACCT  
GTTACAGATTTAGGTAGATCTAGAGGTTTACAATTTAGACCATTTAGTAAATAGCTTTCTGAGTT  
TTTGTTGCTAATTTCTTAGTTTTAATGCAATTAGGTGCTAAACACGTTGAAGATCCATTATATTAT  
TAGGTCAATTAAGTACTGTATTATACTTTAGTTATTTTTGTTGCTATATTACCTTTAGCTAGTTACTT  
AGATAATAGTTTAACTGATTTATCTAATAAATCTGAATTATTTTTAAATAAACTAACTAAATATAT  
TAAGATTATTATTTAATATATTTTCTATTTAAGATACTATTAATTTAGTATTTTGGGTTTTAGTTTA  
TAATTTATATTATATTATGCATTACCCTCCACCTTGCTTTGTAGTAAGCTAATCTGTTATTTCTTTA  
GTTTAATGGTAGAACAATGATCTTCTAATTCATTGGTTTTAGTTCGAATCTAAAAAGGAAATAAG  
AAATATATTCTTATTATTACTTATATAATAATTATTTCTTAAAAATATACATTTTGCATTATAGCCGT  
TTAGCTGTATTAAATGTAAATGATATAAAATAGAATAAATATTTAAATTATTCCTATGTTATATT  
ATCCTATATTGCAACCATTATCAGAAGTTGATTAATACTTGTACCTGCCTTATTAGCTGTAGCTT  
ATGTTACAGTTGCTGAAAGAAAACTATGGCTAGTATGCAAAGAAGATTAGGTCCTAATGCTGT  
AGGTTACTATGGACTATTGCAAGCATTGCTGATGCCTTAAACTTTTTATTAAGAATATGTAG  
CTCCTACACAATCTAATATTGTTCTTTCTTTTAGGTCCTGTAATAACTTTAATTTTTGCATTATTA  
GGTTACGCTGTTATACCCTATGGTCCTGGTTCAGGGATAAGCGACATGAATTTAGGTATATTTTA  
CATGTTAGCTGTGTCATCTTTAGCTACATACGGTATTCTATTAGCTGGTTGAAGTGCGAATAGTA  
AATACGCTTTCTAGGTTCTCTTAGAAGTACAGCTCAATTAATTAGTTATGAATTAATATTAAGTT  
CAGCTATATTAATAGTAATTATGATAACAGGAAATTTAAATTTAACTGTTTGTACTGAATCTCAAA  
GAGCTATTTGATTTATACTACCTTTATTTCTGTGTTTATAATTTTTTCATAGGATCTATAGCTGA  
GACAAATAGAGCTCCTTTGATTTAGCCGAGGCTAACCTGCTAATCTGGTTTGGTCTGGTTATAT  
GTCACAAATTGCTAGGAAACCTTTTTATTTAAAAACAAAAGACAATTAGCAGGAACTTAATTT  
AACCTAATTAATAATATTAGATAATTAACTCTTCATAGACTAAACGTGACAATTTAATATATATA  
TATATTTATTTATATATATGATTAAATAAGATATAGTCAATCATCGGTGTGAATCGACTTAAAAAA  
AAAAGCACATGGGTAAACCCATCTCCCCTTATTAGGGGAATCAGAACTTGTTAGTGGGTTTAT

GACAGAGCATGCTGCCGTAGTTTTCGTATTCTTCTTTTAGCTGAGTACGGTAGTATTGTACTAAT  
GTGTATTTAACTAGTATATTATTTATTGGTGGTTACTTATTATTTGAAATATCCTATGTTTTACTG  
TGGTAAATTATATTTTCTTTGAATTATTCTTTATAGACTGAGTAACATTTGTAGAGGTACAATCTTT  
ATACACTGATTTTTTAAATAATTCTATCATTGAAGGATTATTATATGGGTTTAATCTAGGATTAAA  
AAGTTCTTTAATGATATTCACATTTATTTGAGCTAGAGCATCCTTCCCTAGAATACGATTTGATCA  
ACTAATGGGCTTCTGTTGAACAGTTTTATTACCTATTAATTTTGCAATTATTATATTAGTACCTTGT  
GTTTTATATAGTTTTAACTTATTACCTGTAAATATACCATTGTTCTAGCTCACACACCCGCCGCC  
CTACTGCCACAAGGCTACAGTACATATGAGGAGGGGAATAAGATCTAGAATACTATCCTAGTTA  
ATAATTACACTTAATAGTATACTAAATAGACCATCTATCATACTCGAGAATAGTGATAGTGTAAT  
TATACACTATTTTAACTGTATTCTACACTATTAGCATATTATTATCTTTATATGATAATAATTTTATA  
ACTTAATTTATTAGGTTACATTAACAAAAAATTCGTTAACTTTTTTCACCACTTTTAAATACAAAAT  
ACGAATTA

>YN626

ATAACAATTCTAAAGAACATAAAGAGTTATTAGATAAAAAATAATTCACCTATACAGTTAATAAAT  
CAACTTAAAGGGTATTTTTTCATAAATCCTTTATTAGCTTTAAGTTTAGCTATTACTATTTTCTCTTT  
TGCAGGTATTCCTCCTCTGTAGGGTCTTTGCTAAACAGATGGTATTAAGCGCGGCTATTGATC  
AAGGTTATATCTTTTTATCTTTAGTTGCAATATTAAGTGTATAGGAGGGGTTTATTATTTAAA  
TATAATTAAGAAATGTTCTTTTATTCACCTGACTATAAATTAACGAAGAAATTAATAAATAC  
TATTAATGGTCAAATTATTAATAGAAACAATAAAATATTAAATGTTGAATTTAATTATACAAATGT  
AGTTATGTCTAGTTCTGTGGCAATAACTATTTCTACTATTACATTAGTAGTTTTATTATTCATGTTT  
ATGAATAAAGAATGATTAAGTCTGGGTACTATATTGGTACAATCTTTATTTAGCTATTAATGAGTA  
GTATGACATTATTTATAGGGTTTGTATCTGTTATAGCTATTTTATTTTAGCCATTAATTTTATATT  
GCTCCTCATAATCCTTATCAAGAAAAATATAGTATTTTCGAGTGTGGTTCCATAGTTTTTAGGG  
CAAAATAGAACACAATTCGGTATAAAATCTTTATTTTGTCTTAGTTTATTTACTTTTAGATTTAG  
AAATATTATTAACTTTCCCTTTCGCTCTTAGTGAGTATGTTAATGGTATTTATGGTCTTTTAGTTAC  
TTTAATTTTATAGCTATAATAACTATAGGATTTATATTGAATTAGGTAAAAGCGCTCTTAAATA  
GACAGCAGACAAAAATTATATATACCTAAATTGAACGTTAATTACCATACAGAGTATGTTGGAAT  
AGGTAAGGTTTCTAAGTAAAGTTATAGAGGCAGAAAACCAAAAAACCTACCAAGGGTAGCTA  
ATGGGAAGCTATTAATAAATAAAGATGATAACCTATATATAGTATAGTTACTATATATTTACTATA  
ACTAGGATTATTATATATATATATATTATCTTATTGTATATTAAGATTATTATTATAAGGTATA  
ATTAATATAGTATCTTATTGTATAAGAATATAATATATTAACCTATAATTAATTTTATTTTAAATTT  
TTAATTATAATTTTTTTTTATATCTAGATGCTTACACATCTACAGATGTAGAAGAGAACAAAATAT  
TGTTGTTATAGTAGTGGATGATATAGAAAAATATTTTATATTATTTATTTTGTAGGTAGCTTTT  
GAAGTGTGATAGAGAGGATATATGGACGGTAGGAGGGTATTCATTTAATGAACAGTGGATA  
GTTTAAATTAACCTAGTTATAGTTTATGAATTTAAATTATAATTATATTAATGTAGGTATGATAGA  
ATTATGTATTGATCCTTAAGAGTTAAGAGAGATACGCCACGTATAATACATATTGGTTTAGGGT  
TGAGTATATATACTTAAGAGTTAAGAATATATATATACAATATATAATAAATATAGTAATATATTA  
ATGGTATGGACTTAACCAGTTTATATATTATCATTGATAAACATTAATTATAATTTTCTATTTA  
TTATTATTATTAAGTGAGATTAATAATTATTAATAATATTACATAGTACGTGATATTTGG  
GGATTTTATCTTATTAATTGGCAATTAATGATTCTAATCAAATTTTATTCTTTAGTTTAAATGGTA  
GAACAATGATCTTCTAATTCATTGGTTTTAGTTTCGATTCTAAAAAGAGATGAGTAAATAATTTTCT  
AGATCAGAAATACTACTTTTAACTACAAAAAGCTTACGCTTTTAAACATTTTTTTGATAAATAACA  
ACTATTGTTAATATTTGGCTGTCTATTGGTTTAACTACAATTACAAAATTTTTCAATTTTATAAT  
ATAAATTTAAATGAGAATATTAATAAAGTCATTCAATTATTAATAATTAGTGAATCTTACCTTATCGA

TGCGTCACAACCAAGTAACATTAGTTACTTGTGAAATTTTGGTTCATTATTAGCTGTTTGTTAAT  
AGTACAAATTATTACCGGTATTACATTAGCTATGCATTATAGTCCTAGTGTAATGGAAGCTTTTAA  
CTCAATAGAGCATATAATGAGAGATGTTAATAACGGGTGATTAGTTCGTTATCTACATAGTAATA  
CAGCTTCTGCTTTCTTTTCTTAGTGATTTACACATAGGAAGAGGTATATATTACGGATCATATA  
GAGCTCCTCGTACTTTAGTTTGAGCTATTGGTACTGTTATATTAATTAATGATGGCTATCGGT  
TCCTAGGTTATGTTTTACCTTATGGACAGATGTCATTATGAGGTGCTACAGTTACTAATCTTA  
TTAGTGCTATACCTGAATAGGGCAAGATATTGTTGAATTCATTTGAGGTGGTTTTCTGTTAATA  
ATGCCACTTTAAACAGATTTTTGCATTACATTTGTATTGCCTTTGTATTAGCTGCTTAGTTTTA  
ATGCACTTAATTGCACTTCATGATACTGCTGGTTCAAGCAATCCTCTGGTGTTTCAGGTAATTAC  
GATAGAATTACATTTGCTCCATATTTTTATTTAAAGATTTAATTACTATTTTTATATTTATTTTGT  
TTAAGTGCTTTGTATTCTTTATGCCTAATGTTTTAGGGGATAGTGATAATTATATTATGGCTAATC  
CTATGCAAACCTCCTGCTGCTATTGTACCTGAATGATACTTATTACCTTTCTATGCTATTTAAGATC  
TATACCTAATAAATTATTAGGTGTTATAGCGATGTTTAGTGCTATTTAGCTATTATGTTATTACCT  
GTTACAGATTTAGGTAGATCTAGAGGTTTACAATTTAGACCATTTAGTAAATAGCTTTCTGAGTT  
TTTGTTGCTAATTTCTTAGTTTTAATGCAATTAGGTGCTAAACACGTTGAAGATCCATTTATATTAT  
TAGGTCAATTAAGTACTGTATTATACTTTAGTTATTTTGTTGCTATATTACCTTTAGCTAGTTACTT  
AGATAATAGTTTAACTGATTTATCTAATAAATCTGAATTATTTTAAATAAAACTAACTAAATATAT  
TAAGATTATTATTTAATATATTTTCTATTTAAGATACTATTAATTTAGTATTTTGGGTTTTAGTTTA  
TAATTTATATTATATTATGCATTACCCTCCACCTTGCTTTGTAGTAAGCTAATCTGTTATTTCTTTA  
GTTTAATGGTAGAACAATGATCTTCTAATTCATTGGTTTTAGTTTGAATCTAAAAAGGAAATAAG  
AAATATATTCTTATTATTACTTATATAATAATTATTTCTTAAAAATATACATTTTGCAATTATAGCCGT  
TTAGCTGTATTAAATGTAAATGATATAAAATAGAATAAATATTTAAATTATTCCTATGTTATATT  
ATCCTATATTGCAACCATTATCAGAAGTTGTATTAATACTTGTACCTGCCTTATTAGCTGTAGCTT  
ATGTTACAGTTGCTGAAAGAAAACTATGGCTAGTATGCAAAGAAGATTAGGTCCTAATGCTGT  
AGGTTACTATGGACTATTGCAAGCATTGCTGATGCCTTAAACTTTTATTTAAAGAATATGTAG  
CTCCTACACAATCTAATATTGTTCTTTTCTTTTAGGTCTGTAAATAACTTTAATTTTGCAATTATTA  
GGTTACGCTGTTATACCCTATGGTCCTGGTTCAGGGATAAGCGACATGAATTTAGGTATATTTTA  
CATGTTAGCTGTGTCATCTTTAGCTACATACGGTATTCTATTAGCTGGTTGAAGTGCGAATAGTA  
AATACGCTTTTCTAGGTTCTCTTAGAAGTACAGCTCAATTAATTAGTTATGAATTAATATTAAGTT  
CAGCTATATTAATAGTAATTATGATAACAGGAAATTTAAATTTAACTGTTTGACTGAATCTCAAA  
GAGCTATTTGATTTATACTACCTTTATTTCTGTGTTTATAATATTTTTCATAGGATCTATAGCTGA  
GACAAATAGAGCTCCTTTGATTTAGCCGAGGCTAACCTGCTAATCTGGTTTGGTCTGGTTATAT  
GTCACAAATTGCTAGGAAACCTTTTTATTTAAAAACAAAAGACAATTAGCAGGAAACTTAATTT  
AACCTAATTAATAAATTATTAGATAAATAAATCTTTCATAGACTAAACGTGACAATTTAATATATATA  
TATATTTATTTATATATATGATTAATAAAGATATAGTCAATCATCGGTGTGAATCGACTTAAAAAA  
AAAAGCACATGGGTAAACCCATCTCCCCTTATTAGGGGAATCAGAACTTGTTAGTGGGTTTCAT  
GACAGAGCATGCTGCCGTAGTTTTCGTATTCTTCTTTTAGCTGAGTACGGTAGTATTGTACTAAT  
GTGTATTTTAACTAGTATATTATTTATTGGTGGTTACTTATTATTTGAAATATCCTATGTTTTACTG  
TGGTAAATTATATTTTCTTTGAATTATCTTTATAGACTGAGTAACATTTGTAGAGGTACAATCTTT  
ATACACTGATTTTTTAAATAATTCTATCATTGAAGGATTATTATATGGGTTAATCTAGGATTAAA  
AAGTTCTTTAATGATATTCACATTTATTTGAGCTAGAGCATCCTTCCCTAGAATACGATTTGATCA  
ACTAATGGGCTTCTGTTGAACAGTTTTATTACCTATTAATTTTGCAATTATTATATTAGTACCTTGT  
GTTTTATATAGTTTTAACTTATTACCTGTAAATATACCATTGTTCTAGCTCACACACCCGCCGCC  
CTACTGCCACAAGGCTACAGTACATATGAGGAGGGGAAGTAAAGATCTAGAAGTATCCTAGTTA

ATAATTACACTTAATAGTATACTAAATAGACCATCTATCATACTCGAGAATAGTGATAGTGTAAT  
TATACACTATTTTAACTGTATTCTACACTATTAGCATATTATTATCTTTATATGATAATAATTTTATA  
ACTTAATTTATTAGGTTACATTAACAAAAAATTCGTTAACTTTTTTCACCACTTTTAAATACAAAAT  
ACGAATTTTA

>YN634

ATAACAATTCTAAAGAACATAAAGAGTTATTAGATAAAAAATAATTCACCTATACAGTTAATAAAT  
CAACTTAAAGGGTATTTTTTCATAAATCCTTTATTAGCTTTAAGTTTAGCTATTACTATTTCTCTTT  
TGCAGGTATTCCTCCTCTGTAGGGTTCTTTGCTAAACAGATGGTATTAAGCGCGGCTATTGATC  
AAGGTTATATCTTTTTATCTTTAGTTGCAATATTAAGTGTATAGGAGGGGTTTATTATTTAAA  
TATAATTAAGAAATGTTCTTTTATTCACCTGACTATAAATTAACGAAGAAATTAATAAATAC  
TATTAATGGTCAAATTATTAATAGAAACAATAAATATTAATGTTGAATTTAATTATACAAATGT  
AGTTATGTCTAGTTCTGTGGCAATAACTATTTCTACTATTACATTAGTAGTTTTATTATTCATGTTT  
ATGAATAAAGAATGATTAAGTCTGGGTACTATATTGGTACAATCTTTATTTAGCTATTAATGAGTA  
GTATGACATTATTTATAGGGTTTGTATCTGTTATAGCTATTTTATTTTAGCCATTAATTTTATATTT  
GCTCCTCATAATCCTTATCAAGAAAAATATAGTATTTTCGAGTGTGGTTTCCATAGTTTTTTAGGG  
CAAAATAGAACACAATTCGGTATAAAATCCTTATTTTGTCTTAGTTTATTTACTTTTAGATTTAG  
AAATATTATTAACTTTCCCTTTCGCTCTTAGTGAGTATGTTAATGGTATTTATGGTCTTTTAGTTAC  
TTTAATTTTATAGCTATAATAACTATAGGATTTATATTTGAATTAGGTAAAAGCGCTCTTAAATA  
GACAGCAGACAAAAATTATATATACCTAAATTGAACGTTAATTACCATACAGAGTATGTTGGAAT  
AGGTAAGGTTTCTAAGTAAAGTTATAGAGGCAGAAAACCAAAAAACCTACCAAAGGGTAGCTA  
ATGGGAAGCTATTAATAAAGATGATAACCTATATATAGTATAGTTACTATATATTTACTATA  
ACTAGGATTATTATATATATATATTATCTTATTGTATATTAAGATTATTATTATTATAAGGTATA  
ATTAATATAGTATCTTATTGTATAAGAATATAATATATTAACCTATAATTAATTTTATTTTAAATTT  
TTAATTATAATTTTTTTTTATATCTAGATGCTTACACATCTACAGATGTAGAAGAGAACAAAATAT  
TGTTGTTATAGTAGTGGATGATATAGAAAAATATTTTTATATTATTTATTTTGTAGGTAGCTTTT  
GAAGTGTTTGATAGAGAGGATATATGGACGGTAGGAGGGTATTCATTTTAATGAACAGTGGATA  
GTTTAAATTAACCTAGTTATAGTTTATGAATTTAAATTATAATTATATTAATGTAGGTTATGATAGA  
ATTATGTATTGATCCTTAAGAGTTAAGAGAGATACGCCACGTATAATACATATTGGTTTAGGGT  
TGAGTATATATACTTAAGAGTTAAGAATATATATATACAATATATAATAAATATAGTAATATATTA  
ATGGTATGGACTTAACCAGGTTTATATATTATCATTGATAAACATTAATTATAATTTTCTATTTA  
TTATTATTATTACTGTGAGATTAATAATTATTAATAATATTACATAGTACGTGATATTTGG  
GGATTTTATCTTATTAATTGGCAATTAATGATTCTAATCAAATTTTATTCTCTTTAGTTTAAATGGTA  
GAACAATGATCTTCTAATTCATTGGTTTTAGTTTCGATTCTAAAAAGAGATGAGTAAATAATTTTCT  
AGATCAGAAATACTACTTTTAACTACAAAAGCTTACGCTTTTAAACATTTTTTTGATAAATAACA  
ACTATTGTTAATATTTGGCTGTCTATTGGTTTAACTAACAATTACAAAATTTTTCAATTTTTATAAT  
ATAAATTTAAATGAGAATATTAATAAGTCATTATTATTAATAATAGTGAATTCTTACCTTATCGA  
TGCCTCACAAACCAAGTAACATTAGTTACTTGTGAAATTTTGGTTCATTATTAGCTGTTTGTAAAT  
AGTACAAATTATTACCGGTATTACATTAGCTATGCATTATAGTCCTAGTGAATGGAAGCTTTTAA  
CTCAATAGAGCATATAATGAGAGATGTTAATAACGGGTGATTAGTTCGTTATCTACATAGTAATA  
CAGCTTCTGCTTTCTTTTCTTAGTGTATTTACACATAGGAAGAGGTATATATTACGGATCATATA  
GAGCTCCTCGTACTTTAGTTTGAGCTATTGGTACTGTTATATTAATTAATGATGGCTATCGGTT  
TCCTAGGTTATGTTTTACCTTATGGACAGATGTCATTATGAGGTGCTACAGTTATTACTAATCTTA  
TTAGTGCTATACCTGAATAGGGCAAGATATTGTTGAATTCATTTGAGGTGGTTTTCTGTAAATA  
ATGCCACTTAAACAGATTTTTTGCATTACATTTGTATTGCCTTTGTATTAGCTGCTTTAGTTTAA

ATGCACTTAATTGCACTTCATGATACTGCTGGTTCAAGCAATCCTCTTGGTGTTTCAGGTAATTAC  
GATAGAATTACATTTGCTCCATATTTTTATTTAAAGATTTAATTACTATTTTTATATTTATTTTTGTA  
TTAAGTGCTTTTGATTCTTTATGCCTAATGTTTTAGGGGATAGTGATAATTATATTATGGCTAATC  
CTATGCAAACCTCCTGCTGCTATTGTACCTGAATGATACTTATTACCTTTCTATGCTATTTTAAGATC  
TATACCTAATAAATTATTAGGTGTTATAGCGATGTTTAGTGCTATTTTAGCTATTATGTTATTACCT  
GTTACAGATTTAGGTAGATCTAGAGGTTTACAATTTAGACCATTTAGTAAAATAGCTTTCTGAGTT  
TTTGGTGCTAATTTCTTAGTTTTAATGCAATTAGGTGCTAAACACGTTGAAGATCCATTTATATTAT  
TAGGTCAATTAAGTACTGTATTATACTTTAGTTATTTTTGTTGCTATATTACCTTTAGCTAGTACTT  
AGATAATAGTTTAACTGATTTATCTAATAAATCTGAATTATTTTTAAATAAACTAACTAAATATAT  
TAAGATTATTATTTAATATATTTTCTATTTAAGATACTATTAATTTAGTATTTTGGGTTTTTCAGTTTA  
TAATTTATATTATATTATGCATTACCCTCCACCTTGCTTTGTAGTAAGCTAATCTGTTATTTCTTTA  
GTTTAATGGTAGAACAATGATCTTCTAATTCATTGGTTTTAGTTCGAATCTAAAAAGGAAATAAG  
AAATATATTCTTATTATTACTTATATAATAATTATTTCTTAAAAATATACATTTTGCAATTATAGCCGT  
TTAGCTGTATTAATAATGTAAATGATATAAAATAGAATAAATATTTAAATTATTCCTATGTTATATT  
ATCCTATATTGCAACCATTATCAGAAGTTGTATTAATACTTGTACCTGCCTTATTAGCTGTAGCTT  
ATGTTACAGTTGCTGAAAGAAAACTATGGCTAGTATGCAAAGAAGATTAGGTCCTAATGCTGT  
AGGTTACTATGGACTATTGCAAGCATTTGCTGATGCCTTAAACCTTTTATTAAGAATATGTAG  
CTCCTACACAATCTAATATTGTTCTTTTCTTTTAGGTCCTGTAATAACTTTAATTTTGCATTATTA  
GGTTACGCTGTTATACCCTATGGTCCTGGTTCAGGGATAAGCGACATGAATTTAGGTATATTTTA  
CATGTTAGCTGTGTCATCTTTAGCTACATACGGTATTCTATTAGCTGGTTGAAGTGCGAATAGTA  
AATACGCTTTTCTAGGTTCTCTTAGAAGTACAGCTCAATTAATTAGTTATGAATTAATTAAGTT  
CAGCTATATTAATAGTAATTATGATAACAGGAAATTTAAATTTAACTGTTTGTACTGAATCTCAAA  
GAGCTATTTGATTTATACTACCTTTATTTCTGTGTTTATAATATTTTTCATAGGATCTATAGCTGA  
GACAAATAGAGCTCCTTTTGATTTAGCCGAGGCTAACCTGCTAATCTGGTTTGGTCTGGTTATAT  
GTCACAAATTGCTAGGAAACCTTTTTATTTAAAAACAAAAGACAATTAGCAGGAACTTAATTT  
AACCTAATTAATAATATTAGATAAATAAATCTTTCATAGACTAAACGTGACAATTTAATATATATA  
TATATTTATTTATATATATGATTAATAAGATATAGTCAATCATCGGTGTGAATCGACTTAAAAAA  
AAAAGCACATGGGTAAACCCATCTCCCCTTATTAGGGGAATCAGAACTTGTTAGTGGGTTTCAT  
GACAGAGCATGCTGCCGTAGTTTTCGTATTCTTCTTTTATAGCTGAGTACGGTAGTATTGTACTAAT  
GTGTATTTTAACTAGTATATTATTTATTGGTGGTTACTTATTATTTGAAATATCCTATGTTTTTACTG  
TGGTAAATTATATTTTCTTTGAATTATTCTTTATAGACTGAGTAACATTTGTAGAGGTACAATCTTT  
ATACACTGATTTTTTAAATAATTCTATCATTGAAGGATTATTATATGGGTTTAACTAGGATTA  
AAGTTCTTTAATGATATTCACATTTATTTGAGCTAGAGCATCCTTCCCTAGAATACGATTTGATCA  
ACTAATGGGCTTCTGTTGAACAGTTTTATTACCTATTAATTTTGAATTATTATATTAGTACCTTGT  
GTTTTATATAGTTTTAACTTATTACCTGTAAATATACCATTGTTCTAGCTCACACACCCGCCGCC  
CTACTGCCACAAGGCTACAGTACATATGAGGAGGGGAATAAGATCTAGAACTATCCTAGTTA  
ATAATTACACTTAATAGTATACTAAATAGACCATCTATCATACTCGAGAATAGTGATAGTGAAT  
TATACACTATTTTAACTGTATTCTACACTATTAGCATATTATTATCTTTATATGATAATAATTTTATA  
ACTTAATTTATTAGGTTACATTAACAAAAAATTCGTTAACTTTTTTACCACCTTTTAAATACAAAAT  
ACGAATTTTA

>YN635

ATAACAATTCTAAAGAACATAAAGAGTTATTAGATAAAAAATAATTCACCTATACAGTTAATAAAT  
CAACTTAAAGGTATTTTTTCATAAATCCTTTATTAGCTTTAAGTTTAGCTATTACTATTTTCTCTTT  
TGCAGGTATTCCTCCTCTTGTAGGGTTCTTTGCTAAACAGATGGTATTAAGCGCGGCTATTGATC

AAGGTTATATCTTTTTATCTTTAGTTGCAATATTAAGTGTATAGGAGGGGTTTATTATTTAAA  
TATAATTAAGAAATGTTCTTTTATTCACCTGACTATAAATTAACGAAGAAATTAATAATAC  
TATTAATGGTCAAATTATTAAGAAACAATAAAATATTAATGTTGAATTTAATTATACAAATGT  
AGTTATGTCTAGTTCTGTGGCAATAACTATTTCTACTATTACATTAGTAGTTTTATTATTCATGTTT  
ATGAATAAAGAATGATTAAGTCTGGGTACTATATTGGTACAATCTTTATTTAGCTATTAATGAGTA  
GTATGACATTATTTATAGGGTTTGTATCTGTTATAGCTATTTTATTTTAGCCATTAATTTTATATTT  
GCTCCTCATAATCCTTATCAAGAAAAATATAGTATTTTCGAGTGTGGTTTCCATAGTTTTTTAGGG  
CAAAATAGAACACAATTCGGTATAAAATCTTTATTTTGCTTTAGTTTATTTACTTTTAGATTTAG  
AAATATTATTAACCTTCCCTTCGCTCTTAGTGAGTATGTTAATGGTATTTATGGTCTTTTAGTTAC  
TTTAATTTTATAGCTATAATAACTATAGGATTTATATTTGAATTAGGTAAGCGCTCTTAAATA  
GACAGCAGACAAAAATTATATACCTAAATTGAACGTTAATTACCATACAGAGTATGTTGGAAT  
AGGTAAGGTTTCTAAGTAAAGTTATAGAGGCAGAAAACCAAAAAACCTACCAAAGGGTAGCTA  
ATGGGAAGCTATTAATAAAAGATGATAACCTATATATAGTATAGTTACTATATATTTACTATA  
ACTAGGATTATTATATATATATATATTATCTTATTGTATATTAAGATTATTATTATAAGGTATA  
ATTAATATAGTATCTTATTGTATAAGAATATAATATATTAACCTATAATTAATTTTATTTTAAATTT  
TTAATTATAATTTTTTTTATATCTAGATGCTTACACATCTACAGATGTAGAAGAGAACAAAATAT  
TGTTGTTATAGTAGTGGATGATATAGAAAAATATTTTATATTATTTATTTTGTAGGTAGCTTTT  
GAAGTGTGATAGAGAGGATATATGGACGGTAGGAGGTATTCATTTAATGAACAGTGGATA  
GTTTAAATTAACCTAGTTATAGTTTATGAATTTAAATTATAATTATATTAATGTAGGTTATGATAGA  
ATTATGTATTGATCCTTAAGAGTTAAGAGAGATACGCCACGTATAATACATATTGGTTTAGGGT  
TGAGTATATATACTTAAGAGTTAAGAATATATATACAATATATAATAAATATAGTAATATATTA  
ATGGTATGGACTTAACCAGGTTTATATATTATCATTTGATAAACATTAATTATAATTTTCTATTTA  
TTATTATTATACTGTGAGATTAATAATTATTAATAATATTACATAGTACGTGATATTTGG  
GGATTTTATCTTATTAATTGGCAATTAATGATTCTAATCAAATTTTATTCTCTTTAGTTTAAATGGTA  
GAACAATGATCTTCTAATTCATTGGTTTTAGTTGATTCTAAAAAGAGATGAGTAAATAATTTTCT  
AGATCAGAAATACTACTTTTAACTACAAAAAGCTTACGCTTTTAAACATTTTTTGATAAATAACA  
ACTATTGTTAATATTTGGCTGTCTATTGGTTTAACTAACAATTACAAAATTTTTCAATTTTTATAAT  
ATAAATTTAAATGAGAATATTAATAAGTCATTATTATTAATAATTAGTGAATCTTACCTTATCGA  
TGCGTCACAACCAAGTAACATTAGTTACTTGTGAAATTTTGGTTCATTATTAGCTGTTTGTTAAT  
AGTACAAATTATTACCGGTATTACATTAGCTATGCATTATAGTCCTAGTGAATGGAAGCTTTTAA  
CTCAATAGAGCATATAATGAGAGATGTTAATAACGGGTGATTAGTTCGTTATCTACATAGTAATA  
CAGCTTCTGCTTCTTTTCTTAGTGTATTTACACATAGGAAGAGGTATATATTACGGATCATATA  
GAGCTCCTCGTACTTTAGTTGAGCTATTGGTACTGTTATATTAATATTAATGATGGCTATCGGTT  
TCCTAGGTTATGTTTTACCTTATGGACAGATGTCATTATGAGGTGCTACAGTTATTACTAATCTTA  
TTAGTGCTATACCTGAATAGGGCAAGATATTGTTGAATTCATTTGAGGTGGTTTTCTGTTAATA  
ATGCCACTTTAAACAGATTTTTGCATTACATTTGTATTGCCTTTGTATTAGCTGCTTAGTTTA  
ATGCACTTAATTGCACTTCATGATACTGCTGGTTCAAGCAATCCTCTTGGTGTTTCAGGTAATTAC  
GATAGAATTACATTTGCTCCATATTTTTATTTAAAGATTTAATTACTATTTTATATTTATTTTGT  
TTAAGTGCTTTTGTATTCTTTATGCCTAATGTTTTAGGGGATAGTGATAATTATATTATGGCTAATC  
CTATGCAAACCTCCTGCTGCTATTGTACCTGAATGATACTTATTACCTTTCTATGCTATTTTAAAGATC  
TATACCTAATAAATTATTAGGTGTTATAGCGATGTTTAGTGCTATTTAGCTATTATGTTATTACCT  
GTTACAGATTTAGGTAGATCTAGAGGTTTACAATTTAGACCATTTAGTAAATAGCTTTCTGAGTT  
TTTGTTGCTAATTTCTTAGTTTAAATGCAATTAGGTGCTAAACACGTTGAAGATCCATTTATATTAT  
TAGGTCAATTAAGTACTGTATTATACTTTAGTTATTTTGTGCTATATTACCTTAGCTAGTTACTT

AGATAATAGTTTAACTGATTTATCTAATAAATCTGAATTATTTTTAAATAAACTAACTAAATATAT  
TAAGATTATTATTTAATATATTTTCTATTTAAGATACTATTAATTTAGTATTTTGGGTTTTAGTTTA  
TAATTTATATTATATTATGCATTACCTCCACCTTGCTTTGTAGTAAGCTAATCTGTTATTTCTTTA  
GTTTAATGGTAGAACAATGATCTTCTAATTCATTGGTTTTAGTTCGAATCTAAAAAGGAAATAAG  
AAATATATTCTTATTATTACTTATATAATAATTATTTCTTAAAAATATACATTTTGCATTATAGCCGT  
TTAGCTGTATTAAAATGTAAAATGATATAAAATAGAATAAATATTTAAATTATTCCTATGTTATATT  
ATCCTATATTGCAACCATTATCAGAAAGTTGTATTAATACTTGTACCTGCCTTATTAGCTGTAGCTT  
ATGTTACAGTTGCTGAAAGAAAACTATGGCTAGTATGCAAAGAAGATTAGGTCCTAATGCTGT  
AGGTTACTATGGACTATTGCAAGCATTGCTGATGCCTTAAACTTTTTATTAAGAATATGTAG  
CTCCTACACAATCTAATATTGTTCTTTTCTTTTAGGTCCTGTAATAACTTTAATTTTTGCATTATTA  
GGTTACGCTGTTATACCCTATGGTCCTGGTTCAGGGATAAGCGACATGAATTTAGGTATATTTTA  
CATGTTAGCTGTGTCATCTTTAGCTACATACGGTATTCTATTAGCTGGTTGAAGTGCGAATAGTA  
AATACGCTTTTCTAGGTTCTCTTAGAAGTACAGCTCAATTAATTAGTTATGAATTAATTAAGTT  
CAGCTATATTAATAGTAATTATGATAACAGGAAATTTAAATTTAACTGTTTGTACTGAATCTCAAA  
GAGCTATTTGATTTATACTACCTTTATTTCTGTGTTTATAATTTTTCATAGGATCTATAGCTGA  
GACAAATAGAGCTCCTTTTGATTTAGCCGAGGCTAACCTGCTAATCTGGTTTGGTCTGGTTATAT  
GTCACAAATTGCTAGGAAACCTTTTTATTTAAAAACAAAAGACAATTAGCAGGAAACTTAATTT  
AACCTAATTAATAATTAGATAATTAACTCTTCATAGACTAAACGTGACAATTAATATATATA  
TATATTTATTTATATATATGATTAAATAAGATATAGTCAATCATCGGTGTGAATCGACTTAAAAAA  
AAAAGCACATGGGTAAACCCATCTCCCCTTATTAGGGGAATCAGAACTTGTTAGTGGGTTTCAT  
GACAGAGCATGCTGCCGTAGTTTTCGTATTCTTCTTTTAGCTGAGTACGGTAGTATTGTACTAAT  
GTGTATTTTAACTAGTATATTATTTATTGGTGGTTACTTATTATTTGAAATATCCTATGTTTTACTG  
TGGTAAATTATATTTCTTTGAATTATTCTTTATAGACTGAGTAACATTTGTAGAGGTACAATCTTT  
ATACACTGATTTTTTAAATAATTCTATCATTGAAGGATTATTATATGGGTTTAACTAGGATTAAA  
AAGTTCTTTAATGATATTCACATTTATTTGAGCTAGAGCATCCTTCCCTAGAATACGATTTGATCA  
ACTAATGGGCTTCTGTTGAACAGTTTTATTACCTATTAATTTTGCAATTATTATATTAGTACCTTGT  
GTTTTATATAGTTTTAACTTATTACCTGTAAATATACCATTGTTCTAGCTCACACACCCGCCGCC  
CTACTGCCACAAGGCTACAGTACATATGAGGAGGGGAACTAAAGATCTAGAACTATCCTAGTTA  
ATAATTACACTTAATAGTATACTAAATAGACCATCTATCATACTCGAGAATAGTGATAGTGAAT  
TATACACTATTTTAACTGTATTCTACACTATTAGCATATTATTATCTTTATATGATAATAATTTATA  
ACTTAATTTATTAGGTTACATTAACAAAAAATTCGTTAACTTTTTTCACCACTTTTAAATACAAAAT  
ACGAATTTTA

>YN640

ATAACAATTCTAAAGAACATAAAGAGTTATTAGATAAAAAATAATTCACCTATACAGTTAATAAAT  
CAACTTAAAGGGTATTTTTTCATAAATCCTTTATTAGCTTTAAGTTTAGCTATTACTATTTCTCTTT  
TGCAGGTATTCCTCCTCTTGTAGGGTTCTTGCTAAACAGATGGTATTAAGCGCGGCTATTGATC  
AAGGTTATATCTTTTTATCTTTAGTTGCAATATTAAGTGTATAGGAGGGGTTTATTATTTAAA  
TATAATTAAGAAATGTTCTTTTATTCACCTGACTATAAATTAAACGAAGAAATTAATAAATAC  
TATTAATGGTCAAATTATTAATAGAAACAATAAAATATTAAATGTTGAATTTAATTATACAAATGT  
AGTTATGTCTAGTTCTGTGGCAATAACTATTTCTACTATTACATTAGTAGTTTTATTATTCATGTTT  
ATGAATAAAGAATGATTAAGTCTGGGTACTATATTGGTACAATCTTTATTTAGCTATTAATGAGTA  
GTATGACATTATTTATAGGGTTTGTATCTGTTATAGCTATTTTATTTTAGCCATTAATTTATATTT  
GCTCCTCATAATCCTTATCAAGAAAAATATAGTATTTTCGAGTGTGGTTTCCATAGTTTTTAGGG  
CAAAATAGAACACAATTCGGTATAAAATCTTTATTTTGTCTTAGTTTATTTACTTTTAGATTTAG

AAATATTATTAACTTTCCCTTTTCGCTCTTAGTGAGTATGTTAATGGTATTTATGGTCTTTTAGTTAC  
TTTAATTTTTATAGCTATAATAACTATAGGATTTATATTTGAATTAGGTAAAAGCGCTCTTAAAATA  
GACAGCAGACAAAAATTATATATACCTAAATTGAACGTTAATTACCATACAGAGTATGTTGGAAT  
AGGTAAGGTTTCTAAGTAAAGTTATAGAGGCAGAAAACCAAAAAACCTACCAAAGGGTAGCTA  
ATGGGAAGCTATTAATAAATAAAGATGATAACCTATATATAGTATAGTTACTATATATTTACTATA  
ACTAGGATTATTATATATATATATATTATCTTATTGTATATTAAGATTATTATTATAAGGTATA  
ATTAATATAGTATCTTATTGTATAAGAATATAATATATTAACCTATAATTAATTTTATTTTTTAATTT  
TTAATTATAATTTTTTTTTTATATCTAGATGCTTACACATCTACAGATGTAGAAGAGAACAAAATAT  
TGTTGTTATAGTAGTGGATGATATAGAAAAATTTTTTATATTATTTATTTTTGTTAGGTAGCTTTT  
GAAGTGTTTGATAGAGAGGATATATGGACGGTAGGAGGGTATTCATTTTAATGAACAGTGGAATA  
GTTTAAATTAACCTAGTTATAGTTTATGAATTTAAATTATAATTATATTAATGTAGGTTATGATAGA  
ATTATGTATTGATCCTTAAGAGTTAAGAGAGATACGCCCACGTATAATACATATTGGTTTAGGGT  
TGAGTATATATACTTAAGAGTTAAGAATATATATATACAATATATAATAAATATAGTAATATATTA  
ATGGTATGGACTTAACCAGGTTTATATATTATCATTTGATAAACATTAATTATAATTTTTCTATTTA  
TTATTATTATTATACTGTGAGATTAATAATTATTAATAATATAATATTACATAGTACGTGATATTTGG  
GGATTTTATCTTATTAATTGGCAATTAATGATTCTAATCAAATTTTATTCTCTTTAGTTTAATGGTA  
GAACAATGATCTTCTAATTCATTGGTTTTAGTTTCGATTCTAAAAAGAGATGAGTAAATAATTTTCT  
AGATCAGAAATACTACTTTTAACTACAAAAGCTTACGCTTTTTAACATTTTTTTGATAAATAACA  
ACTATTGTTAATATTTGGCTGTCTATTGGTTTAACTAACAATTACAAAATTTTTTCAATTTTTATAAT  
ATAAATTTAAATGAGAATATTAATAAAGTCATTCAATTATTAATAATTAGTGAATTCTTACCTTATCGA  
TGCGTCACAACCAAGTAACATTAGTTACTTGTGAAATTTTGGTTCATTATTAGCTGTTTGTTAAT  
AGTACAAATTATTACCGGTATTACATTAGCTATGCATTATAGTCCTAGTGTAATGGAAGCTTTTAA  
CTCAATAGAGCATATAATGAGAGATGTTAATAACGGGTGATTAGTTCGTTATCTACATAGTAATA  
CAGCTTCTGCTTTCTTTTTCTTAGTGATTTACACATAGGAAGAGGTATATATTACGGATCATATA  
GAGCTCCTCGTACTTTAGTTTGAGCTATTGGTACTGTTATATTAATTAATGATGGCTATCGGTT  
TCCTAGGTTATGTTTTACCTTATGGACAGATGTCATTATGAGGTGCTACAGTTATTACTAATCTTA  
TTAGTGCTATACCTGAATAGGGCAAGATATTGTTGAATTCATTTGAGGTGGTTTTTCTGTTAATA  
ATGCCACTTTAAACAGATTTTTTGCAATTACATTTGTATTGCCTTTTGTATTAGCTGCTTTAGTTTTA  
ATGCACTTAATTGCACTTCATGATACTGCTGGTTCAAGCAATCCTCTTGGTGTTTCAGGTAATTAC  
GATAGAATTACATTTGCTCCATATTTTTATTTAAAGATTTAATTACTATTTTTATATTTATTTTTGTA  
TTAAGTGCTTTTGATTCTTTATGCCTAATGTTTTAGGGGATAGTGATAATTATATTATGGCTAATC  
CTATGCAAACCTCCTGCTGCTATTGTACCTGAATGATACTTATTACCTTTCTATGCTATTTTAAGATC  
TATACCTAATAAATTATTAGGTGTTATAGCGATGTTTAGTGCTATTTAGCTATTATGTTATTACCT  
GTTACAGATTTAGGTAGATCTAGAGGTTTACAATTTAGACCATTTAGTAAATAGCTTTCTGAGTT  
TTTGTTGCTAATTTCTTAGTTTAAATGCAATTAGGTGCTAAACACGTTGAAGATCCATTTATATTAT  
TAGGTCAATTAAGTACTGTATTATACTTTAGTTATTTTGTTGCTATATTACCTTTAGCTAGTTACTT  
AGATAATAGTTTAACTGATTTATCTAATAAATCTGAATTATTTTAAATAAACTAACTAAATATAT  
TAAGATTATTATTTAATATATTTTCTATTTAAGATACTATTAATTTAGTATTTTGGGTTTTAGTTTA  
TAATTTATATTATATTATGCATTACCCTCCACCTTGCTTTGTAGTAAGCTAATCTGTTATTTCTTTA  
GTTTAATGGTAGAACAAATGATCTTCTAATTCATTGGTTTTAGTTTGAATCTAAAAAGGAAATAAG  
AAATATATTCTTATTATTACTTATATAATAATTATTTCTTAAAAATATACATTTTGCAATTATAGCCGT  
TTAGCTGTATTAAATGTAAATGATATAAAATAGAATAAATATTTAAATTATTCCTATGTTATATT  
ATCCTATATTGCAACCATTATCAGAAGTTGTATTAATACTTGTACCTGCCTTATTAGCTGTAGCTT  
ATGTTACAGTTGCTGAAAGAAAACTATGGCTAGTATGCAAAGAAGATTAGGTCCTAATGCTGT

AGGTTACTATGGACTATTGCAAGCATTGCTGATGCCTTAAACCTTTTATTTAAAGAATATGTAG  
CTCCTACACAATCTAATATTGTTCTTTTCTTTTAGGTCCTGTAATAACTTTAATTTTGCATTATTA  
GGTTACGCTGTTATACCCTATGGTCCTGGTTCAGGGATAAGCGACATGAATTTAGGTATATTTTA  
CATGTTAGCTGTGTCATCTTTAGCTACATACGGTATTCTATTAGCTGGTTGAAGTGCGAATAGTA  
AATACGCTTTTCTAGGTTCTCTTAGAAGTACAGCTCAATTAATTAGTTATGAATTAATATTAAGTT  
CAGCTATATTAATAGTAATTATGATAACAGGAAATTTAAATTTAACTGTTTGTACTGAATCTCAAA  
GAGCTATTTGATTTATACTACCTTTATTTCTGTGTTTATAATATTTTTCATAGGATCTATAGCTGA  
GACAAATAGAGCTCCTTTTGATTTAGCCGAGGCTAACCTGCTAATCTGGTTTGGTCTGGTTATAT  
GTCACAAATTGCTAGGAAACCTTTTTATTTAAAAACAAAAGACAATTAGCAGGAAACTTAATTT  
AACCTAATTAATAATATTAGATAATTAACCTCTTCATAGACTAAACGTGACAATTTAATATATATA  
TATATTTATTTATATATATGATTAAATAAGATATAGTCAATCATCGGTGTGAATCGACTTAAAAAA  
AAAAGCACATGGGTAAACCCATCTCCCCTTATTAGGGGAATCAGAAGTTGTTAGTGGGTTTCAT  
GACAGAGCATGCTGCCGTAGTTTTCGTATTCTTCTTTTAGCTGAGTACGGTAGTATTGTACTAAT  
GTGTATTTTAACTAGTATATTATTTATTGGTGGTTACTTATTATTTGAAATATCCTATGTTTTACTG  
TGGTAAATTATATTTTCTTTGAATTATTTCTTTATAGACTGAGTAACATTTGTAGAGGTACAATCTTT  
ATACACTGATTTTTTAAATAATTCTATCATTGAAGGATTATTATATGGGTTTAACTAGGATTAAA  
AAGTTCTTAAATGATATTCACATTTATTTGAGCTAGAGCATCCTTCCCTAGAATACGATTTGATCA  
ACTAATGGGCTTCTGTTGAACAGTTTTATTACCTATTAATTTTGCAATTATTATATTAGTACCTTGT  
GTTTTATATAGTTTTAACTTATTACCTGTAAATATACCATTGTTCTAGCTCACACACCCGCCGCC  
CTACTGCCACAAGGCTACAGTACATATGAGGAGGGGAACTAAAGATCTAGAAGTATCCTAGTTA  
ATAATTACACTTAATAGTATACTAAATAGACCATCTATCATACTCGAGAATAGTGATAGTGTAAT  
TATACACTATTTTAACTGTATTCTACACTATTAGCATATTATTATCTTTATATGATAATAATTTTATA  
ACTTAATTTATTAGGTTACATTAACAAAAAATTCGTTAACTTTTTTCACCACTTTTAAATACAAAAT  
ACGAATTTTA

>YN643

ATAACAATTCTAAAGAACATAAAGAGTTATTAGATAAAAAATAATTCACCTATACAGTTAATAAAT  
CAACTTAAAGGGTATTTTTTCATAAATCCTTTATTAGCTTTAAGTTTAGCTATTACTATTTTCTCTTT  
TGCAGGTATTCCTCCTCTGTAGGGTTCTTTGCTAAACAGATGGTATTAAGCGCGGCTATTGATC  
AAGGTTATATCTTTTTATCTTTAGTTGCAATATTAAGTGTATAGGAGGGGTTTATTATTTAAA  
TATAATTAAGAAATGTTCTTTTATTCACCTGACTATAAATTAACGAAGAAATTAATAAATAC  
TATTAATGGTCAAATTATTAATAGAAACAATAAAATATTAATGTTGAATTTAATTATACAAATGT  
AGTTATGTCTAGTTCTGTGGCAATAACTATTTCTACTATTACATTAGTAGTTTTATTATTCATGTTT  
ATGAATAAAGAATGATTAAGTCTGGGTACTATATTGGTACAATCTTTATTTAGCTATTAATGAGTA  
GTATGACATTATTTATAGGGTTTGTATCTGTTATAGCTATTTTATTTTAGCCATTAATTTTATATTT  
GCTCCTCATAATCCTTATCAAGAAAAATATAGTATTTTCGAGTGTGGTTTCCATAGTTTTTTAGGG  
CAAAATAGAACACAATTCGGTATAAAATCTTTATTTTGCTTTAGTTTATTTACTTTTAGATTTAG  
AAATATTATTAACTTTCCCTTTCGCTCTTAGTGAGTATGTTAATGGTATTTATGGTCTTTTAGTTAC  
TTTAATTTTTATAGCTATAATAACTATAGGATTTATATTTGAATTAGGTAAAAGCGCTCTTAAATA  
GACAGCAGACAAAAATTATATATACCTAAATTGAACGTTAATTACCATACAGAGTATGTTGGAAT  
AGGTAAGGTTTCTAAGTAAAGTTATAGAGGCAGAAAACCAAAAAACCTACCAAAGGGTAGCTA  
ATGGGAAGCTATTAAAAATAAAGATGATAACCTATATATAGTATAGTTACTATATATTTACTATA  
ACTAGGATTATTATATATATATATATTATCTTATTGTATATTAAGATTATTATTATTATAAGGTATA  
ATTAATATAGTATCTTATTGTATAAGAATATAATATATTAACCTATAATTAATTTTATTTTAAATTT  
TTAATTATAATTTTTTTTTTATATCTAGATGCTTACACATCTACAGATGTAGAAGAGAACAAAATAT

TGTTGTTATAGTAGTGGATGATATAGAAAAATATTTTTATATTATTTATTTTTGTTAGGTAGCTTTT  
GAAGTGTGTTGATAGAGAGGATATATGGACGGTAGGAGGGTATTCATTTTAATGAACAGTGGATA  
GTTTAAATTAACCTAGTTATAGTTTATGAATTTAAATTATAATTATATTAATGTAGGTTATGATAGA  
ATTATGTATTGATCCTTAAGAGTTAAGAGAGATACGCCCACGTATAATACATATTGGTTTAGGGT  
TGAGTATATATACTTAAGAGTTAAGAATATATATATACAATATATAATAAATATAGTAATATATTA  
ATGGTATGGACTTAACCAGGTTTATATATTATCATTGATAAACATTAATTATAATTTTTCTATTTA  
TTATTATTATTATACTGTGAGATTAATAATTATTTAAATATAATATTACATAGTACGTGATATTTGG  
GGATTTTATCTTATTAATTGGCAATTAATGATTCTAATCAAATTTTATTCTCTTTAGTTTAATGGTA  
GAACAATGATCTTCTAATTCATTGGTTTTAGTTTCGATTCTAAAAAGAGATGAGTAAATAATTTTCT  
AGATCAGAAATACTACTTTTAACTACAAAAAGCTTACGCTTTTAAACATTTTTTTGATAAATAACA  
ACTATTGTTAATATTTGGCTGTCTATTGGTTTAACTACAATTACAAAATTTTTTCAATTTTTATAAT  
ATAAATTTAAATGAGAATATTTAAAAAGTCATTCATTATTTAAATTAGTGAATTCTTACCTTATCGA  
TGCGTCACAACCAAGTAACATTAGTTACTTGTGAAATTTTGGTTCATTATTAGCTGTTTGTTAAT  
AGTACAAATTATTACCGGTATTACATTAGCTATGCATTATAGTCCTAGTGAATGGAAGCTTTTAA  
CTCAATAGAGCATATAATGAGAGATGTTAATAACGGGTGATTAGTTCGTTATCTACATAGTAATA  
CAGCTTCTGCTTTCTTTTCTTAGTGATTACACATAGGAAGAGGTATATATTACGGATCATATA  
GAGCTCCTCGTACTTTAGTTTGAGCTATTGGTACTGTTATATTAATTAATGATGGCTATCGGTT  
TCCTAGGTTATGTTTTACCTTATGGACAGATGTCATTATGAGGTGCTACAGTTATTACTAATCTTA  
TTAGTGCTATACCTGAATAGGGCAAGATATTGTTGAATTCATTTGAGGTGGTTTTCTGTTAATA  
ATGCCACTTTAAACAGATTTTTTGCAATTACATTTGTATTGCCTTTGTATTAGCTGCTTTAGTTTA  
ATGCACTTAATTGCACTTCATGATACTGCTGGTTCAAGCAATCCTCTGGTGTTTCAGGTAATTAC  
GATAGAATTACATTTGCTCCATATTTTTATTTAAAGATTTAATTACTATTTTTATATTTATTTTTGTA  
TTAAGTGCTTTGTATTCTTTATGCCTAATGTTTTAGGGGATAGTGATAATTATATTATGGCTAATC  
CTATGCAAACCTCCTGCTGCTATTGTACCTGAATGATACTTATTACCTTTCTATGCTATTTTAAGATC  
TATACCTAATAAATTATTAGGTGTTATAGCGATGTTTAGTGCTATTTAGCTATTATGTTATTACCT  
GTTACAGATTTAGGTAGATCTAGAGGTTTACAATTTAGACCATTTAGTAAAATAGCTTTCTGAGTT  
TTTGTTGCTAATTTCTTAGTTTTAATGCAATTAGGTGCTAAACACGTTGAAGATCCATTTATATTAT  
TAGGTCAATTAAGTACTGTATTATACTTTAGTTATTTTGTTGCTATATTACCTTTAGCTAGTTACTT  
AGATAATAGTTTAACTGATTTATCTAATAAATCTGAATTATTTTAAATAAACTAACTAAATATAT  
TAAGATTATTATTTAATATATTTTCTATTTAAGATACTATTAATTTAGTATTTTGGGTTTTAGTTTA  
TAATTTATATTATATTATGCATTACCCTCCACCTTGCTTTGTAGTAAGCTAATCTGTTATTTCTTTA  
GTTTAATGGTAGAACAATGATCTTCTAATTCATTGGTTTTAGTTTGAATCTAAAAAGGAAATAAG  
AAATATATTCTTATTATTACTTATATAATAATTATTTCTTAAAAATATACATTTTGCAATTATAGCCGT  
TTAGCTGTATTAAATGTAAATGATATAAAATAGAATAAATATTTAAATTATTCCTATGTTATATT  
ATCCTATATTGCAACCATTATCAGAAGTTGTATTAATACTTGTACCTGCCTTATTAGCTGTAGCTT  
ATGTTACAGTTGCTGAAAGAAAAACTATGGCTAGTATGCAAAGAAGATTAGGTCCTAATGCTGT  
AGGTTACTATGGACTATTGCAAGCATTTGCTGATGCCTTAAACCTTTTATTAAGAATATGTAG  
CTCCTACACAATCTAATATTGTTCTTTTCTTTTAGGTCCTGTAATAACTTTAATTTTTGCATTATTA  
GGTTACGCTGTTATACCCTATGGTCCTGGTTCAGGATAAGCGACATGAATTTAGGTATATTTTA  
CATGTTAGCTGTGTCATCTTTAGCTACATACGGTATTCTATTAGCTGGTTGAAGTGCGAATAGTA  
AATACGCTTTTCTAGGTTCTCTTAGAAGTACAGCTCAATTAATTAGTTATGAATTAATTAAGTT  
CAGCTATATTAATAGTAATTATGATAACAGGAAATTTAAATTTAACTGTTTGTACTGAATCTCAAA  
GAGCTATTTGATTTATACTACCTTTATTTCTGTGTTTATAATATTTTTCATAGGATCTATAGCTGA  
GACAAATAGAGCTCCTTTTGATTTAGCCGAGGCTAACCTGCTAATCTGGTTTGGTCTGGTTATAT

GTCACAAATTGCTAGGAAACCTTTTTATTTTAAAAACAAAAGACAATTAGCAGGAACTTAATTT  
AACCTAATTAATAATATTAGATAATTAACCTCTTCATAGACTAAACGTGACAATTTAATATATATA  
TATATTTATTTATATATATGATTAAATAAGATATAGTCAATCATCGGTGTGAATCGACTTAAAAAA  
AAAAGCACATGGGTAAACCCATCTCCCCTTATTAGGGGAATCAGAACTTGTTAGTGGGTTTCAT  
GACAGAGCATGCTGCCGTAGTTTTCGTATTCTTCTTTTAGCTGAGTACGGTAGTATTGTACTAAT  
GTGTATTTTAACTAGTATATTATTTATTGGTGGTTACTTATTATTTGAAATATCCTATGTTTTACTG  
TGGTAAATTATATTTTCTTTGAATTATTCTTTATAGACTGAGTAACATTTGTAGAGGTACAATCTTT  
ATACACTGATTTTTTAAATAATTCTATCATTGAAGGATTATTATATGGGTTTAATCTAGGATTAAA  
AAGTTCTTTAATGATATTCACATTTATTTGAGCTAGAGCATCCTTCCCTAGAATACGATTTGATCA  
ACTAATGGGCTTCTGTTGAACAGTTTTATTACCTATTAATTTTGCAATTATTATATTAGTACCTTGT  
GTTTTATATAGTTTTAACTTATTACCTGTAAATATACCATTGTTCTAGCTCACACACCCGCCGCC  
CTACTGCCACAAGGCTACAGTACATATGAGGAGGGGAACCTAAAGATCTAGAACTATCCTAGTTA  
ATAATTACACTTAATAGTATACTAAATAGACCATCTATCATACTCGAGAATAGTGATAGTGTAAT  
TATACACTATTTTAACTGTATTCTACACTATTAGCATATTATTATCTTTATATGATAATAATTTTATA  
ACTTAATTTATTAGGTTACATTAACAAAAAATTCGTTAACTTTTTTCACCACTTTTTAATACAAAAT  
ACGAATTTTA

>YN651

ATAACAATTCTAAAGAACATAAAGAGTTATTAGATAAAAAATAATTCACCTATACAGTTAATAAAT  
CAACTTAAAGGGTATTTTTTCATAAATCCTTTATTAGCTTTAAGTTAGCTATTACTATTTTCTCTTT  
TGCAGGTATTCCTCCTCTTGTAGGGTCTTTGCTAAACAGATGGTATTAAGCGCGGCTATTGATC  
AAGGTTATATCTTTTTATCTTTAGTTGCAATATTAAGTGTATAGGAGGGGTTTATTATTTAAA  
TATAATTAAGAAATGTTCTTTTATTCACCTGACTATAAATTAACGAAGAAATTAATAAATAC  
TATTAATGGTCAAATTATTAATAGAAACAATAAAATATTAATGTTGAATTTAATTATACAAATGT  
AGTTATGTCTAGTTCTGTGGCAATAACTATTTCTACTATTACATTAGTAGTTTTATTATTCATGTTT  
ATGAATAAAGAATGATTAAGTCTGGGTACTATATTGGTACAATCTTTATTTAGCTATTAATGAGTA  
GTATGACATTATTTATAGGGTTTGTATCTGTTATAGCTATTTTATTTTAGCCATTAATTTATATTT  
GCTCCTCATAATCCTTATCAAGAAAAATATAGTATTTTCGAGTGTGGTTTCCATAGTTTTTTAGGG  
CAAAATAGAACACAATTCGGTATAAAATCTTTATTTTGCTTTAGTTTATTTACTTTTAGATTTAG  
AAATATTATTAACCTTCCCTTTCGCTCTTAGTGAGTATGTTAATGGTATTTATGGTCTTTTAGTTAC  
TTTAATTTTTATAGCTATAATAACTATAGGATTTATATTTGAATTAGGTAAAAGCGCTCTTAAATA  
GACAGCAGACAAAAATTATATACCTAAATTGAACGTTAATTACCATACAGAGTATGTTGGAAT  
AGGTAAGGTTTCTAAGTAAAGTTATAGAGGCAGAAAACCAAAAAACCTACCAAAGGGTAGCTA  
ATGGGAAGCTATTAATAAAGATGATAACCTATATATAGTATAGTTACTATATATTTACTATA  
ACTAGGATTATTATATATATATATATTATCTTATTGTATATTAAGATTATTATTATAAGGTATA  
ATTAATATAGTATCTTATTGTATAAGAATATAATATATTAACCTATAATTAATTTATTTTTAATTT  
TTAATTATAATTTTTTTTTATATCTAGATGCTTACACATCTACAGATGTAGAAGAGAACAAAATAT  
TGTTGTTATAGTAGTGATATAGAAAAATATTTTATATTATTTATTTTGTAGGTAGCTTTT  
GAAGTGTGATAGAGAGGATATATGGACGGTAGGAGGTATTCATTTAATGAACAGTGGATA  
GTTTAAATTAACCTAGTTATAGTTTATGAATTTAAATTATAATTATATTAATGTAGGTTATGATAGA  
ATTATGTATTGATCCTTAAGAGTTAAGAGAGATACGCCACGTATAATACATATTGGTTAGGGT  
TGAGTATATATACTTAAGAGTTAAGAATATATATATACAATATATAATAAATATAGTAATATATTA  
ATGGTATGGACTTAACCAGGTTTATATATTATCATTTGATAAACATTAATTATAATTTTTCTATTTA  
TTATTATTATACTGTGAGATTAATAATTATTAATAATATTACATAGTACGTGATATTTGG  
GGATTTTATCTTATTAATTGGCAATTAATGATTCTAATCAAATTTTATTCTCTTAGTTTAATGGTA

GAACAATGATCTTCTAATTCATTGGTTTTAGTTTCGATTCTAAAAAGAGATGAGTAAATAATTTTCT  
AGATCAGAAATACTACTTTTAACTACAAAAAGCTTACGCTTTTAAACATTTTTTGATAAATAACA  
ACTATTGTTAATATTTGGCTGTCTATTGGTTTAACTAACAATTACAAAATTTTTCAATTTTTATAAT  
ATAAATTTAAATGAGAATATTA AAAAGTCATTATTATTA AAAATTAGTGAATTCTTACCTTATCGA  
TGCGTCACAACCAAGTAACATTAGTTACTTGTGAAATTTTGGTTCATTATTAGCTGTTTGTTAAT  
AGTACAAATTATTACCGGTATTACATTAGCTATGCATTATAGTCCTAGTGAATGGAAGCTTTTAA  
CTCAATAGAGCATATAATGAGAGATGTTAATAACGGGTGATTAGTTCGTTATCTACATAGTAATA  
CAGCTTCTGCTTTCTTTTTCTTAGTGATTTACACATAGGAAGAGGTATATATTACGGATCATATA  
GAGCTCCTCGTACTTTAGTTTGAGCTATTGGTACTGTTATATTAATTAATGATGGCTATCGGT  
TCCTAGGTTATGTTTTACCTTATGGACAGATGTCATTATGAGGTGCTACAGTTATTACTAATCTTA  
TTAGTGCTATACCTGAATAGGGCAAGATATTGTTGAATTCATTTGAGGTGGTTTTCTGTTAATA  
ATGCCACTTTAAACAGATTTTTGCATTACATTTGTATTGCCTTTGTATTAGCTGCTTTAGTTTTA  
ATGCACTTAATTGCACTTCATGATACTGCTGGTTCAAGCAATCCTCTTGGTGTTTCAGGTAATTAC  
GATAGAATTACATTTGCTCCATATTTTTATTTAAAGATTTAATTACTATTTTTATTTATTTTTGTA  
TTAAGTGCTTTTGATTCTTTATGCCTAATGTTTTAGGGGATAGTGATAATTATATTATGGCTAATC  
CTATGCAAACCTCTGCTGCTATTGTACCTGAATGATACTTATTACCTTTCTATGCTATTTTAAGATC  
TATACCTAATAAATTATTAGGTGTTATAGCGATGTTTAGTGCTATTTAGCTATTATGTTATTACCT  
GTTACAGATTTAGGTAGATCTAGAGGTTTACAATTTAGACCATTTAGTAAAATAGCTTTCTGAGTT  
TTTGTTGCTAATTTCTTAGTTTTAATGCAATTAGGTGCTAAACACGTTGAAGATCCATTTATATTAT  
TAGGTCAATTAAGTACTGTATTATACTTTAGTTATTTTTGTTGCTATATTACCTTTAGCTAGTTACTT  
AGATAATAGTTTAACTGATTTATCTAATAAATCTGAATTATTTTAAATAAACTAACTAAATATAT  
TAAGATTATTATTTAATATATTTTCTATTTAAGATACTATTAATTTAGTATTTTGGGTTTTCAGTTTA  
TAATTTATATTATATTATGCATTACCTCCACCTTGCTTTGTAGTAAGCTAATCTGTTATTTCTTTA  
GTTTAATGGTAGAACAATGATCTTCTAATTCATTGGTTTTAGTTTCGAATCTAAAAAGGAAATAAG  
AAATATATTCTTATTATTACTTATATAATAATTATTTCTTAAAAATATACATTTTGCATTATAGCCGT  
TTAGCTGTATTA AAAATGTAAAATGATATAAAATAGAATAAATATTTAAATTATTCCTATGTTATATT  
ATCCTATATTGCAACCATTATCAGAAGTTGTATTAATACTTGTACCTGCCTTATTAGCTGTAGCTT  
ATGTTACAGTTGCTGAAAGAAAACTATGGCTAGTATGCAAAGAAGATTAGGTCCTAATGCTGT  
AGGTTACTATGGACTATTGCAAGCATTTGCTGATGCCTTAAACTTTTATTAAGAATATGTAG  
CTCCTACACAATCTAATATTGTTCTTTCTTTTAGGTCCTGTAATAACTTTAATTTTTGCATTATTA  
GGTTACGCTGTTATACCCTATGGTCCTGGTTCAGGGATAAGCGACATGAATTTAGGTATATTTTA  
CATGTTAGCTGTGTCATCTTTAGCTACATACGGTATTCTATTAGCTGGTTGAAGTGCGAATAGTA  
AATACGCTTTTCTAGGTTCTCTTAGAAGTACAGCTCAATTAATTAGTTATGAATTAATTAAGTT  
CAGCTATATTAATAGTAATTATGATAACAGGAAATTTAAATTTAACTGTTTGTACTGAATCTCAAA  
GAGCTATTTGATTTATACTACCTTTATTTCTGTGTTATAATATTTTTCATAGGATCTATAGCTGA  
GACAAATAGAGCTCCTTTTGATTTAGCCGAGGCTAACCTGCTAATCTGGTTTGGTCTGGTTATAT  
GTCACAAATTGCTAGGAAACCTTTTTATTTTAAAAACAAAAGACAATTAGCAGGAAACTTAATTT  
AACCTAATTA AAAATATTAGATAATTAACTCTTCATAGACTAAACGTGACAATTTAATATATATA  
TATATTTATTTATATATATGATTAAATAAGATATAGTCAATCATCGGTGTGAATCGACTTAAAAAA  
AAAAGCACATGGGTAAACCCATCTCCCCTATTAGGGGAATCAGAACTTGTTAGTGGGTTTCAT  
GACAGAGCATGCTGCCGTAGTTTTCGTATTCTTCTTTTAGCTGAGTACGGTAGTATTGTACTAAT  
GTGTATTTTAACTAGTATATTATTTATTGGTGGTTACTTATTATTTGAAATATCCTATGTTTTTACTG  
TGGTAAATTATATTTCTTTGAATTATTCTTTATAGACTGAGTAACATTTGTAGAGGTACAATCTTT  
ATACACTGATTTTTTAAATAATTCTATCATTGAAGGATTATTATATGGGTTAATCTAGGATTA

AAGTTCTTTAATGATATTCACATTTATTTGAGCTAGAGCATCCTTCCCTAGAATACGATTTGATCA  
ACTAATGGGCTTCTGTTGAACAGTTTTATTACCTATTAATTTTGCAATTATTATATTAGTACCTTGT  
GTTTTATATAGTTTTAACTTATTACCTGTAAATATACCATTGTTCTAGCTCACACACCCGCCGCC  
CTACTGCCACAAGGCTACAGTACATATGAGGAGGGGAAGTAAAGATCTAGAACTATCCTAGTTA  
ATAATTACACTTAATAGTATACTAAATAGACCATCTATCATACTCGAGAATAGTGATAGTGTAAT  
TATACACTATTTTAACTGTATTCTACACTATTAGCATATTATTATCTTTATATGATAATAATTTTATA  
ACTTAATTTATTAGGTTACATTAACAAAAAATTCGTTAACTTTTTTCACCACTTTTAAATACAAAAT  
ACGAATTTTA

>YN657

ATAACAATTCTAAAGAACATAAAGAGTTATTAGATAAAAAATAATTCACCTATACAGTTAATAAAT  
CAACTTAAAGGGTATTTTTTCATAAATCCTTTATTAGCTTTAAGTTTAGCTATTACTATTTCTCTTT  
TGCAGGTATTCTCCTCTTGTAGGGTCTTTGCTAAACAGATGGTATTAAGCGCGGCTATTGATC  
AAGGTTATATCTTTTTATCTTTAGTTGCAATATTAAGTGTATAGGAGGGGTTTATTATTTAAA  
TATAATTAAGAAATGTTCTTTTATTCACCTGACTATAAATTAACGAAGAAATTAATAAATAC  
TATTAATGGTCAAATTATTAATAGAAACAATAAATATTAATGTTGAATTTAATTATACAAATGT  
AGTTATGTCTAGTTCTGTGGCAATAACTATTTCTACTATTACATTAGTAGTTTTATTATTCATGTTT  
ATGAATAAAGAATGATTAAGTCTGGGTACTATATTGGTACAATCTTTATTTAGCTATTAATGAGTA  
GTATGACATTATTTATAGGGTTGTATCTGTTATAGCTATTTTATTTTAGCCATTAATTTTATATTT  
GCTCCTCATAATCCTTATCAAGAAAAATATAGTATTTTCGAGTGTGGTTTCCATAGTTTTTTAGGG  
CAAAATAGAACACAATTCGGTATAAAATTCCTTTATTTTGTCTTAGTTTATTTACTTTTAGATTTAG  
AAATATTATTAACTTTCCCTTCGCTCTTAGTGAGTATGTTAATGGTATTTATGGTCTTTTAGTTAC  
TTTAATTTTTATAGCTATAATAACTATAGGATTTATATTTGAATTAGGTAAGCGCTCTTAAATA  
GACAGCAGACAAAAATTATATATACCTAAATTGAACGTTAATTACCATACAGAGTATGTTGGAAT  
AGGTAAGGTTTCTAAGTAAAGTTATAGAGGCAGAAAACCAAAAAACCTACCAAAGGGTAGCTA  
ATGGGAAGCTATTAATAAATAAAGATGATAACCTATATATAGTATAGTTACTATATATTTACTATA  
ACTAGGATTATTATATATATATATATTATCTTATTGTATATTAAGATTATTATTATAAGGTATA  
ATTAATATAGTATCTTATTGTATAAGAATATAATATATTAACCTATAATTAATTTTATTTTTTAATTT  
TTAATTATAATTTTTTTTTATATCTAGATGCTTACACATCTACAGATGTAGAAGAGAACAAAATAT  
TGTTGTTATAGTAGTGGATGATATAGAAAAATATTTTTATATTATTTATTTTGTAGGTAGCTTTT  
GAAGTGTGTTGATAGAGAGGATATATGGACGGTAGGAGGGTATTCATTTAATGAACAGTGGATA  
GTTTAAATTAACCTAGTTATAGTTTATGAATTTAAATTATAATTATATTAATGTAGGTTATGATAGA  
ATTATGTATTGATCCTTAAGAGTTAAGAGAGATACGCCACGTATAATACATATTGGTTTAGGGT  
TGAGTATATATACTTAAGAGTTAAGAATATATATATACAATATATAATAAATATAGTAATATATTA  
ATGGTATGGACTTAACCAGGTTTATATATTATCATTTGATAAACATTAATTATAATTTTTCTATTTA  
TTATTATTATTATACTGTGAGATTAATAATTATTAATAATATAATATTACATAGTACGTGATATTTGG  
GGATTTTATCTTATTAATTGGCAATTAATGATTCTAATCAAATTTTATTCTCTTAGTTAATGGTA  
GAACAATGATCTTCTAATTCATTGGTTTTAGTTTCGATTCTAAAAAGAGATGAGTAAATAATTTTCT  
AGATCAGAAATACTACTTTTAACTACAAAAGCTTACGCTTTTAAACATTTTTTGTAAATAACA  
ACTATTGTTAATATTTGGCTGTCTATTGGTTTAACTAACAATTACAAAATTTTTCAATTTTTATAAT  
ATAAATTTAAATGAGAATATTAATAAAGTCATTATTATTAATAAATTAGTGAATCTTACCTTATCGA  
TGCGTCACAACCAAGTAACATTAGTTACTTGTGAAATTTTGGTTCATTATTAGCTGTTTGTAAAT  
AGTACAAATTATTACCGGTATTACATTAGCTATGCATTATAGTCCTAGTGTAATGGAAGCTTTTAA  
CTCAATAGAGCATATAATGAGAGATGTTAATAACGGGTGATTAGTTCGTTATCTACATAGTAATA  
CAGCTTCTGCTTTCTTTTCTTAGTGTATTTACACATAGGAAGAGGTATATATTACGGATCATATA

GAGCTCCTCGTACTTTAGTTTGAGCTATTGGTACTGTTATATTAATATTAATGATGGCTATCGGTT  
TCCTAGGTTATGTTTTACCTTATGGACAGATGTCATTATGAGGTGCTACAGTTATTACTAATCTTA  
TTAGTGCTATACCTGAATAGGGCAAGATATTGTTGAATTCATTTGAGGTGGTTTTCTGTAAATA  
ATGCCACTTTAAACAGATTTTTGCATTACATTTGTATTGCCTTTGTATTAGCTGCTTTAGTTTTA  
ATGCACTTAATTGCACTTCATGATACTGCTGGTTCAAGCAATCCTCTTGGTGTTCAGGTAATTAC  
GATAGAATTACATTTGCTCCATATTTTTATTTAAAGATTTAATTACTATTTTTATATTTATTTTGTA  
TTAAGTGCTTTTGTATTCTTTATGCCTAATGTTTTAGGGGATAGTGATAATTATATTATGGCTAATC  
CTATGCAAACCTCCTGCTGCTATTGTACCTGAATGATACTTATTACCTTTCTATGCTATTTAAGATC  
TATACCTAATAAATTATTAGGTGTTATAGCGATGTTTAGTGCTATTTTAGCTATTATGTTATTACCT  
GTTACAGATTTAGGTAGATCTAGAGGTTTACAATTTAGACCATTTAGTAAAATAGCTTTCTGAGTT  
TTTGTTGCTAATTTCTTAGTTTTAATGCAATTAGGTGCTAAACACGTTGAAGATCCATTTATATTAT  
TAGGTCAATTAAGTACTGTATTATACTTTAGTTATTTTGTGCTATATTACCTTTAGCTAGTTACTT  
AGATAATAGTTTAACTGATTTATCTAATAAATCTGAATTATTTTAAATAAAACTAACTAAATATAT  
TAAGATTATTATTTAATATATTTTCTATTTAAGATACTATTAATTTAGTATTTTGGGTTTTCAGTTTA  
TAATTTATATTATATTATGCATTACCCTCCACCTTGCTTTGTAGTAAGCTAATCTGTTATTTCTTTA  
GTTAATGGTAGAACAATGATCTTCTAATTCATTGGTTTTAGTTCGAATCTAAAAAGGAAATAAG  
AAATATATTCTTATTATTACTTATATAATAATTATTTCTTAAAAATATACATTTTGCATTATAGCCGT  
TTAGCTGTATTAATAATGTAAATGATATAAAATAGAATAAATATTTAAATTATTCCTATGTTATATT  
ATCCTATATTGCAACCATTATCAGAAGTTGTATTAATACTTGTACCTGCCTTATTAGCTGTAGCTT  
ATGTTACAGTTGCTGAAAGAAAAACTATGGCTAGTATGCAAAGAAGATTAGGTCCTAATGCTGT  
AGGTTACTATGGACTATTGCAAGCATTTGCTGATGCCTTAAACCTTTTATTTAAAGAATATGTAG  
CTCCTACACAATCTAATATTGTTCTTTTCTTTTAGGTCCTGTAATAACTTTAATTTTGCATTATTA  
GGTTACGCTGTTATACCCTATGGTCCTGGTTCAGGGATAAGCGACATGAATTTAGGTATATTTA  
CATGTTAGCTGTGTCATCTTTAGCTACATACGGTATTCTATTAGCTGGTTGAAGTGCGAATAGTA  
AATACGCTTTTCTAGGTTCTCTTAGAAGTACAGCTCAATTAATTAGTTATGAATTAATATTAAGTT  
CAGCTATATTAATAGTAATTATGATAACAGGAAATTTAAATTTAACTGTTTGTACTGAATCTCAAA  
GAGCTATTTGATTTATACTACCTTTATTTCTGTGTTTATAATTTTTTCATAGGATCTATAGCTGA  
GACAAATAGAGCTCCTTTTGATTTAGCCGAGGCTAACCTGCTAATCTGGTTTGGTCTGGTTATAT  
GTCACAAATTGCTAGGAAACCTTTTTATTTAAAAACAAAAGACAATTAGCAGGAACTTAATTT  
AACCTAATTAATAATATTAGATAATTAACTCTTCATAGACTAAACGTGACAATTTAATATATATA  
TATATTTATTTATATATATGATTAATAAGATATAGTCAATCATCGGTGTGAATCGACTTAAAAAA  
AAAAGCACATGGGTAAACCCATCTCCCCTTATTAGGGGAATCAGAACTTGTTAGTGGGTTTCAT  
GACAGAGCATGCTGCCGTAGTTTTCGTATTCTTCTTTTAGCTGAGTACGGTAGTATTGTACTAAT  
GTGTATTTTAACTAGTATATTATTTATTGGTGGTTACTTATTATTTGAAATATCCTATGTTTTACTG  
TGGTAAATTATATTTCTTTGAATTATTCTTTATAGACTGAGTAACATTTGTAGAGGTACAATCTTT  
ATACACTGATTTTTTAAATAATTCTATCATTGAAGGATTATTATATGGGTTTAACTAGGATTA  
AAGTTCTTTAATGATATTCACATTTATTTGAGCTAGAGCATCCTTCCCTAGAATACGATTTGATCA  
ACTAATGGGCTTCTGTTGAACAGTTTTATTACCTATTAATTTTGCAATTATTATATTAGTACCTTGT  
GTTTTATATAGTTTTAACTTATTACCTGTAAATATACCATTGTTCTAGCTCACACACCCGCCGCC  
CTACTGCCACAAGGCTACAGTACATATGAGGAGGGGAACTAAAGATCTAGAACTATCCTAGTTA  
ATAATTACACTTAATAGTATACTAAATAGACCATCTATCATACTCGAGAATAGTGATAGTGTAAT  
TATACACTATTTTAACTGTATTCTACACTATTAGCATATTATTATCTTTATATGATAATAATTTTATA  
ACTTAATTTATTAGGTTACATTAACAAAAAATTCGTTAACTTTTTTCACCACTTTTAAATACAAAAT  
ACGAATATTA

>YN661

ATAACAATTCTAAAGAACATAAAGAGTTATTAGATAAAAAATAATTCACCTATACAGTTAATAAAT  
CAACTTAAAGGGTATTTTTTCATAAATCCTTTATTAGCTTTAAGTTTAGCTATTACTATTTCTCTTT  
TGCAGGTATTCCTCCTCTTG TAGGGTCTTTGCTAAACAGATGGTATTAAGCGCGGCTATTGATC  
AAGGTTATATCTTTTTATCTTTAGTTGCAATATTAAGTAGTGTTATAGGAGGGGTTTATTATTTAAA  
TATAATTAAGAAATGTTCTTTTATTCACCTGACTATAAATTAACGAAGAAATTAATAAATAATAC  
TATTAATGGTCAAATTATTAATAGAAACAATAAAATATTAATGTTGAATTTAATTATACAAATGT  
AGTTATGTCTAGTTCTGTGGCAATAACTATTTCTACTATTACATTAGTAGTTTTATTATTCATGTTT  
ATGAATAAAGAATGATTAAGTCTGGGTACTATATTGGTACAATCTTTATTTAGCTATTAATGAGTA  
GTATGACATTATTTATAGGGTTTGTATCTGTTATAGCTATTTTATTTTAGCCATTAATTTATATTT  
GCTCCTCATAATCCTTATCAAGAAAAATATAGTATTTTCGAGTGTGGTTTCCATAGTTTTTTAGGG  
CAAAATAGAACACAATTCGGTATAAAATTCTTTATTTTGTCTTAGTTTATTTACTTTTAGATTTAG  
AAATATTATTAACTTTCCCTTTGCTCTTAGTGAGTATGTTAATGGTATTTATGGTCTTTTAGTTAC  
TTTAATTTTTATAGCTATAATAACTATAGGATTTATATTTGAATTAGGTAAAAGCGCTCTTAAATA  
GACAGCAGACAAAAATTATATATACCTAAATTGAACGTTAATTACCATACAGAGTATGTTGGAAT  
AGGTAAGGTTTCTAAGTAAAGTTATAGAGGCAGAAAACCAAAAACCTACCAAAGGGTAGCTA  
ATGGGAAGCTATTAATAAATAAAGATGATAACCTATATATAGTATAGTTACTATATATTTACTATA  
ACTAGGATTATTATATATATATATATTATCTTATTGTATATTAAGATTATTATTATTATAAGGTATA  
ATTAATATAGTATCTTATTGTATAAGAATATAATATATTAACCTATAATTAATTTTATTTTTAATTT  
TTAATTATAATTTTTTTTTATATCTAGATGCTTACACATCTACAGATGTAGAAGAGAACAAAATAT  
TGTTGTTATAGTAGTGATATAGAAAAATATTTTTATATTATTTATTTTGTAGGTAGCTTTT  
GAAGTGTTTGATAGAGAGGATATATGGACGGTAGGAGGGTATTCATTTTAATGAACAGTGGATA  
GTTTAAATTAACCTAGTTATAGTTTATGAATTTAAATTATAATTATATTAATGTAGGTTATGATAGA  
ATTATGTATTGATCCTTAAGAGTTAAGAGAGATACGCCACGTATAATACATATTGGTTTAGGGT  
TGAGTATATATACTTAAGAGTTAAGAATATATATATACAATATATAATAAATATAGTAATATATTA  
ATGGTATGGACTTAACCAGGTTTATATATTATCATTGATAAACATTAATTATAATTTTTCTATTTA  
TTATTATTATTATACTGTGAGATTAATAATTATTAATAATATAATATTACATAGTACGTGATATTTGG  
GGATTTTATCTTATTAATTGGCAATTAATGATTCTAATCAAATTTTATTCTCTTAGTTTAATGGTA  
GAACAATGATCTTCTAATTCATTGGTTTTAGTTGATTCTAAAAAGAGATGAGTAAATAATTTTCT  
AGATCAGAAATACTACTTTTAACTACAAAAGCTTACGCTTTTAAACATTTTTTGATAAATAACA  
ACTATTGTTAATATTTGGCTGTCTATTGGTTTAACTACAATTACAAAATTTTTCAATTTTTATAAT  
ATAAATTTAAATGAGAATATTAATAAAGTCATTCAATTATTAATAAATTAGTGAATTCTACCTTATCGA  
TGCCTCACAACCAAGTAACATTAGTTACTTGTGAAATTTTGGTTCATTATTAGCTGTTTGTAAAT  
AGTACAAATTATTACCGGTATTACATTAGCTATGCATTATAGTCCTAGTGAATGGAAGCTTTTAA  
CTCAATAGAGCATATAATGAGAGATGTTAATAACGGGTGATTAGTTCGTTATCTACATAGTAATA  
CAGCTTCTGCTTTCTTTTCTTAGTGATTTACACATAGGAAGAGGTATATATTACGGATCATATA  
GAGCTCCTCGTACTTTAGTTTGAGCTATTGGTACTGTTATATTAATTAATGATGGCTATCGGTT  
TCCTAGGTTATGTTTTACCTTATGGACAGATGTCATTATGAGGTGCTACAGTTATTACTAATCTTA  
TTAGTGCTATACCTGAATAGGGCAAGATATTGTTGAATTCATTTGAGGTGGTTTTTCTGTAAATA  
ATGCCACTTTAAACAGATTTTTTGCAATTACATTTTGATTGCCTTTTGATTAGCTGCTTTAGTTTA  
ATGCACTTAATTGCACTTCATGATACTGCTGGTTCAAGCAATCCTCTTGGTGTTTCAGGTAATTAC  
GATAGAATTACATTTGCTCCATATTTTTATTTAAAGATTTAATTACTATTTTTATATTTATTTTGT  
TTAAGTGCTTTTGATTCTTTATGCCTAATGTTTTAGGGGATAGTGATAATTATATTATGGCTAATC  
CTATGCAAACCTCCTGCTGCTATTGTACCTGAATGATACTTATTACCTTTCTATGCTATTTTAAGATC

TATACCTAATAAATTATTAGGTGTTATAGCGATGTTTAGTGCTATTTTAGCTATTATGTTATTACCT  
GTTACAGATTTAGGTAGATCTAGAGGTTTACAATTTAGACCATTTAGTAAAATAGCTTTCTGAGTT  
TTTGTTGCTAATTTCTTAGTTTTAATGCAATTAGGTGCTAAACACGTTGAAGATCCATTTATATTAT  
TAGGTCAATTAAGTACTGTATTATACTTTAGTTATTTTGTGCTATATTACCTTTAGCTAGTTACTT  
AGATAATAGTTTAACTGATTTATCTAATAAATCTGAATTATTTTAAATAAACTAACTAAATATAT  
TAAGATTATTATTTAATATATTTTCTATTTAAGATACTATTAATTTAGTATTTTGGGTTTTAGTTTA  
TAATTTATATTATATTATGCATTACCCTCCACCTTGCTTTGTAGTAAGCTAATCTGTTATTTCTTTA  
GTTTAATGGTAGAACAATGATCTTCTAATTCATTGGTTTTAGTTCGAATCTAAAAAGGAAATAAG  
AAATATATTCTTATTATTACTTATATAATAATTATTTCTTAAAAATATACATTTTGCATTATAGCCGT  
TTAGCTGTATTTAAATGTAAATGATATAAAATAGAATAAATATTTAAATTATTCCTATGTTATATT  
ATCCTATATTGCAACCATTATCAGAAGTTGTATTAATACTTGTACCTGCCTTATTAGCTGTAGCTT  
ATGTTACAGTTGCTGAAAGAAAACTATGGCTAGTATGCAAAGAAGATTAGGTCCTAATGCTGT  
AGGTTACTATGGACTATTGCAAGCATTTGCTGATGCCTTAAACTTTTTATTAAAGAATATGTAG  
CTCCTACACAATCTAATATTGTTCTTTTCTTTTAGGTCCTGTAATAACTTTAATTTTTGCATTATTA  
GGTTACGCTGTTATACCCTATGGTCCTGGTTCAGGGATAAGCGACATGAATTTAGGTATATTTTA  
CATGTTAGCTGTGTCATCTTTAGCTACATACGGTATTCTATTAGCTGGTTGAAGTGCGAATAGTA  
AATACGCTTTTCTAGGTTCTCTTAGAAGTACAGCTCAATTAATTAGTTATGAATTAATATTAAGTT  
CAGCTATATTAATAGTAATTATGATAACAGGAAATTTAAATTTAACTGTTTGTACTGAATCTCAAA  
GAGCTATTTGATTTATACTACCTTTATTTCTGTGTTTATAATATTTTTCATAGGATCTATAGCTGA  
GACAAATAGAGCTCCTTTTGATTTAGCCGAGGCTAACCTGCTAATCTGGTTTGGTCTGGTTATAT  
GTCACAAATTGCTAGGAAACCTTTTTATTTAAAAACAAAAGACAATTAGCAGGAACTTAATTT  
AACCTAATTAATAATATTAGATAATTAACTCTTCATAGACTAAACGTGACAATTTAATATATATA  
TATATTTATTTATATATATGATTAAATAAGATATAGTCAATCATCGGTGTGAATCGACTTAAAAAA  
AAAAGCACATGGGTAAACCCATCTCCCCTTATTAGGGGAATCAGAACTTGTTAGTGGGTTTCAT  
GACAGAGCATGCTGCCGTAGTTTTCGTATTCTTCTTTTAGCTGAGTACGGTAGTATTGTACTAAT  
GTGTATTTTAACTAGTATATTATTTATTGGTGGTTACTTATTATTTGAAATATCCTATGTTTTACTG  
TGGTAAATTATATTTTCTTTGAATTATTCTTTATAGACTGAGTAACATTTGTAGAGGTACAATCTTT  
ATACACTGATTTTTTAAATAATTCTATCATTGAAGGATTATTATATGGGTTTAACTAGGATTAAA  
AAGTTCTTTAATGATATTCACATTTATTTGAGCTAGAGCATCCTTCCCTAGAATACGATTTGATCA  
ACTAATGGGCTTCTGTTGAACAGTTTTATTACCTATTAATTTTGCAATTATTATATTAGTACCTTGT  
GTTTTATATAGTTTTAACTTATTACCTGTAAATATACCATTGTTCTAGCTCACACACCCGCCGCC  
CTACTGCCACAAGGCTACAGTACATATGAGGAGGGGAATAAGATCTAGAATACTATCCTAGTTA  
ATAATTACACTTAATAGTATACTAAATAGACCATCTATCATACTCGAGAATAGTGATAGTGTAAT  
TATACACTATTTTAACTGTATTCTACACTATTAGCATATTATTATCTTTATATGATAATAATTTTATA  
ACTTAATTTATTAGGTTACATTAACAAAAAATTCGTTAACTTTTTTCACCACTTTTAAATACAAAAAT  
ACGAATTTTA

>YN670

ATAACAATTCTAAAGAACATAAAGAGTTATTAGATAAAAAATAATTCACCTATACAGTTAATAAAT  
CAACTTAAAGGGTATTTTTTCATAAATCCTTTATTAGCTTTAAGTTTAGCTATTACTATTTTCTCTTT  
TGCAGGTATTCCTCCTCTGTAGGGTTCTTTGCTAAACAGATGGTATTAAGCGCGGCTATTGATC  
AAGGTTATATCTTTTATCTTTAGTTGCAATATTAAGTGTATAGGAGGGGTTTATTATTTAAA  
TATAATTAAGAAATGTTCTTTTATTCACCTGACTATAAATTAACGAAGAAATTAATAAATAC  
TATTAATGGTCAAATTATTAATAGAAACAATAAAATATTAATGTTGAATTTAATTATACAAATGT  
AGTTATGTCTAGTTCTGTGGCAATAACTATTTCTACTATTACATTAGTAGTTTTATTATTCATGTTT

ATGAATAAAGAATGATTAAGTCTGGGTACTATATTGGTACAATCTTTATTTAGCTATTAATGAGTA  
GTATGACATTATTTATAGGGTTTGTATCTGTTATAGCTATTTTATTTTATAGCCATTAATTTTATATTT  
GCTCCTCATAATCCTTATCAAGAAAAATATAGTATTTTCGAGTGTGGTTTCCATAGTTTTTATAGG  
CAAAATAGAACACAATTCGGTATAAAATTCCTTATTTTTCGCTTTAGTTTATTTACTTTTATAGATTTAG  
AAATATTATTAACCTTTCCCTTTTCGCTCTTAGTGAGTATGTTAATGGTATTTATGGTCTTTTATAGTTAC  
TTTAATTTTATAGCTATAATAACTATAGGATTTATATTTGAATTAGGTAAAAGCGCTCTTAAAATA  
GACAGCAGACAAAAATTATATATACCTAAATTGAACGTTAATTACCATACAGAGTATGTTGGAAT  
AGGTAAGGTTTCTAAGTAAAGTTATAGAGGCAGAAAACCAAAAAACCTACCAAAGGGTAGCTA  
ATGGGAAGCTATTAATAAATAAAGATGATAACCTATATATAGTATAGTTACTATATATTTACTATA  
ACTAGGATTATTATATATATATATATTATCTTATTGTATATTAAGATTATTATTATTATAAGGTATA  
ATTAATATAGTATCTTATTGTATAAGAATATAATATATTAACCTATAATTAATTTTATTTTAAATTT  
TTAATTATAATTTTTTTTTTATATCTAGATGCTTACACATCTACAGATGTAGAAGAGAACAAAATAT  
TGTTGTTATAGTAGTGGATGATATAGAAAAATATTTTATATTATTTATTTTGTAGGTAGCTTTT  
GAAGTGTGATAGAGAGGATATATGGACGGTAGGAGGGTATTCATTTTAATGAACAGTGGATA  
GTTTAAATTAACCTAGTTATAGTTTATGAATTTAAATTATAATTATATTAATGTAGGTATGATAGA  
ATTATGTATTGATCCTTAAGAGTTAAGAGAGATACGCCACGTATAATACATATTGGTTTAGGGT  
TGAGTATATATACTTAAGAGTTAAGAATATATATATACAATATATAATAAATATAGTAATATATTA  
ATGGTATGGACTTAACCAGGTTTATATATTATCATTTGATAAACATTAATTATAATTTTCTATTTA  
TTATTATTATTACTGTGAGATTAATAATTATTAATAATATAATTACATAGTACGTGATATTTGG  
GGATTTTATCTTATTAATTGGCAATTAATGATTCTAATCAAATTTTATTCTCTTTAGTTTAAATGGTA  
GAACAATGATCTTCTAATTCATTGGTTTTAGTTTCGATTCTAAAAAGAGATGAGTAAATAATTTTCT  
AGATCAGAAATACTACTTTTAACTACAAAAAGCTTACGCTTTTAAACATTTTTTTGATAAATAACA  
ACTATTGTTAATATTTGGCTGTCTATTGGTTTAACTACAATTACAAAATTTTTCAATTTTATAAT  
ATAAATTTAAATGAGAATATTAATAAAGTCATTCAATTATTAATAATTAGTGAATTCTTACCTTATCGA  
TGCGTCACAACCAAGTAACATTAGTTACTTGTGAAATTTTGGTTCATTATTAGCTGTTTGTTAAT  
AGTACAAATTATTACCGGTATTACATTAGCTATGCATTATAGTCCTAGTGTAATGGAAGCTTTTAA  
CTCAATAGAGCATATAATGAGAGATGTTAATAACGGGTGATTAGTTCGTTATCTACATAGTAATA  
CAGCTTCTGCTTTCTTTTCTTAGTGATTATACACATAGGAAGAGGTATATATTACGGATCATATA  
GAGCTCCTCGTACTTTAGTTTGAGCTATTGGTACTGTTATATTAATTAATGATGGCTATCGGT  
TCCTAGGTATGTTTTACCTTATGGACAGATGTCATTATGAGGTGCTACAGTTATTACTAATCTTA  
TTAGTGCTATACCTGAATAGGGCAAGATATTGTTGAATTCATTTGAGGTGGTTTTCTGTAAATA  
ATGCCACTTTAAACAGATTTTTGCATTACATTTGTATTGCCTTTTGTATTAGCTGCTTTAGTTTAA  
ATGCACTTAATTGCACTTCATGATACTGCTGGTTCAAGCAATCCTCTTGGTGTTTCAGGTAATTAC  
GATAGAATTACATTTGCTCCATATTTTTATTTAAAGATTTAATTACTATTTTATATTTATTTTGT  
TTAAGTGCTTTTGTATTCTTTATGCCTAATGTTTTAGGGGATAGTGATAATTATATTATGGCTAATC  
CTATGCAAACCTCCTGCTGCTATTGTACCTGAATGATACTTATTACCTTCTATGCTATTTTAAAGATC  
TATACCTAATAAATTATTAGGTGTTATAGCGATGTTTAGTGCTATTTTAGCTATTATGTTATTACCT  
GTTACAGATTTAGGTAGATCTAGAGGTTTACAATTTAGACCATTTAGTAAATAGCTTTCTGAGTT  
TTTGTTGCTAATTTCTTAGTTTTAATGCAATTAGGTGCTAAACACGTTGAAGATCCATTTATATTAT  
TAGGTCAATTAAGTACTGTATTATACTTTAGTTATTTTGTGCTATATTACCTTTAGCTAGTTACTT  
AGATAATAGTTTAACTGATTTATCTAATAAATCTGAATTATTTTAAATAAACTAACTAAATATAT  
TAAGATTATTATTTAATATATTTTCTATTTAAGATACTATTAATTTAGTATTTTGGGTTTTAGTTTA  
TAATTTATATTATATTATGCATTACCTCCACCTTGCTTTGTAGTAAGCTAATCTGTTATTTCTTTA  
GTTAATGGTAGAACAATGATCTTCTAATTCATTGGTTTTAGTTTGAATCTAAAAAGGAAATAAG

AAATATATTCTTATTATTACTTATATAATAATTATTTCTTAAAAATATACATTTTGCATTATAGCCGT  
TTAGCTGTATTAAAATGTAAAATGATATAAAATAGAATAAAATATTTAAATTATTCCTATGTTATATT  
ATCCTATATTGCAACCATTATCAGAAGTTGTATTAATACTTGTACCTGCCTTATTAGCTGTAGCTT  
ATGTTACAGTTGCTGAAAGAAAACTATGGCTAGTATGCAAAGAAGATTAGGTCCTAATGCTGT  
AGGTTACTATGGACTATTGCAAGCATTTGCTGATGCCTTAAAACTTTTATTAAGAATATGTAG  
CTCCTACACAATCTAATATTGTTCTTTTCTTTTAGGTCCTGTAATAACTTTAATTTTGCATTATTA  
GGTTACGCTGTTATACCCTATGGTCCTGGTTCAGGGATAAGCGACATGAATTTAGGTATATTTTA  
CATGTTAGCTGTGTCATCTTTAGCTACATACGGTATTCTATTAGCTGGTTGAAGTGCGAATAGTA  
AATACGCTTTTCTAGGTTCTCTTAGAAGTACAGCTCAATTAATTAGTTATGAATTAATATTAAGTT  
CAGCTATATTAATAGTAATTATGATAACAGGAAATTTAAATTTAACTGTTTGTACTGAATCTCAAA  
GAGCTATTTGATTTATACTACCTTTATTTCTGTGTTTATAATATTTTTCATAGGATCTATAGCTGA  
GACAAATAGAGCTCCTTTTGATTTAGCCGAGGCTAACCTGCTAATCTGGTTTGGTCTGGTTATAT  
GTCACAAATTGCTAGGAAACCTTTTTATTTAAAAACAAAAGACAATTAGCAGGAAACTTAATTT  
AACCTAATTAATAATTAGATAATTAACCTCTTCATAGACTAAACGTGACAATTTAATATATATA  
TATATTTATTTATATATATGATTAATAAGATATAGTCAATCATCGGTGTGAATCGACTTAAAAAA  
AAAAGCACATGGGTAAACCCATCTCCCTTATTAGGGGAATCAGAACTTGTTAGTGGGTTTCAT  
GACAGAGCATGCTGCCGTAGTTTTCGTATTCTTCTTTTAGCTGAGTACGGTAGTATTGTACTAAT  
GTGTATTTTAACTAGTATATTATTTATTGGTGGTTACTTATTATTTGAAATATCCTATGTTTTACTG  
TGGTAAATTATATTTTCTTTGAATTATTCTTTATAGACTGAGTAACATTTGTAGAGGTACAATCTTT  
ATACACTGATTTTTTAAATAATTCTATCATTGAAGGATTATTATATGGGTTAATCTAGGATTA  
AAGTTCTTTAATGATATTCACATTTATTTGAGCTAGAGCATCCTTCCCTAGAATACGATTTGATCA  
ACTAATGGGCTTCTGTTGAACAGTTTTATTACCTATTAATTTTGCAATTATTATATTAGTACCTTGT  
GTTTTATATAGTTTTAACTTATTACCTGTAAATATACCATTGTTCTAGCTCACACACCCGCCGCC  
CTACTGCCACAAGGCTACAGTACATATGAGGAGGGGAATAAGATCTAGAATACTATCCTAGTTA  
ATAATTACACTTAATAGTATACTAAATAGACCATCTATCATACTCGAGAATAGTGATAGTGTAAT  
TATACACTATTTTAACTGTATTCTACACTATTAGCATATTATTATCTTTATATGATAATAATTTTATA  
ACTTAATTTATTAGGTTACATTAACAAAAAATTCGTTAACTTTTTTCACCACTTTTAAACAAAAT  
ACGAATATTA

>YN673

ATAACAATTCTAAAGAACATAAAGAGTTATTAGATAAAAAATAATTCACCTATACAGTTAATAAAT  
CAACTTAAAGGGTATTTTTTCATAAATCCTTATTAGCTTTAAGTTTAGCTATTACTATTTTCTCTTT  
TGCAGGTATTCTCCTCTTGTAGGGTTCTTTGCTAAACAGATGGTATTAAGCGCGGCTATTGATC  
AAGGTTATATCTTTTATCTTTAGTTGCAATATTAAGTGTATAGGAGGGGTTTATTATTTAAA  
TATAATTAAGAAATGTTCTTTTATTCACCTGACTATAAATTAACGAAGAAATTAATAATAC  
TATTAATGGTCAAATTATTAATAGAAACAATAAAATATTAATGTTGAATTTAATTATACAAATGT  
AGTTATGTCTAGTTCTGTGGCAATAACTATTTCTACTATTACATTAGTAGTTTTATTATTCATGTTT  
ATGAATAAAGAATGATTAAGTCTGGGTACTATATTGGTACAATCTTTATTTAGCTATTAATGAGTA  
GTATGACATTATTTATAGGGTTGTATCTGTTATAGCTATTTTATTTTAGCCATTAATTTATATTT  
GCTCCTCATAATCCTTATCAAGAAAAATATAGTATTTTCGAGTGTGGTTCCATAGTTTTTTAGGG  
CAAAATAGAACACAATTCGGTATAAAATCTTTATTTTGCTTTAGTTTATTTACTTTTAGATTTAG  
AAATATTATTAACTTTCCCTTTCGCTCTTAGTGAGTATGTTAATGGTATTTATGGTCTTTTAGTTAC  
TTTAATTTTATAGCTATAATAACTATAGGATTTATATTTGAATTAGGTAAAAGCGCTCTTAAATA  
GACAGCAGACAAAATTATATATACCTAAATTGAACGTTAATTACCATACAGAGTATGTTGGAAT  
AGGTAAGGTTTCTAAGTAAAGTTATAGAGGCAGAAAACCAAAAAACCTACCAAGGGTAGCTA

ATGGGAAGCTATTA AAAAATAAAAGATGATAACCTATATATAGTATAGTTACTATATATTTACTATA  
ACTAGGATTATTATATATATATATATTATCTTATTGTATATTAAGATTATTATTATTATAAGGTATA  
ATTAATATAGTATCTTATTGTATAAGAATATAATATATTAACCTATAATTAATTTTATTTTTAATTT  
TTAATTATAATTTTTTTTTATATCTAGATGCTTACACATCTACAGATGTAGAAGAGAACAAAATAT  
TGTTGTTATAGTAGTGGATGATATAGAAAAATATTTTTATATTATTTATTTTTGTTAGGTAGCTTTT  
GAAGTGTTTGATAGAGAGGATATATGGACGGTAGGAGGGTATTCATTTTAATGAACAGTGGATA  
GTTTAAATTAACCTAGTTATAGTTTATGAATTTAAATTATAATTATATTAATGTAGGTTATGATAGA  
ATTATGTATTGATCCTTAAGAGTTAAGAGAGATACGCCACGTATAATACATATTGGTTTAGGGT  
TGAGTATATATACTTAAGAGTTAAGAATATATATATACAATATATAATAAATATAGTAATATATTA  
ATGGTATGGACTTAACCAGGTTTATATATTATCATTTGATAAACATTAATTATAATTTTTCTATTTA  
TTATTATTATTACTGTGAGATTAATAATTATTA AAAATATAATATTACATAGTACGTGATATTTGG  
GGATTTTATCTTATTAATTGGCAATTAATGATTCTAATCAAATTTTATTCTCTTTAGTTTAATGGTA  
GAACAATGATCTTCTAATTCATTGGTTTTAGTTTCGATTCTAAAAAGAGATGAGTAAATAATTTTCT  
AGATCAGAAATACTACTTTTAACTACAAAAAGCTTACGCTTTTAAACATTTTTTGTATAAATAACA  
ACTATTGTTAATATTTGGCTGTCTATTGGTTTAACTAACAATTACAAAATTTTTCAATTTTTATAAT  
ATAAATTTAAATGAGAATATTA AAAAGTCATTCATTATTA AAATTAGTGAATTCCTACCTTATCGA  
TGCGTCACAACCAAGTAACATTAGTTACTTGTGAAATTTTGGTTCATTATTAGCTGTTTGTTAAT  
AGTACAAATTATTACCGGTATTACATTAGCTATGCATTATAGTCCTAGTGAATGGAAGCTTTTAA  
CTCAATAGAGCATATAATGAGAGATGTTAATAACGGGTGATTAGTTCGTTATCTACATAGTAATA  
CAGCTTCTGCTTTCTTTTTCTTAGTGTATTTACACATAGGAAGAGGTATATATTACGGATCATATA  
GAGCTCCTCGTACTTTAGTTTGAGCTATTGGTACTGTTATATTAATTAATGATGGCTATCGGTT  
TCCTAGGTTATGTTTTACCTTATGGACAGATGTCATTATGAGGTGCTACAGTTATTACTAATCTTA  
TTAGTGCTATACCTGAATAGGGCAAGATATTGTTGAATTCATTTGAGGTGGTTTTCTGTTAATA  
ATGCCACTTTAAACAGATTTTTTGCAATTACATTTGTATTGCCTTTTGTATTAGCTGCTTTAGTTTA  
ATGCACTTAATTGCACTTCATGATACTGCTGGTTCAAGCAATCCTCTGGTGTTTCAGGTAATTAC  
GATAGAATTACATTTGCTCCATATTTTTATTTAAAGATTTAATTACTATTTTTATATTTATTTTGTA  
TTAAGTGCTTTTGTATTCTTTATGCCTAATGTTTTAGGGGATAGTGATAATTATATTATGGCTAATC  
CTATGCCAACTCCTGCTGCTATTGTACCTGAATGATACTTATTACCTTTCTATGCTATTTTAAGATC  
TATACCTAATAAATTATTAGGTGTTATAGCGATGTTTAGTGCTATTTTAGCTATTATGTTATTACCT  
GTTACAGATTTAGGTAGATCTAGAGGTTTACAATTTAGACCATTTAGTAAATAGCTTTCTGAGTT  
TTTGTTGCTAATTTCTTAGTTTAAATGCAATTAGGTGCTAAACACGTTGAAGATCCATTTATATTAT  
TAGGTCAATTAAGTACTGTATTATACTTTAGTTATTTTGTTGCTATATTACCTTTAGCTAGTTACTT  
AGATAATAGTTTAACTGATTTATCTAATAAATCTGAATTATTTTAAATAAACTAACTAAATATAT  
TAAGATTATTATTTAATATATTTTCTATTTAAGATACTATTAATTTAGTATTTTGGGTTTTCAGTTTA  
TAATTTATATTATATTATGCATTACCCTCCACCTTGCTTTGTAGTAAGCTAATCTGTTATTTCTTTA  
GTTTAATGGTAGAACAATGATCTTCTAATTCATTGGTTTTAGTTTGAATCTAAAAAGGAAATAAG  
AAATATATTCTTATTATTACTTATATAATAATTATTTCTTAAAAATATACATTTTGCATTATAGCCGT  
TTAGCTGTATTAAATGTAAATGATATAAAATAGAATAAATATTTAAATTATTCCTATGTTATATT  
ATCCTATATTGCAACCATTATCAGAAGTTGTATTAATACTTGTACCTGCCTTATTAGCTGTAGCTT  
ATGTTACAGTTGCTGAAAGAAAACTATGGCTAGTATGCAAAGAAGATTAGGTCCTAATGCTGT  
AGGTTACTATGGACTATTGCAAGCATTTGCTGATGCCTTAAACTTTTATTAAGAATATGTAG  
CTCCTACACAATCTAATATTGTTCTTTTCTTTTAGGTCCTGTAATAACTTTAATTTTTGCATTATTA  
GGTTACGCTGTTATACCCTATGGTCCTGGTTCAGGGATAAGCGACATGAATTTAGGTATATTTTA  
CATGTTAGCTGTGTCATCTTTAGCTACATACGGTATTCTATTAGCTGGTTGAAGTGCGAATAGTA

AATACGCTTTTCTAGGTTCTCTTAGAAGTACAGCTCAATTAATTAGTTATGAATTAATATTAAGTT  
CAGCTATATTAATAGTAATTATGATAACAGGAAATTTAAATTTAACTGTTTGTACTGAATCTCAAA  
GAGCTATTTGATTTATACTACCTTTATTTCCCTGTGTTTATAATATTTTTCATAGGATCTATAGCTGA  
GACAAATAGAGCTCCTTTTGATTTAGCCGAGGCTAACCTGCTAATCTGGTTTGGTCTGGTTATAT  
GTCACAAATTGCTAGGAAACCTTTTTATTTTAAAAACAAAAGACAATTAGCAGGAAACTTAATTT  
AACCTAATTAATAATATTAGATAATTAACTCTTCATAGACTAAACGTGACAATTTAATATATATA  
TATATTTATTTATATATATGATTAAATAAGATATAGTCAATCATCGGTGTGAATCGACTTAAAAAA  
AAAAGCACATGGGTAAACCCATCTCCCCTTATTAGGGGAATCAGAACTTGTTAGTGGGTTTCAT  
GACAGAGCATGCTGCCGTAGTTTTCGTATTCTTCTTTTGTAGCTGAGTACGGTAGTATTGTACTAAT  
GTGTATTTTAACTAGTATATTATTTATTGGTGGTTACTTATTATTTGAAATATCCTATGTTTTTACTG  
TGGTAAATTATATTTTCTTTGAATTATTCTTTATAGACTGAGTAACATTTGTAGAGGTACAATCTTT  
ATACACTGATTTTTTAAATAATTCTATCATTGAAGGATTATTATATGGGTTTAACTAGGATTA  
AAGTCTTTAATGATATTCACATTTATTTGAGCTAGAGCATCCTTCCCTAGAATACGATTTGATCA  
ACTAATGGGCTTCTGTTGAACAGTTTTATTACCTATTAATTTTGAATTATTATATTAGTACCTTGT  
GTTTTATATAGTTTTAACTTATTACCTGTAAATATACCATTGTTCTAGCTCACACACCCGCCGCC  
CTACTGCCACAAGGCTACAGTACATATGAGGAGGGGAATAAGATCTAGAATACTATCCTAGTTA  
ATAATTACACTTAATAGTATACTAAATAGACCATCTATCATACTCGAGAATAGTGATAGTGTAAT  
TATACACTATTTTAACTGTATTCTACACTATTAGCATATTATTATCTTTATATGATAATAATTTTATA  
ACTTAATTTATTAGGTTACATTAACAAAAAATTCGTTAACTTTTTTCACCACTTTTTAATACAAAAT  
ACGAATTTTA

>YN690

ATAACAATTCTAAAGAACATAAAGAGTTATTAGATAAAAAATAATTCACCTATACAGTTAATAAAT  
CAACTTAAAGGGTATTTTTTCATAAATCCTTTATTAGCTTTAAGTTTAGCTATTACTATTTTCTCTTT  
TGCAGGTATTCTCCTCTTGTAGGGTCTTTGCTAAACAGATGGTATTAAGCGCGGCTATTGATC  
AAGGTTATATCTTTTTATCTTTAGTTGCAATATTAAGTGTATAGGAGGGGTTTATTATTTAAA  
TATAATTAAGAAATGTTCTTTTATTCACCTGACTATAAATTAACGAAGAAATTAATAAATAC  
TATTAATGGTCAAATTATTAATAGAAACAATAAAATATTAATGTTGAATTTAATTATACAAATGT  
AGTTATGTCTAGTTCTGTGGCAATAACTATTTCTACTATTACATTAGTAGTTTTATTATTCATGTTT  
ATGAATAAAGAATGATTAAGTCTGGGTACTATATTGGTACAATCTTTATTTAGCTATTAATGAGTA  
GTATGACATTATTTATAGGGTTGTATCTGTTATAGCTATTTTATTTTGTAGCCATTAATTTATATTT  
GCTCCTCATAATCCTTATCAAGAAAAATATAGTATTTTCGAGTGTGGTTTCCATAGTTTTTTAGGG  
CAAAATAGAACACAATTCGGTATAAAATCTTTATTTTTGCTTTAGTTTATTTACTTTTAGATTTAG  
AAATATTATTAACTTTCCCTTTTCGCTCTTAGTGAGTATGTTAATGGTATTTATGGTCTTTTAGTTAC  
TTTAATTTTTTATAGCTATAATAACTATAGGATTTATATTTGAATTAGGTAAAAGCGCTCTTAAATA  
GACAGCAGACAAAAATTATATATACCTAAATTGAACGTTAATTACCATACAGAGTATGTTGGAAT  
AGGTAAGGTTTCTAAGTAAAGTTATAGAGGCAGAAAACCAAAAAACCTACCAAAGGGTAGCTA  
ATGGGAAGCTATTAATAAATAAAGATGATAACCTATATATAGTATAGTTACTATATATTTACTATA  
ACTAGGATTATTATATATATATATATTATCTTATTGTATATTAAGATTATTATTATAAGGTATA  
ATTAATATAGTATCTTATTGTATAAGAATATAATATATTAACCTATAATTAATTTTATTTTTAATTT  
TTAATTATAATTTTTTTTTATATCTAGATGCTTACACATCTACAGATGTAGAAGAGAACAAAATAT  
TGTTGTTATAGTAGTGATATAGAAAAATATTTTTATATTATTTATTTTGTAGGTAGCTTTT  
GAAGTGTTGATAGAGAGGATATATGGACGGTAGGAGGGTATTCATTTAATGAACAGTGGATA  
GTTTAAATTAACCTAGTTATAGTTTATGAATTTAAATTATAATTATTAATGTAGGTTATGATAGA  
ATTATGTATTGATCCTTAAGAGTTAAGAGAGATACGCCACGTATAATACATATTGGTTTAGGGT

TGAGTATATATACTTAAGAGTTAAGAATATATATATACAATATATAATAAATATAGTAATATATTA  
ATGGTATGGACTTAACCAGGTTTATATATTATCATTTGATAAACATTAATTATAATTTTTCTATTTA  
TTATTATTATTACTGTGAGATTAATAATTATTAATAATATTACATAGTACGTGATATTTGG  
GGATTTTATCTTATTAATTGGCAATTAATGATTCTAATCAAATTTTATTCTCTTTAGTTTAAATGGTA  
GAACAATGATCTTCTAATTCATTGGTTTTAGTTCGATTCTAAAAAGAGATGAGTAAATAATTTTCT  
AGATCAGAAATACTACTTTTAACTACAAAAAGCTTACGCTTTTTAACATTTTTTGATAAATAACA  
ACTATTGTTAATATTTGGCTGTCTATTGGTTTAACTAACAATTACAAAATTTTTCAATTTTTATAAT  
ATAAATTTAAATGAGAATATTAATAAGTCATTATTATTAATAATTAGTGAATTCTTACCTTATCGA  
TGCGTCACAACCAAGTAACATTAGTTACTTGTGAAATTTTGGTTCATTATTAGCTGTTTGTTAAT  
AGTACAAATTATTACCGGTATTACATTAGCTATGCATTATAGTCCTAGTGAATGGAAGCTTTTAA  
CTCAATAGAGCATATAATGAGAGATGTTAATAACGGGTGATTAGTTCGTTATCTACATAGTAATA  
CAGCTTCTGCTTTCTTTTTCTTAGTGTATTTACACATAGGAAGAGGTATATATTACGGATCATATA  
GAGCTCCTCGTACTTTAGTTTGAGCTATTGGTACTGTTATTAATTAATGATGGCTATCGGTT  
TCCTAGGTTATGTTTTACCTTATGGACAGATGTCATTATGAGGTGCTACAGTTATTACTAATCTTA  
TTAGTGCTATACCTGAATAGGGCAAGATATTGTTGAATTCATTGAGGTGGTTTTCTGTTAATA  
ATGCCACTTTAAACAGATTTTTGCATTACATTTGTATTGCCTTTGTATTAGCTGCTTAGTTTTA  
ATGCACTTAATTGCACTTCATGATACTGCTGGTTCAAGCAATCCTCTTGGTGTTTCAGGTAATTAC  
GATAGAATTACATTTGCTCCATATTTTTATTTAAAGATTTAATTACTATTTTTATTTATTTTTGTA  
TTAAGTGCTTTTGATTCTTTATGCCTAATGTTTTAGGGGATAGTGATAATTATATTATGGCTAATC  
CTATGCCAACTCCTGCTGCTATTGTACCTGAATGATACTTATTACCTTTCTATGCTATTTTAAGATC  
TATACCTAATAAATTATTAGGTGTTATAGCGATGTTTAGTGCTATTTAGCTATTATGTTATTACCT  
GTTACAGATTTAGGTAGATCTAGAGGTTTACAATTTAGACCATTTAGTAAATAGCTTTCTGAGTT  
TTTGTTGCTAATTTCTTAGTTTTAATGCAATTAGGTGCTAAACACGTTGAAGATCCATTATATTAT  
TAGGTCAATTAAGTACTGTATTATACTTTAGTTATTTTTGTTGCTATATTACCTTTAGCTAGTTACTT  
AGATAATAGTTTAACTGATTTATCTAATAAATCTGAATTATTTTAAATAAACTAACTAAATATAT  
TAAGATTATTATTTAATATATTTTCTATTTAAGATACTATTAATTTAGTATTTTGGGTTTTCAGTTTA  
TAATTTATATTATATTATGCATTACCCTCCACCTTGCTTTGTAGTAAGCTAATCTGTTATTTCTTTA  
GTTTAATGGTAGAACAATGATCTTCTAATTCATTGGTTTTAGTTCGAATCTAAAAAGGAAATAAG  
AAATATATTCTTATTATTACTTATATAATAATTATTTCTTAAAAATATACATTTTGCATTATAGCCGT  
TTAGCTGTATTAAATGTAAATGATATAAAATAGAATAAATATTTAAATTATTCCTATGTTATATT  
ATCCTATATTGCAACCATTATCAGAAGTTGATTAATACTTGTACCTGCCTTATTAGCTGTAGCTT  
ATGTTACAGTTGCTGAAAGAAAACTATGGCTAGTATGCAAAGAAGATTAGGTCCTAATGCTGT  
AGGTTACTATGGACTATTGCAAGCATTTGCTGATGCCTTAAACTTTTTATTAAGAATATGTAG  
CTCCTACACAATCTAATATTGTTCTTTCTTTTAGGTCCTGTAATAACTTTAATTTTTGCATTATTA  
GGTTACGCTGTTATACCCTATGGTCCTGGTTCAGGGATAAGCGACATGAATTTAGGTATATTTTA  
CATGTTAGCTGTGTCATCTTTAGCTACATACGGTATTCTATTAGCTGGTTGAAGTGCGAATAGTA  
AATACGCTTTTCTAGGTTCTCTTAGAAGTACAGCTCAATTAATTAGTTATGAATTAATATTAAGTT  
CAGCTATATTAATAGTAATTATGATAACAGGAAATTTAAATTTAACTGTTTGTACTGAATCTCAAA  
GAGCTATTTGATTTATACTACCTTTATTTCTGTGTTTATAATTTTTTCATAGGATCTATAGCTGA  
GACAAATAGAGCTCCTTTTGATTTAGCCGAGGCTAACCTGCTAATCTGGTTTGGTCTGGTTATAT  
GTCACAAATTGCTAGGAAACCTTTTTATTTAAAAACAAAAGACAATTAGCAGGAACTTAATTT  
AACCTAATTAATAATATTAGATAATTAACTCTTCATAGACTAAACGTGACAATTTAATATATATA  
TATATTTATTTATATATATGATTAAATAAGATATAGTCAATCATCGGTGTGAATCGACTTAAAAAA  
AAAAGCACATGGGTAAACCCATCTCCCCTTATTAGGGGAATCAGAACTTGTTAGTGGGTTTAT

GACAGAGCATGCTGCCGTAGTTTTCGTATTCTTCTTTTAGCTGAGTACGGTAGTATTGTACTAAT  
GTGTATTTAACTAGTATATTATTTATTGGTGGTTACTTATTATTTGAAATATCCTATGTTTTACTG  
TGGTAAATTATATTTTCTTTGAATTATTCTTTATAGACTGAGTAACATTTGTAGAGGTACAATCTTT  
ATACACTGATTTTTTAAATAATTCTATCATTGAAGGATTATTATATGGGTTTAATCTAGGATTAAA  
AAGTTCTTTAATGATATTCACATTTATTTGAGCTAGAGCATCCTTCCCTAGAATACGATTTGATCA  
ACTAATGGGCTTCTGTTGAACAGTTTTATTACCTATTAATTTTGCAATTATTATATTAGTACCTTGT  
GTTTTATATAGTTTTAACTTATTACCTGTAAATATACCATTGTTCTAGCTCACACACCCGCCGCC  
CTACTGCCACAAGGCTACAGTACATATGAGGAGGGGAATAAGATCTAGAATACTATCCTAGTTA  
ATAATTACACTTAATAGTATACTAAATAGACCATCTATCATACTCGAGAATAGTGATAGTGTAAT  
TATACACTATTTTAACTGTATTCTACACTATTAGCATATTATTATCTTTATATGATAATAATTTTATA  
ACTTAATTTATTAGGTTACATTAACAAAAAATTCGTTAACTTTTTTCACCACTTTTAAATACAAAAT  
ACGAATTTTA

>YN694

ATAACAATTCTAAAGAACATAAAGAGTTATTAGATAAAAAATAATTCACCTATACAGTTAATAAAT  
CAACTTAAAGGGTATTTTTTCATAAATCCTTTATTAGCTTTAAGTTTAGCTATTACTATTTTCTCTTT  
TGCAGGTATTCCTCCTCTGTAGGGTTCTTTGCTAAACAGATGGTATTAAGCGCGGCTATTGATC  
AAGGTTATATCTTTTTATCTTTAGTTGCAATATTAAGTAGTGTTATAGGAGGGGTTTATTATTTAAA  
TATAATTAAGAAATGTTCTTTTATTCACCTGACTATAAATTAACGAAGAAATTAATAAATAC  
TATTAATGGTCAAATTATTAATAGAAACAATAAAATATTAAATGTTGAATTTAATTATACAAATGT  
AGTTATGTCTAGTTCTGTGGCAATAACTATTTCTACTATTACATTAGTAGTTTTATTATTCATGTTT  
ATGAATAAAGAATGATTAAGTCTGGGTACTATATTGGTACAATCTTTATTTAGCTATTAATGAGTA  
GTATGACATTATTTATAGGGTTTGTATCTGTTATAGCTATTTTATTTTAGCCATTAATTTTATATTT  
GCTCCTCATAATCCTTATCAAGAAAAATATAGTATTTTCGAGTGTGGTTTCCATAGTTTTTTAGGG  
CAAAATAGAACACAATTCGGTATAAAATCTTTATTTTTGCTTTAGTTTATTTACTTTTAGATTTAG  
AAATATTATTAACTTTCCCTTTCGCTCTTAGTGAGTATGTTAATGGTATTTATGGTCTTTTAGTTAC  
TTTAATTTTTATAGCTATAATAACTATAGGATTTATATTTGAATTAGGTAAAAGCGCTCTTAAATA  
GACAGCAGACAAAAATTATATATACCTAAATTGAACGTTAATTACCATACAGAGTATGTTGGAAT  
AGGTAAGGTTTCTAAGTAAAGTTATAGAGGCAGAAAACCAAAAAACCTACCAAAGGGTAGCTA  
ATGGGAAGCTATTAATAAATAAAGATGATAACCTATATATAGTATAGTTACTATATATTTACTATA  
ACTAGGATTATTATATATATATATATTATCTTATTGTATATTAAGATTATTATTATAAGGTATA  
ATTAATATAGTATCTTATTGTATAAGAATATAATATATTAACCTATAATTAATTTTATTTTTAATTT  
TTAATTATAATTTTTTTTTATATCTAGATGCTTACACATCTACAGATGTAGAAGAGAACAAAATAT  
TGTTGTTATAGTAGTGGATGATATAGAAAAATATTTTTATATTATTTATTTTGTAGGTAGCTTTT  
GAAGTGTTTGATAGAGAGGATATATGGACGGTAGGAGGGTATTCATTTTAATGAACAGTGGATA  
GTTTAAATTAACCTAGTTATAGTTTATGAATTTAAATTATAATTATATTAATGTAGGTTATGATAGA  
ATTATGTATTGATCCTTAAGAGTTAAGAGAGATACGCCACGTATAATACATATTGGTTTAGGGT  
TGAGTATATATACTTAAGAGTTAAGAATATATATATACAATATATAATAAATATAGTAATATATTA  
ATGGTATGGACTTAACCAGGTTTATATATTATCATTTGATAAACATTAATTATAATTTTTCTATTTA  
TTATTATTATTACTGTGAGATTAATAATTATTAATAATATTACATAGTACGTGATATTTGG  
GGATTTTATCTTATTAATTGGCAATTAATGATTCTAATCAAATTTTATTCTCTTTAGTTTAAATGGTA  
GAACAATGATCTTCTAATTCATTGGTTTTAGTTTCGATTCTAAAAAGAGATGAGTAAATAATTTTCT  
AGATCAGAAATACTACTTTTAACTACAAAAAGCTTACGCTTTTTAACATTTTTTTGATAAATAACA  
ACTATTGTTAATATTTGGCTGTCTATTGGTTTAACTACAATTACAAAATTTTTCAATTTTTATAAT  
ATAAATTTAAATGAGAATATTAATAAAGTCATTCATTATTAATAATTAGTGAATCTTACCTTATCGA

TGCGTCACAACCAAGTAACATTAGTTACTTGTGAAATTTTGGTTCATTATTAGCTGTTTGTTAAT  
AGTACAAATTATTACCGGTATTACATTAGCTATGCATTATAGTCCTAGTGTAATGGAAGCTTTTAA  
CTCAATAGAGCATATAATGAGAGATGTTAATAACGGGTGATTAGTTCGTTATCTACATAGTAATA  
CAGCTTCTGCTTTCTTTTCTTAGTGATTTACACATAGGAAGAGGTATATATTACGGATCATATA  
GAGCTCCTCGTACTTTAGTTTGAGCTATTGGTACTGTTATATTAATTAATGATGGCTATCGGT  
TCCTAGGTTATGTTTACCTTATGGACAGATGTCATTATGAGGTGCTACAGTTACTAATCTTA  
TTAGTGCTATACCTGAATAGGGCAAGATATTGTTGAATTCATTTGAGGTGGTTTTCTGTTAATA  
ATGCCACTTTAAACAGATTTTTGCATTACATTTGTATTGCCTTTGTATTAGCTGCTTTAGTTTA  
ATGCACTTAATTGCACTTCATGATACTGCTGGTTCAAGCAATCCTCTGGTGTTTCAGGTAATTAC  
GATAGAATTACATTTGCTCCATATTTTTATTTAAAGATTTAATTACTATTTTTATATTTATTTTGT  
TTAAGTGCTTTGTATTCTTTATGCCTAATGTTTAGGGGATAGTGATAATTATATTATGGCTAATC  
CTATGCAAACCTCCTGCTGCTATTGTACCTGAATGATACTTATTACCTTTCTATGCTATTTAAGATC  
TATACCTAATAAATTATTAGGTGTTATAGCGATGTTTAGTGCTATTTAGCTATTATGTTATTACCT  
GTTACAGATTTAGGTAGATCTAGAGGTTTACAATTTAGACCATTTAGTAAATAGCTTTCTGAGTT  
TTTGTTGCTAATTTCTTAGTTTTAATGCAATTAGGTGCTAAACACGTTGAAGATCCATTTATATTAT  
TAGGTCAATTAAGTACTGTATTATACTTTAGTTATTTTGTGCTATATTACCTTTAGCTAGTTACTT  
AGATAATAGTTTAACTGATTTATCTAATAAATCTGAATTATTTTAAATAAAACTAACTAAATATAT  
TAAGATTATTATTTAATATATTTTCTATTTAAGATACTATTAATTTAGTATTTTGGGTTTTAGTTTA  
TAATTTATATTATATTATGCATTACCCTCCACCTTGCTTTGTAGTAAGCTAATCTGTTATTTCTTTA  
GTTTAATGGTAGAACAATGATCTTCTAATTCATTGGTTTTAGTTTGAATCTAAAAAGGAAATAAG  
AAATATATTCTTATTATTACTTATATAATAATTATTTCTTAAAAATATACATTTTGCAATTATAGCCGT  
TTAGCTGTATTTAAATGTAAATGATATAAAATAGAATAAATATTTAAATTATTCCTATGTTATATT  
ATCCTATATTGCAACCATTATCAGAAGTTGTATTAATACTTGTACCTGCCTTATTAGCTGTAGCTT  
ATGTTACAGTTGCTGAAAGAAAACTATGGCTAGTATGCAAAGAAGATTAGGTCCTAATGCTGT  
AGGTTACTATGGACTATTGCAAGCATTGCTGATGCCTTAAACTTTTATTTAAAGAATATGTAG  
CTCCTACACAATCTAATATTGTTCTTTTCTTTTAGGTCTGTAAATAACTTTAATTTTGCATTATTA  
GGTTACGCTGTTATACCCTATGGTCCTGGTTCAGGGATAAGCGACATGAATTTAGGTATATTTTA  
CATGTTAGCTGTGTCATCTTTAGCTACATACGGTATTCTATTAGCTGGTTGAAGTGCGAATAGTA  
AATACGCTTTTCTAGGTTCTCTTAGAAGTACAGCTCAATTAATTAGTTATGAATTAATATTAAGTT  
CAGCTATATTAATAGTAATTATGATAACAGGAAATTTAAATTTAACTGTTTGTACTGAATCTCAAA  
GAGCTATTTGATTTATACTACCTTTATTTCTGTGTTTATAATATTTTTCATAGGATCTATAGCTGA  
GACAAATAGAGCTCCTTTGATTTAGCCGAGGCTAACCTGCTAATCTGGTTTGGTCTGGTTATAT  
GTCACAAATTGCTAGGAAACCTTTTTATTTAAAAACAAAAGACAATTAGCAGGAAACTTAATTT  
AACCTAATTAATAATATTAGATAATTAACCTCTCATAGACTAAACGTGACAATTTAATATATATA  
TATATTTATTTATATATATGATTAATAAGATATAGTCAATCATCGGTGTGAATCGACTTAAAAAA  
AAAAGCACATGGGTAAACCCATCTCCCCTTATTAGGGGAATCAGAACTTGTTAGTGGGTTTCAT  
GACAGAGCATGCTGCCGTAGTTTTCGTATTCTTCTTTTAGCTGAGTACGGTAGTATTGTACTAAT  
GTGTATTTTAACTAGTATATTATTTATTGGTGGTTACTTATTATTTGAAATATCCTATGTTTTACTG  
TGGTAAATTATATTTTCTTTGAATTATCTTTATAGACTGAGTAACATTTGTAGAGGTACAATCTTT  
ATACACTGATTTTTTAAATAATTCTATCATTGAAGGATTATTATATGGGTTAATCTAGGATTAAA  
AAGTTCTTTAATGATATTCACATTTATTTGAGCTAGAGCATCCTTCCCTAGAATACGATTTGATCA  
ACTAATGGGCTTCTGTTGAACAGTTTTATTACCTATTAATTTTGCAATTATTATATTAGTACCTTGT  
GTTTTATATAGTTTTAACTTATTACCTGTAAATATACCATTGTTCTAGCTCACACACCCGCCGCC  
CTACTGCCACAAGGCTACAGTACATATGAGGAGGGGAAGTAAAGATCTAGAAGTATCCTAGTTA

ATAATTACACTTAATAGTATACTAAATAGACCATCTATCATACTCGAGAATAGTGATAGTGTAAT  
TATACACTATTTTAACTGTATTCTACACTATTAGCATATTATTATCTTTATATGATAATAATTTTATA  
ACTTAATTTATTAGGTTACATTAACAAAAAATTCGTTAACTTTTTTCACCACTTTTAAACAAAAAT  
ACGAATTATA

>YN714

ATAACAATTCTAAAGAACATAAAGAGTTATTAGATAAAAAATAATTCACCTATACAGTTAATAAAT  
CAACTTAAAGGGTATTTTTTCATAAATCCTTTATTAGCTTTAAGTTTAGCTATTACTATTTCTCTTT  
TGCAGGTATTCCTCCTCTGTAGGGTTCTTTGCTAAACAGATGGTATTAAGCGCGGCTATTGATC  
AAGGTTATATCTTTTTATCTTTAGTTGCAATATTAAGTGTATAGGAGGGGTTTATTATTTAAA  
TATAATTAAGAAATGTTCTTTTATTCACCTGACTATAAATTAAACGAAGAAATTAATAAATAC  
TATTAATGGTCAAATTATTAATAGAAACAATAAAATATTAATGTTGAATTTAATTATACAAATGT  
AGTTATGTCTAGTTCTGTGGCAATAACTATTTCTACTATTACATTAGTAGTTTTATTATTCATGTTT  
ATGAATAAAGAATGATTAAGTCTGGGTACTATATTGGTACAATCTTTATTTAGCTATTAATGAGTA  
GTATGACATTATTTATAGGGTTTGTATCTGTTATAGCTATTTTATTTTAGCCATTAATTTTATATTT  
GCTCCTCATAATCCTTATCAAGAAAAATATAGTATTTTCGAGTGTGGTTTCCATAGTTTTTTAGGG  
CAAAATAGAACACAATTCGGTATAAAATCCTTATTTTGTCTTAGTTTATTTACTTTTAGATTTAG  
AAATATTATTAACTTCCCTTTCGCTCTTAGTGAGTATGTTAATGGTATTTATGGTCTTTTAGTTAC  
TTTAATTTTATAGCTATAATAACTATAGGATTTATATTTGAATTAGGTAAAAGCGCTCTTAAATA  
GACAGCAGACAAAAATTATATATACCTAAATTGAACGTTAATTACCATACAGAGTATGTTGGAAT  
AGGTAAGGTTTCTAAGTAAAGTTATAGAGGCAGAAAACCAAAAAACCTACCAAAGGGTAGCTA  
ATGGGAAGCTATTAATAAAGATGATAACCTATATATAGTATAGTTACTATATATTTACTATA  
ACTAGGATTATTATATATATATATTATCTTATTGTATATTAAGATTATTATTATTATAAGGTATA  
ATTAATATAGTATCTTATTGTATAAGAATATAATATATTAACCTATAATTAATTTTATTTTAAATTT  
TTAATTATAATTTTTTTTTTATATCTAGATGCTTACACATCTACAGATGTAGAAGAGAACAAAATAT  
TGTTGTTATAGTAGTGGATGATATAGAAAAATATTTTTATATTATTTATTTTGTAGGTAGCTTTT  
GAAGTGTTTGATAGAGAGGATATATGGACGGTAGGAGGGTATTCATTTTAATGAACAGTGGATA  
GTTTAAATTAACCTAGTTATAGTTTATGAATTTAAATTATAATTATATTAATGTAGGTTATGATAGA  
ATTATGTATTGATCCTTAAGAGTTAAGAGAGATACGCCACGTATAATACATATTGGTTTAGGGT  
TGAGTATATATACTTAAGAGTTAAGAATATATATATACAATATATAATAAATATAGTAATATATTA  
ATGGTATGGACTTAACCAGGTTTATATATTATCATTGATAAACATTAATTATAATTTTCTATTTA  
TTATTATTATTACTGTGAGATTAATAATTATTAATAATATTACATAGTACGTGATATTTGG  
GGATTTTATCTTATTAATTGGCAATTAATGATTCTAATCAAATTTTATTCTCTTTAGTTTAAATGGTA  
GAACAATGATCTTCTAATTCATTGGTTTTAGTTTCGATTCTAAAAAGAGATGAGTAAATAATTTTCT  
AGATCAGAAATACTACTTTTAACTACAAAAAGCTTACGCTTTTAAACATTTTTTTGATAAATAACA  
ACTATTGTTAATATTTGGCTGTCTATTGGTTTAACTAACAATTACAAAATTTTTCAATTTTTATAAT  
ATAAATTTAAATGAGAATATTAATAAGTCATTATTATTAATAATAGTGAATTCTTACCTTATCGA  
TGCCTCACAAACCAAGTAACATTAGTTACTTGTGAAATTTTGGTTCATTATTAGCTGTTTGTAAAT  
AGTACAAATTATTACCGGTATTACATTAGCTATGCATTATAGTCCTAGTGAATGGAAGCTTTTAA  
CTCAATAGAGCATATAATGAGAGATGTTAATAACGGGTGATTAGTTCGTTATCTACATAGTAATA  
CAGCTTCTGCTTTCTTTTCTTAGTGTATTTACACATAGGAAGAGGTATATATTACGGATCATATA  
GAGCTCCTCGTACTTTAGTTTGAGCTATTGGTACTGTTATATTAATTAATGATGGCTATCGGTT  
TCCTAGGTTATGTTTTACCTTATGGACAGATGTCATTATGAGGTGCTACAGTTATTACTAATCTTA  
TTAGTGCTATACCTGAATAGGGCAAGATATTGTTGAATTCATTTGAGGTGGTTTTCTGTAAATA  
ATGCCACTTAAACAGATTTTTTGCATTACATTTGTATTGCCTTTGTATTAGCTGCTTTAGTTTAA

ATGCACTTAATTGCACTTCATGATACTGCTGGTTCAAGCAATCCTCTTGGTGTTTCAGGTAATTAC  
GATAGAATTACATTTGCTCCATATTTTTATTTAAAGATTTAATTACTATTTTTATATTTATTTTTGTA  
TTAAGTGCTTTTGATTCTTTATGCCTAATGTTTTAGGGGATAGTGATAATTATATTATGGCTAATC  
CTATGCAAACCTCCTGCTGCTATTGTACCTGAATGATACTTATTACCTTTCTATGCTATTTTAAGATC  
TATACCTAATAAATTATTAGGTGTTATAGCGATGTTTAGTGCTATTTTAGCTATTATGTTATTACCT  
GTTACAGATTTAGGTAGATCTAGAGGTTTACAATTTAGACCATTTAGTAAAATAGCTTTCTGAGTT  
TTTGTTGCTAATTTCTTAGTTTTAATGCAATTAGGTGCTAAACACGTTGAAGATCCATTTATATTAT  
TAGGTCAATTAAGTACTGTATTATACTTTAGTTATTTTTGTTGCTATATTACCTTTAGCTAGTACTT  
AGATAATAGTTTAACTGATTTATCTAATAAATCTGAATTATTTTTAAATAAACTAACTAAATATAT  
TAAGATTATTATTTAATATATTTTCTATTTAAGATACTATTAATTTAGTATTTTGGGTTTTAGTTTA  
TAATTTATATTATATTATGCATTACCCTCCACCTTGCTTTGTAGTAAGCTAATCTGTTATTTCTTTA  
GTTTAATGGTAGAACAATGATCTTCTAATTCATTGGTTTTAGTTCGAATCTAAAAAGGAAATAAG  
AAATATATTCTTATTACTTATATAATAATTATTTCTTAAAAATATACATTTTGCAATTATAGCCGT  
TTAGCTGTATTAATAATGTAAATGATATAAAATAGAATAAATATTTAAATTATTCCTATGTTATATT  
ATCCTATATTGCAACCATTATCAGAAGTTGTATTAATACTTGTACCTGCCTTATTAGCTGTAGCTT  
ATGTTACAGTTGCTGAAAGAAAACTATGGCTAGTATGCAAAGAAGATTAGGTCCTAATGCTGT  
AGGTTACTATGGACTATTGCAAGCATTTGCTGATGCCTTAAACCTTTTATTAAGAATATGTAG  
CTCCTACACAATCTAATATTGTTCTTTTCTTTTAGGTCCTGTAATAACTTTAATTTTGCATTATTA  
GGTTACGCTGTTATACCCTATGGTCCTGGTTCAGGGATAAGCGACATGAATTTAGGTATATTTTA  
CATGTTAGCTGTGTCATCTTTAGCTACATACGGTATTCTATTAGCTGGTTGAAGTGCGAATAGTA  
AATACGCTTTTCTAGGTTCTCTTAGAAGTACAGCTCAATTAATTAGTTATGAATTAATTAAGTT  
CAGCTATATTAATAGTAATTATGATAACAGGAAATTTAAATTTAACTGTTTGTACTGAATCTCAAA  
GAGCTATTTGATTTATACTACCTTTATTTCTGTGTTTATAATATTTTTCATAGGATCTATAGCTGA  
GACAAATAGAGCTCCTTTTGATTTAGCCGAGGCTAACCTGCTAATCTGGTTTGGTCTGGTTATAT  
GTCACAAATTGCTAGGAAACCTTTTTATTTAAAAACAAAAGACAATTAGCAGGAACTTAATTT  
AACCTAATTAATAATTAGATAAATAAATCTTTCATAGACTAAACGTGACAATTTAATATATATA  
TATATTTATTTATATATATGATTAATAAGATATAGTCAATCATCGGTGTGAATCGACTTAAAAAA  
AAAAGCACATGGGTAAACCCATCTCCCCTTATTAGGGGAATCAGAACTTGTTAGTGGGTTTCAT  
GACAGAGCATGCTGCCGTAGTTTTCGTATTCTTCTTTTATAGCTGAGTACGGTAGTATTGTACTAAT  
GTGTATTTTAACTAGTATATTATTTATTGGTGGTTACTTATTATTTGAAATATCCTATGTTTTTACTG  
TGGTAAATTATATTTTCTTTGAATTATTCTTTATAGACTGAGTAACATTTGTAGAGGTACAATCTTT  
ATACACTGATTTTTTAAATAATTCTATCATTGAAGGATTATTATATGGGTTTAACTAGGATTA  
AAGTTCTTTAATGATATTCACATTTATTTGAGCTAGAGCATCCTTCCCTAGAATACGATTTGATCA  
ACTAATGGGCTTCTGTTGAACAGTTTTATTACCTATTAATTTTGAATTATTATATTAGTACCTTGT  
GTTTTATATAGTTTTAACTTATTACCTGTAAATATACCATTGTTCTAGCTCACACACCCGCCGCC  
CTACTGCCACAAGGCTACAGTACATATGAGGAGGGGAATAAGATCTAGAACTATCCTAGTTA  
ATAATTACACTTAATAGTATACTAAATAGACCATCTATCATACTCGAGAATAGTGATAGTGAAT  
TATACACTATTTTAACTGTATTCTACACTATTAGGATATTATTATCTTTATATGATAATAATTTTATA  
ACTTAATTTATTAGGTTACATTAACAAAAAATTCGTTAACTTTTTTACCACTTTTTAATACAAAAT  
ACGAATTTTA

>YN716

ATAACAATTCTAAAGAACATAAAGAGTTATTAGATAAAAAATAATTCACCTATACAGTTAATAAAT  
CAACTTAAAGGTATTTTTTCATAAATCCTTTATTAGCTTTAAGTTTAGCTATTACTATTTTCTCTTT  
TGCAGGTATTCCTCCTCTTGTAGGGTTCTTTGCTAAACAGATGGTATTAAGCGCGGCTATTGATC

AAGGTTATATCTTTTATCTTTAGTTGCAATATTAAGTGTATAGGAGGGGTTTATTATTTAAA  
TATAATTAAGAAATGTTCTTTTATTCACCTGACTATAAATTAACGAAGAAATTAATAATAC  
TATTAATGGTCAAATTATTAATAGAAACAATAAAATATTAATGTTGAATTTAATTATACAAATGT  
AGTTATGTCTAGTTCTGTGGCAATAACTATTTCTACTATTACATTAGTAGTTTTATTATTCATGTTT  
ATGAATAAAGAATGATTAAGTCTGGGTACTATATTGGTACAATCTTTATTTAGCTATTAATGAGTA  
GTATGACATTATTTATAGGGTTTGTATCTGTTATAGCTATTTTATTTTAGCCATTAATTTTATATTT  
GCTCCTCATAATCCTTATCAAGAAAAATATAGTATTTTCGAGTGTGGTTTCCATAGTTTTTTAGGG  
CAAAATAGAACACAATTCGGTATAAAATCTTTATTTTGCTTTAGTTTATTTACTTTTAGATTTAG  
AAATATTATTAACTTTCCCTTTCGCTCTTAGTGAGTATGTTAATGGTATTTATGGTCTTTTAGTTAC  
TTTAATTTTATAGCTATAATAACTATAGGATTTATATTTGAATTAGGTAAAAGCGCTCTTAAATA  
GACAGCAGACAAAAATTATATACCTAAATTGAACGTTAATTACCATACAGAGTATGTTGGAAT  
AGGTAAGGTTTCTAAGTAAAGTTATAGAGGCAGAAAACCAAAAAACCTACCAAAGGGTAGCTA  
ATGGGAAGCTATTAATAAAAGATGATAACCTATATATAGTATAGTTACTATATATTTACTATA  
ACTAGGATTATTATATATATATATATTATCTTATTGTATATTAAGATTATTATTATAAGGTATA  
ATTAATATAGTATCTTATTGTATAAGAATATAATATATTAACCTATAATTAATTTTATTTTAAATTT  
TTAATTATAATTTTTTTTATATCTAGATGCTTACACATCTACAGATGTAGAAGAGAACAAAATAT  
TGTTGTTATAGTAGTGGATGATATAGAAAAATATTTTATATTATTTATTTTGTAGGTAGCTTTT  
GAAGTGTGATAGAGAGGATATATGGACGGTAGGAGGTATTCATTTAATGAACAGTGGATA  
GTTTAAATTAACCTAGTTATAGTTTATGAATTTAAATTATAATTATATTAATGTAGGTTATGATAGA  
ATTATGTATTGATCCTTAAGAGTTAAGAGAGATACGCCCACGTATAATACATATTGGTTTAGGGT  
TGAGTATATATACTTAAGAGTTAAGAATATATATATACAATATATAATAAATATAGTAATATATTA  
ATGGTATGGACTTAACCAGGTTTATATATTATCATTTGATAAACATTAATTATAATTTTCTATTTA  
TTATTATTATACTGTGAGATTAATAATTATTAATAATATTACATAGTACGTGATATTTGG  
GGATTTTATCTTATTAATTGGCAATTAATGATTCTAATCAAATTTTATTCTCTTTAGTTTAAATGGTA  
GAACAATGATCTTCTAATTCATTGGTTTTAGTTGATTCTAAAAAGAGATGAGTAAATAATTTTCT  
AGATCAGAAATACTACTTTTAACTACAAAAAGCTTACGCTTTTAAACATTTTTTGTAAATAACA  
ACTATTGTTAATATTTGGCTGTCTATTGGTTTAACTAACAATTACAAAATTTTTCAATTTTTATAAT  
ATAAATTTAAATGAGAATATTAATAAGTCATTATTATTAATAATAGTGAATCTTACCTTATCGA  
TGCGTCACAACCAAGTAACATTAGTTACTTGTGAAATTTTGGTTCATTATTAGCTGTTTGTTAAT  
AGTACAAATTATTACCGGTATTACATTAGCTATGCATTATAGTCCTAGTGAATGGAAGCTTTTAA  
CTCAATAGAGCATATAATGAGAGATGTTAATAACGGGTGATTAGTTCGTTATCTACATAGTAATA  
CAGCTTCTGCTTCTTTTCTTAGTGTATTTACACATAGGAAGAGGTATATATTACGGATCATATA  
GAGCTCCTCGTACTTTAGTTGAGCTATTGGTACTGTTATATTAATATTAATGATGGCTATCGGTT  
TCCTAGGTTATGTTTTACCTTATGGACAGATGTCATTATGAGGTGCTACAGTTATTACTAATCTTA  
TTAGTGCTATACCTGAATAGGGCAAGATATTGTTGAATTCATTTGAGGTGGTTTTCTGTTAATA  
ATGCCACTTTAAACAGATTTTTGCATTACATTTGTATTGCCTTTGTATTAGCTGCTTTAGTTTA  
ATGCACTTAATTGCACTTCATGATACTGCTGGTTCAAGCAATCCTCTTGGTGTTCAGGTAATTAC  
GATAGAATTACATTTGCTCCATATTTTTATTTAAAGATTTAATTACTATTTTATATTTATTTTGT  
TTAAGTGCTTTTGTATTCTTTATGCCTAATGTTTTAGGGGATAGTGATAATTATATTATGGCTAATC  
CTATGCAAACCTCCTGCTGCTATTGTACCTGAATGATACTTATTACCTTTCTATGCTATTTTAAAGATC  
TATACCTAATAAATTATTAGGTGTTATAGCGATGTTTAGTGCTATTTAGCTATTATGTTATTACCT  
GTTACAGATTTAGGTAGATCTAGAGGTTTACAATTTAGACCATTTAGTAAATAGCTTTCTGAGTT  
TTTGTTGCTAATTTCTTAGTTTAAATGCAATTAGGTGCTAAACACGTTGAAGATCCATTTATATTAT  
TAGGTCAATTAAGTACTGTATTATACTTTAGTTATTTTGTGCTATATTACCTTTAGCTAGTTACTT

AGATAATAGTTTAACTGATTTATCTAATAAATCTGAATTATTTTTAAATAAACTAACTAAATATAT  
TAAGATTATTATTTAATATATTTTCTATTTAAGATACTATTAATTTAGTATTTTGGGTTTTAGTTTA  
TAATTTATATTATATTATGCATTACCTCCACCTTGCTTTGTAGTAAGCTAATCTGTTATTTCCCTTA  
GTTTAATGGTAGAACAATGATCTTCTAATTCATTGGTTTTAGTTTGAATCTAAAAAGGAAATAAG  
AAATATATTCTTATTATTACTTATATAATAATTATTTCTTAAAAATATACATTTTGCATTATAGCCGT  
TTAGCTGTATTAAATGTAAATGATATAAAATAGAATAAATATTTAAATTATTCCTATGTTATATT  
ATCCTATATTGCAACCATTATCAGAAAGTTGTATTAATACTTGTACCTGCCTTATTAGCTGTAGCTT  
ATGTTACAGTTGCTGAAAGAAAACTATGGCTAGTATGCAAAGAAGATTAGGTCCTAATGCTGT  
AGGTTACTATGGACTATTGCAAGCATTGCTGATGCCTTAAACTTTTTATTTAAAGAATATGTAG  
CTCCTACACAATCTAATATTGTTCTTTTCTTTTAGGTCCTGTAATAACTTTAATTTTTGCATTATTA  
GGTTACGCTGTTATACCCTATGGTCCTGGTTCAGGGATAAGCGACATGAATTTAGGTATATTTTA  
CATGTTAGCTGTGTCATCTTTAGCTACATACGGTATTCTATTAGCTGGTTGAAGTGCGAATAGTA  
AATACGCTTTTCTAGGTTCTCTTAGAAGTACAGCTCAATTAATTAGTTATGAATTAATTAAGTT  
CAGCTATATTAATAGTAATTATGATAACAGGAAATTTAAATTTAACTGTTTGTACTGAATCTCAAA  
GAGCTATTTGATTTATACTACCTTTATTTCTGTGTTTATAATTTTTTCATAGGATCTATAGCTGA  
GACAAATAGAGCTCCTTTTGATTTAGCCGAGGCTAACCTGCTAATCTGGTTTGGTCTGGTTATAT  
GTCACAAATTGCTAGGAAACCTTTTTATTTAAAAACAAAAGACAATTAGCAGGAAACTTAATTT  
AACCTAATTTAAATATTAGATAATTAACTCTTCATAGACTAAACGTGACAATTTAATATATATA  
TATATTTATTTATATATATGATTAAATAAGATATAGTCAATCATCGGTGTGAATCGACTTAAAAAA  
AAAAGCACATGGGTAAACCCATCTCCCCTTATTAGGGGAATCAGAACTTGTTAGTGGGTTTCAT  
GACAGAGCATGCTGCCGTAGTTTTCGTATTCTTCTTTTAGCTGAGTACGGTAGTATTGTACTAAT  
GTGTATTTTAACTAGTATATTATTTATTGGTGGTTACTTATTATTTGAAATATCCTATGTTTTACTG  
TGGTAAATTATATTTCTTTGAATTATTCTTTATAGACTGAGTAACATTTGTAGAGGTACAATCTTT  
ATACACTGATTTTTTAAATAATTCTATCATTGAAGGATTATTATATGGGTTTAACTAGGATTAAA  
AAGTTCTTTAATGATATTCACATTTATTTGAGCTAGAGCATCCTTCCCTAGAATACGATTTGATCA  
ACTAATGGGCTTCTGTTGAACAGTTTTATTACCTATTAATTTTGCAATTATTATATTAGTACCTTGT  
GTTTTATATAGTTTTAACTTATTACCTGTAAATATACCATTGTTCTAGCTCACACACCCGCCGCC  
CTACTGCCACAAGGCTACAGTACATATGAGGAGGGGAACTAAAGATCTAGAACTATCCTAGTTA  
ATAATTACACTTAATAGTATACTAAATAGACCATCTATCATACTCGAGAATAGTGATAGTGAAT  
TATACACTATTTTAACTGTATTCTACACTATTAGCATATTATTATCTTTATATGATAATAATTTATA  
ACTTAATTTATTAGGTTACATTAACAAAAAATTCGTTAACTTTTTTCACCACTTTTAAATACAAAAT  
ACGAATTTTA

>YN718

ATAACAATTCTAAAGAACATAAAGAGTTATTAGATAAAAAATAATTCACCTATACAGTTAATAAAT  
CAACTTAAAGGGTATTTTTTCATAAATCCTTTATTAGCTTTAAGTTTAGCTATTACTATTTCTCTTT  
TGCAGGTATTCCTCCTCTTGTAGGGTTCTTGCTAAACAGATGGTATTAAGCGCGGCTATTGATC  
AAGGTTATATCTTTTATCTTTAGTTGCAATATTAAGTGTATAGGAGGGGTTTATTATTTAAA  
TATAATTAAGAAATGTTCTTTTATTCACCTGACTATAAATTAAACGAAGAAATTAATAAATAC  
TATTAATGGTCAAATTATTAATAGAAACAATAAAATATTAAATGTTGAATTTAATTATACAAATGT  
AGTTATGTCTAGTTCTGTGGCAATAACTATTTCTACTATTACATTAGTAGTTTTATTATTCATGTTT  
ATGAATAAAGAATGATTAAGTCTGGGTACTATATTGGTACAATCTTTATTTAGCTATTAATGAGTA  
GTATGACATTATTTATAGGGTTTGTATCTGTTATAGCTATTTTATTTTAGCCATTAATTTATATTT  
GCTCCTCATAATCCTTATCAAGAAAAATATAGTATTTTCGAGTGTGGTTTCCATAGTTTTTAGGG  
CAAAATAGAACACAATTCGGTATAAAATCTTTATTTTGTCTTAGTTTATTTACTTTTAGATTTAG

AAATATTATTAACTTTCCCTTTCGCTCTTAGTGAGTATGTTAATGGTATTTATGGTCTTTTAGTTAC  
TTTAATTTTTATAGCTATAATAACTATAGGATTTATATTTGAATTAGGTAAAAGCGCTCTTAAAATA  
GACAGCAGACAAAAATTATATATACCTAAATTGAACGTTAATTACCATACAGAGTATGTTGGAAT  
AGGTAAGGTTTCTAAGTAAAGTTATAGAGGCAGAAAACCAAAAAACCTACCAAAGGGTAGCTA  
ATGGGAAGCTATTAATAAATAAAGATGATAACCTATATATAGTATAGTTACTATATATTTACTATA  
ACTAGGATTATTATATATATATATATTATCTTATTGTATATTAAGATTATTATTATAAGGTATA  
ATTAATATAGTATCTTATTGTATAAGAATATAATATATTAACCTATAATTAATTTTATTTTTAATTT  
TTAATTATAATTTTTTTTTATATCTAGATGCTTACACATCTACAGATGTAGAAGAGAACAAAATAT  
TGTTGTTATAGTAGTGGATGATATAGAAAAATTTTTATATTATTTATTTTTGTTAGGTAGCTTTT  
GAAGTGTTTGATAGAGAGGATATATGGACGGTAGGAGGGTATTCATTTTAATGAACAGTGGATA  
GTTTAAATTAACCTAGTTATAGTTTATGAATTTAAATTATAATTATATTAATGTAGGTTATGATAGA  
ATTATGTATTGATCCTTAAGAGTTAAGAGAGATACGCCACGTATAATACATATTGGTTTAGGGT  
TGAGTATATATACTTAAGAGTTAAGAATATATATATACAATATATAATAAATATAGTAATATATTA  
ATGGTATGGACTTAACCAGGTTTATATATTATCATTTGATAAACATTAATTATAATTTTTCTATTTA  
TTATTATTATTATACTGTGAGATTAATAATTATTAATAATATAATATTACATAGTACGTGATATTTGG  
GGATTTTATCTTATTAATTGGCAATTAATGATTCTAATCAAATTTTATTCTCTTTAGTTTAATGGTA  
GAACAATGATCTTCTAATTCATTGGTTTTAGTTTCGATTCTAAAAAGAGATGAGTAAATAATTTTCT  
AGATCAGAAATACTACTTTTAACTACAAAAGCTTACGCTTTTTAACATTTTTTGATAAATAACA  
ACTATTGTTAATATTTGGCTGTCTATTGGTTTAACTAACAATTACAAAATTTTTCAATTTTTATAAT  
ATAAATTTAAATGAGAATATTAATAAAGTCATTCAATTATTAATAATTAGTGAATTCTTACCTTATCGA  
TGCGTCACAACCAAGTAACATTAGTTACTTGTGAAATTTTGGTTCATTATTAGCTGTTTGTTAAT  
AGTACAAATTATTACCGGTATTACATTAGCTATGCATTATAGTCCTAGTGAATGGAAGCTTTTAA  
CTCAATAGAGCATATAATGAGAGATGTTAATAACGGGTGATTAGTTCGTTATCTACATAGTAATA  
CAGCTTCTGCTTTCTTTTTCTTAGTGATTTACACATAGGAAGAGGTATATATTACGGATCATATA  
GAGCTCCTCGTACTTTAGTTTGAGCTATTGGTACTGTTATATTAATTAATGATGGCTATCGGTT  
TCCTAGGTTATGTTTTACCTTATGGACAGATGTCATTATGAGGTGCTACAGTTATTACTAATCTTA  
TTAGTGCTATACCTGAATAGGGCAAGATATTGTTGAATTCATTTGAGGTGGTTTTCTGTTAATA  
ATGCCACTTTAAACAGATTTTTGCATTACATTTGTATTGCCTTTTGTATTAGCTGCTTTAGTTTTA  
ATGCACTTAATTGCACTTCATGATACTGCTGGTTCAAGCAATCCTCTTGGTGTTTCAGGTAATTAC  
GATAGAATTACATTTGCTCCATATTTTTATTTAAAGATTTAATTACTATTTTTATATTTATTTTGTA  
TTAAGTGCTTTTGATTCTTTATGCCTAATGTTTTAGGGGATAGTGATAATTATATTATGGCTAATC  
CTATGCAAACCTCCTGCTGCTATTGTACCTGAATGATACTTATTACCTTTCTATGCTATTTTAAGATC  
TATACCTAATAAATTATTAGGTGTTATAGCGATGTTTAGTGCTATTTAGCTATTATGTTATTACCT  
GTTACAGATTTAGGTAGATCTAGAGGTTTACAATTTAGACCATTTAGTAAATAGCTTCTGAGTT  
TTTGTTGCTAATTTCTTAGTTTAAATGCAATTAGGTGCTAAACACGTTGAAGATCCATTTATATTAT  
TAGGTCAATTAAGTACTGTATTATACTTTAGTTATTTTGTTGCTATATTACCTTTAGCTAGTTACTT  
AGATAATAGTTTAACTGATTTATCTAATAAATCTGAATTATTTTAAATAAACTAACTAAATATAT  
TAAGATTATTATTTAATATATTTTCTATTTAAGATACTATTAATTTAGTATTTTGGGTTTTAGTTTA  
TAATTTATATTATATTATGCATTACCCTCCACCTTGCTTTGTAGTAAGCTAATCTGTTATTTCTTTA  
GTTTAAATGGTAGAACAAATGATCTTCTAATTCATTGGTTTTAGTTTGAATCTAAAAAGGAAATAAG  
AAATATATTCTTATTATTACTTATATAATAATTATTTCTTAAAAATATACATTTTGCAATTATAGCCGT  
TTAGCTGTATTAAATGTAAATGATATAAAATAGAATAAATATTTAAATTATTCCTATGTTATATT  
ATCCTATATTGCAACCATTATCAGAAGTTGTATTAATACTTGTACCTGCCTTATTAGCTGTAGCTT  
ATGTTACAGTTGCTGAAAGAAAACTATGGCTAGTATGCAAAGAAGATTAGGTCCTAATGCTGT

AGGTTACTATGGACTATTGCAAGCATTGCTGATGCCTTAAACCTTTTATTTAAAGAATATGTAG  
CTCCTACACAATCTAATATTGTTCTTTTCTTTTAGGTCCTGTAATAACTTTAATTTTGCATTATTA  
GGTTACGCTGTTATACCCTATGGTCCTGGTTCAGGGATAAGCGACATGAATTTAGGTATATTTTA  
CATGTTAGCTGTGTCATCTTTAGCTACATACGGTATTCTATTAGCTGGTTGAAGTGCGAATAGTA  
AATACGCTTTTCTAGGTTCTCTTAGAAGTACAGCTCAATTAATTAGTTATGAATTAATATTAAGTT  
CAGCTATATTAATAGTAATTATGATAACAGGAAATTTAAATTTAACTGTTTGTACTGAATCTCAAA  
GAGCTATTTGATTTATACTACCTTTATTTCTGTGTTTATAATATTTTTCATAGGATCTATAGCTGA  
GACAAATAGAGCTCCTTTTGATTTAGCCGAGGCTAACCTGCTAATCTGGTTTGGTCTGGTTATAT  
GTCACAAATTGCTAGGAAACCTTTTTATTTAAAAACAAAAGACAATTAGCAGGAACTTAATTT  
AACCTAATTAATAATTAGATAATTAACCTCTTCATAGACTAAACGTGACAATTTAATATATATA  
TATATTTATTTATATATATGATTAAATAAGATATAGTCAATCATCGGTGTGAATCGACTTAAAAAA  
AAAAGCACATGGGTAAACCCATCTCCCCTTATTAGGGGAATCAGAAGTTGTTAGTGGGTTTCAT  
GACAGAGCATGCTGCCGTAGTTTTCGTATTCTTCTTTTAGCTGAGTACGGTAGTATTGTACTAAT  
GTGTATTTTAACTAGTATATTATTTATTGGTGGTTACTTATTATTTGAAATATCCTATGTTTTACTG  
TGGTAAATTATATTTTCTTTGAATTATCTTTATAGACTGAGTAACATTTGTAGAGGTACAATCTTT  
ATACACTGATTTTTTAAATAATTCTATCATTGAAGGATTATTATATGGGTTTAACTAGGATTAAA  
AAGTTCTTTAATGATATTCACATTTATTTGAGCTAGAGCATCCTTCCCTAGAATACGATTTGATCA  
ACTAATGGGCTTCTGTTGAACAGTTTTATTACCTATTAATTTTGCAATTATTATATTAGTACCTTGT  
GTTTTATATAGTTTTAACTTATTACCTGTAAATATACCATTGTTCTAGCTCACACACCCGCCGCC  
CTACTGCCACAAGGCTACAGTACATATGAGGAGGGGAACTAAAGATCTAGAAGTATCCTAGTTA  
ATAATTACACTTAATAGTATACTAAATAGACCATCTATCATACTCGAGAATAGTGATAGTGTAAT  
TATACACTATTTTAACTGTATTCTACACTATTAGCATATTATTATCTTTATATGATAATAATTTTATA  
ACTTAATTTATTAGGTTACATTAACAAAAAATTCGTTAACTTTTTTCACCACTTTTAAATACAAAAT  
ACGAATTTTA

>YN735

ATAACAATTCTAAAGAACATAAAGAGTTATTAGATAAAAAATAATTCACCTATACAGTTAATAAAT  
CAACTTAAAGGGTATTTTTTCATAAATCCTTTATTAGCTTTAAGTTTAGCTATTACTATTTTCTCTTT  
TGCAGGTATTCCTCCTCTGTAGGGTTCTTTGCTAAACAGATGGTATTAAGCGCGGCTATTGATC  
AAGGTTATATCTTTTTATCTTTAGTTGCAATATTAAGTGTATAGGAGGGGTTTATTATTTAAA  
TATAATTAAGAAATGTTCTTTTATTCACCTGACTATAAATTAACGAAGAAATTAATAAATAC  
TATTAATGGTCAAATTATTAATAGAAACAATAAAATATTAATGTTGAATTTAATTATACAAATGT  
AGTTATGTCTAGTTCTGTGGCAATAACTATTTCTACTATTACATTAGTAGTTTTATTATTCATGTTT  
ATGAATAAAGAATGATTAAGTCTGGGTACTATATTGGTACAATCTTTATTTAGCTATTAATGAGTA  
GTATGACATTATTTATAGGGTTTGTATCTGTTATAGCTATTTTATTTTAGCCATTAATTTTATATTT  
GCTCCTCATAATCCTTATCAAGAAAAATATAGTATTTTCGAGTGTGGTTTCCATAGTTTTTTAGGG  
CAAAATAGAACACAATTCGGTATAAAATCTTTATTTTGCTTTAGTTTATTTACTTTTAGATTTAG  
AAATATTATTAACTTTCCCTTTCGCTCTTAGTGAGTATGTTAATGGTATTTATGGTCTTTTAGTTAC  
TTTAATTTTTATAGCTATAATAACTATAGGATTTATATTTGAATTAGGTAAAAGCGCTCTTAAATA  
GACAGCAGACAAAAATTATATATACCTAAATTGAACGTTAATTACCATACAGAGTATGTTGGAAT  
AGGTAAGGTTTCTAAGTAAAGTTATAGAGGCAGAAAACCAAAAAACCTACCAAAGGGTAGCTA  
ATGGGAAGCTATTAAAAATAAAGATGATAACCTATATATAGTATAGTTACTATATATTTACTATA  
ACTAGGATTATTATATATATATATATTATCTTATTGTATATTAAGATTATTATTATTATAAGGTATA  
ATTAATATAGTATCTTATTGTATAAGAATATAATATATTAACCTATAATTAATTTTATTTTAAATTT  
TTAATTATAATTTTTTTTTTATATCTAGATGCTTACACATCTACAGATGTAGAAGAGAACAAAATAT

TGTTGTTATAGTAGTGGATGATATAGAAAAATATTTTTATATTATTTATTTTTGTTAGGTAGCTTTT  
GAAGTGTGTTGATAGAGAGGATATATGGACGGTAGGAGGGTATTCATTTTAATGAACAGTGGATA  
GTTTAAATTAACCTAGTTATAGTTTATGAATTTAAATTATAATTATATTAATGTAGGTTATGATAGA  
ATTATGTATTGATCCTTAAGAGTTAAGAGAGATACGCCCACGTATAATACATATTGGTTTAGGGT  
TGAGTATATATACTTAAGAGTTAAGAATATATATATACAATATATAATAAATATAGTAATATATTA  
ATGGTATGGACTTAACCAGGTTTATATATTATCATTGATAAACATTAATTATAATTTTTCTATTTA  
TTATTATTATTATACTGTGAGATTAATAATTATTTAAATATAATATTACATAGTACGTGATATTTGG  
GGATTTTATCTTATTAATTGGCAATTAATGATTCTAATCAAATTTTATTCTCTTTAGTTTAATGGTA  
GAACAATGATCTTCTAATTCATTGGTTTTAGTTTCGATTCTAAAAAGAGATGAGTAAATAATTTTCT  
AGATCAGAAATACTACTTTTAACTACAAAAAGCTTACGCTTTTAAACATTTTTTTGATAAATAACA  
ACTATTGTTAATATTTGGCTGTCTATTGGTTTAACTACAATTACAAAATTTTTTCAATTTTTATAAT  
ATAAATTTAAATGAGAATATTTAAAAAGTCATTCATTATTTAAATTAGTGAATTCTTACCTTATCGA  
TGCGTCACAACCAAGTAACATTAGTTACTTGTGAAATTTTGGTTCATTATTAGCTGTTTGTTAAT  
AGTACAAATTATTACCGGTATTACATTAGCTATGCATTATAGTCCTAGTGAATGGAAGCTTTTAA  
CTCAATAGAGCATATAATGAGAGATGTTAATAACGGGTGATTAGTTCGTTATCTACATAGTAATA  
CAGCTTCTGCTTTCTTTTCTTAGTGTATTTACACATAGGAAGAGGTATATATTACGGATCATATA  
GAGCTCCTCGTACTTTAGTTTGAGCTATTGGTACTGTTATATTAATTAATGATGGCTATCGGTT  
TCCTAGGTTATGTTTTACCTTATGGACAGATGTCATTATGAGGTGCTACAGTTATTACTAATCTTA  
TTAGTGCTATACCTGAATAGGGCAAGATATTGTTGAATTCATTTGAGGTGGTTTTTCTGTTAATA  
ATGCCACTTTAAACAGATTTTTTGCAATTACATTTGTATTGCCTTTGTATTAGCTGCTTTAGTTTAA  
ATGCACTTAATTGCACTTCATGATACTGCTGGTTCAAGCAATCCTCTGGTGTTTCAGGTAATTAC  
GATAGAATTACATTTGCTCCATATTTTTATTTAAAGATTTAATTACTATTTTTATATTTATTTTTGTA  
TTAAGTGCTTTGTATTCTTTATGCCTAATGTTTTAGGGGATAGTGATAATTATATTATGGCTAATC  
CTATGCAAACCTCCTGCTGCTATTGTACCTGAATGATACTTATTACCTTTCTATGCTATTTTAAGATC  
TATACCTAATAAATTATTAGGTGTTATAGCGATGTTTAGTGCTATTTTAGCTATTATGTTATTACCT  
GTTACAGATTTAGGTAGATCTAGAGGTTTACAATTTAGACCATTTAGTAAAATAGCTTTCTGAGTT  
TTTGTTGCTAATTTCTTAGTTTTAATGCAATTAGGTGCTAAACACGTTGAAGATCCATTTATATTAT  
TAGGTCAATTAAGTACTGTATTATACTTTAGTTATTTTTGTTGCTATATTACCTTTAGCTAGTTACTT  
AGATAATAGTTTAACTGATTTATCTAATAAATCTGAATTATTTTTAAATAAACTAACTAAATATAT  
TAAGATTATTATTTAATATATTTTCTATTTAAGATACTATTAATTTAGTATTTTGGGTTTTAGTTTA  
TAATTTATATTATATTATGCATTACCCTCCACCTTGCTTTGTAGTAAGCTAATCTGTTATTTCTTTA  
GTTTAATGGTAGAACAATGATCTTCTAATTCATTGGTTTTAGTTTGAATCTAAAAAGGAAATAAG  
AAATATATTCTTATTATTACTTATATAATAATTATTTCTTAAAAATATACATTTTGCAATTATAGCCGT  
TTAGCTGTATTAAATGTAAATGATATAAAATAGAATAAATATTTAAATTATTCCTATGTTATATT  
ATCCTATATTGCAACCATTATCAGAAGTTGTATTAATACTTGTACCTGCCTTATTAGCTGTAGCTT  
ATGTTACAGTTGCTGAAAGAAAACTATGGCTAGTATGCAAAGAAGATTAGGTCCTAATGCTGT  
AGGTTACTATGGACTATTGCAAGCATTTGCTGATGCCTTAAACCTTTTATTAAGAATATGTAG  
CTCCTACACAATCTAATATTGTTCTTTTCTTTTAGGTCCTGTAATAACTTTAATTTTTGCATTATTA  
GGTTACGCTGTTATACCCTATGGTCCTGGTTCAGGATAAGCGACATGAATTTAGGTATATTTTA  
CATGTTAGCTGTGTCATCTTTAGCTACATACGGTATTCTATTAGCTGGTTGAAGTGCGAATAGTA  
AATACGCTTTTCTAGGTTCTCTTAGAAGTACAGCTCAATTAATTAGTTATGAATTAATTAAGTT  
CAGCTATATTAATAGTAATTATGATAACAGGAAATTTAAATTTAACTGTTTGTACTGAATCTCAAA  
GAGCTATTTGATTTATACTACCTTTATTTCTGTGTTTATAATATTTTTCATAGGATCTATAGCTGA  
GACAAATAGAGCTCCTTTTGATTTAGCCGAGGCTAACCTGCTAATCTGGTTTGGTCTGGTTATAT

GTCACAAATTGCTAGGAAACCTTTTTATTTTAAAAACAAAAGACAATTAGCAGGAACTTAATTT  
AACCTAATTAATAATATTAGATAATTAACCTCTTCATAGACTAAACGTGACAATTTAATATATATA  
TATATTTATTTATATATATGATTAAATAAGATATAGTCAATCATCGGTGTGAATCGACTTAAAAAA  
AAAAGCACATGGGTAAACCCATCTCCCCTTATTAGGGGAATCAGAACTTGTTAGTGGGTTTCAT  
GACAGAGCATGCTGCCGTAGTTTTCGTATTCTTCTTTTAGCTGAGTACGGTAGTATTGTACTAAT  
GTGTATTTTAACTAGTATATTATTTATTGGTGGTTACTTATTATTTGAAATATCCTATGTTTTACTG  
TGGTAAATTATATTTTCTTTGAATTATTCTTTATAGACTGAGTAACATTTGTAGAGGTACAATCTTT  
ATACACTGATTTTTTAAATAATTCTATCATTGAAGGATTATTATATGGGTTTAATCTAGGATTAAA  
AAGTTCTTTAATGATATTCACATTTATTTGAGCTAGAGCATCCTTCCCTAGAATACGATTTGATCA  
ACTAATGGGCTTCTGTTGAACAGTTTTATTACCTATTAATTTTGCAATTATTATATTAGTACCTTGT  
GTTTTATATAGTTTTAACTTATTACCTGTAAATATACCATTGTTCTAGCTCACACACCCGCCGCC  
CTACTGCCACAAGGCTACAGTACATATGAGGAGGGGAACCTAAAGATCTAGAACTATCCTAGTTA  
ATAATTACACTTAATAGTATACTAAATAGACCATCTATCATACTCGAGAATAGTGATAGTGTAAT  
TATACACTATTTTAACTGTATTCTACACTATTAGCATATTATTATCTTTATATGATAATAATTTTATA  
ACTTAATTTATTAGGTTACATTAACAAAAAATTCGTTAACTTTTTTCACCACTTTTTAATACAAAAT  
ACGAATTA

>YN745

ATAACAATTCTAAAGAACATAAAGAGTTATTAGATAAAAAATAATTCACCTATACAGTTAATAAAT  
CAACTTAAAGGGTATTTTTTCATAAATCCTTTATTAGCTTTAAGTTAGCTATTACTATTTTCTCTTT  
TGCAGGTATTCCTCCTCTTGTAGGGTCTTTGCTAAACAGATGGTATTAAGCGCGGCTATTGATC  
AAGGTTATATCTTTTATCTTTAGTTGCAATATTAAGTGTATAGGAGGGGTTTATTATTTAAA  
TATAATTAAGAAATGTTCTTTTATTCACCTGACTATAAATTAACGAAGAAATTAATAAATAC  
TATTAATGGTCAAATTATTAATAGAAACAATAAAATATTAATGTTGAATTTAATTATACAAATGT  
AGTTATGTCTAGTTCTGTGGCAATAACTATTTCTACTATTACATTAGTAGTTTTATTATTCATGTTT  
ATGAATAAAGAATGATTAAGTCTGGGTACTATATTGGTACAATCTTTATTTAGCTATTAATGAGTA  
GTATGACATTATTTATAGGGTTTGTATCTGTTATAGCTATTTTATTTTAGCCATTAATTTATATTT  
GCTCCTCATAATCCTTATCAAGAAAAATATAGTATTTTCGAGTGTGGTTTCCATAGTTTTTTAGGG  
CAAAATAGAACACAATTCGGTATAAAATCTTTATTTTGCTTTAGTTTATTTACTTTTAGATTTAG  
AAATATTATTAACCTTTCCCTTTGCTCTTAGTGAGTATGTTAATGGTATTTATGGTCTTTTAGTTAC  
TTTAATTTTTATAGCTATAATAACTATAGGATTTATATTTGAATTAGGTAAAAGCGCTCTTAAATA  
GACAGCAGACAAAAATTATATACCTAAATTGAACGTTAATTACCATACAGAGTATGTTGGAAT  
AGGTAAGGTTTCTAAGTAAAGTTATAGAGGCAGAAAACCAAAAAACCTACCAAAGGGTAGCTA  
ATGGGAAGCTATTAATAAAAGATGATAACCTATATATAGTATAGTTACTATATATTTACTATA  
ACTAGGATTATTATATATATATATATTATCTTATTGTATATTAAGATTATTATTATAAGGTATA  
ATTAATATAGTATCTTATTGTATAAGAATATAATATATTAACCTATAATTAATTTATTTTTAATTT  
TTAATTATAATTTTTTTTTATATCTAGATGCTTACACATCTACAGATGTAGAAGAGAACAAAATAT  
TGTTGTTATAGTAGTGATATAGAAAAATATTTTATATTATTTATTTTGTAGGTAGCTTTT  
GAAGTGTGATAGAGAGGATATATGGACGGTAGGAGGTATTCATTTAATGAACAGTGGATA  
GTTTAAATTAACCTAGTTATAGTTTATGAATTTAAATTATAATTATATTAATGTAGGTATGATAGA  
ATTATGTATTGATCCTTAAGAGTTAAGAGAGATACGCCACGTATAATACATATTGGTTAGGGT  
TGAGTATATATACTTAAGAGTTAAGAATATATATATACAATATATAATAAATATAGTAATATATTA  
ATGGTATGGACTTAACCAGGTTTATATATTATCATTTGATAAACATTAATTATAATTTTTCTATTTA  
TTATTATTATACTGTGAGATTAATAATTATTAATAATATTACATAGTACGTGATATTTGG  
GGATTTTATCTTATTAATTGGCAATTAATGATTCTAATCAAATTTTATTCTCTTAGTTTAATGGTA

GAACAATGATCTTCTAATTCATTGGTTTTAGTTTCGATTCTAAAAAGAGATGAGTAAATAATTTTCT  
AGATCAGAAATACTACTTTTAACTACAAAAAGCTTACGCTTTTAAACATTTTTTGATAAATAACA  
ACTATTGTTAATATTTGGCTGTCTATTGGTTTAACTAACAATTACAAAATTTTTCAATTTTTATAAT  
ATAAATTTAAATGAGAATATTA AAAAGTCATTATTATTA AAAATTAGTGAATTCTTACCTTATCGA  
TGCGTCACAACCAAGTAACATTAGTTACTTGTGAAATTTTGGTTCATTATTAGCTGTTTGTTAAT  
AGTACAAATTATTACCGGTATTACATTAGCTATGCATTATAGTCCTAGTGAATGGAAGCTTTTAA  
CTCAATAGAGCATATAATGAGAGATGTTAATAACGGGTGATTAGTTCGTTATCTACATAGTAATA  
CAGCTTCTGCTTTCTTTTTCTTAGTGATTTACACATAGGAAGAGGTATATATTACGGATCATATA  
GAGCTCCTCGTACTTTAGTTTGAGCTATTGGTACTGTTATATTAATTAATGATGGCTATCGGT  
TCCTAGGTTATGTTTTACCTTATGGACAGATGTCATTATGAGGTGCTACAGTTATTACTAATCTTA  
TTAGTGCTATACCTGAATAGGGCAAGATATTGTTGAATTCATTTGAGGTGGTTTTCTGTTAATA  
ATGCCACTTTAAACAGATTTTTGCATTACATTTGTATTGCCTTTGTATTAGCTGCTTTAGTTTAA  
ATGCACTTAATTGCACTTCATGATACTGCTGGTTCAAGCAATCCTCTGGTGTTTCAGGTAATTAC  
GATAGAATTACATTTGCTCCATATTTTTATTTAAAGATTTAATTACTATTTTTATTTATTTTTGTA  
TTAAGTGCTTTTGATTCTTTATGCCTAATGTTTTAGGGGATAGTGATAATTATATTATGGCTAATC  
CTATGCAAACCTCTGCTGCTATTGTACCTGAATGATACTTATTACCTTTCTATGCTATTTTAAGATC  
TATACCTAATAAATTATTAGGTGTTATAGCGATGTTTAGTGCTATTTTAGCTATTATGTTATTACCT  
GTTACAGATTTAGGTAGATCTAGAGGTTTACAATTTAGACCATTTAGTAAAATAGCTTTCTGAGTT  
TTTGTTGCTAATTTCTTAGTTTTAATGCAATTAGGTGCTAAACACGTTGAAGATCCATTTATATTAT  
TAGGTCAATTAAGTACTGTATTATACTTTAGTTATTTTTGTTGCTATATTACCTTTAGCTAGTTACTT  
AGATAATAGTTTAACTGATTTATCTAATAAATCTGAATTATTTTAAATAAACTAACTAAATATAT  
TAAGATTATTATTTAATATATTTTCTATTTAAGATACTATTAATTTAGTATTTTGGGTTTTCAGTTTA  
TAATTTATATTATATTATGCATTACCTCCACCTTGCTTTGTAGTAAGCTAATCTGTTATTTCTTTA  
GTTTAATGGTAGAACAATGATCTTCTAATTCATTGGTTTTAGTTTCGAATCTAAAAAGGAAATAAG  
AAATATATTCTTATTATTACTTATATAATAATTATTTCTTAAAAATATACATTTTGCATTATAGCCGT  
TTAGCTGTATTA AAAATGTAAAATGATATA AAAATAGAATAAATATTTAAATTATTCCTATGTTATATT  
ATCCTATATTGCAACCATTATCAGAAGTTGTATTAATACTTGTACCTGCCTTATTAGCTGTAGCTT  
ATGTTACAGTTGCTGAAAGAAAACTATGGCTAGTATGCAAAGAAGATTAGGTCCTAATGCTGT  
AGGTTACTATGGACTATTGCAAGCATTTGCTGATGCCTTAAACTTTTATTA AAAAGAATATGTAG  
CTCCTACACAATCTAATATTGTTCTTTCTTTTAGGTCCTGTAATAACTTTAATTTTTGCATTATTA  
GGTTACGCTGTTATACCCTATGGTCCTGGTTCAGGGATAAGCGACATGAATTTAGGTATATTTTA  
CATGTTAGCTGTGTCATCTTTAGCTACATACGGTATTCTATTAGCTGGTTGAAGTGCGAATAGTA  
AATACGCTTTTCTAGGTTCTCTTAGAAGTACAGCTCAATTAATTAGTTATGAATTAATTAAGTT  
CAGCTATATTAATAGTAATTATGATAACAGGAAATTTAAATTTAACTGTTTGTACTGAATCTCAAA  
GAGCTATTTGATTTATACTACCTTTATTTCTGTGTTATAATATTTTTCATAGGATCTATAGCTGA  
GACAAATAGAGCTCCTTTTGATTTAGCCGAGGCTAACCTGCTAATCTGGTTTGGTCTGGTTATAT  
GTCACAAATTGCTAGGAAACCTTTTTATTTTAAAAACAAAAGACAATTAGCAGGAAACTTAATTT  
AACCTAATTA AAAATATTAGATAATTAACTCTTCATAGACTAAACGTGACAATTTAATATATATA  
TATATTTATTTATATATATGATTAAATAAGATATAGTCAATCATCGGTGTGAATCGACTTAAAAAA  
AAAAGCACATGGGTAAACCCATCTCCCTTATTAGGGGAATCAGAACTTGTTAGTGGGTTTCAT  
GACAGAGCATGCTGCCGTAGTTTTCGTATTCTCTTTTTAGCTGAGTACGGTAGTATTGTACTAAT  
GTGTATTTTAACTAGTATATTATTTATTGGTGGTTACTTATTATTTGAAATATCCTATGTTTTTACTG  
TGGTAAATTATATTTCTTTGAATTATTCTTTATAGACTGAGTAACATTTGTAGAGGTACAATCTTT  
ATACACTGATTTTTTAAATAATTCTATCATTGAAGGATTATTATATGGGTTAATCTAGGATTA

AAGTTCTTTAATGATATTCACATTTATTTGAGCTAGAGCATCCTTCCCTAGAATACGATTTGATCA  
ACTAATGGGCTTCTGTTGAACAGTTTTATTACCTATTAATTTTGCAATTATTATATTAGTACCTTGT  
GTTTTATATAGTTTTAACTTATTACCTGTAAATATACCATTGTTCTAGCTCACACACCCGCCGCC  
CTACTGCCACAAGGCTACAGTACATATGAGGAGGGGAAGTAAAGATCTAGAACTATCCTAGTTA  
ATAATTACACTTAATAGTATACTAAATAGACCATCTATCATACTCGAGAATAGTGATAGTGTAAT  
TATACACTATTTTAACTGTATTCTACACTATTAGCATATTATTATCTTTATATGATAATAATTTTATA  
ACTTAATTTATTAGGTTACATTAACAAAAAATTCGTTAACTTTTTTCACCACTTTTAAATACAAAAT  
ACGAATTTTA

>Z-2

ATAACAATTCTAAAGAACATAAAGAGTTATTAGATAAAAAATAATTCACCTATACAGTTAATAAAT  
CAACTTAAAGGGTATTTTTTCATAAATCCTTTATTAGCTTTAAGTTTAGCTATTACTATTTCTCTTT  
TGCAGGTATTCTCCTCTTGTAGGGTCTTTGCTAAACAGATGGTATTAAGCGCGGCTATTGATC  
AAGGTTATATCTTTTTATCTTTAGTTGCAATATTAAGTGTATAGGAGGGGTTTATTATTTAAA  
TATAATTAAGAAATGTTCTTTTATTCACCTGACTATAAATTAACGAAGAAATTAATAAATAC  
TATTAATGGTCAAATTATTAATAGAAACAATAAATATTAATGTTGAATTTAATTATACAAATGT  
AGTTATGTCTAGTTCTGTGGCAATAACTATTTCTACTATTACATTAGTAGTTTTATTATTCATGTTT  
ATGAATAAAGAATGATTAAGTCTGGGTACTATATTGGTACAATCTTTATTTAGCTATTAATGAGTA  
GTATGACATTATTTATAGGGTTGTATCTGTTATAGCTATTTTATTTTAGCCATTAATTTATATTT  
GCTCCTCATAATCCTTATCAAGAAAAATATAGTATTTTCGAGTGTGGTTTCCATAGTTTTTTAGGG  
CAAAATAGAACACAATTCGGTATAAAATTCCTTTATTTTGTCTTAGTTTATTTACTTTTAGATTTAG  
AAATATTATTAACTTTCCCTTCGCTCTTAGTGAGTATGTTAATGGTATTTATGGTCTTTTAGTTAC  
TTTAATTTTTATAGCTATAATAACTATAGGATTTATATTTGAATTAGGTAAGCGCTCTTAAATA  
GACAGCAGACAAAAATTATATATACCTAAATTGAACGTTAATTACCATACAGAGTATGTTGGAAT  
AGGTAAGGTTTCTAAGTAAAGTTATAGAGGCAGAAAACCAAAAAACCTACCAAAGGGTAGCTA  
ATGGGAAGCTATTAATAAATAAAGATGATAACCTATATATAGTATAGTTACTATATATTTACTATA  
ACTAGGATTATTATATATATATATATTATCTTATTGTATATTAAGATTATTATTATAAGGTATA  
ATTAATATAGTATCTTATTGTATAAGAATATAATATATTAACCTATAATTAATTTTATTTTTTAATTT  
TTAATTATAATTTTTTTTTATATCTAGATGCTTACACATCTACAGATGTAGAAGAGAACAAAATAT  
TGTTGTTATAGTAGTGGATGATATAGAAAAATATTTTTATATTATTTATTTTGTAGGTAGCTTTT  
GAAGTGTGTTGATAGAGAGGATATATGGACGGTAGGAGGGTATTCATTTAATGAACAGTGGATA  
GTTTAAATTAACCTAGTTATAGTTTATGAATTTAAATTATAATTATATTAATGTAGGTTATGATAGA  
ATTATGTATTGATCCTTAAGAGTTAAGAGAGATACGCCACGTATAATACATATTGGTTTAGGGT  
TGAGTATATATACTTAAGAGTTAAGAATATATATATACAATATATAATAAATATAGTAATATATTA  
ATGGTATGGACTTAACCAGGTTTATATATTATCATTTGATAAACATTAATTATAATTTTTCTATTTA  
TTATTATTATTATACTGTGAGATTAATAATTATTAATAATATAATATTACATAGTACGTGATATTTGG  
GGATTTTATCTTATTAATTGGCAATTAATGATTCTAATCAAATTTTATTCTCTTAGTTAATGGTA  
GAACAATGATCTTCTAATTCATTGGTTTTAGTTTCGATTCTAAAAAGAGATGAGTAAATAATTTTCT  
AGATCAGAAATACTACTTTTAACTACAAAAAGCTTACGCTTTTAAACATTTTTTTGATAAATAACA  
ACTATTGTTAATATTTGGCTGTCTATTGGTTTAACTAACAATTACAAAATTTTTCAATTTTTATAAT  
ATAAATTTAAATGAGAATATTAATAAAGTCATTCATTATTAATAAATTAGTGAATCTTACCTTATCGA  
TGCGTCACAACCAAGTAACATTAGTTACTTGTGAAATTTTGGTTCATTATTAGCTGTTTGTAAAT  
AGTACAAATTATTACCGGTATTACATTAGCTATGCATTATAGTCCTAGTGTAATGGAAGCTTTTAA  
CTCAATAGAGCATATAATGAGAGATGTTAATAACGGGTGATTAGTTCGTTATCTACATAGTAATA  
CAGCTTCTGCTTTCTTTTCTTAGTGTATTTACACATAGGAAGAGGTATATATTACGGATCATATA

GAGCTCCTCGTACTTTAGTTTGAGCTATTGGTACTGTTATATTAATATTAATGATGGCTATCGGTT  
TCCTAGGTTATGTTTTACCTTATGGACAGATGTCATTATGAGGTGCTACAGTTATTACTAATCTTA  
TTAGTGCTATACCTGAATAGGGCAAGATATTGTTGAATTCATTTGAGGTGGTTTTCTGTAAATA  
ATGCCACTTTAAACAGATTTTTGCATTACATTTGTATTGCCTTTGTATTAGCTGCTTTAGTTTTA  
ATGCACTTAATTGCACTTCATGATACTGCTGGTTCAAGCAATCCTCTTGGTGTTCAGGTAATTAC  
GATAGAATTACATTTGCTCCATATTTTTATTTAAAGATTTAATTACTATTTTTATATTTATTTTGT  
TTAAGTGCTTTTGTATTCTTTATGCCTAATGTTTTAGGGGATAGTGATAATTATATTATGGCTAATC  
CTATGCCAACTCCTGCTGCTATTGTACCTGAATGATACTTATTACCTTTCTATGCTATTTAAGATC  
TATACCTAATAAATTATTAGGTGTTATAGCGATGTTTAGTGCTATTTTAGCTATTATGTTATTACCT  
GTTACAGATTTAGGTAGATCTAGAGGTTTACAATTTAGACCATTTAGTAAAATAGCTTTCTGAGTT  
TTTGTTGCTAATTTCTTAGTTTTAATGCAATTAGGTGCTAAACACGTTGAAGATCCATTTATATTAT  
TAGGTCAATTAAGTACTGTATTATACTTTAGTTATTTTGTGCTATATTACCTTTAGCTAGTTACTT  
AGATAATAGTTTAACTGATTTATCTAATAAATCTGAATTATTTTAAATAAAACTAACTAAATATAT  
TAAGATTATTATTTAATATATTTTCTATTTAAGATACTATTAATTTAGTATTTTGGGTTTTCAGTTTA  
TAATTTATATTATATTATGCATTACCCTCCACCTTGCTTTGTAGTAAGCTAATCTGTTATTTCTTTA  
GTTAATGGTAGAACAATGATCTTCTAATTCATTGGTTTTAGTTCGAATCTAAAAAGGAAATAAG  
AAATATATTCTTATTATTACTTATATAATAATTATTTCTTAAAAATATACATTTTGCATTATAGCCGT  
TTAGCTGTATTAATAATGTAAATGATATAAAATAGAATAAATATTTAAATTATTCCTATGTTATATT  
ATCCTATATTGCAACCATTATCAGAAGTTGTATTAATACTTGTACCTGCCTTATTAGCTGTAGCTT  
ATGTTACAGTTGCTGAAAGAAAAACTATGGCTAGTATGCAAAGAAGATTAGGTCCTAATGCTGT  
AGGTTACTATGGACTATTGCAAGCATTTGCTGATGCCTTAAACTTTTTATTAAGAATATGTAG  
CTCCTACACAATCTAATATTGTTCTTTTCTTTTAGGTCCTGTAATAACTTTAATTTTGCATTATTA  
GGTTACGCTGTTATACCCTATGGTCCTGGTTCAGGGATAAGCGACATGAATTTAGGTATATTTA  
CATGTTAGCTGTGTCATCTTTAGCTACATACGGTATTCTATTAGCTGGTTGAAGTGCGAATAGTA  
AATACGCTTTTCTAGGTTCTCTTAGAAGTACAGCTCAATTAATTAGTTATGAATTAATATTAAGTT  
CAGCTATATTAATAGTAATTATGATAACAGGAAATTTAAATTTAACTGTTTGTACTGAATCTCAAA  
GAGCTATTTGATTTATACTACCTTTATTTCTGTGTTTATAATTTTTTCATAGGATCTATAGCTGA  
GACAAATAGAGCTCCTTTTGATTTAGCCGAGGCTAACCTGCTAATCTGGTTTGGTCTGGTTATAT  
GTCACAAATTGCTAGGAAACCTTTTTATTTAAAAACAAAAGACAATTAGCAGGAACTTAATTT  
AACCTAATTAATAATATTAGATAATTAACTCTTCATAGACTAAACGTGACAATTTAATATATATA  
TATATTTATTTATATATATGATTAATAAGATATAGTCAATCATCGGTGTGAATCGACTTAAAAA  
AAAAGCACATGGGTAAACCCATCTCCCCTTATTAGGGGAATCAGAACTTGTTAGTGGGTTTCAT  
GACAGAGCATGCTGCCGTAGTTTTCGTATTCTTCTTTTAGCTGAGTACGGTAGTATTGTACTAAT  
GTGTATTTTAACTAGTATATTATTTATTGGTGGTTACTTATTATTTGAAATATCCTATGTTTTACTG  
TGGTAAATTATTTTTCTTTGAATTATTCTTTATAGACTGAGTAACATTTGTAGAGGTACAATCTTT  
ATACACTGATTTTTTAAATAATTCTATCATTGAAGGATTATTATATGGGTTTAACTAGGATTA  
AAGTTCTTTAATGATATTCACATTTATTTGAGCTAGAGCATCCTTCCCTAGAATACGATTTGATCA  
ACTAATGGGCTTCTGTTGAACAGTTTTATTACCTATTAATTTTGCAATTATTATATTAGTACCTTGT  
GTTTTATATAGTTTTAACTTATTACCTGTAAATATACCATTGTTCTAGCTCACACACCCGCCGCC  
CTACTGCCACAAGGCTACAGTACATATGAGGAGGGGAACTAAAGATCTAGAACTATCCTAGTTA  
ATAATTACACTTAATAGTATACTAAATAGACCATCTATCATACTCGAGAATAGTGATAGTGTAAT  
TATACACTATTTTAACTGTATTCTACACTATTAGCATATTATTATCTTTATATGATAATAATTTATA  
ACTTAATTTATTAGGTTACATTAACAAAAAATTCGTTAACTTTTTTCACCACTTTTAAATACAAAAT  
ACGAATTTA
