# Supplementary material for: ABCC Transporter Gene MoABC-R1 Is Associated with Pyraclostrobin Tolerance in Magnaporthe oryzae
Source: MDPI journal article supplement (doi:10.3390/jof9090917), 2023-09-11
Supplement: s1 [file s1]

|          | 1                 | 10               | 20               | 30             | 40 | 50 | 60 |
|----------|-------------------|------------------|------------------|----------------|----|----|----|
| 1_1896   | MVREDVQDSHLEGSSNV | SACTSTFHLEDSSFES | IDKEFLYSHTMPGNKH | DSMQPHRRPES    |    |    |    |
| 2_4785   | MVREDVQDSHLEGSSNV | SACTSTFHLEDSSFES | IDKEFLYSHTMPGNKH | DSMQPHRRPES    |    |    |    |
| 3_3653   | MVREDVQDSHLEGSSNV | SACTSTFHLEDSSFES | IDKEFLYSHTMPGNKH | DSMQPHRRPES    |    |    |    |
| 4_8157   | MVREDVQDSHLEGSSNV | SACTSTFHLEDSSFES | IDKEFLYSHTMPGNKH | DSMQPHRRPES    |    |    |    |
| 5_752    | MVREDVQDSHLEGSSNV | SACTSTFHLEDSSFES | IDKEFLYSHTMPGNKH | DSMQPHRRPES    |    |    |    |
| 6_8853   | MVREDVQDSHLEGSSNV | SACTSTFHLEDSSFES | IDKEFLYSHTMPGNKH | DSMQPHRRPES    |    |    |    |
| 7_4015   | MIVAFKYGPLMTLVIT  | ASVPIAMFIMRAISQ  | MLEKAIRAQKEKQAV  | ATKLSAAAITGIDL |    |    |    |
| 8_2020   | MVREDVQDSHLEGSSNV | SACTSTFHLEDSSFES | IDKEFLYSHTMPGNKH | DSMQPHRRPES    |    |    |    |
| 9_1829   | MVREDVQDSHLEGSSNV | SACTSTFHLEDSSFES | IDKEFLYSHTMPGNKH | DSMQPHRRPES    |    |    |    |
| 10_6452  | MVREDVQDSHLEGSSNV | SACTSTFHLEDSSFES | IDKEFLYSHTMPGNKH | DSMQPHRRPES    |    |    |    |
| 11_8627  | MVREDVQDSHLEGSSNV | SACTSTFHLEDSSFES | IDKEFLYSHTMPGNKH | DSMQPHRRPES    |    |    |    |
| 12_6118  | MVREDVQDSHLEGSSNV | SACTSTFHLEDSSFES | IDKEFLYSHTMPGNKH | DSMQPHRRPES    |    |    |    |
| 13_2688  | MVREDVQDSHLEGSSNV | SACTSTFHLEDSSFES | IDKEFLYSHTMPGNKH | DSMQPHRRPES    |    |    |    |
| 14_6406  | MVREDVQDSHLEGSSNV | SACTSTFHLEDSSFES | IDKEFLYSHTMPGNKH | DSMQPHRRPES    |    |    |    |
| 15_9419  | MVREDVQDSHLEGSSNV | SACTSTFHLEDSSFES | IDKEFLYSHTMPGNKH | DSMQPHRRPES    |    |    |    |
| 16_8507  | MVREDVQDSHLEGSSNV | SACTSTFHLEDSSFES | IDKEFLYSHTMPGNKH | DSMQPHRRPES    |    |    |    |
| 17_5884  | MVREDVQDSHLEGSSNV | SACTSTFHLEDSSFES | IDKEFLYSHTMPGNKH | DSMQPHRRPES    |    |    |    |
| 18_2670  | MVREDVQDSHLEGSSNV | SACTSTFHLEDSSFES | IDKEFLYSHTMPGNKH | DSMQPHRRPES    |    |    |    |
| 19_5172  | MVREDVQDSHLEGSSNV | SACTSTFHLEDSSFES | IDKEFLYSHTMPGNKH | DSMQPHRRPES    |    |    |    |
| 20_8057  | MVREDVQDSHLEGSSNV | SACTSTFHLEDSSFES | IDKEFLYSHTMPGNKH | DSMQPHRRPES    |    |    |    |
| 21_4920  | MTFKPGKMTFLVGRS   | GSGKSTITNLLVKFY  | EPLSGEILLDEHPL   | QTLNSEWVRKNVTL | VQ |    |    |
| 22_6393  | MVREDVQDSHLEGSSNV | SACTSTFHLEDSSFES | IDKEFLYSHTMPGNKH | DSMQPHRRPES    |    |    |    |
| 23_8263  | MVREDVQDSHLEGSSNV | SACTSTFHLEDSSFES | IDKEFLYSHTMPGNKH | DSMQPHRRPES    |    |    |    |
| 24_8248  | MVREDVQDSHLEGSSNV | SACTSTFHLEDSSFES | IDKEFLYSHTMPGNKH | DSMQPHRRPES    |    |    |    |
| 25_6733  | MVREDVQDSHLEGSSNV | SACTSTFHLEDSSFES | IDKEFLYSHTMPGNKH | DSMQPHRRPES    |    |    |    |
| 26_2277  | MVREDVQDSHLEGSSNV | SACTSTFHLEDSSFES | IDKEFLYSHTMPGNKH | DSMQPHRRPES    |    |    |    |
| 27_2623  | MVREDVQDSHLEGSSNV | SACTSTFHLEDSSFES | IDKEFLYSHTMPGNKH | DSMQPHRRPES    |    |    |    |
| 28_7413  | MVREDVQDSHLEGSSNV | SACTSTFHLEDSSFES | IDKEFLYSHTMPGNKH | DSMQPHRRPES    |    |    |    |
| 29_8980  | MVREDVQDSHLEGSSNV | SACTSTFHLEDSSFES | IDKEFLYSHTMPGNKH | DSMQPHRRPES    |    |    |    |
| 30_8706  | MVREDVQDSHLEGSSNV | SACTSTFHLEDSSFES | IDKEFLYSHTMPGNKH | DSMQPHRRPES    |    |    |    |
| 31_6378  | MVREDVQDSHLEGSSNV | SACTSTFHLEDSSFES | IDKEFLYSHTMPGNKH | DSMQPHRRPES    |    |    |    |
| 32_4679  | MVREDVQDSHLEGSSNV | SACTSTFHLEDSSFES | IDKEFLYSHTMPGNKH | DSMQPHRRPES    |    |    |    |
| 33_2437  | MVREDVQDSHLEGSSNV | SACTSTFHLEDSSFES | IDKEFLYSHTMPGNKH | DSMQPHRRPES    |    |    |    |
| 34_9700  | MVREDVQDSHLEGSSNV | SACTSTFHLEDSSFES | IDKEFLYSHTMPGNKH | DSMQPHRRPES    |    |    |    |
| 35_10218 | MVREDVQDSHLEGSSNV | SACTSTFHLEDSSFES | IDKEFLYSHTMPGNKH | DSMQPHRRPES    |    |    |    |
| 36_2652  | MVREDVQDSHLEGSSNV | SACTSTFHLEDSSFES | IDKEFLYSHTMPGNKH | DSMQPHRRPES    |    |    |    |
| 37_5779  | MVREDVQDSHLEGSSNV | SACTSTFHLEDSSFES | IDKEFLYSHTMPGNKH | DSMQPHRRPES    |    |    |    |
| 38_654   | MVREDVQDSHLEGSSNV | SACTSTFHLEDSSFES | IDKEFLYSHTMPGNKH | DSMQPHRRPES    |    |    |    |
| 39_4879  | MVREDVQDSHLEGSSNV | SACTSTFHLEDSSFES | IDKEFLYSHTMPGNKH | DSMQPHRRPES    |    |    |    |
| 40_8113  | MVREDVQDSHLEGSSNV | SACTSTFHLEDSSFES | IDKEFLYSHTMPGNKH | DSMQPHRRPES    |    |    |    |
| 41_1767  | MVREDVQDSHLEGSSNV | SACTSTFHLEDSSFES | IDKEFLYSHTMPGNKH | DSMQPHRRPES    |    |    |    |
| 42_8428  | MVREDVQDSHLEGSSNV | SACTSTFHLEDSSFES | IDKEFLYSHTMPGNKH | DSMQPHRRPES    |    |    |    |
| 43_9819  | MVREDVQDSHLEGSSNV | SACTSTFHLEDSSFES | IDKEFLYSHTMPGNKH | DSMQPHRRPES    |    |    |    |
| 44_5569  | MVREDVQDSHLEGSSNV | SACTSTFHLEDSSFES | IDKEFLYSHTMPGNKH | DSMQPHRRPES    |    |    |    |
| 45_4189  | MVREDVQDSHLEGSSNV | SACTSTFHLEDSSFES | IDKEFLYSHTMPGNKH | DSMQPHRRPES    |    |    |    |
| 46_1027  | MVREDVQDSHLEGSSNV | SACTSTFHLEDSSFES | IDKEFLYSHTMPGNKH | DSMQPHRRPES    |    |    |    |
| 47_5048  | MVREDVQDSHLEGSSNV | SACTSTFHLEDSSFES | IDKEFLYSHTMPGNKH | DSMQPHRRPES    |    |    |    |
| 48_10124 | MVREDVQDSHLEGSSNV | SACTSTFHLEDSSFES | IDKEFLYSHTMPGNKH | DSMQPHRRPES    |    |    |    |
| 49_7151  | MVREDVQDSHLEGSSNV | SACTSTFHLEDSSFES | IDKEFLYSHTMPGNKH | DSMQPHRRPES    |    |    |    |
| 50_3695  | MVREDVQDSHLEGSSNV | SACTSTFHLEDSSFES | IDKEFLYSHTMPGNKH | DSMQPHRRPES    |    |    |    |
| 51_364   | MVREDVQDSHLEGSSNV | SACTSTFHLEDSSFES | IDKEFLYSHTMPGNKH | DSMQPHRRPES    |    |    |    |
| 52_242   | MVREDVQDSHLEGSSNV | SACTSTFHLEDSSFES | IDKEFLYSHTMPGNKH | DSMQPHRRPES    |    |    |    |
| 53_5225  | MVREDVQDSHLEGSSNV | SACTSTFHLEDSSFES | IDKEFLYSHTMPGNKH | DSMQPHRRPES    |    |    |    |
| 54_1635  | MVREDVQDSHLEGSSNV | SACTSTFHLEDSSFES | IDKEFLYSHTMPGNKH | DSMQPHRRPES    |    |    |    |
| 55_5766  | MVREDVQDSHLEGSSNV | SACTSTFHLEDSSFES | IDKEFLYSHTMPGNKH | DSMQPHRRPES    |    |    |    |
| 56_1557  | MVREDVQDSHLEGSSNV | SACTSTFHLEDSSFES | IDKEFLYSHTMPGNKH | DSMQPHRRPES    |    |    |    |
| 57_10137 | MVREDVQDSHLEGSSNV | SACTSTFHLEDSSFES | IDKEFLYSHTMPGNKH | DSMQPHRRPES    |    |    |    |
| 58_10525 | MVREDVQDSHLEGSSNV | SACTSTFHLEDSSFES | IDKEFLYSHTMPGNKH | DSMQPHRRPES    |    |    |    |
| 59_3457  | MVREDVQDSHLEGSSNV | SACTSTFHLEDSSFES | IDKEFLYSHTMPGNKH | DSMQPHRRPES    |    |    |    |
| 60_8244  | MVREDVQDSHLEGSSNV | SACTSTFHLEDSSFES | IDKEFLYSHTMPGNKH | DSMQPHRRPES    |    |    |    |
| 61_7964  | MVREDVQDSHLEGSSNV | SACTSTFHLEDSSFES | IDKEFLYSHTMPGNKH | DSMQPHRRPES    |    |    |    |
| 62_4413  | MVREDVQDSHLEGSSNV | SACTSTFHLEDSSFES | IDKEFLYSHTMPGNKH | DSMQPHRRPES    |    |    |    |
| 63_6958  | MVREDVQDSHLEGSSNV | SACTSTFHLEDSSFES | IDKEFLYSHTMPGNKH | DSMQPHRRPES    |    |    |    |
| 64_5997  | MNSENVSDKVKAAACE  | MALLQSTIAGLPQGL  | DLTVGPGGQSLSGG   | QQRQVALARARLR  | LD |    |    |
| 65_8711  | MVREDVQDSHLEGSSNV | SACTSTFHLEDSSFES | IDKEFLYSHTMPGNKH | DSMQPHRRPES    |    |    |    |
| 66_9925  | MVREDVQDSHLEGSSNV | SACTSTFHLEDSSFES | IDKEFLYSHTMPGNKH | DSMQPHRRPES    |    |    |    |
| 67_10374 | MVREDVQDSHLEGSSNV | SACTSTFHLEDSSFES | IDKEFLYSHTMPGNKH | DSMQPHRRPES    |    |    |    |
| 68_3713  | MVREDVQDSHLEGSSNV | SACTSTFHLEDSSFES | IDKEFLYSHTMPGNKH | DSMQPHRRPES    |    |    |    |
| 69_4511  | MVREDVQDSHLEGSSNV | SACTSTFHLEDSSFES | IDKEFLYSHTMPGNKH | DSMQPHRRPES    |    |    |    |
| 70_6201  | MVREDVQDSHLEGSSNV | SACTSTFHLEDSSFES | IDKEFLYSHTMPGNKH | DSMQPHRRPES    |    |    |    |
| 71_3261  | MVREDVQDSHLEGSSNV | SACTSTFHLEDSSFES | IDKEFLYSHTMPGNKH | DSMQPHRRPES    |    |    |    |
| 72_8516  | MVREDVQDSHLEGSSNV | SACTSTFHLEDSSFES | IDKEFLYSHTMPGNKH | DSMQPHRRPES    |    |    |    |
| 73_9295  | MVREDVQDSHLEGSSNV | SACTSTFHLEDSSFES | IDKEFLYSHTMPGNKH | DSMQPHRRPES    |    |    |    |
| 74_809   | MVREDVQDSHLEGSSNV | SACTSTFHLEDSSFES | IDKEFLYSHTMPGNKH | DSMQPHRRPES    |    |    |    |
| 75_7282  | MVREDVQDSHLEGSSNV | SACTSTFHLEDSSFES | IDKEFLYSHTMPGNKH | DSMQPHRRPES    |    |    |    |
| 76_4910  | MVREDVQDSHLEGSSNV | SACTSTFHLEDSSFES | IDKEFLYSHTMPGNKH | DSMQPHRRPES    |    |    |    |
| 77_10912 | MVREDVQDSHLEGSSNV | SACTSTFHLEDSSFES | IDKEFLYSHTMPGNKH | DSMQPHRRPES    |    |    |    |
| 78_4020  | MVREDVQDSHLEGSSNV | SACTSTFHLEDSSFES | IDKEFLYSHTMPGNKH | DSMQPHRRPES    |    |    |    |
| 79_6703  | MVREDVQDSHLEGSSNV | SACTSTFHLEDSSFES | IDKEFLYSHTMPGNKH | DSMQPHRRPES    |    |    |    |
| 80_8619  | MVREDVQDSHLEGSSNV | SACTSTFHLEDSSFES | IDKEFLYSHTMPGNKH | DSMQPHRRPES    |    |    |    |
| 81_4126  | MVREDVQDSHLEGSSNV | SACTSTFHLEDSSFES | IDKEFLYSHTMPGNKH | DSMQPHRRPES    |    |    |    |
| 82_1363  | MVREDVQDSHLEGSSNV | SACTSTFHLEDSSFES | IDKEFLYSHTMPGNKH | DSMQPHRRPES    |    |    |    |
| 83_5813  | MVREDVQDSHLEGSSNV | SACTSTFHLEDSSFES | IDKEFLYSHTMPGNKH | DSMQPHRRPES    |    |    |    |
| 84_2044  | MVREDVQDSHLEGSSNV | SACTSTFHLEDSSFES | IDKEFLYSHTMPGNKH | DSMQPHRRPES    |    |    |    |
| 85_7617  | MVREDVQDSHLEGSSNV | SACTSTFHLEDSSFES | IDKEFLYSHTMPGNKH | DSMQPHRRPES    |    |    |    |
| 86_1530  | MVREDVQDSHLEGSSNV | SACTSTFHLEDSSFES | IDKEFLYSHTMPGNKH | DSMQPHRRPES    |    |    |    |
| 87_1890  | MVREDVQDSHLEGSSNV | SACTSTFHLEDSSFES | IDKEFLYSHTMPGNKH | DSMQPHRRPES    |    |    |    |
| 88_7049  | MVREDVQDSHLEGSSNV | SACTSTFHLEDSSFES | IDKEFLYSHTMPGNKH | DSMQPHRRPES    |    |    |    |
| 89_440   | MVREDVQDSHLEGSSNV | SACTSTFHLEDSSFES | IDKEFLYSHTMPGNKH | DSMQPHRRPES    |    |    |    |
| 90_4331  | MVREDVQDSHLEGSSNV | SACTSTFHLEDSSFES | IDKEFLYSHTMPGNKH | DSMQPHRRPES    |    |    |    |

|          | 70                                                            | 80 | 90 | 100 | 110 | 120 |
|----------|---------------------------------------------------------------|----|----|-----|-----|-----|
| 1_1896   | LYNMDQEKAPKRPDQSSSTLDQPKESVDSAAATWRDLFNFNPNRHLVVLVTALFASAVAV  |    |    |     |     |     |
| 2_4785   | LYNMDQEKAPKRPDQSSSTLDQPKESVDSAAATWRDLFNFNPNRHLVVLVTALFASAVAV  |    |    |     |     |     |
| 3_3653   | LYNMDQEKAPKRPDQSSSTLDQPKESVDSAAATWRDLFNFNPNRHLVVLVTALFASAVAV  |    |    |     |     |     |
| 4_8157   | LYNMDQEKAPKRPDQSSSTLDQPKESVDSAAATWRDLFNFNPNRHLVVLVTALFASAVAV  |    |    |     |     |     |
| 5_752    | LYNMDQEKAPKRPDQSSSTLDQPKESVDSAAATWRDLFNFNPNRHLVVLVTALFASAVAV  |    |    |     |     |     |
| 6_8853   | LYNMDQEKAPKRPDQSSSTLDQPKESVDSAAATWRDLFNFNPNRHLVVLVTALFASAVAV  |    |    |     |     |     |
| 7_4015   | VKVYNSHEHELHNFRLLAAREAGKHARVQTMWNALQAAFIKIYMAVVFLSGFFFGIYQVDQ |    |    |     |     |     |
| 8_2020   | LYNMDQEKAPKRPDQSSSTLDQPKESVDSAAATWRDLFNFNPNRHLVVLVTALFASAVAV  |    |    |     |     |     |
| 9_1829   | LYNMDQEKAPKRPDQSSSTLDQPKESVDSAAATWRDLFNFNPNRHLVVLVTALFASAVAV  |    |    |     |     |     |
| 10_6452  | LYNMDQEKAPKRPDQSSSTLDQPKESVDSAAATWRDLFNFNPNRHLVVLVTALFASAVAV  |    |    |     |     |     |
| 11_8627  | LYNMDQEKAPKRPDQSSSTLDQPKESVDSAAATWRDLFNFNPNRHLVVLVTALFASAVAV  |    |    |     |     |     |
| 12_6118  | LYNMDQEKAPKRPDQSSSTLDQPKESVDSAAATWRDLFNFNPNRHLVVLVTALFASAVAV  |    |    |     |     |     |
| 13_2688  | LYNMDQEKAPKRPDQSSSTLDQPKESVDSAAATWRDLFNFNPNRHLVVLVTALFASAVAV  |    |    |     |     |     |
| 14_6406  | LYNMDQEKAPKRPDQSSSTLDQPKESVDSAAATWRDLFNFNPNRHLVVLVTALFASAVAV  |    |    |     |     |     |
| 15_9419  | LYNMDQEKAPKRPDQSSSTLDQPKESVDSAAATWRDLFNFNPNRHLVVLVTALFASAVAV  |    |    |     |     |     |
| 16_8507  | LYNMDQEKAPKRPDQSSSTLDQPKESVDSAAATWRDLFNFNPNRHLVVLVTALFASAVAV  |    |    |     |     |     |
| 17_5884  | LYNMDQEKAPKRPDQSSSTLDQPKESVDSAAATWRDLFNFNPNRHLVVLVTALFASAVAV  |    |    |     |     |     |
| 18_2670  | LYNMDQEKAPKRPDQSSSTLDQPKESVDSAAATWRDLFNFNPNRHLVVLVTALFASAVAV  |    |    |     |     |     |
| 19_5172  | LYNMDQEKAPKRPDQSSSTLDQPKESVDSAAATWRDLFNFNPNRHLVVLVTALFASAVAV  |    |    |     |     |     |
| 20_8057  | LYNMDQEKAPKRPDQSSSTLDQPKESVDSAAATWRDLFNFNPNRHLVVLVTALFASAVAV  |    |    |     |     |     |
| 21_4920  | QOSTLFSDTLYANIAMNSENVSQDKVKAACEMALLQSTIAGLPQGLDVLGPGGGQSLSGG  |    |    |     |     |     |
| 22_6393  | LYNMDQEKAPKRPDQSSSTLDQPKESVDSAAATWRDLFNFNPNRHLVVLVTALFASAVAV  |    |    |     |     |     |
| 23_8263  | LYNMDQEKAPKRPDQSSSTLDQPKESVDSAAATWRDLFNFNPNRHLVVLVTALFASAVAV  |    |    |     |     |     |
| 24_8248  | LYNMDQEKAPKRPDQSSSTLDQPKESVDSAAATWRDLFNFNPNRHLVVLVTALFASAVAV  |    |    |     |     |     |
| 25_6733  | LYNMDQEKAPKRPDQSSSTLDQPKESVDSAAATWRDLFNFNPNRHLVVLVTALFASAVAV  |    |    |     |     |     |
| 26_2277  | LYNMDQEKAPKRPDQSSSTLDQPKESVDSAAATWRDLFNFNPNRHLVVLVTALFASAVAV  |    |    |     |     |     |
| 27_2623  | LYNMDQEKAPKRPDQSSSTLDQPKESVDSAAATWRDLFNFNPNRHLVVLVTALFASAVAV  |    |    |     |     |     |
| 28_7413  | LYNMDQEKAPKRPDQSSSTLDQPKESVDSAAATWRDLFNFNPNRHLVVLVTALFASAVAV  |    |    |     |     |     |
| 29_8980  | LYNMDQEKAPKRPDQSSSTLDQPKESVDSAAATWRDLFNFNPNRHLVVLVTALFASAVAV  |    |    |     |     |     |
| 30_8706  | LYNMDQEKAPKRPDQSSSTLDQPKESVDSAAATWRDLFNFNPNRHLVVLVTALFASAVAV  |    |    |     |     |     |
| 31_6378  | LYNMDQEKAPKRPDQSSSTLDQPKESVDSAAATWRDLFNFNPNRHLVVLVTALFASAVAV  |    |    |     |     |     |
| 32_4679  | LYNMDQEKAPKRPDQSSSTLDQPKESVDSAAATWRDLFNFNPNRHLVVLVTALFASAVAV  |    |    |     |     |     |
| 33_2437  | LYNMDQEKAPKRPDQSSSTLDQPKESVDSAAATWRDLFNFNPNRHLVVLVTALFASAVAV  |    |    |     |     |     |
| 34_9700  | LYNMDQEKAPKRPDQSSSTLDQPKESVDSAAATWRDLFNFNPNRHLVVLVTALFASAVAV  |    |    |     |     |     |
| 35_10218 | LYNMDQEKAPKRPDQSSSTLDQPKESVDSAAATWRDLFNFNPNRHLVVLVTALFASAVAV  |    |    |     |     |     |
| 36_2652  | LYNMDQEKAPKRPDQSSSTLDQPKESVDSAAATWRDLFNFNPNRHLVVLVTALFASAVAV  |    |    |     |     |     |
| 37_5779  | LYNMDQEKAPKRPDQSSSTLDQPKESVDSAAATWRDLFNFNPNRHLVVLVTALFASAVAV  |    |    |     |     |     |
| 38_654   | LYNMDQEKAPKRPDQSSSTLDQPKESVDSAAATWRDLFNFNPNRHLVVLVTALFASAVAV  |    |    |     |     |     |
| 39_4879  | LYNMDQEKAPKRPDQSSSTLDQPKESVDSAAATWRDLFNFNPNRHLVVLVTALFASAVAV  |    |    |     |     |     |
| 40_8113  | LYNMDQEKAPKRPDQSSSTLDQPKESVDSAAATWRDLFNFNPNRHLVVLVTALFASAVAV  |    |    |     |     |     |
| 41_1767  | LYNMDQEKAPKRPDQSSSTLDQPKESVDSAAATWRDLFNFNPNRHLVVLVTALFASAVAV  |    |    |     |     |     |
| 42_8428  | LYNMDQEKAPKRPDQSSSTLDQPKESVDSAAATWRDLFNFNPNRHLVVLVTALFASAVAV  |    |    |     |     |     |
| 43_9819  | LYNMDQEKAPKRPDQSSSTLDQPKESVDSAAATWRDLFNFNPNRHLVVLVTALFASAVAV  |    |    |     |     |     |
| 44_5569  | LYNMDQEKAPKRPDQSSSTLDQPKESVDSAAATWRDLFNFNPNRHLVVLVTALFASAVAV  |    |    |     |     |     |
| 45_4189  | LYNMDQEKAPKRPDQSSSTLDQPKESVDSAAATWRDLFNFNPNRHLVVLVTALFASAVAV  |    |    |     |     |     |
| 46_1027  | LYNMDQEKAPKRPDQSSSTLDQPKESVDSAAATWRDLFNFNPNRHLVVLVTALFASAVAV  |    |    |     |     |     |
| 47_5048  | LYNMDQEKAPKRPDQSSSTLDQPKESVDSAAATWRDLFNFNPNRHLVVLVTALFASAVAV  |    |    |     |     |     |
| 48_10124 | LYNMDQEKAPKRPDQSSSTLDQPKESVDSAAATWRDLFNFNPNRHLVVLVTALFASAVAV  |    |    |     |     |     |
| 49_7151  | LYNMDQEKAPKRPDQSSSTLDQPKESVDSAAATWRDLFNFNPNRHLVVLVTALFASAVAV  |    |    |     |     |     |
| 50_3695  | LYNMDQEKAPKRPDQSSSTLDQPKESVDSAAATWRDLFNFNPNRHLVVLVTALFASAVAV  |    |    |     |     |     |
| 51_364   | LYNMDQEKAPKRPDQSSSTLDQPKESVDSAAATWRDLFNFNPNRHLVVLVTALFASAVAV  |    |    |     |     |     |
| 52_242   | LYNMDQEKAPKRPDQSSSTLDQPKESVDSAAATWRDLFNFNPNRHLVVLVTALFASAVAV  |    |    |     |     |     |
| 53_5225  | LYNMDQEKAPKRPDQSSSTLDQPKESVDSAAATWRDLFNFNPNRHLVVLVTALFASAVAV  |    |    |     |     |     |
| 54_1635  | LYNMDQEKAPKRPDQSSSTLDQPKESVDSAAATWRDLFNFNPNRHLVVLVTALFASAVAV  |    |    |     |     |     |
| 55_5766  | LYNMDQEKAPKRPDQSSSTLDQPKESVDSAAATWRDLFNFNPNRHLVVLVTALFASAVAV  |    |    |     |     |     |
| 56_1557  | LYNMDQEKAPKRPDQSSSTLDQPKESVDSAAATWRDLFNFNPNRHLVVLVTALFASAVAV  |    |    |     |     |     |
| 57_10137 | LYNMDQEKAPKRPDQSSSTLDQPKESVDSAAATWRDLFNFNPNRHLVVLVTALFASAVAV  |    |    |     |     |     |
| 58_10525 | LYNMDQEKAPKRPDQSSSTLDQPKESVDSAAATWRDLFNFNPNRHLVVLVTALFASAVAV  |    |    |     |     |     |
| 59_3457  | LYNMDQEKAPKRPDQSSSTLDQPKESVDSAAATWRDLFNFNPNRHLVVLVTALFASAVAV  |    |    |     |     |     |
| 60_8244  | LYNMDQEKAPKRPDQSSSTLDQPKESVDSAAATWRDLFNFNPNRHLVVLVTALFASAVAV  |    |    |     |     |     |
| 61_7964  | LYNMDQEKAPKRPDQSSSTLDQPKESVDSAAATWRDLFNFNPNRHLVVLVTALFASAVAV  |    |    |     |     |     |
| 62_4413  | LYNMDQEKAPKRPDQSSSTLDQPKESVDSAAATWRDLFNFNPNRHLVVLVTALFASAVAV  |    |    |     |     |     |
| 63_6958  | LYNMDQEKAPKRPDQSSSTLDQPKESVDSAAATWRDLFNFNPNRHLVVLVTALFASAVAV  |    |    |     |     |     |
| 64_5997  | PVLILDVTSGLDPKSKLMIMDAIRYWRSGRTTIVITHDVSQVGDDDDYVYVMDKAEVREE  |    |    |     |     |     |
| 65_8711  | LYNMDQEKAPKRPDQSSSTLDQPKESVDSAAATWRDLFNFNPNRHLVVLVTALFASAVAV  |    |    |     |     |     |
| 66_9925  | LYNMDQEKAPKRPDQSSSTLDQPKESVDSAAATWRDLFNFNPNRHLVVLVTALFASAVAV  |    |    |     |     |     |
| 67_10374 | LYNMDQEKAPKRPDQSSSTLDQPKESVDSAAATWRDLFNFNPNRHLVVLVTALFASAVAV  |    |    |     |     |     |
| 68_3713  | LYNMDQEKAPKRPDQSSSTLDQPKESVDSAAATWRDLFNFNPNRHLVVLVTALFASAVAV  |    |    |     |     |     |
| 69_4511  | LYNMDQEKAPKRPDQSSSTLDQPKESVDSAAATWRDLFNFNPNRHLVVLVTALFASAVAV  |    |    |     |     |     |
| 70_6201  | LYNMDQEKAPKRPDQSSSTLDQPKESVDSAAATWRDLFNFNPNRHLVVLVTALFASAVAV  |    |    |     |     |     |
| 71_3261  | LYNMDQEKAPKRPDQSSSTLDQPKESVDSAAATWRDLFNFNPNRHLVVLVTALFASAVAV  |    |    |     |     |     |
| 72_8516  | LYNMDQEKAPKRPDQSSSTLDQPKESVDSAAATWRDLFNFNPNRHLVVLVTALFASAVAV  |    |    |     |     |     |
| 73_9295  | LYNMDQEKAPKRPDQSSSTLDQPKESVDSAAATWRDLFNFNPNRHLVVLVTALFASAVAV  |    |    |     |     |     |
| 74_809   | LYNMDQEKAPKRPDQSSSTLDQPKESVDSAAATWRDLFNFNPNRHLVVLVTALFASAVAV  |    |    |     |     |     |
| 75_7282  | LYNMDQEKAPKRPDQSSSTLDQPKESVDSAAATWRDLFNFNPNRHLVVLVTALFASAVAV  |    |    |     |     |     |
| 76_4910  | LYNMDQEKAPKRPDQSSSTLDQPKESVDSAAATWRDLFNFNPNRHLVVLVTALFASAVAV  |    |    |     |     |     |
| 77_10912 | LYNMDQEKAPKRPDQSSSTLDQPKESVDSAAATWRDLFNFNPNRHLVVLVTALFASAVAV  |    |    |     |     |     |
| 78_4020  | LYNMDQEKAPKRPDQSSSTLDQPKESVDSAAATWRDLFNFNPNRHLVVLVTALFASAVAV  |    |    |     |     |     |
| 79_6703  | LYNMDQEKAPKRPDQSSSTLDQPKESVDSAAATWRDLFNFNPNRHLVVLVTALFASAVAV  |    |    |     |     |     |
| 80_8619  | LYNMDQEKAPKRPDQSSSTLDQPKESVDSAAATWRDLFNFNPNRHLVVLVTALFASAVAV  |    |    |     |     |     |
| 81_4126  | LYNMDQEKAPKRPDQSSSTLDQPKESVDSAAATWRDLFNFNPNRHLVVLVTALFASAVAV  |    |    |     |     |     |
| 82_1363  | LYNMDQEKAPKRPDQSSSTLDQPKESVDSAAATWRDLFNFNPNRHLVVLVTALFASAVAV  |    |    |     |     |     |
| 83_5813  | LYNMDQEKAPKRPDQSSSTLDQPKESVDSAAATWRDLFNFNPNRHLVVLVTALFASAVAV  |    |    |     |     |     |
| 84_2044  | LYNMDQEKAPKRPDQSSSTLDQPKESVDSAAATWRDLFNFNPNRHLVVLVTALFASAVAV  |    |    |     |     |     |
| 85_7617  | LYNMDQEKAPKRPDQSSSTLDQPKESVDSAAATWRDLFNFNPNRHLVVLVTALFASAVAV  |    |    |     |     |     |
| 86_1530  | LYNMDQEKAPKRPDQSSSTLDQPKESVDSAAATWRDLFNFNPNRHLVVLVTALFASAVAV  |    |    |     |     |     |
| 87_1890  | LYNMDQEKAPKRPDQSSSTLDQPKESVDSAAATWRDLFNFNPNRHLVVLVTALFASAVAV  |    |    |     |     |     |
| 88_7049  | LYNMDQEKAPKRPDQSSSTLDQPKESVDSAAATWRDLFNFNPNRHLVVLVTALFASAVAV  |    |    |     |     |     |
| 89_440   | LYNMDQEKAPKRPDQSSSTLDQPKESVDSAAATWRDLFNFNPNRHLVVLVTALFASAVAV  |    |    |     |     |     |
| 90_4331  | LYNMDQEKAPKRPDQSSSTLDQPKESVDSAAATWRDLFNFNPNRHLVVLVTALFASAVAV  |    |    |     |     |     |

|          | 130     | 140      | 150      | 160      | 170          | 180                   |
|----------|---------|----------|----------|----------|--------------|-----------------------|
| 1_1896   | GADIAGV | IIFGNVFQ | ELTSYAAR | QLGP     | EEARRNVNFWVS | IIAALAVTHLIAAATQMGSWI |
| 2_4785   | GADIAGV | IIFGNVFQ | ELTSYAAR | QLGP     | EEARRNVNFWVS | IIAALAVTHLIAAATQMGSWI |
| 3_3653   | GADIAGV | IIFGNVFQ | ELTSYAAR | QLGP     | EEARRNVNFWVS | IIAALAVTHLIAAATQMGSWI |
| 4_8157   | GADIAGV | IIFGNVFQ | ELTSYAAR | QLGP     | EEARRNVNFWVS | IIAALAVTHLIAAATQMGSWI |
| 5_752    | GADIAGV | IIFGNVFQ | ELTSYAAR | QLGP     | EEARRNVNFWVS | IIAALAVTHLIAAATQMGSWI |
| 6_8853   | GADIAGV | IIFGNVFQ | ELTSYAAR | QLGP     | EEARRNVNFWVS | IIAALAVTHLIAAATQMGSWI |
| 7_4015   | GNMSAGD | VITTFYAL | STFQGVQ  | GLGPHILN | LVRGMOAGK    | ALKSVVFD              |
| 8_2020   | GADIAGV | IIFGNVFQ | ELTSYAAR | QLGP     | EEARRNVNFWVS | IIAALAVTHLIAAATQMGSWI |
| 9_1829   | GADIAGV | IIFGNVFQ | ELTSYAAR | QLGP     | EEARRNVNFWVS | IIAALAVTHLIAAATQMGSWI |
| 10_6452  | GADIAGV | IIFGNVFQ | ELTSYAAR | QLGP     | EEARRNVNFWVS | IIAALAVTHLIAAATQMGSWI |
| 11_8627  | GADIAGV | IIFGNVFQ | ELTSYAAR | QLGP     | EEARRNVNFWVS | IIAALAVTHLIAAATQMGSWI |
| 12_6118  | GADIAGV | IIFGNVFQ | ELTSYAAR | QLGP     | EEARRNVNFWVS | IIAALAVTHLIAAATQMGSWI |
| 13_2688  | GADIAGV | IIFGNVFQ | ELTSYAAR | QLGP     | EEARRNVNFWVS | IIAALAVTHLIAAATQMGSWI |
| 14_6406  | GADIAGV | IIFGNVFQ | ELTSYAAR | QLGP     | EEARRNVNFWVS | IIAALAVTHLIAAATQMGSWI |
| 15_9419  | GADIAGV | IIFGNVFQ | ELTSYAAR | QLGP     | EEARRNVNFWVS | IIAALAVTHLIAAATQMGSWI |
| 16_8507  | GADIAGV | IIFGNVFQ | ELTSYAAR | QLGP     | EEARRNVNFWVS | IIAALAVTHLIAAATQMGSWI |
| 17_5884  | GADIAGV | IIFGNVFQ | ELTSYAAR | QLGP     | EEARRNVNFWVS | IIAALAVTHLIAAATQMGSWI |
| 18_2670  | GADIAGV | IIFGNVFQ | ELTSYAAR | QLGP     | EEARRNVNFWVS | IIAALAVTHLIAAATQMGSWI |
| 19_5172  | GADIAGV | IIFGNVFQ | ELTSYAAR | QLGP     | EEARRNVNFWVS | IIAALAVTHLIAAATQMGSWI |
| 20_8057  | GADIAGV | IIFGNVFQ | ELTSYAAR | QLGP     | EEARRNVNFWVS | IIAALAVTHLIAAATQMGSWI |
| 21_4920  | QRQRV   | ALARARL  | RDPVLIL  | DEVTSGLD | PKSKLMIMDA   | IRYWRSGR              |
| 22_6393  | GADIAGV | IIFGNVFQ | ELTSYAAR | QLGP     | EEARRNVNFWVS | IIAALAVTHLIAAATQMGSWI |
| 23_8263  | GADIAGV | IIFGNVFQ | ELTSYAAR | QLGP     | EEARRNVNFWVS | IIAALAVTHLIAAATQMGSWI |
| 24_8248  | GADIAGV | IIFGNVFQ | ELTSYAAR | QLGP     | EEARRNVNFWVS | IIAALAVTHLIAAATQMGSWI |
| 25_6733  | GADIAGV | IIFGNVFQ | ELTSYAAR | QLGP     | EEARRNVNFWVS | IIAALAVTHLIAAATQMGSWI |
| 26_2277  | GADIAGV | IIFGNVFQ | ELTSYAAR | QLGP     | EEARRNVNFWVS | IIAALAVTHLIAAATQMGSWI |
| 27_2623  | GADIAGV | IIFGNVFQ | ELTSYAAR | QLGP     | EEARRNVNFWVS | IIAALAVTHLIAAATQMGSWI |
| 28_7413  | GADIAGV | IIFGNVFQ | ELTSYAAR | QLGP     | EEARRNVNFWVS | IIAALAVTHLIAAATQMGSWI |
| 29_8980  | GADIAGV | IIFGNVFQ | ELTSYAAR | QLGP     | EEARRNVNFWVS | IIAALAVTHLIAAATQMGSWI |
| 30_8706  | GADIAGV | IIFGNVFQ | ELTSYAAR | QLGP     | EEARRNVNFWVS | IIAALAVTHLIAAATQMGSWI |
| 31_6378  | GADIAGV | IIFGNVFQ | ELTSYAAR | QLGP     | EEARRNVNFWVS | IIAALAVTHLIAAATQMGSWI |
| 32_4679  | GADIAGV | IIFGNVFQ | ELTSYAAR | QLGP     | EEARRNVNFWVS | IIAALAVTHLIAAATQMGSWI |
| 33_2437  | GADIAGV | IIFGNVFQ | ELTSYAAR | QLGP     | EEARRNVNFWVS | IIAALAVTHLIAAATQMGSWI |
| 34_9700  | GADIAGV | IIFGNVFQ | ELTSYAAR | QLGP     | EEARRNVNFWVS | IIAALAVTHLIAAATQMGSWI |
| 35_10218 | GADIAGV | IIFGNVFQ | ELTSYAAR | QLGP     | EEARRNVNFWVS | IIAALAVTHLIAAATQMGSWI |
| 36_2652  | GADIAGV | IIFGNVFQ | ELTSYAAR | QLGP     | EEARRNVNFWVS | IIAALAVTHLIAAATQMGSWI |
| 37_5779  | GADIAGV | IIFGNVFQ | ELTSYAAR | QLGP     | EEARRNVNFWVS | IIAALAVTHLIAAATQMGSWI |
| 38_654   | GADIAGV | IIFGNVFQ | ELTSYAAR | QLGP     | EEARRNVNFWVS | IIAALAVTHLIAAATQMGSWI |
| 39_4879  | GADIAGV | IIFGNVFQ | ELTSYAAR | QLGP     | EEARRNVNFWVS | IIAALAVTHLIAAATQMGSWI |
| 40_8113  | GADIAGV | IIFGNVFQ | ELTSYAAR | QLGP     | EEARRNVNFWVS | IIAALAVTHLIAAATQMGSWI |
| 41_1767  | GADIAGV | IIFGNVFQ | ELTSYAAR | QLGP     | EEARRNVNFWVS | IIAALAVTHLIAAATQMGSWI |
| 42_8428  | GADIAGV | IIFGNVFQ | ELTSYAAR | QLGP     | EEARRNVNFWVS | IIAALAVTHLIAAATQMGSWI |
| 43_9819  | GADIAGV | IIFGNVFQ | ELTSYAAR | QLGP     | EEARRNVNFWVS | IIAALAVTHLIAAATQMGSWI |
| 44_5569  | GADIAGV | IIFGNVFQ | ELTSYAAR | QLGP     | EEARRNVNFWVS | IIAALAVTHLIAAATQMGSWI |
| 45_4189  | GADIAGV | IIFGNVFQ | ELTSYAAR | QLGP     | EEARRNVNFWVS | IIAALAVTHLIAAATQMGSWI |
| 46_1027  | GADIAGV | IIFGNVFQ | ELTSYAAR | QLGP     | EEARRNVNFWVS | IIAALAVTHLIAAATQMGSWI |
| 47_5048  | GADIAGV | IIFGNVFQ | ELTSYAAR | QLGP     | EEARRNVNFWVS | IIAALAVTHLIAAATQMGSWI |
| 48_10124 | GADIAGV | IIFGNVFQ | ELTSYAAR | QLGP     | EEARRNVNFWVS | IIAALAVTHLIAAATQMGSWI |
| 49_7151  | GADIAGV | IIFGNVFQ | ELTSYAAR | QLGP     | EEARRNVNFWVS | IIAALAVTHLIAAATQMGSWI |
| 50_3695  | GADIAGV | IIFGNVFQ | ELTSYAAR | QLGP     | EEARRNVNFWVS | IIAALAVTHLIAAATQMGSWI |
| 51_364   | GADIAGV | IIFGNVFQ | ELTSYAAR | QLGP     | EEARRNVNFWVS | IIAALAVTHLIAAATQMGSWI |
| 52_242   | GADIAGV | IIFGNVFQ | ELTSYAAR | QLGP     | EEARRNVNFWVS | IIAALAVTHLIAAATQMGSWI |
| 53_5225  | GADIAGV | IIFGNVFQ | ELTSYAAR | QLGP     | EEARRNVNFWVS | IIAALAVTHLIAAATQMGSWI |
| 54_1635  | GADIAGV | IIFGNVFQ | ELTSYAAR | QLGP     | EEARRNVNFWVS | IIAALAVTHLIAAATQMGSWI |
| 55_5766  | GADIAGV | IIFGNVFQ | ELTSYAAR | QLGP     | EEARRNVNFWVS | IIAALAVTHLIAAATQMGSWI |
| 56_1557  | GADIAGV | IIFGNVFQ | ELTSYAAR | QLGP     | EEARRNVNFWVS | IIAALAVTHLIAAATQMGSWI |
| 57_10137 | GADIAGV | IIFGNVFQ | ELTSYAAR | QLGP     | EEARRNVNFWVS | IIAALAVTHLIAAATQMGSWI |
| 58_10525 | GADIAGV | IIFGNVFQ | ELTSYAAR | QLGP     | EEARRNVNFWVS | IIAALAVTHLIAAATQMGSWI |
| 59_3457  | GADIAGV | IIFGNVFQ | ELTSYAAR | QLGP     | EEARRNVNFWVS | IIAALAVTHLIAAATQMGSWI |
| 60_8244  | GADIAGV | IIFGNVFQ | ELTSYAAR | QLGP     | EEARRNVNFWVS | IIAALAVTHLIAAATQMGSWI |
| 61_7964  | GADIAGV | IIFGNVFQ | ELTSYAAR | QLGP     | EEARRNVNFWVS | IIAALAVTHLIAAATQMGSWI |
| 62_4413  | GADIAGV | IIFGNVFQ | ELTSYAAR | QLGP     | EEARRNVNFWVS | IIAALAVTHLIAAATQMGSWI |
| 63_6958  | GADIAGV | IIFGNVFQ | ELTSYAAR | QLGP     | EEARRNVNFWVS | IIAALAVTHLIAAATQMGSWI |
| 64_5997  | GLCKQL  | LSSRDGYF | LQLRAL   | AESGAD   | SNPEGVMT     | PEDDLSSL              |
| 65_8711  | GADIAGV | IIFGNVFQ | ELTSYAAR | QLGP     | EEARRNVNFWVS | IIAALAVTHLIAAATQMGSWI |
| 66_9925  | GADIAGV | IIFGNVFQ | ELTSYAAR | QLGP     | EEARRNVNFWVS | IIAALAVTHLIAAATQMGSWI |
| 67_10374 | GADIAGV | IIFGNVFQ | ELTSYAAR | QLGP     | EEARRNVNFWVS | IIAALAVTHLIAAATQMGSWI |
| 68_3713  | GADIAGV | IIFGNVFQ | ELTSYAAR | QLGP     | EEARRNVNFWVS | IIAALAVTHLIAAATQMGSWI |
| 69_4511  | GADIAGV | IIFGNVFQ | ELTSYAAR | QLGP     | EEARRNVNFWVS | IIAALAVTHLIAAATQMGSWI |
| 70_6201  | GADIAGV | IIFGNVFQ | ELTSYAAR | QLGP     | EEARRNVNFWVS | IIAALAVTHLIAAATQMGSWI |
| 71_3261  | GADIAGV | IIFGNVFQ | ELTSYAAR | QLGP     | EEARRNVNFWVS | IIAALAVTHLIAAATQMGSWI |
| 72_8516  | GADIAGV | IIFGNVFQ | ELTSYAAR | QLGP     | EEARRNVNFWVS | IIAALAVTHLIAAATQMGSWI |
| 73_9295  | GADIAGV | IIFGNVFQ | ELTSYAAR | QLGP     | EEARRNVNFWVS | IIAALAVTHLIAAATQMGSWI |
| 74_809   | GADIAGV | IIFGNVFQ | ELTSYAAR | QLGP     | EEARRNVNFWVS | IIAALAVTHLIAAATQMGSWI |
| 75_7282  | GADIAGV | IIFGNVFQ | ELTSYAAR | QLGP     | EEARRNVNFWVS | IIAALAVTHLIAAATQMGSWI |
| 76_4910  | GADIAGV | IIFGNVFQ | ELTSYAAR | QLGP     | EEARRNVNFWVS | IIAALAVTHLIAAATQMGSWI |
| 77_10912 | GADIAGV | IIFGNVFQ | ELTSYAAR | QLGP     | EEARRNVNFWVS | IIAALAVTHLIAAATQMGSWI |
| 78_4020  | GADIAGV | IIFGNVFQ | ELTSYAAR | QLGP     | EEARRNVNFWVS | IIAALAVTHLIAAATQMGSWI |
| 79_6703  | GADIAGV | IIFGNVFQ | ELTSYAAR | QLGP     | EEARRNVNFWVS | IIAALAVTHLIAAATQMGSWI |
| 80_8619  | GADIAGV | IIFGNVFQ | ELTSYAAR | QLGP     | EEARRNVNFWVS | IIAALAVTHLIAAATQMGSWI |
| 81_4126  | GADIAGV | IIFGNVFQ | ELTSYAAR | QLGP     | EEARRNVNFWVS | IIAALAVTHLIAAATQMGSWI |
| 82_1363  | GADIAGV | IIFGNVFQ | ELTSYAAR | QLGP     | EEARRNVNFWVS | IIAALAVTHLIAAATQMGSWI |
| 83_5813  | GADIAGV | IIFGNVFQ | ELTSYAAR | QLGP     | EEARRNVNFWVS | IIAALAVTHLIAAATQMGSWI |
| 84_2044  | GADIAGV | IIFGNVFQ | ELTSYAAR | QLGP     | EEARRNVNFWVS | IIAALAVTHLIAAATQMGSWI |
| 85_7617  | GADIAGV | IIFGNVFQ | ELTSYAAR | QLGP     | EEARRNVNFWVS | IIAALAVTHLIAAATQMGSWI |
| 86_1530  | GADIAGV | IIFGNVFQ | ELTSYAAR | QLGP     | EEARRNVNFWVS | IIAALAVTHLIAAATQMGSWI |
| 87_1890  | GADIAGV | IIFGNVFQ | ELTSYAAR | QLGP     | EEARRNVNFWVS | IIAALAVTHLIAAATQMGSWI |
| 88_7049  | GADIAGV | IIFGNVFQ | ELTSYAAR | QLGP     | EEARRNVNFWVS | IIAALAVTHLIAAATQMGSWI |
| 89_440   | GADIAGV | IIFGNVFQ | ELTSYAAR | QLGP     | EEARRNVNFWVS | IIAALAVTHLIAAATQMGSWI |
| 90_4331  | GADIAGV | IIFGNVFQ | ELTSYAAR | QLGP     | EEARRNVNFWVS | IIAALAVTHLIAAATQMGSWI |

|          | 190  | 200  | 210   | 220  | 230  | 240  |
|----------|------|------|-------|------|------|------|
| 1_1896   | KYGE | MQAR | SARLE | LFRR | MLSK | QMGW |
| 2_4785   | KYGE | MQAR | SARLE | LFRR | MLSK | QMGW |
| 3_3653   | KYGE | MQAR | SARLE | LFRR | MLSK | QMGW |
| 4_8157   | KYGE | MQAR | SARLE | LFRR | MLSK | QMGW |
| 5_752    | KYGE | MQAR | SARLE | LFRR | MLSK | QMGW |
| 6_8853   | KYGE | MQAR | SARLE | LFRR | MLSK | QMGW |
| 7_4015   | VFEG | RVEV | KSVS  | FAYP | SSPA | VOVL |
| 8_2020   | KYGE | MQAR | SARLE | LFRR | MLSK | QMGW |
| 9_1829   | KYGE | MQAR | SARLE | LFRR | MLSK | QMGW |
| 10_6452  | KYGE | MQAR | SARLE | LFRR | MLSK | QMGW |
| 11_8627  | KYGE | MQAR | SARLE | LFRR | MLSK | QMGW |
| 12_6118  | KYGE | MQAR | SARLE | LFRR | MLSK | QMGW |
| 13_2688  | KYGE | MQAR | SARLE | LFRR | MLSK | QMGW |
| 14_6406  | KYGE | MQAR | SARLE | LFRR | MLSK | QMGW |
| 15_9419  | KYGE | MQAR | SARLE | LFRR | MLSK | QMGW |
| 16_8507  | KYGE | MQAR | SARLE | LFRR | MLSK | QMGW |
| 17_5884  | KYGE | MQAR | SARLE | LFRR | MLSK | QMGW |
| 18_2670  | KYGE | MQAR | SARLE | LFRR | MLSK | QMGW |
| 19_5172  | KYGE | MQAR | SARLE | LFRR | MLSK | QMGW |
| 20_8057  | KYGE | MQAR | SARLE | LFRR | MLSK | QMGW |
| 21_4920  | DDYV | VM   | DKAE  | VREE | GLCK | QLLS |
| 22_6393  | KYGE | MQAR | SARLE | LFRR | MLSK | QMGW |
| 23_8263  | KYGE | MQAR | SARLE | LFRR | MLSK | QMGW |
| 24_8248  | KYGE | MQAR | SARLE | LFRR | MLSK | QMGW |
| 25_6733  | KYGE | MQAR | SARLE | LFRR | MLSK | QMGW |
| 26_2277  | KYGE | MQAR | SARLE | LFRR | MLSK | QMGW |
| 27_2623  | KYGE | MQAR | SARLE | LFRR | MLSK | QMGW |
| 28_7413  | KYGE | MQAR | SARLE | LFRR | MLSK | QMGW |
| 29_8980  | KYGE | MQAR | SARLE | LFRR | MLSK | QMGW |
| 30_8706  | KYGE | MQAR | SARLE | LFRR | MLSK | QMGW |
| 31_6378  | KYGE | MQAR | SARLE | LFRR | MLSK | QMGW |
| 32_4679  | KYGE | MQAR | SARLE | LFRR | MLSK | QMGW |
| 33_2437  | KYGE | MQAR | SARLE | LFRR | MLSK | QMGW |
| 34_9700  | KYGE | MQAR | SARLE | LFRR | MLSK | QMGW |
| 35_10218 | KYGE | MQAR | SARLE | LFRR | MLSK | QMGW |
| 36_2652  | KYGE | MQAR | SARLE | LFRR | MLSK | QMGW |
| 37_5779  | KYGE | MQAR | SARLE | LFRR | MLSK | QMGW |
| 38_654   | KYGE | MQAR | SARLE | LFRR | MLSK | QMGW |
| 39_4879  | KYGE | MQAR | SARLE | LFRR | MLSK | QMGW |
| 40_8113  | KYGE | MQAR | SARLE | LFRR | MLSK | QMGW |
| 41_1767  | KYGE | MQAR | SARLE | LFRR | MLSK | QMGW |
| 42_8428  | KYGE | MQAR | SARLE | LFRR | MLSK | QMGW |
| 43_9819  | KYGE | MQAR | SARLE | LFRR | MLSK | QMGW |
| 44_5569  | KYGE | MQAR | SARLE | LFRR | MLSK | QMGW |
| 45_4189  | KYGE | MQAR | SARLE | LFRR | MLSK | QMGW |
| 46_1027  | KYGE | MQAR | SARLE | LFRR | MLSK | QMGW |
| 47_5048  | KYGE | MQAR | SARLE | LFRR | MLSK | QMGW |
| 48_10124 | KYGE | MQAR | SARLE | LFRR | MLSK | QMGW |
| 49_7151  | KYGE | MQAR | SARLE | LFRR | MLSK | QMGW |
| 50_3695  | KYGE | MQAR | SARLE | LFRR | MLSK | QMGW |
| 51_364   | KYGE | MQAR | SARLE | LFRR | MLSK | QMGW |
| 52_242   | KYGE | MQAR | SARLE | LFRR | MLSK | QMGW |
| 53_5225  | KYGE | MQAR | SARLE | LFRR | MLSK | QMGW |
| 54_1635  | KYGE | MQAR | SARLE | LFRR | MLSK | QMGW |
| 55_5766  | KYGE | MQAR | SARLE | LFRR | MLSK | QMGW |
| 56_1557  | KYGE | MQAR | SARLE | LFRR | MLSK | QMGW |
| 57_10137 | KYGE | MQAR | SARLE | LFRR | MLSK | QMGW |
| 58_10525 | KYGE | MQAR | SARLE | LFRR | MLSK | QMGW |
| 59_3457  | KYGE | MQAR | SARLE | LFRR | MLSK | QMGW |
| 60_8244  | KYGE | MQAR | SARLE | LFRR | MLSK | QMGW |
| 61_7964  | KYGE | MQAR | SARLE | LFRR | MLSK | QMGW |
| 62_4413  | KYGE | MQAR | SARLE | LFRR | MLSK | QMGW |
| 63_6958  | KYGE | MQAR | SARLE | LFRR | MLSK | QMGW |
| 64_5997  | IPEP | KTT  | SSFG  | ALGR | MSFV | IPGT |
| 65_8711  | KYGE | MQAR | SARLE | LFRR | MLSK | QMGW |
| 66_9925  | KYGE | MQAR | SARLE | LFRR | MLSK | QMGW |
| 67_10374 | KYGE | MQAR | SARLE | LFRR | MLSK | QMGW |
| 68_3713  | KYGE | MQAR | SARLE | LFRR | MLSK | QMGW |
| 69_4511  | KYGE | MQAR | SARLE | LFRR | MLSK | QMGW |
| 70_6201  | KYGE | MQAR | SARLE | LFRR | MLSK | QMGW |
| 71_3261  | KYGE | MQAR | SARLE | LFRR | MLSK | QMGW |
| 72_8516  | KYGE | MQAR | SARLE | LFRR | MLSK | QMGW |
| 73_9295  | KYGE | MQAR | SARLE | LFRR | MLSK | QMGW |
| 74_809   | KYGE | MQAR | SARLE | LFRR | MLSK | QMGW |
| 75_7282  | KYGE | MQAR | SARLE | LFRR | MLSK | QMGW |
| 76_4910  | KYGE | MQAR | SARLE | LFRR | MLSK | QMGW |
| 77_10912 | KYGE | MQAR | SARLE | LFRR | MLSK | QMGW |
| 78_4020  | KYGE | MQAR | SARLE | LFRR | MLSK | QMGW |
| 79_6703  | KYGE | MQAR | SARLE | LFRR | MLSK | QMGW |
| 80_8619  | KYGE | MQAR | SARLE | LFRR | MLSK | QMGW |
| 81_4126  | KYGE | MQAR | SARLE | LFRR | MLSK | QMGW |
| 82_1363  | KYGE | MQAR | SARLE | LFRR | MLSK | QMGW |
| 83_5813  | KYGE | MQAR | SARLE | LFRR | MLSK | QMGW |
| 84_2044  | KYGE | MQAR | SARLE | LFRR | MLSK | QMGW |
| 85_7617  | KYGE | MQAR | SARLE | LFRR | MLSK | QMGW |
| 86_1530  | KYGE | MQAR | SARLE | LFRR | MLSK | QMGW |
| 87_1890  | KYGE | MQAR | SARLE | LFRR | MLSK | QMGW |
| 88_7049  | KYGE | MQAR | SARLE | LFRR | MLSK | QMGW |
| 89_440   | KYGE | MQAR | SARLE | LFRR | MLSK | QMGW |
| 90_4331  | KYGE | MQAR | SARLE | LFRR | MLSK | QMGW |

|          | 250   | 260     | 270    | 280   | 290   | 300                                          |
|----------|-------|---------|--------|-------|-------|----------------------------------------------|
| 1_1896   | DFM   | LSI     | AGT    | IVAF  | KYG   | PLMTLVITATVPIAMFIMRALSQMLEKAVRTQKEKQAVATKLSA |
| 2_4785   | DFM   | LSI     | AGT    | IVAF  | KYG   | PLMTLVITATVPIAMFIMRALSQMLEKAVRTQKEKQAVATKLSA |
| 3_3653   | DFM   | LSI     | AGT    | IVAF  | KYG   | PLMTLVITATVPIAMFIMRALSQMLEKAVRTQKEKQAVATKLSA |
| 4_8157   | DFM   | LSI     | AGT    | IVAF  | KYG   | PLMTLVITATVPIAMFIMRALSQMLEKAVRTQKEKQAVATKLSA |
| 5_752    | DFM   | LSI     | AGT    | IVAF  | KYG   | PLMTLVITATVPIAMFIMRALSQMLEKAVRTQKEKQAVATKLSA |
| 6_8853   | DFM   | LSI     | AGT    | IVAF  | KYG   | PLMTLVITATVPIAMFIMRALSQMLEKAVRTQKEKQAVATKLSA |
| 7_4015   | LSGE  | ILLDEHP | IQTL   | DSEW  | RKNV  | TLVQQQSTLFS                                  |
| 8_2020   | DFM   | LSI     | AGT    | IVAF  | KYG   | PLMTLVITATVPIAMFIMRALSQMLEKAVRTQKEKQAVATKLSA |
| 9_1829   | DFM   | LSI     | AGT    | IVAF  | KYG   | PLMTLVITATVPIAMFIMRALSQMLEKAVRTQKEKQAVATKLSA |
| 10_6452  | DFM   | LSI     | AGT    | IVAF  | KYG   | PLMTLVITATVPIAMFIMRALSQMLEKAVRTQKEKQAVATKLSA |
| 11_8627  | DFM   | LSI     | AGT    | IVAF  | KYG   | PLMTLVITATVPIAMFIMRALSQMLEKAVRTQKEKQAVATKLSA |
| 12_6118  | DFM   | LSI     | AGT    | IVAF  | KYG   | PLMTLVITATVPIAMFIMRALSQMLEKAVRTQKEKQAVATKLSA |
| 13_2688  | DFM   | LSI     | AGT    | IVAF  | KYG   | PLMTLVITATVPIAMFIMRALSQMLEKAVRTQKEKQAVATKLSA |
| 14_6406  | DFM   | LSI     | AGT    | IVAF  | KYG   | PLMTLVITATVPIAMFIMRALSQMLEKAVRTQKEKQAVATKLSA |
| 15_9419  | DFM   | LSI     | AGT    | IVAF  | KYG   | PLMTLVITATVPIAMFIMRALSQMLEKAVRTQKEKQAVATKLSA |
| 16_8507  | DFM   | LSI     | AGT    | IVAF  | KYG   | PLMTLVITATVPIAMFIMRALSQMLEKAVRTQKEKQAVATKLSA |
| 17_5884  | DFM   | LSI     | AGT    | IVAF  | KYG   | PLMTLVITATVPIAMFIMRALSQMLEKAVRTQKEKQAVATKLSA |
| 18_2670  | DFM   | LSI     | AGT    | IVAF  | KYG   | PLMTLVITATVPIAMFIMRALSQMLEKAVRTQKEKQAVATKLSA |
| 19_5172  | DFM   | LSI     | AGT    | IVAF  | KYG   | PLMTLVITATVPIAMFIMRALSQMLEKAVRTQKEKQAVATKLSA |
| 20_8057  | DFM   | LSI     | AGT    | IVAF  | KYG   | PLMTLVITATVPIAMFIMRALSQMLEKAVRTQKEKQAVATKLSA |
| 21_4920  | SEDEL | DVDM    | SGKSFY | IPEPK | TTS   | SFGALGRMSFVPIPGTNGPIYTPNQPGSGAYLQLHR         |
| 22_6393  | DFM   | LSI     | AGT    | IVAF  | KYG   | PLMTLVITATVPIAMFIMRALSQMLEKAVRTQKEKQAVATKLSA |
| 23_8263  | DFM   | LSI     | AGT    | IVAF  | KYG   | PLMTLVITATVPIAMFIMRALSQMLEKAVRTQKEKQAVATKLSA |
| 24_8248  | DFM   | LSI     | AGT    | IVAF  | KYG   | PLMTLVITATVPIAMFIMRALSQMLEKAVRTQKEKQAVATKLSA |
| 25_6733  | DFM   | LSI     | AGT    | IVAF  | KYG   | PLMTLVITATVPIAMFIMRALSQMLEKAVRTQKEKQAVATKLSA |
| 26_2277  | DFM   | LSI     | AGT    | IVAF  | KYG   | PLMTLVITATVPIAMFIMRALSQMLEKAVRTQKEKQAVATKLSA |
| 27_2623  | DFM   | LSI     | AGT    | IVAF  | KYG   | PLMTLVITATVPIAMFIMRALSQMLEKAVRTQKEKQAVATKLSA |
| 28_7413  | DFM   | LSI     | AGT    | IVAF  | KYG   | PLMTLVITATVPIAMFIMRALSQMLEKAVRTQKEKQAVATKLSA |
| 29_8980  | DFM   | LSI     | AGT    | IVAF  | KYG   | PLMTLVITATVPIAMFIMRALSQMLEKAVRTQKEKQAVATKLSA |
| 30_8706  | DFM   | LSI     | AGT    | IVAF  | KYG   | PLMTLVITATVPIAMFIMRALSQMLEKAVRTQKEKQAVATKLSA |
| 31_6378  | DFM   | LSI     | AGT    | IVAF  | KYG   | PLMTLVITATVPIAMFIMRALSQMLEKAVRTQKEKQAVATKLSA |
| 32_4679  | DFM   | LSI     | AGT    | IVAF  | KYG   | PLMTLVITATVPIAMFIMRALSQMLEKAVRTQKEKQAVATKLSA |
| 33_2437  | DFM   | LSI     | AGT    | IVAF  | KYG   | PLMTLVITATVPIAMFIMRALSQMLEKAVRTQKEKQAVATKLSA |
| 34_9700  | DFM   | LSI     | AGT    | IVAF  | KYG   | PLMTLVITATVPIAMFIMRALSQMLEKAVRTQKEKQAVATKLSA |
| 35_10218 | DFM   | LSI     | AGT    | IVAF  | KYG   | PLMTLVITATVPIAMFIMRALSQMLEKAVRTQKEKQAVATKLSA |
| 36_2652  | DFM   | LSI     | AGT    | IVAF  | KYG   | PLMTLVITATVPIAMFIMRALSQMLEKAVRTQKEKQAVATKLSA |
| 37_5779  | DFM   | LSI     | AGT    | IVAF  | KYG   | PLMTLVITATVPIAMFIMRALSQMLEKAVRTQKEKQAVATKLSA |
| 38_654   | DFM   | LSI     | AGT    | IVAF  | KYG   | PLMTLVITATVPIAMFIMRALSQMLEKAVRTQKEKQAVATKLSA |
| 39_4879  | DFM   | LSI     | AGT    | IVAF  | KYG   | PLMTLVITATVPIAMFIMRALSQMLEKAVRTQKEKQAVATKLSA |
| 40_8113  | DFM   | LSI     | AGT    | IVAF  | KYG   | PLMTLVITATVPIAMFIMRALSQMLEKAVRTQKEKQAVATKLSA |
| 41_1767  | DFM   | LSI     | AGT    | IVAF  | KYG   | PLMTLVITATVPIAMFIMRALSQMLEKAVRTQKEKQAVATKLSA |
| 42_8428  | DFM   | LSI     | AGT    | IVAF  | KYG   | PLMTLVITATVPIAMFIMRALSQMLEKAVRTQKEKQAVATKLSA |
| 43_9819  | DFM   | LSI     | AGT    | IVAF  | KYG   | PLMTLVITATVPIAMFIMRALSQMLEKAVRTQKEKQAVATKLSA |
| 44_5569  | DFM   | LSI     | AGT    | IVAF  | KYG   | PLMTLVITATVPIAMFIMRALSQMLEKAVRTQKEKQAVATKLSA |
| 45_4189  | DFM   | LSI     | AGT    | IVAF  | KYG   | PLMTLVITATVPIAMFIMRALSQMLEKAVRTQKEKQAVATKLSA |
| 46_1027  | DFM   | LSI     | AGT    | IVAF  | KYG   | PLMTLVITATVPIAMFIMRALSQMLEKAVRTQKEKQAVATKLSA |
| 47_5048  | DFM   | LSI     | AGT    | IVAF  | KYG   | PLMTLVITATVPIAMFIMRALSQMLEKAVRTQKEKQAVATKLSA |
| 48_10124 | DFM   | LSI     | AGT    | IVAF  | KYG   | PLMTLVITATVPIAMFIMRALSQMLEKAVRTQKEKQAVATKLSA |
| 49_7151  | DFM   | LSI     | AGT    | IVAF  | KYG   | PLMTLVITATVPIAMFIMRALSQMLEKAVRTQKEKQAVATKLSA |
| 50_3695  | DFM   | LSI     | AGT    | IVAF  | KYG   | PLMTLVITATVPIAMFIMRALSQMLEKAVRTQKEKQAVATKLSA |
| 51_364   | DFM   | LSI     | AGT    | IVAF  | KYG   | PLMTLVITATVPIAMFIMRALSQMLEKAVRTQKEKQAVATKLSA |
| 52_242   | DFM   | LSI     | AGT    | IVAF  | KYG   | PLMTLVITATVPIAMFIMRALSQMLEKAVRTQKEKQAVATKLSA |
| 53_5225  | DFM   | LSI     | AGT    | IVAF  | KYG   | PLMTLVITATVPIAMFIMRALSQMLEKAVRTQKEKQAVATKLSA |
| 54_1635  | DFM   | LSI     | AGT    | IVAF  | KYG   | PLMTLVITATVPIAMFIMRALSQMLEKAVRTQKEKQAVATKLSA |
| 55_5766  | DFM   | LSI     | AGT    | IVAF  | KYG   | PLMTLVITATVPIAMFIMRALSQMLEKAVRTQKEKQAVATKLSA |
| 56_1557  | DFM   | LSI     | AGT    | IVAF  | KYG   | PLMTLVITATVPIAMFIMRALSQMLEKAVRTQKEKQAVATKLSA |
| 57_10137 | DFM   | LSI     | AGT    | IVAF  | KYG   | PLMTLVITATVPIAMFIMRALSQMLEKAVRTQKEKQAVATKLSA |
| 58_10525 | DFM   | LSI     | AGT    | IVAF  | KYG   | PLMTLVITATVPIAMFIMRALSQMLEKAVRTQKEKQAVATKLSA |
| 59_3457  | DFM   | LSI     | AGT    | IVAF  | KYG   | PLMTLVITATVPIAMFIMRALSQMLEKAVRTQKEKQAVATKLSA |
| 60_8244  | DFM   | LSI     | AGT    | IVAF  | KYG   | PLMTLVITATVPIAMFIMRALSQMLEKAVRTQKEKQAVATKLSA |
| 61_7964  | DFM   | LSI     | AGT    | IVAF  | KYG   | PLMTLVITATVPIAMFIMRALSQMLEKAVRTQKEKQAVATKLSA |
| 62_4413  | DFM   | LSI     | AGT    | IVAF  | KYG   | PLMTLVITATVPIAMFIMRALSQMLEKAVRTQKEKQAVATKLSA |
| 63_6958  | DFM   | LSI     | AGT    | IVAF  | KYG   | PLMTLVITATVPIAMFIMRALSQMLEKAVRTQKEKQAVATKLSA |
| 64_5997  | QDAE  | VSKP    | RRGS   | IDLI  | QARGL | SALANRSPVKRPLPQGGRI                          |
| 65_8711  | DFM   | LSI     | AGT    | IVAF  | KYG   | PLMTLVITATVPIAMFIMRALSQMLEKAVRTQKEKQAVATKLSA |
| 66_9925  | DFM   | LSI     | AGT    | IVAF  | KYG   | PLMTLVITATVPIAMFIMRALSQMLEKAVRTQKEKQAVATKLSA |
| 67_10374 | DFM   | LSI     | AGT    | IVAF  | KYG   | PLMTLVITATVPIAMFIMRALSQMLEKAVRTQKEKQAVATKLSA |
| 68_3713  | DFM   | LSI     | AGT    | IVAF  | KYG   | PLMTLVITATVPIAMFIMRALSQMLEKAVRTQKEKQAVATKLSA |
| 69_4511  | DFM   | LSI     | AGT    | IVAF  | KYG   | PLMTLVITATVPIAMFIMRALSQMLEKAVRTQKEKQAVATKLSA |
| 70_6201  | DFM   | LSI     | AGT    | IVAF  | KYG   | PLMTLVITATVPIAMFIMRALSQMLEKAVRTQKEKQAVATKLSA |
| 71_3261  | DFM   | LSI     | AGT    | IVAF  | KYG   | PLMTLVITATVPIAMFIMRALSQMLEKAVRTQKEKQAVATKLSA |
| 72_8516  | DFM   | LSI     | AGT    | IVAF  | KYG   | PLMTLVITATVPIAMFIMRALSQMLEKAVRTQKEKQAVATKLSA |
| 73_9295  | DFM   | LSI     | AGT    | IVAF  | KYG   | PLMTLVITATVPIAMFIMRALSQMLEKAVRTQKEKQAVATKLSA |
| 74_809   | DFM   | LSI     | AGT    | IVAF  | KYG   | PLMTLVITATVPIAMFIMRALSQMLEKAVRTQKEKQAVATKLSA |
| 75_7282  | DFM   | LSI     | AGT    | IVAF  | KYG   | PLMTLVITATVPIAMFIMRALSQMLEKAVRTQKEKQAVATKLSA |
| 76_4910  | DFM   | LSI     | AGT    | IVAF  | KYG   | PLMTLVITATVPIAMFIMRALSQMLEKAVRTQKEKQAVATKLSA |
| 77_10912 | DFM   | LSI     | AGT    | IVAF  | KYG   | PLMTLVITATVPIAMFIMRALSQMLEKAVRTQKEKQAVATKLSA |
| 78_4020  | DFM   | LSI     | AGT    | IVAF  | KYG   | PLMTLVITATVPIAMFIMRALSQMLEKAVRTQKEKQAVATKLSA |
| 79_6703  | DFM   | LSI     | AGT    | IVAF  | KYG   | PLMTLVITATVPIAMFIMRALSQMLEKAVRTQKEKQAVATKLSA |
| 80_8619  | DFM   | LSI     | AGT    | IVAF  | KYG   | PLMTLVITATVPIAMFIMRALSQMLEKAVRTQKEKQAVATKLSA |
| 81_4126  | DFM   | LSI     | AGT    | IVAF  | KYG   | PLMTLVITATVPIAMFIMRALSQMLEKAVRTQKEKQAVATKLSA |
| 82_1363  | DFM   | LSI     | AGT    | IVAF  | KYG   | PLMTLVITATVPIAMFIMRALSQMLEKAVRTQKEKQAVATKLSA |
| 83_5813  | DFM   | LSI     | AGT    | IVAF  | KYG   | PLMTLVITATVPIAMFIMRALSQMLEKAVRTQKEKQAVATKLSA |
| 84_2044  | DFM   | LSI     | AGT    | IVAF  | KYG   | PLMTLVITATVPIAMFIMRALSQMLEKAVRTQKEKQAVATKLSA |
| 85_7617  | DFM   | LSI     | AGT    | IVAF  | KYG   | PLMTLVITATVPIAMFIMRALSQMLEKAVRTQKEKQAVATKLSA |
| 86_1530  | DFM   | LSI     | AGT    | IVAF  | KYG   | PLMTLVITATVPIAMFIMRALSQMLEKAVRTQKEKQAVATKLSA |
| 87_1890  | DFM   | LSI     | AGT    | IVAF  | KYG   | PLMTLVITATVPIAMFIMRALSQMLEKAVRTQKEKQAVATKLSA |
| 88_7049  | DFM   | LSI     | AGT    | IVAF  | KYG   | PLMTLVITATVPIAMFIMRALSQMLEKAVRTQKEKQAVATKLSA |
| 89_440   | DFM   | LSI     | AGT    | IVAF  | KYG   | PLMTLVITATVPIAMFIMRALSQMLEKAVRTQKEKQAVATKLSA |
| 90_4331  | DFM   | LSI     | AGT    | IVAF  | KYG   | PLMTLVITATVPIAMFIMRALSQMLEKAVRTQKEKQAVATKLSA |



|          | 310                       | 320                      | 330            | 340 | 350 | 360 |
|----------|---------------------------|--------------------------|----------------|-----|-----|-----|
| 1_1896   | AAITGIDLVKKVYNSHEHELHNFR  | LAAREAGKHARVQTMWNALQAAFI | KIYMAVVFLSGFF  |     |     |     |
| 2_4785   | AAITGIDLVKKVYNSHEHELHNFR  | LAAREAGKHARVQTMWNALQAAFI | KIYMAVVFLSGFF  |     |     |     |
| 3_3653   | AAITGIDLVKKVYNSHEHELHNFR  | LAAREAGKHARVQTMWNALQAAFI | KIYMAVVFLSGFF  |     |     |     |
| 4_8157   | AAITGIDLVKKVYNSHEHELHNFR  | LAAREAGKHARVQTMWNALQAAFI | KIYMAVVFLSGFF  |     |     |     |
| 5_752    | AAITGIDLVKKVYNSHEHELHNFR  | LAAREAGKHARVQTMWNALQAAFI | KIYMAVVFLSGFF  |     |     |     |
| 6_8853   | AAITGIDLVKKVYNSHEHELHNFR  | LAAREAGKHARVQTMWNALQAAFI | KIYMAVVFLSGFF  |     |     |     |
| 7_4015   | ALLQSTIASLPPQGLDTLVGPGGQ  | SLSGGQRQRVALARARLRDTPVL  | ILDEVTSGLDPKSK |     |     |     |
| 8_2020   | AAITGIDLVKKVYNSHEHELHNFR  | LAAREAGKHARVQTMWNALQAAFI | KIYMAVVFLSGFF  |     |     |     |
| 9_1829   | AAITGIDLVKKVYNSHEHELHNFR  | LAAREAGKHARVQTMWNALQAAFI | KIYMAVVFLSGFF  |     |     |     |
| 10_6452  | AAITGIDLVKKVYNSHEHELHNFR  | LAAREAGKHARVQTMWNALQAAFI | KIYMAVVFLSGFF  |     |     |     |
| 11_8627  | AAITGIDLVKKVYNSHEHELHNFR  | LAAREAGKHARVQTMWNALQAAFI | KIYMAVVFLSGFF  |     |     |     |
| 12_6118  | AAITGIDLVKKVYNSHEHELHNFR  | LAAREAGKHARVQTMWNALQAAFI | KIYMAVVFLSGFF  |     |     |     |
| 13_2688  | AAITGIDLVKKVYNSHEHELHNFR  | LAAREAGKHARVQTMWNALQAAFI | KIYMAVVFLSGFF  |     |     |     |
| 14_6406  | AAITGIDLVKKVYNSHEHELHNFR  | LAAREAGKHARVQTMWNALQAAFI | KIYMAVVFLSGFF  |     |     |     |
| 15_9419  | AAITGIDLVKKVYNSHEHELHNFR  | LAAREAGKHARVQTMWNALQAAFI | KIYMAVVFLSGFF  |     |     |     |
| 16_8507  | AAITGIDLVKKVYNSHEHELHNFR  | LAAREAGKHARVQTMWNALQAAFI | KIYMAVVFLSGFF  |     |     |     |
| 17_5884  | AAITGIDLVKKVYNSHEHELHNFR  | LAAREAGKHARVQTMWNALQAAFI | KIYMAVVFLSGFF  |     |     |     |
| 18_2670  | AAITGIDLVKKVYNSHEHELHNFR  | LAAREAGKHARVQTMWNALQAAFI | KIYMAVVFLSGFF  |     |     |     |
| 19_5172  | AAITGIDLVKKVYNSHEHELHNFR  | LAAREAGKHARVQTMWNALQAAFI | KIYMAVVFLSGFF  |     |     |     |
| 20_8057  | AAITGIDLVKKVYNSHEHELHNFR  | LAAREAGKHARVQTMWNALQAAFI | KIYMAVVFLSGFF  |     |     |     |
| 21_4920  | SPRHRHREQGRPNWQDAEVSKPRR  | GSIDLIQARGLSALANRSPVKRPL | PQGGRIQGVLR    |     |     |     |
| 22_6393  | AAITGIDLVKKVYNSHEHELHNFR  | LAAREAGKHARVQTMWNALQAAFI | KIYMAVVFLSGFF  |     |     |     |
| 23_8263  | AAITGIDLVKKVYNSHEHELHNFR  | LAAREAGKHARVQTMWNALQAAFI | KIYMAVVFLSGFF  |     |     |     |
| 24_8248  | AAITGIDLVKKVYNSHEHELHNFR  | LAAREAGKHARVQTMWNALQAAFI | KIYMAVVFLSGFF  |     |     |     |
| 25_6733  | AAITGIDLVKKVYNSHEHELHNFR  | LAAREAGKHARVQTMWNALQAAFI | KIYMAVVFLSGFF  |     |     |     |
| 26_2277  | AAITGIDLVKKVYNSHEHELHNFR  | LAAREAGKHARVQTMWNALQAAFI | KIYMAVVFLSGFF  |     |     |     |
| 27_2623  | AAITGIDLVKKVYNSHEHELHNFR  | LAAREAGKHARVQTMWNALQAAFI | KIYMAVVFLSGFF  |     |     |     |
| 28_7413  | AAITGIDLVKKVYNSHEHELHNFR  | LAAREAGKHARVQTMWNALQAAFI | KIYMAVVFLSGFF  |     |     |     |
| 29_8980  | AAITGIDLVKKVYNSHEHELHNFR  | LAAREAGKHARVQTMWNALQAAFI | KIYMAVVFLSGFF  |     |     |     |
| 30_8706  | AAITGIDLVKKVYNSHEHELHNFR  | LAAREAGKHARVQTMWNALQAAFI | KIYMAVVFLSGFF  |     |     |     |
| 31_6378  | AAITGIDLVKKVYNSHEHELHNFR  | LAAREAGKHARVQTMWNALQAAFI | KIYMAVVFLSGFF  |     |     |     |
| 32_4679  | AAITGIDLVKKVYNSHEHELHNFR  | LAAREAGKHARVQTMWNALQAAFI | KIYMAVVFLSGFF  |     |     |     |
| 33_2437  | AAITGIDLVKKVYNSHEHELHNFR  | LAAREAGKHARVQTMWNALQAAFI | KIYMAVVFLSGFF  |     |     |     |
| 34_9700  | AAITGIDLVKKVYNSHEHELHNFR  | LAAREAGKHARVQTMWNALQAAFI | KIYMAVVFLSGFF  |     |     |     |
| 35_10218 | AAITGIDLVKKVYNSHEHELHNFR  | LAAREAGKHARVQTMWNALQAAFI | KIYMAVVFLSGFF  |     |     |     |
| 36_2652  | AAITGIDLVKKVYNSHEHELHNFR  | LAAREAGKHARVQTMWNALQAAFI | KIYMAVVFLSGFF  |     |     |     |
| 37_5779  | AAITGIDLVKKVYNSHEHELHNFR  | LAAREAGKHARVQTMWNALQAAFI | KIYMAVVFLSGFF  |     |     |     |
| 38_654   | AAITGIDLVKKVYNSHEHELHNFR  | LAAREAGKHARVQTMWNALQAAFI | KIYMAVVFLSGFF  |     |     |     |
| 39_4879  | AAITGIDLVKKVYNSHEHELHNFR  | LAAREAGKHARVQTMWNALQAAFI | KIYMAVVFLSGFF  |     |     |     |
| 40_8113  | AAITGIDLVKKVYNSHEHELHNFR  | LAAREAGKHARVQTMWNALQAAFI | KIYMAVVFLSGFF  |     |     |     |
| 41_1767  | AAITGIDLVKKVYNSHEHELHNFR  | LAAREAGKHARVQTMWNALQAAFI | KIYMAVVFLSGFF  |     |     |     |
| 42_8428  | AAITGIDLVKKVYNSHEHELHNFR  | LAAREAGKHARVQTMWNALQAAFI | KIYMAVVFLSGFF  |     |     |     |
| 43_9819  | AAITGIDLVKKVYNSHEHELHNFR  | LAAREAGKHARVQTMWNALQAAFI | KIYMAVVFLSGFF  |     |     |     |
| 44_5569  | AAITGIDLVKKVYNSHEHELHNFR  | LAAREAGKHARVQTMWNALQAAFI | KIYMAVVFLSGFF  |     |     |     |
| 45_4189  | AAITGIDLVKKVYNSHEHELHNFR  | LAAREAGKHARVQTMWNALQAAFI | KIYMAVVFLSGFF  |     |     |     |
| 46_1027  | AAITGIDLVKKVYNSHEHELHNFR  | LAAREAGKHARVQTMWNALQAAFI | KIYMAVVFLSGFF  |     |     |     |
| 47_5048  | AAITGIDLVKKVYNSHEHELHNFR  | LAAREAGKHARVQTMWNALQAAFI | KIYMAVVFLSGFF  |     |     |     |
| 48_10124 | AAITGIDLVKKVYNSHEHELHNFR  | LAAREAGKHARVQTMWNALQAAFI | KIYMAVVFLSGFF  |     |     |     |
| 49_7151  | AAITGIDLVKKVYNSHEHELHNFR  | LAAREAGKHARVQTMWNALQAAFI | KIYMAVVFLSGFF  |     |     |     |
| 50_3695  | AAITGIDLVKKVYNSHEHELHNFR  | LAAREAGKHARVQTMWNALQAAFI | KIYMAVVFLSGFF  |     |     |     |
| 51_364   | AAITGIDLVKKVYNSHEHELHNFR  | LAAREAGKHARVQTMWNALQAAFI | KIYMAVVFLSGFF  |     |     |     |
| 52_242   | AAITGIDLVKKVYNSHEHELHNFR  | LAAREAGKHARVQTMWNALQAAFI | KIYMAVVFLSGFF  |     |     |     |
| 53_5225  | AAITGIDLVKKVYNSHEHELHNFR  | LAAREAGKHARVQTMWNALQAAFI | KIYMAVVFLSGFF  |     |     |     |
| 54_1635  | AAITGIDLVKKVYNSHEHELHNFR  | LAAREAGKHARVQTMWNALQAAFI | KIYMAVVFLSGFF  |     |     |     |
| 55_5766  | AAITGIDLVKKVYNSHEHELHNFR  | LAAREAGKHARVQTMWNALQAAFI | KIYMAVVFLSGFF  |     |     |     |
| 56_1557  | AAITGIDLVKKVYNSHEHELHNFR  | LAAREAGKHARVQTMWNALQAAFI | KIYMAVVFLSGFF  |     |     |     |
| 57_10137 | AAITGIDLVKKVYNSHEHELHNFR  | LAAREAGKHARVQTMWNALQAAFI | KIYMAVVFLSGFF  |     |     |     |
| 58_10525 | AAITGIDLVKKVYNSHEHELHNFR  | LAAREAGKHARVQTMWNALQAAFI | KIYMAVVFLSGFF  |     |     |     |
| 59_3457  | AAITGIDLVKKVYNSHEHELHNFR  | LAAREAGKHARVQTMWNALQAAFI | KIYMAVVFLSGFF  |     |     |     |
| 60_8244  | AAITGIDLVKKVYNSHEHELHNFR  | LAAREAGKHARVQTMWNALQAAFI | KIYMAVVFLSGFF  |     |     |     |
| 61_7964  | AAITGIDLVKKVYNSHEHELHNFR  | LAAREAGKHARVQTMWNALQAAFI | KIYMAVVFLSGFF  |     |     |     |
| 62_4413  | AAITGIDLVKKVYNSHEHELHNFR  | LAAREAGKHARVQTMWNALQAAFI | KIYMAVVFLSGFF  |     |     |     |
| 63_6958  | AAITGIDLVKKVYNSHEHELHNFR  | LAAREAGKHARVQTMWNALQAAFI | KIYMAVVFLSGFF  |     |     |     |
| 64_5997  | PFRDHDKGVEVREIREAIGKGTGAG | KRGVTKRQARRGKKDGPDEEATNT | TGHMPAYQ       |     |     |     |
| 65_8711  | AAITGIDLVKKVYNSHEHELHNFR  | LAAREAGKHARVQTMWNALQAAFI | KIYMAVVFLSGFF  |     |     |     |
| 66_9925  | AAITGIDLVKKVYNSHEHELHNFR  | LAAREAGKHARVQTMWNALQAAFI | KIYMAVVFLSGFF  |     |     |     |
| 67_10374 | AAITGIDLVKKVYNSHEHELHNFR  | LAAREAGKHARVQTMWNALQAAFI | KIYMAVVFLSGFF  |     |     |     |
| 68_3713  | AAITGIDLVKKVYNSHEHELHNFR  | LAAREAGKHARVQTMWNALQAAFI | KIYMAVVFLSGFF  |     |     |     |
| 69_4511  | AAITGIDLVKKVYNSHEHELHNFR  | LAAREAGKHARVQTMWNALQAAFI | KIYMAVVFLSGFF  |     |     |     |
| 70_6201  | AAITGIDLVKKVYNSHEHELHNFR  | LAAREAGKHARVQTMWNALQAAFI | KIYMAVVFLSGFF  |     |     |     |
| 71_3261  | AAITGIDLVKKVYNSHEHELHNFR  | LAAREAGKHARVQTMWNALQAAFI | KIYMAVVFLSGFF  |     |     |     |
| 72_8516  | AAITGIDLVKKVYNSHEHELHNFR  | LAAREAGKHARVQTMWNALQAAFI | KIYMAVVFLSGFF  |     |     |     |
| 73_9295  | AAITGIDLVKKVYNSHEHELHNFR  | LAAREAGKHARVQTMWNALQAAFI | KIYMAVVFLSGFF  |     |     |     |
| 74_809   | AAITGIDLVKKVYNSHEHELHNFR  | LAAREAGKHARVQTMWNALQAAFI | KIYMAVVFLSGFF  |     |     |     |
| 75_7282  | AAITGIDLVKKVYNSHEHELHNFR  | LAAREAGKHARVQTMWNALQAAFI | KIYMAVVFLSGFF  |     |     |     |
| 76_4910  | AAITGIDLVKKVYNSHEHELHNFR  | LAAREAGKHARVQTMWNALQAAFI | KIYMAVVFLSGFF  |     |     |     |
| 77_10912 | AAITGIDLVKKVYNSHEHELHNFR  | LAAREAGKHARVQTMWNALQAAFI | KIYMAVVFLSGFF  |     |     |     |
| 78_4020  | AAITGIDLVKKVYNSHEHELHNFR  | LAAREAGKHARVQTMWNALQAAFI | KIYMAVVFLSGFF  |     |     |     |
| 79_6703  | AAITGIDLVKKVYNSHEHELHNFR  | LAAREAGKHARVQTMWNALQAAFI | KIYMAVVFLSGFF  |     |     |     |
| 80_8619  | AAITGIDLVKKVYNSHEHELHNFR  | LAAREAGKHARVQTMWNALQAAFI | KIYMAVVFLSGFF  |     |     |     |
| 81_4126  | AAITGIDLVKKVYNSHEHELHNFR  | LAAREAGKHARVQTMWNALQAAFI | KIYMAVVFLSGFF  |     |     |     |
| 82_1363  | AAITGIDLVKKVYNSHEHELHNFR  | LAAREAGKHARVQTMWNALQAAFI | KIYMAVVFLSGFF  |     |     |     |
| 83_5813  | AAITGIDLVKKVYNSHEHELHNFR  | LAAREAGKHARVQTMWNALQAAFI | KIYMAVVFLSGFF  |     |     |     |
| 84_2044  | AAITGIDLVKKVYNSHEHELHNFR  | LAAREAGKHARVQTMWNALQAAFI | KIYMAVVFLSGFF  |     |     |     |
| 85_7617  | AAITGIDLVKKVYNSHEHELHNFR  | LAAREAGKHARVQTMWNALQAAFI | KIYMAVVFLSGFF  |     |     |     |
| 86_1530  | AAITGIDLVKKVYNSHEHELHNFR  | LAAREAGKHARVQTMWNALQAAFI | KIYMAVVFLSGFF  |     |     |     |
| 87_1890  | AAITGIDLVKKVYNSHEHELHNFR  | LAAREAGKHARVQTMWNALQAAFI | KIYMAVVFLSGFF  |     |     |     |
| 88_7049  | AAITGIDLVKKVYNSHEHELHNFR  | LAAREAGKHARVQTMWNALQAAFI | KIYMAVVFLSGFF  |     |     |     |
| 89_440   | AAITGIDLVKKVYNSHEHELHNFR  | LAAREAGKHARVQTMWNALQAAFI | KIYMAVVFLSGFF  |     |     |     |
| 90_4331  | AAITGIDLVKKVYNSHEHELHNFR  | LAAREAGKHARVQTMWNALQAAFI | KIYMAVVFLSGFF  |     |     |     |

|          | 370                                                           | 380 | 390 | 400 | 410 | 420 |
|----------|---------------------------------------------------------------|-----|-----|-----|-----|-----|
| 1_1896   | FGIYQVDRGNMSAGDVITTFYAALSTFEGVQGLGPHILSLVRGMQASKALKSVVSDRVVE  |     |     |     |     |     |
| 2_4785   | FGIYQVDRGNMSAGDVITTFYAALSTFEGVQGLGPHILSLVRGMQASKALKSVVSDRVVE  |     |     |     |     |     |
| 3_3653   | FGIYQVDRGNMSAGDVITTFYAALSTFEGVQGLGPHILSLVRGMQASKALKSVVSDRVVE  |     |     |     |     |     |
| 4_8157   | FGIYQVDRGNMSAGDVITTFYAALSTFEGVQGLGPHILSLVRGMQASKALKSVVSDRVVE  |     |     |     |     |     |
| 5_752    | FGIYQVDRGNMSAGDVITTFYAALSTFEGVQGLGPHILSLVRGMQASKALKSVVSDRVVE  |     |     |     |     |     |
| 6_8853   | FGIYQVDRGNMSAGDVITTFYAALSTFEGVQGLGPHILSLVRGMQASKALKSVVSDRVVE  |     |     |     |     |     |
| 7_4015   | LMIMDAIRYWRSGRTTIVITHDISQVGDDDYVYVMDKAEVREEGLCKQLQSNRDGYFLQL  |     |     |     |     |     |
| 8_2020   | FGIYQVDRGNMSAGDVITTFYAALSTFEGVQGLGPHILSLVRGMQASKALKSVVSDRVVE  |     |     |     |     |     |
| 9_1829   | FGIYQVDRGNMSAGDVITTFYAALSTFEGVQGLGPHILSLVRGMQASKALKSVVSDRVVE  |     |     |     |     |     |
| 10_6452  | FGIYQVDRGNMSAGDVITTFYAALSTFEGVQGLGPHILSLVRGMQASKALKSVVSDRVVE  |     |     |     |     |     |
| 11_8627  | FGIYQVDRGNMSAGDVITTFYAALSTFEGVQGLGPHILSLVRGMQASKALKSVVSDRVVE  |     |     |     |     |     |
| 12_6118  | FGIYQVDRGNMSAGDVITTFYAALSTFEGVQGLGPHILSLVRGMQASKALKSVVSDRVVE  |     |     |     |     |     |
| 13_2688  | FGIYQVDRGNMSAGDVITTFYAALSTFEGVQGLGPHILSLVRGMQASKALKSVVSDRVVE  |     |     |     |     |     |
| 14_6406  | FGIYQVDRGNMSAGDVITTFYAALSTFEGVQGLGPHILSLVRGMQASKALKSVVSDRVVE  |     |     |     |     |     |
| 15_9419  | FGIYQVDRGNMSAGDVITTFYAALSTFEGVQGLGPHILSLVRGMQASKALKSVVSDRVVE  |     |     |     |     |     |
| 16_8507  | FGIYQVDRGNMSAGDVITTFYAALSTFEGVQGLGPHILSLVRGMQASKALKSVVSDRVVE  |     |     |     |     |     |
| 17_5884  | FGIYQVDRGNMSAGDVITTFYAALSTFEGVQGLGPHILSLVRGMQASKALKSVVSDRVVE  |     |     |     |     |     |
| 18_2670  | FGIYQVDRGNMSAGDVITTFYAALSTFEGVQGLGPHILSLVRGMQASKALKSVVSDRVVE  |     |     |     |     |     |
| 19_5172  | FGIYQVDRGNMSAGDVITTFYAALSTFEGVQGLGPHILSLVRGMQASKALKSVVSDRVVE  |     |     |     |     |     |
| 20_8057  | FGIYQVDRGNMSAGDVITTFYAALSTFEGVQGLGPHILSLVRGMQASKALKSVVSDRVVE  |     |     |     |     |     |
| 21_4920  | RLSTRSSPIEDVEMSPFRDHDKGKVEVVERERIEAIGKGTGAGKRGVTKRQARRGKKDGP  |     |     |     |     |     |
| 22_6393  | FGIYQVDRGNMSAGDVITTFYAALSTFEGVQGLGPHILSLVRGMQASKALKSVVSDRVVE  |     |     |     |     |     |
| 23_8263  | FGIYQVDRGNMSAGDVITTFYAALSTFEGVQGLGPHILSLVRGMQASKALKSVVSDRVVE  |     |     |     |     |     |
| 24_8248  | FGIYQVDRGNMSAGDVITTFYAALSTFEGVQGLGPHILSLVRGMQASKALKSVVSDRVVE  |     |     |     |     |     |
| 25_6733  | FGIYQVDRGNMSAGDVITTFYAALSTFEGVQGLGPHILSLVRGMQASKALKSVVSDRVVE  |     |     |     |     |     |
| 26_2277  | FGIYQVDRGNMSAGDVITTFYAALSTFEGVQGLGPHILSLVRGMQASKALKSVVSDRVVE  |     |     |     |     |     |
| 27_2623  | FGIYQVDRGNMSAGDVITTFYAALSTFEGVQGLGPHILSLVRGMQASKALKSVVSDRVVE  |     |     |     |     |     |
| 28_7413  | FGIYQVDRGNMSAGDVITTFYAALSTFEGVQGLGPHILSLVRGMQASKALKSVVSDRVVE  |     |     |     |     |     |
| 29_8980  | FGIYQVDRGNMSAGDVITTFYAALSTFEGVQGLGPHILSLVRGMQASKALKSVVSDRVVE  |     |     |     |     |     |
| 30_8706  | FGIYQVDRGNMSAGDVITTFYAALSTFEGVQGLGPHILSLVRGMQASKALKSVVSDRVVE  |     |     |     |     |     |
| 31_6378  | FGIYQVDRGNMSAGDVITTFYAALSTFEGVQGLGPHILSLVRGMQASKALKSVVSDRVVE  |     |     |     |     |     |
| 32_4679  | FGIYQVDRGNMSAGDVITTFYAALSTFEGVQGLGPHILSLVRGMQASKALKSVVSDRVVE  |     |     |     |     |     |
| 33_2437  | FGIYQVDRGNMSAGDVITTFYAALSTFEGVQGLGPHILSLVRGMQASKALKSVVSDRVVE  |     |     |     |     |     |
| 34_9700  | FGIYQVDRGNMSAGDVITTFYAALSTFEGVQGLGPHILSLVRGMQASKALKSVVSDRVVE  |     |     |     |     |     |
| 35_10218 | FGIYQVDRGNMSAGDVITTFYAALSTFEGVQGLGPHILSLVRGMQASKALKSVVSDRVVE  |     |     |     |     |     |
| 36_2652  | FGIYQVDRGNMSAGDVITTFYAALSTFEGVQGLGPHILSLVRGMQASKALKSVVSDRVVE  |     |     |     |     |     |
| 37_5779  | FGIYQVDRGNMSAGDVITTFYAALSTFEGVQGLGPHILSLVRGMQASKALKSVVSDRVVE  |     |     |     |     |     |
| 38_654   | FGIYQVDRGNMSAGDVITTFYAALSTFEGVQGLGPHILSLVRGMQASKALKSVVSDRVVE  |     |     |     |     |     |
| 39_4879  | FGIYQVDRGNMSAGDVITTFYAALSTFEGVQGLGPHILSLVRGMQASKALKSVVSDRVVE  |     |     |     |     |     |
| 40_8113  | FGIYQVDRGNMSAGDVITTFYAALSTFEGVQGLGPHILSLVRGMQASKALKSVVSDRVVE  |     |     |     |     |     |
| 41_1767  | FGIYQVDRGNMSAGDVITTFYAALSTFEGVQGLGPHILSLVRGMQASKALKSVVSDRVVE  |     |     |     |     |     |
| 42_8428  | FGIYQVDRGNMSAGDVITTFYAALSTFEGVQGLGPHILSLVRGMQASKALKSVVSDRVVE  |     |     |     |     |     |
| 43_9819  | FGIYQVDRGNMSAGDVITTFYAALSTFEGVQGLGPHILSLVRGMQASKALKSVVSDRVVE  |     |     |     |     |     |
| 44_5569  | FGIYQVDRGNMSAGDVITTFYAALSTFEGVQGLGPHILSLVRGMQASKALKSVVSDRVVE  |     |     |     |     |     |
| 45_4189  | FGIYQVDRGNMSAGDVITTFYAALSTFEGVQGLGPHILSLVRGMQASKALKSVVSDRVVE  |     |     |     |     |     |
| 46_1027  | FGIYQVDRGNMSAGDVITTFYAALSTFEGVQGLGPHILSLVRGMQASKALKSVVSDRVVE  |     |     |     |     |     |
| 47_5048  | FGIYQVDRGNMSAGDVITTFYAALSTFEGVQGLGPHILSLVRGMQASKALKSVVSDRVVE  |     |     |     |     |     |
| 48_10124 | FGIYQVDRGNMSAGDVITTFYAALSTFEGVQGLGPHILSLVRGMQASKALKSVVSDRVVE  |     |     |     |     |     |
| 49_7151  | FGIYQVDRGNMSAGDVITTFYAALSTFEGVQGLGPHILSLVRGMQASKALKSVVSDRVVE  |     |     |     |     |     |
| 50_3695  | FGIYQVDRGNMSAGDVITTFYAALSTFEGVQGLGPHILSLVRGMQASKALKSVVSDRVVE  |     |     |     |     |     |
| 51_364   | FGIYQVDRGNMSAGDVITTFYAALSTFEGVQGLGPHILSLVRGMQASKALKSVVSDRVVE  |     |     |     |     |     |
| 52_242   | FGIYQVDRGNMSAGDVITTFYAALSTFEGVQGLGPHILSLVRGMQASKALKSVVSDRVVE  |     |     |     |     |     |
| 53_5225  | FGIYQVDRGNMSAGDVITTFYAALSTFEGVQGLGPHILSLVRGMQASKALKSVVSDRVVE  |     |     |     |     |     |
| 54_1635  | FGIYQVDRGNMSAGDVITTFYAALSTFEGVQGLGPHILSLVRGMQASKALKSVVSDRVVE  |     |     |     |     |     |
| 55_5766  | FGIYQVDRGNMSAGDVITTFYAALSTFEGVQGLGPHILSLVRGMQASKALKSVVSDRVVE  |     |     |     |     |     |
| 56_1557  | FGIYQVDRGNMSAGDVITTFYAALSTFEGVQGLGPHILSLVRGMQASKALKSVVSDRVVE  |     |     |     |     |     |
| 57_10137 | FGIYQVDRGNMSAGDVITTFYAALSTFEGVQGLGPHILSLVRGMQASKALKSVVSDRVVE  |     |     |     |     |     |
| 58_10525 | FGIYQVDRGNMSAGDVITTFYAALSTFEGVQGLGPHILSLVRGMQASKALKSVVSDRVVE  |     |     |     |     |     |
| 59_3457  | FGIYQVDRGNMSAGDVITTFYAALSTFEGVQGLGPHILSLVRGMQASKALKSVVSDRVVE  |     |     |     |     |     |
| 60_8244  | FGIYQVDRGNMSAGDVITTFYAALSTFEGVQGLGPHILSLVRGMQASKALKSVVSDRVVE  |     |     |     |     |     |
| 61_7964  | FGIYQVDRGNMSAGDVITTFYAALSTFEGVQGLGPHILSLVRGMQASKALKSVVSDRVVE  |     |     |     |     |     |
| 62_4413  | FGIYQVDRGNMSAGDVITTFYAALSTFEGVQGLGPHILSLVRGMQASKALKSVVSDRVVE  |     |     |     |     |     |
| 63_6958  | FGIYQVDRGNMSAGDVITTFYAALSTFEGVQGLGPHILSLVRGMQASKALKSVVSDRVVE  |     |     |     |     |     |
| 64_5997  | ILKTVWPAALDTKHRLYAAVALFWCIVAAGCSPVFAFVFSNLLQAFWAQGSKLEAGTKWAI |     |     |     |     |     |
| 65_8711  | FGIYQVDRGNMSAGDVITTFYAALSTFEGVQGLGPHILSLVRGMQASKALKSVVSDRVVE  |     |     |     |     |     |
| 66_9925  | FGIYQVDRGNMSAGDVITTFYAALSTFEGVQGLGPHILSLVRGMQASKALKSVVSDRVVE  |     |     |     |     |     |
| 67_10374 | FGIYQVDRGNMSAGDVITTFYAALSTFEGVQGLGPHILSLVRGMQASKALKSVVSDRVVE  |     |     |     |     |     |
| 68_3713  | FGIYQVDRGNMSAGDVITTFYAALSTFEGVQGLGPHILSLVRGMQASKALKSVVSDRVVE  |     |     |     |     |     |
| 69_4511  | FGIYQVDRGNMSAGDVITTFYAALSTFEGVQGLGPHILSLVRGMQASKALKSVVSDRVVE  |     |     |     |     |     |
| 70_6201  | FGIYQVDRGNMSAGDVITTFYAALSTFEGVQGLGPHILSLVRGMQASKALKSVVSDRVVE  |     |     |     |     |     |
| 71_3261  | FGIYQVDRGNMSAGDVITTFYAALSTFEGVQGLGPHILSLVRGMQASKALKSVVSDRVVE  |     |     |     |     |     |
| 72_8516  | FGIYQVDRGNMSAGDVITTFYAALSTFEGVQGLGPHILSLVRGMQASKALKSVVSDRVVE  |     |     |     |     |     |
| 73_9295  | FGIYQVDRGNMSAGDVITTFYAALSTFEGVQGLGPHILSLVRGMQASKALKSVVSDRVVE  |     |     |     |     |     |
| 74_809   | FGIYQVDRGNMSAGDVITTFYAALSTFEGVQGLGPHILSLVRGMQASKALKSVVSDRVVE  |     |     |     |     |     |
| 75_7282  | FGIYQVDRGNMSAGDVITTFYAALSTFEGVQGLGPHILSLVRGMQASKALKSVVSDRVVE  |     |     |     |     |     |
| 76_4910  | FGIYQVDRGNMSAGDVITTFYAALSTFEGVQGLGPHILSLVRGMQASKALKSVVSDRVVE  |     |     |     |     |     |
| 77_10912 | FGIYQVDRGNMSAGDVITTFYAALSTFEGVQGLGPHILSLVRGMQASKALKSVVSDRVVE  |     |     |     |     |     |
| 78_4020  | FGIYQVDRGNMSAGDVITTFYAALSTFEGVQGLGPHILSLVRGMQASKALKSVVSDRVVE  |     |     |     |     |     |
| 79_6703  | FGIYQVDRGNMSAGDVITTFYAALSTFEGVQGLGPHILSLVRGMQASKALKSVVSDRVVE  |     |     |     |     |     |
| 80_8619  | FGIYQVDRGNMSAGDVITTFYAALSTFEGVQGLGPHILSLVRGMQASKALKSVVSDRVVE  |     |     |     |     |     |
| 81_4126  | FGIYQVDRGNMSAGDVITTFYAALSTFEGVQGLGPHILSLVRGMQASKALKSVVSDRVVE  |     |     |     |     |     |
| 82_1363  | FGIYQVDRGNMSAGDVITTFYAALSTFEGVQGLGPHILSLVRGMQASKALKSVVSDRVVE  |     |     |     |     |     |
| 83_5813  | FGIYQVDRGNMSAGDVITTFYAALSTFEGVQGLGPHILSLVRGMQASKALKSVVSDRVVE  |     |     |     |     |     |
| 84_2044  | FGIYQVDRGNMSAGDVITTFYAALSTFEGVQGLGPHILSLVRGMQASKALKSVVSDRVVE  |     |     |     |     |     |
| 85_7617  | FGIYQVDRGNMSAGDVITTFYAALSTFEGVQGLGPHILSLVRGMQASKALKSVVSDRVVE  |     |     |     |     |     |
| 86_1530  | FGIYQVDRGNMSAGDVITTFYAALSTFEGVQGLGPHILSLVRGMQASKALKSVVSDRVVE  |     |     |     |     |     |
| 87_1890  | FGIYQVDRGNMSAGDVITTFYAALSTFEGVQGLGPHILSLVRGMQASKALKSVVSDRVVE  |     |     |     |     |     |
| 88_7049  | FGIYQVDRGNMSAGDVITTFYAALSTFEGVQGLGPHILSLVRGMQASKALKSVVSDRVVE  |     |     |     |     |     |
| 89_440   | FGIYQVDRGNMSAGDVITTFYAALSTFEGVQGLGPHILSLVRGMQASKALKSVVSDRVVE  |     |     |     |     |     |
| 90_4331  | FGIYQVDRGNMSAGDVITTFYAALSTFEGVQGLGPHILSLVRGMQASKALKSVVSDRVVE  |     |     |     |     |     |

|          | 430         | 440        | 450    | 460        | 470            | 480                          |
|----------|-------------|------------|--------|------------|----------------|------------------------------|
| 1_1896   | MGGGRKPRVFE | GRIEVKSVSF | AYPSNP | AVQVLKPTS  | MTFKPGKMTF     | LVGRSGSGKSTITN               |
| 2_4785   | MGGGRKPRVFE | GRIEVKSVSF | AYPSNP | AVQVLKPTS  | MTFKPGKMTF     | LVGRSGSGKSTITN               |
| 3_3653   | MGGGRKPRVFE | GRIEVKSVSF | AYPSNP | AVQVLKPTS  | MTFKPGKMTF     | LVGRSGSGKSTITN               |
| 4_8157   | MGGGRKPRVFE | GRIEVKSVSF | AYPSNP | AVQVLKPTS  | MTFKPGKMTF     | LVGRSGSGKSTITN               |
| 5_752    | MGGGRKPRVFE | GRIEVKSVSF | AYPSNP | AVQVLKPTS  | MTFKPGKMTF     | LVGRSGSGKSTITN               |
| 6_8853   | MGGGRKPRVFE | GRIEVKSVSF | AYPSNP | AVQVLKPTS  | MTFKPGKMTF     | LVGRSGSGKSTITN               |
| 7_4015   | RALAESG     | ADSSSQD    | GAMTP  | DDDLSSLSSE | DEPDAD         | MSGKSFYIPEPKTTSSSLGALGRMS    |
| 8_2020   | MGGGRKPRVFE | GRIEVKSVSF | AYPSNP | AVQVLKPTS  | MTFKPGKMTF     | LVGRSGSGKSTITN               |
| 9_1829   | MGGGRKPRVFE | GRIEVKSVSF | AYPSNP | AVQVLKPTS  | MTFKPGKMTF     | LVGRSGSGKSTITN               |
| 10_6452  | MGGGRKPRVFE | GRIEVKSVSF | AYPSNP | AVQVLKPTS  | MTFKPGKMTF     | LVGRSGSGKSTITN               |
| 11_8627  | MGGGRKPRVFE | GRIEVKSVSF | AYPSNP | AVQVLKPTS  | MTFKPGKMTF     | LVGRSGSGKSTITN               |
| 12_6118  | MGGGRKPRVFE | GRIEVKSVSF | AYPSNP | AVQVLKPTS  | MTFKPGKMTF     | LVGRSGSGKSTITN               |
| 13_2688  | MGGGRKPRVFE | GRIEVKSVSF | AYPSNP | AVQVLKPTS  | MTFKPGKMTF     | LVGRSGSGKSTITN               |
| 14_6406  | MGGGRKPRVFE | GRIEVKSVSF | AYPSNP | AVQVLKPTS  | MTFKPGKMTF     | LVGRSGSGKSTITN               |
| 15_9419  | MGGGRKPRVFE | GRIEVKSVSF | AYPSNP | AVQVLKPTS  | MTFKPGKMTF     | LVGRSGSGKSTITN               |
| 16_8507  | MGGGRKPRVFE | GRIEVKSVSF | AYPSNP | AVQVLKPTS  | MTFKPGKMTF     | LVGRSGSGKSTITN               |
| 17_5884  | MGGGRKPRVFE | GRIEVKSVSF | AYPSNP | AVQVLKPTS  | MTFKPGKMTF     | LVGRSGSGKSTITN               |
| 18_2670  | MGGGRKPRVFE | GRIEVKSVSF | AYPSNP | AVQVLKPTS  | MTFKPGKMTF     | LVGRSGSGKSTITN               |
| 19_5172  | MGGGRKPRVFE | GRIEVKSVSF | AYPSNP | AVQVLKPTS  | MTFKPGKMTF     | LVGRSGSGKSTITN               |
| 20_8057  | MGGGRKPRVFE | GRIEVKSVSF | AYPSNP | AVQVLKPTS  | MTFKPGKMTF     | LVGRSGSGKSTITN               |
| 21_4920  | DEEATNTTG   | HMPAYQIL   | KTVW   | PALD       | TKHRLY         | AVAALFWCIVAAGCSPVFAFVSNLLQAF |
| 22_6393  | MGGGRKPRVFE | GRIEVKSVSF | AYPSNP | AVQVLKPTS  | MTFKPGKMTF     | LVGRSGSGKSTITN               |
| 23_8263  | MGGGRKPRVFE | GRIEVKSVSF | AYPSNP | AVQVLKPTS  | MTFKPGKMTF     | LVGRSGSGKSTITN               |
| 24_8248  | MGGGRKPRVFE | GRIEVKSVSF | AYPSNP | AVQVLKPTS  | MTFKPGKMTF     | LVGRSGSGKSTITN               |
| 25_6733  | MGGGRKPRVFE | GRIEVKSVSF | AYPSNP | AVQVLKPTS  | MTFKPGKMTF     | LVGRSGSGKSTITN               |
| 26_2277  | MGGGRKPRVFE | GRIEVKSVSF | AYPSNP | AVQVLKPTS  | MTFKPGKMTF     | LVGRSGSGKSTITN               |
| 27_2623  | MGGGRKPRVFE | GRIEVKSVSF | AYPSNP | AVQVLKPTS  | MTFKPGKMTF     | LVGRSGSGKSTITN               |
| 28_7413  | MGGGRKPRVFE | GRIEVKSVSF | AYPSNP | AVQVLKPTS  | MTFKPGKMTF     | LVGRSGSGKSTITN               |
| 29_8980  | MGGGRKPRVFE | GRIEVKSVSF | AYPSNP | AVQVLKPTS  | MTFKPGKMTF     | LVGRSGSGKSTITN               |
| 30_8706  | MGGGRKPRVFE | GRIEVKSVSF | AYPSNP | AVQVLKPTS  | MTFKPGKMTF     | LVGRSGSGKSTITN               |
| 31_6378  | MGGGRKPRVFE | GRIEVKSVSF | AYPSNP | AVQVLKPTS  | MTFKPGKMTF     | LVGRSGSGKSTITN               |
| 32_4679  | MGGGRKPRVFE | GRIEVKSVSF | AYPSNP | AVQVLKPTS  | MTFKPGKMTF     | LVGRSGSGKSTITN               |
| 33_2437  | MGGGRKPRVFE | GRIEVKSVSF | AYPSNP | AVQVLKPTS  | MTFKPGKMTF     | LVGRSGSGKSTITN               |
| 34_9700  | MGGGRKPRVFE | GRIEVKSVSF | AYPSNP | AVQVLKPTS  | MTFKPGKMTF     | LVGRSGSGKSTITN               |
| 35_10218 | MGGGRKPRVFE | GRIEVKSVSF | AYPSNP | AVQVLKPTS  | MTFKPGKMTF     | LVGRSGSGKSTITN               |
| 36_2652  | MGGGRKPRVFE | GRIEVKSVSF | AYPSNP | AVQVLKPTS  | MTFKPGKMTF     | LVGRSGSGKSTITN               |
| 37_5779  | MGGGRKPRVFE | GRIEVKSVSF | AYPSNP | AVQVLKPTS  | MTFKPGKMTF     | LVGRSGSGKSTITN               |
| 38_654   | MGGGRKPRVFE | GRIEVKSVSF | AYPSNP | AVQVLKPTS  | MTFKPGKMTF     | LVGRSGSGKSTITN               |
| 39_4879  | MGGGRKPRVFE | GRIEVKSVSF | AYPSNP | AVQVLKPTS  | MTFKPGKMTF     | LVGRSGSGKSTITN               |
| 40_8113  | MGGGRKPRVFE | GRIEVKSVSF | AYPSNP | AVQVLKPTS  | MTFKPGKMTF     | LVGRSGSGKSTITN               |
| 41_1767  | MGGGRKPRVFE | GRIEVKSVL  | KPTSM  | TFKPGKMTF  | LVGRSGSGKSTITN | LLVKFYEP                     |
| 42_8428  | MGGGRKPRVFE | GRIEVKSVSF | AYPSNP | AVQVLKPTS  | MTFKPGKMTF     | LVGRSGSGKSTITN               |
| 43_9819  | MGGGRKPRVFE | GRIEVKSVSF | AYPSNP | AVQVLKPTS  | MTFKPGKMTF     | LVGRSGSGKSTITN               |
| 44_5569  | MGGGRKPRVFE | GRIEVKSVSF | AYPSNP | AVQVLKPTS  | MTFKPGKMTF     | LVGRSGSGKSTITN               |
| 45_4189  | MGGGRKPRVFE | GRIEVKSVSF | AYPSNP | AVQVLKPTS  | MTFKPGKMTF     | LVGRSGSGKSTITN               |
| 46_1027  | MGGGRKPRVFE | GRIEVKSVSF | AYPSNP | AVQVLKPTS  | MTFKPGKMTF     | LVGRSGSGKSTITN               |
| 47_5048  | MGGGRKPRVFE | GRIEVKSVSF | AYPSNP | AVQVLKPTS  | MTFKPGKMTF     | LVGRSGSGKSTITN               |
| 48_10124 | MGGGRKPRVFE | GRIEVKSVSF | AYPSNP | AVQVLKPTS  | MTFKPGKMTF     | LVGRSGSGKSTITN               |
| 49_7151  | MGGGRKPRVFE | GRIEVKSVSF | AYPSNP | AVQVLKPTS  | MTFKPGKMTF     | LVGRSGSGKSTITN               |
| 50_3695  | MGGGRKPRVFE | GRIEVKSVSF | AYPSNP | AVQVLKPTS  | MTFKPGKMTF     | LVGRSGSGKSTITN               |
| 51_364   | MGGGRKPRVFE | GRIEVKSVSF | AYPSNP | AVQVLKPTS  | MTFKPGKMTF     | LVGRSGSGKSTITN               |
| 52_242   | MGGGRKPRVFE | GRIEVKSVSF | AYPSNP | AVQVLKPTS  | MTFKPGKMTF     | LVGRSGSGKSTITN               |
| 53_5225  | MGGGRKPRVFE | GRIEVKSVSF | AYPSNP | AVQVLKPTS  | MTFKPGKMTF     | LVGRSGSGKSTITN               |
| 54_1635  | MGGGRKPRVFE | GRIEVKSVSF | AYPSNP | AVQVLKPTS  | MTFKPGKMTF     | LVGRSGSGKSTITN               |
| 55_5766  | MGGGRKPRVFE | GRIEVKSVSF | AYPSNP | AVQVLKPTS  | MTFKPGKMTF     | LVGRSGSGKSTITN               |
| 56_1557  | MGGGRKPRVFE | GRIEVKSVSF | AYPSNP | AVQVLKPTS  | MTFKPGKMTF     | LVGRSGSGKSTITN               |
| 57_10137 | MGGGRKPRVFE | GRIEVKSVSF | AYPSNP | AVQVLKPTS  | MTFKPGKMTF     | LVGRSGSGKSTITN               |
| 58_10525 | MGGGRKPRVFE | GRIEVKSVSF | AYPSNP | AVQVLKPTS  | MTFKPGKMTF     | LVGRSGSGKSTITN               |
| 59_3457  | MGGGRKPRVFE | GRIEVKSVSF | AYPSNP | AVQVLKPTS  | MTFKPGKMTF     | LVGRSGSGKSTITN               |
| 60_8244  | MGGGRKPRVFE | GRIEVKSVSF | AYPSNP | AVQVLKPTS  | MTFKPGKMTF     | LVGRSGSGKSTITN               |
| 61_7964  | MGGGRKPRVFE | GRIEVKSVSF | AYPSNP | AVQVLKPTS  | MTFKPGKMTF     | LVGRSGSGKSTITN               |
| 62_4413  | MGGGRKPRVFE | GRIEVKSVSF | AYPSNP | AVQVLKPTS  | MTFKPGKMTF     | LVGRSGSGKSTITN               |
| 63_6958  | MGGGRKPRVFE | GRIEVKSVSF | AYPSNP | AVQVLKPTS  | MTFKPGKMTF     | LVGRSGSGKSTITN               |
| 64_5997  | VLGCVGILD   | TAVF       | FTFLAG | AVAEWVD    | TLKVD          | AFSILCQPRAWHDRSKNSAARVCDV    |
| 65_8711  | MGGGRKPRVFE | GRIEVKSVSF | AYPSNP | AVQVLKPTS  | MTFKPGKMTF     | LVGRSGSGKSTITN               |
| 66_9925  | MGGGRKPRVFE | GRIEVKSVSF | AYPSNP | AVQVLKPTS  | MTFKPGKMTF     | LVGRSGSGKSTITN               |
| 67_10374 | MGGGRKPRVFE | GRIEVKSVSF | AYPSNP | AVQVLKPTS  | MTFKPGKMTF     | LVGRSGSGKSTITN               |
| 68_3713  | MGGGRKPRVFE | GRIEVKSVSF | AYPSNP | AVQVLKPTS  | MTFKPGKMTF     | LVGRSGSGKSTITN               |
| 69_4511  | MGGGRKPRVFE | GRIEVKSVSF | AYPSNP | AVQVLKPTS  | MTFKPGKMTF     | LVGRSGSGKSTITN               |
| 70_6201  | MGGGRKPRVFE | GRIEVKSVSF | AYPSNP | AVQVLKPTS  | MTFKPGKMTF     | LVGRSGSGKSTITN               |
| 71_3261  | MGGGRKPRVFE | GRIEVKSVSF | AYPSNP | AVQVLKPTS  | MTFKPGKMTF     | LVGRSGSGKSTITN               |
| 72_8516  | MGGGRKPRVFE | GRIEVKSVSF | AYPSNP | AVQVLKPTS  | MTFKPGKMTF     | LVGRSGSGKSTITN               |
| 73_9295  | MGGGRKPRVFE | GRIEVKSVSF | AYPSNP | AVQVLKPTS  | MTFKPGKMTF     | LVGRSGSGKSTITN               |
| 74_809   | MGGGRKPRVFE | GRIEVKSVSF | AYPSNP | AVQVLKPTS  | MTFKPGKMTF     | LVGRSGSGKSTITN               |
| 75_7282  | MGGGRKPRVFE | GRIEVKSVSF | AYPSNP | AVQVLKPTS  | MTFKPGKMTF     | LVGRSGSGKSTITN               |
| 76_4910  | MGGGRKPRVFE | GRIEVKSVSF | AYPSNP | AVQVLKPTS  | MTFKPGKMTF     | LVGRSGSGKSTITN               |
| 77_10912 | MGGGRKPRVFE | GRIEVKSVSF | AYPSNP | AVQVLKPTS  | MTFKPGKMTF     | LVGRSGSGKSTITN               |
| 78_4020  | MGGGRKPRVFE | GRIEVKSVSF | AYPSNP | AVQVLKPTS  | MTFKPGKMTF     | LVGRSGSGKSTITN               |
| 79_6703  | MGGGRKPRVFE | GRIEVKSVSF | AYPSNP | AVQVLKPTS  | MTFKPGKMTF     | LVGRSGSGKSTITN               |
| 80_8619  | MGGGRKPRVFE | GRIEVKSVSF | AYPSNP | AVQVLKPTS  | MTFKPGKMTF     | LVGRSGSGKSTITN               |
| 81_4126  | MGGGRKPRVFE | GRIEVKSVL  | KPTSM  | TFKPGKMTF  | LVGRSGSGKSTITN | LLVKFYEP                     |
| 82_1363  | MGGGRKPRVFE | GRIEVKSVSF | AYPSNP | AVQVLKPTS  | MTFKPGKMTF     | LVGRSGSGKSTITN               |
| 83_5813  | MGGGRKPRVFE | GRIEVKSVSF | AYPSNP | AVQVLKPTS  | MTFKPGKMTF     | LVGRSGSGKSTITN               |
| 84_2044  | MGGGRKPRVFE | GRIEVKSVSF | AYPSNP | AVQVLKPTS  | MTFKPGKMTF     | LVGRSGSGKSTITN               |
| 85_7617  | MGGGRKPRVFE | GRIEVKSVSF | AYPSNP | AVQVLKPTS  | MTFKPGKMTF     | LVGRSGSGKSTITN               |
| 86_1530  | MGGGRKPRVFE | GRIEVKSVSF | AYPSNP | AVQVLKPTS  | MTFKPGKMTF     | LVGRSGSGKSTITN               |
| 87_1890  | MGGGRKPRVFE | GRIEVKSVSF | AYPSNP | AVQVLKPTS  | MTFKPGKMTF     | LVGRSGSGKSTITN               |
| 88_7049  | MGGGRKPRVFE | GRIEVKSVSF | AYPSNP | AVQVLKPTS  | MTFKPGKMTF     | LVGRSGSGKSTITN               |
| 89_440   | MGGGRKPRVFE | GRIEVKSVSF | AYPSNP | AVQVLKPTS  | MTFKPGKMTF     | LVGRSGSGKSTITN               |
| 90_4331  | MGGGRKPRVFE | GRIEVKSVSF | AYPSNP | AVQVLKPTS  | MTFKPGKMTF     | LVGRSGSGKSTITN               |



|          | 490      | 500     | 510    | 520    | 530      | 540          |
|----------|----------|---------|--------|--------|----------|--------------|
| 1_1896   | LLVKFYEP | LSGEILL | DEHPLQ | TLNSEW | VRKNVT   | LVQQQSTLFS   |
| 2_4785   | LLVKFYEP | LSGEILL | DEHPLQ | TLNSEW | VRKNVT   | LVQQQSTLFS   |
| 3_3653   | LLVKFYEP | LSGEILL | DEHPLQ | TLNSEW | VRKNVT   | LVQQQSTLFS   |
| 4_8157   | LLVKFYEP | LSGEILL | DEHPLQ | TLNSEW | VRKNVT   | LVQQQSTLFS   |
| 5_752    | LLVKFYEP | LSGEILL | DEHPLQ | TLNSEW | VRKNVT   | LVQQQSTLFS   |
| 6_8853   | LLVKFYEP | LSGEILL | DEHPLQ | TLNSEW | VRKNVT   | LVQQQSTLFS   |
| 7_4015   | FVPIPG   | TNAAIY  | PTPNQ  | PGSDAY | LQLHQSP  | RHRHREQVRPNY |
| 8_2020   | LLVKFYEP | LSGEILL | DEHPLQ | TLNSEW | VRKNVT   | LVQQQSTLFS   |
| 9_1829   | LLVKFYEP | LSGEILL | DEHPLQ | TLNSEW | VRKNVT   | LVQQQSTLFS   |
| 10_6452  | LLVKFYEP | LSGEILL | DEHPLQ | TLNSEW | VRKNVT   | LVQQQSTLFS   |
| 11_8627  | LLVKFYEP | LSGEILL | DEHPLQ | TLNSEW | VRKNVT   | LVQQQSTLFS   |
| 12_6118  | LLVKFYEP | LSGEILL | DEHPLQ | TLNSEW | VRKNVT   | LVQQQSTLFS   |
| 13_2688  | LLVKFYEP | LSGEILL | DEHPLQ | TLNSEW | VRKNVT   | LVQQQSTLFS   |
| 14_6406  | LLVKFYEP | LSGEILL | DEHPLQ | TLNSEW | VRKNVT   | LVQQQSTLFS   |
| 15_9419  | LLVKFYEP | LSGEILL | DEHPLQ | TLNSEW | VRKNVT   | LVQQQSTLFS   |
| 16_8507  | LLVKFYEP | LSGEILL | DEHPLQ | TLNSEW | VRKNVT   | LVQQQSTLFS   |
| 17_5884  | LLVKFYEP | LSGEILL | DEHPLQ | TLNSEW | VRKNVT   | LVQQQSTLFS   |
| 18_2670  | LLVKFYEP | LSGEILL | DEHPLQ | TLNSEW | VRKNVT   | LVQQQSTLFS   |
| 19_5172  | LLVKFYEP | LSGEILL | DEHPLQ | TLNSEW | VRKNVT   | LVQQQSTLFS   |
| 20_8057  | LLVKFYEP | LSGEILL | DEHPLQ | TLNSEW | VRKNVT   | LVQQQSTLFS   |
| 21_4920  | WAQGS    | KLEAG   | TKWAI  | VLGCV  | GILDFT   | AVFFTFFLAG   |
| 22_6393  | LLVKFYEP | LSGEILL | DEHPLQ | TLNSEW | VRKNVT   | LVQQQSTLFS   |
| 23_8263  | LLVKFYEP | LSGEILL | DEHPLQ | TLNSEW | VRKNVT   | LVQQQSTLFS   |
| 24_8248  | LLVKFYEP | LSGEILL | DEHPLQ | TLNSEW | VRKNVT   | LVQQQSTLFS   |
| 25_6733  | LLVKFYEP | LSGEILL | DEHPLQ | TLNSEW | VRKNVT   | LVQQQSTLFS   |
| 26_2277  | LLVKFYEP | LSGEILL | DEHPLQ | TLNSEW | VRKNVT   | LVQQQSTLFS   |
| 27_2623  | LLVKFYEP | LSGEILL | DEHPLQ | TLNSEW | VRKNVT   | LVQQQSTLFS   |
| 28_7413  | LLVKFYEP | LSGEILL | DEHPLQ | TLNSEW | VRKNVT   | LVQQQSTLFS   |
| 29_8980  | LLVKFYEP | LSGEILL | DEHPLQ | TLNSEW | VRKNVT   | LVQQQSTLFS   |
| 30_8706  | LLVKFYEP | LSGEILL | DEHPLQ | TLNSEW | VRKNVT   | LVQQQSTLFS   |
| 31_6378  | LLVKFYEP | LSGEILL | DEHPLQ | TLNSEW | VRKNVT   | LVQQQSTLFS   |
| 32_4679  | LLVKFYEP | LSGEILL | DEHPLQ | TLNSEW | VRKNVT   | LVQQQSTLFS   |
| 33_2437  | LLVKFYEP | LSGEILL | DEHPLQ | TLNSEW | VRKNVT   | LVQQQSTLFS   |
| 34_9700  | LLVKFYEP | LSGEILL | DEHPLQ | TLNSEW | VRKNVT   | LVQQQSTLFS   |
| 35_10218 | LLVKFYEP | LSGEILL | DEHPLQ | TLNSEW | VRKNVT   | LVQQQSTLFS   |
| 36_2652  | LLVKFYEP | LSGEILL | DEHPLQ | TLNSEW | VRKNVT   | LVQQQSTLFS   |
| 37_5779  | LLVKFYEP | LSGEILL | DEHPLQ | TLNSEW | VRKNVT   | LVQQQSTLFS   |
| 38_654   | LLVKFYEP | LSGEILL | DEHPLQ | TLNSEW | VRKNVT   | LVQQQSTLFS   |
| 39_4879  | LLVKFYEP | LSGEILL | DEHPLQ | TLNSEW | VRKNVT   | LVQQQSTLFS   |
| 40_8113  | LLVKFYEP | LSGEILL | DEHPLQ | TLNSEW | VRKNVT   | LVQQQSTLFS   |
| 41_1767  | ILLDEH   | PLQTL   | NSEW   | VRKNVT | LVQQQSTL | FSDTLYANI    |
| 42_8428  | LLVKFYEP | LSGEILL | DEHPLQ | TLNSEW | VRKNVT   | LVQQQSTLFS   |
| 43_9819  | LLVKFYEP | LSGEILL | DEHPLQ | TLNSEW | VRKNVT   | LVQQQSTLFS   |
| 44_5569  | LLVKFYEP | LSGEILL | DEHPLQ | TLNSEW | VRKNVT   | LVQQQSTLFS   |
| 45_4189  | LLVKFYEP | LSGEILL | DEHPLQ | TLNSEW | VRKNVT   | LVQQQSTLFS   |
| 46_1027  | LLVKFYEP | LSGEILL | DEHPLQ | TLNSEW | VRKNVT   | LVQQQSTLFS   |
| 47_5048  | LLVKFYEP | LSGEILL | DEHPLQ | TLNSEW | VRKNVT   | LVQQQSTLFS   |
| 48_10124 | LLVKFYEP | LSGEILL | DEHPLQ | TLNSEW | VRKNVT   | LVQQQSTLFS   |
| 49_7151  | LLVKFYEP | LSGEILL | DEHPLQ | TLNSEW | VRKNVT   | LVQQQSTLFS   |
| 50_3695  | LLVKFYEP | LSGEILL | DEHPLQ | TLNSEW | VRKNVT   | LVQQQSTLFS   |
| 51_364   | LLVKFYEP | LSGEILL | DEHPLQ | TLNSEW | VRKNVT   | LVQQQSTLFS   |
| 52_242   | LLVKFYEP | LSGEILL | DEHPLQ | TLNSEW | VRKNVT   | LVQQQSTLFS   |
| 53_5225  | LLVKFYEP | LSGEILL | DEHPLQ | TLNSEW | VRKNVT   | LVQQQSTLFS   |
| 54_1635  | LLVKFYEP | LSGEILL | DEHPLQ | TLNSEW | VRKNVT   | LVQQQSTLFS   |
| 55_5766  | LLVKFYEP | LSGEILL | DEHPLQ | TLNSEW | VRKNVT   | LVQQQSTLFS   |
| 56_1557  | LLVKFYEP | LSGEILL | DEHPLQ | TLNSEW | VRKNVT   | LVQQQSTLFS   |
| 57_10137 | LLVKFYEP | LSGEILL | DEHPLQ | TLNSEW | VRKNVT   | LVQQQSTLFS   |
| 58_10525 | LLVKFYEP | LSGEILL | DEHPLQ | TLNSEW | VRKNVT   | LVQQQSTLFS   |
| 59_3457  | LLVKFYEP | LSGEILL | DEHPLQ | TLNSEW | VRKNVT   | LVQQQSTLFS   |
| 60_8244  | LLVKFYEP | LSGEILL | DEHPLQ | TLNSEW | VRKNVT   | LVQQQSTLFS   |
| 61_7964  | LLVKFYEP | LSGEILL | DEHPLQ | TLNSEW | VRKNVT   | LVQQQSTLFS   |
| 62_4413  | LLVKFYEP | LSGEILL | DEHPLQ | TLNSEW | VRKNVT   | LVQQQSTLFS   |
| 63_6958  | LLVKFYEP | LSGEILL | DEHPLQ | TLNSEW | VRKNVT   | LVQQQSTLFS   |
| 64_5997  | LDRGA    | DEMRT   | IVAQ   | FTPIA  | LIVVIM   | VSSAIVWAM    |
| 65_8711  | LLVKFYEP | LSGEILL | DEHPLQ | TLNSEW | VRKNVT   | LVQQQSTLFS   |
| 66_9925  | LLVKFYEP | LSGEILL | DEHPLQ | TLNSEW | VRKNVT   | LVQQQSTLFS   |
| 67_10374 | LLVKFYEP | LSGEILL | DEHPLQ | TLNSEW | VRKNVT   | LVQQQSTLFS   |
| 68_3713  | LLVKFYEP | LSGEILL | DEHPLQ | TLNSEW | VRKNVT   | LVQQQSTLFS   |
| 69_4511  | LLVKFYEP | LSGEILL | DEHPLQ | TLNSEW | VRKNVT   | LVQQQSTLFS   |
| 70_6201  | LLVKFYEP | LSGEILL | DEHPLQ | TLNSEW | VRKNVT   | LVQQQSTLFS   |
| 71_3261  | LLVKFYEP | LSGEILL | DEHPLQ | TLNSEW | VRKNVT   | LVQQQSTLFS   |
| 72_8516  | LLVKFYEP | LSGEILL | DEHPLQ | TLNSEW | VRKNVT   | LVQQQSTLFS   |
| 73_9295  | LLVKFYEP | LSGEILL | DEHPLQ | TLNSEW | VRKNVT   | LVQQQSTLFS   |
| 74_809   | LLVKFYEP | LSGEILL | DEHPLQ | TLNSEW | VRKNVT   | LVQQQSTLFS   |
| 75_7282  | LLVKFYEP | LSGEILL | DEHPLQ | TLNSEW | VRKNVT   | LVQQQSTLFS   |
| 76_4910  | LLVKFYEP | LSGEILL | DEHPLQ | TLNSEW | VRKNVT   | LVQQQSTLFS   |
| 77_10912 | LLVKFYEP | LSGEILL | DEHPLQ | TLNSEW | VRKNVT   | LVQQQSTLFS   |
| 78_4020  | LLVKFYEP | LSGEILL | DEHPLQ | TLNSEW | VRKNVT   | LVQQQSTLFS   |
| 79_6703  | LLVKFYEP | LSGEILL | DEHPLQ | TLNSEW | VRKNVT   | LVQQQSTLFS   |
| 80_8619  | LLVKFYEP | LSGEILL | DEHPLQ | TLNSEW | VRKNVT   | LVQQQSTLFS   |
| 81_4126  | ILLDEH   | PLQTL   | NSEW   | VRKNVT | LVQQQSTL | FSDTLYANI    |
| 82_1363  | LLVKFYEP | LSGEILL | DEHPLQ | TLNSEW | VRKNVT   | LVQQQSTLFS   |
| 83_5813  | LLVKFYEP | LSGEILL | DEHPLQ | TLNSEW | VRKNVT   | LVQQQSTLFS   |
| 84_2044  | LLVKFYEP | LSGEILL | DEHPLQ | TLNSEW | VRKNVT   | LVQQQSTLFS   |
| 85_7617  | LLVKFYEP | LSGEILL | DEHPLQ | TLNSEW | VRKNVT   | LVQQQSTLFS   |
| 86_1530  | LLVKFYEP | LSGEILL | DEHPLQ | TLNSEW | VRKNVT   | LVQQQSTLFS   |
| 87_1890  | LLVKFYEP | LSGEILL | DEHPLQ | TLNSEW | VRKNVT   | LVQQQSTLFS   |
| 88_7049  | LLVKFYEP | LSGEILL | DEHPLQ | TLNSEW | VRKNVT   | LVQQQSTLFS   |
| 89_440   | LLVKFYEP | LSGEILL | DEHPLQ | TLNSEW | VRKNVT   | LVQQQSTLFS   |
| 90_4331  | LLVKFYEP | LSGEILL | DEHPLQ | TLNSEW | VRKNVT   | LVQQQSTLFS   |

|          | 550              | 560           | 570         | 580           | 590           | 600          |
|----------|------------------|---------------|-------------|---------------|---------------|--------------|
| 1_1896   | KVKAACEMALLQSTI  | IAGLPQGLD     | TLVGP       | GGQSLSGGQ     | RQRVALARARLRD | TPVILDEVT    |
| 2_4785   | KVKAACEMALLQSTI  | IAGLPQGLD     | TLVGP       | GGQSLSGGQ     | RQRVALARARLRD | TPVILDEVT    |
| 3_3653   | KVKAACEMALLQSTI  | IAGLPQGLD     | TLVGP       | GGQSLSGGQ     | RQRVALARARLRD | TPVILDEVT    |
| 4_8157   | KVKAACEMALLQSTI  | IAGLPQGLD     | TLVGP       | GGQSLSGGQ     | RQRVALARARLRD | TPVILDEVT    |
| 5_752    | KVKAACEMALLQSTI  | IAGLPQGLD     | TLVGP       | GGQSLSGGQ     | RQRVALARARLRD | TPVILDEVT    |
| 6_8853   | KVKAACEMALLQSTI  | IAGLPQGLD     | TLVGP       | GGQSLSGGQ     | RQRVALARARLRD | TPVILDEVT    |
| 7_4015   | ARGLSALANRSPAKRS | VPPQSGIGDVLRL | STRSSPIED   | VEMSPVRENKK   | GKGVKGVMRKKM  |              |
| 8_2020   | KVKAACEMALLQSTI  | IAGLPQGLD     | TLVGP       | GGQSLSGGQ     | RQRVALARARLRD | TPVILDEVT    |
| 9_1829   | KVKAACEMALLQSTI  | IAGLPQGLD     | TLVGP       | GGQSLSGGQ     | RQRVALARARLRD | TPVILDEVT    |
| 10_6452  | KVKAACEMALLQSTI  | IAGLPQGLD     | TLVGP       | GGQSLSGGQ     | RQRVALARARLRD | TPVILDEVT    |
| 11_8627  | KVKAACEMALLQSTI  | IAGLPQGLD     | TLVGP       | GGQSLSGGQ     | RQRVALARARLRD | TPVILDEVT    |
| 12_6118  | KVKAACEMALLQSTI  | IAGLPQGLD     | TLVGP       | GGQSLSGGQ     | RQRVALARARLRD | TPVILDEVT    |
| 13_2688  | KVKAACEMALLQSTI  | IAGLPQGLD     | TLVGP       | GGQSLSGGQ     | RQRVALARARLRD | TPVILDEVT    |
| 14_6406  | KVKAACEMALLQSTI  | IAGLPQGLD     | TLVGP       | GGQSLSGGQ     | RQRVALARARLRD | TPVILDEVT    |
| 15_9419  | KVKAACEMALLQSTI  | IAGLPQGLD     | TLVGP       | GGQSLSGGQ     | RQRVALARARLRD | TPVILDEVT    |
| 16_8507  | KVKAACEMALLQSTI  | IAGLPQGLD     | TLVGP       | GGQSLSGGQ     | RQRVALARARLRD | TPVILDEVT    |
| 17_5884  | KVKAACEMALLQSTI  | IAGLPQGLD     | TLVGP       | GGQSLSGGQ     | RQRVALARARLRD | TPVILDEVT    |
| 18_2670  | KVKAACEMALLQSTI  | IAGLPQGLD     | TLVGP       | GGQSLSGGQ     | RQRVALARARLRD | TPVILDEVT    |
| 19_5172  | KVKAACEMALLQSTI  | IAGLPQGLD     | TLVGP       | GGQSLSGGQ     | RQRVALARARLRD | TPVILDEVT    |
| 20_8057  | KVKAACEMALLQSTI  | IAGLPQGLD     | TLVGP       | GGQSLSGGQ     | RQRVALARARLRD | TPVILDEVT    |
| 21_4920  | WHDRSKNSAARVCD   | VLDRGADEMRTI  | VAGFTPI     | ALIVVIMVSSAI  | VWAMVILWQL    | TLVAL        |
| 22_6393  | KVKAACEMALLQSTI  | IAGLPQGLD     | TLVGP       | GGQSLSGGQ     | RQRVALARARLRD | TPVILDEVT    |
| 23_8263  | KVKAACEMALLQSTI  | IAGLPQGLD     | TLVGP       | GGQSLSGGQ     | RQRVALARARLRD | TPVILDEVT    |
| 24_8248  | KVKAACEMALLQSTI  | IAGLPQGLD     | TLVGP       | GGQSLSGGQ     | RQRVALARARLRD | TPVILDEVT    |
| 25_6733  | KVKAACEMALLQSTI  | IAGLPQGLD     | TLVGP       | GGQSLSGGQ     | RQRVALARARLRD | TPVILDEVT    |
| 26_2277  | KVKAACEMALLQSTI  | IAGLPQGLD     | TLVGP       | GGQSLSGGQ     | RQRVALARARLRD | TPVILDEVT    |
| 27_2623  | KVKAACEMALLQSTI  | IAGLPQGLD     | TLVGP       | GGQSLSGGQ     | RQRVALARARLRD | TPVILDEVT    |
| 28_7413  | KVKAACEMALLQSTI  | IAGLPQGLD     | TLVGP       | GGQSLSGGQ     | RQRVALARARLRD | TPVILDEVT    |
| 29_8980  | KVKAACEMALLQSTI  | IAGLPQGLD     | TLVGP       | GGQSLSGGQ     | RQRVALARARLRD | TPVILDEVT    |
| 30_8706  | KVKAACEMALLQSTI  | IAGLPQGLD     | TLVGP       | GGQSLSGGQ     | RQRVALARARLRD | TPVILDEVT    |
| 31_6378  | KVKAACEMALLQSTI  | IAGLPQGLD     | TLVGP       | GGQSLSGGQ     | RQRVALARARLRD | TPVILDEVT    |
| 32_4679  | KVKAACEMALLQSTI  | IAGLPQGLD     | TLVGP       | GGQSLSGGQ     | RQRVALARARLRD | TPVILDEVT    |
| 33_2437  | KVKAACEMALLQSTI  | IAGLPQGLD     | TLVGP       | GGQSLSGGQ     | RQRVALARARLRD | TPVILDEVT    |
| 34_9700  | KVKAACEMALLQSTI  | IAGLPQGLD     | TLVGP       | GGQSLSGGQ     | RQRVALARARLRD | TPVILDEVT    |
| 35_10218 | KVKAACEMALLQSTI  | IAGLPQGLD     | TLVGP       | GGQSLSGGQ     | RQRVALARARLRD | TPVILDEVT    |
| 36_2652  | KVKAACEMALLQSTI  | IAGLPQGLD     | TLVGP       | GGQSLSGGQ     | RQRVALARARLRD | TPVILDEVT    |
| 37_5779  | KVKAACEMALLQSTI  | IAGLPQGLD     | TLVGP       | GGQSLSGGQ     | RQRVALARARLRD | TPVILDEVT    |
| 38_654   | KVKAACEMALLQSTI  | IAGLPQGLD     | TLVGP       | GGQSLSGGQ     | RQRVALARARLRD | TPVILDEVT    |
| 39_4879  | KVKAACEMALLQSTI  | IAGLPQGLD     | TLVGP       | GGQSLSGGQ     | RQRVALARARLRD | TPVILDEVT    |
| 40_8113  | KVKAACEMALLQSTI  | IAGLPQGLD     | TLVGP       | GGQSLSGGQ     | RQRVALARARLRD | TPVILDEVT    |
| 41_1767  | STIAGLPQGLD      | TLVGP         | GGQSLSGGQ   | RQRVALARARLRD | TPVILDEVT     | SGLDPKSKLMIM |
| 42_8428  | KVKAACEMALLQSTI  | IAGLPQGLD     | TLVGP       | GGQSLSGGQ     | RQRVALARARLRD | TPVILDEVT    |
| 43_9819  | KVKAACEMALLQSTI  | IAGLPQGLD     | TLVGP       | GGQSLSGGQ     | RQRVALARARLRD | TPVILDEVT    |
| 44_5569  | KVKAACEMALLQSTI  | IAGLPQGLD     | TLVGP       | GGQSLSGGQ     | RQRVALARARLRD | TPVILDEVT    |
| 45_4189  | KVKAACEMALLQSTI  | IAGLPQGLD     | TLVGP       | GGQSLSGGQ     | RQRVALARARLRD | TPVILDEVT    |
| 46_1027  | KVKAACEMALLQSTI  | IAGLPQGLD     | TLVGP       | GGQSLSGGQ     | RQRVALARARLRD | TPVILDEVT    |
| 47_5048  | KVKAACEMALLQSTI  | IAGLPQGLD     | TLVGP       | GGQSLSGGQ     | RQRVALARARLRD | TPVILDEVT    |
| 48_10124 | KVKAACEMALLQSTI  | IAGLPQGLD     | TLVGP       | GGQSLSGGQ     | RQRVALARARLRD | TPVILDEVT    |
| 49_7151  | KVKAACEMALLQSTI  | IAGLPQGLD     | TLVGP       | GGQSLSGGQ     | RQRVALARARLRD | TPVILDEVT    |
| 50_3695  | KVKAACEMALLQSTI  | IAGLPQGLD     | TLVGP       | GGQSLSGGQ     | RQRVALARARLRD | TPVILDEVT    |
| 51_364   | KVKAACEMALLQSTI  | IAGLPQGLD     | TLVGP       | GGQSLSGGQ     | RQRVALARARLRD | TPVILDEVT    |
| 52_242   | KVKAACEMALLQSTI  | IAGLPQGLD     | TLVGP       | GGQSLSGGQ     | RQRVALARARLRD | TPVILDEVT    |
| 53_5225  | KVKAACEMALLQSTI  | IAGLPQGLD     | TLVGP       | GGQSLSGGQ     | RQRVALARARLRD | TPVILDEVT    |
| 54_1635  | KVKAACEMALLQSTI  | IAGLPQGLD     | TLVGP       | GGQSLSGGQ     | RQRVALARARLRD | TPVILDEVT    |
| 55_5766  | KVKAACEMALLQSTI  | IAGLPQGLD     | TLVGP       | GGQSLSGGQ     | RQRVALARARLRD | TPVILDEVT    |
| 56_1557  | KVKAACEMALLQSTI  | IAGLPQGLD     | TLVGP       | GGQSLSGGQ     | RQRVALARARLRD | TPVILDEVT    |
| 57_10137 | KVKAACEMALLQSTI  | IAGLPQGLD     | TLVGP       | GGQSLSGGQ     | RQRVALARARLRD | TPVILDEVT    |
| 58_10525 | KVKAACEMALLQSTI  | IAGLPQGLD     | TLVGP       | GGQSLSGGQ     | RQRVALARARLRD | TPVILDEVT    |
| 59_3457  | KVKAACEMALLQSTI  | IAGLPQGLD     | TLVGP       | GGQSLSGGQ     | RQRVALARARLRD | TPVILDEVT    |
| 60_8244  | KVKAACEMALLQSTI  | IAGLPQGLD     | TLVGP       | GGQSLSGGQ     | RQRVALARARLRD | TPVILDEVT    |
| 61_7964  | KVKAACEMALLQSTI  | IAGLPQGLD     | TLVGP       | GGQSLSGGQ     | RQRVALARARLRD | TPVILDEVT    |
| 62_4413  | KVKAACEMALLQSTI  | IAGLPQGLD     | TLVGP       | GGQSLSGGQ     | RQRVALARARLRD | TPVILDEVT    |
| 63_6958  | KVKAACEMALLQSTI  | IAGLPQGLD     | TLVGP       | GGQSLSGGQ     | RQRVALARARLRD | TPVILDEVT    |
| 64_5997  | TSEKWEALSNESEAT  | TGILSSVVSDIR  | VVRAFLLEKFF | GDRFEAAAERAFT | IGKKRG        | LY           |
| 65_8711  | KVKAACEMALLQSTI  | IAGLPQGLD     | TLVGP       | GGQSLSGGQ     | RQRVALARARLRD | TPVILDEVT    |
| 66_9925  | KVKAACEMALLQSTI  | IAGLPQGLD     | TLVGP       | GGQSLSGGQ     | RQRVALARARLRD | TPVILDEVT    |
| 67_10374 | KVKAACEMALLQSTI  | IAGLPQGLD     | TLVGP       | GGQSLSGGQ     | RQRVALARARLRD | TPVILDEVT    |
| 68_3713  | KVKAACEMALLQSTI  | IAGLPQGLD     | TLVGP       | GGQSLSGGQ     | RQRVALARARLRD | TPVILDEVT    |
| 69_4511  | KVKAACEMALLQSTI  | IAGLPQGLD     | TLVGP       | GGQSLSGGQ     | RQRVALARARLRD | TPVILDEVT    |
| 70_6201  | KVKAACEMALLQSTI  | IAGLPQGLD     | TLVGP       | GGQSLSGGQ     | RQRVALARARLRD | TPVILDEVT    |
| 71_3261  | KVKAACEMALLQSTI  | IAGLPQGLD     | TLVGP       | GGQSLSGGQ     | RQRVALARARLRD | TPVILDEVT    |
| 72_8516  | KVKAACEMALLQSTI  | IAGLPQGLD     | TLVGP       | GGQSLSGGQ     | RQRVALARARLRD | TPVILDEVT    |
| 73_9295  | KVKAACEMALLQSTI  | IAGLPQGLD     | TLVGP       | GGQSLSGGQ     | RQRVALARARLRD | TPVILDEVT    |
| 74_809   | KVKAACEMALLQSTI  | IAGLPQGLD     | TLVGP       | GGQSLSGGQ     | RQRVALARARLRD | TPVILDEVT    |
| 75_7282  | KVKAACEMALLQSTI  | IAGLPQGLD     | TLVGP       | GGQSLSGGQ     | RQRVALARARLRD | TPVILDEVT    |
| 76_4910  | KVKAACEMALLQSTI  | IAGLPQGLD     | TLVGP       | GGQSLSGGQ     | RQRVALARARLRD | TPVILDEVT    |
| 77_10912 | KVKAACEMALLQSTI  | IAGLPQGLD     | TLVGP       | GGQSLSGGQ     | RQRVALARARLRD | TPVILDEVT    |
| 78_4020  | KVKAACEMALLQSTI  | IAGLPQGLD     | TLVGP       | GGQSLSGGQ     | RQRVALARARLRD | TPVILDEVT    |
| 79_6703  | KVKAACEMALLQSTI  | IAGLPQGLD     | TLVGP       | GGQSLSGGQ     | RQRVALARARLRD | TPVILDEVT    |
| 80_8619  | KVKAACEMALLQSTI  | IAGLPQGLD     | TLVGP       | GGQSLSGGQ     | RQRVALARARLRD | TPVILDEVT    |
| 81_4126  | STIAGLPQGLD      | TLVGP         | GGQSLSGGQ   | RQRVALARARLRD | TPVILDEVT     | SGLDPKSKLMIM |
| 82_1363  | KVKAACEMALLQSTI  | IAGLPQGLD     | TLVGP       | GGQSLSGGQ     | RQRVALARARLRD | TPVILDEVT    |
| 83_5813  | KVKAACEMALLQSTI  | IAGLPQGLD     | TLVGP       | GGQSLSGGQ     | RQRVALARARLRD | TPVILDEVT    |
| 84_2044  | KVKAACEMALLQSTI  | IAGLPQGLD     | TLVGP       | GGQSLSGGQ     | RQRVALARARLRD | TPVILDEVT    |
| 85_7617  | KVKAACEMALLQSTI  | IAGLPQGLD     | TLVGP       | GGQSLSGGQ     | RQRVALARARLRD | TPVILDEVT    |
| 86_1530  | KVKAACEMALLQSTI  | IAGLPQGLD     | TLVGP       | GGQSLSGGQ     | RQRVALARARLRD | TPVILDEVT    |
| 87_1890  | KVKAACEMALLQSTI  | IAGLPQGLD     | TLVGP       | GGQSLSGGQ     | RQRVALARARLRD | TPVILDEVT    |
| 88_7049  | KVKAACEMALLQSTI  | IAGLPQGLD     | TLVGP       | GGQSLSGGQ     | RQRVALARARLRD | TPVILDEVT    |
| 89_440   | KVKAACEMALLQSTI  | IAGLPQGLD     | TLVGP       | GGQSLSGGQ     | RQRVALARARLRD | TPVILDEVT    |
| 90_4331  | KVKAACEMALLQSTI  | IAGLPQGLD     | TLVGP       | GGQSLSGGQ     | RQRVALARARLRD | TPVILDEVT    |

|          | 610                  | 620                 | 630                | 640        | 650           | 660 |
|----------|----------------------|---------------------|--------------------|------------|---------------|-----|
| 1_1896   | SGLDPKSKLMIMDAIRYWRS | GRTTIVITHDVSQVGDD   | YVYVMDKAEVRE       | EGLCKQLLSS |               |     |
| 2_4785   | SGLDPKSKLMIMDAIRYWRS | GRTTIVITHDVSQVGDD   | YVYVMDKAEVRE       | EGLCKQLLSS |               |     |
| 3_3653   | SGLDPKSKLMIMDAIRYWRS | GRTTIVITHDVSQVGDD   | YVYVMDKAEVRE       | EGLCKQLLSS |               |     |
| 4_8157   | SGLDPKSKLMIMDAIRYWRS | GRTTIVITHDVSQVGDD   | YVYVMDKAEVRE       | EGLCKQLLSS |               |     |
| 5_752    | SGLDPKSKLMIMDAIRYWRS | GRTTIVITHDVSQVGDD   | YVYVMDKAEVRE       | EGLCKQLLSS |               |     |
| 6_8853   | SGLDPKSKLMIMDAIRYWRS | GRTTIVITHDVSQVGDD   | YVYVMDKAEVRE       | EGLCKQLLSS |               |     |
| 7_4015   | KNVMGKGARGGKRGMKDGT  | NEEAKEETTSTTEQMSTY  | QILKTVWPALDAKHRIYA | VVALF      |               |     |
| 8_2020   | SGLDPKSKLMIMDAIRYWRS | GRTTIVITHDVSQVGDD   | YVYVMDKAEVRE       | EGLCKQLLSS |               |     |
| 9_1829   | SGLDPKSKLMIMDAIRYWRS | GRTTIVITHDVSQVGDD   | YVYVMDKAEVRE       | EGLCKQLLSS |               |     |
| 10_6452  | SGLDPKSKLMIMDAIRYWRS | GRTTIVITHDVSQVGDD   | YVYVMDKAEVRE       | EGLCKQLLSS |               |     |
| 11_8627  | SGLDPKSKLMIMDAIRYWRS | GRTTIVITHDVSQVGDD   | YVYVMDKAEVRE       | EGLCKQLLSS |               |     |
| 12_6118  | SGLDPKSKLMIMDAIRYWRS | GRTTIVITHDVSQVGDD   | YVYVMDKAEVRE       | EGLCKQLLSS |               |     |
| 13_2688  | SGLDPKSKLMIMDAIRYWRS | GRTTIVITHDVSQVGDD   | YVYVMDKAEVRE       | EGLCKQLLSS |               |     |
| 14_6406  | SGLDPKSKLMIMDAIRYWRS | GRTTIVITHDVSQVGDD   | YVYVMDKAEVRE       | EGLCKQLLSS |               |     |
| 15_9419  | SGLDPKSKLMIMDAIRYWRS | GRTTIVITHDVSQVGDD   | YVYVMDKAEVRE       | EGLCKQLLSS |               |     |
| 16_8507  | SGLDPKSKLMIMDAIRYWRS | GRTTIVITHDVSQVGDD   | YVYVMDKAEVRE       | EGLCKQLLSS |               |     |
| 17_5884  | SGLDPKSKLMIMDAIRYWRS | GRTTIVITHDVSQVGDD   | YVYVMDKAEVRE       | EGLCKQLLSS |               |     |
| 18_2670  | SGLDPKSKLMIMDAIRYWRS | GRTTIVITHDVSQVGDD   | YVYVMDKAEVRE       | EGLCKQLLSS |               |     |
| 19_5172  | SGLDPKSKLMIMDAIRYWRS | GRTTIVITHDVSQVGDD   | YVYVMDKAEVRE       | EGLCKQLLSS |               |     |
| 20_8057  | SGLDPKSKLMIMDAIRYWRS | GRTTIVITHDVSQVGDD   | YVYVMDKAEVRE       | EGLCKQLLSS |               |     |
| 21_4920  | AVFPFVGLCVFFSTRTSEK  | WEALSNESAEATGGILSS  | VVSDIRVRAFLLEKFFG  | DRFEA      |               |     |
| 22_6393  | SGLDPKSKLMIMDAIRYWRS | GRTTIVITHDVSQVGDD   | YVYVMDKAEVRE       | EGLCKQLLSS |               |     |
| 23_8263  | SGLDPKSKLMIMDAIRYWRS | GRTTIVITHDVSQVGDD   | YVYVMDKAEVRE       | EGLCKQLLSS |               |     |
| 24_8248  | SGLDPKSKLMIMDAIRYWRS | GRTTIVITHDVSQVGDD   | YVYVMDKAEVRE       | EGLCKQLLSS |               |     |
| 25_6733  | SGLDPKSKLMIMDAIRYWRS | GRTTIVITHDVSQVGDD   | YVYVMDKAEVRE       | EGLCKQLLSS |               |     |
| 26_2277  | SGLDPKSKLMIMDAIRYWRS | GRTTIVITHDVSQVGDD   | YVYVMDKAEVRE       | EGLCKQLLSS |               |     |
| 27_2623  | SGLDPKSKLMIMDAIRYWRS | GRTTIVITHDVSQVGDD   | YVYVMDKAEVRE       | EGLCKQLLSS |               |     |
| 28_7413  | SGLDPKSKLMIMDAIRYWRS | GRTTIVITHDVSQVGDD   | YVYVMDKAEVRE       | EGLCKQLLSS |               |     |
| 29_8980  | SGLDPKSKLMIMDAIRYWRS | GRTTIVITHDVSQVGDD   | YVYVMDKAEVRE       | EGLCKQLLSS |               |     |
| 30_8706  | SGLDPKSKLMIMDAIRYWRS | GRTTIVITHDVSQVGDD   | YVYVMDKAEVRE       | EGLCKQLLSS |               |     |
| 31_6378  | SGLDPKSKLMIMDAIRYWRS | GRTTIVITHDVSQVGDD   | YVYVMDKAEVRE       | EGLCKQLLSS |               |     |
| 32_4679  | SGLDPKSKLMIMDAIRYWRS | GRTTIVITHDVSQVGDD   | YVYVMDKAEVRE       | EGLCKQLLSS |               |     |
| 33_2437  | SGLDPKSKLMIMDAIRYWRS | GRTTIVITHDVSQVGDD   | YVYVMDKAEVRE       | EGLCKQLLSS |               |     |
| 34_9700  | SGLDPKSKLMIMDAIRYWRS | GRTTIVITHDVSQVGDD   | YVYVMDKAEVRE       | EGLCKQLLSS |               |     |
| 35_10218 | SGLDPKSKLMIMDAIRYWRS | GRTTIVITHDVSQVGDD   | YVYVMDKAEVRE       | EGLCKQLLSS |               |     |
| 36_2652  | SGLDPKSKLMIMDAIRYWRS | GRTTIVITHDVSQVGDD   | YVYVMDKAEVRE       | EGLCKQLLSS |               |     |
| 37_5779  | SGLDPKSKLMIMDAIRYWRS | GRTTIVITHDVSQVGDD   | YVYVMDKAEVRE       | EGLCKQLLSS |               |     |
| 38_654   | SGLDPKSKLMIMDAIRYWRS | GRTTIVITHDVSQVGDD   | YVYVMDKAEVRE       | EGLCKQLLSS |               |     |
| 39_4879  | SGLDPKSKLMIMDAIRYWRS | GRTTIVITHDVSQVGDD   | YVYVMDKAEVRE       | EGLCKQLLSS |               |     |
| 40_8113  | SGLDPKSKLMIMDAIRYWRS | GRTTIVITHDVSQVGDD   | YVYVMDKAEVRE       | EGLCKQLLSS |               |     |
| 41_1767  | DAIRYWRS             | GRTTIVITHDVSQVGDD   | YVYVMDKAEVRE       | EGLCKQLLSS | SRDGYFLQLRALA |     |
| 42_8428  | SGLDPKSKLMIMDAIRYWRS | GRTTIVITHDVSQVGDD   | YVYVMDKAEVRE       | EGLCKQLLSS |               |     |
| 43_9819  | SGLDPKSKLMIMDAIRYWRS | GRTTIVITHDVSQVGDD   | YVYVMDKAEVRE       | EGLCKQLLSS |               |     |
| 44_5569  | SGLDPKSKLMIMDAIRYWRS | GRTTIVITHDVSQVGDD   | YVYVMDKAEVRE       | EGLCKQLLSS |               |     |
| 45_4189  | SGLDPKSKLMIMDAIRYWRS | GRTTIVITHDVSQVGDD   | YVYVMDKAEVRE       | EGLCKQLLSS |               |     |
| 46_1027  | SGLDPKSKLMIMDAIRYWRS | GRTTIVITHDVSQVGDD   | YVYVMDKAEVRE       | EGLCKQLLSS |               |     |
| 47_5048  | SGLDPKSKLMIMDAIRYWRS | GRTTIVITHDVSQVGDD   | YVYVMDKAEVRE       | EGLCKQLLSS |               |     |
| 48_10124 | SGLDPKSKLMIMDAIRYWRS | GRTTIVITHDVSQVGDD   | YVYVMDKAEVRE       | EGLCKQLLSS |               |     |
| 49_7151  | SGLDPKSKLMIMDAIRYWRS | GRTTIVITHDVSQVGDD   | YVYVMDKAEVRE       | EGLCKQLLSS |               |     |
| 50_3695  | SGLDPKSKLMIMDAIRYWRS | GRTTIVITHDVSQVGDD   | YVYVMDKAEVRE       | EGLCKQLLSS |               |     |
| 51_364   | SGLDPKSKLMIMDAIRYWRS | GRTTIVITHDVSQVGDD   | YVYVMDKAEVRE       | EGLCKQLLSS |               |     |
| 52_242   | SGLDPKSKLMIMDAIRYWRS | GRTTIVITHDVSQVGDD   | YVYVMDKAEVRE       | EGLCKQLLSS |               |     |
| 53_5225  | SGLDPKSKLMIMDAIRYWRS | GRTTIVITHDVSQVGDD   | YVYVMDKAEVRE       | EGLCKQLLSS |               |     |
| 54_1635  | SGLDPKSKLMIMDAIRYWRS | GRTTIVITHDVSQVGDD   | YVYVMDKAEVRE       | EGLCKQLLSS |               |     |
| 55_5766  | SGLDPKSKLMIMDAIRYWRS | GRTTIVITHDVSQVGDD   | YVYVMDKAEVRE       | EGLCKQLLSS |               |     |
| 56_1557  | SGLDPKSKLMIMDAIRYWRS | GRTTIVITHDVSQVGDD   | YVYVMDKAEVRE       | EGLCKQLLSS |               |     |
| 57_10137 | SGLDPKSKLMIMDAIRYWRS | GRTTIVITHDVSQVGDD   | YVYVMDKAEVRE       | EGLCKQLLSS |               |     |
| 58_10525 | SGLDPKSKLMIMDAIRYWRS | GRTTIVITHDVSQVGDD   | YVYVMDKAEVRE       | EGLCKQLLSS |               |     |
| 59_3457  | SGLDPKSKLMIMDAIRYWRS | GRTTIVITHDVSQVGDD   | YVYVMDKAEVRE       | EGLCKQLLSS |               |     |
| 60_8244  | SGLDPKSKLMIMDAIRYWRS | GRTTIVITHDVSQVGDD   | YVYVMDKAEVRE       | EGLCKQLLSS |               |     |
| 61_7964  | SGLDPKSKLMIMDAIRYWRS | GRTTIVITHDVSQVGDD   | YVYVMDKAEVRE       | EGLCKQLLSS |               |     |
| 62_4413  | SGLDPKSKLMIMDAIRYWRS | GRTTIVITHDVSQVGDD   | YVYVMDKAEVRE       | EGLCKQLLSS |               |     |
| 63_6958  | SGLDPKSKLMIMDAIRYWRS | GRTTIVITHDVSQVGDD   | YVYVMDKAEVRE       | EGLCKQLLSS |               |     |
| 64_5997  | TGIWGGIHCSI          | SQLVVVIFTFGVFLTTAES | VNVGDI IQVGNLLMFT  | VGSA       | TMMMSNIP      |     |
| 65_8711  | SGLDPKSKLMIMDAIRYWRS | GRTTIVITHDVSQVGDD   | YVYVMDKAEVRE       | EGLCKQLLSS |               |     |
| 66_9925  | SGLDPKSKLMIMDAIRYWRS | GRTTIVITHDVSQVGDD   | YVYVMDKAEVRE       | EGLCKQLLSS |               |     |
| 67_10374 | SGLDPKSKLMIMDAIRYWRS | GRTTIVITHDVSQVGDD   | YVYVMDKAEVRE       | EGLCKQLLSS |               |     |
| 68_3713  | SGLDPKSKLMIMDAIRYWRS | GRTTIVITHDVSQVGDD   | YVYVMDKAEVRE       | EGLCKQLLSS |               |     |
| 69_4511  | SGLDPKSKLMIMDAIRYWRS | GRTTIVITHDVSQVGDD   | YVYVMDKAEVRE       | EGLCKQLLSS |               |     |
| 70_6201  | SGLDPKSKLMIMDAIRYWRS | GRTTIVITHDVSQVGDD   | YVYVMDKAEVRE       | EGLCKQLLSS |               |     |
| 71_3261  | SGLDPKSKLMIMDAIRYWRS | GRTTIVITHDVSQVGDD   | YVYVMDKAEVRE       | EGLCKQLLSS |               |     |
| 72_8516  | SGLDPKSKLMIMDAIRYWRS | GRTTIVITHDVSQVGDD   | YVYVMDKAEVRE       | EGLCKQLLSS |               |     |
| 73_9295  | SGLDPKSKLMIMDAIRYWRS | GRTTIVITHDVSQVGDD   | YVYVMDKAEVRE       | EGLCKQLLSS |               |     |
| 74_809   | SGLDPKSKLMIMDAIRYWRS | GRTTIVITHDVSQVGDD   | YVYVMDKAEVRE       | EGLCKQLLSS |               |     |
| 75_7282  | SGLDPKSKLMIMDAIRYWRS | GRTTIVITHDVSQVGDD   | YVYVMDKAEVRE       | EGLCKQLLSS |               |     |
| 76_4910  | SGLDPKSKLMIMDAIRYWRS | GRTTIVITHDVSQVGDD   | YVYVMDKAEVRE       | EGLCKQLLSS |               |     |
| 77_10912 | SGLDPKSKLMIMDAIRYWRS | GRTTIVITHDVSQVGDD   | YVYVMDKAEVRE       | EGLCKQLLSS |               |     |
| 78_4020  | SGLDPKSKLMIMDAIRYWRS | GRTTIVITHDVSQVGDD   | YVYVMDKAEVRE       | EGLCKQLLSS |               |     |
| 79_6703  | SGLDPKSKLMIMDAIRYWRS | GRTTIVITHDVSQVGDD   | YVYVMDKAEVRE       | EGLCKQLLSS |               |     |
| 80_8619  | SGLDPKSKLMIMDAIRYWRS | GRTTIVITHDVSQVGDD   | YVYVMDKAEVRE       | EGLCKQLLSS |               |     |
| 81_4126  | DAIRYWRS             | GRTTIVITHDVSQVGDD   | YVYVMDKAEVRE       | EGLCKQLLSS | SRDGYFLQLRALA |     |
| 82_1363  | SGLDPKSKLMIMDAIRYWRS | GRTTIVITHDVSQVGDD   | YVYVMDKAEVRE       | EGLCKQLLSS |               |     |
| 83_5813  | SGLDPKSKLMIMDAIRYWRS | GRTTIVITHDVSQVGDD   | YVYVMDKAEVRE       | EGLCKQLLSS |               |     |
| 84_2044  | SGLDPKSKLMIMDAIRYWRS | GRTTIVITHDVSQVGDD   | YVYVMDKAEVRE       | EGLCKQLLSS |               |     |
| 85_7617  | SGLDPKSKLMIMDAIRYWRS | GRTTIVITHDVSQVGDD   | YVYVMDKAEVRE       | EGLCKQLLSS |               |     |
| 86_1530  | SGLDPKSKLMIMDAIRYWRS | GRTTIVITHDVSQVGDD   | YVYVMDKAEVRE       | EGLCKQLLSS |               |     |
| 87_1890  | SGLDPKSKLMIMDAIRYWRS | GRTTIVITHDVSQVGDD   | YVYVMDKAEVRE       | EGLCKQLLSS |               |     |
| 88_7049  | SGLDPKSKLMIMDAIRYWRS | GRTTIVITHDVSQVGDD   | YVYVMDKAEVRE       | EGLCKQLLSS |               |     |
| 89_440   | SGLDPKSKLMIMDAIRYWRS | GRTTIVITHDVSQVGDD   | YVYVMDKAEVRE       | EGLCKQLLSS |               |     |
| 90_4331  | SGLDPKSKLMIMDAIRYWRS | GRTTIVITHDVSQVGDD   | YVYVMDKAEVRE       | EGLCKQLLSS |               |     |

|          | 670                 | 680              | 690          | 700    | 710        | 720            |
|----------|---------------------|------------------|--------------|--------|------------|----------------|
| 1_1896   | RDGYFLQLRALAESGADSN | NGPEGVMT         | PEDDLSSLSSSE | DEL    | DVMSGKSFYI | PEPKTTSS       |
| 2_4785   | RDGYFLQLRALAESGADSN | NGPEGVMT         | PEDDLSSLSSSE | DEL    | DVMSGKSFYI | PEPKTTSS       |
| 3_3653   | RDGYFLQLRALAESGADSN | NGPEGVMT         | PEDDLSSLSSSE | DEL    | DVMSGKSFYI | PEPKTTSS       |
| 4_8157   | RDGYFLQLRALAESGADSN | NGPEGVMT         | PEDDLSSLSSSE | DEL    | DVMSGKSFYI | PEPKTTSS       |
| 5_752    | RDGYFLQLRALAESGADSN | NGPEGVMT         | PEDDLSSLSSSE | DEL    | DVMSGKSFYI | PEPKTTSS       |
| 6_8853   | RDGYFLQLRALAESGADSN | NGPEGVMT         | PEDDLSSLSSSE | DEL    | DVMSGKSFYI | PEPKTTSS       |
| 7_4015   | WCIVAAGCSPVFAFVFSN  | LLQAFWAQGS       | KLEAGTKWAIVL | GCVGIL | DFTAVFFT   | FSLAGA         |
| 8_2020   | RDGYFLQLRALAESGADSN | NGPEGVMT         | PEDDLSSLSSSE | DEL    | DVMSGKSFYI | PEPKTTSS       |
| 9_1829   | RDGYFLQLRALAESGADSN | NGPEGVMT         | PEDDLSSLSSSE | DEL    | DVMSGKSFYI | PEPKTTSS       |
| 10_6452  | RDGYFLQLRALAESGADSN | NGPEGVMT         | PEDDLSSLSSSE | DEL    | DVMSGKSFYI | PEPKTTSS       |
| 11_8627  | RDGYFLQLRALAESGADSN | NGPEGVMT         | PEDDLSSLSSSE | DEL    | DVMSGKSFYI | PEPKTTSS       |
| 12_6118  | RDGYFLQLRALAESGADSN | NGPEGVMT         | PEDDLSSLSSSE | DEL    | DVMSGKSFYI | PEPKTTSS       |
| 13_2688  | RDGYFLQLRALAESGADSN | NGPEGVMT         | PEDDLSSLSSSE | DEL    | DVMSGKSFYI | PEPKTTSS       |
| 14_6406  | RDGYFLQLRALAESGADSN | NGPEGVMT         | PEDDLSSLSSSE | DEL    | DVMSGKSFYI | PEPKTTSS       |
| 15_9419  | RDGYFLQLRALAESGADSN | NGPEGVMT         | PEDDLSSLSSSE | DEL    | DVMSGKSFYI | PEPKTTSS       |
| 16_8507  | RDGYFLQLRALAESGADSN | NGPEGVMT         | PEDDLSSLSSSE | DEL    | DVMSGKSFYI | PEPKTTSS       |
| 17_5884  | RDGYFLQLRALAESGADSN | NGPEGVMT         | PEDDLSSLSSSE | DEL    | DVMSGKSFYI | PEPKTTSS       |
| 18_2670  | RDGYFLQLRALAESGADSN | NGPEGVMT         | PEDDLSSLSSSE | DEL    | DVMSGKSFYI | PEPKTTSS       |
| 19_5172  | RDGYFLQLRALAESGADSN | NGPEGVMT         | PEDDLSSLSSSE | DEL    | DVMSGKSFYI | PEPKTTSS       |
| 20_8057  | RDGYFLQLRALAESGADSN | NGPEGVMT         | PEDDLSSLSSSE | DEL    | DVMSGKSFYI | PEPKTTSS       |
| 21_4920  | AAERAF              | TIGKKRGLYTGIWGGI | HCSISQWL     | VVVIFT | PGVFL      | LLTTAESVNVGDI  |
| 22_6393  | RDGYFLQLRALAESGADSN | NGPEGVMT         | PEDDLSSLSSSE | DEL    | DVMSGKSFYI | PEPKTTSS       |
| 23_8263  | RDGYFLQLRALAESGADSN | NGPEGVMT         | PEDDLSSLSSSE | DEL    | DVMSGKSFYI | PEPKTTSS       |
| 24_8248  | RDGYFLQLRALAESGADSN | NGPEGVMT         | PEDDLSSLSSSE | DEL    | DVMSGKSFYI | PEPKTTSS       |
| 25_6733  | RDGYFLQLRALAESGADSN | NGPEGVMT         | PEDDLSSLSSSE | DEL    | DVMSGKSFYI | PEPKTTSS       |
| 26_2277  | RDGYFLQLRALAESGADSN | NGPEGVMT         | PEDDLSSLSSSE | DEL    | DVMSGKSFYI | PEPKTTSS       |
| 27_2623  | RDGYFLQLRALAESGADSN | NGPEGVMT         | PEDDLSSLSSSE | DEL    | DVMSGKSFYI | PEPKTTSS       |
| 28_7413  | RDGYFLQLRALAESGADSN | NGPEGVMT         | PEDDLSSLSSSE | DEL    | DVMSGKSFYI | PEPKTTSS       |
| 29_8980  | RDGYFLQLRALAESGADSN | NGPEGVMT         | PEDDLSSLSSSE | DEL    | DVMSGKSFYI | PEPKTTSS       |
| 30_8706  | RDGYFLQLRALAESGADSN | NGPEGVMT         | PEDDLSSLSSSE | DEL    | DVMSGKSFYI | PEPKTTSS       |
| 31_6378  | RDGYFLQLRALAESGADSN | NGPEGVMT         | PEDDLSSLSSSE | DEL    | DVMSGKSFYI | PEPKTTSS       |
| 32_4679  | RDGYFLQLRALAESGADSN | NGPEGVMT         | PEDDLSSLSSSE | DEL    | DVMSGKSFYI | PEPKTTSS       |
| 33_2437  | RDGYFLQLRALAESGADSN | NGPEGVMT         | PEDDLSSLSSSE | DEL    | DVMSGKSFYI | PEPKTTSS       |
| 34_9700  | RDGYFLQLRALAESGADSN | NGPEGVMT         | PEDDLSSLSSSE | DEL    | DVMSGKSFYI | PEPKTTSS       |
| 35_10218 | RDGYFLQLRALAESGADSN | NGPEGVMT         | PEDDLSSLSSSE | DEL    | DVMSGKSFYI | PEPKTTSS       |
| 36_2652  | RDGYFLQLRALAESGADSN | NGPEGVMT         | PEDDLSSLSSSE | DEL    | DVMSGKSFYI | PEPKTTSS       |
| 37_5779  | RDGYFLQLRALAESGADSN | NGPEGVMT         | PEDDLSSLSSSE | DEL    | DVMSGKSFYI | PEPKTTSS       |
| 38_654   | RDGYFLQLRALAESGADSN | NGPEGVMT         | PEDDLSSLSSSE | DEL    | DVMSGKSFYI | PEPKTTSS       |
| 39_4879  | RDGYFLQLRALAESGADSN | NGPEGVMT         | PEDDLSSLSSSE | DEL    | DVMSGKSFYI | PEPKTTSS       |
| 40_8113  | RDGYFLQLRALAESGADSN | NGPEGVMT         | PEDDLSSLSSSE | DEL    | DVMSGKSFYI | PEPKTTSS       |
| 41_1767  | ESGADSN             | NGPEGVMT         | PEDDLSSLSSSE | DEL    | DVMSGKSFYI | PEPKTTSS       |
| 42_8428  | RDGYFLQLRALAESGADSN | NGPEGVMT         | PEDDLSSLSSSE | DEL    | DVMSGKSFYI | PEPKTTSS       |
| 43_9819  | RDGYFLQLRALAESGADSN | NGPEGVMT         | PEDDLSSLSSSE | DEL    | DVMSGKSFYI | PEPKTTSS       |
| 44_5569  | RDGYFLQLRALAESGADSN | NGPEGVMT         | PEDDLSSLSSSE | DEL    | DVMSGKSFYI | PEPKTTSS       |
| 45_4189  | RDGYFLQLRALAESGADSN | NGPEGVMT         | PEDDLSSLSSSE | DEL    | DVMSGKSFYI | PEPKTTSS       |
| 46_1027  | RDGYFLQLRALAESGADSN | NGPEGVMT         | PEDDLSSLSSSE | DEL    | DVMSGKSFYI | PEPKTTSS       |
| 47_5048  | RDGYFLQLRALAESGADSN | NGPEGVMT         | PEDDLSSLSSSE | DEL    | DVMSGKSFYI | PEPKTTSS       |
| 48_10124 | RDGYFLQLRALAESGADSN | NGPEGVMT         | PEDDLSSLSSSE | DEL    | DVMSGKSFYI | PEPKTTSS       |
| 49_7151  | RDGYFLQLRALAESGADSN | NGPEGVMT         | PEDDLSSLSSSE | DEL    | DVMSGKSFYI | PEPKTTSS       |
| 50_3695  | RDGYFLQLRALAESGADSN | NGPEGVMT         | PEDDLSSLSSSE | DEL    | DVMSGKSFYI | PEPKTTSS       |
| 51_364   | RDGYFLQLRALAESGADSN | NGPEGVMT         | PEDDLSSLSSSE | DEL    | DVMSGKSFYI | PEPKTTSS       |
| 52_242   | RDGYFLQLRALAESGADSN | NGPEGVMT         | PEDDLSSLSSSE | DEL    | DVMSGKSFYI | PEPKTTSS       |
| 53_5225  | RDGYFLQLRALAESGADSN | NGPEGVMT         | PEDDLSSLSSSE | DEL    | DVMSGKSFYI | PEPKTTSS       |
| 54_1635  | RDGYFLQLRALAESGADSN | NGPEGVMT         | PEDDLSSLSSSE | DEL    | DVMSGKSFYI | PEPKTTSS       |
| 55_5766  | RDGYFLQLRALAESGADSN | NGPEGVMT         | PEDDLSSLSSSE | DEL    | DVMSGKSFYI | PEPKTTSS       |
| 56_1557  | RDGYFLQLRALAESGADSN | NGPEGVMT         | PEDDLSSLSSSE | DEL    | DVMSGKSFYI | PEPKTTSS       |
| 57_10137 | RDGYFLQLRALAESGADSN | NGPEGVMT         | PEDDLSSLSSSE | DEL    | DVMSGKSFYI | PEPKTTSS       |
| 58_10525 | RDGYFLQLRALAESGADSN | NGPEGVMT         | PEDDLSSLSSSE | DEL    | DVMSGKSFYI | PEPKTTSS       |
| 59_3457  | RDGYFLQLRALAESGADSN | NGPEGVMT         | PEDDLSSLSSSE | DEL    | DVMSGKSFYI | PEPKTTSS       |
| 60_8244  | RDGYFLQLRALAESGADSN | NGPEGVMT         | PEDDLSSLSSSE | DEL    | DVMSGKSFYI | PEPKTTSS       |
| 61_7964  | RDGYFLQLRALAESGADSN | NGPEGVMT         | PEDDLSSLSSSE | DEL    | DVMSGKSFYI | PEPKTTSS       |
| 62_4413  | RDGYFLQLRALAESGADSN | NGPEGVMT         | PEDDLSSLSSSE | DEL    | DVMSGKSFYI | PEPKTTSS       |
| 63_6958  | RDGYFLQLRALAESGADSN | NGPEGVMT         | PEDDLSSLSSSE | DEL    | DVMSGKSFYI | PEPKTTSS       |
| 64_5997  | QIAAAQAKAAQMLHLAK   | MPRDHPDQ         | QELGKKRL     | LTPL   | TVFNKLR    | FAYPGRDQVLRNVS |
| 65_8711  | RDGYFLQLRALAESGADSN | NGPEGVMT         | PEDDLSSLSSSE | DEL    | DVMSGKSFYI | PEPKTTSS       |
| 66_9925  | RDGYFLQLRALAESGADSN | NGPEGVMT         | PEDDLSSLSSSE | DEL    | DVMSGKSFYI | PEPKTTSS       |
| 67_10374 | RDGYFLQLRALAESGADSN | NGPEGVMT         | PEDDLSSLSSSE | DEL    | DVMSGKSFYI | PEPKTTSS       |
| 68_3713  | RDGYFLQLRALAESGADSN | NGPEGVMT         | PEDDLSSLSSSE | DEL    | DVMSGKSFYI | PEPKTTSS       |
| 69_4511  | RDGYFLQLRALAESGADSN | NGPEGVMT         | PEDDLSSLSSSE | DEL    | DVMSGKSFYI | PEPKTTSS       |
| 70_6201  | RDGYFLQLRALAESGADSN | NGPEGVMT         | PEDDLSSLSSSE | DEL    | DVMSGKSFYI | PEPKTTSS       |
| 71_3261  | RDGYFLQLRALAESGADSN | NGPEGVMT         | PEDDLSSLSSSE | DEL    | DVMSGKSFYI | PEPKTTSS       |
| 72_8516  | RDGYFLQLRALAESGADSN | NGPEGVMT         | PEDDLSSLSSSE | DEL    | DVMSGKSFYI | PEPKTTSS       |
| 73_9295  | RDGYFLQLRALAESGADSN | NGPEGVMT         | PEDDLSSLSSSE | DEL    | DVMSGKSFYI | PEPKTTSS       |
| 74_809   | RDGYFLQLRALAESGADSN | NGPEGVMT         | PEDDLSSLSSSE | DEL    | DVMSGKSFYI | PEPKTTSS       |
| 75_7282  | RDGYFLQLRALAESGADSN | NGPEGVMT         | PEDDLSSLSSSE | DEL    | DVMSGKSFYI | PEPKTTSS       |
| 76_4910  | RDGYFLQLRALAESGADSN | NGPEGVMT         | PEDDLSSLSSSE | DEL    | DVMSGKSFYI | PEPKTTSS       |
| 77_10912 | RDGYFLQLRALAESGADSN | NGPEGVMT         | PEDDLSSLSSSE | DEL    | DVMSGKSFYI | PEPKTTSS       |
| 78_4020  | RDGYFLQLRALAESGADSN | NGPEGVMT         | PEDDLSSLSSSE | DEL    | DVMSGKSFYI | PEPKTTSS       |
| 79_6703  | RDGYFLQLRALAESGADSN | NGPEGVMT         | PEDDLSSLSSSE | DEL    | DVMSGKSFYI | PEPKTTSS       |
| 80_8619  | RDGYFLQLRALAESGADSN | NGPEGVMT         | PEDDLSSLSSSE | DEL    | DVMSGKSFYI | PEPKTTSS       |
| 81_4126  | ESGADSN             | NGPEGVMT         | PEDDLSSLSSSE | DEL    | DVMSGKSFYI | PEPKTTSS       |
| 82_1363  | RDGYFLQLRALAESGADSN | NGPEGVMT         | PEDDLSSLSSSE | DEL    | DVMSGKSFYI | PEPKTTSS       |
| 83_5813  | RDGYFLQLRALAESGADSN | NGPEGVMT         | PEDDLSSLSSSE | DEL    | DVMSGKSFYI | PEPKTTSS       |
| 84_2044  | RDGYFLQLRALAESGADSN | NGPEGVMT         | PEDDLSSLSSSE | DEL    | DVMSGKSFYI | PEPKTTSS       |
| 85_7617  | RDGYFLQLRALAESGADSN | NGPEGVMT         | PEDDLSSLSSSE | DEL    | DVMSGKSFYI | PEPKTTSS       |
| 86_1530  | RDGYFLQLRALAESGADSN | NGPEGVMT         | PEDDLSSLSSSE | DEL    | DVMSGKSFYI | PEPKTTSS       |
| 87_1890  | RDGYFLQLRALAESGADSN | NGPEGVMT         | PEDDLSSLSSSE | DEL    | DVMSGKSFYI | PEPKTTSS       |
| 88_7049  | RDGYFLQLRALAESGADSN | NGPEGVMT         | PEDDLSSLSSSE | DEL    | DVMSGKSFYI | PEPKTTSS       |
| 89_440   | RDGYFLQLRALAESGADSN | NGPEGVMT         | PEDDLSSLSSSE | DEL    | DVMSGKSFYI | PEPKTTSS       |
| 90_4331  | RDGYFLQLRALAESGADSN | NGPEGVMT         | PEDDLSSLSSSE | DEL    | DVMSGKSFYI | PEPKTTSS       |

|          | 730 | 740 | 750 | 760 | 770 | 780 |
|----------|-----|-----|-----|-----|-----|-----|
| 1_1896   | F   | G   | A   | L   | G   | R   |
| 2_4785   | F   | G   | A   | L   | G   | R   |
| 3_3653   | F   | G   | A   | L   | G   | R   |
| 4_8157   | F   | G   | A   | L   | G   | R   |
| 5_752    | F   | G   | A   | L   | G   | R   |
| 6_8853   | F   | G   | A   | L   | G   | R   |
| 7_4015   | V   | A   | Q   | E   | W   | V   |
| 8_2020   | F   | G   | A   | L   | G   | R   |
| 9_1829   | F   | G   | A   | L   | G   | R   |
| 10_6452  | F   | G   | A   | L   | G   | R   |
| 11_8627  | F   | G   | A   | L   | G   | R   |
| 12_6118  | F   | G   | A   | L   | G   | R   |
| 13_2688  | F   | G   | A   | L   | G   | R   |
| 14_6406  | F   | G   | A   | L   | G   | R   |
| 15_9419  | F   | G   | A   | L   | G   | R   |
| 16_8507  | F   | G   | A   | L   | G   | R   |
| 17_5884  | F   | G   | A   | L   | G   | R   |
| 18_2670  | F   | G   | A   | L   | G   | R   |
| 19_5172  | F   | G   | A   | L   | G   | R   |
| 20_8057  | F   | G   | A   | L   | G   | R   |
| 21_4920  | M   | F   | T   | V   | G   | S   |
| 22_6393  | F   | G   | A   | L   | G   | R   |
| 23_8263  | F   | G   | A   | L   | G   | R   |
| 24_8248  | F   | G   | A   | L   | G   | R   |
| 25_6733  | F   | G   | A   | L   | G   | R   |
| 26_2277  | F   | G   | A   | L   | G   | R   |
| 27_2623  | F   | G   | A   | L   | G   | R   |
| 28_7413  | F   | G   | A   | L   | G   | R   |
| 29_8980  | F   | G   | A   | L   | G   | R   |
| 30_8706  | F   | G   | A   | L   | G   | R   |
| 31_6378  | F   | G   | A   | L   | G   | R   |
| 32_4679  | F   | G   | A   | L   | G   | R   |
| 33_2437  | F   | G   | A   | L   | G   | R   |
| 34_9700  | F   | G   | A   | L   | G   | R   |
| 35_10218 | F   | G   | A   | L   | G   | R   |
| 36_2652  | F   | G   | A   | L   | G   | R   |
| 37_5779  | F   | G   | A   | L   | G   | R   |
| 38_654   | F   | G   | A   | L   | G   | R   |
| 39_4879  | F   | G   | A   | L   | G   | R   |
| 40_8113  | F   | G   | A   | L   | G   | R   |
| 41_1767  | P   | G   | T   | N   | G   | P   |
| 42_8428  | F   | G   | A   | L   | G   | R   |
| 43_9819  | F   | G   | A   | L   | G   | R   |
| 44_5569  | F   | G   | A   | L   | G   | R   |
| 45_4189  | F   | G   | A   | L   | G   | R   |
| 46_1027  | F   | G   | A   | L   | G   | R   |
| 47_5048  | F   | G   | A   | L   | G   | R   |
| 48_10124 | F   | G   | A   | L   | G   | R   |
| 49_7151  | F   | G   | A   | L   | G   | R   |
| 50_3695  | F   | G   | A   | L   | G   | R   |
| 51_364   | F   | G   | A   | L   | G   | R   |
| 52_242   | F   | G   | A   | L   | G   | R   |
| 53_5225  | F   | G   | A   | L   | G   | R   |
| 54_1635  | F   | G   | A   | L   | G   | R   |
| 55_5766  | F   | G   | A   | L   | G   | R   |
| 56_1557  | F   | G   | A   | L   | G   | R   |
| 57_10137 | F   | G   | A   | L   | G   | R   |
| 58_10525 | F   | G   | A   | L   | G   | R   |
| 59_3457  | F   | G   | A   | L   | G   | R   |
| 60_8244  | F   | G   | A   | L   | G   | R   |
| 61_7964  | F   | G   | A   | L   | G   | R   |
| 62_4413  | F   | G   | A   | L   | G   | R   |
| 63_6958  | F   | G   | A   | L   | G   | R   |
| 64_5997  | L   | S   | I   | P   | S   | E   |
| 65_8711  | F   | G   | A   | L   | G   | R   |
| 66_9925  | F   | G   | A   | L   | G   | R   |
| 67_10374 | F   | G   | A   | L   | G   | R   |
| 68_3713  | F   | G   | A   | L   | G   | R   |
| 69_4511  | F   | G   | A   | L   | G   | R   |
| 70_6201  | F   | G   | A   | L   | G   | R   |
| 71_3261  | F   | G   | A   | L   | G   | R   |
| 72_8516  | F   | G   | A   | L   | G   | R   |
| 73_9295  | F   | G   | A   | L   | G   | R   |
| 74_809   | F   | G   | A   | L   | G   | R   |
| 75_7282  | F   | G   | A   | L   | G   | R   |
| 76_4910  | F   | G   | A   | L   | G   | R   |
| 77_10912 | F   | G   | A   | L   | G   | R   |
| 78_4020  | F   | G   | A   | L   | G   | R   |
| 79_6703  | F   | G   | A   | L   | G   | R   |
| 80_8619  | F   | G   | A   | L   | G   | R   |
| 81_4126  | P   | G   | T   | N   | G   | P   |
| 82_1363  | F   | G   | A   | L   | G   | R   |
| 83_5813  | F   | G   | A   | L   | G   | R   |
| 84_2044  | F   | G   | A   | L   | G   | R   |
| 85_7617  | F   | G   | A   | L   | G   | R   |
| 86_1530  | F   | G   | A   | L   | G   | R   |
| 87_1890  | F   | G   | A   | L   | G   | R   |
| 88_7049  | F   | G   | A   | L   | G   | R   |
| 89_440   | F   | G   | A   | L   | G   | R   |
| 90_4331  | F   | G   | A   | L   | G   | R   |



|          | 790 | 800 | 810 | 820 | 830 | 840 |
|----------|-----|-----|-----|-----|-----|-----|
| 1_1896   | R   | G   | S   | I   | D   | L   |
| 2_4785   | I   | Q   | A   | R   | G   | L   |
| 3_3653   | S   | A   | L   | A   | N   | R   |
| 4_8157   | S   | P   | V   | K   | R   | P   |
| 5_752    | L   | P   | Q   | G   | G   | R   |
| 6_8853   | I   | G   | G   | V   | L   | R   |
| 7_4015   | R   | S   | S   | P   | I   | E   |
| 8_2020   | D   | V   | E   | M   | S   | P   |
| 9_1829   | F   | R   | D   | H   | D   | K   |
| 10_6452  | G   | V   |     |     |     |     |
| 11_8627  |     |     |     |     |     |     |
| 12_6118  |     |     |     |     |     |     |
| 13_2688  |     |     |     |     |     |     |
| 14_6406  |     |     |     |     |     |     |
| 15_9419  |     |     |     |     |     |     |
| 16_8507  |     |     |     |     |     |     |
| 17_5884  |     |     |     |     |     |     |
| 18_2670  |     |     |     |     |     |     |
| 19_5172  |     |     |     |     |     |     |
| 20_8057  |     |     |     |     |     |     |
| 21_4920  |     |     |     |     |     |     |
| 22_6393  |     |     |     |     |     |     |
| 23_8263  |     |     |     |     |     |     |
| 24_8248  |     |     |     |     |     |     |
| 25_6733  |     |     |     |     |     |     |
| 26_2277  |     |     |     |     |     |     |
| 27_2623  |     |     |     |     |     |     |
| 28_7413  |     |     |     |     |     |     |
| 29_8980  |     |     |     |     |     |     |
| 30_8706  |     |     |     |     |     |     |
| 31_6378  |     |     |     |     |     |     |
| 32_4679  |     |     |     |     |     |     |
| 33_2437  |     |     |     |     |     |     |
| 34_9700  |     |     |     |     |     |     |
| 35_10218 |     |     |     |     |     |     |
| 36_2652  |     |     |     |     |     |     |
| 37_5779  |     |     |     |     |     |     |
| 38_654   |     |     |     |     |     |     |
| 39_4879  |     |     |     |     |     |     |
| 40_8113  |     |     |     |     |     |     |
| 41_1767  |     |     |     |     |     |     |
| 42_8428  |     |     |     |     |     |     |
| 43_9819  |     |     |     |     |     |     |
| 44_5569  |     |     |     |     |     |     |
| 45_4189  |     |     |     |     |     |     |
| 46_1027  |     |     |     |     |     |     |
| 47_5048  |     |     |     |     |     |     |
| 48_10124 |     |     |     |     |     |     |
| 49_7151  |     |     |     |     |     |     |
| 50_3695  |     |     |     |     |     |     |
| 51_364   |     |     |     |     |     |     |
| 52_242   |     |     |     |     |     |     |
| 53_5225  |     |     |     |     |     |     |
| 54_1635  |     |     |     |     |     |     |
| 55_5766  |     |     |     |     |     |     |
| 56_1557  |     |     |     |     |     |     |
| 57_10137 |     |     |     |     |     |     |
| 58_10525 |     |     |     |     |     |     |
| 59_3457  |     |     |     |     |     |     |
| 60_8244  |     |     |     |     |     |     |
| 61_7964  |     |     |     |     |     |     |
| 62_4413  |     |     |     |     |     |     |
| 63_6958  |     |     |     |     |     |     |
| 64_5997  |     |     |     |     |     |     |
| 65_8711  |     |     |     |     |     |     |
| 66_9925  |     |     |     |     |     |     |
| 67_10374 |     |     |     |     |     |     |
| 68_3713  |     |     |     |     |     |     |
| 69_4511  |     |     |     |     |     |     |
| 70_6201  |     |     |     |     |     |     |
| 71_3261  |     |     |     |     |     |     |
| 72_8516  |     |     |     |     |     |     |
| 73_9295  |     |     |     |     |     |     |
| 74_809   |     |     |     |     |     |     |
| 75_7282  |     |     |     |     |     |     |
| 76_4910  |     |     |     |     |     |     |
| 77_10912 |     |     |     |     |     |     |
| 78_4020  |     |     |     |     |     |     |
| 79_6703  |     |     |     |     |     |     |
| 80_8619  |     |     |     |     |     |     |
| 81_4126  |     |     |     |     |     |     |
| 82_1363  |     |     |     |     |     |     |
| 83_5813  |     |     |     |     |     |     |
| 84_2044  |     |     |     |     |     |     |
| 85_7617  |     |     |     |     |     |     |
| 86_1530  |     |     |     |     |     |     |
| 87_1890  |     |     |     |     |     |     |
| 88_7049  |     |     |     |     |     |     |
| 89_440   |     |     |     |     |     |     |
| 90_4331  |     |     |     |     |     |     |

|          | 850      | 860     | 870     | 880      | 890                    | 900                              |
|----------|----------|---------|---------|----------|------------------------|----------------------------------|
| 1_1896   | KEVVREIR | EAIGKGT | GAGKRGV | TKRQARR  | GKKDGPDE               | EATNTTGHMPAYQILKTVWPAL           |
| 2_4785   | KEVVREIR | EAIGKGT | GAGKRGV | TKRQARR  | GKKDGPDE               | EATNTTGHMPAYQILKTVWPAL           |
| 3_3653   | KEVVREIR | EAIGKGT | GAGKRGV | TKRQARR  | GKKDGPDE               | EATNTTGHMPAYQILKTVWPAL           |
| 4_8157   | KEVVREIR | EAIGKGT | GAGKRGV | TKRQARR  | GKKDGPDE               | EATNTTGHMPAYQILKTVWPAL           |
| 5_752    | KEVVREIR | EAIGKGT | GAGKRGV | TKRQARR  | GKKDGPDE               | EATNTTGHMPAYQILKTVWPAL           |
| 6_8853   | KEVVREIR | EAIGKGT | GAGKRGV | TKRQARR  | GKKDGPDE               | EATNTTGHMPAYQILKTVWPAL           |
| 7_4015   | VVSDIR   | VVRAFL  | LEKFFG  | DRFEAA   | VERAFT                 | TIGKKRGLYTGIIWSGIHCSISQWLVVVIFTF |
| 8_2020   | KEVVREIR | EAIGKGT | GAGKRGV | TKRQARR  | GKKDGPDE               | EATNTTGHMPAYQILKTVWPAL           |
| 9_1829   | KEVVREIR | EAIGKGT | GAGKRGV | TKRQARR  | GKKDGPDE               | EATNTTGHMPAYQILKTVWPAL           |
| 10_6452  | KEVVREIR | EAIGKGT | GAGKRGV | TKRQARR  | GKKDGPDE               | EATNTTGHMPAYQILKTVWPAL           |
| 11_8627  | KEVVREIR | EAIGKGT | GAGKRGV | TKRQARR  | GKKDGPDE               | EATNTTGHMPAYQILKTVWPAL           |
| 12_6118  | KEVVREIR | EAIGKGT | GAGKRGV | TKRQARR  | GKKDGPDE               | EATNTTGHMPAYQILKTVWPAL           |
| 13_2688  | KEVVREIR | EAIGKGT | GAGKRGV | TKRQARR  | GKKDGPDE               | EATNTTGHMPAYQILKTVWPAL           |
| 14_6406  | KEVVREIR | EAIGKGT | GAGKRGV | TKRQARR  | GKKDGPDE               | EATNTTGHMPAYQILKTVWPAL           |
| 15_9419  | KEVVREIR | EAIGKGT | GAGKRGV | TKRQARR  | GKKDGPDE               | EATNTTGHMPAYQILKTVWPAL           |
| 16_8507  | KEVVREIR | EAIGKGT | GAGKRGV | TKRQARR  | GKKDGPDE               | EATNTTGHMPAYQILKTVWPAL           |
| 17_5884  | KEVVREIR | EAIGKGT | GAGKRGV | TKRQARR  | GKKDGPDE               | EATNTTGHMPAYQILKTVWPAL           |
| 18_2670  | KEVVREIR | EAIGKGT | GAGKRGV | TKRQARR  | GKKDGPDE               | EATNTTGHMPAYQILKTVWPAL           |
| 19_5172  | KEVVREIR | EAIGKGT | GAGKRGV | TKRQARR  | GKKDGPDE               | EATNTTGHMPAYQILKTVWPAL           |
| 20_8057  | KEVVREIR | EAIGKGT | GAGKRGV | TKRQARR  | GKKDGPDE               | EATNTTGHMPAYQILKTVWPAL           |
| 21_4920  | PKASR    | KGNFEV  | ISPVVSY | PLGPVASS | PLPSLVYS               | SPPGGTRASSHRRSGELGALTYAGFD       |
| 22_6393  | KEVVREIR | EAIGKGT | GAGKRGV | TKRQARR  | GKKDGPDE               | EATNTTGHMPAYQILKTVWPAL           |
| 23_8263  | KEVVREIR | EAIGKGT | GAGKRGV | TKRQARR  | GKKDGPDE               | EATNTTGHMPAYQILKTVWPAL           |
| 24_8248  | KEVVREIR | EAIGKGT | GAGKRGV | TKRQARR  | GKKDGPDE               | EATNTTGHMPAYQILKTVWPAL           |
| 25_6733  | KEVVREIR | EAIGKGT | GAGKRGV | TKRQARR  | GKKDGPDE               | EATNTTGHMPAYQILKTVWPAL           |
| 26_2277  | KEVVREIR | EAIGKGT | GAGKRGV | TKRQARR  | GKKDGPDE               | EATNTTGHMPAYQILKTVWPAL           |
| 27_2623  | KEVVREIR | EAIGKGT | GAGKRGV | TKRQARR  | GKKDGPDE               | EATNTTGHMPAYQILKTVWPAL           |
| 28_7413  | KEVVREIR | EAIGKGT | GAGKRGV | TKRQARR  | GKKDGPDE               | EATNTTGHMPAYQILKTVWPAL           |
| 29_8980  | KEVVREIR | EAIGKGT | GAGKRGV | TKRQARR  | GKKDGPDE               | EATNTTGHMPAYQILKTVWPAL           |
| 30_8706  | KEVVREIR | EAIGKGT | GAGKRGV | TKRQARR  | GKKDGPDE               | EATNTTGHMPAYQILKTVWPAL           |
| 31_6378  | KEVVREIR | EAIGKGT | GAGKRGV | TKRQARR  | GKKDGPDE               | EATNTTGHMPAYQILKTVWPAL           |
| 32_4679  | KEVVREIR | EAIGKGT | GAGKRGV | TKRQARR  | GKKDGPDE               | EATNTTGHMPAYQILKTVWPAL           |
| 33_2437  | KEVVREIR | EAIGKGT | GAGKRGV | TKRQARR  | GKKDGPDE               | EATNTTGHMPAYQILKTVWPAL           |
| 34_9700  | KEVVREIR | EAIGKGT | GAGKRGV | TKRQARR  | GKKDGPDE               | EATNTTGHMPAYQILKTVWPAL           |
| 35_10218 | KEVVREIR | EAIGKGT | GAGKRGV | TKRQARR  | GKKDGPDE               | EATNTTGHMPAYQILKTVWPAL           |
| 36_2652  | KEVVREIR | EAIGKGT | GAGKRGV | TKRQARR  | GKKDGPDE               | EATNTTGHMPAYQILKTVWPAL           |
| 37_5779  | KEVVREIR | EAIGKGT | GAGKRGV | TKRQARR  | GKKDGPDE               | EATNTTGHMPAYQILKTVWPAL           |
| 38_654   | KEVVREIR | EAIGKGT | GAGKRGV | TKRQARR  | GKKDGPDE               | EATNTTGHMPAYQILKTVWPAL           |
| 39_4879  | KEVVREIR | EAIGKGT | GAGKRGV | TKRQARR  | GKKDGPDE               | EATNTTGHMPAYQILKTVWPAL           |
| 40_8113  | KEVVREIR | EAIGKGT | GAGKRGV | TKRQARR  | GKKDGPDE               | EATNTTGHMPAYQILKTVWPAL           |
| 41_1767  | GKGT     | GAGKRGV | TKRQARR | GKKDGPDE | EATNTTGHMPAYQILKTVWPAL | LDTKHRLYAVAAL                    |
| 42_8428  | KEVVREIR | EAIGKGT | GAGKRGV | TKRQARR  | GKKDGPDE               | EATNTTGHMPAYQILKTVWPAL           |
| 43_9819  | KEVVREIR | EAIGKGT | GAGKRGV | TKRQARR  | GKKDGPDE               | EATNTTGHMPAYQILKTVWPAL           |
| 44_5569  | KEVVREIR | EAIGKGT | GAGKRGV | TKRQARR  | GKKDGPDE               | EATNTTGHMPAYQILKTVWPAL           |
| 45_4189  | KEVVREIR | EAIGKGT | GAGKRGV | TKRQARR  | GKKDGPDE               | EATNTTGHMPAYQILKTVWPAL           |
| 46_1027  | KEVVREIR | EAIGKGT | GAGKRGV | TKRQARR  | GKKDGPDE               | EATNTTGHMPAYQILKTVWPAL           |
| 47_5048  | KEVVREIR | EAIGKGT | GAGKRGV | TKRQARR  | GKKDGPDE               | EATNTTGHMPAYQILKTVWPAL           |
| 48_10124 | KEVVREIR | EAIGKGT | GAGKRGV | TKRQARR  | GKKDGPDE               | EATNTTGHMPAYQILKTVWPAL           |
| 49_7151  | KEVVREIR | EAIGKGT | GAGKRGV | TKRQARR  | GKKDGPDE               | EATNTTGHMPAYQILKTVWPAL           |
| 50_3695  | KEVVREIR | EAIGKGT | GAGKRGV | TKRQARR  | GKKDGPDE               | EATNTTGHMPAYQILKTVWPAL           |
| 51_364   | KEVVREIR | EAIGKGT | GAGKRGV | TKRQARR  | GKKDGPDE               | EATNTTGHMPAYQILKTVWPAL           |
| 52_242   | KEVVREIR | EAIGKGT | GAGKRGV | TKRQARR  | GKKDGPDE               | EATNTTGHMPAYQILKTVWPAL           |
| 53_5225  | KEVVREIR | EAIGKGT | GAGKRGV | TKRQARR  | GKKDGPDE               | EATNTTGHMPAYQILKTVWPAL           |
| 54_1635  | KEVVREIR | EAIGKGT | GAGKRGV | TKRQARR  | GKKDGPDE               | EATNTTGHMPAYQILKTVWPAL           |
| 55_5766  | KEVVREIR | EAIGKGT | GAGKRGV | TKRQARR  | GKKDGPDE               | EATNTTGHMPAYQILKTVWPAL           |
| 56_1557  | KEVVREIR | EAIGKGT | GAGKRGV | TKRQARR  | GKKDGPDE               | EATNTTGHMPAYQILKTVWPAL           |
| 57_10137 | KEVVREIR | EAIGKGT | GAGKRGV | TKRQARR  | GKKDGPDE               | EATNTTGHMPAYQILKTVWPAL           |
| 58_10525 | KEVVREIR | EAIGKGT | GAGKRGV | TKRQARR  | GKKDGPDE               | EATNTTGHMPAYQILKTVWPAL           |
| 59_3457  | KEVVREIR | EAIGKGT | GAGKRGV | TKRQARR  | GKKDGPDE               | EATNTTGHMPAYQILKTVWPAL           |
| 60_8244  | KEVVREIR | EAIGKGT | GAGKRGV | TKRQARR  | GKKDGPDE               | EATNTTGHMPAYQILKTVWPAL           |
| 61_7964  | KEVVREIR | EAIGKGT | GAGKRGV | TKRQARR  | GKKDGPDE               | EATNTTGHMPAYQILKTVWPAL           |
| 62_4413  | KEVVREIR | EAIGKGT | GAGKRGV | TKRQARR  | GKKDGPDE               | EATNTTGHMPAYQILKTVWPAL           |
| 63_6958  | KEVVREIR | EAIGKGT | GAGKRGV | TKRQARR  | GKKDGPDE               | EATNTTGHMPAYQILKTVWPAL           |
| 64_5997  | VPQQPF   | IFPGTIR | ENIVYGL | PEDES    | VLRGQHN                | VELAAREADIHEFIISLPQGYETLVGDG     |
| 65_8711  | KEVVREIR | EAIGKGT | GAGKRGV | TKRQARR  | GKKDGPDE               | EATNTTGHMPAYQILKTVWPAL           |
| 66_9925  | KEVVREIR | EAIGKGT | GAGKRGV | TKRQARR  | GKKDGPDE               | EATNTTGHMPAYQILKTVWPAL           |
| 67_10374 | KEVVREIR | EAIGKGT | GAGKRGV | TKRQARR  | GKKDGPDE               | EATNTTGHMPAYQILKTVWPAL           |
| 68_3713  | KEVVREIR | EAIGKGT | GAGKRGV | TKRQARR  | GKKDGPDE               | EATNTTGHMPAYQILKTVWPAL           |
| 69_4511  | KEVVREIR | EAIGKGT | GAGKRGV | TKRQARR  | GKKDGPDE               | EATNTTGHMPAYQILKTVWPAL           |
| 70_6201  | KEVVREIR | EAIGKGT | GAGKRGV | TKRQARR  | GKKDGPDE               | EATNTTGHMPAYQILKTVWPAL           |
| 71_3261  | KEVVREIR | EAIGKGT | GAGKRGV | TKRQARR  | GKKDGPDE               | EATNTTGHMPAYQILKTVWPAL           |
| 72_8516  | KEVVREIR | EAIGKGT | GAGKRGV | TKRQARR  | GKKDGPDE               | EATNTTGHMPAYQILKTVWPAL           |
| 73_9295  | KEVVREIR | EAIGKGT | GAGKRGV | TKRQARR  | GKKDGPDE               | EATNTTGHMPAYQILKTVWPAL           |
| 74_809   | KEVVREIR | EAIGKGT | GAGKRGV | TKRQARR  | GKKDGPDE               | EATNTTGHMPAYQILKTVWPAL           |
| 75_7282  | KEVVREIR | EAIGKGT | GAGKRGV | TKRQARR  | GKKDGPDE               | EATNTTGHMPAYQILKTVWPAL           |
| 76_4910  | KEVVREIR | EAIGKGT | GAGKRGV | TKRQARR  | GKKDGPDE               | EATNTTGHMPAYQILKTVWPAL           |
| 77_10912 | KEVVREIR | EAIGKGT | GAGKRGV | TKRQARR  | GKKDGPDE               | EATNTTGHMPAYQILKTVWPAL           |
| 78_4020  | KEVVREIR | EAIGKGT | GAGKRGV | TKRQARR  | GKKDGPDE               | EATNTTGHMPAYQILKTVWPAL           |
| 79_6703  | KEVVREIR | EAIGKGT | GAGKRGV | TKRQARR  | GKKDGPDE               | EATNTTGHMPAYQILKTVWPAL           |
| 80_8619  | KEVVREIR | EAIGKGT | GAGKRGV | TKRQARR  | GKKDGPDE               | EATNTTGHMPAYQILKTVWPAL           |
| 81_4126  | GKGT     | GAGKRGV | TKRQARR | GKKDGPDE | EATNTTGHMPAYQILKTVWPAL | LDTKHRLYAVAAL                    |
| 82_1363  | KEVVREIR | EAIGKGT | GAGKRGV | TKRQARR  | GKKDGPDE               | EATNTTGHMPAYQILKTVWPAL           |
| 83_5813  | KEVVREIR | EAIGKGT | GAGKRGV | TKRQARR  | GKKDGPDE               | EATNTTGHMPAYQILKTVWPAL           |
| 84_2044  | KEVVREIR | EAIGKGT | GAGKRGV | TKRQARR  | GKKDGPDE               | EATNTTGHMPAYQILKTVWPAL           |
| 85_7617  | KEVVREIR | EAIGKGT | GAGKRGV | TKRQARR  | GKKDGPDE               | EATNTTGHMPAYQILKTVWPAL           |
| 86_1530  | KEVVREIR | EAIGKGT | GAGKRGV | TKRQARR  | GKKDGPDE               | EATNTTGHMPAYQILKTVWPAL           |
| 87_1890  | KEVVREIR | EAIGKGT | GAGKRGV | TKRQARR  | GKKDGPDE               | EATNTTGHMPAYQILKTVWPAL           |
| 88_7049  | KEVVREIR | EAIGKGT | GAGKRGV | TKRQARR  | GKKDGPDE               | EATNTTGHMPAYQILKTVWPAL           |
| 89_440   | KEVVREIR | EAIGKGT | GAGKRGV | TKRQARR  | GKKDGPDE               | EATNTTGHMPAYQILKTVWPAL           |
| 90_4331  | KEVVREIR | EAIGKGT | GAGKRGV | TKRQARR  | GKKDGPDE               | EATNTTGHMPAYQILKTVWPAL           |

|          | 910  | 920   | 930                               | 940  | 950   | 960                                         |
|----------|------|-------|-----------------------------------|------|-------|---------------------------------------------|
| 1_1896   | DTK  | HRL   | YAVA                              | ALFW | CIVA  | AGCSPVFAFVFSNLLQAFWAQGSKLEAGTKWAI           |
| 2_4785   | DTK  | HRL   | YAVA                              | ALFW | CIVA  | AGCSPVFAFVFSNLLQAFWAQGSKLEAGTKWAI           |
| 3_3653   | DTK  | HRL   | YAVA                              | ALFW | CIVA  | AGCSPVFAFVFSNLLQAFWAQGSKLEAGTKWAI           |
| 4_8157   | DTK  | HRL   | YAVA                              | ALFW | CIVA  | AGCSPVFAFVFSNLLQAFWAQGSKLEAGTKWAI           |
| 5_752    | DTK  | HRL   | YAVA                              | ALFW | CIVA  | AGCSPVFAFVFSNLLQAFWAQGSKLEAGTKWAI           |
| 6_8853   | DTK  | HRL   | YAVA                              | ALFW | CIVA  | AGCSPVFAFVFSNLLQAFWAQGSKLEAGTKWAI           |
| 7_4015   | GVF  | LLT   | TVET                              | VNV  | GDII  | QVNVLLMFTVGSATMMMSNIPQIAAAQAKATQMLHLAQMPRGH |
| 8_2020   | DTK  | HRL   | YAVA                              | ALFW | CIVA  | AGCSPVFAFVFSNLLQAFWAQGSKLEAGTKWAI           |
| 9_1829   | DTK  | HRL   | YAVA                              | ALFW | CIVA  | AGCSPVFAFVFSNLLQAFWAQGSKLEAGTKWAI           |
| 10_6452  | DTK  | HRL   | YAVA                              | ALFW | CIVA  | AGCSPVFAFVFSNLLQAFWAQGSKLEAGTKWAI           |
| 11_8627  | DTK  | HRL   | YAVA                              | ALFW | CIVA  | AGCSPVFAFVFSNLLQAFWAQGSKLEAGTKWAI           |
| 12_6118  | DTK  | HRL   | YAVA                              | ALFW | CIVA  | AGCSPVFAFVFSNLLQAFWAQGSKLEAGTKWAI           |
| 13_2688  | DTK  | HRL   | YAVA                              | ALFW | CIVA  | AGCSPVFAFVFSNLLQAFWAQGSKLEAGTKWAI           |
| 14_6406  | DTK  | HRL   | YAVA                              | ALFW | CIVA  | AGCSPVFAFVFSNLLQAFWAQGSKLEAGTKWAI           |
| 15_9419  | DTK  | HRL   | YAVA                              | ALFW | CIVA  | AGCSPVFAFVFSNLLQAFWAQGSKLEAGTKWAI           |
| 16_8507  | DTK  | HRL   | YAVA                              | ALFW | CIVA  | AGCSPVFAFVFSNLLQAFWAQGSKLEAGTKWAI           |
| 17_5884  | DTK  | HRL   | YAVA                              | ALFW | CIVA  | AGCSPVFAFVFSNLLQAFWAQGSKLEAGTKWAI           |
| 18_2670  | DTK  | HRL   | YAVA                              | ALFW | CIVA  | AGCSPVFAFVFSNLLQAFWAQGSKLEAGTKWAI           |
| 19_5172  | DTK  | HRL   | YAVA                              | ALFW | CIVA  | AGCSPVFAFVFSNLLQAFWAQGSKLEAGTKWAI           |
| 20_8057  | DTK  | HRL   | YAVA                              | ALFW | CIVA  | AGCSPVFAFVFSNLLQAFWAQGSKLEAGTKWAI           |
| 21_4920  | ARE  | ISTK  | ALRGM                             | MAY  | VPQQP | FIFPGTIRENIVYGLPEDESVLRGQHNVLEAAREADIEHF    |
| 22_6393  | DTK  | HRL   | YAVA                              | ALFW | CIVA  | AGCSPVFAFVFSNLLQAFWAQGSKLEAGTKWAI           |
| 23_8263  | DTK  | HRL   | YAVA                              | ALFW | CIVA  | AGCSPVFAFVFSNLLQAFWAQGSKLEAGTKWAI           |
| 24_8248  | DTK  | HRL   | YAVA                              | ALFW | CIVA  | AGCSPVFAFVFSNLLQAFWAQGSKLEAGTKWAI           |
| 25_6733  | DTK  | HRL   | YAVA                              | ALFW | CIVA  | AGCSPVFAFVFSNLLQAFWAQGSKLEAGTKWAI           |
| 26_2277  | DTK  | HRL   | YAVA                              | ALFW | CIVA  | AGCSPVFAFVFSNLLQAFWAQGSKLEAGTKWAI           |
| 27_2623  | DTK  | HRL   | YAVA                              | ALFW | CIVA  | AGCSPVFAFVFSNLLQAFWAQGSKLEAGTKWAI           |
| 28_7413  | DTK  | HRL   | YAVA                              | ALFW | CIVA  | AGCSPVFAFVFSNLLQAFWAQGSKLEAGTKWAI           |
| 29_8980  | DTK  | HRL   | YAVA                              | ALFW | CIVA  | AGCSPVFAFVFSNLLQAFWAQGSKLEAGTKWAI           |
| 30_8706  | DTK  | HRL   | YAVA                              | ALFW | CIVA  | AGCSPVFAFVFSNLLQAFWAQGSKLEAGTKWAI           |
| 31_6378  | DTK  | HRL   | YAVA                              | ALFW | CIVA  | AGCSPVFAFVFSNLLQAFWAQGSKLEAGTKWAI           |
| 32_4679  | DTK  | HRL   | YAVA                              | ALFW | CIVA  | AGCSPVFAFVFSNLLQAFWAQGSKLEAGTKWAI           |
| 33_2437  | DTK  | HRL   | YAVA                              | ALFW | CIVA  | AGCSPVFAFVFSNLLQAFWAQGSKLEAGTKWAI           |
| 34_9700  | DTK  | HRL   | YAVA                              | ALFW | CIVA  | AGCSPVFAFVFSNLLQAFWAQGSKLEAGTKWAI           |
| 35_10218 | DTK  | HRL   | YAVA                              | ALFW | CIVA  | AGCSPVFAFVFSNLLQAFWAQGSKLEAGTKWAI           |
| 36_2652  | DTK  | HRL   | YAVA                              | ALFW | CIVA  | AGCSPVFAFVFSNLLQAFWAQGSKLEAGTKWAI           |
| 37_5779  | DTK  | HRL   | YAVA                              | ALFW | CIVA  | AGCSPVFAFVFSNLLQAFWAQGSKLEAGTKWAI           |
| 38_654   | DTK  | HRL   | YAVA                              | ALFW | CIVA  | AGCSPVFAFVFSNLLQAFWAQGSKLEAGTKWAI           |
| 39_4879  | DTK  | HRL   | YAVA                              | ALFW | CIVA  | AGCSPVFAFVFSNLLQAFWAQGSKLEAGTKWAI           |
| 40_8113  | DTK  | HRL   | YAVA                              | ALFW | CIVA  | AGCSPVFAFVFSNLLQAFWAQGSKLEAGTKWAI           |
| 41_1767  | FWC  | IVA   | AGCSPVFAFVFSNLLQAFWAQGSKLEAGTKWAI | VLG  | CVGIL | DFTAVFFTFFFLAG                              |
| 42_8428  | DTK  | HRL   | YAVA                              | ALFW | CIVA  | AGCSPVFAFVFSNLLQAFWAQGSKLEAGTKWAI           |
| 43_9819  | DTK  | HRL   | YAVA                              | ALFW | CIVA  | AGCSPVFAFVFSNLLQAFWAQGSKLEAGTKWAI           |
| 44_5569  | DTK  | HRL   | YAVA                              | ALFW | CIVA  | AGCSPVFAFVFSNLLQAFWAQGSKLEAGTKWAI           |
| 45_4189  | DTK  | HRL   | YAVA                              | ALFW | CIVA  | AGCSPVFAFVFSNLLQAFWAQGSKLEAGTKWAI           |
| 46_1027  | DTK  | HRL   | YAVA                              | ALFW | CIVA  | AGCSPVFAFVFSNLLQAFWAQGSKLEAGTKWAI           |
| 47_5048  | DTK  | HRL   | YAVA                              | ALFW | CIVA  | AGCSPVFAFVFSNLLQAFWAQGSKLEAGTKWAI           |
| 48_10124 | DTK  | HRL   | YAVA                              | ALFW | CIVA  | AGCSPVFAFVFSNLLQAFWAQGSKLEAGTKWAI           |
| 49_7151  | DTK  | HRL   | YAVA                              | ALFW | CIVA  | AGCSPVFAFVFSNLLQAFWAQGSKLEAGTKWAI           |
| 50_3695  | DTK  | HRL   | YAVA                              | ALFW | CIVA  | AGCSPVFAFVFSNLLQAFWAQGSKLEAGTKWAI           |
| 51_364   | DTK  | HRL   | YAVA                              | ALFW | CIVA  | AGCSPVFAFVFSNLLQAFWAQGSKLEAGTKWAI           |
| 52_242   | DTK  | HRL   | YAVA                              | ALFW | CIVA  | AGCSPVFAFVFSNLLQAFWAQGSKLEAGTKWAI           |
| 53_5225  | DTK  | HRL   | YAVA                              | ALFW | CIVA  | AGCSPVFAFVFSNLLQAFWAQGSKLEAGTKWAI           |
| 54_1635  | DTK  | HRL   | YAVA                              | ALFW | CIVA  | AGCSPVFAFVFSNLLQAFWAQGSKLEAGTKWAI           |
| 55_5766  | DTK  | HRL   | YAVA                              | ALFW | CIVA  | AGCSPVFAFVFSNLLQAFWAQGSKLEAGTKWAI           |
| 56_1557  | DTK  | HRL   | YAVA                              | ALFW | CIVA  | AGCSPVFAFVFSNLLQAFWAQGSKLEAGTKWAI           |
| 57_10137 | DTK  | HRL   | YAVA                              | ALFW | CIVA  | AGCSPVFAFVFSNLLQAFWAQGSKLEAGTKWAI           |
| 58_10525 | DTK  | HRL   | YAVA                              | ALFW | CIVA  | AGCSPVFAFVFSNLLQAFWAQGSKLEAGTKWAI           |
| 59_3457  | DTK  | HRL   | YAVA                              | ALFW | CIVA  | AGCSPVFAFVFSNLLQAFWAQGSKLEAGTKWAI           |
| 60_8244  | DTK  | HRL   | YAVA                              | ALFW | CIVA  | AGCSPVFAFVFSNLLQAFWAQGSKLEAGTKWAI           |
| 61_7964  | DTK  | HRL   | YAVA                              | ALFW | CIVA  | AGCSPVFAFVFSNLLQAFWAQGSKLEAGTKWAI           |
| 62_4413  | DTK  | HRL   | YAVA                              | ALFW | CIVA  | AGCSPVFAFVFSNLLQAFWAQGSKLEAGTKWAI           |
| 63_6958  | DTK  | HRL   | YAVA                              | ALFW | CIVA  | AGCSPVFAFVFSNLLQAFWAQGSKLEAGTKWAI           |
| 64_5997  | GVAL | SGGQA | QRLCI                             | ARAL | ARRPK | LLVLDEPT                                    |
| 65_8711  | DTK  | HRL   | YAVA                              | ALFW | CIVA  | AGCSPVFAFVFSNLLQAFWAQGSKLEAGTKWAI           |
| 66_9925  | DTK  | HRL   | YAVA                              | ALFW | CIVA  | AGCSPVFAFVFSNLLQAFWAQGSKLEAGTKWAI           |
| 67_10374 | DTK  | HRL   | YAVA                              | ALFW | CIVA  | AGCSPVFAFVFSNLLQAFWAQGSKLEAGTKWAI           |
| 68_3713  | DTK  | HRL   | YAVA                              | ALFW | CIVA  | AGCSPVFAFVFSNLLQAFWAQGSKLEAGTKWAI           |
| 69_4511  | DTK  | HRL   | YAVA                              | ALFW | CIVA  | AGCSPVFAFVFSNLLQAFWAQGSKLEAGTKWAI           |
| 70_6201  | DTK  | HRL   | YAVA                              | ALFW | CIVA  | AGCSPVFAFVFSNLLQAFWAQGSKLEAGTKWAI           |
| 71_3261  | DTK  | HRL   | YAVA                              | ALFW | CIVA  | AGCSPVFAFVFSNLLQAFWAQGSKLEAGTKWAI           |
| 72_8516  | DTK  | HRL   | YAVA                              | ALFW | CIVA  | AGCSPVFAFVFSNLLQAFWAQGSKLEAGTKWAI           |
| 73_9295  | DTK  | HRL   | YAVA                              | ALFW | CIVA  | AGCSPVFAFVFSNLLQAFWAQGSKLEAGTKWAI           |
| 74_809   | DTK  | HRL   | YAVA                              | ALFW | CIVA  | AGCSPVFAFVFSNLLQAFWAQGSKLEAGTKWAI           |
| 75_7282  | DTK  | HRL   | YAVA                              | ALFW | CIVA  | AGCSPVFAFVFSNLLQAFWAQGSKLEAGTKWAI           |
| 76_4910  | DTK  | HRL   | YAVA                              | ALFW | CIVA  | AGCSPVFAFVFSNLLQAFWAQGSKLEAGTKWAI           |
| 77_10912 | DTK  | HRL   | YAVA                              | ALFW | CIVA  | AGCSPVFAFVFSNLLQAFWAQGSKLEAGTKWAI           |
| 78_4020  | DTK  | HRL   | YAVA                              | ALFW | CIVA  | AGCSPVFAFVFSNLLQAFWAQGSKLEAGTKWAI           |
| 79_6703  | DTK  | HRL   | YAVA                              | ALFW | CIVA  | AGCSPVFAFVFSNLLQAFWAQGSKLEAGTKWAI           |
| 80_8619  | DTK  | HRL   | YAVA                              | ALFW | CIVA  | AGCSPVFAFVFSNLLQAFWAQGSKLEAGTKWAI           |
| 81_4126  | FWC  | IVA   | AGCSPVFAFVFSNLLQAFWAQGSKLEAGTKWAI | VLG  | CVGIL | DFTAVFFTFFFLAG                              |
| 82_1363  | DTK  | HRL   | YAVA                              | ALFW | CIVA  | AGCSPVFAFVFSNLLQAFWAQGSKLEAGTKWAI           |
| 83_5813  | DTK  | HRL   | YAVA                              | ALFW | CIVA  | AGCSPVFAFVFSNLLQAFWAQGSKLEAGTKWAI           |
| 84_2044  | DTK  | HRL   | YAVA                              | ALFW | CIVA  | AGCSPVFAFVFSNLLQAFWAQGSKLEAGTKWAI           |
| 85_7617  | DTK  | HRL   | YAVA                              | ALFW | CIVA  | AGCSPVFAFVFSNLLQAFWAQGSKLEAGTKWAI           |
| 86_1530  | DTK  | HRL   | YAVA                              | ALFW | CIVA  | AGCSPVFAFVFSNLLQAFWAQGSKLEAGTKWAI           |
| 87_1890  | DTK  | HRL   | YAVA                              | ALFW | CIVA  | AGCSPVFAFVFSNLLQAFWAQGSKLEAGTKWAI           |
| 88_7049  | DTK  | HRL   | YAVA                              | ALFW | CIVA  | AGCSPVFAFVFSNLLQAFWAQGSKLEAGTKWAI           |
| 89_440   | DTK  | HRL   | YAVA                              | ALFW | CIVA  | AGCSPVFAFVFSNLLQAFWAQGSKLEAGTKWAI           |
| 90_4331  | DTK  | HRL   | YAVA                              | ALFW | CIVA  | AGCSPVFAFVFSNLLQAFWAQGSKLEAGTKWAI           |

|          | 970              | 980         | 990       | 1000         | 1010         | 1020                |
|----------|------------------|-------------|-----------|--------------|--------------|---------------------|
| 1_1896   | FTAVF            | FTFFLAGAVAQ | EWVDTLKVD | AFSSILCQ     | PRAWHDRSKNSA | ARVCDVLD            |
| 2_4785   | FTAVF            | FTFFLAGAVAQ | EWVDTLKVD | AFSSILCQ     | PRAWHDRSKNSA | ARVCDVLD            |
| 3_3653   | FTAVF            | FTFFLAGAVAQ | EWVDTLKVD | AFSSILCQ     | PRAWHDRSKNSA | ARVCDVLD            |
| 4_8157   | FTAVF            | FTFFLAGAVAQ | EWVDTLKVD | AFSSILCQ     | PRAWHDRSKNSA | ARVCDVLD            |
| 5_752    | FTAVF            | FTFFLAGAVAQ | EWVDTLKVD | AFSSILCQ     | PRAWHDRSKNSA | ARVCDVLD            |
| 6_8853   | FTAVF            | FTFFLAGAVAQ | EWVDTLKVD | AFSSILCQ     | PRAWHDRSKNSA | ARVCDVLD            |
| 7_4015   | SEQQELGKKRILAPFP | PIVFNKLR    | FAYPGRDQ  | QVLRNVSL     | SIPSEGCTA    | IVGGSGCGKSTI        |
| 8_2020   | FTAVF            | FTFFLAGAVAQ | EWVDTLKVD | AFSSILCQ     | PRAWHDRSKNSA | ARVCDVLD            |
| 9_1829   | FTAVF            | FTFFLAGAVAQ | EWVDTLKVD | AFSSILCQ     | PRAWHDRSKNSA | ARVCDVLD            |
| 10_6452  | FTAVF            | FTFFLAGAVAQ | EWVDTLKVD | AFSSILCQ     | PRAWHDRSKNSA | ARVCDVLD            |
| 11_8627  | FTAVF            | FTFFLAGAVAQ | EWVDTLKVD | AFSSILCQ     | PRAWHDRSKNSA | ARVCDVLD            |
| 12_6118  | FTAVF            | FTFFLAGAVAQ | EWVDTLKVD | AFSSILCQ     | PRAWHDRSKNSA | ARVCDVLD            |
| 13_2688  | FTAVF            | FTFFLAGAVAQ | EWVDTLKVD | AFSSILCQ     | PRAWHDRSKNSA | ARVCDVLD            |
| 14_6406  | FTAVF            | FTFFLAGAVAQ | EWVDTLKVD | AFSSILCQ     | PRAWHDRSKNSA | ARVCDVLD            |
| 15_9419  | FTAVF            | FTFFLAGAVAQ | EWVDTLKVD | AFSSILCQ     | PRAWHDRSKNSA | ARVCDVLD            |
| 16_8507  | FTAVF            | FTFFLAGAVAQ | EWVDTLKVD | AFSSILCQ     | PRAWHDRSKNSA | ARVCDVLD            |
| 17_5884  | FTAVF            | FTFFLAGAVAQ | EWVDTLKVD | AFSSILCQ     | PRAWHDRSKNSA | ARVCDVLD            |
| 18_2670  | FTAVF            | FTFFLAGAVAQ | EWVDTLKVD | AFSSILCQ     | PRAWHDRSKNSA | ARVCDVLD            |
| 19_5172  | FTAVF            | FTFFLAGAVAQ | EWVDTLKVD | AFSSILCQ     | PRAWHDRSKNSA | ARVCDVLD            |
| 20_8057  | FTAVF            | FTFFLAGAVAQ | EWVDTLKVD | AFSSILCQ     | PRAWHDRSKNSA | ARVCDVLD            |
| 21_4920  | IISLPQGYETLVGDG  | VALSGGQAQR  | LCIARALAR | RPKLLVLDE    | PTSALDAES    | GQSVMDT             |
| 22_6393  | FTAVF            | FTFFLAGAVAQ | EWVDTLKVD | AFSSILCQ     | PRAWHDRSKNSA | ARVCDVLD            |
| 23_8263  | FTAVF            | FTFFLAGAVAQ | EWVDTLKVD | AFSSILCQ     | PRAWHDRSKNSA | ARVCDVLD            |
| 24_8248  | FTAVF            | FTFFLAGAVAQ | EWVDTLKVD | AFSSILCQ     | PRAWHDRSKNSA | ARVCDVLD            |
| 25_6733  | FTAVF            | FTFFLAGAVAQ | EWVDTLKVD | AFSSILCQ     | PRAWHDRSKNSA | ARVCDVLD            |
| 26_2277  | FTAVF            | FTFFLAGAVAQ | EWVDTLKVD | AFSSILCQ     | PRAWHDRSKNSA | ARVCDVLD            |
| 27_2623  | FTAVF            | FTFFLAGAVAQ | EWVDTLKVD | AFSSILCQ     | PRAWHDRSKNSA | ARVCDVLD            |
| 28_7413  | FTAVF            | FTFFLAGAVAQ | EWVDTLKVD | AFSSILCQ     | PRAWHDRSKNSA | ARVCDVLD            |
| 29_8980  | FTAVF            | FTFFLAGAVAQ | EWVDTLKVD | AFSSILCQ     | PRAWHDRSKNSA | ARVCDVLD            |
| 30_8706  | FTAVF            | FTFFLAGAVAQ | EWVDTLKVD | AFSSILCQ     | PRAWHDRSKNSA | ARVCDVLD            |
| 31_6378  | FTAVF            | FTFFLAGAVAQ | EWVDTLKVD | AFSSILCQ     | PRAWHDRSKNSA | ARVCDVLD            |
| 32_4679  | FTAVF            | FTFFLAGAVAQ | EWVDTLKVD | AFSSILCQ     | PRAWHDRSKNSA | ARVCDVLD            |
| 33_2437  | FTAVF            | FTFFLAGAVAQ | EWVDTLKVD | AFSSILCQ     | PRAWHDRSKNSA | ARVCDVLD            |
| 34_9700  | FTAVF            | FTFFLAGAVAQ | EWVDTLKVD | AFSSILCQ     | PRAWHDRSKNSA | ARVCDVLD            |
| 35_10218 | FTAVF            | FTFFLAGAVAQ | EWVDTLKVD | AFSSILCQ     | PRAWHDRSKNSA | ARVCDVLD            |
| 36_2652  | FTAVF            | FTFFLAGAVAQ | EWVDTLKVD | AFSSILCQ     | PRAWHDRSKNSA | ARVCDVLD            |
| 37_5779  | FTAVF            | FTFFLAGAVAQ | EWVDTLKVD | AFSSILCQ     | PRAWHDRSKNSA | ARVCDVLD            |
| 38_654   | FTAVF            | FTFFLAGAVAQ | EWVDTLKVD | AFSSILCQ     | PRAWHDRSKNSA | ARVCDVLD            |
| 39_4879  | FTAVF            | FTFFLAGAVAQ | EWVDTLKVD | AFSSILCQ     | PRAWHDRSKNSA | ARVCDVLD            |
| 40_8113  | FTAVF            | FTFFLAGAVAQ | EWVDTLKVD | AFSSILCQ     | PRAWHDRSKNSA | ARVCDVLD            |
| 41_1767  | AVAQEW           | VDTLKVD     | AFSSILCQ  | PRAWHDRSKNSA | ARVCDVLD     | RGADEMRTIVAQFTPIALI |
| 42_8428  | FTAVF            | FTFFLAGAVAQ | EWVDTLKVD | AFSSILCQ     | PRAWHDRSKNSA | ARVCDVLD            |
| 43_9819  | FTAVF            | FTFFLAGAVAQ | EWVDTLKVD | AFSSILCQ     | PRAWHDRSKNSA | ARVCDVLD            |
| 44_5569  | FTAVF            | FTFFLAGAVAQ | EWVDTLKVD | AFSSILCQ     | PRAWHDRSKNSA | ARVCDVLD            |
| 45_4189  | FTAVF            | FTFFLAGAVAQ | EWVDTLKVD | AFSSILCQ     | PRAWHDRSKNSA | ARVCDVLD            |
| 46_1027  | FTAVF            | FTFFLAGAVAQ | EWVDTLKVD | AFSSILCQ     | PRAWHDRSKNSA | ARVCDVLD            |
| 47_5048  | FTAVF            | FTFFLAGAVAQ | EWVDTLKVD | AFSSILCQ     | PRAWHDRSKNSA | ARVCDVLD            |
| 48_10124 | FTAVF            | FTFFLAGAVAQ | EWVDTLKVD | AFSSILCQ     | PRAWHDRSKNSA | ARVCDVLD            |
| 49_7151  | FTAVF            | FTFFLAGAVAQ | EWVDTLKVD | AFSSILCQ     | PRAWHDRSKNSA | ARVCDVLD            |
| 50_3695  | FTAVF            | FTFFLAGAVAQ | EWVDTLKVD | AFSSILCQ     | PRAWHDRSKNSA | ARVCDVLD            |
| 51_364   | FTAVF            | FTFFLAGAVAQ | EWVDTLKVD | AFSSILCQ     | PRAWHDRSKNSA | ARVCDVLD            |
| 52_242   | FTAVF            | FTFFLAGAVAQ | EWVDTLKVD | AFSSILCQ     | PRAWHDRSKNSA | ARVCDVLD            |
| 53_5225  | FTAVF            | FTFFLAGAVAQ | EWVDTLKVD | AFSSILCQ     | PRAWHDRSKNSA | ARVCDVLD            |
| 54_1635  | FTAVF            | FTFFLAGAVAQ | EWVDTLKVD | AFSSILCQ     | PRAWHDRSKNSA | ARVCDVLD            |
| 55_5766  | FTAVF            | FTFFLAGAVAQ | EWVDTLKVD | AFSSILCQ     | PRAWHDRSKNSA | ARVCDVLD            |
| 56_1557  | FTAVF            | FTFFLAGAVAQ | EWVDTLKVD | AFSSILCQ     | PRAWHDRSKNSA | ARVCDVLD            |
| 57_10137 | FTAVF            | FTFFLAGAVAQ | EWVDTLKVD | AFSSILCQ     | PRAWHDRSKNSA | ARVCDVLD            |
| 58_10525 | FTAVF            | FTFFLAGAVAQ | EWVDTLKVD | AFSSILCQ     | PRAWHDRSKNSA | ARVCDVLD            |
| 59_3457  | FTAVF            | FTFFLAGAVAQ | EWVDTLKVD | AFSSILCQ     | PRAWHDRSKNSA | ARVCDVLD            |
| 60_8244  | FTAVF            | FTFFLAGAVAQ | EWVDTLKVD | AFSSILCQ     | PRAWHDRSKNSA | ARVCDVLD            |
| 61_7964  | FTAVF            | FTFFLAGAVAQ | EWVDTLKVD | AFSSILCQ     | PRAWHDRSKNSA | ARVCDVLD            |
| 62_4413  | FTAVF            | FTFFLAGAVAQ | EWVDTLKVD | AFSSILCQ     | PRAWHDRSKNSA | ARVCDVLD            |
| 63_6958  | FTAVF            | FTFFLAGAVAQ | EWVDTLKVD | AFSSILCQ     | PRAWHDRSKNSA | ARVCDVLD            |
| 64_5997  | AASPLLRKAGGTLS   | PYPSPQHDP   | YNWEGNFR  | KSEGRSFSY    | VHGAAGTQ     | HRQPAVVVIT          |
| 65_8711  | FTAVF            | FTFFLAGAVAQ | EWVDTLKVD | AFSSILCQ     | PRAWHDRSKNSA | ARVCDVLD            |
| 66_9925  | FTAVF            | FTFFLAGAVAQ | EWVDTLKVD | AFSSILCQ     | PRAWHDRSKNSA | ARVCDVLD            |
| 67_10374 | FTAVF            | FTFFLAGAVAQ | EWVDTLKVD | AFSSILCQ     | PRAWHDRSKNSA | ARVCDVLD            |
| 68_3713  | FTAVF            | FTFFLAGAVAQ | EWVDTLKVD | AFSSILCQ     | PRAWHDRSKNSA | ARVCDVLD            |
| 69_4511  | FTAVF            | FTFFLAGAVAQ | EWVDTLKVD | AFSSILCQ     | PRAWHDRSKNSA | ARVCDVLD            |
| 70_6201  | FTAVF            | FTFFLAGAVAQ | EWVDTLKVD | AFSSILCQ     | PRAWHDRSKNSA | ARVCDVLD            |
| 71_3261  | FTAVF            | FTFFLAGAVAQ | EWVDTLKVD | AFSSILCQ     | PRAWHDRSKNSA | ARVCDVLD            |
| 72_8516  | FTAVF            | FTFFLAGAVAQ | EWVDTLKVD | AFSSILCQ     | PRAWHDRSKNSA | ARVCDVLD            |
| 73_9295  | FTAVF            | FTFFLAGAVAQ | EWVDTLKVD | AFSSILCQ     | PRAWHDRSKNSA | ARVCDVLD            |
| 74_809   | FTAVF            | FTFFLAGAVAQ | EWVDTLKVD | AFSSILCQ     | PRAWHDRSKNSA | ARVCDVLD            |
| 75_7282  | FTAVF            | FTFFLAGAVAQ | EWVDTLKVD | AFSSILCQ     | PRAWHDRSKNSA | ARVCDVLD            |
| 76_4910  | FTAVF            | FTFFLAGAVAQ | EWVDTLKVD | AFSSILCQ     | PRAWHDRSKNSA | ARVCDVLD            |
| 77_10912 | FTAVF            | FTFFLAGAVAQ | EWVDTLKVD | AFSSILCQ     | PRAWHDRSKNSA | ARVCDVLD            |
| 78_4020  | FTAVF            | FTFFLAGAVAQ | EWVDTLKVD | AFSSILCQ     | PRAWHDRSKNSA | ARVCDVLD            |
| 79_6703  | FTAVF            | FTFFLAGAVAQ | EWVDTLKVD | AFSSILCQ     | PRAWHDRSKNSA | ARVCDVLD            |
| 80_8619  | FTAVF            | FTFFLAGAVAQ | EWVDTLKVD | AFSSILCQ     | PRAWHDRSKNSA | ARVCDVLD            |
| 81_4126  | AVAQEW           | VDTLKVD     | AFSSILCQ  | PRAWHDRSKNSA | ARVCDVLD     | RGADEMRTIVAQFTPIALI |
| 82_1363  | FTAVF            | FTFFLAGAVAQ | EWVDTLKVD | AFSSILCQ     | PRAWHDRSKNSA | ARVCDVLD            |
| 83_5813  | FTAVF            | FTFFLAGAVAQ | EWVDTLKVD | AFSSILCQ     | PRAWHDRSKNSA | ARVCDVLD            |
| 84_2044  | FTAVF            | FTFFLAGAVAQ | EWVDTLKVD | AFSSILCQ     | PRAWHDRSKNSA | ARVCDVLD            |
| 85_7617  | FTAVF            | FTFFLAGAVAQ | EWVDTLKVD | AFSSILCQ     | PRAWHDRSKNSA | ARVCDVLD            |
| 86_1530  | FTAVF            | FTFFLAGAVAQ | EWVDTLKVD | AFSSILCQ     | PRAWHDRSKNSA | ARVCDVLD            |
| 87_1890  | FTAVF            | FTFFLAGAVAQ | EWVDTLKVD | AFSSILCQ     | PRAWHDRSKNSA | ARVCDVLD            |
| 88_7049  | FTAVF            | FTFFLAGAVAQ | EWVDTLKVD | AFSSILCQ     | PRAWHDRSKNSA | ARVCDVLD            |
| 89_440   | FTAVF            | FTFFLAGAVAQ | EWVDTLKVD | AFSSILCQ     | PRAWHDRSKNSA | ARVCDVLD            |
| 90_4331  | FTAVF            | FTFFLAGAVAQ | EWVDTLKVD | AFSSILCQ     | PRAWHDRSKNSA | ARVCDVLD            |

|          | 1030                           | 1040                          | 1050             | 1060  | 1070     | 1080 |
|----------|--------------------------------|-------------------------------|------------------|-------|----------|------|
| 1_1896   | TIVAQFTPIALIVVIMVSSAIVWAMVILWQ | TLVALAVFPFVGLCVFFS            | TRTSEKWEALS      |       |          |      |
| 2_4785   | TIVAQFTPIALIVVIMVSSAIVWAMVILWQ | TLVALAVFPFVGLCVFFS            | TRTSEKWEALS      |       |          |      |
| 3_3653   | TIVAQFTPIALIVVIMVSSAIVWAMVILWQ | TLVALAVFPFVGLCVFFS            | TRTSEKWEALS      |       |          |      |
| 4_8157   | TIVAQFTPIALIVVIMVSSAIVWAMVILWQ | TLVALAVFPFVGLCVFFS            | TRTSEKWEALS      |       |          |      |
| 5_752    | TIVAQFTPIALIVVIMVSSAIVWAMVILWQ | TLVALAVFPFVGLCVFFS            | TRTSEKWEALS      |       |          |      |
| 6_8853   | TIVAQFTPIALIVVIMVSSAIVWAMVILWQ | TLVALAVFPFVGLCVFFS            | TRTSEKWEALS      |       |          |      |
| 7_4015   | AALILGLYEPLCDDDRSPVGGASPKAFRKG | NFEVASPVSYPLGPVASSPLPSLVYSLPQ | G                |       |          |      |
| 8_2020   | TIVAQFTPIALIVVIMVSSAIVWAMVILWQ | TLVALAVFPFVGLCVFFS            | TRTSEKWEALS      |       |          |      |
| 9_1829   | TIVAQFTPIALIVVIMVSSAIVWAMVILWQ | TLVALAVFPFVGLCVFFS            | TRTSEKWEALS      |       |          |      |
| 10_6452  | TIVAQFTPIALIVVIMVSSAIVWAMVILWQ | TLVALAVFPFVGLCVFFS            | TRTSEKWEALS      |       |          |      |
| 11_8627  | TIVAQFTPIALIVVIMVSSAIVWAMVILWQ | TLVALAVFPFVGLCVFFS            | TRTSEKWEALS      |       |          |      |
| 12_6118  | TIVAQFTPIALIVVIMVSSAIVWAMVILWQ | TLVALAVFPFVGLCVFFS            | TRTSEKWEALS      |       |          |      |
| 13_2688  | TIVAQFTPIALIVVIMVSSAIVWAMVILWQ | TLVALAVFPFVGLCVFFS            | TRTSEKWEALS      |       |          |      |
| 14_6406  | TIVAQFTPIALIVVIMVSSAIVWAMVILWQ | TLVALAVFPFVGLCVFFS            | TRTSEKWEALS      |       |          |      |
| 15_9419  | TIVAQFTPIALIVVIMVSSAIVWAMVILWQ | TLVALAVFPFVGLCVFFS            | TRTSEKWEALS      |       |          |      |
| 16_8507  | TIVAQFTPIALIVVIMVSSAIVWAMVILWQ | TLVALAVFPFVGLCVFFS            | TRTSEKWEALS      |       |          |      |
| 17_5884  | TIVAQFTPIALIVVIMVSSAIVWAMVILWQ | TLVALAVFPFVGLCVFFS            | TRTSEKWEALS      |       |          |      |
| 18_2670  | TIVAQFTPIALIVVIMVSSAIVWAMVILWQ | TLVALAVFPFVGLCVFFS            | TRTSEKWEALS      |       |          |      |
| 19_5172  | TIVAQFTPIALIVVIMVSSAIVWAMVILWQ | TLVALAVFPFVGLCVFFS            | TRTSEKWEALS      |       |          |      |
| 20_8057  | TIVAQFTPIALIVVIMVSSAIVWAMVILWQ | TLVALAVFPFVGLCVFFS            | TRTSEKWEALS      |       |          |      |
| 21_4920  | LRTLVCRRDGLSTAAASP             | LLRKAGGTLSPYSPQHDPDPYNWEGN    | FFRKSEGRSFSYVHGA |       |          |      |
| 22_6393  | TIVAQFTPIALIVVIMVSSAIVWAMVILWQ | TLVALAVFPFVGLCVFFS            | TRTSEKWEALS      |       |          |      |
| 23_8263  | TIVAQFTPIALIVVIMVSSAIVWAMVILWQ | TLVALAVFPFVGLCVFFS            | TRTSEKWEALS      |       |          |      |
| 24_8248  | TIVAQFTPIALIVVIMVSSAIVWAMVILWQ | TLVALAVFPFVGLCVFFS            | TRTSEKWEALS      |       |          |      |
| 25_6733  | TIVAQFTPIALIVVIMVSSAIVWAMVILWQ | TLVALAVFPFVGLCVFFS            | TRTSEKWEALS      |       |          |      |
| 26_2277  | TIVAQFTPIALIVVIMVSSAIVWAMVILWQ | TLVALAVFPFVGLCVFFS            | TRTSEKWEALS      |       |          |      |
| 27_2623  | TIVAQFTPIALIVVIMVSSAIVWAMVILWQ | TLVALAVFPFVGLCVFFS            | TRTSEKWEALS      |       |          |      |
| 28_7413  | TIVAQFTPIALIVVIMVSSAIVWAMVILWQ | TLVALAVFPFVGLCVFFS            | TRTSEKWEALS      |       |          |      |
| 29_8980  | TIVAQFTPIALIVVIMVSSAIVWAMVILWQ | TLVALAVFPFVGLCVFFS            | TRTSEKWEALS      |       |          |      |
| 30_8706  | TIVAQFTPIALIVVIMVSSAIVWAMVILWQ | TLVALAVFPFVGLCVFFS            | TRTSEKWEALS      |       |          |      |
| 31_6378  | TIVAQFTPIALIVVIMVSSAIVWAMVILWQ | TLVALAVFPFVGLCVFFS            | TRTSEKWEALS      |       |          |      |
| 32_4679  | TIVAQFTPIALIVVIMVSSAIVWAMVILWQ | TLVALAVFPFVGLCVFFS            | TRTSEKWEALS      |       |          |      |
| 33_2437  | TIVAQFTPIALIVVIMVSSAIVWAMVILWQ | TLVALAVFPFVGLCVFFS            | TRTSEKWEALS      |       |          |      |
| 34_9700  | TIVAQFTPIALIVVIMVSSAIVWAMVILWQ | TLVALAVFPFVGLCVFFS            | TRTSEKWEALS      |       |          |      |
| 35_10218 | TIVAQFTPIALIVVIMVSSAIVWAMVILWQ | TLVALAVFPFVGLCVFFS            | TRTSEKWEALS      |       |          |      |
| 36_2652  | TIVAQFTPIALIVVIMVSSAIVWAMVILWQ | TLVALAVFPFVGLCVFFS            | TRTSEKWEALS      |       |          |      |
| 37_5779  | TIVAQFTPIALIVVIMVSSAIVWAMVILWQ | TLVALAVFPFVGLCVFFS            | TRTSEKWEALS      |       |          |      |
| 38_654   | TIVAQFTPIALIVVIMVSSAIVWAMVILWQ | TLVALAVFPFVGLCVFFS            | TRTSEKWEALS      |       |          |      |
| 39_4879  | TIVAQFTPIALIVVIMVSSAIVWAMVILWQ | TLVALAVFPFVGLCVFFS            | TRTSEKWEALS      |       |          |      |
| 40_8113  | TIVAQFTPIALIVVIMVSSAIVWAMVILWQ | TLVALAVFPFVGLCVFFS            | TRTSEKWEALS      |       |          |      |
| 41_1767  | VVIMVSSAIVWAMVILWQ             | TLVALAVFPFVGLCVFFS            | TRTSEKWEALS      | SNESA | EATGGILS |      |
| 42_8428  | TIVAQFTPIALIVVIMVSSAIVWAMVILWQ | TLVALAVFPFVGLCVFFS            | TRTSEKWEALS      |       |          |      |
| 43_9819  | TIVAQFTPIALIVVIMVSSAIVWAMVILWQ | TLVALAVFPFVGLCVFFS            | TRTSEKWEALS      |       |          |      |
| 44_5569  | TIVAQFTPIALIVVIMVSSAIVWAMVILWQ | TLVALAVFPFVGLCVFFS            | TRTSEKWEALS      |       |          |      |
| 45_4189  | TIVAQFTPIALIVVIMVSSAIVWAMVILWQ | TLVALAVFPFVGLCVFFS            | TRTSEKWEALS      |       |          |      |
| 46_1027  | TIVAQFTPIALIVVIMVSSAIVWAMVILWQ | TLVALAVFPFVGLCVFFS            | TRTSEKWEALS      |       |          |      |
| 47_5048  | TIVAQFTPIALIVVIMVSSAIVWAMVILWQ | TLVALAVFPFVGLCVFFS            | TRTSEKWEALS      |       |          |      |
| 48_10124 | TIVAQFTPIALIVVIMVSSAIVWAMVILWQ | TLVALAVFPFVGLCVFFS            | TRTSEKWEALS      |       |          |      |
| 49_7151  | TIVAQFTPIALIVVIMVSSAIVWAMVILWQ | TLVALAVFPFVGLCVFFS            | TRTSEKWEALS      |       |          |      |
| 50_3695  | TIVAQFTPIALIVVIMVSSAIVWAMVILWQ | TLVALAVFPFVGLCVFFS            | TRTSEKWEALS      |       |          |      |
| 51_364   | TIVAQFTPIALIVVIMVSSAIVWAMVILWQ | TLVALAVFPFVGLCVFFS            | TRTSEKWEALS      |       |          |      |
| 52_242   | TIVAQFTPIALIVVIMVSSAIVWAMVILWQ | TLVALAVFPFVGLCVFFS            | TRTSEKWEALS      |       |          |      |
| 53_5225  | TIVAQFTPIALIVVIMVSSAIVWAMVILWQ | TLVALAVFPFVGLCVFFS            | TRTSEKWEALS      |       |          |      |
| 54_1635  | TIVAQFTPIALIVVIMVSSAIVWAMVILWQ | TLVALAVFPFVGLCVFFS            | TRTSEKWEALS      |       |          |      |
| 55_5766  | TIVAQFTPIALIVVIMVSSAIVWAMVILWQ | TLVALAVFPFVGLCVFFS            | TRTSEKWEALS      |       |          |      |
| 56_1557  | TIVAQFTPIALIVVIMVSSAIVWAMVILWQ | TLVALAVFPFVGLCVFFS            | TRTSEKWEALS      |       |          |      |
| 57_10137 | TIVAQFTPIALIVVIMVSSAIVWAMVILWQ | TLVALAVFPFVGLCVFFS            | TRTSEKWEALS      |       |          |      |
| 58_10525 | TIVAQFTPIALIVVIMVSSAIVWAMVILWQ | TLVALAVFPFVGLCVFFS            | TRTSEKWEALS      |       |          |      |
| 59_3457  | TIVAQFTPIALIVVIMVSSAIVWAMVILWQ | TLVALAVFPFVGLCVFFS            | TRTSEKWEALS      |       |          |      |
| 60_8244  | TIVAQFTPIALIVVIMVSSAIVWAMVILWQ | TLVALAVFPFVGLCVFFS            | TRTSEKWEALS      |       |          |      |
| 61_7964  | TIVAQFTPIALIVVIMVSSAIVWAMVILWQ | TLVALAVFPFVGLCVFFS            | TRTSEKWEALS      |       |          |      |
| 62_4413  | TIVAQFTPIALIVVIMVSSAIVWAMVILWQ | TLVALAVFPFVGLCVFFS            | TRTSEKWEALS      |       |          |      |
| 63_6958  | TIVAQFTPIALIVVIMVSSAIVWAMVILWQ | TLVALAVFPFVGLCVFFS            | TRTSEKWEALS      |       |          |      |
| 64_5997  | HSREMMKMADRLLVVIDNGCVAETGTYEYL | MAAGDSRLAELLDDGGYRAPAAKSSG    | VPMENT           |       |          |      |
| 65_8711  | TIVAQFTPIALIVVIMVSSAIVWAMVILWQ | TLVALAVFPFVGLCVFFS            | TRTSEKWEALS      |       |          |      |
| 66_9925  | TIVAQFTPIALIVVIMVSSAIVWAMVILWQ | TLVALAVFPFVGLCVFFS            | TRTSEKWEALS      |       |          |      |
| 67_10374 | TIVAQFTPIALIVVIMVSSAIVWAMVILWQ | TLVALAVFPFVGLCVFFS            | TRTSEKWEALS      |       |          |      |
| 68_3713  | TIVAQFTPIALIVVIMVSSAIVWAMVILWQ | TLVALAVFPFVGLCVFFS            | TRTSEKWEALS      |       |          |      |
| 69_4511  | TIVAQFTPIALIVVIMVSSAIVWAMVILWQ | TLVALAVFPFVGLCVFFS            | TRTSEKWEALS      |       |          |      |
| 70_6201  | TIVAQFTPIALIVVIMVSSAIVWAMVILWQ | TLVALAVFPFVGLCVFFS            | TRTSEKWEALS      |       |          |      |
| 71_3261  | TIVAQFTPIALIVVIMVSSAIVWAMVILWQ | TLVALAVFPFVGLCVFFS            | TRTSEKWEALS      |       |          |      |
| 72_8516  | TIVAQFTPIALIVVIMVSSAIVWAMVILWQ | TLVALAVFPFVGLCVFFS            | TRTSEKWEALS      |       |          |      |
| 73_9295  | TIVAQFTPIALIVVIMVSSAIVWAMVILWQ | TLVALAVFPFVGLCVFFS            | TRTSEKWEALS      |       |          |      |
| 74_809   | TIVAQFTPIALIVVIMVSSAIVWAMVILWQ | TLVALAVFPFVGLCVFFS            | TRTSEKWEALS      |       |          |      |
| 75_7282  | TIVAQFTPIALIVVIMVSSAIVWAMVILWQ | TLVALAVFPFVGLCVFFS            | TRTSEKWEALS      |       |          |      |
| 76_4910  | TIVAQFTPIALIVVIMVSSAIVWAMVILWQ | TLVALAVFPFVGLCVFFS            | TRTSEKWEALS      |       |          |      |
| 77_10912 | TIVAQFTPIALIVVIMVSSAIVWAMVILWQ | TLVALAVFPFVGLCVFFS            | TRTSEKWEALS      |       |          |      |
| 78_4020  | TIVAQFTPIALIVVIMVSSAIVWAMVILWQ | TLVALAVFPFVGLCVFFS            | TRTSEKWEALS      |       |          |      |
| 79_6703  | TIVAQFTPIALIVVIMVSSAIVWAMVILWQ | TLVALAVFPFVGLCVFFS            | TRTSEKWEALS      |       |          |      |
| 80_8619  | TIVAQFTPIALIVVIMVSSAIVWAMVILWQ | TLVALAVFPFVGLCVFFS            | TRTSEKWEALS      |       |          |      |
| 81_4126  | VVIMVSSAIVWAMVILWQ             | TLVALAVFPFVGLCVFFS            | TRTSEKWEALS      | SNESA | EATGGILS |      |
| 82_1363  | TIVAQFTPIALIVVIMVSSAIVWAMVILWQ | TLVALAVFPFVGLCVFFS            | TRTSEKWEALS      |       |          |      |
| 83_5813  | TIVAQFTPIALIVVIMVSSAIVWAMVILWQ | TLVALAVFPFVGLCVFFS            | TRTSEKWEALS      |       |          |      |
| 84_2044  | TIVAQFTPIALIVVIMVSSAIVWAMVILWQ | TLVALAVFPFVGLCVFFS            | TRTSEKWEALS      |       |          |      |
| 85_7617  | TIVAQFTPIALIVVIMVSSAIVWAMVILWQ | TLVALAVFPFVGLCVFFS            | TRTSEKWEALS      |       |          |      |
| 86_1530  | TIVAQFTPIALIVVIMVSSAIVWAMVILWQ | TLVALAVFPFVGLCVFFS            | TRTSEKWEALS      |       |          |      |
| 87_1890  | TIVAQFTPIALIVVIMVSSAIVWAMVILWQ | TLVALAVFPFVGLCVFFS            | TRTSEKWEALS      |       |          |      |
| 88_7049  | TIVAQFTPIALIVVIMVSSAIVWAMVILWQ | TLVALAVFPFVGLCVFFS            | TRTSEKWEALS      |       |          |      |
| 89_440   | TIVAQFTPIALIVVIMVSSAIVWAMVILWQ | TLVALAVFPFVGLCVFFS            | TRTSEKWEALS      |       |          |      |
| 90_4331  | TIVAQFTPIALIVVIMVSSAIVWAMVILWQ | TLVALAVFPFVGLCVFFS            | TRTSEKWEALS      |       |          |      |



|          | 1090             | 1100        | 1110       | 1120       | 1130       | 1140        |
|----------|------------------|-------------|------------|------------|------------|-------------|
| 1_1896   | NESAEATGGILSSVVS | DIRVRAFLL   | LEKFFGDRFE | AAAAERAFT  | IGKKRGLY   | TGIWGGIHC   |
| 2_4785   | NESAEATGGILSSVVS | DIRVRAFLL   | LEKFFGDRFE | AAAAERAFT  | IGKKRGLY   | TGIWGGIHC   |
| 3_3653   | NESAEATGGILSSVVS | DIRVRAFLL   | LEKFFGDRFE | AAAAERAFT  | IGKKRGLY   | TGIWGGIHC   |
| 4_8157   | NESAEATGGILSSVVS | DIRVRAFLL   | LEKFFGDRFE | AAAAERAFT  | IGKKRGLY   | TGIWGGIHC   |
| 5_752    | NESAEATGGILSSVVS | DIRVRAFLL   | LEKFFGDRFE | AAAAERAFT  | IGKKRGLY   | TGIWGGIHC   |
| 6_8853   | NESAEATGGILSSVVS | DIRVRAFLL   | LEKFFGDRFE | AAAAERAFT  | IGKKRGLY   | TGIWGGIHC   |
| 7_4015   | VMRAGSYRRSGELG   | ALTAYAGFDS  | REISTKALRS | MMAYVVPQHP | FLFPGTIQGN | IAYGLPED    |
| 8_2020   | NESAEATGGILSSVVS | DIRVRAFLL   | LEKFFGDRFE | AAAAERAFT  | IGKKRGLY   | TGIWGGIHC   |
| 9_1829   | NESAEATGGILSSVVS | DIRVRAFLL   | LEKFFGDRFE | AAAAERAFT  | IGKKRGLY   | TGIWGGIHC   |
| 10_6452  | NESAEATGGILSSVVS | DIRVRAFLL   | LEKFFGDRFE | AAAAERAFT  | IGKKRGLY   | TGIWGGIHC   |
| 11_8627  | NESAEATGGILSSVVS | DIRVRAFLL   | LEKFFGDRFE | AAAAERAFT  | IGKKRGLY   | TGIWGGIHC   |
| 12_6118  | NESAEATGGILSSVVS | DIRVRAFLL   | LEKFFGDRFE | AAAAERAFT  | IGKKRGLY   | TGIWGGIHC   |
| 13_2688  | NESAEATGGILSSVVS | DIRVRAFLL   | LEKFFGDRFE | AAAAERAFT  | IGKKRGLY   | TGIWGGIHC   |
| 14_6406  | NESAEATGGILSSVVS | DIRVRAFLL   | LEKFFGDRFE | AAAAERAFT  | IGKKRGLY   | TGIWGGIHC   |
| 15_9419  | NESAEATGGILSSVVS | DIRVRAFLL   | LEKFFGDRFE | AAAAERAFT  | IGKKRGLY   | TGIWGGIHC   |
| 16_8507  | NESAEATGGILSSVVS | DIRVRAFLL   | LEKFFGDRFE | AAAAERAFT  | IGKKRGLY   | TGIWGGIHC   |
| 17_5884  | NESAEATGGILSSVVS | DIRVRAFLL   | LEKFFGDRFE | AAAAERAFT  | IGKKRGLY   | TGIWGGIHC   |
| 18_2670  | NESAEATGGILSSVVS | DIRVRAFLL   | LEKFFGDRFE | AAAAERAFT  | IGKKRGLY   | TGIWGGIHC   |
| 19_5172  | NESAEATGGILSSVVS | DIRVRAFLL   | LEKFFGDRFE | AAAAERAFT  | IGKKRGLY   | TGIWGGIHC   |
| 20_8057  | NESAEATGGILSSVVS | DIRVRAFLL   | LEKFFGDRFE | AAAAERAFT  | IGKKRGLY   | TGIWGGIHC   |
| 21_4920  | AAGTQHRQPAVVV    | ITHSREMMKMA | ADRLVVIDN  | GCVAETGT   | YEYLLMAAGD | SRLEALLDGGY |
| 22_6393  | NESAEATGGILSSVVS | DIRVRAFLL   | LEKFFGDRFE | AAAAERAFT  | IGKKRGLY   | TGIWGGIHC   |
| 23_8263  | NESAEATGGILSSVVS | DIRVRAFLL   | LEKFFGDRFE | AAAAERAFT  | IGKKRGLY   | TGIWGGIHC   |
| 24_8248  | NESAEATGGILSSVVS | DIRVRAFLL   | LEKFFGDRFE | AAAAERAFT  | IGKKRGLY   | TGIWGGIHC   |
| 25_6733  | NESAEATGGILSSVVS | DIRVRAFLL   | LEKFFGDRFE | AAAAERAFT  | IGKKRGLY   | TGIWGGIHC   |
| 26_2277  | NESAEATGGILSSVVS | DIRVRAFLL   | LEKFFGDRFE | AAAAERAFT  | IGKKRGLY   | TGIWGGIHC   |
| 27_2623  | NESAEATGGILSSVVS | DIRVRAFLL   | LEKFFGDRFE | AAAAERAFT  | IGKKRGLY   | TGIWGGIHC   |
| 28_7413  | NESAEATGGILSSVVS | DIRVRAFLL   | LEKFFGDRFE | AAAAERAFT  | IGKKRGLY   | TGIWGGIHC   |
| 29_8980  | NESAEATGGILSSVVS | DIRVRAFLL   | LEKFFGDRFE | AAAAERAFT  | IGKKRGLY   | TGIWGGIHC   |
| 30_8706  | NESAEATGGILSSVVS | DIRVRAFLL   | LEKFFGDRFE | AAAAERAFT  | IGKKRGLY   | TGIWGGIHC   |
| 31_6378  | NESAEATGGILSSVVS | DIRVRAFLL   | LEKFFGDRFE | AAAAERAFT  | IGKKRGLY   | TGIWGGIHC   |
| 32_4679  | NESAEATGGILSSVVS | DIRVRAFLL   | LEKFFGDRFE | AAAAERAFT  | IGKKRGLY   | TGIWGGIHC   |
| 33_2437  | NESAEATGGILSSVVS | DIRVRAFLL   | LEKFFGDRFE | AAAAERAFT  | IGKKRGLY   | TGIWGGIHC   |
| 34_9700  | NESAEATGGILSSVVS | DIRVRAFLL   | LEKFFGDRFE | AAAAERAFT  | IGKKRGLY   | TGIWGGIHC   |
| 35_10218 | NESAEATGGILSSVVS | DIRVRAFLL   | LEKFFGDRFE | AAAAERAFT  | IGKKRGLY   | TGIWGGIHC   |
| 36_2652  | NESAEATGGILSSVVS | DIRVRAFLL   | LEKFFGDRFE | AAAAERAFT  | IGKKRGLY   | TGIWGGIHC   |
| 37_5779  | NESAEATGGILSSVVS | DIRVRAFLL   | LEKFFGDRFE | AAAAERAFT  | IGKKRGLY   | TGIWGGIHC   |
| 38_654   | NESAEATGGILSSVVS | DIRVRAFLL   | LEKFFGDRFE | AAAAERAFT  | IGKKRGLY   | TGIWGGIHC   |
| 39_4879  | NESAEATGGILSSVVS | DIRVRAFLL   | LEKFFGDRFE | AAAAERAFT  | IGKKRGLY   | TGIWGGIHC   |
| 40_8113  | NESAEATGGILSSVVS | DIRVRAFLL   | LEKFFGDRFE | AAAAERAFT  | IGKKRGLY   | TGIWGGIHC   |
| 41_1767  | SVVSDIRVVR       | AFLL        | LEKFFGDRFE | AAAAERAFT  | IGKKRGLY   | TGIWGGIHC   |
| 42_8428  | NESAEATGGILSSVVS | DIRVRAFLL   | LEKFFGDRFE | AAAAERAFT  | IGKKRGLY   | TGIWGGIHC   |
| 43_9819  | NESAEATGGILSSVVS | DIRVRAFLL   | LEKFFGDRFE | AAAAERAFT  | IGKKRGLY   | TGIWGGIHC   |
| 44_5569  | NESAEATGGILSSVVS | DIRVRAFLL   | LEKFFGDRFE | AAAAERAFT  | IGKKRGLY   | TGIWGGIHC   |
| 45_4189  | NESAEATGGILSSVVS | DIRVRAFLL   | LEKFFGDRFE | AAAAERAFT  | IGKKRGLY   | TGIWGGIHC   |
| 46_1027  | NESAEATGGILSSVVS | DIRVRAFLL   | LEKFFGDRFE | AAAAERAFT  | IGKKRGLY   | TGIWGGIHC   |
| 47_5048  | NESAEATGGILSSVVS | DIRVRAFLL   | LEKFFGDRFE | AAAAERAFT  | IGKKRGLY   | TGIWGGIHC   |
| 48_10124 | NESAEATGGILSSVVS | DIRVRAFLL   | LEKFFGDRFE | AAAAERAFT  | IGKKRGLY   | TGIWGGIHC   |
| 49_7151  | NESAEATGGILSSVVS | DIRVRAFLL   | LEKFFGDRFE | AAAAERAFT  | IGKKRGLY   | TGIWGGIHC   |
| 50_3695  | NESAEATGGILSSVVS | DIRVRAFLL   | LEKFFGDRFE | AAAAERAFT  | IGKKRGLY   | TGIWGGIHC   |
| 51_364   | NESAEATGGILSSVVS | DIRVRAFLL   | LEKFFGDRFE | AAAAERAFT  | IGKKRGLY   | TGIWGGIHC   |
| 52_242   | NESAEATGGILSSVVS | DIRVRAFLL   | LEKFFGDRFE | AAAAERAFT  | IGKKRGLY   | TGIWGGIHC   |
| 53_5225  | NESAEATGGILSSVVS | DIRVRAFLL   | LEKFFGDRFE | AAAAERAFT  | IGKKRGLY   | TGIWGGIHC   |
| 54_1635  | NESAEATGGILSSVVS | DIRVRAFLL   | LEKFFGDRFE | AAAAERAFT  | IGKKRGLY   | TGIWGGIHC   |
| 55_5766  | NESAEATGGILSSVVS | DIRVRAFLL   | LEKFFGDRFE | AAAAERAFT  | IGKKRGLY   | TGIWGGIHC   |
| 56_1557  | NESAEATGGILSSVVS | DIRVRAFLL   | LEKFFGDRFE | AAAAERAFT  | IGKKRGLY   | TGIWGGIHC   |
| 57_10137 | NESAEATGGILSSVVS | DIRVRAFLL   | LEKFFGDRFE | AAAAERAFT  | IGKKRGLY   | TGIWGGIHC   |
| 58_10525 | NESAEATGGILSSVVS | DIRVRAFLL   | LEKFFGDRFE | AAAAERAFT  | IGKKRGLY   | TGIWGGIHC   |
| 59_3457  | NESAEATGGILSSVVS | DIRVRAFLL   | LEKFFGDRFE | AAAAERAFT  | IGKKRGLY   | TGIWGGIHC   |
| 60_8244  | NESAEATGGILSSVVS | DIRVRAFLL   | LEKFFGDRFE | AAAAERAFT  | IGKKRGLY   | TGIWGGIHC   |
| 61_7964  | NESAEATGGILSSVVS | DIRVRAFLL   | LEKFFGDRFE | AAAAERAFT  | IGKKRGLY   | TGIWGGIHC   |
| 62_4413  | NESAEATGGILSSVVS | DIRVRAFLL   | LEKFFGDRFE | AAAAERAFT  | IGKKRGLY   | TGIWGGIHC   |
| 63_6958  | NESAEATGGILSSVVS | DIRVRAFLL   | LEKFFGDRFE | AAAAERAFT  | IGKKRGLY   | TGIWGGIHC   |
| 64_5997  | TSLEPVVSPRTL     | TRVVSPSP    | EQYRRNNR   | SSPGGIPQ   | RQRP       | GMNMDMFLPQ  |
| 65_8711  | NESAEATGGILSSVVS | DIRVRAFLL   | LEKFFGDRFE | AAAAERAFT  | IGKKRGLY   | TGIWGGIHC   |
| 66_9925  | NESAEATGGILSSVVS | DIRVRAFLL   | LEKFFGDRFE | AAAAERAFT  | IGKKRGLY   | TGIWGGIHC   |
| 67_10374 | NESAEATGGILSSVVS | DIRVRAFLL   | LEKFFGDRFE | AAAAERAFT  | IGKKRGLY   | TGIWGGIHC   |
| 68_3713  | NESAEATGGILSSVVS | DIRVRAFLL   | LEKFFGDRFE | AAAAERAFT  | IGKKRGLY   | TGIWGGIHC   |
| 69_4511  | NESAEATGGILSSVVS | DIRVRAFLL   | LEKFFGDRFE | AAAAERAFT  | IGKKRGLY   | TGIWGGIHC   |
| 70_6201  | NESAEATGGILSSVVS | DIRVRAFLL   | LEKFFGDRFE | AAAAERAFT  | IGKKRGLY   | TGIWGGIHC   |
| 71_3261  | NESAEATGGILSSVVS | DIRVRAFLL   | LEKFFGDRFE | AAAAERAFT  | IGKKRGLY   | TGIWGGIHC   |
| 72_8516  | NESAEATGGILSSVVS | DIRVRAFLL   | LEKFFGDRFE | AAAAERAFT  | IGKKRGLY   | TGIWGGIHC   |
| 73_9295  | NESAEATGGILSSVVS | DIRVRAFLL   | LEKFFGDRFE | AAAAERAFT  | IGKKRGLY   | TGIWGGIHC   |
| 74_809   | NESAEATGGILSSVVS | DIRVRAFLL   | LEKFFGDRFE | AAAAERAFT  | IGKKRGLY   | TGIWGGIHC   |
| 75_7282  | NESAEATGGILSSVVS | DIRVRAFLL   | LEKFFGDRFE | AAAAERAFT  | IGKKRGLY   | TGIWGGIHC   |
| 76_4910  | NESAEATGGILSSVVS | DIRVRAFLL   | LEKFFGDRFE | AAAAERAFT  | IGKKRGLY   | TGIWGGIHC   |
| 77_10912 | NESAEATGGILSSVVS | DIRVRAFLL   | LEKFFGDRFE | AAAAERAFT  | IGKKRGLY   | TGIWGGIHC   |
| 78_4020  | NESAEATGGILSSVVS | DIRVRAFLL   | LEKFFGDRFE | AAAAERAFT  | IGKKRGLY   | TGIWGGIHC   |
| 79_6703  | NESAEATGGILSSVVS | DIRVRAFLL   | LEKFFGDRFE | AAAAERAFT  | IGKKRGLY   | TGIWGGIHC   |
| 80_8619  | NESAEATGGILSSVVS | DIRVRAFLL   | LEKFFGDRFE | AAAAERAFT  | IGKKRGLY   | TGIWGGIHC   |
| 81_4126  | SVVSDIRVVR       | AFLL        | LEKFFGDRFE | AAAAERAFT  | IGKKRGLY   | TGIWGGIHC   |
| 82_1363  | NESAEATGGILSSVVS | DIRVRAFLL   | LEKFFGDRFE | AAAAERAFT  | IGKKRGLY   | TGIWGGIHC   |
| 83_5813  | NESAEATGGILSSVVS | DIRVRAFLL   | LEKFFGDRFE | AAAAERAFT  | IGKKRGLY   | TGIWGGIHC   |
| 84_2044  | NESAEATGGILSSVVS | DIRVRAFLL   | LEKFFGDRFE | AAAAERAFT  | IGKKRGLY   | TGIWGGIHC   |
| 85_7617  | NESAEATGGILSSVVS | DIRVRAFLL   | LEKFFGDRFE | AAAAERAFT  | IGKKRGLY   | TGIWGGIHC   |
| 86_1530  | NESAEATGGILSSVVS | DIRVRAFLL   | LEKFFGDRFE | AAAAERAFT  | IGKKRGLY   | TGIWGGIHC   |
| 87_1890  | NESAEATGGILSSVVS | DIRVRAFLL   | LEKFFGDRFE | AAAAERAFT  | IGKKRGLY   | TGIWGGIHC   |
| 88_7049  | NESAEATGGILSSVVS | DIRVRAFLL   | LEKFFGDRFE | AAAAERAFT  | IGKKRGLY   | TGIWGGIHC   |
| 89_440   | NESAEATGGILSSVVS | DIRVRAFLL   | LEKFFGDRFE | AAAAERAFT  | IGKKRGLY   | TGIWGGIHC   |
| 90_4331  | NESAEATGGILSSVVS | DIRVRAFLL   | LEKFFGDRFE | AAAAERAFT  | IGKKRGLY   | TGIWGGIHC   |

|          | 1150   | 1160   | 1170  | 1180     | 1190     | 1200                               |
|----------|--------|--------|-------|----------|----------|------------------------------------|
| 1_1896   | SISQWL | VVVIFT | FGVFL | LT       | TAESV    | NVGDIIQV                           |
| 2_4785   | SISQWL | VVVIFT | FGVFL | LT       | TAESV    | NVGDIIQV                           |
| 3_3653   | SISQWL | VVVIFT | FGVFL | LT       | TAESV    | NVGDIIQV                           |
| 4_8157   | SISQWL | VVVIFT | FGVFL | LT       | TAESV    | NVGDIIQV                           |
| 5_752    | SISQWL | VVVIFT | FGVFL | LT       | TAESV    | NVGDIIQV                           |
| 6_8853   | SISQWL | VVVIFT | FGVFL | LT       | TAESV    | NVGDIIQV                           |
| 7_4015   | EIVLRG | QHNI   | ELAA  | READI    | HEFI     | ISLPQGYETLV                        |
| 8_2020   | SISQWL | VVVIFT | FGVFL | LT       | TAESV    | NVGDIIQV                           |
| 9_1829   | SISQWL | VVVIFT | FGVFL | LT       | TAESV    | NVGDIIQV                           |
| 10_6452  | SISQWL | VVVIFT | FGVFL | LT       | TAESV    | NVGDIIQV                           |
| 11_8627  | SISQWL | VVVIFT | FGVFL | LT       | TAESV    | NVGDIIQV                           |
| 12_6118  | SISQWL | VVVIFT | FGVFL | LT       | TAESV    | NVGDIIQV                           |
| 13_2688  | SISQWL | VVVIFT | FGVFL | LT       | TAESV    | NVGDIIQV                           |
| 14_6406  | SISQWL | VVVIFT | FGVFL | LT       | TAESV    | NVGDIIQV                           |
| 15_9419  | SISQWL | VVVIFT | FGVFL | LT       | TAESV    | NVGDIIQV                           |
| 16_8507  | SISQWL | VVVIFT | FGVFL | LT       | TAESV    | NVGDIIQV                           |
| 17_5884  | SISQWL | VVVIFT | FGVFL | LT       | TAESV    | NVGDIIQV                           |
| 18_2670  | SISQWL | VVVIFT | FGVFL | LT       | TAESV    | NVGDIIQV                           |
| 19_5172  | SISQWL | VVVIFT | FGVFL | LT       | TAESV    | NVGDIIQV                           |
| 20_8057  | SISQWL | VVVIFT | FGVFL | LT       | TAESV    | NVGDIIQV                           |
| 21_4920  | RAPAAK | SSGVP  | MEKTT | SLEP     | VPVSP    | RTLTRVVSP                          |
| 22_6393  | SISQWL | VVVIFT | FGVFL | LT       | TAESV    | NVGDIIQV                           |
| 23_8263  | SISQWL | VVVIFT | FGVFL | LT       | TAESV    | NVGDIIQV                           |
| 24_8248  | SISQWL | VVVIFT | FGVFL | LT       | TAESV    | NVGDIIQV                           |
| 25_6733  | SISQWL | VVVIFT | FGVFL | LT       | TAESV    | NVGDIIQV                           |
| 26_2277  | SISQWL | VVVIFT | FGVFL | LT       | TAESV    | NVGDIIQV                           |
| 27_2623  | SISQWL | VVVIFT | FGVFL | LT       | TAESV    | NVGDIIQV                           |
| 28_7413  | SISQWL | VVVIFT | FGVFL | LT       | TAESV    | NVGDIIQV                           |
| 29_8980  | SISQWL | VVVIFT | FGVFL | LT       | TAESV    | NVGDIIQV                           |
| 30_8706  | SISQWL | VVVIFT | FGVFL | LT       | TAESV    | NVGDIIQV                           |
| 31_6378  | SISQWL | VVVIFT | FGVFL | LT       | TAESV    | NVGDIIQV                           |
| 32_4679  | SISQWL | VVVIFT | FGVFL | LT       | TAESV    | NVGDIIQV                           |
| 33_2437  | SISQWL | VVVIFT | FGVFL | LT       | TAESV    | NVGDIIQV                           |
| 34_9700  | SISQWL | VVVIFT | FGVFL | LT       | TAESV    | NVGDIIQV                           |
| 35_10218 | SISQWL | VVVIFT | FGVFL | LT       | TAESV    | NVGDIIQV                           |
| 36_2652  | SISQWL | VVVIFT | FGVFL | LT       | TAESV    | NVGDIIQV                           |
| 37_5779  | SISQWL | VVVIFT | FGVFL | LT       | TAESV    | NVGDIIQV                           |
| 38_654   | SISQWL | VVVIFT | FGVFL | LT       | TAESV    | NVGDIIQV                           |
| 39_4879  | SISQWL | VVVIFT | FGVFL | LT       | TAESV    | NVGDIIQV                           |
| 40_8113  | SISQWL | VVVIFT | FGVFL | LT       | TAESV    | NVGDIIQV                           |
| 41_1767  | FGVFL  | LT     | TAESV | NVGDIIQV | VNLLMFTV | GSATMMMSNIPQIAAAQAKAAQAQMLHLAKMPRD |
| 42_8428  | SISQWL | VVVIFT | FGVFL | LT       | TAESV    | NVGDIIQV                           |
| 43_9819  | SISQWL | VVVIFT | FGVFL | LT       | TAESV    | NVGDIIQV                           |
| 44_5569  | SISQWL | VVVIFT | FGVFL | LT       | TAESV    | NVGDIIQV                           |
| 45_4189  | SISQWL | VVVIFT | FGVFL | LT       | TAESV    | NVGDIIQV                           |
| 46_1027  | SISQWL | VVVIFT | FGVFL | LT       | TAESV    | NVGDIIQV                           |
| 47_5048  | SISQWL | VVVIFT | FGVFL | LT       | TAESV    | NVGDIIQV                           |
| 48_10124 | SISQWL | VVVIFT | FGVFL | LT       | TAESV    | NVGDIIQV                           |
| 49_7151  | SISQWL | VVVIFT | FGVFL | LT       | TAESV    | NVGDIIQV                           |
| 50_3695  | SISQWL | VVVIFT | FGVFL | LT       | TAESV    | NVGDIIQV                           |
| 51_364   | SISQWL | VVVIFT | FGVFL | LT       | TAESV    | NVGDIIQV                           |
| 52_242   | SISQWL | VVVIFT | FGVFL | LT       | TAESV    | NVGDIIQV                           |
| 53_5225  | SISQWL | VVVIFT | FGVFL | LT       | TAESV    | NVGDIIQV                           |
| 54_1635  | SISQWL | VVVIFT | FGVFL | LT       | TAESV    | NVGDIIQV                           |
| 55_5766  | SISQWL | VVVIFT | FGVFL | LT       | TAESV    | NVGDIIQV                           |
| 56_1557  | SISQWL | VVVIFT | FGVFL | LT       | TAESV    | NVGDIIQV                           |
| 57_10137 | SISQWL | VVVIFT | FGVFL | LT       | TAESV    | NVGDIIQV                           |
| 58_10525 | SISQWL | VVVIFT | FGVFL | LT       | TAESV    | NVGDIIQV                           |
| 59_3457  | SISQWL | VVVIFT | FGVFL | LT       | TAESV    | NVGDIIQV                           |
| 60_8244  | SISQWL | VVVIFT | FGVFL | LT       | TAESV    | NVGDIIQV                           |
| 61_7964  | SISQWL | VVVIFT | FGVFL | LT       | TAESV    | NVGDIIQV                           |
| 62_4413  | SISQWL | VVVIFT | FGVFL | LT       | TAESV    | NVGDIIQV                           |
| 63_6958  | SISQWL | VVVIFT | FGVFL | LT       | TAESV    | NVGDIIQV                           |
| 64_5997  | RS     |        |       |          |          |                                    |
| 65_8711  | SISQWL | VVVIFT | FGVFL | LT       | TAESV    | NVGDIIQV                           |
| 66_9925  | SISQWL | VVVIFT | FGVFL | LT       | TAESV    | NVGDIIQV                           |
| 67_10374 | SISQWL | VVVIFT | FGVFL | LT       | TAESV    | NVGDIIQV                           |
| 68_3713  | SISQWL | VVVIFT | FGVFL | LT       | TAESV    | NVGDIIQV                           |
| 69_4511  | SISQWL | VVVIFT | FGVFL | LT       | TAESV    | NVGDIIQV                           |
| 70_6201  | SISQWL | VVVIFT | FGVFL | LT       | TAESV    | NVGDIIQV                           |
| 71_3261  | SISQWL | VVVIFT | FGVFL | LT       | TAESV    | NVGDIIQV                           |
| 72_8516  | SISQWL | VVVIFT | FGVFL | LT       | TAESV    | NVGDIIQV                           |
| 73_9295  | SISQWL | VVVIFT | FGVFL | LT       | TAESV    | NVGDIIQV                           |
| 74_809   | SISQWL | VVVIFT | FGVFL | LT       | TAESV    | NVGDIIQV                           |
| 75_7282  | SISQWL | VVVIFT | FGVFL | LT       | TAESV    | NVGDIIQV                           |
| 76_4910  | SISQWL | VVVIFT | FGVFL | LT       | TAESV    | NVGDIIQV                           |
| 77_10912 | SISQWL | VVVIFT | FGVFL | LT       | TAESV    | NVGDIIQV                           |
| 78_4020  | SISQWL | VVVIFT | FGVFL | LT       | TAESV    | NVGDIIQV                           |
| 79_6703  | SISQWL | VVVIFT | FGVFL | LT       | TAESV    | NVGDIIQV                           |
| 80_8619  | SISQWL | VVVIFT | FGVFL | LT       | TAESV    | NVGDIIQV                           |
| 81_4126  | FGVFL  | LT     | TAESV | NVGDIIQV | VNLLMFTV | GSATMMMSNIPQIAAAQAKAAQAQMLHLAKMPRD |
| 82_1363  | SISQWL | VVVIFT | FGVFL | LT       | TAESV    | NVGDIIQV                           |
| 83_5813  | SISQWL | VVVIFT | FGVFL | LT       | TAESV    | NVGDIIQV                           |
| 84_2044  | SISQWL | VVVIFT | FGVFL | LT       | TAESV    | NVGDIIQV                           |
| 85_7617  | SISQWL | VVVIFT | FGVFL | LT       | TAESV    | NVGDIIQV                           |
| 86_1530  | SISQWL | VVVIFT | FGVFL | LT       | TAESV    | NVGDIIQV                           |
| 87_1890  | SISQWL | VVVIFT | FGVFL | LT       | TAESV    | NVGDIIQV                           |
| 88_7049  | SISQWL | VVVIFT | FGVFL | LT       | TAESV    | NVGDIIQV                           |
| 89_440   | SISQWL | VVVIFT | FGVFL | LT       | TAESV    | NVGDIIQV                           |
| 90_4331  | SISQWL | VVVIFT | FGVFL | LT       | TAESV    | NVGDIIQV                           |

|          | 1210            | 1220            | 1230       | 1240           | 1250     | 1260              |
|----------|-----------------|-----------------|------------|----------------|----------|-------------------|
| 1_1896   | AQMLHLAKMPRDHPD | QQELGKKRLLT     | PLPTVFNKLR | FAYPGRDQQVLRNV | SLSP     | SEGCT             |
| 2_4785   | AQMLHLAKMPRDHPD | QQELGKKRLLT     | PLPTVFNKLR | FAYPGRDQQVLRNV | SLSP     | SEGCT             |
| 3_3653   | AQMLHLAKMPRDHPD | QQELGKKRLLT     | PLPTVFNKLR | FAYPGRDQQVLRNV | SLSP     | SEGCT             |
| 4_8157   | AQMLHLAKMPRDHPD | QQELGKKRLLT     | PLPTVFNKLR | FAYPGRDQQVLRNV | SLSP     | SEGCT             |
| 5_752    | AQMLHLAKMPRDHPD | QQELGKKRLLT     | PLPTVFNKLR | FAYPGRDQQVLRNV | SLSP     | SEGCT             |
| 6_8853   | AQMLHLAKMPRDHPD | QQELGKKRLLT     | PLPTVFNKLR | FAYPGRDQQVLRNV | SLSP     | SEGCT             |
| 7_4015   | LLVDEPT         | SALDAESGOSVMDTL | RLTLV      | CCRRDGGLSAAAS  | PLLRRGDG | TLSPYSPQHDPDY     |
| 8_2020   | AQMLHLAKMPRDHPD | QQELGKKRLLT     | PLPTVFNKLR | FAYPGRDQQVLRNV | SLSP     | SEGCT             |
| 9_1829   | AQMLHLAKMPRDHPD | QQELGKKRLLT     | PLPTVFNKLR | FAYPGRDQQVLRNV | SLSP     | SEGCT             |
| 10_6452  | AQMLHLAKMPRDHPD | QQELGKKRLLT     | PLPTVFNKLR | FAYPGRDQQVLRNV | SLSP     | SEGCT             |
| 11_8627  | AQMLHLAKMPRDHPD | QQELGKKRLLT     | PLPTVFNKLR | FAYPGRDQQVLRNV | SLSP     | SEGCT             |
| 12_6118  | AQMLHLAKMPRDHPD | QQELGKKRLLT     | PLPTVFNKLR | FAYPGRDQQVLRNV | SLSP     | SEGCT             |
| 13_2688  | AQMLHLAKMPRDHPD | QQELGKKRLLT     | PLPTVFNKLR | FAYPGRDQQVLRNV | SLSP     | SEGCT             |
| 14_6406  | AQMLHLAKMPRDHPD | QQELGKKRLLT     | PLPTVFNKLR | FAYPGRDQQVLRNV | SLSP     | SEGCT             |
| 15_9419  | AQMLHLAKMPRDHPD | QQELGKKRLLT     | PLPTVFNKLR | FAYPGRDQQVLRNV | SLSP     | SEGCT             |
| 16_8507  | AQMLHLAKMPRDHPD | QQELGKKRLLT     | PLPTVFNKLR | FAYPGRDQQVLRNV | SLSP     | SEGCT             |
| 17_5884  | AQMLHLAKMPRDHPD | QQELGKKRLLT     | PLPTVFNKLR | FAYPGRDQQVLRNV | SLSP     | SEGCT             |
| 18_2670  | AQMLHLAKMPRDHPD | QQELGKKRLLT     | PLPTVFNKLR | FAYPGRDQQVLRNV | SLSP     | SEGCT             |
| 19_5172  | AQMLHLAKMPRDHPD | QQELGKKRLLT     | PLPTVFNKLR | FAYPGRDQQVLRNV | SLSP     | SEGCT             |
| 20_8057  | AQMLHLAKMPRDHPD | QQELGKKRLLT     | PLPTVFNKLR | FAYPGRDQQVLRNV | SLSP     | SEGCT             |
| 21_4920  | MEDMFLP         | QVAVQEDDRS      | .....      | .....          | .....    | .....             |
| 22_6393  | AQMLHLAKMPRDHPD | QQELGKKRLLT     | PLPTVFNKLR | FAYPGRDQQVLRNV | SLSP     | SEGCT             |
| 23_8263  | AQMLHLAKMPRDHPD | QQELGKKRLLT     | PLPTVFNKLR | FAYPGRDQQVLRNV | SLSP     | SEGCT             |
| 24_8248  | AQMLHLAKMPRDHPD | QQELGKKRLLT     | PLPTVFNKLR | FAYPGRDQQVLRNV | SLSP     | SEGCT             |
| 25_6733  | AQMLHLAKMPRDHPD | QQELGKKRLLT     | PLPTVFNKLR | FAYPGRDQQVLRNV | SLSP     | SEGCT             |
| 26_2277  | AQMLHLAKMPRDHPD | QQELGKKRLLT     | PLPTVFNKLR | FAYPGRDQQVLRNV | SLSP     | SEGCT             |
| 27_2623  | AQMLHLAKMPRDHPD | QQELGKKRLLT     | PLPTVFNKLR | FAYPGRDQQVLRNV | SLSP     | SEGCT             |
| 28_7413  | AQMLHLAKMPRDHPD | QQELGKKRLLT     | PLPTVFNKLR | FAYPGRDQQVLRNV | SLSP     | SEGCT             |
| 29_8980  | AQMLHLAKMPRDHPD | QQELGKKRLLT     | PLPTVFNKLR | FAYPGRDQQVLRNV | SLSP     | SEGCT             |
| 30_8706  | AQMLHLAKMPRDHPD | QQELGKKRLLT     | PLPTVFNKLR | FAYPGRDQQVLRNV | SLSP     | SEGCT             |
| 31_6378  | AQMLHLAKMPRDHPD | QQELGKKRLLT     | PLPTVFNKLR | FAYPGRDQQVLRNV | SLSP     | SEGCT             |
| 32_4679  | AQMLHLAKMPRDHPD | QQELGKKRLLT     | PLPTVFNKLR | FAYPGRDQQVLRNV | SLSP     | SEGCT             |
| 33_2437  | AQMLHLAKMPRDHPD | QQELGKKRLLT     | PLPTVFNKLR | FAYPGRDQQVLRNV | SLSP     | SEGCT             |
| 34_9700  | AQMLHLAKMPRDHPD | QQELGKKRLLT     | PLPTVFNKLR | FAYPGRDQQVLRNV | SLSP     | SEGCT             |
| 35_10218 | AQMLHLAKMPRDHPD | QQELGKKRLLT     | PLPTVFNKLR | FAYPGRDQQVLRNV | SLSP     | SEGCT             |
| 36_2652  | AQMLHLAKMPRDHPD | QQELGKKRLLT     | PLPTVFNKLR | FAYPGRDQQVLRNV | SLSP     | SEGCT             |
| 37_5779  | AQMLHLAKMPRDHPD | QQELGKKRLLT     | PLPTVFNKLR | FAYPGRDQQVLRNV | SLSP     | SEGCT             |
| 38_654   | AQMLHLAKMPRDHPD | QQELGKKRLLT     | PLPTVFNKLR | FAYPGRDQQVLRNV | SLSP     | SEGCT             |
| 39_4879  | AQMLHLAKMPRDHPD | QQELGKKRLLT     | PLPTVFNKLR | FAYPGRDQQVLRNV | SLSP     | SEGCT             |
| 40_8113  | AQMLHLAKMPRDHPD | QQELGKKRLLT     | PLPTVFNKLR | FAYPGRDQQVLRNV | SLSP     | SEGCT             |
| 41_1767  | HPDQQEL         | GKKRLLT         | PLPTVFNKLR | FAYPGRDQQVLRNV | SLSP     | SEGCTAIVGGSGCGKST |
| 42_8428  | AQMLHLAKMPRDHPD | QQELGKKRLLT     | PLPTVFNKLR | FAYPGRDQQVLRNV | SLSP     | SEGCT             |
| 43_9819  | AQMLHLAKMPRDHPD | QQELGKKRLLT     | PLPTVFNKLR | FAYPGRDQQVLRNV | SLSP     | SEGCT             |
| 44_5569  | AQMLHLAKMPRDHPD | QQELGKKRLLT     | PLPTVFNKLR | FAYPGRDQQVLRNV | SLSP     | SEGCT             |
| 45_4189  | AQMLHLAKMPRDHPD | QQELGKKRLLT     | PLPTVFNKLR | FAYPGRDQQVLRNV | SLSP     | SEGCT             |
| 46_1027  | AQMLHLAKMPRDHPD | QQELGKKRLLT     | PLPTVFNKLR | FAYPGRDQQVLRNV | SLSP     | SEGCT             |
| 47_5048  | AQMLHLAKMPRDHPD | QQELGKKRLLT     | PLPTVFNKLR | FAYPGRDQQVLRNV | SLSP     | SEGCT             |
| 48_10124 | AQMLHLAKMPRDHPD | QQELGKKRLLT     | PLPTVFNKLR | FAYPGRDQQVLRNV | SLSP     | SEGCT             |
| 49_7151  | AQMLHLAKMPRDHPD | QQELGKKRLLT     | PLPTVFNKLR | FAYPGRDQQVLRNV | SLSP     | SEGCT             |
| 50_3695  | AQMLHLAKMPRDHPD | QQELGKKRLLT     | PLPTVFNKLR | FAYPGRDQQVLRNV | SLSP     | SEGCT             |
| 51_364   | AQMLHLAKMPRDHPD | QQELGKKRLLT     | PLPTVFNKLR | FAYPGRDQQVLRNV | SLSP     | SEGCT             |
| 52_242   | AQMLHLAKMPRDHPD | QQELGKKRLLT     | PLPTVFNKLR | FAYPGRDQQVLRNV | SLSP     | SEGCT             |
| 53_5225  | AQMLHLAKMPRDHPD | QQELGKKRLLT     | PLPTVFNKLR | FAYPGRDQQVLRNV | SLSP     | SEGCT             |
| 54_1635  | AQMLHLAKMPRDHPD | QQELGKKRLLT     | PLPTVFNKLR | FAYPGRDQQVLRNV | SLSP     | SEGCT             |
| 55_5766  | AQMLHLAKMPRDHPD | QQELGKKRLLT     | PLPTVFNKLR | FAYPGRDQQVLRNV | SLSP     | SEGCT             |
| 56_1557  | AQMLHLAKMPRDHPD | QQELGKKRLLT     | PLPTVFNKLR | FAYPGRDQQVLRNV | SLSP     | SEGCT             |
| 57_10137 | AQMLHLAKMPRDHPD | QQELGKKRLLT     | PLPTVFNKLR | FAYPGRDQQVLRNV | SLSP     | SEGCT             |
| 58_10525 | AQMLHLAKMPRDHPD | QQELGKKRLLT     | PLPTVFNKLR | FAYPGRDQQVLRNV | SLSP     | SEGCT             |
| 59_3457  | AQMLHLAKMPRDHPD | QQELGKKRLLT     | PLPTVFNKLR | FAYPGRDQQVLRNV | SLSP     | SEGCT             |
| 60_8244  | AQMLHLAKMPRDHPD | QQELGKKRLLT     | PLPTVFNKLR | FAYPGRDQQVLRNV | SLSP     | SEGCT             |
| 61_7964  | AQMLHLAKMPRDHPD | QQELGKKRLLT     | PLPTVFNKLR | FAYPGRDQQVLRNV | SLSP     | SEGCT             |
| 62_4413  | AQMLHLAKMPRDHPD | QQELGKKRLLT     | PLPTVFNKLR | FAYPGRDQQVLRNV | SLSP     | SEGCT             |
| 63_6958  | AQMLHLAKMPRDHPD | QQELGKKRLLT     | PLPTVFNKLR | FAYPGRDQQVLRNV | SLSP     | SEGCT             |
| 64_5997  | .....           | .....           | .....      | .....          | .....    | .....             |
| 65_8711  | AQMLHLAKMPRDHPD | QQELGKKRLLT     | PLPTVFNKLR | FAYPGRDQQVLRNV | SLSP     | SEGCT             |
| 66_9925  | AQMLHLAKMPRDHPD | QQELGKKRLLT     | PLPTVFNKLR | FAYPGRDQQVLRNV | SLSP     | SEGCT             |
| 67_10374 | AQMLHLAKMPRDHPD | QQELGKKRLLT     | PLPTVFNKLR | FAYPGRDQQVLRNV | SLSP     | SEGCT             |
| 68_3713  | AQMLHLAKMPRDHPD | QQELGKKRLLT     | PLPTVFNKLR | FAYPGRDQQVLRNV | SLSP     | SEGCT             |
| 69_4511  | AQMLHLAKMPRDHPD | QQELGKKRLLT     | PLPTVFNKLR | FAYPGRDQQVLRNV | SLSP     | SEGCT             |
| 70_6201  | AQMLHLAKMPRDHPD | QQELGKKRLLT     | PLPTVFNKLR | FAYPGRDQQVLRNV | SLSP     | SEGCT             |
| 71_3261  | AQMLHLAKMPRDHPD | QQELGKKRLLT     | PLPTVFNKLR | FAYPGRDQQVLRNV | SLSP     | SEGCT             |
| 72_8516  | AQMLHLAKMPRDHPD | QQELGKKRLLT     | PLPTVFNKLR | FAYPGRDQQVLRNV | SLSP     | SEGCT             |
| 73_9295  | AQMLHLAKMPRDHPD | QQELGKKRLLT     | PLPTVFNKLR | FAYPGRDQQVLRNV | SLSP     | SEGCT             |
| 74_809   | AQMLHLAKMPRDHPD | QQELGKKRLLT     | PLPTVFNKLR | FAYPGRDQQVLRNV | SLSP     | SEGCT             |
| 75_7282  | AQMLHLAKMPRDHPD | QQELGKKRLLT     | PLPTVFNKLR | FAYPGRDQQVLRNV | SLSP     | SEGCT             |
| 76_4910  | AQMLHLAKMPRDHPD | QQELGKKRLLT     | PLPTVFNKLR | FAYPGRDQQVLRNV | SLSP     | SEGCT             |
| 77_10912 | AQMLHLAKMPRDHPD | QQELGKKRLLT     | PLPTVFNKLR | FAYPGRDQQVLRNV | SLSP     | SEGCT             |
| 78_4020  | AQMLHLAKMPRDHPD | QQELGKKRLLT     | PLPTVFNKLR | FAYPGRDQQVLRNV | SLSP     | SEGCT             |
| 79_6703  | AQMLHLAKMPRDHPD | QQELGKKRLLT     | PLPTVFNKLR | FAYPGRDQQVLRNV | SLSP     | SEGCT             |
| 80_8619  | AQMLHLAKMPRDHPD | QQELGKKRLLT     | PLPTVFNKLR | FAYPGRDQQVLRNV | SLSP     | SEGCT             |
| 81_4126  | HPDQQEL         | GKKRLLT         | PLPTVFNKLR | FAYPGRDQQVLRNV | SLSP     | SEGCTAIVGGSGCGKST |
| 82_1363  | AQMLHLAKMPRDHPD | QQELGKKRLLT     | PLPTVFNKLR | FAYPGRDQQVLRNV | SLSP     | SEGCT             |
| 83_5813  | AQMLHLAKMPRDHPD | QQELGKKRLLT     | PLPTVFNKLR | FAYPGRDQQVLRNV | SLSP     | SEGCT             |
| 84_2044  | AQMLHLAKMPRDHPD | QQELGKKRLLT     | PLPTVFNKLR | FAYPGRDQQVLRNV | SLSP     | SEGCT             |
| 85_7617  | AQMLHLAKMPRDHPD | QQELGKKRLLT     | PLPTVFNKLR | FAYPGRDQQVLRNV | SLSP     | SEGCT             |
| 86_1530  | AQMLHLAKMPRDHPD | QQELGKKRLLT     | PLPTVFNKLR | FAYPGRDQQVLRNV | SLSP     | SEGCT             |
| 87_1890  | AQMLHLAKMPRDHPD | QQELGKKRLLT     | PLPTVFNKLR | FAYPGRDQQVLRNV | SLSP     | SEGCT             |
| 88_7049  | AQMLHLAKMPRDHPD | QQELGKKRLLT     | PLPTVFNKLR | FAYPGRDQQVLRNV | SLSP     | SEGCT             |
| 89_440   | AQMLHLAKMPRDHPD | QQELGKKRLLT     | PLPTVFNKLR | FAYPGRDQQVLRNV | SLSP     | SEGCT             |
| 90_4331  | AQMLHLAKMPRDHPD | QQELGKKRLLT     | PLPTVFNKLR | FAYPGRDQQVLRNV | SLSP     | SEGCT             |

|          | 1270  | 1280  | 1290  | 1300  | 1310  | 1320  |
|----------|-------|-------|-------|-------|-------|-------|
| 1_1896   | A     | I     | V     | I     | I     | A     |
| 2_4785   | I     | V     | I     | I     | I     | A     |
| 3_3653   | A     | I     | V     | I     | I     | A     |
| 4_8157   | A     | I     | V     | I     | I     | A     |
| 5_752    | A     | I     | V     | I     | I     | A     |
| 6_8853   | A     | I     | V     | I     | I     | A     |
| 7_4015   | N     | W     | E     | G     | N     | F     |
| 8_2020   | A     | I     | V     | I     | I     | A     |
| 9_1829   | A     | I     | V     | I     | I     | A     |
| 10_6452  | A     | I     | V     | I     | I     | A     |
| 11_8627  | A     | I     | V     | I     | I     | A     |
| 12_6118  | A     | I     | V     | I     | I     | A     |
| 13_2688  | A     | I     | V     | I     | I     | A     |
| 14_6406  | A     | I     | V     | I     | I     | A     |
| 15_9419  | A     | I     | V     | I     | I     | A     |
| 16_8507  | A     | I     | V     | I     | I     | A     |
| 17_5884  | A     | I     | V     | I     | I     | A     |
| 18_2670  | A     | I     | V     | I     | I     | A     |
| 19_5172  | A     | I     | V     | I     | I     | A     |
| 20_8057  | A     | I     | V     | I     | I     | A     |
| 21_4920  | ..... | ..... | ..... | ..... | ..... | ..... |
| 22_6393  | A     | I     | V     | I     | I     | A     |
| 23_8263  | A     | I     | V     | I     | I     | A     |
| 24_8248  | A     | I     | V     | I     | I     | A     |
| 25_6733  | A     | I     | V     | I     | I     | A     |
| 26_2277  | A     | I     | V     | I     | I     | A     |
| 27_2623  | A     | I     | V     | I     | I     | A     |
| 28_7413  | A     | I     | V     | I     | I     | A     |
| 29_8980  | A     | I     | V     | I     | I     | A     |
| 30_8706  | A     | I     | V     | I     | I     | A     |
| 31_6378  | A     | I     | V     | I     | I     | A     |
| 32_4679  | A     | I     | V     | I     | I     | A     |
| 33_2437  | A     | I     | V     | I     | I     | A     |
| 34_9700  | A     | I     | V     | I     | I     | A     |
| 35_10218 | A     | I     | V     | I     | I     | A     |
| 36_2652  | A     | I     | V     | I     | I     | A     |
| 37_5779  | A     | I     | V     | I     | I     | A     |
| 38_654   | A     | I     | V     | I     | I     | A     |
| 39_4879  | A     | I     | V     | I     | I     | A     |
| 40_8113  | A     | I     | V     | I     | I     | A     |
| 41_1767  | I     | A     | A     | I     | L     | G     |
| 42_8428  | A     | I     | V     | I     | I     | A     |
| 43_9819  | A     | I     | V     | I     | I     | A     |
| 44_5569  | A     | I     | V     | I     | I     | A     |
| 45_4189  | A     | I     | V     | I     | I     | A     |
| 46_1027  | A     | I     | V     | I     | I     | A     |
| 47_5048  | A     | I     | V     | I     | I     | A     |
| 48_10124 | A     | I     | V     | I     | I     | A     |
| 49_7151  | A     | I     | V     | I     | I     | A     |
| 50_3695  | A     | I     | V     | I     | I     | A     |
| 51_364   | A     | I     | V     | I     | I     | A     |
| 52_242   | A     | I     | V     | I     | I     | A     |
| 53_5225  | A     | I     | V     | I     | I     | A     |
| 54_1635  | A     | I     | V     | I     | I     | A     |
| 55_5766  | A     | I     | V     | I     | I     | A     |
| 56_1557  | A     | I     | V     | I     | I     | A     |
| 57_10137 | A     | I     | V     | I     | I     | A     |
| 58_10525 | A     | I     | V     | I     | I     | A     |
| 59_3457  | A     | I     | V     | I     | I     | A     |
| 60_8244  | A     | I     | V     | I     | I     | A     |
| 61_7964  | A     | I     | V     | I     | I     | A     |
| 62_4413  | A     | I     | V     | I     | I     | A     |
| 63_6958  | A     | I     | V     | I     | I     | A     |
| 64_5997  | ..... | ..... | ..... | ..... | ..... | ..... |
| 65_8711  | A     | I     | V     | I     | I     | A     |
| 66_9925  | A     | I     | V     | I     | I     | A     |
| 67_10374 | A     | I     | V     | I     | I     | A     |
| 68_3713  | A     | I     | V     | I     | I     | A     |
| 69_4511  | A     | I     | V     | I     | I     | A     |
| 70_6201  | A     | I     | V     | I     | I     | A     |
| 71_3261  | A     | I     | V     | I     | I     | A     |
| 72_8516  | A     | I     | V     | I     | I     | A     |
| 73_9295  | A     | I     | V     | I     | I     | A     |
| 74_809   | A     | I     | V     | I     | I     | A     |
| 75_7282  | A     | I     | V     | I     | I     | A     |
| 76_4910  | A     | I     | V     | I     | I     | A     |
| 77_10912 | A     | I     | V     | I     | I     | A     |
| 78_4020  | A     | I     | V     | I     | I     | A     |
| 79_6703  | A     | I     | V     | I     | I     | A     |
| 80_8619  | A     | I     | V     | I     | I     | A     |
| 81_4126  | I     | A     | A     | I     | L     | G     |
| 82_1363  | A     | I     | V     | I     | I     | A     |
| 83_583   | A     | I     | V     | I     | I     | A     |
| 84_2044  | A     | I     | V     | I     | I     | A     |
| 85_7617  | A     | I     | V     | I     | I     | A     |
| 86_1530  | A     | I     | V     | I     | I     | A     |
| 87_1890  | A     | I     | V     | I     | I     | A     |
| 88_7049  | A     | I     | V     | I     | I     | A     |
| 89_440   | A     | I     | V     | I     | I     | A     |
| 90_4331  | A     | I     | V     | I     | I     | A     |

|          | 1330        | 1340        | 1350         | 1360         | 1370        | 1380     |
|----------|-------------|-------------|--------------|--------------|-------------|----------|
| 1_1896   | SSPLPSLVYSP | QGGTRASSHRR | SGELGALTYAG  | FDAREISTKALR | GMMAYVPQQPF | IFFP     |
| 2_4785   | SSPLPSLVYSP | QGGTRASSHRR | SGELGALTYAG  | FDAREISTKALR | GMMAYVPQQPF | IFFP     |
| 3_3653   | SSPLPSLVYSP | QGGTRASSHRR | SGELGALTYAG  | FDAREISTKALR | GMMAYVPQQPF | IFFP     |
| 4_8157   | SSPLPSLVYSP | QGGTRASSHRR | SGELGALTYAG  | FDAREISTKALR | GMMAYVPQQPF | IFFP     |
| 5_752    | SSPLPSLVYSP | QGGTRASSHRR | SGELGALTYAG  | FDAREISTKALR | GMMAYVPQQPF | IFFP     |
| 6_8853   | SSPLPSLVYSP | QGGTRASSHRR | SGELGALTYAG  | FDAREISTKALR | GMMAYVPQQPF | IFFP     |
| 7_4015   | TYEYIMAVGDS | RILAEILLDGA | YRSPAAKSSGV  | PREKTTSL     | EPVVPSPRTL  | TRVVSFSP |
| 8_2020   | SSPLPSLVYSP | QGGTRASSHRR | SGELGALTYAG  | FDAREISTKALR | GMMAYVPQQPF | IFFP     |
| 9_1829   | SSPLPSLVYSP | QGGTRASSHRR | SGELGALTYAG  | FDAREISTKALR | GMMAYVPQQPF | IFFP     |
| 10_6452  | SSPLPSLVYSP | QGGTRASSHRR | SGELGALTYAG  | FDAREISTKALR | GMMAYVPQQPF | IFFP     |
| 11_8627  | SSPLPSLVYSP | QGGTRASSHRR | SGELGALTYAG  | FDAREISTKALR | GMMAYVPQQPF | IFFP     |
| 12_6118  | SSPLPSLVYSP | QGGTRASSHRR | SGELGALTYAG  | FDAREISTKALR | GMMAYVPQQPF | IFFP     |
| 13_2688  | SSPLPSLVYSP | QGGTRASSHRR | SGELGALTYAG  | FDAREISTKALR | GMMAYVPQQPF | IFFP     |
| 14_6406  | SSPLPSLVYSP | QGGTRASSHRR | SGELGALTYAG  | FDAREISTKALR | GMMAYVPQQPF | IFFP     |
| 15_9419  | SSPLPSLVYSP | QGGTRASSHRR | SGELGALTYAG  | FDAREISTKALR | GMMAYVPQQPF | IFFP     |
| 16_8507  | SSPLPSLVYSP | QGGTRASSHRR | SGELGALTYAG  | FDAREISTKALR | GMMAYVPQQPF | IFFP     |
| 17_5884  | SSPLPSLVYSP | QGGTRASSHRR | SGELGALTYAG  | FDAREISTKALR | GMMAYVPQQPF | IFFP     |
| 18_2670  | SSPLPSLVYSP | QGGTRASSHRR | SGELGALTYAG  | FDAREISTKALR | GMMAYVPQQPF | IFFP     |
| 19_5172  | SSPLPSLVYSP | QGGTRASSHRR | SGELGALTYAG  | FDAREISTKALR | GMMAYVPQQPF | IFFP     |
| 20_8057  | SSPLPSLVYSP | QGGTRASSHRR | SGELGALTYAG  | FDAREISTKALR | GMMAYVPQQPF | IFFP     |
| 21_4920  | .....       | .....       | .....        | .....        | .....       | .....    |
| 22_6393  | SSPLPSLVYSP | QGGTRASSHRR | SGELGALTYAG  | FDAREISTKALR | GMMAYVPQQPF | IFFP     |
| 23_8263  | SSPLPSLVYSP | QGGTRASSHRR | SGELGALTYAG  | FDAREISTKALR | GMMAYVPQQPF | IFFP     |
| 24_8248  | SSPLPSLVYSP | QGGTRASSHRR | SGELGALTYAG  | FDAREISTKALR | GMMAYVPQQPF | IFFP     |
| 25_6733  | SSPLPSLVYSP | QGGTRASSHRR | SGELGALTYAG  | FDAREISTKALR | GMMAYVPQQPF | IFFP     |
| 26_2277  | SSPLPSLVYSP | QGGTRASSHRR | SGELGALTYAG  | FDAREISTKALR | GMMAYVPQQPF | IFFP     |
| 27_2623  | SSPLPSLVYSP | QGGTRASSHRR | SGELGALTYAG  | FDAREISTKALR | GMMAYVPQQPF | IFFP     |
| 28_7413  | SSPLPSLVYSP | QGGTRASSHRR | SGELGALTYAG  | FDAREISTKALR | GMMAYVPQQPF | IFFP     |
| 29_8980  | SSPLPSLVYSP | QGGTRASSHRR | SGELGALTYAG  | FDAREISTKALR | GMMAYVPQQPF | IFFP     |
| 30_8706  | SSPLPSLVYSP | QGGTRASSHRR | SGELGALTYAG  | FDAREISTKALR | GMMAYVPQQPF | IFFP     |
| 31_6378  | SSPLPSLVYSP | QGGTRASSHRR | SGELGALTYAG  | FDAREISTKALR | GMMAYVPQQPF | IFFP     |
| 32_4679  | SSPLPSLVYSP | QGGTRASSHRR | SGELGALTYAG  | FDAREISTKALR | GMMAYVPQQPF | IFFP     |
| 33_2437  | SSPLPSLVYSP | QGGTRASSHRR | SGELGALTYAG  | FDAREISTKALR | GMMAYVPQQPF | IFFP     |
| 34_9700  | SSPLPSLVYSP | QGGTRASSHRR | SGELGALTYAG  | FDAREISTKALR | GMMAYVPQQPF | IFFP     |
| 35_10218 | SSPLPSLVYSP | QGGTRASSHRR | SGELGALTYAG  | FDAREISTKALR | GMMAYVPQQPF | IFFP     |
| 36_2652  | SSPLPSLVYSP | QGGTRASSHRR | SGELGALTYAG  | FDAREISTKALR | GMMAYVPQQPF | IFFP     |
| 37_5779  | SSPLPSLVYSP | QGGTRASSHRR | SGELGALTYAG  | FDAREISTKALR | GMMAYVPQQPF | IFFP     |
| 38_654   | SSPLPSLVYSP | QGGTRASSHRR | SGELGALTYAG  | FDAREISTKALR | GMMAYVPQQPF | IFFP     |
| 39_4879  | SSPLPSLVYSP | QGGTRASSHRR | SGELGALTYAG  | FDAREISTKALR | GMMAYVPQQPF | IFFP     |
| 40_8113  | SSPLPSLVYSP | QGGTRASSHRR | SGELGALTYAG  | FDAREISTKALR | GMMAYVPQQPF | IFFP     |
| 41_1767  | QGGTRASSHRR | SGELGALTYAG | FDAREISTKALR | GMMAYVPQQPF  | IFFPGTIREN  | IVYGLP   |
| 42_8428  | SSPLPSLVYSP | QGGTRASSHRR | SGELGALTYAG  | FDAREISTKALR | GMMAYVPQQPF | IFFP     |
| 43_9819  | SSPLPSLVYSP | QGGTRASSHRR | SGELGALTYAG  | FDAREISTKALR | GMMAYVPQQPF | IFFP     |
| 44_5569  | SSPLPSLVYSP | QGGTRASSHRR | SGELGALTYAG  | FDAREISTKALR | GMMAYVPQQPF | IFFP     |
| 45_4189  | SSPLPSLVYSP | QGGTRASSHRR | SGELGALTYAG  | FDAREISTKALR | GMMAYVPQQPF | IFFP     |
| 46_1027  | SSPLPSLVYSP | QGGTRASSHRR | SGELGALTYAG  | FDAREISTKALR | GMMAYVPQQPF | IFFP     |
| 47_5048  | SSPLPSLVYSP | QGGTRASSHRR | SGELGALTYAG  | FDAREISTKALR | GMMAYVPQQPF | IFFP     |
| 48_10124 | SSPLPSLVYSP | QGGTRASSHRR | SGELGALTYAG  | FDAREISTKALR | GMMAYVPQQPF | IFFP     |
| 49_7151  | SSPLPSLVYSP | QGGTRASSHRR | SGELGALTYAG  | FDAREISTKALR | GMMAYVPQQPF | IFFP     |
| 50_3695  | SSPLPSLVYSP | QGGTRASSHRR | SGELGALTYAG  | FDAREISTKALR | GMMAYVPQQPF | IFFP     |
| 51_364   | SSPLPSLVYSP | QGGTRASSHRR | SGELGALTYAG  | FDAREISTKALR | GMMAYVPQQPF | IFFP     |
| 52_242   | SSPLPSLVYSP | QGGTRASSHRR | SGELGALTYAG  | FDAREISTKALR | GMMAYVPQQPF | IFFP     |
| 53_5225  | SSPLPSLVYSP | QGGTRASSHRR | SGELGALTYAG  | FDAREISTKALR | GMMAYVPQQPF | IFFP     |
| 54_1635  | SSPLPSLVYSP | QGGTRASSHRR | SGELGALTYAG  | FDAREISTKALR | GMMAYVPQQPF | IFFP     |
| 55_5766  | SSPLPSLVYSP | QGGTRASSHRR | SGELGALTYAG  | FDAREISTKALR | GMMAYVPQQPF | IFFP     |
| 56_1557  | SSPLPSLVYSP | QGGTRASSHRR | SGELGALTYAG  | FDAREISTKALR | GMMAYVPQQPF | IFFP     |
| 57_10137 | SSPLPSLVYSP | QGGTRASSHRR | SGELGALTYAG  | FDAREISTKALR | GMMAYVPQQPF | IFFP     |
| 58_10525 | SSPLPSLVYSP | QGGTRASSHRR | SGELGALTYAG  | FDAREISTKALR | GMMAYVPQQPF | IFFP     |
| 59_3457  | SSPLPSLVYSP | QGGTRASSHRR | SGELGALTYAG  | FDAREISTKALR | GMMAYVPQQPF | IFFP     |
| 60_8244  | SSPLPSLVYSP | QGGTRASSHRR | SGELGALTYAG  | FDAREISTKALR | GMMAYVPQQPF | IFFP     |
| 61_7964  | SSPLPSLVYSP | QGGTRASSHRR | SGELGALTYAG  | FDAREISTKALR | GMMAYVPQQPF | IFFP     |
| 62_4413  | SSPLPSLVYSP | QGGTRASSHRR | SGELGALTYAG  | FDAREISTKALR | GMMAYVPQQPF | IFFP     |
| 63_6958  | SSPLPSLVYSP | QGGTRASSHRR | SGELGALTYAG  | FDAREISTKALR | GMMAYVPQQPF | IFFP     |
| 64_5997  | .....       | .....       | .....        | .....        | .....       | .....    |
| 65_8711  | SSPLPSLVYSP | QGGTRASSHRR | SGELGALTYAG  | FDAREISTKALR | GMMAYVPQQPF | IFFP     |
| 66_9925  | SSPLPSLVYSP | QGGTRASSHRR | SGELGALTYAG  | FDAREISTKALR | GMMAYVPQQPF | IFFP     |
| 67_10374 | SSPLPSLVYSP | QGGTRASSHRR | SGELGALTYAG  | FDAREISTKALR | GMMAYVPQQPF | IFFP     |
| 68_3713  | SSPLPSLVYSP | QGGTRASSHRR | SGELGALTYAG  | FDAREISTKALR | GMMAYVPQQPF | IFFP     |
| 69_4511  | SSPLPSLVYSP | QGGTRASSHRR | SGELGALTYAG  | FDAREISTKALR | GMMAYVPQQPF | IFFP     |
| 70_6201  | SSPLPSLVYSP | QGGTRASSHRR | SGELGALTYAG  | FDAREISTKALR | GMMAYVPQQPF | IFFP     |
| 71_3261  | SSPLPSLVYSP | QGGTRASSHRR | SGELGALTYAG  | FDAREISTKALR | GMMAYVPQQPF | IFFP     |
| 72_8516  | SSPLPSLVYSP | QGGTRASSHRR | SGELGALTYAG  | FDAREISTKALR | GMMAYVPQQPF | IFFP     |
| 73_9295  | SSPLPSLVYSP | QGGTRASSHRR | SGELGALTYAG  | FDAREISTKALR | GMMAYVPQQPF | IFFP     |
| 74_809   | SSPLPSLVYSP | QGGTRASSHRR | SGELGALTYAG  | FDAREISTKALR | GMMAYVPQQPF | IFFP     |
| 75_7282  | SSPLPSLVYSP | QGGTRASSHRR | SGELGALTYAG  | FDAREISTKALR | GMMAYVPQQPF | IFFP     |
| 76_4910  | SSPLPSLVYSP | QGGTRASSHRR | SGELGALTYAG  | FDAREISTKALR | GMMAYVPQQPF | IFFP     |
| 77_10912 | SSPLPSLVYSP | QGGTRASSHRR | SGELGALTYAG  | FDAREISTKALR | GMMAYVPQQPF | IFFP     |
| 78_4020  | SSPLPSLVYSP | QGGTRASSHRR | SGELGALTYAG  | FDAREISTKALR | GMMAYVPQQPF | IFFP     |
| 79_6703  | SSPLPSLVYSP | QGGTRASSHRR | SGELGALTYAG  | FDAREISTKALR | GMMAYVPQQPF | IFFP     |
| 80_8619  | SSPLPSLVYSP | QGGTRASSHRR | SGELGALTYAG  | FDAREISTKALR | GMMAYVPQQPF | IFFP     |
| 81_4126  | QGGTRASSHRR | SGELGALTYAG | FDAREISTKALR | GMMAYVPQQPF  | IFFPGTIREN  | IVYGLP   |
| 82_1363  | SSPLPSLVYSP | QGGTRASSHRR | SGELGALTYAG  | FDAREISTKALR | GMMAYVPQQPF | IFFP     |
| 83_5813  | SSPLPSLVYSP | QGGTRASSHRR | SGELGALTYAG  | FDAREISTKALR | GMMAYVPQQPF | IFFP     |
| 84_2044  | SSPLPSLVYSP | QGGTRASSHRR | SGELGALTYAG  | FDAREISTKALR | GMMAYVPQQPF | IFFP     |
| 85_7617  | SSPLPSLVYSP | QGGTRASSHRR | SGELGALTYAG  | FDAREISTKALR | GMMAYVPQQPF | IFFP     |
| 86_1530  | SSPLPSLVYSP | QGGTRASSHRR | SGELGALTYAG  | FDAREISTKALR | GMMAYVPQQPF | IFFP     |
| 87_1890  | SSPLPSLVYSP | QGGTRASSHRR | SGELGALTYAG  | FDAREISTKALR | GMMAYVPQQPF | IFFP     |
| 88_7049  | SSPLPSLVYSP | QGGTRASSHRR | SGELGALTYAG  | FDAREISTKALR | GMMAYVPQQPF | IFFP     |
| 89_440   | SSPLPSLVYSP | QGGTRASSHRR | SGELGALTYAG  | FDAREISTKALR | GMMAYVPQQPF | IFFP     |
| 90_4331  | SSPLPSLVYSP | QGGTRASSHRR | SGELGALTYAG  | FDAREISTKALR | GMMAYVPQQPF | IFFP     |



|          | 1390             | 1400               | 1410       | 1420                   | 1430  | 1440    |
|----------|------------------|--------------------|------------|------------------------|-------|---------|
| 1_1896   | GTIRENIVYGLPEDES | SVLRGQHNVELAAREAD  | IHELII     | SLPQGYETLVGDGGVALSGGQA |       |         |
| 2_4785   | GTIRENIVYGLPEDES | SVLRGQHNVELAAREAD  | IHEFII     | SLPQGYETLVGDGGVALSGGQA |       |         |
| 3_3653   | GTIRENIVYGLPEDES | SVLRGQHNVELAAREAD  | IHEFII     | SLPQGYETLVGDGGVALSGGQA |       |         |
| 4_8157   | GTIRENIVYGLPEDES | SVLRGQHNVELAAREAD  | IHEFII     | SLPQGYETLVGDGGVALSGGQA |       |         |
| 5_752    | GTIRENIVYGLPEDES | SVLRGQHNVELAAREAD  | IHEFII     | SLPQGYETLVGDGGVALSGGQA |       |         |
| 6_8853   | GTIRENIVYGLPEDES | SVLRGQHNVELAAREAD  | IHEFII     | SLPQGYETLVGDGGVALSGGQA |       |         |
| 7_4015   | RRNNHSSPGGIPQRQ  | QRPGRNIEDMFLPQVDWQ | GD RR..... |                        |       |         |
| 8_2020   | GTIRENIVYGLPEDES | SVLRGQHNVELAAREAD  | IHEFII     | SLPQGYETLVGDGGVALSGGQA |       |         |
| 9_1829   | GTIRENIVYGLPEDES | SVLRGQHNVELAAREAD  | IHEFII     | SLPQGYETLVGDGGVALSGGQA |       |         |
| 10_6452  | GTIRENIVYGLPEDES | SVLRGQHNVELAAREAD  | IHEFII     | SLPQGYETLVGDGGVALSGGQA |       |         |
| 11_8627  | GTIRENIVYGLPEDES | SVLRGQHNVELAAREAD  | IHELII     | SLPQGYETLVGDGGVALSGGQA |       |         |
| 12_6118  | GTIRENIVYGLPEDES | SVLRGQHNVELAAREAD  | IHEFII     | SLPQGYETLVGDGGVALSGGQA |       |         |
| 13_2688  | GTIRENIVYGLPEDES | SVLRGQHNVELAAREAD  | IHELII     | SLPQGYETLVGDGGVALSGGQA |       |         |
| 14_6406  | GTIRENIVYGLPEDES | SVLRGQHNVELAAREAD  | IHEFII     | SLPQGYETLVGDGGVALSGGQA |       |         |
| 15_9419  | GTIRENIVYGLPEDES | SVLRGQHNVELAAREAD  | IHELII     | SLPQGYETLVGDGGVALSGGQA |       |         |
| 16_8507  | GTIRENIVYGLPEDES | SVLRGQHNVELAAREAD  | IHELII     | SLPQGYETLVGDGGVALSGGQA |       |         |
| 17_5884  | GTIRENIVYGLPEDES | SVLRGQHNVELAAREAD  | IHEFII     | SLPQGYETLVGDGGVALSGGQA |       |         |
| 18_2670  | GTIRENIVYGLPEDES | SVLRGQHNVELAAREAD  | IHEFII     | SLPQGYETLVGDGGVALSGGQA |       |         |
| 19_5172  | GTIRENIVYGLPEDES | SVLRGQHNVELAAREAD  | IHEFII     | SLPQGYETLVGDGGVALSGGQA |       |         |
| 20_8057  | GTIRENIVYGLPEDES | SVLRGQHNVELAAREAD  | IHEFII     | SLPQGYETLVGDGGVALSGGQA |       |         |
| 21_4920  | .....            |                    |            |                        |       |         |
| 22_6393  | GTIRENIVYGLPEDES | SVLRGQHNVELAAREAD  | IHEFII     | SLPQGYETLVGDGGVALSGGQA |       |         |
| 23_8263  | GTIRENIVYGLPEDES | SVLRGQHNVELAAREAD  | IHELII     | SLPQGYETLVGDGGVALSGGQA |       |         |
| 24_8248  | GTIRENIVYGLPEDES | SVLRGQHNVELAAREAD  | IHEFII     | SLPQGYETLVGDGGVALSGGQA |       |         |
| 25_6733  | GTIRENIVYGLPEDES | SVLRGQHNVELAAREAD  | IHELII     | SLPQGYETLVGDGGVALSGGQA |       |         |
| 26_2277  | GTIRENIVYGLPEDES | SVLRGQHNVELAAREAD  | IHELII     | SLPQGYETLVGDGGVALSGGQA |       |         |
| 27_2623  | GTIRENIVYGLPEDES | SVLRGQHNVELAAREAD  | IHEFII     | SLPQGYETLVGDGGVALSGGQA |       |         |
| 28_7413  | GTIRENIVYGLPEDES | SVLRGQHNVELAAREAD  | IHEFII     | SLPQGYETLVGDGGVALSGGQA |       |         |
| 29_8980  | GTIRENIVYGLPEDES | SVLRGQHNVELAAREAD  | IHEFII     | SLPQGYETLVGDGGVALSGGQA |       |         |
| 30_8706  | GTIRENIVYGLPEDES | SVLRGQHNVELAAREAD  | IHEFII     | SLPQGYETLVGDGGVALSGGQA |       |         |
| 31_6378  | GTIRENIVYGLPEDES | SVLRGQHNVELAAREAD  | IHEFII     | SLPQGYETLVGDGGVALSGGQA |       |         |
| 32_4679  | GTIRENIVYGLPEDES | SVLRGQHNVELAAREAD  | IHEFII     | SLPQGYETLVGDGGVALSGGQA |       |         |
| 33_2437  | GTIRENIVYGLPEDES | SVLRGQHNVELAAREAD  | IHEFII     | SLPQGYETLVGDGGVALSGGQA |       |         |
| 34_9700  | GTIRENIVYGLPEDES | SVLRGQHNVELAAREAD  | IHEFII     | SLPQGYETLVGDGGVALSGGQA |       |         |
| 35_10218 | GTIRENIVYGLPEDES | SVLRGQHNVELAAREAD  | IHEFII     | SLPQGYETLVGDGGVALSGGQA |       |         |
| 36_2652  | GTIRENIVYGLPEDES | SVLRGQHNVELAAREAD  | IHEFII     | SLPQGYETLVGDGGVALSGGQA |       |         |
| 37_5779  | GTIRENIVYGLPEDES | SVLRGQHNVELAAREAD  | IHEFII     | SLPQGYETLVGDGGVALSGGQA |       |         |
| 38_654   | GTIRENIVYGLPEDES | SVLRGQHNVELAAREAD  | IHEFII     | SLPQGYETLVGDGGVALSGGQA |       |         |
| 39_4879  | GTIRENIVYGLPEDES | SVLRGQHNVELAAREAD  | IHEFII     | SLPQGYETLVGDGGVALSGGQA |       |         |
| 40_8113  | GTIRENIVYGLPEDES | SVLRGQHNVELAAREAD  | IHEFII     | SLPQGYETLVGDGGVALSGGQA |       |         |
| 41_1767  | EDES             | SVLRGQHNVELAAREAD  | IHEFII     | SLPQGYETLVGDGGVALSGGQA | QRLCI | ARALARR |
| 42_8428  | GTIRENIVYGLPEDES | SVLRGQHNVELAAREAD  | IHEFII     | SLPQGYETLVGDGGVALSGGQA |       |         |
| 43_9819  | GTIRENIVYGLPEDES | SVLRGQHNVELAAREAD  | IHELII     | SLPQGYETLVGDGGVALSGGQA |       |         |
| 44_5569  | GTIRENIVYGLPEDES | SVLRGQHNVELAAREAD  | IHEFII     | SLPQGYETLVGDGGVALSGGQA |       |         |
| 45_4189  | GTIRENIVYGLPEDES | SVLRGQHNVELAAREAD  | IHELII     | SLPQGYETLVGDGGVALSGGQA |       |         |
| 46_1027  | GTIRENIVYGLPEDES | SVLRGQHNVELAAREAD  | IHEFII     | SLPQGYETLVGDGGVALSGGQA |       |         |
| 47_5048  | GTIRENIVYGLPEDES | SVLRGQHNVELAAREAD  | IHEFII     | SLPQGYETLVGDGGVALSGGQA |       |         |
| 48_10124 | GTIRENIVYGLPEDES | SVLRGQHNVELAAREAD  | IHEFII     | SLPQGYETLVGDGGVALSGGQA |       |         |
| 49_7151  | GTIRENIVYGLPEDES | SVLRGQHNVELAAREAD  | IHEFII     | SLPQGYETLVGDGGVALSGGQA |       |         |
| 50_3695  | GTIRENIVYGLPEDES | SVLRGQHNVELAAREAD  | IHEFII     | SLPQGYETLVGDGGVALSGGQA |       |         |
| 51_364   | GTIRENIVYGLPEDES | SVLRGQHNVELAAREAD  | IHEFII     | SLPQGYETLVGDGGVALSGGQA |       |         |
| 52_242   | GTIRENIVYGLPEDES | SVLRGQHNVELAAREAD  | IHEFII     | SLPQGYETLVGDGGVALSGGQA |       |         |
| 53_5225  | GTIRENIVYGLPEDES | SVLRGQHNVELAAREAD  | IHEFII     | SLPQGYETLVGDGGVALSGGQA |       |         |
| 54_1635  | GTIRENIVYGLPEDES | SVLRGQHNVELAAREAD  | IHEFII     | SLPQGYETLVGDGGVALSGGQA |       |         |
| 55_5766  | GTIRENIVYGLPEDES | SVLRGQHNVELAAREAD  | IHEFII     | SLPQGYETLVGDGGVALSGGQA |       |         |
| 56_1557  | GTIRENIVYGLPEDES | SVLRGQHNVELAAREAD  | IHEFII     | SLPQGYETLVGDGGVALSGGQA |       |         |
| 57_10137 | GTIRENIVYGLPEDES | SVLRGQHNVELAAREAD  | IHELII     | SLPQGYETLVGDGGVALSGGQA |       |         |
| 58_10525 | GTIRENIVYGLPEDES | SVLRGQHNVELAAREAD  | IHELII     | SLPQGYETLVGDGGVALSGGQA |       |         |
| 59_3457  | GTIRENIVYGLPEDES | SVLRGQHNVELAAREAD  | IHEFII     | SLPQGYETLVGDGGVALSGGQA |       |         |
| 60_8244  | GTIRENIVYGLPEDES | SVLRGQHNVELAAREAD  | IHEFII     | SLPQGYETLVGDGGVALSGGQA |       |         |
| 61_7964  | GTIRENIVYGLPEDES | SVLRGQHNVELAAREAD  | IHEFII     | SLPQGYETLVGDGGVALSGGQA |       |         |
| 62_4413  | GTIRENIVYGLPEDES | SVLRGQHNVELAAREAD  | IHEFII     | SLPQGYETLVGDGGVALSGGQA |       |         |
| 63_6958  | GTIRENIVYGLPEDES | SVLRGQHNVELAAREAD  | IHEFII     | SLPQGYETLVGDGGVALSGGQA |       |         |
| 64_5997  | .....            |                    |            |                        |       |         |
| 65_8711  | GTIRENIVYGLPEDES | SVLRGQHNVELAAREAD  | IHEFII     | SLPQGYETLVGDGGVALSGGQA |       |         |
| 66_9925  | GTIRENIVYGLPEDES | SVLRGQHNVELAAREAD  | IHEFII     | SLPQGYETLVGDGGVALSGGQA |       |         |
| 67_10374 | GTIRENIVYGLPEDES | SVLRGQHNVELAAREAD  | IHEFII     | SLPQGYETLVGDGGVALSGGQA |       |         |
| 68_3713  | GTIRENIVYGLPEDES | SVLRGQHNVELAAREAD  | IHEFII     | SLPQGYETLVGDGGVALSGGQA |       |         |
| 69_4511  | GTIRENIVYGLPEDES | SVLRGQHNVELAAREAD  | IHEFII     | SLPQGYETLVGDGGVALSGGQA |       |         |
| 70_6201  | GTIRENIVYGLPEDES | SVLRGQHNVELAAREAD  | IHEFII     | SLPQGYETLVGDGGVALSGGQA |       |         |
| 71_3261  | GTIRENIVYGLPEDES | SVLRGQHNVELAAREAD  | IHEFII     | SLPQGYETLVGDGGVALSGGQA |       |         |
| 72_8516  | GTIRENIVYGLPEDES | SVLRGQHNVELAAREAD  | IHEFII     | SLPQGYETLVGDGGVALSGGQA |       |         |
| 73_9295  | GTIRENIVYGLPEDES | SVLRGQHNVELAAREAD  | IHEFII     | SLPQGYETLVGDGGVALSGGQA |       |         |
| 74_809   | GTIRENIVYGLPEDES | SVLRGQHNVELAAREAD  | IHEFII     | SLPQGYETLVGDGGVALSGGQA |       |         |
| 75_7282  | GTIRENIVYGLPEDES | SVLRGQHNVELAAREAD  | IHEFII     | SLPQGYETLVGDGGVALSGGQA |       |         |
| 76_4910  | GTIRENIVYGLPEDES | SVLRGQHNVELAAREAD  | IHEFII     | SLPQGYETLVGDGGVALSGGQA |       |         |
| 77_10912 | GTIRENIVYGLPEDES | SVLRGQHNVELAAREAD  | IHEFII     | SLPQGYETLVGDGGVALSGGQA |       |         |
| 78_4020  | GTIRENIVYGLPEDES | SVLRGQHNVELAAREAD  | IHEFII     | SLPQGYETLVGDGGVALSGGQA |       |         |
| 79_6703  | GTIRENIVYGLPEDES | SVLRGQHNVELAAREAD  | IHEFII     | SLPQGYETLVGDGGVALSGGQA |       |         |
| 80_8619  | GTIRENIVYGLPEDES | SVLRGQHNVELAAREAD  | IHEFII     | SLPQGYETLVGDGGVALSGGQA |       |         |
| 81_4126  | EDES             | SVLRGQHNVELAAREAD  | IHEFII     | SLPQGYETLVGDGGVALSGGQA | QRLCI | ARALARR |
| 82_1363  | GTIRENIVYGLPEDES | SVLRGQHNVELAAREAD  | IHEFII     | SLPQGYETLVGDGGVALSGGQA |       |         |
| 83_5813  | GTIRENIVYGLPEDES | SVLRGQHNVELAAREAD  | IHEFII     | SLPQGYETLVGDGGVALSGGQA |       |         |
| 84_2044  | GTIRENIVYGLPEDES | SVLRGQHNVELAAREAD  | IHEFII     | SLPQGYETLVGDGGVALSGGQA |       |         |
| 85_7617  | GTIRENIVYGLPEDES | SVLRGQHNVELAAREAD  | IHELII     | SLPQGYETLVGDGGVALSGGQA |       |         |
| 86_1530  | GTIRENIVYGLPEDES | SVLRGQHNVELAAREAD  | IHEFII     | SLPQGYETLVGDGGVALSGGQA |       |         |
| 87_1890  | GTIRENIVYGLPEDES | SVLRGQHNVELAAREAD  | IHEFII     | SLPQGYETLVGDGGVALSGGQA |       |         |
| 88_7049  | GTIRENIVYGLPEDES | SVLRGQHNVELAAREAD  | IHEFII     | SLPQGYETLVGDGGVALSGGQA |       |         |
| 89_440   | GTIRENIVYGLPEDES | SVLRGQHNVELAAREAD  | IHEFII     | SLPQGYETLVGDGGVALSGGQA |       |         |
| 90_4331  | GTIRENIVYGLPEDES | SVLRGQHNVELAAREAD  | IHEFII     | SLPQGYETLVGDGGVALSGGQA |       |         |

|          | 1450                   | 1460                                   | 1470       | 1480                      | 1490 | 1500 |
|----------|------------------------|----------------------------------------|------------|---------------------------|------|------|
| 1_1896   | QRLCIARALARRPKLLVLDEPT | SALDAESGQSVMDTLR                       | TLVLCRRDGD | LSTAAASPLLRKA             |      |      |
| 2_4785   | QRLCIARALARRPKLLVLDEPT | SALDAESGQSVMDTLR                       | TLVLCRRDGD | LSTAAASPLLRKA             |      |      |
| 3_3653   | QRLCIARALARRPKLLVLDEPT | SALDAESGQSVMDTLR                       | TLVLCRRDGD | LSTAAASPLLRKA             |      |      |
| 4_8157   | QRLCIARALARRPKLLVLDEPT | SALDAESGQSVMDTLR                       | TLVLCRRDGD | LSTAAASPLLRKA             |      |      |
| 5_752    | QRLCIARALARRPKLLVLDEPT | SALDAESGQSVMDTLR                       | TLVLCRRDGD | LSTAAASPLLRKA             |      |      |
| 6_8853   | QRLCIARALARRPKLLVLDEPT | SALDAESGQSVMDTLR                       | TLVLCRRDGD | LSTAAASPLLRKA             |      |      |
| 7_4015   | .....                  |                                        |            |                           |      |      |
| 8_2020   | QRLCIARALARRPKLLVLDEPT | SALDAESGQSVMDTLR                       | TLVLCRRDGD | LSTAAASPLLRKA             |      |      |
| 9_1829   | QRLCIARALARRPKLLVLDEPT | SALDAESGQSVMDTLR                       | TLVLCRRDGD | LSTAAASPLLRKA             |      |      |
| 10_6452  | QRLCIARALARRPKLLVLDEPT | SALDAESGQSVMDTLR                       | TLVLCRRDGD | LSTAAASPLLRKA             |      |      |
| 11_8627  | QRLCIARALARRPKLLVLDEPT | SALDAESGQSVMDTLR                       | TLVLCRRDGD | LSTAAASPLLRKA             |      |      |
| 12_6118  | QRLCIARALARRPKLLVLDEPT | SALDAESGQSVMDTLR                       | TLVLCRRDGD | LSTAAASPLLRKA             |      |      |
| 13_2688  | QRLCIARALARRPKLLVLDEPT | SALDAESGQSVMDTLR                       | TLVLCRRDGD | LSTAAASPLLRKA             |      |      |
| 14_6406  | QRLCIARALARRPKLLVLDEPT | SALDAESGQSVMDTLR                       | TLVLCRRDGD | LSTAAASPLLRKA             |      |      |
| 15_9419  | QRLCIARALARRPKLLVLDEPT | SALDAESGQSVMDTLR                       | TLVLCRRDGD | LSTAAASPLLRKA             |      |      |
| 16_8507  | QRLCIARALARRPKLLVLDEPT | SALDAESGQSVMDTLR                       | TLVLCRRDGD | LSTAAASPLLRKA             |      |      |
| 17_5884  | QRLCIARALARRPKLLVLDEPT | SALDAESGQSVMDTLR                       | TLVLCRRDGD | LSTAAASPLLRKA             |      |      |
| 18_2670  | QRLCIARALARRPKLLVLDEPT | SALDAESGQSVMDTLR                       | TLVLCRRDGD | LSTAAASPLLRKA             |      |      |
| 19_5172  | QRLCIARALARRPKLLVLDEPT | SALDAESGQSVMDTLR                       | TLVLCRRDGD | LSTAAASPLLRKA             |      |      |
| 20_8057  | QRLCIARALARRPKLLVLDEPT | SALDAESGQSVMDTLR                       | TLVLCRRDGD | LSTAAASPLLRKA             |      |      |
| 21_4920  | .....                  |                                        |            |                           |      |      |
| 22_6393  | QRLCIARALARRPKLLVLDEPT | SALDAESGQSVMDTLR                       | TLVLCRRDGD | LSTAAASPLLRKA             |      |      |
| 23_8263  | QRLCIARALARRPKLLVLDEPT | SALDAESGQSVMDTLR                       | TLVLCRRDGD | LSTAAASPLLRKA             |      |      |
| 24_8248  | QRLCIARALARRPKLLVLDEPT | SALDAESGQSVMDTLR                       | TLVLCRRDGD | LSTAAASPLLRKA             |      |      |
| 25_6733  | QRLCIARALARRPKLLVLDEPT | SALDAESGQSVMDTLR                       | TLVLCRRDGD | LSTAAASPLLRKA             |      |      |
| 26_2277  | QRLCIARALARRPKLLVLDEPT | SALDAESGQSVMDTLR                       | TLVLCRRDGD | LSTAAASPLLRKA             |      |      |
| 27_2623  | QRLCIARALARRPKLLVLDEPT | SALDAESGQSVMDTLR                       | TLVLCRRDGD | LSTAAASPLLRKA             |      |      |
| 28_7413  | QRLCIARALARRPKLLVLDEPT | SALDAESGQSVMDTLR                       | TLVLCRRDGD | LSTAAASPLLRKA             |      |      |
| 29_8980  | QRLCIARALARRPKLLVLDEPT | SALDAESGQSVMDTLR                       | TLVLCRRDGD | LSTAAASPLLRKA             |      |      |
| 30_8706  | QRLCIARALARRPKLLVLDEPT | SALDAESGQSVMDTLR                       | TLVLCRRDGD | LSTAAASPLLRKA             |      |      |
| 31_6378  | QRLCIARALARRPKLLVLDEPT | SALDAESGQSVMDTLR                       | TLVLCRRDGD | LSTAAASPLLRKA             |      |      |
| 32_4679  | QRLCIARALARRPKLLVLDEPT | SALDAESGQSVMDTLR                       | TLVLCRRDGD | LSTAAASPLLRKA             |      |      |
| 33_2437  | QRLCIARALARRPKLLVLDEPT | SALDAESGQSVMDTLR                       | TLVLCRRDGD | LSTAAASPLLRKA             |      |      |
| 34_9700  | QRLCIARALARRPKLLVLDEPT | SALDAESGQSVMDTLR                       | TLVLCRRDGD | LSTAAASPLLRKA             |      |      |
| 35_10218 | QRLCIARALARRPKLLVLDEPT | SALDAESGQSVMDTLR                       | TLVLCRRDGD | LSTAAASPLLRKA             |      |      |
| 36_2652  | QRLCIARALARRPKLLVLDEPT | SALDAESGQSVMDTLR                       | TLVLCRRDGD | LSTAAASPLLRKA             |      |      |
| 37_5779  | QRLCIARALARRPKLLVLDEPT | SALDAESGQSVMDTLR                       | TLVLCRRDGD | LSTAAASPLLRKA             |      |      |
| 38_654   | QRLCIARALARRPKLLVLDEPT | SALDAESGQSVMDTLR                       | TLVLCRRDGD | LSTAAASPLLRKA             |      |      |
| 39_4879  | QRLCIARALARRPKLLVLDEPT | SALDAESGQSVMDTLR                       | TLVLCRRDGD | LSTAAASPLLRKA             |      |      |
| 40_8113  | QRLCIARALARRPKLLVLDEPT | SALDAESGQSVMDTLR                       | TLVLCRRDGD | LSTAAASPLLRKA             |      |      |
| 41_1767  | PKLLVLDEPT             | SALDAESGQSVMDTLR                       | TLVLCRRDGD | LXPGRRSQHRRRLPLAKKSGWYPQP |      |      |
| 42_8428  | QRLCIARALARRPKLLVLDEPT | SALDAESGQSVMDTLR                       | TLVLCRRDGD | LSTAAASPLLRKA             |      |      |
| 43_9819  | QRLCIARALARRPKLLVLDEPT | SALDAESGQSVMDTLR                       | TLVLCRRDGD | LSTAAASPLLRKA             |      |      |
| 44_5569  | QRLCIARALARRPKLLVLDEPT | SALDAESGQSVMDTLR                       | TLVLCRRDGD | LSTAAASPLLRKA             |      |      |
| 45_4189  | QRLCIARALARRPKLLVLDEPT | SALDAESGQSVMDTLR                       | TLVLCRRDGD | LSTAAASPLLRKA             |      |      |
| 46_1027  | QRLCIARALARRPKLLVLDEPT | SALDAESGQSVMDTLR                       | TLVLCRRDGD | LSTAAASPLLRKA             |      |      |
| 47_5048  | QRLCIARALARRPKLLVLDEPT | SALDAESGQSVMDTLR                       | TLVLCRRDGD | LSTAAASPLLRKA             |      |      |
| 48_10124 | QRLCIARALARRPKLLVLDEPT | SALDAESGQSVMDTLR                       | TLVLCRRDGD | LSTAAASPLLRKA             |      |      |
| 49_7151  | QRLCIARALARRPKLLVLDEPT | SALDAESGQSVMDTLR                       | TLVLCRRDGD | LSTAAASPLLRKA             |      |      |
| 50_3695  | QRLCIARALARRPKLLVLDEPT | SALDAESGQSVMDTLR                       | TLVLCRRDGD | LSTAAASPLLRKA             |      |      |
| 51_364   | QRLCIARALARRPKLLVLDEPT | SAXGHSEDPAGGTLSPYSPQHDPFYNWEGNFFRKSEGR |            |                           |      |      |
| 52_242   | QRLCIARALARRPKLLVLDEPT | SALDAESGQSVMDTLR                       | TLVLCRRDGD | LSTAAASPLLRKA             |      |      |
| 53_5225  | QRLCIARALARRPKLLVLDEPT | SALDAESGQSVMDTLR                       | TLVLCRRDGD | LSTAAASPLLRKA             |      |      |
| 54_1635  | QRLCIARALARRPKLLVLDEPT | SALDAESGQSVMDTLR                       | TLVLCRRDGD | LSTAAASPLLRKA             |      |      |
| 55_5766  | QRLCIARALARRPKLLVLDEPT | SALDAESGQSVMDTLR                       | TLVLCRRDGD | LSTAAASPLLRKA             |      |      |
| 56_1557  | QRLCIARALARRPKLLVLDEPT | SALDAESGQSVMDTLR                       | TLVLCRRDGD | LSTAAASPLLRKA             |      |      |
| 57_10137 | QRLCIARALARRPKLLVLDEPT | SALDAESGQSVMDTLR                       | TLVLCRRDGD | LSTAAASPLLRKA             |      |      |
| 58_10525 | QRLCIARALARRPKLLVLDEPT | SALDAESGQSVMDTLR                       | TLVLCRRDGD | LSTAAASPLLRKA             |      |      |
| 59_3457  | QRLCIARALARRPKLLVLDEPT | SALDAESGQSVMDTLR                       | TLVLCRRDGD | LSTAAASPLLRKA             |      |      |
| 60_8244  | QRLCIARALARRPKLLVLDEPT | SALDAESGQSVMDTLR                       | TLVLCRRDGD | LSTAAASPLLRKA             |      |      |
| 61_7964  | QRLCIARALARRPKLLVLDEPT | SALDAESGQSVMDTLR                       | TLVLCRRDGD | LSTAAASPLLRKA             |      |      |
| 62_4413  | QRLCIARALARRPKLLVLDEPT | SALDAESGQSVMDTLR                       | TLVLCRRDGD | LSTAAASPLLRKA             |      |      |
| 63_6958  | QRLCIARALARRPKLLVLDEPT | SALDAESGQSVMDTLR                       | TLVLCRRDGD | LSTAAASPLLRKA             |      |      |
| 64_5997  | .....                  |                                        |            |                           |      |      |
| 65_8711  | QRLCIARALARRPKLLVLDEPT | SALDAESGQSVMDTLR                       | TLVLCRRDGD | LSTAAASPLLRKA             |      |      |
| 66_9925  | QRLCIARALARRPKLLVLDEPT | SALDAESGQSVMDTLR                       | TLVLCRRDGD | LSTAAASPLLRKA             |      |      |
| 67_10374 | QRLCIARALARRPKLLVLDEPT | SALDAESGQSVMDTLR                       | TLVLCRRDGD | LSTAAASPLLRKA             |      |      |
| 68_3713  | QRLCIARALARRPKLLVLDEPT | SALDAESGQSVMDTLR                       | TLVLCRRDGD | LSTAAASPLLRKA             |      |      |
| 69_4511  | QRLCIARALARRPKLLVLDEPT | SALDAESGQSVMDTLR                       | TLVLCRRDGD | LSTAAASPLLRKA             |      |      |
| 70_6201  | QRLCIARALARRPKLLVLDEPT | SALDAESGQSVMDTLR                       | TLVLCRRDGD | LSTAAASPLLRKA             |      |      |
| 71_3261  | QRLCIARALARRPKLLVLDEPT | SALDAESGQSVMDTLR                       | TLVLCRRDGD | LSTAAASPLLRKA             |      |      |
| 72_8516  | QRLCIARALARRPKLLVLDEPT | SALDAESGQSVMDTLR                       | TLVLCRRDGD | LSTAAASPLLRKA             |      |      |
| 73_9295  | QRLCIARALARRPKLLVLDEPT | SALDAESGQSVMDTLR                       | TLVLCRRDGD | LSTAAASPLLRKA             |      |      |
| 74_809   | QRLCIARALARRPKLLVLDEPT | SALDAESGQSVMDTLR                       | TLVLCRRDGD | LSTAAASPLLRKA             |      |      |
| 75_7282  | QRLCIARALARRPKLLVLDEPT | SALDAESGQSVMDTLR                       | TLVLCRRDGD | LSTAAASPLLRKA             |      |      |
| 76_4910  | QRLCIARALARRPKLLVLDEPT | SALDAESGQSVMDTLR                       | TLVLCRRDGD | LSTAAASPLLRKA             |      |      |
| 77_10912 | QRLCIARALARRPKLLVLDEPT | SALDAESGQSVMDTLR                       | TLVLCRRDGD | LSTAAASPLLRKA             |      |      |
| 78_4020  | QRLCIARALARRPKLLVLDEPT | SALDAESGQSVMDTLR                       | TLVLCRRDGD | LSTAAASPLLRKA             |      |      |
| 79_6703  | QRLCIARALARRPKLLVLDEPT | SALDAESGQSVMDTLR                       | TLVLCRRDGD | LSTAAASPLLRKA             |      |      |
| 80_8619  | QRLCIARALARRPKLLVLDEPT | SALDAESGQSVMDTLR                       | TLVLCRRDGD | LSTAAASPLLRKA             |      |      |
| 81_4126  | PKLLVLDEPT             | SALDAESGQSVMDTLR                       | TLVLCRRDGD | LSTAAASPLLRKAGGTLSPYSPQHP |      |      |
| 82_1363  | QRLCIARALARRPKLLVLDEPT | SALDAESGQSVMDTLR                       | TLVLCRRDGD | LSTAAASPLLRKA             |      |      |
| 83_5813  | QRLCIARALARRPKLLVLDEPT | SALDAESGQSVMDTLR                       | TLVLCRRDGD | LSTAAASPLLRKA             |      |      |
| 84_2044  | QRLCIARALARRPKLLVLDEPT | SALDAESGQSVMDTLR                       | TLVLCRRDGD | LSTAAASPLLRKA             |      |      |
| 85_7617  | QRLCIARALARRPKLLVLDEPT | SALDAESGQSVMDTLR                       | TLVLCRRDGD | LSTAAASPLLRKA             |      |      |
| 86_1530  | QRLCIARALARRPKLLVLDEPT | SALDAESGQSVMDTLR                       | TLVLCRRDGD | LSTAAASPLLRKA             |      |      |
| 87_1890  | QRLCIARALARRPKLLVLDEPT | SALDAESGQSVMDTLR                       | TLVLCRRDGD | LSTAAASPLLRKA             |      |      |
| 88_7049  | QRLCIARALARRPKLLVLDEPT | SALDAESGQSVMDTLR                       | TLVLCRRDGD | LSTAAASPLLRKA             |      |      |
| 89_440   | QRLCIARALARRPKLLVLDEPT | SALDAESGQSVMDTLR                       | TLVLCRRDGD | LSTAAASPLLRKA             |      |      |
| 90_4331  | QRLCIARALARRPKLLVLDEPT | SALDAESGQSVMDTLR                       | TLVLCRRDGD | LSTAAASPLLRKA             |      |      |

|          | 1510  | 1520 | 1530 | 1540  | 1550  | 1560                                           |
|----------|-------|------|------|-------|-------|------------------------------------------------|
| 1_1896   | GGT   | LS   | SP   | YSPQH | PD    | PNWEGNFFRKSEGRSFSYVHGAAAGTQHRQPAVVVITHSREMMKMA |
| 2_4785   | GGT   | LS   | SP   | YSPQH | PD    | PNWEGNFFRKSEGRSFSYVHGAAAGTQHRQPAVVVITHSREMMKMA |
| 3_3653   | GGT   | LS   | SP   | YSPQH | PD    | PNWEGNFFRKSEGRSFSYVHGAAAGTQHRQPAVVVITHSREMMKMA |
| 4_8157   | GGT   | LS   | SP   | YSPQH | PD    | PNWEGNFFRKSEGRSFSYVHGAAAGTQHRQPAVVVITHSREMMKMA |
| 5_752    | GGT   | LS   | SP   | YSPQH | PD    | PNWEGNFFRKSEGRSFSYVHGAAAGTQHRQPAVVVITHSREMMKMA |
| 6_8853   | GGT   | LS   | SP   | YSPQH | PD    | PNWEGNFFRKSEGRSFSYVHGAAAGTQHRQPAVVVITHSREMMKMA |
| 7_4015   | ..... |      |      |       |       |                                                |
| 8_2020   | GGT   | LS   | SP   | YSPQH | PD    | PNWEGNFFRKSEGRSFSYVHGAAAGTQHRQPAVVVITHSREMMKMA |
| 9_1829   | GGT   | LS   | SP   | YSPQH | PD    | PNWEGNFFRKSEGRSFSYVHGAAAGTQHRQPAVVVITHSREMMKMA |
| 10_6452  | GGT   | LS   | SP   | YSPQH | PD    | PNWEGNFFRKSEGRSFSYVHGAAAGTQHRQPAVVVITHSREMMKMA |
| 11_8627  | GGT   | LS   | SP   | YSPQH | PD    | PNWEGNFFRKSEGRSFSYVHGAAAGTQHRQPAVVVITHSREMMKMA |
| 12_6118  | GGT   | LS   | SP   | YSPQH | PD    | PNWEGNFFRKSEGRSFSYVHGAAAGTQHRQPAVVVITHSREMMKMA |
| 13_2688  | GGT   | LS   | SP   | YSPQH | PD    | PNWEGNFFRKSEGRSFSYVHGAAAGTQHRQPAVVVITHSREMMKMA |
| 14_6406  | GGT   | LS   | SP   | YSPQH | PD    | PNWEGNFFRKSEGRSFSYVHGAAAGTQHRQPAVVVITHSREMMKMA |
| 15_9419  | GGT   | LS   | SP   | YSPQH | PD    | PNWEGNFFRKSEGRSFSYVHGAAAGTQHRQPAVVVITHSREMMKMA |
| 16_8507  | GGT   | LS   | SP   | YSPQH | PD    | PNWEGNFFRKSEGRSFSYVHGAAAGTQHRQPAVVVITHSREMMKMA |
| 17_5884  | GGT   | LS   | SP   | YSPQH | PD    | PNWEGNFFRKSEGRSFSYVHGAAAGTQHRQPAVVVITHSREMMKMA |
| 18_2670  | GGT   | LS   | SP   | YSPQH | PD    | PNWEGNFFRKSEGRSFSYVHGAAAGTQHRQPAVVVITHSREMMKMA |
| 19_5172  | GGT   | LS   | SP   | YSPQH | PD    | PNWEGNFFRKSEGRSFSYVHGAAAGTQHRQPAVVVITHSREMMKMA |
| 20_8057  | GGT   | LS   | SP   | YSPQH | PD    | PNWEGNFFRKSEGRSFSYVHGAAAGTQHRQPAVVVITHSREMMKMA |
| 21_4920  | ..... |      |      |       |       |                                                |
| 22_6393  | GGT   | LS   | SP   | YSPQH | PD    | PNWEGNFFRKSEGRSFSYVHGAAAGTQHRQPAVVVITHSREMMKMA |
| 23_8263  | GGT   | LS   | SP   | YSPQH | PD    | PNWEGNFFRKSEGRSFSYVHGAAAGTQHRQPAVVVITHSREMMKMA |
| 24_8248  | GGT   | LS   | SP   | YSPQH | PD    | PNWEGNFFRKSEGRSFSYVHGAAAGTQHRQPAVVVITHSREMMKMA |
| 25_6733  | GGT   | LS   | SP   | YSPQH | PD    | PNWEGNFFRKSEGRSFSYVHGAAAGTQHRQPAVVVITHSREMMKMA |
| 26_2277  | GGT   | LS   | SP   | YSPQH | PD    | PNWEGNFFRKSEGRSFSYVHGAAAGTQHRQPAVVVITHSREMMKMA |
| 27_2623  | GGT   | LS   | SP   | YSPQH | PD    | PNWEGNFFRKSEGRSFSYVHGAAAGTQHRQPAVVVITHSREMMKMA |
| 28_7413  | GGT   | LS   | SP   | YSPQH | PD    | PNWEGNFFRKSEGRSFSYVHGAAAGTQHRQPAVVVITHSREMMKMA |
| 29_8980  | GGT   | LS   | SP   | YSPQH | PD    | PNWEGNFFRKSEGRSFSYVHGAAAGTQHRQPAVVVITHSREMMKMA |
| 30_8706  | GGT   | LS   | SP   | YSPQH | PD    | PNWEGNFFRKSEGRSFSYVHGAAAGTQHRQPAVVVITHSREMMKMA |
| 31_6378  | GGT   | LS   | SP   | YSPQH | PD    | PNWEGNFFRKSEGRSFSYVHGAAAGTQHRQPAVVVITHSREMMKMA |
| 32_4679  | GGT   | LS   | SP   | YSPQH | PD    | PNWEGNFFRKSEGRSFSYVHGAAAGTQHRQPAVVVITHSREMMKMA |
| 33_2437  | GGT   | LS   | SP   | YSPQH | PD    | PNWEGNFFRKSEGRSFSYVHGAAAGTQHRQPAVVVITHSREMMKMA |
| 34_9700  | GGT   | LS   | SP   | YSPQH | PD    | PNWEGNFFRKSEGRSFSYVHGAAAGTQHRQPAVVVITHSREMMKMA |
| 35_10218 | GGT   | LS   | SP   | YSPQH | PD    | PNWEGNFFRKSEGRSFSYVHGAAAGTQHRQPAVVVITHSREMMKMA |
| 36_2652  | GGT   | LS   | SP   | YSPQH | PD    | PNWEGNFFRKSEGRSFSYVHGAAAGTQHRQPAVVVITHSREMMKMA |
| 37_5779  | GGT   | LS   | SP   | YSPQH | PD    | PNWEGNFFRKSEGRSFSYVHGAAAGTQHRQPAVVVITHSREMMKMA |
| 38_654   | GGT   | LS   | SP   | YSPQH | PD    | PNWEGNFFRKSEGRSFSYVHGAAAGTQHRQPAVVVITHSREMMKMA |
| 39_4879  | GGT   | LS   | SP   | YSPQH | PD    | PNWEGNFFRKSEGRSFSYVHGAAAGTQHRQPAVVVITHSREMMKMA |
| 40_8113  | GGT   | LS   | SP   | YSPQH | PD    | PNWEGNFFRKSEGRSFSYVHGAAAGTQHRQPAVVVITHSREMMKMA |
| 41_1767  | LQP   | AAP  | RPV  | QLGG  | QQLLP | QERQVQLQLRPRSCRRHTAPAAAGRGHHAFARDDDEDGGPPRRH   |
| 42_8428  | GGT   | LS   | SP   | YSPQH | PD    | PNWEGNFFRKSEGRSFSYVHGAAAGTQHRQPAVVVITHSREMMKMA |
| 43_9819  | GGT   | LS   | SP   | YSPQH | PD    | PNWEGNFFRKSEGRSFSYVHGAAAGTQHRQPAVVVITHSREMMKMA |
| 44_5569  | GGT   | LS   | SP   | YSPQH | PD    | PNWEGNFFRKSEGRSFSYVHGAAAGTQHRQPAVVVITHSREMMKMA |
| 45_4189  | GGT   | LS   | SP   | YSPQH | PD    | PNWEGNFFRKSEGRSFSYVHGAAAGTQHRQPAVVVITHSREMMKMA |
| 46_1027  | GGT   | LS   | SP   | YSPQH | PD    | PNWEGNFFRKSEGRSFSYVHGAAAGTQHRQPAVVVITHSREMMKMA |
| 47_5048  | GGT   | LS   | SP   | YSPQH | PD    | PNWEGNFFRKSEGRSFSYVHGAAAGTQHRQPAVVVITHSREMMKMA |
| 48_10124 | GGT   | LS   | SP   | YSPQH | PD    | PNWEGNFFRKSEGRSFSYVHGAAAGTQHRQPAVVVITHSREMMKMA |
| 49_7151  | GGT   | LS   | SP   | YSPQH | PD    | PNWEGNFFRKSEGRSFSYVHGAAAGTQHRQPAVVVITHSREMMKMA |
| 50_3695  | GGT   | LS   | SP   | YSPQH | PD    | PNWEGNFFRKSEGRSFSYVHGAAAGTQHRQPAVVVITHSREMMKMA |
| 51_364   | SF    | SYV  | HGAA | AGTQ  | HRQPA | VVVITHSREMMKMADRLVVIDNGCVAETGTYEYLMAAGDSRL     |
| 52_242   | GGT   | LS   | SP   | YSPQH | PD    | PNWEGNFFRKSEGRSFSYVHGAAAGTQHRQPAVVVITHSREMMKMA |
| 53_5225  | GGT   | LS   | SP   | YSPQH | PD    | PNWEGNFFRKSEGRSFSYVHGAAAGTQHRQPAVVVITHSREMMKMA |
| 54_1635  | GGT   | LS   | SP   | YSPQH | PD    | PNWEGNFFRKSEGRSFSYVHGAAAGTQHRQPAVVVITHSREMMKMA |
| 55_5766  | GGT   | LS   | SP   | YSPQH | PD    | PNWEGNFFRKSEGRSFSYVHGAAAGTQHRQPAVVVITHSREMMKMA |
| 56_1557  | GGT   | LS   | SP   | YSPQH | PD    | PNWEGNFFRKSEGRSFSYVHGAAAGTQHRQPAVVVITHSREMMKMA |
| 57_10137 | GGT   | LS   | SP   | YSPQH | PD    | PNWEGNFFRKSEGRSFSYVHGAAAGTQHRQPAVVVITHSREMMKMA |
| 58_10525 | GGT   | LS   | SP   | YSPQH | PD    | PNWEGNFFRKSEGRSFSYVHGAAAGTQHRQPAVVVITHSREMMKMA |
| 59_3457  | GGT   | LS   | SP   | YSPQH | PD    | PNWEGNFFRKSEGRSFSYVHGAAAGTQHRQPAVVVITHSREMMKMA |
| 60_8244  | GGT   | LS   | SP   | YSPQH | PD    | PNWEGNFFRKSEGRSFSYVHGAAAGTQHRQPAVVVITHSREMMKMA |
| 61_7964  | GGT   | LS   | SP   | YSPQH | PD    | PNWEGNFFRKSEGRSFSYVHGAAAGTQHRQPAVVVITHSREMMKMA |
| 62_4413  | GGT   | LS   | SP   | YSPQH | PD    | PNWEGNFFRKSEGRSFSYVHGAAAGTQHRQPAVVVITHSREMMKMA |
| 63_6958  | GGT   | LS   | SP   | YSPQH | PD    | PNWEGNFFRKSEGRSFSYVHGAAAGTQHRQPAVVVITHSREMMKMA |
| 64_5997  | ..... |      |      |       |       |                                                |
| 65_8711  | GGT   | LS   | SP   | YSPQH | PD    | PNWEGNFFRKSEGRSFSYVHGAAAGTQHRQPAVVVITHSREMMKMA |
| 66_9925  | GGT   | LS   | SP   | YSPQH | PD    | PNWEGNFFRKSEGRSFSYVHGAAAGTQHRQPAVVVITHSREMMKMA |
| 67_10374 | GGT   | LS   | SP   | YSPQH | PD    | PNWEGNFFRKSEGRSFSYVHGAAAGTQHRQPAVVVITHSREMMKMA |
| 68_3713  | GGT   | LS   | SP   | YSPQH | PD    | PNWEGNFFRKSEGRSFSYVHGAAAGTQHRQPAVVVITHSREMMKMA |
| 69_4511  | GGT   | LS   | SP   | YSPQH | PD    | PNWEGNFFRKSEGRSFSYVHGAAAGTQHRQPAVVVITHSREMMKMA |
| 70_6201  | GGT   | LS   | SP   | YSPQH | PD    | PNWEGNFFRKSEGRSFSYVHGAAAGTQHRQPAVVVITHSREMMKMA |
| 71_3261  | GGT   | LS   | SP   | YSPQH | PD    | PNWEGNFFRKSEGRSFSYVHGAAAGTQHRQPAVVVITHSREMMKMA |
| 72_8516  | GGT   | LS   | SP   | YSPQH | PD    | PNWEGNFFRKSEGRSFSYVHGAAAGTQHRQPAVVVITHSREMMKMA |
| 73_9295  | GGT   | LS   | SP   | YSPQH | PD    | PNWEGNFFRKSEGRSFSYVHGAAAGTQHRQPAVVVITHSREMMKMA |
| 74_809   | GGT   | LS   | SP   | YSPQH | PD    | PNWEGNFFRKSEGRSFSYVHGAAAGTQHRQPAVVVITHSREMMKMA |
| 75_7282  | GGT   | LS   | SP   | YSPQH | PD    | PNWEGNFFRKSEGRSFSYVHGAAAGTQHRQPAVVVITHSREMMKMA |
| 76_4910  | GGT   | LS   | SP   | YSPQH | PD    | PNWEGNFFRKSEGRSFSYVHGAAAGTQHRQPAVVVITHSREMMKMA |
| 77_10912 | GGT   | LS   | SP   | YSPQH | PD    | PNWEGNFFRKSEGRSFSYVHGAAAGTQHRQPAVVVITHSREMMKMA |
| 78_4020  | GGT   | LS   | SP   | YSPQH | PD    | PNWEGNFFRKSEGRSFSYVHGAAAGTQHRQPAVVVITHSREMMKMA |
| 79_6703  | GGT   | LS   | SP   | YSPQH | PD    | PNWEGNFFRKSEGRSFSYVHGAAAGTQHRQPAVVVITHSREMMKMA |
| 80_8619  | GGT   | LS   | SP   | YSPQH | PD    | PNWEGNFFRKSEGRSFSYVHGAAAGTQHRQPAVVVITHSREMMKMA |
| 81_4126  | DP    | YNW  | EGN  | FFRK  | SEGRS | FYSYVHGAAAGTQHRQPAVVVITHSREMMKMADRLVVIDNGCVA   |
| 82_1363  | GGT   | LS   | SP   | YSPQH | PD    | PNWEGNFFRKSEGRSFSYVHGAAAGTQHRQPAVVVITHSREMMKMA |
| 83_5813  | GGT   | LS   | SP   | YSPQH | PD    | PNWEGNFFRKSEGRSFSYVHGAAAGTQHRQPAVVVITHSREMMKMA |
| 84_2044  | GGT   | LS   | SP   | YSPQH | PD    | PNWEGNFFRKSEGRSFSYVHGAAAGTQHRQPAVVVITHSREMMKMA |
| 85_7617  | GGT   | LS   | SP   | YSPQH | PD    | PNWEGNFFRKSEGRSFSYVHGAAAGTQHRQPAVVVITHSREMMKMA |
| 86_1530  | GGT   | LS   | SP   | YSPQH | PD    | PNWEGNFFRKSEGRSFSYVHGAAAGTQHRQPAVVVITHSREMMKMA |
| 87_1890  | GGT   | LS   | SP   | YSPQH | PD    | PNWEGNFFRKSEGRSFSYVHGAAAGTQHRQPAVVVITHSREMMKMA |
| 88_7049  | GGT   | LS   | SP   | YSPQH | PD    | PNWEGNFFRKSEGRSFSYVHGAAAGTQHRQPAVVVITHSREMMKMA |
| 89_440   | GGT   | LS   | SP   | YSPQH | PD    | PNWEGNFFRKSEGRSFSYVHGAAAGTQHRQPAVVVITHSREMMKMA |
| 90_4331  | GGT   | LS   | SP   | YSPQH | PD    | PNWEGNFFRKSEGRSFSYVHGAAAGTQHRQPAVVVITHSREMMKMA |

|          | 1570             | 1580           | 1590           | 1600       | 1610       | 1620     |
|----------|------------------|----------------|----------------|------------|------------|----------|
| 1_1896   | DRLVVIDNGCVAETGT | TYEYLMAAGDSRLA | ELLDDGGYRAPAAK | SSGVPMEK   | TTSLEPVPVS |          |
| 2_4785   | DRLVVIDNGCVAETGT | TYEYLMAAGDSRLA | ELLDDGGYRAPAAK | SSGVPMEK   | TTSLEPVPVS |          |
| 3_3653   | DRLVVIDNGCVAETGT | TYEYLMAAGDSRLA | ELLDDGGYRAPAAK | SSGVPMEK   | TTSLEPVPVS |          |
| 4_8157   | DRLVVIDNGCVAETGT | TYEYLMAAGDSRLA | ELLDDGGYRAPAAK | SSGVPMEK   | TTSLEPVPVS |          |
| 5_752    | DRLVVIDNGCVAETGT | TYEYLMAAGDSRLA | ELLDDGGYRAPAAK | SSGVPMEK   | TTSLEPVPVS |          |
| 6_8853   | DRLVVIDNGCVAETGT | TYEYLMAAGDSRLA | ELLDDGGYRAPAAK | SSGVPMEK   | TTSLEPVPVS |          |
| 7_4015   | .....            | .....          | .....          | .....      | .....      | .....    |
| 8_2020   | DRLVVIDNGCVAETGT | TYEYLMAAGDSRLA | ELLDDGGYRAPAAK | SSGVPMEK   | TTSLEPVPVS |          |
| 9_1829   | DRLVVIDNGCVAETGT | TYEYLMAAGDSRLA | ELLDDGGYRAPAAK | SSGVPMEK   | TTSLEPVPVS |          |
| 10_6452  | DRLVVIDNGCVAETGT | TYEYLMAAGDSRLA | ELLDDGGYRAPAAK | SSGVPMEK   | TTSLEPVPVS |          |
| 11_8627  | DRLVVIDNGCVAETGT | TYEYLMAAGDSRLA | ELLDDGGYRAPAAK | SSGVPMEK   | TTSLEPVPVS |          |
| 12_6118  | DRLVVIDNGCVAETGT | TYEYLMAAGDSRLA | ELLDDGGYRAPAAK | SSGVPMEK   | TTSLEPVPVS |          |
| 13_2688  | DRLVVIDNGCVAETGT | TYEYLMAAGDSRLA | ELLDDGGYRAPAAK | SSGVPMEK   | TTSLEPVPVS |          |
| 14_6406  | DRLVVIDNGCVAETGT | TYEYLMAAGDSRLA | ELLDDGGYRAPAAK | SSGVPMEK   | TTSLEPVPVS |          |
| 15_9419  | DRLVVIDNGCVAETGT | TYEYLMAAGDSRLA | ELLDDGGYRAPAAK | SSGVPMEK   | TTSLEPVPVS |          |
| 16_8507  | DRLVVIDNGCVAETGT | TYEYLMAAGDSRLA | ELLDDGGYRAPAAK | SSGVPMEK   | TTSLEPVPVS |          |
| 17_5884  | DRLVVIDNGCVAETGT | TYEYLMAAGDSRLA | ELLDDGGYRAPAAK | SSGVPMEK   | TTSLEPVPVS |          |
| 18_2670  | DRLVVIDNGCVAETGT | TYEYLMAAGDSRLA | ELLDDGGYRAPAAK | SSGVPMEK   | TTSLEPVPVS |          |
| 19_5172  | DRLVVIDNGCVAETGT | TYEYLMAAGDSRLA | ELLDDGGYRAPAAK | SSGVPMEK   | TTSLEPVPVS |          |
| 20_8057  | DRLVVIDNGCVAETGT | TYEYLMAAGDSRLA | ELLDDGGYRAPAAK | SSGVPMEK   | TTSLEPVPVS |          |
| 21_4920  | .....            | .....          | .....          | .....      | .....      | .....    |
| 22_6393  | DRLVVIDNGCVAETGT | TYEYLMAAGDSRLA | ELLDDGGYRAPAAK | SSGVPMEK   | TTSLEPVPVS |          |
| 23_8263  | DRLVVIDNGCVAETGT | TYEYLMAAGDSRLA | ELLDDGGYRAPAAK | SSGVPMEK   | TTSLEPVPVS |          |
| 24_8248  | DRLVVIDNGCVAETGT | TYEYLMAAGDSRLA | ELLDDGGYRAPAAK | SSGVPMEK   | TTSLEPVPVS |          |
| 25_6733  | DRLVVIDNGCVAETGT | TYEYLMAAGDSRLA | ELLDDGGYRAPAAK | SSGVPMEK   | TTSLEPVPVS |          |
| 26_2277  | DRLVVIDNGCVAETGT | TYEYLMAAGDSRLA | ELLDDGGYRAPAAK | SSGVPMEK   | TTSLEPVPVS |          |
| 27_2623  | DRLVVIDNGCVAETGT | TYEYLMAAGDSRLA | ELLDDGGYRAPAAK | SSGVPMEK   | TTSLEPVPVS |          |
| 28_7413  | DRLVVIDNGCVAETGT | TYEYLMAAGDSRLA | ELLDDGGYRAPAAK | SSGVPMEK   | TTSLEPVPVS |          |
| 29_8980  | DRLVVIDNGCVAETGT | TYEYLMAAGDSRLA | ELLDDGGYRAPAAK | SSGVPMEK   | TTSLEPVPVS |          |
| 30_8706  | DRLVVIDNGCVAETGT | TYEYLMAAGDSRLA | ELLDDGGYRAPAAK | SSGVPMEK   | TTSLEPVPVS |          |
| 31_6378  | DRLVVIDNGCVAETGT | TYEYLMAAGDSRLA | ELLDDGGYRAPAAK | SSGVPMEK   | TTSLEPVPVS |          |
| 32_4679  | DRLVVIDNGCVAETGT | TYEYLMAAGDSRLA | ELLDDGGYRAPAAK | SSGVPMEK   | TTSLEPVPVS |          |
| 33_2437  | DRLVVIDNGCVAETGT | TYEYLMAAGDSRLA | ELLDDGGYRAPAAK | SSGVPMEK   | TTSLEPVPVS |          |
| 34_9700  | DRLVVIDNGCVAETGT | TYEYLMAAGDSRLA | ELLDDGGYRAPAAK | SSGVPMEK   | TTSLEPVPVS |          |
| 35_10218 | DRLVVIDNGCVAETGT | TYEYLMAAGDSRLA | ELLDDGGYRAPAAK | SSGVPMEK   | TTSLEPVPVS |          |
| 36_2652  | DRLVVIDNGCVAETGT | TYEYLMAAGDSRLA | ELLDDGGYRAPAAK | SSGVPMEK   | TTSLEPVPVS |          |
| 37_5779  | DRLVVIDNGCVAETGT | TYEYLMAAGDSRLA | ELLDDGGYRAPAAK | SSGVPMEK   | TTSLEPVPVS |          |
| 38_654   | DRLVVIDNGCVAETGT | TYEYLMAAGDSRLA | ELLDDGGYRAPAAK | SSGVPMEK   | TTSLEPVPVS |          |
| 39_4879  | DRLVVIDNGCVAETGT | TYEYLMAAGDSRLA | ELLDDGGYRAPAAK | SSGVPMEK   | TTSLEPVPVS |          |
| 40_8113  | DRLVVIDNGCVAETGT | TYEYLMAAGDSRLA | ELLDDGGYRAPAAK | SSGVPMEK   | TTSLEPVPVS |          |
| 41_1767  | RQRLRGRD         | GHL.....       | .....          | .....      | .....      | .....    |
| 42_8428  | DRLVVIDNGCVAETGT | TYEYLMAAGDSRLA | ELLDDGGYRAPAAK | SSGVPMEK   | TTSLEPVPVS |          |
| 43_9819  | DRLVVIDNGCVAETGT | TYEYLMAAGDSRLA | ELLDDGGYRAPAAK | SSGVPMEK   | TTSLEPVPVS |          |
| 44_5569  | DRLVVIDNGCVAETGT | TYEYLMAAGDSRLA | ELLDDGGYRAPAAK | SSGVPMEK   | TTSLEPVPVS |          |
| 45_4189  | DRLVVIDNGCVAETGT | TYEYLMAAGDSRLA | ELLDDGGYRAPAAK | SSGVPMEK   | TTSLEPVPVS |          |
| 46_1027  | DRLVVIDNGCVAETGT | TYEYLMAAGDSRLA | ELLDDGGYRAPAAK | SSGVPMEK   | TTSLEPVPVS |          |
| 47_5048  | DRLVVIDNGCVAETGT | TYEYLMAAGDSRLA | ELLDDGGYRAPAAK | SSGVPMEK   | TTSLEPVPVS |          |
| 48_10124 | DRLVVIDNGCVAETGT | TYEYLMAAGDSRLA | ELLDDGGYRAPAAK | SSGVPMEK   | TTSLEPVPVS |          |
| 49_7151  | DRLVVIDNGCVAETGT | TYEYLMAAGDSRLA | ELLDDGGYRAPAAK | SSGVPMEK   | TTSLEPVPVS |          |
| 50_3695  | DRLVVIDNGCVAETGT | TYEYLMAAGDSRLA | ELLDDGGYRAPAAK | SSGVPMEK   | TTSLEPVPVS |          |
| 51_364   | AELLDDGGYRAPAAK  | SSGVPMENTT     | SLEPVPVSPRTL   | TRVVS      | SPSP       | EQYRRN   |
| 52_242   | DRLVVIDNGCVAETGT | TYEYLMAAGDSRLA | ELLDDGGYRAPAAK | SSGVPMEK   | TTSLEPVPVS |          |
| 53_5225  | DRLVVIDNGCVAETGT | TYEYLMAAGDSRLA | ELLDDGGYRAPAAK | SSGVPMEK   | TTSLEPVPVS |          |
| 54_1635  | DRLVVIDNGCVAETGT | TYEYLMAAGDSRLA | ELLDDGGYRAPAAK | SSGVPMEK   | TTSLEPVPVS |          |
| 55_5766  | DRLVVIDNGCVAETGT | TYEYLMAAGDSRLA | ELLDDGGYRAPAAK | SSGVPMEK   | TTSLEPVPVS |          |
| 56_1557  | DRLVVIDNGCVAETGT | TYEYLMAAGDSRLA | ELLDDGGYRAPAAK | SSGVPMEK   | TTSLEPVPVS |          |
| 57_10137 | DRLVVIDNGCVAETGT | TYEYLMAAGDSRLA | ELLDDGGYRAPAAK | SSGVPMEK   | TTSLEPVPVS |          |
| 58_10525 | DRLVVIDNGCVAETGT | TYEYLMAAGDSRLA | ELLDDGGYRAPAAK | SSGVPMEK   | TTSLEPVPVS |          |
| 59_3457  | DRLVVIDNGCVAETGT | TYEYLMAAGDSRLA | ELLDDGGYRAPAAK | SSGVPMEK   | TTSLEPVPVS |          |
| 60_8244  | DRLVVIDNGCVAETGT | TYEYLMAAGDSRLA | ELLDDGGYRAPAAK | SSGVPMEK   | TTSLEPVPVS |          |
| 61_7964  | DRLVVIDNGCVAETGT | TYEYLMAAGDSRLA | ELLDDGGYRAPAAK | SSGVPMEK   | TTSLEPVPVS |          |
| 62_4413  | DRLVVIDNGCVAETGT | TYEYLMAAGDSRLA | ELLDDGGYRAPAAK | SSGVPMEK   | TTSLEPVPVS |          |
| 63_6958  | DRLVVIDNGCVAETGT | TYEYLMAAGDSRLA | ELLDDGGYRAPAAK | SSGVPMEK   | TTSLEPVPVS |          |
| 64_5997  | .....            | .....          | .....          | .....      | .....      | .....    |
| 65_8711  | DRLVVIDNGCVAETGT | TYEYLMAAGDSRLA | ELLDDGGYRAPAAK | SSGVPMEK   | TTSLEPVPVS |          |
| 66_9925  | DRLVVIDNGCVAETGT | TYEYLMAAGDSRLA | ELLDDGGYRAPAAK | SSGVPMEK   | TTSLEPVPVS |          |
| 67_10374 | DRLVVIDNGCVAETGT | TYEYLMAAGDSRLA | ELLDDGGYRAPAAK | SSGVPMEK   | TTSLEPVPVS |          |
| 68_3713  | DRLVVIDNGCVAETGT | TYEYLMAAGDSRLA | ELLDDGGYRAPAAK | SSGVPMEK   | TTSLEPVPVS |          |
| 69_4511  | DRLVVIDNGCVAETGT | TYEYLMAAGDSRLA | ELLDDGGYRAPAAK | SSGVPMEK   | TTSLEPVPVS |          |
| 70_6201  | DRLVVIDNGCVAETGT | TYEYLMAAGDSRLA | ELLDDGGYRAPAAK | SSGVPMEK   | TTSLEPVPVS |          |
| 71_3261  | DRLVVIDNGCVAETGT | TYEYLMAAGDSRLA | ELLDDGGYRAPAAK | SSGVPMEK   | TTSLEPVPVS |          |
| 72_8516  | DRLVVIDNGCVAETGT | TYEYLMAAGDSRLA | ELLDDGGYRAPAAK | SSGVPMEK   | TTSLEPVPVS |          |
| 73_9295  | DRLVVIDNGCVAETGT | TYEYLMAAGDSRLA | ELLDDGGYRAPAAK | SSGVPMEK   | TTSLEPVPVS |          |
| 74_809   | DRLVVIDNGCVAETGT | TYEYLMAAGDSRLA | ELLDDGGYRAPAAK | SSGVPMEK   | TTSLEPVPVS |          |
| 75_7282  | DRLVVIDNGCVAETGT | TYEYLMAAGDSRLA | ELLDDGGYRAPAAK | SSGVPMEK   | TTSLEPVPVS |          |
| 76_4910  | DRLVVIDNGCVAETGT | TYEYLMAAGDSRLA | ELLDDGGYRAPAAK | SSGVPMEK   | TTSLEPVPVS |          |
| 77_10912 | DRLVVIDNGCVAETGT | TYEYLMAAGDSRLA | ELLDDGGYRAPAAK | SSGVPMEK   | TTSLEPVPVS |          |
| 78_4020  | DRLVVIDNGCVAETGT | TYEYLMAAGDSRLA | ELLDDGGYRAPAAK | SSGVPMEK   | TTSLEPVPVS |          |
| 79_6703  | DRLVVIDNGCVAETGT | TYEYLMAAGDSRLA | ELLDDGGYRAPAAK | SSGVPMEK   | TTSLEPVPVS |          |
| 80_8619  | DRLVVIDNGCVAETGT | TYEYLMAAGDSRLA | ELLDDGGYRAPAAK | SSGVPMEK   | TTSLEPVPVS |          |
| 81_4126  | ETGT             | TYEYLMAAGDSRLA | ELLDDGGYRAPAAK | SSGVPMENTT | SLEPVPVSP  | RTLTRVVS |
| 82_1363  | DRLVVIDNGCVAETGT | TYEYLMAAGDSRLA | ELLDDGGYRAPAAK | SSGVPMEK   | TTSLEPVPVS |          |
| 83_5813  | DRLVVIDNGCVAETGT | TYEYLMAAGDSRLA | ELLDDGGYRAPAAK | SSGVPMEK   | TTSLEPVPVS |          |
| 84_2044  | DRLVVIDNGCVAETGT | TYEYLMAAGDSRLA | ELLDDGGYRAPAAK | SSGVPMEK   | TTSLEPVPVS |          |
| 85_7617  | DRLVVIDNGCVAETGT | TYEYLMAAGDSRLA | ELLDDGGYRAPAAK | SSGVPMEK   | TTSLEPVPVS |          |
| 86_1530  | DRLVVIDNGCVAETGT | TYEYLMAAGDSRLA | ELLDDGGYRAPAAK | SSGVPMEK   | TTSLEPVPVS |          |
| 87_1890  | DRLVVIDNGCVAETGT | TYEYLMAAGDSRLA | ELLDDGGYRAPAAK | SSGVPMEK   | TTSLEPVPVS |          |
| 88_7049  | DRLVVIDNGCVAETGT | TYEYLMAAGDSRLA | ELLDDGGYRAPAAK | SSGVPMEK   | TTSLEPVPVS |          |
| 89_440   | DRLVVIDNGCVAETGT | TYEYLMAAGDSRLA | ELLDDGGYRAPAAK | SSGVPMEK   | TTSLEPVPVS |          |
| 90_4331  | DRLVVIDNGCVAETGT | TYEYLMAAGDSRLA | ELLDDGGYRAPAAK | SSGVPMEK   | TTSLEPVPVS |          |

|          | 1 6 3 0 | 1 6 4 0 | 1 6 5 0 | 1 6 6 0 | 1 6 7 0 |
|----------|---------|---------|---------|---------|---------|
| 1_1896   | P       | R       | T       | T       | L       |
| 2_4785   | R       | V       | V       | S       | P       |
| 3_3653   | S       | P       | E       | Q       | Y       |
| 4_8157   | R       | R       | N       | N       | R       |
| 5_752    | S       | S       | P       | G       | G       |
| 6_8853   | I       | P       | Q       | R       | P       |
| 7_4015   | G       | M       | N       | M       | E       |
| 8_2020   | D       | M       | F       | L       | P       |
| 9_1829   | Q       | V       | A       | W       | Q       |
| 10_6452  | E       | D       | D       | R       | S       |
| 11_8627  | P       | R       | T       | T       | L       |
| 12_6118  | R       | V       | V       | S       | P       |
| 13_2688  | S       | P       | E       | Q       | Y       |
| 14_6406  | R       | R       | N       | N       | R       |
| 15_9419  | S       | S       | P       | G       | G       |
| 16_8507  | I       | P       | Q       | R       | P       |
| 17_5884  | G       | M       | N       | M       | E       |
| 18_2670  | D       | M       | F       | L       | P       |
| 19_5172  | Q       | V       | A       | W       | Q       |
| 20_8057  | E       | D       | D       | R       | S       |
| 21_4920  | P       | R       | T       | T       | L       |
| 22_6393  | R       | V       | V       | S       | P       |
| 23_8263  | S       | P       | E       | Q       | Y       |
| 24_8248  | R       | R       | N       | N       | R       |
| 25_6733  | S       | S       | P       | G       | G       |
| 26_2277  | I       | P       | Q       | R       | P       |
| 27_2623  | G       | M       | N       | M       | E       |
| 28_7413  | D       | M       | F       | L       | P       |
| 29_8980  | Q       | V       | A       | W       | Q       |
| 30_8706  | E       | D       | D       | R       | S       |
| 31_6378  | P       | R       | T       | T       | L       |
| 32_4679  | R       | V       | V       | S       | P       |
| 33_2437  | S       | P       | E       | Q       | Y       |
| 34_9700  | R       | R       | N       | N       | R       |
| 35_10218 | S       | S       | P       | G       | G       |
| 36_2652  | I       | P       | Q       | R       | P       |
| 37_5779  | G       | M       | N       | M       | E       |
| 38_654   | D       | M       | F       | L       | P       |
| 39_4879  | Q       | V       | A       | W       | Q       |
| 40_8113  | E       | D       | D       | R       | S       |
| 41_1767  | P       | R       | T       | T       | L       |
| 42_8428  | R       | V       | V       | S       | P       |
| 43_9819  | S       | P       | E       | Q       | Y       |
| 44_5569  | R       | R       | N       | N       | R       |
| 45_4189  | S       | S       | P       | G       | G       |
| 46_1027  | I       | P       | Q       | R       | P       |
| 47_5048  | G       | M       | N       | M       | E       |
| 48_10124 | D       | M       | F       | L       | P       |
| 49_7151  | Q       | V       | A       | W       | Q       |
| 50_3695  | E       | D       | D       | R       | S       |
| 51_364   | P       | R       | T       | T       | L       |
| 52_242   | R       | V       | V       | S       | P       |
| 53_5225  | S       | P       | E       | Q       | Y       |
| 54_1635  | R       | R       | N       | N       | R       |
| 55_5766  | S       | S       | P       | G       | G       |
| 56_1557  | I       | P       | Q       | R       | P       |
| 57_10137 | G       | M       | N       | M       | E       |
| 58_10525 | D       | M       | F       | L       | P       |
| 59_3457  | Q       | V       | A       | W       | Q       |
| 60_8244  | E       | D       | D       | R       | S       |
| 61_7964  | P       | R       | T       | T       | L       |
| 62_4413  | R       | V       | V       | S       | P       |
| 63_6958  | S       | P       | E       | Q       | Y       |
| 64_5997  | R       | R       | N       | N       | R       |
| 65_8711  | S       | S       | P       | G       | G       |
| 66_9925  | I       | P       | Q       | R       | P       |
| 67_10374 | G       | M       | N       | M       | E       |
| 68_3713  | D       | M       | F       | L       | P       |
| 69_4511  | Q       | V       | A       | W       | Q       |
| 70_6201  | E       | D       | D       | R       | S       |
| 71_3261  | P       | R       | T       | T       | L       |
| 72_8516  | R       | V       | V       | S       | P       |
| 73_9295  | S       | P       | E       | Q       | Y       |
| 74_809   | R       | R       | N       | N       | R       |
| 75_7282  | S       | S       | P       | G       | G       |
| 76_4910  | I       | P       | Q       | R       | P       |
| 77_10912 | G       | M       | N       | M       | E       |
| 78_4020  | D       | M       | F       | L       | P       |
| 79_6703  | Q       | V       | A       | W       | Q       |
| 80_8619  | E       | D       | D       | R       | S       |
| 81_4126  | P       | R       | T       | T       | L       |
| 82_1363  | R       | V       | V       | S       | P       |
| 83_5813  | S       | P       | E       | Q       | Y       |
| 84_2044  | R       | R       | N       | N       | R       |
| 85_7617  | S       | S       | P       | G       | G       |
| 86_1530  | I       | P       | Q       | R       | P       |
| 87_1890  | G       | M       | N       | M       | E       |
| 88_7049  | D       | M       | F       | L       | P       |
| 89_440   | Q       | V       | A       | W       | Q       |
| 90_4331  | E       | D       | D       | R       | S       |
